# Supplementary material for: Mitochondrial F-ATP Synthase Co-Migrating Proteins and Ca2+-Dependent Formation of Large Channels
Source: Cells. 2023 Oct 7;12(19):2414. doi: 10.3390/cells12192414 (PMC10572550; doi:10.3390/cells12192414)
Supplement: Supplementary file 1 [file cells-12-02414-s001.zip]

Archive with 12 entries (12 files):
- blots Kruglov.pdf
- cells-2506926-supplementary.pdf
- Dataset S1.xls
- Dataset S10.xlsx
- Dataset S2.xlsx
- Dataset S3.xlsx
- Dataset S4.xlsx
- Dataset S5.xlsx
- Dataset S6.xlsx
- Dataset S7.xlsx
- Dataset S8.xlsx
- Dataset S9.xlsx
