# Supplementary material for: Mitochondrial F-ATP Synthase Co-Migrating Proteins and Ca2+-Dependent Formation of Large Channels
Source: Cells. 2023 Oct 7;12(19):2414. doi: 10.3390/cells12192414 (PMC10572550; doi:10.3390/cells12192414)
Supplement: Supplementary file 1 [file cells-12-02414-s001.zip › Dataset S1.xls]

## Sheet: Dimer
Accession	Protein Group	Protein ID	-10lgP	Coverage (%)	Coverage (%) Sample 4	Area Sample 4	#Peptides	#Unique	#Spec Sample 4	PTM	Avg. Mass	Description
P10719|ATPB_RAT	2	1	378.4	50	50	345830000	124	124	582	Y	56354	ATP synthase subunit beta, mitochondrial OS=Rattus norvegicus OX=10116 GN=Atp5f1b PE=1 SV=2
tr|G3V6D3|G3V6D3_RAT	2	2	378.4	50	50	345830000	124	124	582	Y	56345	ATP synthase subunit beta OS=Rattus norvegicus OX=10116 GN=Atp5f1b PE=1 SV=1
P15999|ATPA_RAT	1	3	312.23	48	48	267690000	108	108	601	Y	59754	ATP synthase subunit alpha, mitochondrial OS=Rattus norvegicus OX=10116 GN=Atp5f1a PE=1 SV=2
tr|F1LP05|F1LP05_RAT	1	4	312.23	48	48	267690000	108	108	601	Y	59813	ATP synthase subunit alpha OS=Rattus norvegicus OX=10116 GN=Atp5f1a PE=1 SV=1
Q66HF1|NDUS1_RAT	3	3421	260.31	28	28	48874000	56	56	173	Y	79412	NADH-ubiquinone oxidoreductase 75 kDa subunit, mitochondrial OS=Rattus norvegicus OX=10116 GN=Ndufs1 PE=1 SV=1
P31399|ATP5H_RAT	9	7	247.72	53	53	20584000	21	21	67	Y	18763	ATP synthase subunit d, mitochondrial OS=Rattus norvegicus OX=10116 GN=Atp5pd PE=1 SV=3
P35435|ATPG_RAT	6	5	246.27	34	34	22396000	26	26	89	Y	30191	ATP synthase subunit gamma, mitochondrial OS=Rattus norvegicus OX=10116 GN=Atp5f1c PE=1 SV=2
tr|Q6QI09|Q6QI09_RAT	6	6	246.27	15	15	22396000	26	26	89	Y	67721	ATP synthase subunit gamma, mitochondrial OS=Rattus norvegicus OX=10116 GN=Taf3 PE=1 SV=1
P19234|NDUV2_RAT	4	2870	232.09	39	39	66119000	31	31	121	N	27378	NADH dehydrogenase [ubiquinone] flavoprotein 2, mitochondrial OS=Rattus norvegicus OX=10116 GN=Ndufv2 PE=1 SV=2
Q5BK63|NDUA9_RAT	7	5406	228.99	38	38	15159000	31	30	81	N	42559	NADH dehydrogenase [ubiquinone] 1 alpha subcomplex subunit 9, mitochondrial OS=Rattus norvegicus OX=10116 GN=Ndufa9 PE=1 SV=2
tr|B2RYS8|B2RYS8_RAT	15	2857	219.65	23	23	19269000	13	13	38	Y	21959	NADH dehydrogenase [ubiquinone] 1 beta subcomplex subunit 8, mitochondrial OS=Rattus norvegicus OX=10116 GN=Ndufb8 PE=1 SV=1
Q641Y2|NDUS2_RAT	5	2856	210.73	30	30	34707000	32	32	101	Y	52562	NADH dehydrogenase [ubiquinone] iron-sulfur protein 2, mitochondrial OS=Rattus norvegicus OX=10116 GN=Ndufs2 PE=1 SV=1
tr|D3ZG43|D3ZG43_RAT	8	2807	206.44	43	43	23602000	35	35	79	N	30226	NADH dehydrogenase (Ubiquinone) Fe-S protein 3 (Predicted), isoform CRA_c OS=Rattus norvegicus OX=10116 GN=Ndufs3 PE=1 SV=1
tr|D3ZF13|D3ZF13_RAT	13	3210	194.65	28	28	14275000	17	17	49	Y	17514	Acyl carrier protein OS=Rattus norvegicus OX=10116 GN=Ndufab1 PE=1 SV=1
Q68FY0|QCR1_RAT	14	118	176.06	23	23	10042000	23	23	47	Y	52849	Cytochrome b-c1 complex subunit 1, mitochondrial OS=Rattus norvegicus OX=10116 GN=Uqcrc1 PE=1 SV=1
tr|D4A565|D4A565_RAT	26	5412	173.26	34	34	6636500	15	15	24	N	21664	NADH dehydrogenase (Ubiquinone) 1 beta subcomplex, 5 (Predicted), isoform CRA_b OS=Rattus norvegicus OX=10116 GN=Ndufb5 PE=1 SV=1
tr|D4A7L4|D4A7L4_RAT	17	2872	172.5	32	32	14159000	13	13	36	Y	17634	NADH dehydrogenase (Ubiquinone) 1 beta subcomplex, 11 (Predicted) OS=Rattus norvegicus OX=10116 GN=Ndufb11 PE=1 SV=1
tr|D3ZFQ8|D3ZFQ8_RAT	27	133	167.41	12	12	7580300	7	7	23	Y	35435	Cytochrome c-1 OS=Rattus norvegicus OX=10116 GN=Cyc1 PE=1 SV=3
tr|B0BNE6|B0BNE6_RAT	21	5411	167.03	26	26	7454200	13	13	32	Y	23970	NADH dehydrogenase (Ubiquinone) Fe-S protein 8 (Predicted), isoform CRA_a OS=Rattus norvegicus OX=10116 GN=Ndufs8 PE=1 SV=1
P32551|QCR2_RAT	10	34	164.71	18	18	15525000	22	22	55	N	48396	Cytochrome b-c1 complex subunit 2, mitochondrial OS=Rattus norvegicus OX=10116 GN=Uqcrc2 PE=1 SV=2
tr|Q5XIH3|Q5XIH3_RAT	11	5408	161.2	22	22	11086000	17	17	52	N	50731	NADH dehydrogenase [ubiquinone] flavoprotein 1, mitochondrial OS=Rattus norvegicus OX=10116 GN=Ndufv1 PE=1 SV=1
tr|Q5PQZ9|Q5PQZ9_RAT	16	2821	154.05	27	27	18181000	10	10	37	N	14359	NADH dehydrogenase [ubiquinone] 1 subunit C2 OS=Rattus norvegicus OX=10116 GN=Ndufc2 PE=1 SV=1
P00507|AATM_RAT	30	19	153.42	16	16	2596800	10	10	20	Y	47314	Aspartate aminotransferase, mitochondrial OS=Rattus norvegicus OX=10116 GN=Got2 PE=1 SV=2
Q80W89|NDUAB_RAT	29	5440	151.01	19	19	6841500	7	7	22	N	14854	NADH dehydrogenase [ubiquinone] 1 alpha subcomplex subunit 11 OS=Rattus norvegicus OX=10116 GN=Ndufa11 PE=2 SV=1
tr|A0A0G2JVL6|A0A0G2JVL6_RAT	20	3028	148.03	29	29	8295600	11	11	32	N	19965	NADH dehydrogenase [ubiquinone] 1 alpha subcomplex subunit 8 OS=Rattus norvegicus OX=10116 GN=Ndufa8 PE=1 SV=1
tr|D4A0T0|D4A0T0_RAT	28	180	142.75	21	21	12726000	9	9	22	N	20859	NADH:ubiquinone oxidoreductase subunit B10 OS=Rattus norvegicus OX=10116 GN=Ndufb10 PE=1 SV=1
P11240|COX5A_RAT	25	86	141.75	42	42	4296900	9	9	25	N	16130	Cytochrome c oxidase subunit 5A, mitochondrial OS=Rattus norvegicus OX=10116 GN=Cox5a PE=1 SV=1
tr|Q06QK5|Q06QK5_RAT	23	5413	140.47	9	9	8536000	11	11	27	Y	68606	NADH-ubiquinone oxidoreductase chain 5 OS=Rattus norvegicus OX=10116 GN=ND5 PE=3 SV=1
P11661|NU5M_RAT	23	5414	140.47	9	9	8536000	11	11	27	Y	68618	NADH-ubiquinone oxidoreductase chain 5 OS=Rattus norvegicus OX=10116 GN=Mtnd5 PE=3 SV=3
tr|Q06QG6|Q06QG6_RAT	23	5415	140.47	9	9	8536000	11	11	27	Y	68588	NADH-ubiquinone oxidoreductase chain 5 OS=Rattus norvegicus OX=10116 GN=ND5 PE=3 SV=1
tr|Q06QA1|Q06QA1_RAT	23	5416	140.47	9	9	8536000	11	11	27	Y	68574	NADH-ubiquinone oxidoreductase chain 5 OS=Rattus norvegicus OX=10116 GN=ND5 PE=3 SV=1
tr|Q8SEZ0|Q8SEZ0_RAT	23	5417	140.47	9	9	8536000	11	11	27	Y	68618	NADH-ubiquinone oxidoreductase chain 5 OS=Rattus norvegicus OX=10116 GN=Mt-nd5 PE=3 SV=1
tr|A0A096XKT9|A0A096XKT9_RAT	23	5418	140.47	9	9	8536000	11	11	27	Y	68584	NADH-ubiquinone oxidoreductase chain 5 OS=Rattus norvegicus OX=10116 GN=ND5 PE=3 SV=1
tr|G3V7Y3|G3V7Y3_RAT	31	12	135.48	33	33	5030800	8	8	18	Y	17563	ATP synthase subunit delta, mitochondrial OS=Rattus norvegicus OX=10116 GN=Atp5f1d PE=1 SV=1
tr|Q5UAJ6|Q5UAJ6_RAT	24	24	133.46	32	32	6358700	14	14	26	Y	25942	Cytochrome c oxidase subunit 2 OS=Rattus norvegicus OX=10116 GN=COX2 PE=3 SV=1
Q561S0|NDUAA_RAT	18	5410	130.85	33	33	8793300	16	16	35	Y	40493	NADH dehydrogenase [ubiquinone] 1 alpha subcomplex subunit 10, mitochondrial OS=Rattus norvegicus OX=10116 GN=Ndufa10 PE=1 SV=1
tr|F1LXA0|F1LXA0_RAT	48	5458	126.04	17	17	5432200	3	3	8	N	17178	NADH dehydrogenase [ubiquinone] 1 alpha subcomplex subunit 12 OS=Rattus norvegicus OX=10116 GN=Ndufa12 PE=1 SV=2
tr|A0A411P2I9|A0A411P2I9_RAT	33	39	125.19	13	13	3117800	8	8	17	N	40144	Cytochrome b (Fragment) OS=Rattus norvegicus OX=10116 GN=Cytb PE=3 SV=1
tr|A0A0U2IDR8|A0A0U2IDR8_RAT	33	40	125.19	13	13	3117800	8	8	17	N	40981	Cytochrome b (Fragment) OS=Rattus norvegicus OX=10116 PE=3 SV=1
tr|A0A0U2M179|A0A0U2M179_RAT	33	41	125.19	13	13	3117800	8	8	17	N	41037	Cytochrome b (Fragment) OS=Rattus norvegicus OX=10116 PE=3 SV=1
tr|A0A411P2L0|A0A411P2L0_RAT	33	42	125.19	13	13	3117800	8	8	17	N	41017	Cytochrome b (Fragment) OS=Rattus norvegicus OX=10116 GN=Cytb PE=3 SV=1
tr|F8QU31|F8QU31_RAT	33	43	125.19	13	13	3117800	8	8	17	N	42181	Cytochrome b (Fragment) OS=Rattus norvegicus OX=10116 GN=cytb PE=3 SV=1
tr|A0A411P2K0|A0A411P2K0_RAT	33	44	125.19	13	13	3117800	8	8	17	N	42238	Cytochrome b (Fragment) OS=Rattus norvegicus OX=10116 GN=Cytb PE=3 SV=1
tr|L0L4L8|L0L4L8_RAT	33	45	125.19	12	12	3117800	8	8	17	N	42470	Cytochrome b (Fragment) OS=Rattus norvegicus OX=10116 GN=cytb PE=3 SV=1
tr|A0A140GE10|A0A140GE10_RAT	33	46	125.19	12	12	3117800	8	8	17	N	42574	Cytochrome b (Fragment) OS=Rattus norvegicus OX=10116 PE=3 SV=1
tr|A0A140GE11|A0A140GE11_RAT	33	47	125.19	12	12	3117800	8	8	17	N	42588	Cytochrome b (Fragment) OS=Rattus norvegicus OX=10116 PE=3 SV=1
tr|A0A140GE08|A0A140GE08_RAT	33	48	125.19	12	12	3117800	8	8	17	N	42527	Cytochrome b (Fragment) OS=Rattus norvegicus OX=10116 PE=3 SV=1
tr|A0A385HCC9|A0A385HCC9_RAT	33	49	125.19	12	12	3117800	8	8	17	N	42766	Cytochrome b (Fragment) OS=Rattus norvegicus OX=10116 PE=3 SV=1
tr|A0A3Q8AGE8|A0A3Q8AGE8_RAT	33	50	125.19	12	12	3117800	8	8	17	N	42712	Cytochrome b (Fragment) OS=Rattus norvegicus OX=10116 GN=Cytb PE=3 SV=1
tr|A0A3Q8AC68|A0A3Q8AC68_RAT	33	38	125.19	12	12	3117800	8	8	17	N	42622	Cytochrome b (Fragment) OS=Rattus norvegicus OX=10116 GN=Cytb PE=3 SV=1
tr|A0A3S6FK13|A0A3S6FK13_RAT	33	51	125.19	12	12	3117800	8	8	17	N	42702	Cytochrome b (Fragment) OS=Rattus norvegicus OX=10116 GN=Cytb PE=3 SV=1
tr|A0A3S6FM15|A0A3S6FM15_RAT	33	52	125.19	12	12	3117800	8	8	17	N	42698	Cytochrome b (Fragment) OS=Rattus norvegicus OX=10116 GN=Cytb PE=3 SV=1
tr|A0A097PE40|A0A097PE40_RAT	33	53	125.19	12	12	3117800	8	8	17	N	42865	Cytochrome b OS=Rattus norvegicus OX=10116 GN=CYTB PE=3 SV=1
tr|A0A220D9Z6|A0A220D9Z6_RAT	33	54	125.19	12	12	3117800	8	8	17	N	43018	Cytochrome b OS=Rattus norvegicus OX=10116 PE=3 SV=1
tr|D6NSP2|D6NSP2_RAT	33	55	125.19	12	12	3117800	8	8	17	N	42945	Cytochrome b (Fragment) OS=Rattus norvegicus OX=10116 GN=cytb PE=3 SV=1
tr|D6NSS6|D6NSS6_RAT	33	56	125.19	12	12	3117800	8	8	17	N	42993	Cytochrome b (Fragment) OS=Rattus norvegicus OX=10116 GN=cytb PE=3 SV=1
tr|D6NSQ3|D6NSQ3_RAT	33	57	125.19	12	12	3117800	8	8	17	N	43012	Cytochrome b (Fragment) OS=Rattus norvegicus OX=10116 GN=cytb PE=3 SV=1
tr|D6NSR3|D6NSR3_RAT	33	58	125.19	12	12	3117800	8	8	17	N	42986	Cytochrome b (Fragment) OS=Rattus norvegicus OX=10116 GN=cytb PE=3 SV=1
tr|D6NSP4|D6NSP4_RAT	33	59	125.19	12	12	3117800	8	8	17	N	43016	Cytochrome b (Fragment) OS=Rattus norvegicus OX=10116 GN=cytb PE=3 SV=1
tr|D6NSQ8|D6NSQ8_RAT	33	60	125.19	12	12	3117800	8	8	17	N	43016	Cytochrome b (Fragment) OS=Rattus norvegicus OX=10116 GN=cytb PE=3 SV=1
tr|D6NSR8|D6NSR8_RAT	33	61	125.19	12	12	3117800	8	8	17	N	42998	Cytochrome b (Fragment) OS=Rattus norvegicus OX=10116 GN=cytb PE=3 SV=1
tr|F2Q6S6|F2Q6S6_RAT	33	63	125.19	12	12	3117800	8	8	17	N	42938	Cytochrome b (Fragment) OS=Rattus norvegicus OX=10116 GN=cytb PE=3 SV=1
tr|A0A0A1FZ42|A0A0A1FZ42_RAT	33	64	125.19	12	12	3117800	8	8	17	N	42989	Cytochrome b OS=Rattus norvegicus OX=10116 GN=CYTB PE=3 SV=1
tr|D6NSS7|D6NSS7_RAT	33	65	125.19	12	12	3117800	8	8	17	N	42948	Cytochrome b (Fragment) OS=Rattus norvegicus OX=10116 GN=cytb PE=3 SV=1
tr|Q8SEY9|Q8SEY9_RAT	33	66	125.19	12	12	3117800	8	8	17	N	43015	Cytochrome b OS=Rattus norvegicus OX=10116 GN=cytb PE=3 SV=1
tr|D6NSR7|D6NSR7_RAT	33	67	125.19	12	12	3117800	8	8	17	N	42982	Cytochrome b (Fragment) OS=Rattus norvegicus OX=10116 GN=cytb PE=3 SV=1
tr|A0A220DA44|A0A220DA44_RAT	33	68	125.19	12	12	3117800	8	8	17	N	42968	Cytochrome b OS=Rattus norvegicus OX=10116 PE=3 SV=1
tr|F2Q6S5|F2Q6S5_RAT	33	69	125.19	12	12	3117800	8	8	17	N	42952	Cytochrome b (Fragment) OS=Rattus norvegicus OX=10116 GN=cytb PE=3 SV=1
tr|D6NSQ6|D6NSQ6_RAT	33	70	125.19	12	12	3117800	8	8	17	N	42952	Cytochrome b (Fragment) OS=Rattus norvegicus OX=10116 GN=cytb PE=3 SV=1
tr|D6NSQ0|D6NSQ0_RAT	33	71	125.19	12	12	3117800	8	8	17	N	42968	Cytochrome b (Fragment) OS=Rattus norvegicus OX=10116 GN=cytb PE=3 SV=1
tr|Q5UAI7|Q5UAI7_RAT	33	72	125.19	12	12	3117800	8	8	17	N	42998	Cytochrome b OS=Rattus norvegicus OX=10116 GN=CYTB PE=3 SV=1
tr|D6NSR2|D6NSR2_RAT	33	73	125.19	12	12	3117800	8	8	17	N	43073	Cytochrome b (Fragment) OS=Rattus norvegicus OX=10116 GN=cytb PE=3 SV=1
tr|A0A0S1Z1V9|A0A0S1Z1V9_RAT	33	74	125.19	12	12	3117800	8	8	17	N	43002	Cytochrome b OS=Rattus norvegicus OX=10116 GN=CYTB PE=3 SV=1
tr|D6NSR1|D6NSR1_RAT	33	75	125.19	12	12	3117800	8	8	17	N	43002	Cytochrome b (Fragment) OS=Rattus norvegicus OX=10116 GN=cytb PE=3 SV=1
tr|Q8HIC4|Q8HIC4_RAT	33	76	125.19	12	12	3117800	8	8	17	N	43012	Cytochrome b OS=Rattus norvegicus OX=10116 GN=Mt-cyb PE=3 SV=1
tr|A0A220DA02|A0A220DA02_RAT	33	77	125.19	12	12	3117800	8	8	17	N	42968	Cytochrome b OS=Rattus norvegicus OX=10116 PE=3 SV=1
tr|A0A0S1Z1V4|A0A0S1Z1V4_RAT	33	78	125.19	12	12	3117800	8	8	17	N	43016	Cytochrome b OS=Rattus norvegicus OX=10116 GN=CYTB PE=3 SV=1
tr|R9TKN1|R9TKN1_RAT	33	119	125.19	12	12	3117800	8	8	17	N	43012	Cytochrome b OS=Rattus norvegicus OX=10116 GN=CYTB PE=3 SV=1
P00159|CYB_RAT	33	79	125.19	12	12	3117800	8	8	17	N	43012	Cytochrome b OS=Rattus norvegicus OX=10116 GN=Mt-Cyb PE=3 SV=3
tr|L0N311|L0N311_RAT	33	80	125.19	12	12	3117800	8	8	17	N	43045	Cytochrome b (Fragment) OS=Rattus norvegicus OX=10116 GN=cytb PE=3 SV=1
tr|A0A220DA28|A0A220DA28_RAT	33	81	125.19	12	12	3117800	8	8	17	N	42970	Cytochrome b OS=Rattus norvegicus OX=10116 PE=3 SV=1
tr|H2KXA0|H2KXA0_RAT	33	82	125.19	12	12	3117800	8	8	17	N	42978	Cytochrome b (Fragment) OS=Rattus norvegicus OX=10116 GN=cytb PE=3 SV=1
tr|A0A096XNM4|A0A096XNM4_RAT	33	83	125.19	12	12	3117800	8	8	17	N	43042	Cytochrome b (Fragment) OS=Rattus norvegicus OX=10116 PE=3 SV=1
tr|D6NSP5|D6NSP5_RAT	33	120	125.19	12	12	3117800	8	8	17	N	43012	Cytochrome b (Fragment) OS=Rattus norvegicus OX=10116 GN=cytb PE=3 SV=1
P67779|PHB_RAT	32	5407	124.95	32	32	2115400	11	11	18	N	29820	Prohibitin OS=Rattus norvegicus OX=10116 GN=Phb PE=1 SV=1
Q06647|ATPO_RAT	22	8	124.51	26	26	7095700	10	10	30	N	23398	ATP synthase subunit O, mitochondrial OS=Rattus norvegicus OX=10116 GN=Atp5po PE=1 SV=1
P19511|AT5F1_RAT	12	10	124.23	17	17	27671000	10	10	49	N	28869	ATP synthase F(0) complex subunit B1, mitochondrial OS=Rattus norvegicus OX=10116 GN=Atp5pb PE=1 SV=1
Q6PDU7|ATP5L_RAT	19	11	122.89	39	39	6407800	9	9	33	Y	11433	ATP synthase subunit g, mitochondrial OS=Rattus norvegicus OX=10116 GN=Atp5mg PE=1 SV=2
P20788|UCRI_RAT	44	132	117.18	15	15	997010	5	5	9	N	29446	Cytochrome b-c1 complex subunit Rieske, mitochondrial OS=Rattus norvegicus OX=10116 GN=Uqcrfs1 PE=1 SV=2
P10817|CX6A2_RAT	54	151	116.98	14	14	1422000	3	3	6	N	10487	Cytochrome c oxidase subunit 6A2, mitochondrial (Fragment) OS=Rattus norvegicus OX=10116 GN=Cox6a2 PE=1 SV=3
tr|G3V8M4|G3V8M4_RAT	54	152	116.98	13	13	1422000	3	3	6	N	10802	Cytochrome c oxidase subunit 6A, mitochondrial OS=Rattus norvegicus OX=10116 GN=Cox6a2 PE=3 SV=1
tr|D3ZE15|D3ZE15_RAT	39	5447	112.42	26	26	1490000	8	8	11	N	16777	NADH:ubiquinone oxidoreductase subunit A13 OS=Rattus norvegicus OX=10116 GN=Ndufa13 PE=1 SV=1
tr|B5DEL8|B5DEL8_RAT	37	5442	111.74	17	17	3348400	3	3	12	N	12700	NADH dehydrogenase (Ubiquinone) Fe-S protein 5 OS=Rattus norvegicus OX=10116 GN=Ndufs5 PE=1 SV=1
tr|A0A0G2JZJ9|A0A0G2JZJ9_RAT	37	5443	111.74	17	17	3348400	3	3	12	N	12730	Uncharacterized protein OS=Rattus norvegicus OX=10116 PE=4 SV=1
Q63362|NDUA5_RAT	45	5439	111.71	20	20	1791600	4	4	9	N	13412	NADH dehydrogenase [ubiquinone] 1 alpha subcomplex subunit 5 OS=Rattus norvegicus OX=10116 GN=Ndufa5 PE=1 SV=3
tr|A9UMW2|A9UMW2_RAT	43	5453	104.79	34	34	7056100	7	7	9	Y	9255	Ndufa3 protein (Fragment) OS=Rattus norvegicus OX=10116 GN=Ndufa3 PE=2 SV=1
tr|M0RB63|M0RB63_RAT	43	5454	104.79	33	33	7056100	7	7	9	Y	9372	RCG63041 OS=Rattus norvegicus OX=10116 GN=LOC684509 PE=4 SV=1
tr|A0A0G2KAA3|A0A0G2KAA3_RAT	43	5455	104.79	31	31	7056100	7	7	9	Y	10170	NADH:ubiquinone oxidoreductase subunit A3 OS=Rattus norvegicus OX=10116 GN=Ndufa3 PE=1 SV=1
tr|A0A0G2KB63|A0A0G2KB63_RAT	34	5422	102.71	13	13	3542500	5	5	15	N	33168	Prohibitin OS=Rattus norvegicus OX=10116 GN=Phb2 PE=1 SV=1
Q5XIH7|PHB2_RAT	34	5423	102.71	13	13	3542500	5	5	15	N	33312	Prohibitin-2 OS=Rattus norvegicus OX=10116 GN=Phb2 PE=1 SV=1
tr|F1LPG5|F1LPG5_RAT	63	5445	101.71	19	19	560640	3	3	4	N	15064	NADH:ubiquinone oxidoreductase subunit B4 OS=Rattus norvegicus OX=10116 GN=Ndufb4 PE=1 SV=1
Q64428|ECHA_RAT	42	9	96.05	6	6	1180300	7	7	10	N	82665	Trifunctional enzyme subunit alpha, mitochondrial OS=Rattus norvegicus OX=10116 GN=Hadha PE=1 SV=2
tr|D3ZS58|D3ZS58_RAT	41	5449	91.1	23	23	1593600	3	3	11	N	10845	NADH dehydrogenase [ubiquinone] 1 alpha subcomplex subunit 2 OS=Rattus norvegicus OX=10116 GN=Ndufa2 PE=1 SV=1
tr|Q5RJN0|Q5RJN0_RAT	35	564	89.03	15	15	2707400	4	4	13	Y	23945	NADH dehydrogenase (Ubiquinone) Fe-S protein 7 OS=Rattus norvegicus OX=10116 GN=Ndufs7 PE=1 SV=1
tr|D3ZZ21|D3ZZ21_RAT	40	5448	86.16	26	26	1908900	4	4	11	Y	15638	NADH dehydrogenase (Ubiquinone) 1 beta subcomplex, 6 (Predicted) OS=Rattus norvegicus OX=10116 GN=Ndufb6 PE=1 SV=1
tr|Q5UAJ5|Q5UAJ5_RAT	46	32	80.38	19	19	7031700	3	3	9	Y	7642	ATP synthase protein 8 OS=Rattus norvegicus OX=10116 GN=ATP8 PE=3 SV=1
P11608|ATP8_RAT	46	35	80.38	19	19	7031700	3	3	9	Y	7630	ATP synthase protein 8 OS=Rattus norvegicus OX=10116 GN=Mt-atp8 PE=1 SV=2
tr|Q8SEZ4|Q8SEZ4_RAT	46	33	80.38	19	19	7031700	3	3	9	Y	7632	ATP synthase protein 8 OS=Rattus norvegicus OX=10116 GN=ATPase8 PE=3 SV=1
tr|Q8HIC8|Q8HIC8_RAT	46	36	80.38	19	19	7031700	3	3	9	Y	7630	ATP synthase protein 8 OS=Rattus norvegicus OX=10116 GN=Mt-atp8 PE=3 SV=1
Q9ER34|ACON_RAT	59	88	78.75	4	4	649530	3	3	5	N	85433	Aconitate hydratase, mitochondrial OS=Rattus norvegicus OX=10116 GN=Aco2 PE=1 SV=2
Q02253|MMSA_RAT	53	2801	77.13	8	8	1358900	5	5	6	Y	57808	Methylmalonate-semialdehyde dehydrogenase [acylating], mitochondrial OS=Rattus norvegicus OX=10116 GN=Aldh6a1 PE=1 SV=1
tr|G3V7J0|G3V7J0_RAT	53	2802	77.13	8	8	1358900	5	5	6	Y	57748	Aldehyde dehydrogenase family 6, subfamily A1, isoform CRA_b OS=Rattus norvegicus OX=10116 GN=Aldh6a1 PE=1 SV=1
tr|A9UMV9|A9UMV9_RAT	55	5450	76.99	21	21	1509700	3	3	6	N	12500	NADH:ubiquinone oxidoreductase subunit A7 OS=Rattus norvegicus OX=10116 GN=Ndufa7 PE=1 SV=1
Q5XIF3|NDUS4_RAT	51	5457	75.88	12	12	973700	5	5	7	N	19741	NADH dehydrogenase [ubiquinone] iron-sulfur protein 4, mitochondrial OS=Rattus norvegicus OX=10116 GN=Ndufs4 PE=1 SV=1
P80432|COX7C_RAT	65	134	71.8	21	21	321550	2	2	4	N	7375	Cytochrome c oxidase subunit 7C, mitochondrial OS=Rattus norvegicus OX=10116 GN=Cox7c PE=1 SV=2
tr|Q8SEZ8|Q8SEZ8_RAT	38	671	68.86	6	6	2854700	5	5	11	N	36133	NADH-ubiquinone oxidoreductase chain 1 (Fragment) OS=Rattus norvegicus OX=10116 GN=NADH1 PE=3 SV=1
P03889|NU1M_RAT	38	672	68.86	6	6	2854700	5	5	11	N	36145	NADH-ubiquinone oxidoreductase chain 1 OS=Rattus norvegicus OX=10116 GN=Mtnd1 PE=1 SV=3
tr|Q8HID1|Q8HID1_RAT	38	673	68.86	6	6	2854700	5	5	11	N	36145	NADH-ubiquinone oxidoreductase chain 1 OS=Rattus norvegicus OX=10116 GN=Mt-nd1 PE=3 SV=1
tr|D2E6L7|D2E6L7_RAT	38	5456	68.86	6	6	2854700	5	5	11	N	36062	NADH-ubiquinone oxidoreductase chain 1 OS=Rattus norvegicus OX=10116 GN=ND1 PE=3 SV=1
P10888|COX41_RAT	47	290	68.37	12	12	2010600	3	3	8	N	19515	Cytochrome c oxidase subunit 4 isoform 1, mitochondrial OS=Rattus norvegicus OX=10116 GN=Cox4i1 PE=1 SV=1
Q6AXV4|SAM50_RAT	72	2803	64.55	4	4	240260	2	2	3	N	51960	Sorting and assembly machinery component 50 homolog OS=Rattus norvegicus OX=10116 GN=Samm50 PE=1 SV=1
P17764|THIL_RAT	61	2787	62.78	8	8	1100400	3	3	4	N	44695	Acetyl-CoA acetyltransferase, mitochondrial OS=Rattus norvegicus OX=10116 GN=Acat1 PE=1 SV=1
Q60587|ECHB_RAT	58	20	62.75	7	7	432720	4	4	5	N	51414	Trifunctional enzyme subunit beta, mitochondrial OS=Rattus norvegicus OX=10116 GN=Hadhb PE=1 SV=1
tr|D4A3V2|D4A3V2_RAT	88	5424	61.72	8	8	262320	2	2	2	N	15224	NADH dehydrogenase [ubiquinone] 1 alpha subcomplex subunit 6 OS=Rattus norvegicus OX=10116 GN=Ndufa6 PE=1 SV=1
P12075|COX5B_RAT	52	139	61.53	11	11	3573300	3	3	7	N	13915	Cytochrome c oxidase subunit 5B, mitochondrial OS=Rattus norvegicus OX=10116 GN=Cox5b PE=1 SV=2
tr|A0A0A1G491|A0A0A1G491_RAT	50	1300	57.87	10	10	721790	4	4	7	N	38542	NADH-ubiquinone oxidoreductase chain 2 OS=Rattus norvegicus OX=10116 GN=ND2 PE=3 SV=1
tr|Q5UAJ8|Q5UAJ8_RAT	50	1301	57.87	10	10	721790	4	4	7	N	38455	NADH-ubiquinone oxidoreductase chain 2 OS=Rattus norvegicus OX=10116 GN=ND2 PE=3 SV=1
tr|A0A0G2JVH4|A0A0G2JVH4_RAT	71	147	57.78	2	2	73134	2	2	3	N	86230	MICOS complex subunit MIC60 OS=Rattus norvegicus OX=10116 GN=Immt PE=1 SV=1
tr|A0A140TAG5|A0A140TAG5_RAT	71	145	57.78	2	2	73134	2	2	3	N	67049	MICOS complex subunit MIC60 OS=Rattus norvegicus OX=10116 GN=Immt PE=1 SV=1
Q3KR86|MIC60_RAT	71	146	57.78	2	2	73134	2	2	3	N	67177	MICOS complex subunit Mic60 (Fragment) OS=Rattus norvegicus OX=10116 GN=Immt PE=1 SV=1
tr|D4A3E8|D4A3E8_RAT	74	7776	55.17	3	3	238180	1	1	3	N	47648	Mitochondrial ribosomal protein S27 OS=Rattus norvegicus OX=10116 GN=Mrps27 PE=1 SV=1
tr|D3ZCZ9|D3ZCZ9_RAT	57	5435	52.17	21	21	1520800	2	2	5	N	13040	NADH dehydrogenase [ubiquinone] iron-sulfur protein 6, mitochondrial OS=Rattus norvegicus OX=10116 GN=LOC100912599 PE=1 SV=1
P02563|MYH6_RAT	60	196	51.56	1	1	2297500	3	3	4	Y	223506	Myosin-6 OS=Rattus norvegicus OX=10116 GN=Myh6 PE=1 SV=2
tr|Q7H115|Q7H115_RAT	66	2862	49.12	3	3	151450	1	1	4	N	29871	Cytochrome c oxidase subunit 3 OS=Rattus norvegicus OX=10116 GN=Mt-co3 PE=3 SV=1
tr|I6V4L9|I6V4L9_RAT	66	2863	49.12	3	3	151450	1	1	4	N	29844	Cytochrome c oxidase subunit 3 OS=Rattus norvegicus OX=10116 GN=COX3 PE=3 SV=1
tr|Q8M7G4|Q8M7G4_RAT	66	2864	49.12	3	3	151450	1	1	4	N	29861	Cytochrome c oxidase subunit 3 OS=Rattus norvegicus OX=10116 PE=2 SV=1
tr|A0A096XKT2|A0A096XKT2_RAT	66	2865	49.12	3	3	151450	1	1	4	N	29901	Cytochrome c oxidase subunit 3 OS=Rattus norvegicus OX=10116 GN=COX3 PE=3 SV=1
P05505|COX3_RAT	66	2866	49.12	3	3	151450	1	1	4	N	29871	Cytochrome c oxidase subunit 3 OS=Rattus norvegicus OX=10116 GN=Mtco3 PE=1 SV=5
tr|Q8SEZ2|Q8SEZ2_RAT	66	2867	49.12	3	3	151450	1	1	4	N	29870	Cytochrome c oxidase subunit 3 (Fragment) OS=Rattus norvegicus OX=10116 GN=COIII PE=3 SV=1
tr|Q8M7G5|Q8M7G5_RAT	49	13	47.43	8	8	976850	2	2	7	Y	24240	ATP synthase subunit a (Fragment) OS=Rattus norvegicus OX=10116 PE=2 SV=1
P05504|ATP6_RAT	49	15	47.43	8	8	976850	2	2	7	Y	25076	ATP synthase subunit a OS=Rattus norvegicus OX=10116 GN=Mt-atp6 PE=1 SV=3
tr|Q8HIC7|Q8HIC7_RAT	49	16	47.43	8	8	976850	2	2	7	Y	25076	ATP synthase subunit a OS=Rattus norvegicus OX=10116 GN=Mt-atp6 PE=4 SV=1
tr|S5S1E9|S5S1E9_RAT	49	17	47.43	8	8	976850	2	2	7	Y	25049	ATP synthase subunit a OS=Rattus norvegicus OX=10116 GN=ATP6 PE=4 SV=1
tr|Q8SEZ3|Q8SEZ3_RAT	49	23	47.43	8	8	976850	2	2	7	Y	25030	ATP synthase subunit a OS=Rattus norvegicus OX=10116 GN=ATPase6 PE=4 SV=1
tr|Q549I0|Q549I0_RAT	49	14	47.43	8	8	976850	2	2	7	Y	25050	ATP synthase subunit a OS=Rattus norvegicus OX=10116 GN=atp6 PE=4 SV=1
tr|B2RYW3|B2RYW3_RAT	56	5441	45.99	7	7	1041600	1	1	5	Y	21892	NADH dehydrogenase (Ubiquinone) 1 beta subcomplex, 9 OS=Rattus norvegicus OX=10116 GN=Ndufb9 PE=1 SV=1
tr|Q35733|Q35733_RAT	75	5460	45.67	13	13	277810	1	1	3	N	8389	NADH-ubiquinone oxidoreductase chain 6 (Fragment) OS=Rattus norvegicus OX=10116 PE=3 SV=1
tr|Q06QD9|Q06QD9_RAT	75	5461	45.67	6	6	277810	1	1	3	N	18943	NADH-ubiquinone oxidoreductase chain 6 OS=Rattus norvegicus OX=10116 GN=ND6 PE=3 SV=1
tr|Q7HKW2|Q7HKW2_RAT	75	5462	45.67	6	6	277810	1	1	3	N	18957	NADH-ubiquinone oxidoreductase chain 6 OS=Rattus norvegicus OX=10116 GN=NADH6 PE=3 SV=1
Q63704|CPT1B_RAT	122	138	44.17	2	2	172350	1	1	1	N	88217	Carnitine O-palmitoyltransferase 1, muscle isoform OS=Rattus norvegicus OX=10116 GN=Cpt1b PE=1 SV=1
P21571|ATP5J_RAT	123	30	39.99	10	10	171430	1	1	1	N	12494	ATP synthase-coupling factor 6, mitochondrial OS=Rattus norvegicus OX=10116 GN=Atp5pf PE=1 SV=1
tr|Q06QA9|Q06QA9_RAT	87	2790	37.15	3	3	105120	2	2	2	N	56893	Cytochrome c oxidase subunit 1 OS=Rattus norvegicus OX=10116 GN=CO1 PE=3 SV=1
tr|Q06QK0|Q06QK0_RAT	87	2791	37.15	3	3	105120	2	2	2	N	56880	Cytochrome c oxidase subunit 1 OS=Rattus norvegicus OX=10116 GN=CO1 PE=3 SV=1
tr|Q8SEZ6|Q8SEZ6_RAT	87	2792	37.15	3	3	105120	2	2	2	N	56879	Cytochrome c oxidase subunit 1 OS=Rattus norvegicus OX=10116 GN=COI PE=3 SV=1
tr|A0A0A1FZ34|A0A0A1FZ34_RAT	87	2793	37.15	3	3	105120	2	2	2	N	56937	Cytochrome c oxidase subunit 1 OS=Rattus norvegicus OX=10116 GN=COX1 PE=3 SV=1
tr|Q8HIC9|Q8HIC9_RAT	87	2794	37.15	3	3	105120	2	2	2	N	56845	Cytochrome c oxidase subunit 1 OS=Rattus norvegicus OX=10116 GN=Mt-co1 PE=3 SV=1
P05503|COX1_RAT	87	2795	37.15	3	3	105120	2	2	2	N	56845	Cytochrome c oxidase subunit 1 OS=Rattus norvegicus OX=10116 GN=Mtco1 PE=2 SV=3
tr|Q95938|Q95938_RAT	87	2796	37.15	3	3	105120	2	2	2	N	56977	Cytochrome c oxidase subunit 1 OS=Rattus norvegicus OX=10116 GN=Co I PE=3 SV=1
tr|B2RZ24|B2RZ24_RAT	124	2877	36.39	4	4	75060	1	1	1	N	47388	Succinate-CoA ligase subunit beta (Fragment) OS=Rattus norvegicus OX=10116 GN=Sucla2 PE=2 SV=1
tr|F1LM47|F1LM47_RAT	124	2878	36.39	4	4	75060	1	1	1	N	50306	Succinate--CoA ligase [ADP-forming] subunit beta, mitochondrial OS=Rattus norvegicus OX=10116 GN=Sucla2 PE=1 SV=1
Q5M9I5|QCR6_RAT	73	2875	34.79	17	17	314440	3	3	3	N	10424	Cytochrome b-c1 complex subunit 6, mitochondrial OS=Rattus norvegicus OX=10116 GN=Uqcrh PE=3 SV=1
Q9JJW3|ATPMD_RAT	125	89	33.84	21	21	548650	1	1	1	N	6408	ATP synthase membrane subunit DAPIT, mitochondrial OS=Rattus norvegicus OX=10116 GN=Atp5md PE=1 SV=1
tr|D4A4P3|D4A4P3_RAT	64	5451	30.36	15	15	726610	2	2	4	N	11267	NADH:ubiquinone oxidoreductase subunit B3 OS=Rattus norvegicus OX=10116 GN=Ndufb3 PE=1 SV=1
Q9R063|PRDX5_RAT	126	10115	28.58	6	6	91401	1	1	1	N	22179	Peroxiredoxin-5, mitochondrial OS=Rattus norvegicus OX=10116 GN=Prdx5 PE=1 SV=1
tr|A0A0G2JSS8|A0A0G2JSS8_RAT	126	10116	28.58	6	6	91401	1	1	1	N	22207	Peroxiredoxin OS=Rattus norvegicus OX=10116 GN=Prdx5 PE=1 SV=1
tr|B2RZD6|B2RZD6_RAT	103	568	28.49	9	9	46814	1	1	1	N	9327	NDUFA4, mitochondrial complex-associated OS=Rattus norvegicus OX=10116 GN=Ndufa4 PE=1 SV=1
P05508|NU4M_RAT	62	5425	26.36	2	2	362850	1	1	4	N	51783	NADH-ubiquinone oxidoreductase chain 4 OS=Rattus norvegicus OX=10116 GN=Mtnd4 PE=3 SV=3
tr|D2E6K0|D2E6K0_RAT	62	5426	26.36	2	2	362850	1	1	4	N	51833	NADH-ubiquinone oxidoreductase chain 4 OS=Rattus norvegicus OX=10116 GN=ND4 PE=3 SV=1
tr|A7XYB9|A7XYB9_RAT	62	5427	26.36	2	2	362850	1	1	4	N	51773	NADH-ubiquinone oxidoreductase chain 4 OS=Rattus norvegicus OX=10116 GN=Nd4 PE=3 SV=1
tr|Q06QE1|Q06QE1_RAT	62	5428	26.36	2	2	362850	1	1	4	N	51851	NADH-ubiquinone oxidoreductase chain 4 OS=Rattus norvegicus OX=10116 GN=ND4 PE=3 SV=1
tr|Q06QA2|Q06QA2_RAT	62	5429	26.36	2	2	362850	1	1	4	N	51787	NADH-ubiquinone oxidoreductase chain 4 OS=Rattus norvegicus OX=10116 GN=ND4 PE=3 SV=1
tr|Q7HKW3|Q7HKW3_RAT	62	5430	26.36	2	2	362850	1	1	4	N	51801	NADH-ubiquinone oxidoreductase chain 4 (Fragment) OS=Rattus norvegicus OX=10116 GN=NADH4 PE=3 SV=1
tr|Q06QG7|Q06QG7_RAT	62	5431	26.36	2	2	362850	1	1	4	N	51791	NADH-ubiquinone oxidoreductase chain 4 OS=Rattus norvegicus OX=10116 GN=ND4 PE=3 SV=1
tr|Q06Q89|Q06Q89_RAT	62	5432	26.36	2	2	362850	1	1	4	N	51819	NADH-ubiquinone oxidoreductase chain 4 OS=Rattus norvegicus OX=10116 GN=ND4 PE=3 SV=1
tr|Q35737|Q35737_RAT	62	5433	26.36	2	2	362850	1	1	4	N	51765	NADH-ubiquinone oxidoreductase chain 4 OS=Rattus norvegicus OX=10116 PE=3 SV=1
tr|Q8HIC6|Q8HIC6_RAT	62	5434	26.36	2	2	362850	1	1	4	N	51783	NADH-ubiquinone oxidoreductase chain 4 OS=Rattus norvegicus OX=10116 GN=Mt-nd4 PE=3 SV=1
Q5M934|TRUB1_RAT	36	284	25.68	2	2	2626900	1	1	12	N	36404	Probable tRNA pseudouridine synthase 1 OS=Rattus norvegicus OX=10116 GN=Trub1 PE=2 SV=1
D4A2Z8|DHX36_RAT	129	7802	25.53	1	1	1590500	1	1	1	N	113843	ATP-dependent DNA/RNA helicase DHX36 OS=Rattus norvegicus OX=10116 GN=Dhx36 PE=1 SV=1
tr|B2RYU0|B2RYU0_RAT	108	5486	24.58	9	9	365080	1	1	1	N	11842	NADH dehydrogenase (Ubiquinone) 1 beta subcomplex, 2 (Predicted), isoform CRA_b OS=Rattus norvegicus OX=10116 GN=Ndufb2 PE=1 SV=1
P80431|COX7B_RAT	130	2798	23.83	14	14	92435	1	1	1	N	8995	Cytochrome c oxidase subunit 7B, mitochondrial OS=Rattus norvegicus OX=10116 GN=Cox7b PE=1 SV=3
tr|A0A0G2K6P0|A0A0G2K6P0_RAT	130	2860	23.83	14	14	92435	1	1	1	N	9070	Cytochrome c oxidase subunit 7B2 OS=Rattus norvegicus OX=10116 GN=Cox7b2 PE=4 SV=1
P13086|SUCA_RAT	109	2822	44400	3	3	0	1	1	1	Y	36148	Succinate--CoA ligase [ADP/GDP-forming] subunit alpha, mitochondrial OS=Rattus norvegicus OX=10116 GN=Suclg1 PE=2 SV=2
tr|A0A0H2UHE1|A0A0H2UHE1_RAT	109	2823	44400	3	3	0	1	1	1	Y	37560	Succinate--CoA ligase [ADP/GDP-forming] subunit alpha, mitochondrial OS=Rattus norvegicus OX=10116 GN=Suclg1 PE=1 SV=1
Q8VIJ5|OGA_RAT	82	207	44250	1	1	242720	1	1	2	N	102918	Protein O-GlcNAcase OS=Rattus norvegicus OX=10116 GN=Oga PE=1 SV=1
P52631|STAT3_RAT	81	5489	21.55	1	1	126710	1	1	2	N	88040	Signal transducer and activator of transcription 3 OS=Rattus norvegicus OX=10116 GN=Stat3 PE=1 SV=1
P35171|CX7A2_RAT	132	1062	21.25	12	12	44810	1	1	1	N	9353	Cytochrome c oxidase subunit 7A2, mitochondrial OS=Rattus norvegicus OX=10116 GN=Cox7a2 PE=1 SV=1
tr|B2RYS0|B2RYS0_RAT	132	1063	21.25	12	12	44810	1	1	1	N	9353	Cox7a2 protein OS=Rattus norvegicus OX=10116 GN=Cox7a2 PE=2 SV=1
tr|A0A0G2JYU2|A0A0G2JYU2_RAT	84	2830	20.89	4	4	268290	1	1	2	N	20750	Mitochondrial ribosomal protein L11 OS=Rattus norvegicus OX=10116 GN=mrpl11 PE=1 SV=1
Q5XIE3|RM11_RAT	84	2831	20.89	4	4	268290	1	1	2	N	22420	39S ribosomal protein L11, mitochondrial OS=Rattus norvegicus OX=10116 GN=Mrpl11 PE=2 SV=1
tr|Q6P9Y4|Q6P9Y4_RAT	95	1009	20.32	3	3	127850	1	1	1	N	32904	ADP/ATP translocase 1 OS=Rattus norvegicus OX=10116 GN=Slc25a4 PE=1 SV=1
Q05962|ADT1_RAT	95	1010	20.32	3	3	127850	1	1	1	N	32989	ADP/ATP translocase 1 OS=Rattus norvegicus OX=10116 GN=Slc25a4 PE=1 SV=3
Q09073|ADT2_RAT	95	1011	20.32	3	3	127850	1	1	1	N	32901	ADP/ATP translocase 2 OS=Rattus norvegicus OX=10116 GN=Slc25a5 PE=1 SV=3
tr|D3ZB81|D3ZB81_RAT	95	1012	20.32	2	2	127850	1	1	1	N	35227	Solute carrier family 25 member 31 OS=Rattus norvegicus OX=10116 GN=Slc25a31 PE=3 SV=3
tr|A0A1W2Q605|A0A1W2Q605_RAT	95	1008	20.32	7	7	127850	1	1	1	N	13534	Solute carrier family 25 member 31 (Fragment) OS=Rattus norvegicus OX=10116 GN=Slc25a31 PE=3 SV=1

## Sheet: Monomer
Accession	Protein Group	Protein ID	-10lgP	Coverage (%)	Coverage (%) Sample 8	Area Sample 8	#Peptides	#Unique	#Spec Sample 8	PTM	Avg. Mass	Description
P10719|ATPB_RAT	2	1	387.46	60	60	1157500000	170	170	874	Y	56354	ATP synthase subunit beta, mitochondrial OS=Rattus norvegicus OX=10116 GN=Atp5f1b PE=1 SV=2
tr|G3V6D3|G3V6D3_RAT	2	2	387.46	60	60	1157500000	170	170	874	Y	56345	ATP synthase subunit beta OS=Rattus norvegicus OX=10116 GN=Atp5f1b PE=1 SV=1
P15999|ATPA_RAT	1	3	338.57	58	58	716370000	168	166	907	Y	59754	ATP synthase subunit alpha, mitochondrial OS=Rattus norvegicus OX=10116 GN=Atp5f1a PE=1 SV=2
tr|F1LP05|F1LP05_RAT	1	4	338.57	58	58	716370000	168	166	907	Y	59813	ATP synthase subunit alpha OS=Rattus norvegicus OX=10116 GN=Atp5f1a PE=1 SV=1
P35435|ATPG_RAT	3	5	280.45	43	43	102670000	46	46	221	Y	30191	ATP synthase subunit gamma, mitochondrial OS=Rattus norvegicus OX=10116 GN=Atp5f1c PE=1 SV=2
tr|Q6QI09|Q6QI09_RAT	3	6	280.45	19	19	102670000	46	46	221	Y	67721	ATP synthase subunit gamma, mitochondrial OS=Rattus norvegicus OX=10116 GN=Taf3 PE=1 SV=1
P31399|ATP5H_RAT	4	7	278.21	65	65	85852000	41	40	154	Y	18763	ATP synthase subunit d, mitochondrial OS=Rattus norvegicus OX=10116 GN=Atp5pd PE=1 SV=3
Q6PDU7|ATP5L_RAT	6	11	171.31	45	45	22118000	19	19	67	Y	11433	ATP synthase subunit g, mitochondrial OS=Rattus norvegicus OX=10116 GN=Atp5mg PE=1 SV=2
P19511|AT5F1_RAT	7	10	167.95	23	23	85675000	21	21	64	Y	28869	ATP synthase F(0) complex subunit B1, mitochondrial OS=Rattus norvegicus OX=10116 GN=Atp5pb PE=1 SV=1
tr|G3V7Y3|G3V7Y3_RAT	8	12	162.91	33	33	18902000	13	13	47	Y	17563	ATP synthase subunit delta, mitochondrial OS=Rattus norvegicus OX=10116 GN=Atp5f1d PE=1 SV=1
Q06647|ATPO_RAT	5	8	159.85	38	38	30283000	21	21	71	Y	23398	ATP synthase subunit O, mitochondrial OS=Rattus norvegicus OX=10116 GN=Atp5po PE=1 SV=1
P21571|ATP5J_RAT	10	30	159.19	39	39	4939200	10	10	25	N	12494	ATP synthase-coupling factor 6, mitochondrial OS=Rattus norvegicus OX=10116 GN=Atp5pf PE=1 SV=1
tr|Q5UAJ5|Q5UAJ5_RAT	9	32	134.38	48	48	45606000	8	8	32	Y	7642	ATP synthase protein 8 OS=Rattus norvegicus OX=10116 GN=ATP8 PE=3 SV=1
tr|Q8SEZ4|Q8SEZ4_RAT	9	33	134.38	48	48	45606000	8	8	32	Y	7632	ATP synthase protein 8 OS=Rattus norvegicus OX=10116 GN=ATPase8 PE=3 SV=1
Q64428|ECHA_RAT	12	9	127.39	8	8	3637100	11	11	21	N	82665	Trifunctional enzyme subunit alpha, mitochondrial OS=Rattus norvegicus OX=10116 GN=Hadha PE=1 SV=2
P00507|AATM_RAT	15	19	126.2	12	12	2748600	7	7	16	Y	47314	Aspartate aminotransferase, mitochondrial OS=Rattus norvegicus OX=10116 GN=Got2 PE=1 SV=2
Q60587|ECHB_RAT	13	20	115.62	15	15	2834100	11	11	19	N	51414	Trifunctional enzyme subunit beta, mitochondrial OS=Rattus norvegicus OX=10116 GN=Hadhb PE=1 SV=1
tr|A0A0G2K330|A0A0G2K330_RAT	13	21	115.62	15	15	2834100	11	11	19	N	52568	Trifunctional enzyme subunit beta, mitochondrial OS=Rattus norvegicus OX=10116 GN=Hadhb PE=1 SV=1
tr|D3ZFQ8|D3ZFQ8_RAT	21	133	93.16	5	5	1386800	2	2	6	N	35435	Cytochrome c-1 OS=Rattus norvegicus OX=10116 GN=Cyc1 PE=1 SV=3
P29419|ATP5I_RAT	14	31	91.6	49	49	2316400	6	6	17	N	8255	ATP synthase subunit e, mitochondrial OS=Rattus norvegicus OX=10116 GN=Atp5me PE=1 SV=3
tr|Q8M7G5|Q8M7G5_RAT	11	13	90.42	27	27	3492600	8	8	22	Y	24240	ATP synthase subunit a (Fragment) OS=Rattus norvegicus OX=10116 PE=2 SV=1
tr|Q549I0|Q549I0_RAT	11	14	90.42	27	27	3492600	8	8	22	Y	25050	ATP synthase subunit a OS=Rattus norvegicus OX=10116 GN=atp6 PE=4 SV=1
P05504|ATP6_RAT	11	15	90.42	27	27	3492600	8	8	22	Y	25076	ATP synthase subunit a OS=Rattus norvegicus OX=10116 GN=Mt-atp6 PE=1 SV=3
tr|Q8HIC7|Q8HIC7_RAT	11	16	90.42	27	27	3492600	8	8	22	Y	25076	ATP synthase subunit a OS=Rattus norvegicus OX=10116 GN=Mt-atp6 PE=4 SV=1
tr|S5S1E9|S5S1E9_RAT	11	17	90.42	27	27	3492600	8	8	22	Y	25049	ATP synthase subunit a OS=Rattus norvegicus OX=10116 GN=ATP6 PE=4 SV=1
P11240|COX5A_RAT	19	86	82.98	16	16	571600	3	3	6	N	16130	Cytochrome c oxidase subunit 5A, mitochondrial OS=Rattus norvegicus OX=10116 GN=Cox5a PE=1 SV=1
P20788|UCRI_RAT	75	132	74.5	5	5	276840	1	1	1	N	29446	Cytochrome b-c1 complex subunit Rieske, mitochondrial OS=Rattus norvegicus OX=10116 GN=Uqcrfs1 PE=1 SV=2
tr|Q5UAJ6|Q5UAJ6_RAT	16	24	69.65	17	17	843160	5	5	6	Y	25942	Cytochrome c oxidase subunit 2 OS=Rattus norvegicus OX=10116 GN=COX2 PE=3 SV=1
tr|S5RZM8|S5RZM8_RAT	16	26	69.65	17	17	843160	5	5	6	Y	25958	Cytochrome c oxidase subunit 2 OS=Rattus norvegicus OX=10116 GN=COX2 PE=3 SV=1
P00406|COX2_RAT	16	27	69.65	17	17	843160	5	5	6	Y	25928	Cytochrome c oxidase subunit 2 OS=Rattus norvegicus OX=10116 GN=Mtco2 PE=1 SV=3
tr|Q8SEZ5|Q8SEZ5_RAT	16	28	69.65	17	17	843160	5	5	6	Y	25928	Cytochrome c oxidase subunit 2 OS=Rattus norvegicus OX=10116 GN=Mt-co2 PE=1 SV=1
tr|A0A097PE04|A0A097PE04_RAT	16	29	69.65	17	17	843160	5	5	6	Y	25894	Cytochrome c oxidase subunit 2 OS=Rattus norvegicus OX=10116 GN=COX2 PE=3 SV=1
P09605|KCRS_RAT	34	84	63.37	6	6	412600	2	2	2	Y	47385	Creatine kinase S-type, mitochondrial OS=Rattus norvegicus OX=10116 GN=Ckmt2 PE=1 SV=2
P32551|QCR2_RAT	17	34	63.27	8	8	1024500	4	4	6	N	48396	Cytochrome b-c1 complex subunit 2, mitochondrial OS=Rattus norvegicus OX=10116 GN=Uqcrc2 PE=1 SV=2
Q9ER34|ACON_RAT	25	88	60.11	3	3	552340	2	2	3	N	85433	Aconitate hydratase, mitochondrial OS=Rattus norvegicus OX=10116 GN=Aco2 PE=1 SV=2
P80432|COX7C_RAT	76	134	57.04	21	21	152490	1	1	1	N	7375	Cytochrome c oxidase subunit 7C, mitochondrial OS=Rattus norvegicus OX=10116 GN=Cox7c PE=1 SV=2
tr|A0A3Q8AC68|A0A3Q8AC68_RAT	18	38	51.39	8	8	1491900	3	3	6	N	42622	Cytochrome b (Fragment) OS=Rattus norvegicus OX=10116 GN=Cytb PE=3 SV=1
tr|A0A411P2I9|A0A411P2I9_RAT	18	39	51.39	8	8	1491900	3	3	6	N	40144	Cytochrome b (Fragment) OS=Rattus norvegicus OX=10116 GN=Cytb PE=3 SV=1
tr|A0A0U2IDR8|A0A0U2IDR8_RAT	18	40	51.39	8	8	1491900	3	3	6	N	40981	Cytochrome b (Fragment) OS=Rattus norvegicus OX=10116 PE=3 SV=1
tr|A0A0U2M179|A0A0U2M179_RAT	18	41	51.39	8	8	1491900	3	3	6	N	41037	Cytochrome b (Fragment) OS=Rattus norvegicus OX=10116 PE=3 SV=1
tr|A0A411P2L0|A0A411P2L0_RAT	18	42	51.39	8	8	1491900	3	3	6	N	41017	Cytochrome b (Fragment) OS=Rattus norvegicus OX=10116 GN=Cytb PE=3 SV=1
tr|F8QU31|F8QU31_RAT	18	43	51.39	8	8	1491900	3	3	6	N	42181	Cytochrome b (Fragment) OS=Rattus norvegicus OX=10116 GN=cytb PE=3 SV=1
tr|A0A411P2K0|A0A411P2K0_RAT	18	44	51.39	8	8	1491900	3	3	6	N	42238	Cytochrome b (Fragment) OS=Rattus norvegicus OX=10116 GN=Cytb PE=3 SV=1
tr|L0L4L8|L0L4L8_RAT	18	45	51.39	8	8	1491900	3	3	6	N	42470	Cytochrome b (Fragment) OS=Rattus norvegicus OX=10116 GN=cytb PE=3 SV=1
tr|A0A140GE10|A0A140GE10_RAT	18	46	51.39	8	8	1491900	3	3	6	N	42574	Cytochrome b (Fragment) OS=Rattus norvegicus OX=10116 PE=3 SV=1
tr|A0A140GE11|A0A140GE11_RAT	18	47	51.39	8	8	1491900	3	3	6	N	42588	Cytochrome b (Fragment) OS=Rattus norvegicus OX=10116 PE=3 SV=1
tr|A0A140GE08|A0A140GE08_RAT	18	48	51.39	8	8	1491900	3	3	6	N	42527	Cytochrome b (Fragment) OS=Rattus norvegicus OX=10116 PE=3 SV=1
tr|A0A385HCC9|A0A385HCC9_RAT	18	49	51.39	8	8	1491900	3	3	6	N	42766	Cytochrome b (Fragment) OS=Rattus norvegicus OX=10116 PE=3 SV=1
tr|A0A3Q8AGE8|A0A3Q8AGE8_RAT	18	50	51.39	8	8	1491900	3	3	6	N	42712	Cytochrome b (Fragment) OS=Rattus norvegicus OX=10116 GN=Cytb PE=3 SV=1
tr|A0A3S6FK13|A0A3S6FK13_RAT	18	51	51.39	8	8	1491900	3	3	6	N	42702	Cytochrome b (Fragment) OS=Rattus norvegicus OX=10116 GN=Cytb PE=3 SV=1
tr|A0A3S6FM15|A0A3S6FM15_RAT	18	52	51.39	8	8	1491900	3	3	6	N	42698	Cytochrome b (Fragment) OS=Rattus norvegicus OX=10116 GN=Cytb PE=3 SV=1
tr|A0A097PE40|A0A097PE40_RAT	18	53	51.39	8	8	1491900	3	3	6	N	42865	Cytochrome b OS=Rattus norvegicus OX=10116 GN=CYTB PE=3 SV=1
tr|A0A220D9Z6|A0A220D9Z6_RAT	18	54	51.39	8	8	1491900	3	3	6	N	43018	Cytochrome b OS=Rattus norvegicus OX=10116 PE=3 SV=1
tr|D6NSP2|D6NSP2_RAT	18	55	51.39	8	8	1491900	3	3	6	N	42945	Cytochrome b (Fragment) OS=Rattus norvegicus OX=10116 GN=cytb PE=3 SV=1
tr|D6NSS6|D6NSS6_RAT	18	56	51.39	8	8	1491900	3	3	6	N	42993	Cytochrome b (Fragment) OS=Rattus norvegicus OX=10116 GN=cytb PE=3 SV=1
tr|D6NSQ3|D6NSQ3_RAT	18	57	51.39	8	8	1491900	3	3	6	N	43012	Cytochrome b (Fragment) OS=Rattus norvegicus OX=10116 GN=cytb PE=3 SV=1
tr|D6NSR3|D6NSR3_RAT	18	58	51.39	8	8	1491900	3	3	6	N	42986	Cytochrome b (Fragment) OS=Rattus norvegicus OX=10116 GN=cytb PE=3 SV=1
tr|D6NSP4|D6NSP4_RAT	18	59	51.39	8	8	1491900	3	3	6	N	43016	Cytochrome b (Fragment) OS=Rattus norvegicus OX=10116 GN=cytb PE=3 SV=1
tr|D6NSQ8|D6NSQ8_RAT	18	60	51.39	8	8	1491900	3	3	6	N	43016	Cytochrome b (Fragment) OS=Rattus norvegicus OX=10116 GN=cytb PE=3 SV=1
tr|D6NSR8|D6NSR8_RAT	18	61	51.39	8	8	1491900	3	3	6	N	42998	Cytochrome b (Fragment) OS=Rattus norvegicus OX=10116 GN=cytb PE=3 SV=1
tr|F8QU37|F8QU37_RAT	18	62	51.39	8	8	1491900	3	3	6	N	42992	Cytochrome b (Fragment) OS=Rattus norvegicus OX=10116 GN=cytb PE=3 SV=1
tr|F2Q6S6|F2Q6S6_RAT	18	63	51.39	8	8	1491900	3	3	6	N	42938	Cytochrome b (Fragment) OS=Rattus norvegicus OX=10116 GN=cytb PE=3 SV=1
tr|A0A0A1FZ42|A0A0A1FZ42_RAT	18	64	51.39	8	8	1491900	3	3	6	N	42989	Cytochrome b OS=Rattus norvegicus OX=10116 GN=CYTB PE=3 SV=1
tr|D6NSS7|D6NSS7_RAT	18	65	51.39	8	8	1491900	3	3	6	N	42948	Cytochrome b (Fragment) OS=Rattus norvegicus OX=10116 GN=cytb PE=3 SV=1
tr|Q8SEY9|Q8SEY9_RAT	18	66	51.39	8	8	1491900	3	3	6	N	43015	Cytochrome b OS=Rattus norvegicus OX=10116 GN=cytb PE=3 SV=1
tr|D6NSR7|D6NSR7_RAT	18	67	51.39	8	8	1491900	3	3	6	N	42982	Cytochrome b (Fragment) OS=Rattus norvegicus OX=10116 GN=cytb PE=3 SV=1
tr|A0A220DA44|A0A220DA44_RAT	18	68	51.39	8	8	1491900	3	3	6	N	42968	Cytochrome b OS=Rattus norvegicus OX=10116 PE=3 SV=1
tr|F2Q6S5|F2Q6S5_RAT	18	69	51.39	8	8	1491900	3	3	6	N	42952	Cytochrome b (Fragment) OS=Rattus norvegicus OX=10116 GN=cytb PE=3 SV=1
tr|D6NSQ6|D6NSQ6_RAT	18	70	51.39	8	8	1491900	3	3	6	N	42952	Cytochrome b (Fragment) OS=Rattus norvegicus OX=10116 GN=cytb PE=3 SV=1
tr|D6NSQ0|D6NSQ0_RAT	18	71	51.39	8	8	1491900	3	3	6	N	42968	Cytochrome b (Fragment) OS=Rattus norvegicus OX=10116 GN=cytb PE=3 SV=1
tr|Q5UAI7|Q5UAI7_RAT	18	72	51.39	8	8	1491900	3	3	6	N	42998	Cytochrome b OS=Rattus norvegicus OX=10116 GN=CYTB PE=3 SV=1
tr|D6NSR2|D6NSR2_RAT	18	73	51.39	8	8	1491900	3	3	6	N	43073	Cytochrome b (Fragment) OS=Rattus norvegicus OX=10116 GN=cytb PE=3 SV=1
tr|A0A0S1Z1V9|A0A0S1Z1V9_RAT	18	74	51.39	8	8	1491900	3	3	6	N	43002	Cytochrome b OS=Rattus norvegicus OX=10116 GN=CYTB PE=3 SV=1
tr|D6NSR1|D6NSR1_RAT	18	75	51.39	8	8	1491900	3	3	6	N	43002	Cytochrome b (Fragment) OS=Rattus norvegicus OX=10116 GN=cytb PE=3 SV=1
tr|Q8HIC4|Q8HIC4_RAT	18	76	51.39	8	8	1491900	3	3	6	N	43012	Cytochrome b OS=Rattus norvegicus OX=10116 GN=Mt-cyb PE=3 SV=1
tr|A0A220DA02|A0A220DA02_RAT	18	77	51.39	8	8	1491900	3	3	6	N	42968	Cytochrome b OS=Rattus norvegicus OX=10116 PE=3 SV=1
tr|A0A0S1Z1V4|A0A0S1Z1V4_RAT	18	78	51.39	8	8	1491900	3	3	6	N	43016	Cytochrome b OS=Rattus norvegicus OX=10116 GN=CYTB PE=3 SV=1
P00159|CYB_RAT	18	79	51.39	8	8	1491900	3	3	6	N	43012	Cytochrome b OS=Rattus norvegicus OX=10116 GN=Mt-Cyb PE=3 SV=3
tr|L0N311|L0N311_RAT	18	80	51.39	8	8	1491900	3	3	6	N	43045	Cytochrome b (Fragment) OS=Rattus norvegicus OX=10116 GN=cytb PE=3 SV=1
tr|A0A220DA28|A0A220DA28_RAT	18	81	51.39	8	8	1491900	3	3	6	N	42970	Cytochrome b OS=Rattus norvegicus OX=10116 PE=3 SV=1
tr|H2KXA0|H2KXA0_RAT	18	82	51.39	8	8	1491900	3	3	6	N	42978	Cytochrome b (Fragment) OS=Rattus norvegicus OX=10116 GN=cytb PE=3 SV=1
tr|A0A096XNM4|A0A096XNM4_RAT	18	83	51.39	8	8	1491900	3	3	6	N	43042	Cytochrome b (Fragment) OS=Rattus norvegicus OX=10116 PE=3 SV=1
Q9JJW3|ATPMD_RAT	28	89	45.84	33	33	927040	2	2	3	N	6408	ATP synthase membrane subunit DAPIT, mitochondrial OS=Rattus norvegicus OX=10116 GN=Atp5md PE=1 SV=1
tr|Q6QI69|Q6QI69_RAT	23	87	38.2	4	4	424920	2	1	4	Y	46014	LRRGT00139 OS=Rattus norvegicus OX=10116 GN=LOC500350 PE=2 SV=1
Q68FY0|QCR1_RAT	35	118	37.65	4	4	60256	2	2	2	N	52849	Cytochrome b-c1 complex subunit 1, mitochondrial OS=Rattus norvegicus OX=10116 GN=Uqcrc1 PE=1 SV=1
D3ZAF6|ATPK_RAT	24	85	31.38	24	24	380940	3	3	3	Y	10452	ATP synthase subunit f, mitochondrial OS=Rattus norvegicus OX=10116 GN=Atp5mf PE=1 SV=1
Q63704|CPT1B_RAT	77	138	30.76	2	2	143510	1	1	1	N	88217	Carnitine O-palmitoyltransferase 1, muscle isoform OS=Rattus norvegicus OX=10116 GN=Cpt1b PE=1 SV=1
P12075|COX5B_RAT	38	139	28.66	9	9	516610	1	1	2	N	13915	Cytochrome c oxidase subunit 5B, mitochondrial OS=Rattus norvegicus OX=10116 GN=Cox5b PE=1 SV=2
P63039|CH60_RAT	78	142	44558	2	2	219720	1	1	1	N	60956	60 kDa heat shock protein, mitochondrial OS=Rattus norvegicus OX=10116 GN=Hspd1 PE=1 SV=1
tr|A0A482IDN3|A0A482IDN3_RAT	78	143	44558	2	2	219720	1	1	1	N	60956	Hsp60 OS=Rattus norvegicus OX=10116 GN=Hspd1 PE=2 SV=1
tr|A0A0G2K5L6|A0A0G2K5L6_RAT	40	127	23.19	0	0	0	1	1	1	N	275755	Acetyl-CoA carboxylase beta OS=Rattus norvegicus OX=10116 GN=Acacb PE=1 SV=1
tr|A0A0G2K1F2|A0A0G2K1F2_RAT	40	128	23.19	0	0	0	1	1	1	N	276393	Acetyl-CoA carboxylase beta OS=Rattus norvegicus OX=10116 GN=Acacb PE=1 SV=1
tr|D3ZBE2|D3ZBE2_RAT	40	129	23.19	0	0	0	1	1	1	N	275967	Acetyl-CoA carboxylase beta OS=Rattus norvegicus OX=10116 GN=Acacb PE=1 SV=3
tr|E9PSQ0|E9PSQ0_RAT	40	130	23.19	0	0	0	1	1	1	N	276255	Acetyl-CoA carboxylase beta OS=Rattus norvegicus OX=10116 GN=Acacb PE=1 SV=2
tr|O70151|O70151_RAT	40	140	23.19	0	0	0	1	1	1	N	276097	Acetyl-CoA carboxylase OS=Rattus norvegicus OX=10116 GN=Acacb PE=2 SV=1
P11497|ACACA_RAT	40	165	23.19	0	0	0	1	1	1	N	265191	Acetyl-CoA carboxylase 1 OS=Rattus norvegicus OX=10116 GN=Acaca PE=1 SV=1
P10817|CX6A2_RAT	66	151	44370	12	12	214450	1	1	1	N	10487	Cytochrome c oxidase subunit 6A2, mitochondrial (Fragment) OS=Rattus norvegicus OX=10116 GN=Cox6a2 PE=1 SV=3
tr|G3V8M4|G3V8M4_RAT	66	152	44370	11	11	214450	1	1	1	N	10802	Cytochrome c oxidase subunit 6A, mitochondrial OS=Rattus norvegicus OX=10116 GN=Cox6a2 PE=3 SV=1
tr|A0A0G2K4C6|A0A0G2K4C6_RAT	67	159	22.21	1	1	425080	1	1	1	N	63436	Malic enzyme OS=Rattus norvegicus OX=10116 GN=Me3 PE=3 SV=1
P13697|MAOX_RAT	67	160	22.21	1	1	425080	1	1	1	N	64003	NADP-dependent malic enzyme OS=Rattus norvegicus OX=10116 GN=Me1 PE=1 SV=2
tr|D3ZJH9|D3ZJH9_RAT	67	161	22.21	1	1	425080	1	1	1	N	65352	Malic enzyme OS=Rattus norvegicus OX=10116 GN=Me2 PE=1 SV=1
tr|A0A0G2K502|A0A0G2K502_RAT	67	162	22.21	1	1	425080	1	1	1	N	66310	Malic enzyme OS=Rattus norvegicus OX=10116 GN=Me2 PE=1 SV=1
tr|F1M5N4|F1M5N4_RAT	67	163	22.21	1	1	425080	1	1	1	N	67209	Malic enzyme OS=Rattus norvegicus OX=10116 GN=Me3 PE=3 SV=2
Q4V8F9|HSDL2_RAT	48	121	21.81	2	2	179650	1	1	1	N	58344	Hydroxysteroid dehydrogenase-like protein 2 OS=Rattus norvegicus OX=10116 GN=Hsdl2 PE=2 SV=1
tr|A0A140TAG5|A0A140TAG5_RAT	65	145	20.88	2	2	45168	1	1	1	N	67049	MICOS complex subunit MIC60 OS=Rattus norvegicus OX=10116 GN=Immt PE=1 SV=1
Q3KR86|MIC60_RAT	65	146	20.88	2	2	45168	1	1	1	N	67177	MICOS complex subunit Mic60 (Fragment) OS=Rattus norvegicus OX=10116 GN=Immt PE=1 SV=1
tr|A0A0G2JVH4|A0A0G2JVH4_RAT	65	147	20.88	2	2	45168	1	1	1	N	86230	MICOS complex subunit MIC60 OS=Rattus norvegicus OX=10116 GN=Immt PE=1 SV=1
tr|D4A4K4|D4A4K4_RAT	30	173	44520	0	0	475940	1	1	2	N	418626	Vacuolar protein sorting 13 homolog C OS=Rattus norvegicus OX=10116 GN=Vps13c PE=1 SV=2
