# Supplementary material for: Mitochondrial F-ATP Synthase Co-Migrating Proteins and Ca2+-Dependent Formation of Large Channels
Source: Cells. 2023 Oct 7;12(19):2414. doi: 10.3390/cells12192414 (PMC10572550; doi:10.3390/cells12192414)
Supplement: Supplementary file 1 [file cells-12-02414-s001.zip › Dataset S2.xlsx]

## Sheet: Dimer
Protein Group	Protein ID	Accession	-10lgP	Coverage (%)	Coverage (%) Sample 4	Area Sample 4	#Peptides	#Unique	#Spec Sample 4	PTM	Avg. Mass	Description
1	5	P10719|ATPB_RAT	390.79	47	47	1332000000	124	120	681	Oxidation (M)	56354	ATP synthase subunit beta mitochondrial OS=Rattus norvegicus OX=10116 GN=Atp5f1b PE=1 SV=2
1	6	tr|G3V6D3|G3V6D3_RAT	390.79	47	47	1332000000	124	120	681	Oxidation (M)	56345	ATP synthase subunit beta OS=Rattus norvegicus OX=10116 GN=Atp5f1b PE=1 SV=1
2	8	P15999|ATPA_RAT	331.26	41	41	708500000	109	107	645	Carbamidomethylation
2	9	tr|F1LP05|F1LP05_RAT	331.26	41	41	708500000	109	107	645	Carbamidomethylation
6	65	P31399|ATP5H_RAT	277.38	61	61	85344000	30	30	128	Oxidation (M)	18763	ATP synthase subunit d mitochondrial OS=Rattus norvegicus OX=10116 GN=Atp5pd PE=1 SV=3
4	63	P35435|ATPG_RAT	262.75	37	37	71921000	37	37	141	Oxidation (M)	30191	ATP synthase subunit gamma mitochondrial OS=Rattus norvegicus OX=10116 GN=Atp5f1c PE=1 SV=2
4	64	tr|Q6QI09|Q6QI09_RAT	262.75	17	17	71921000	37	37	141	Oxidation (M)	67721	ATP synthase subunit gamma mitochondrial OS=Rattus norvegicus OX=10116 GN=Taf3 PE=1 SV=1
5	20	Q66HF1|NDUS1_RAT	252.49	21	21	44940000	39	39	140	Carbamidomethylation	79412	NADH-ubiquinone oxidoreductase 75 kDa subunit mitochondrial OS=Rattus norvegicus OX=10116 GN=Ndufs1 PE=1 SV=1
12	212	tr|B2RYS8|B2RYS8_RAT	246.45	48	48	23237000	23	23	61	Oxidation (M)	21959	NADH dehydrogenase [ubiquinone] 1 beta subcomplex subunit 8 mitochondrial OS=Rattus norvegicus OX=10116 GN=Ndufb8 PE=1 SV=1
3	37	P19234|NDUV2_RAT	241.39	44	44	107110000	30	30	145		27378	NADH dehydrogenase [ubiquinone] flavoprotein 2 mitochondrial OS=Rattus norvegicus OX=10116 GN=Ndufv2 PE=1 SV=2
15	60	tr|D4A565|D4A565_RAT	232.34	34	34	13310000	15	15	47		21664	NADH dehydrogenase (Ubiquinone) 1 beta subcomplex 5 (Predicted) isoform CRA_b OS=Rattus norvegicus OX=10116 GN=Ndufb5 PE=1 SV=1
9	26	Q641Y2|NDUS2_RAT	204.62	26	26	38990000	29	29	80	Oxidation (M)	52562	NADH dehydrogenase [ubiquinone] iron-sulfur protein 2 mitochondrial OS=Rattus norvegicus OX=10116 GN=Ndufs2 PE=1 SV=1
13	77	tr|Q5PQZ9|Q5PQZ9_RAT	201.91	37	37	23190000	13	13	56		14359	NADH dehydrogenase [ubiquinone] 1 subunit C2 OS=Rattus norvegicus OX=10116 GN=Ndufc2 PE=1 SV=1
35	248	tr|A9UMW2|A9UMW2_RAT	198.26	37	37	15874000	9	9	24	Oxidation (M)	9255	Ndufa3 protein (Fragment) OS=Rattus norvegicus OX=10116 GN=Ndufa3 PE=2 SV=1
35	249	tr|M0RB63|M0RB63_RAT	198.26	37	37	15874000	9	9	24	Oxidation (M)	9372	RCG63041 OS=Rattus norvegicus OX=10116 GN=LOC684509 PE=4 SV=1
35	250	tr|A0A0G2KAA3|A0A0G2KAA3_RAT	198.26	34	34	15874000	9	9	24	Oxidation (M)	10170	NADH:ubiquinone oxidoreductase subunit A3 OS=Rattus norvegicus OX=10116 GN=Ndufa3 PE=1 SV=1
24	59	tr|D3ZFQ8|D3ZFQ8_RAT	196.84	13	13	16205000	9	9	37		35435	Cytochrome c-1 OS=Rattus norvegicus OX=10116 GN=Cyc1 PE=1 SV=3
20	160	tr|D4A7L4|D4A7L4_RAT	196.05	26	26	22440000	9	9	41		17634	NADH dehydrogenase (Ubiquinone) 1 beta subcomplex 11 (Predicted) OS=Rattus norvegicus OX=10116 GN=Ndufb11 PE=1 SV=1
11	49	Q5BK63|NDUA9_RAT	195.5	30	30	18496000	21	21	61		42559	NADH dehydrogenase [ubiquinone] 1 alpha subcomplex subunit 9 mitochondrial OS=Rattus norvegicus OX=10116 GN=Ndufa9 PE=1 SV=2
36	58	P20788|UCRI_RAT	186.51	17	17	11018000	9	9	21		29446	Cytochrome b-c1 complex subunit Rieske mitochondrial OS=Rattus norvegicus OX=10116 GN=Uqcrfs1 PE=1 SV=2
18	252	tr|D3ZF13|D3ZF13_RAT	185.52	23	23	15771000	13	13	44	Oxidation (M)	17514	Acyl carrier protein OS=Rattus norvegicus OX=10116 GN=Ndufab1 PE=1 SV=1
7	75	Q6PDU7|ATP5L_RAT	183.33	48	48	34124000	19	18	89	Oxidation (M)	11433	ATP synthase subunit g mitochondrial OS=Rattus norvegicus OX=10116 GN=Atp5mg PE=1 SV=2
25	211	tr|F1LXA0|F1LXA0_RAT	173.13	29	29	17750000	8	8	37		17178	NADH dehydrogenase [ubiquinone] 1 alpha subcomplex subunit 12 OS=Rattus norvegicus OX=10116 GN=Ndufa12 PE=1 SV=2
8	168	P19511|AT5F1_RAT	173.06	20	20	115380000	18	18	81		28869	ATP synthase F(0) complex subunit B1 mitochondrial OS=Rattus norvegicus OX=10116 GN=Atp5pb PE=1 SV=1
22	199	tr|B0BNE6|B0BNE6_RAT	172.57	25	25	10124000	13	13	39		23970	NADH dehydrogenase (Ubiquinone) Fe-S protein 8 (Predicted) isoform CRA_a OS=Rattus norvegicus OX=10116 GN=Ndufs8 PE=1 SV=1
42	25	Q68FY0|QCR1_RAT	165.24	14	14	3582000	9	9	16	Carbamidomethylation	52849	Cytochrome b-c1 complex subunit 1 mitochondrial OS=Rattus norvegicus OX=10116 GN=Uqcrc1 PE=1 SV=1
31	198	Q80W89|NDUAB_RAT	165.2	18	18	16649000	7	7	26		14854	NADH dehydrogenase [ubiquinone] 1 alpha subcomplex subunit 11 OS=Rattus norvegicus OX=10116 GN=Ndufa11 PE=2 SV=1
14	74	tr|D3ZG43|D3ZG43_RAT	164.22	34	34	19140000	22	22	52		30226	NADH dehydrogenase (Ubiquinone) Fe-S protein 3 (Predicted) isoform CRA_c OS=Rattus norvegicus OX=10116 GN=Ndufs3 PE=1 SV=1
10	76	Q06647|ATPO_RAT	162.91	29	29	41599000	19	18	72		23398	ATP synthase subunit O mitochondrial OS=Rattus norvegicus OX=10116 GN=Atp5po PE=1 SV=1
33	45	P00507|AATM_RAT	162.61	17	17	5175700	11	11	25	Oxidation (M)	47314	Aspartate aminotransferase mitochondrial OS=Rattus norvegicus OX=10116 GN=Got2 PE=1 SV=2
21	161	tr|A0A0G2JVL6|A0A0G2JVL6_RAT	161.02	44	44	25632000	13	13	39	Carbamidomethylation	19965	NADH dehydrogenase [ubiquinone] 1 alpha subcomplex subunit 8 OS=Rattus norvegicus OX=10116 GN=Ndufa8 PE=1 SV=1
23	172	tr|D4A0T0|D4A0T0_RAT	158.95	27	27	12832000	10	10	38		20859	NADH:ubiquinone oxidoreductase subunit B10 OS=Rattus norvegicus OX=10116 GN=Ndufb10 PE=1 SV=1
53	200	P11240|COX5A_RAT	155.04	29	29	2219600	8	8	12		16130	Cytochrome c oxidase subunit 5A mitochondrial OS=Rattus norvegicus OX=10116 GN=Cox5a PE=1 SV=1
26	313	tr|D3ZZ21|D3ZZ21_RAT	151.15	49	49	8415300	10	10	35	Oxidation (M)	15638	NADH dehydrogenase (Ubiquinone) 1 beta subcomplex 6 (Predicted) OS=Rattus norvegicus OX=10116 GN=Ndufb6 PE=1 SV=1
45	251	P80432|COX7C_RAT	143.95	21	21	4754500	4	4	15		7375	Cytochrome c oxidase subunit 7C mitochondrial OS=Rattus norvegicus OX=10116 GN=Cox7c PE=1 SV=2
19	171	Q561S0|NDUAA_RAT	142.62	24	24	7627700	14	4	43	Oxidation (M)	40493	NADH dehydrogenase [ubiquinone] 1 alpha subcomplex subunit 10 mitochondrial OS=Rattus norvegicus OX=10116 GN=Ndufa10 PE=1 SV=1
27	137	tr|Q06QK5|Q06QK5_RAT	141.53	10	10	9314200	12	12	32	Oxidation (M)	68606	NADH-ubiquinone oxidoreductase chain 5 OS=Rattus norvegicus OX=10116 GN=ND5 PE=3 SV=1
27	138	P11661|NU5M_RAT	141.53	10	10	9314200	12	12	32	Oxidation (M)	68618	NADH-ubiquinone oxidoreductase chain 5 OS=Rattus norvegicus OX=10116 GN=Mtnd5 PE=3 SV=3
27	139	tr|Q06QG6|Q06QG6_RAT	141.53	10	10	9314200	12	12	32	Oxidation (M)	68588	NADH-ubiquinone oxidoreductase chain 5 OS=Rattus norvegicus OX=10116 GN=ND5 PE=3 SV=1
27	140	tr|Q06QA1|Q06QA1_RAT	141.53	10	10	9314200	12	12	32	Oxidation (M)	68574	NADH-ubiquinone oxidoreductase chain 5 OS=Rattus norvegicus OX=10116 GN=ND5 PE=3 SV=1
27	141	tr|Q8SEZ0|Q8SEZ0_RAT	141.53	10	10	9314200	12	12	32	Oxidation (M)	68618	NADH-ubiquinone oxidoreductase chain 5 OS=Rattus norvegicus OX=10116 GN=Mt-nd5 PE=3 SV=1
27	142	tr|A0A096XKT9|A0A096XKT9_RAT	141.53	10	10	9314200	12	12	32	Oxidation (M)	68584	NADH-ubiquinone oxidoreductase chain 5 OS=Rattus norvegicus OX=10116 GN=ND5 PE=3 SV=1
43	83	tr|A0A411P2I9|A0A411P2I9_RAT	140.87	7	7	1957300	6	6	15		40144	Cytochrome b (Fragment) OS=Rattus norvegicus OX=10116 GN=Cytb PE=3 SV=1
43	84	tr|A0A0U2IDR8|A0A0U2IDR8_RAT	140.87	7	7	1957300	6	6	15		40981	Cytochrome b (Fragment) OS=Rattus norvegicus OX=10116 PE=3 SV=1
43	85	tr|A0A0U2M179|A0A0U2M179_RAT	140.87	7	7	1957300	6	6	15		41037	Cytochrome b (Fragment) OS=Rattus norvegicus OX=10116 PE=3 SV=1
43	86	tr|A0A411P2L0|A0A411P2L0_RAT	140.87	7	7	1957300	6	6	15		41017	Cytochrome b (Fragment) OS=Rattus norvegicus OX=10116 GN=Cytb PE=3 SV=1
43	87	tr|F8QU31|F8QU31_RAT	140.87	7	7	1957300	6	6	15		42181	Cytochrome b (Fragment) OS=Rattus norvegicus OX=10116 GN=cytb PE=3 SV=1
43	88	tr|A0A411P2K0|A0A411P2K0_RAT	140.87	7	7	1957300	6	6	15		42238	Cytochrome b (Fragment) OS=Rattus norvegicus OX=10116 GN=Cytb PE=3 SV=1
43	89	tr|L0L4L8|L0L4L8_RAT	140.87	7	7	1957300	6	6	15		42470	Cytochrome b (Fragment) OS=Rattus norvegicus OX=10116 GN=cytb PE=3 SV=1
43	91	tr|A0A140GE10|A0A140GE10_RAT	140.87	7	7	1957300	6	6	15		42574	Cytochrome b (Fragment) OS=Rattus norvegicus OX=10116 PE=3 SV=1
43	92	tr|A0A140GE11|A0A140GE11_RAT	140.87	7	7	1957300	6	6	15		42588	Cytochrome b (Fragment) OS=Rattus norvegicus OX=10116 PE=3 SV=1
43	93	tr|A0A140GE08|A0A140GE08_RAT	140.87	7	7	1957300	6	6	15		42527	Cytochrome b (Fragment) OS=Rattus norvegicus OX=10116 PE=3 SV=1
43	95	tr|A0A385HCC9|A0A385HCC9_RAT	140.87	7	7	1957300	6	6	15		42766	Cytochrome b (Fragment) OS=Rattus norvegicus OX=10116 PE=3 SV=1
43	96	tr|A0A3Q8AGE8|A0A3Q8AGE8_RAT	140.87	7	7	1957300	6	6	15		42712	Cytochrome b (Fragment) OS=Rattus norvegicus OX=10116 GN=Cytb PE=3 SV=1
43	97	tr|A0A3Q8AC68|A0A3Q8AC68_RAT	140.87	7	7	1957300	6	6	15		42622	Cytochrome b (Fragment) OS=Rattus norvegicus OX=10116 GN=Cytb PE=3 SV=1
43	98	tr|A0A3S6FK13|A0A3S6FK13_RAT	140.87	7	7	1957300	6	6	15		42702	Cytochrome b (Fragment) OS=Rattus norvegicus OX=10116 GN=Cytb PE=3 SV=1
43	100	tr|A0A3S6FM15|A0A3S6FM15_RAT	140.87	7	7	1957300	6	6	15		42698	Cytochrome b (Fragment) OS=Rattus norvegicus OX=10116 GN=Cytb PE=3 SV=1
43	101	tr|A0A097PE40|A0A097PE40_RAT	140.87	7	7	1957300	6	6	15		42865	Cytochrome b OS=Rattus norvegicus OX=10116 GN=CYTB PE=3 SV=1
43	102	tr|A0A220D9Z6|A0A220D9Z6_RAT	140.87	7	7	1957300	6	6	15		43018	Cytochrome b OS=Rattus norvegicus OX=10116 PE=3 SV=1
43	103	tr|D6NSP2|D6NSP2_RAT	140.87	7	7	1957300	6	6	15		42945	Cytochrome b (Fragment) OS=Rattus norvegicus OX=10116 GN=cytb PE=3 SV=1
43	104	tr|D6NSS6|D6NSS6_RAT	140.87	7	7	1957300	6	6	15		42993	Cytochrome b (Fragment) OS=Rattus norvegicus OX=10116 GN=cytb PE=3 SV=1
43	106	tr|D6NSQ3|D6NSQ3_RAT	140.87	7	7	1957300	6	6	15		43012	Cytochrome b (Fragment) OS=Rattus norvegicus OX=10116 GN=cytb PE=3 SV=1
43	107	tr|D6NSR3|D6NSR3_RAT	140.87	7	7	1957300	6	6	15		42986	Cytochrome b (Fragment) OS=Rattus norvegicus OX=10116 GN=cytb PE=3 SV=1
43	108	tr|D6NSP4|D6NSP4_RAT	140.87	7	7	1957300	6	6	15		43016	Cytochrome b (Fragment) OS=Rattus norvegicus OX=10116 GN=cytb PE=3 SV=1
43	109	tr|D6NSQ8|D6NSQ8_RAT	140.87	7	7	1957300	6	6	15		43016	Cytochrome b (Fragment) OS=Rattus norvegicus OX=10116 GN=cytb PE=3 SV=1
43	110	tr|D6NSR8|D6NSR8_RAT	140.87	7	7	1957300	6	6	15		42998	Cytochrome b (Fragment) OS=Rattus norvegicus OX=10116 GN=cytb PE=3 SV=1
43	111	tr|F8QU37|F8QU37_RAT	140.87	7	7	1957300	6	6	15		42992	Cytochrome b (Fragment) OS=Rattus norvegicus OX=10116 GN=cytb PE=3 SV=1
43	112	tr|F2Q6S6|F2Q6S6_RAT	140.87	7	7	1957300	6	6	15		42938	Cytochrome b (Fragment) OS=Rattus norvegicus OX=10116 GN=cytb PE=3 SV=1
43	113	tr|A0A0A1FZ42|A0A0A1FZ42_RAT	140.87	7	7	1957300	6	6	15		42989	Cytochrome b OS=Rattus norvegicus OX=10116 GN=CYTB PE=3 SV=1
43	114	tr|D6NSS7|D6NSS7_RAT	140.87	7	7	1957300	6	6	15		42948	Cytochrome b (Fragment) OS=Rattus norvegicus OX=10116 GN=cytb PE=3 SV=1
43	115	tr|Q8SEY9|Q8SEY9_RAT	140.87	7	7	1957300	6	6	15		43015	Cytochrome b OS=Rattus norvegicus OX=10116 GN=cytb PE=3 SV=1
43	116	tr|D6NSR7|D6NSR7_RAT	140.87	7	7	1957300	6	6	15		42982	Cytochrome b (Fragment) OS=Rattus norvegicus OX=10116 GN=cytb PE=3 SV=1
43	117	tr|A0A220DA44|A0A220DA44_RAT	140.87	7	7	1957300	6	6	15		42968	Cytochrome b OS=Rattus norvegicus OX=10116 PE=3 SV=1
43	118	tr|F2Q6S5|F2Q6S5_RAT	140.87	7	7	1957300	6	6	15		42952	Cytochrome b (Fragment) OS=Rattus norvegicus OX=10116 GN=cytb PE=3 SV=1
43	119	tr|D6NSQ6|D6NSQ6_RAT	140.87	7	7	1957300	6	6	15		42952	Cytochrome b (Fragment) OS=Rattus norvegicus OX=10116 GN=cytb PE=3 SV=1
43	120	tr|D6NSQ0|D6NSQ0_RAT	140.87	7	7	1957300	6	6	15		42968	Cytochrome b (Fragment) OS=Rattus norvegicus OX=10116 GN=cytb PE=3 SV=1
43	121	tr|Q5UAI7|Q5UAI7_RAT	140.87	7	7	1957300	6	6	15		42998	Cytochrome b OS=Rattus norvegicus OX=10116 GN=CYTB PE=3 SV=1
43	122	tr|D6NSR2|D6NSR2_RAT	140.87	7	7	1957300	6	6	15		43073	Cytochrome b (Fragment) OS=Rattus norvegicus OX=10116 GN=cytb PE=3 SV=1
43	123	tr|A0A0S1Z1V9|A0A0S1Z1V9_RAT	140.87	7	7	1957300	6	6	15		43002	Cytochrome b OS=Rattus norvegicus OX=10116 GN=CYTB PE=3 SV=1
43	124	tr|D6NSR1|D6NSR1_RAT	140.87	7	7	1957300	6	6	15		43002	Cytochrome b (Fragment) OS=Rattus norvegicus OX=10116 GN=cytb PE=3 SV=1
43	125	tr|Q8HIC4|Q8HIC4_RAT	140.87	7	7	1957300	6	6	15		43012	Cytochrome b OS=Rattus norvegicus OX=10116 GN=Mt-cyb PE=3 SV=1
43	126	tr|A0A220DA02|A0A220DA02_RAT	140.87	7	7	1957300	6	6	15		42968	Cytochrome b OS=Rattus norvegicus OX=10116 PE=3 SV=1
43	128	tr|A0A0S1Z1V4|A0A0S1Z1V4_RAT	140.87	7	7	1957300	6	6	15		43016	Cytochrome b OS=Rattus norvegicus OX=10116 GN=CYTB PE=3 SV=1
43	129	tr|R9TKN1|R9TKN1_RAT	140.87	7	7	1957300	6	6	15		43012	Cytochrome b OS=Rattus norvegicus OX=10116 GN=CYTB PE=3 SV=1
43	130	P00159|CYB_RAT	140.87	7	7	1957300	6	6	15		43012	Cytochrome b OS=Rattus norvegicus OX=10116 GN=Mt-Cyb PE=3 SV=3
43	131	tr|L0N311|L0N311_RAT	140.87	7	7	1957300	6	6	15		43045	Cytochrome b (Fragment) OS=Rattus norvegicus OX=10116 GN=cytb PE=3 SV=1
43	132	tr|A0A220DA28|A0A220DA28_RAT	140.87	7	7	1957300	6	6	15		42970	Cytochrome b OS=Rattus norvegicus OX=10116 PE=3 SV=1
43	133	tr|H2KXA0|H2KXA0_RAT	140.87	7	7	1957300	6	6	15		42978	Cytochrome b (Fragment) OS=Rattus norvegicus OX=10116 GN=cytb PE=3 SV=1
43	134	tr|A0A096XNM4|A0A096XNM4_RAT	140.87	7	7	1957300	6	6	15		43042	Cytochrome b (Fragment) OS=Rattus norvegicus OX=10116 PE=3 SV=1
43	135	tr|D6NSP5|D6NSP5_RAT	140.87	7	7	1957300	6	6	15		43012	Cytochrome b (Fragment) OS=Rattus norvegicus OX=10116 GN=cytb PE=3 SV=1
16	80	tr|Q5XIH3|Q5XIH3_RAT	134.88	14	14	17118000	12	11	46		50731	NADH dehydrogenase [ubiquinone] flavoprotein 1 mitochondrial OS=Rattus norvegicus OX=10116 GN=Ndufv1 PE=1 SV=1
17	50	P32551|QCR2_RAT	134.81	11	11	20812000	10	10	46		48396	Cytochrome b-c1 complex subunit 2 mitochondrial OS=Rattus norvegicus OX=10116 GN=Uqcrc2 PE=1 SV=2
39	219	tr|D3ZS58|D3ZS58_RAT	133.46	12	12	7036800	6	6	19		10845	NADH dehydrogenase [ubiquinone] 1 alpha subcomplex subunit 2 OS=Rattus norvegicus OX=10116 GN=Ndufa2 PE=1 SV=1
30	56	tr|F1LPG5|F1LPG5_RAT	128.69	35	35	6988600	9	9	26		15064	NADH:ubiquinone oxidoreductase subunit B4 OS=Rattus norvegicus OX=10116 GN=Ndufb4 PE=1 SV=1
30	57	tr|F1M7T1|F1M7T1_RAT	128.69	35	35	6988600	9	9	26		15160	NADH dehydrogenase (ubiquinone) 1 beta subcomplex 4 OS=Rattus norvegicus OX=10116 GN=LOC100361934 PE=4 SV=2
49	532	P67779|PHB_RAT	128.14	18	18	2906900	8	8	12		29820	Prohibitin OS=Rattus norvegicus OX=10116 GN=Phb PE=1 SV=1
29	319	P29419|ATP5I_RAT	125.84	51	51	10020000	10	10	28		8255	ATP synthase subunit e mitochondrial OS=Rattus norvegicus OX=10116 GN=Atp5me PE=1 SV=3
34	33	tr|S5RZM8|S5RZM8_RAT	125.74	32	32	4454900	10	10	24	Oxidation (M)	25958	Cytochrome c oxidase subunit 2 OS=Rattus norvegicus OX=10116 GN=COX2 PE=3 SV=1
34	34	P00406|COX2_RAT	125.74	32	32	4454900	10	10	24	Oxidation (M)	25928	Cytochrome c oxidase subunit 2 OS=Rattus norvegicus OX=10116 GN=Mtco2 PE=1 SV=3
34	28	tr|Q5UAJ6|Q5UAJ6_RAT	125.74	32	32	4454900	10	10	24	Oxidation (M)	25942	Cytochrome c oxidase subunit 2 OS=Rattus norvegicus OX=10116 GN=COX2 PE=3 SV=1
34	35	tr|Q8SEZ5|Q8SEZ5_RAT	125.74	32	32	4454900	10	10	24	Oxidation (M)	25928	Cytochrome c oxidase subunit 2 OS=Rattus norvegicus OX=10116 GN=Mt-co2 PE=1 SV=1
34	36	tr|A0A097PE04|A0A097PE04_RAT	125.74	32	32	4454900	10	10	24	Oxidation (M)	25894	Cytochrome c oxidase subunit 2 OS=Rattus norvegicus OX=10116 GN=COX2 PE=3 SV=1
32	274	tr|A0A1W2Q6F8|A0A1W2Q6F8_RAT	125.06	23	23	586150	11	1	26	Oxidation (M)	40544	NADH dehydrogenase [ubiquinone] 1 alpha subcomplex subunit 10 mitochondrial OS=Rattus norvegicus OX=10116 GN=Ndufa10l1 PE=3 SV=1
41	3899	tr|B5DEL8|B5DEL8_RAT	120.07	22	22	4718000	6	6	17		12700	NADH dehydrogenase (Ubiquinone) Fe-S protein 5 OS=Rattus norvegicus OX=10116 GN=Ndufs5 PE=1 SV=1
41	3900	tr|A0A0G2JZJ9|A0A0G2JZJ9_RAT	120.07	22	22	4718000	6	6	17		12730	Uncharacterized protein OS=Rattus norvegicus OX=10116 PE=4 SV=1
50	253	P10817|CX6A2_RAT	119.87	26	26	4722000	5	5	12		10487	Cytochrome c oxidase subunit 6A2 mitochondrial (Fragment) OS=Rattus norvegicus OX=10116 GN=Cox6a2 PE=1 SV=3
50	254	tr|G3V8M4|G3V8M4_RAT	119.87	25	25	4722000	5	5	12		10802	Cytochrome c oxidase subunit 6A mitochondrial OS=Rattus norvegicus OX=10116 GN=Cox6a2 PE=3 SV=1
40	827	tr|D4A3V2|D4A3V2_RAT	116.96	33	33	2858800	12	12	19		15224	NADH dehydrogenase [ubiquinone] 1 alpha subcomplex subunit 6 OS=Rattus norvegicus OX=10116 GN=Ndufa6 PE=1 SV=1
44	169	tr|A9UMV9|A9UMV9_RAT	115.75	21	21	29657000	4	4	15		12500	NADH:ubiquinone oxidoreductase subunit A7 OS=Rattus norvegicus OX=10116 GN=Ndufa7 PE=1 SV=1
48	233	tr|Q5UAJ5|Q5UAJ5_RAT	115.4	19	19	10140000	4	4	13	Oxidation (M)	7642	ATP synthase protein 8 OS=Rattus norvegicus OX=10116 GN=ATP8 PE=3 SV=1
48	234	P11608|ATP8_RAT	115.4	19	19	10140000	4	4	13	Oxidation (M)	7630	ATP synthase protein 8 OS=Rattus norvegicus OX=10116 GN=Mt-atp8 PE=1 SV=2
48	235	tr|Q8SEZ4|Q8SEZ4_RAT	115.4	19	19	10140000	4	4	13	Oxidation (M)	7632	ATP synthase protein 8 OS=Rattus norvegicus OX=10116 GN=ATPase8 PE=3 SV=1
48	236	tr|Q8HIC8|Q8HIC8_RAT	115.4	19	19	10140000	4	4	13	Oxidation (M)	7630	ATP synthase protein 8 OS=Rattus norvegicus OX=10116 GN=Mt-atp8 PE=3 SV=1
28	72	tr|D3ZE15|D3ZE15_RAT	114.68	28	28	5077900	8	7	28		16777	NADH:ubiquinone oxidoreductase subunit A13 OS=Rattus norvegicus OX=10116 GN=Ndufa13 PE=1 SV=1
54	318	Q5M9I5|QCR6_RAT	111.53	18	18	3134300	4	4	12		10424	Cytochrome b-c1 complex subunit 6 mitochondrial OS=Rattus norvegicus OX=10116 GN=Uqcrh PE=3 SV=1
55	238	Q5XIF3|NDUS4_RAT	107.99	12	12	4448800	3	3	11		19741	NADH dehydrogenase [ubiquinone] iron-sulfur protein 4 mitochondrial OS=Rattus norvegicus OX=10116 GN=Ndufs4 PE=1 SV=1
71	73	Q63362|NDUA5_RAT	97.02	17	17	1856800	4	4	6		13412	NADH dehydrogenase [ubiquinone] 1 alpha subcomplex subunit 5 OS=Rattus norvegicus OX=10116 GN=Ndufa5 PE=1 SV=3
75	3930	tr|Q35733|Q35733_RAT	93.65	14	14	1292900	3	3	6		8389	NADH-ubiquinone oxidoreductase chain 6 (Fragment) OS=Rattus norvegicus OX=10116 PE=3 SV=1
75	3921	tr|Q06QD9|Q06QD9_RAT	93.65	6	6	1292900	3	3	6		18943	NADH-ubiquinone oxidoreductase chain 6 OS=Rattus norvegicus OX=10116 GN=ND6 PE=3 SV=1
75	3922	tr|Q7HKW2|Q7HKW2_RAT	93.65	6	6	1292900	3	3	6		18957	NADH-ubiquinone oxidoreductase chain 6 OS=Rattus norvegicus OX=10116 GN=NADH6 PE=3 SV=1
47	376	tr|Q5RJN0|Q5RJN0_RAT	91.45	21	21	4000800	5	5	13	Oxidation (M)	23945	NADH dehydrogenase (Ubiquinone) Fe-S protein 7 OS=Rattus norvegicus OX=10116 GN=Ndufs7 PE=1 SV=1
77	17	Q9ER34|ACON_RAT	89.78	3	3	592450	3	3	5		85433	Aconitate hydratase mitochondrial OS=Rattus norvegicus OX=10116 GN=Aco2 PE=1 SV=2
64	16	P02563|MYH6_RAT	86.5	3	3	1488600	5	5	7	Oxidation (M)	223506	Myosin-6 OS=Rattus norvegicus OX=10116 GN=Myh6 PE=1 SV=2
61	61	Q63704|CPT1B_RAT	83.57	3	3	501400	3	3	7		88217	Carnitine O-palmitoyltransferase 1 muscle isoform OS=Rattus norvegicus OX=10116 GN=Cpt1b PE=1 SV=1
58	23	tr|Q6P9Y4|Q6P9Y4_RAT	81.73	10	10	1542600	5	5	10		32904	ADP/ATP translocase 1 OS=Rattus norvegicus OX=10116 GN=Slc25a4 PE=1 SV=1
58	24	Q05962|ADT1_RAT	81.73	10	10	1542600	5	5	10		32989	ADP/ATP translocase 1 OS=Rattus norvegicus OX=10116 GN=Slc25a4 PE=1 SV=3
58	27	Q09073|ADT2_RAT	81.73	10	10	1542600	5	5	10		32901	ADP/ATP translocase 2 OS=Rattus norvegicus OX=10116 GN=Slc25a5 PE=1 SV=3
46	3953	tr|G3V7Y3|G3V7Y3_RAT	81.42	11	11	7345400	5	5	14		17563	ATP synthase subunit delta mitochondrial OS=Rattus norvegicus OX=10116 GN=Atp5f1d PE=1 SV=1
46	3951	tr|B1WBP7|B1WBP7_RAT	81.42	15	15	7345400	5	5	14		12884	ATP synthase subunit delta mitochondrial OS=Rattus norvegicus OX=10116 GN=Atp5f1d PE=1 SV=1
85	263	P35171|CX7A2_RAT	80.03	12	12	1154800	2	2	4		9353	Cytochrome c oxidase subunit 7A2 mitochondrial OS=Rattus norvegicus OX=10116 GN=Cox7a2 PE=1 SV=1
85	264	tr|B2RYS0|B2RYS0_RAT	80.03	12	12	1154800	2	2	4		9353	Cox7a2 protein OS=Rattus norvegicus OX=10116 GN=Cox7a2 PE=2 SV=1
67	29	Q60587|ECHB_RAT	79.98	8	8	922820	5	5	7		51414	Trifunctional enzyme subunit beta mitochondrial OS=Rattus norvegicus OX=10116 GN=Hadhb PE=1 SV=1
67	40	tr|A0A0G2K330|A0A0G2K330_RAT	79.98	7	7	922820	5	5	7		52568	Trifunctional enzyme subunit beta mitochondrial OS=Rattus norvegicus OX=10116 GN=Hadhb PE=1 SV=1
56	3914	tr|B2RYU0|B2RYU0_RAT	78.75	26	26	6410100	5	4	11		11842	NADH dehydrogenase (Ubiquinone) 1 beta subcomplex 2 (Predicted) isoform CRA_b OS=Rattus norvegicus OX=10116 GN=Ndufb2 PE=1 SV=1
69	14	Q6AXV4|SAM50_RAT	77.24	6	6	384640	3	3	7		51960	Sorting and assembly machinery component 50 homolog OS=Rattus norvegicus OX=10116 GN=Samm50 PE=1 SV=1
70	335	Q5XIH7|PHB2_RAT	74.3	10	10	1760800	4	4	6		33312	Prohibitin-2 OS=Rattus norvegicus OX=10116 GN=Phb2 PE=1 SV=1
38	3918	tr|D3ZLT1|D3ZLT1_RAT	74.26	16	16	6726500	3	3	20	Oxidation (M)	16568	NADH dehydrogenase (Ubiquinone) 1 beta subcomplex 7 (Predicted) OS=Rattus norvegicus OX=10116 GN=Ndufb7 PE=1 SV=1
79	44	P17764|THIL_RAT	69.95	5	5	1291000	2	2	5		44695	Acetyl-CoA acetyltransferase mitochondrial OS=Rattus norvegicus OX=10116 GN=Acat1 PE=1 SV=1
52	3906	tr|D3ZCZ9|D3ZCZ9_RAT	67.58	16	16	3706100	3	3	12		13040	NADH dehydrogenase [ubiquinone] iron-sulfur protein 6 mitochondrial OS=Rattus norvegicus OX=10116 GN=LOC100912599 PE=1 SV=1
110	245	tr|C8CHS6|C8CHS6_RAT	64.42	15	15	0	1	1	2		7988	Mitochondrial superoxide dismutase 2 (Fragment) OS=Rattus norvegicus OX=10116 PE=2 SV=1
110	71	P07895|SODM_RAT	64.42	5	5	0	1	1	2		24674	Superoxide dismutase [Mn] mitochondrial OS=Rattus norvegicus OX=10116 GN=Sod2 PE=1 SV=2
60	21	Q64428|ECHA_RAT	62.55	6	6	620770	5	5	7		82665	Trifunctional enzyme subunit alpha mitochondrial OS=Rattus norvegicus OX=10116 GN=Hadha PE=1 SV=2
89	12037	P21571|ATP5J_RAT	60.92	24	24	633850	3	3	3	Oxidation (M)	12494	ATP synthase-coupling factor 6 mitochondrial OS=Rattus norvegicus OX=10116 GN=Atp5pf PE=1 SV=1
81	1021	tr|Q06QA9|Q06QA9_RAT	60.72	3	3	609670	2	2	5		56893	Cytochrome c oxidase subunit 1 OS=Rattus norvegicus OX=10116 GN=CO1 PE=3 SV=1
81	1022	tr|Q06QK0|Q06QK0_RAT	60.72	3	3	609670	2	2	5		56880	Cytochrome c oxidase subunit 1 OS=Rattus norvegicus OX=10116 GN=CO1 PE=3 SV=1
81	1023	tr|Q8SEZ6|Q8SEZ6_RAT	60.72	3	3	609670	2	2	5		56879	Cytochrome c oxidase subunit 1 OS=Rattus norvegicus OX=10116 GN=COI PE=3 SV=1
81	1024	tr|A0A0A1FZ34|A0A0A1FZ34_RAT	60.72	3	3	609670	2	2	5		56937	Cytochrome c oxidase subunit 1 OS=Rattus norvegicus OX=10116 GN=COX1 PE=3 SV=1
81	1025	tr|Q8HIC9|Q8HIC9_RAT	60.72	3	3	609670	2	2	5		56845	Cytochrome c oxidase subunit 1 OS=Rattus norvegicus OX=10116 GN=Mt-co1 PE=3 SV=1
81	1026	P05503|COX1_RAT	60.72	3	3	609670	2	2	5		56845	Cytochrome c oxidase subunit 1 OS=Rattus norvegicus OX=10116 GN=Mtco1 PE=2 SV=3
81	1027	tr|Q95938|Q95938_RAT	60.72	3	3	609670	2	2	5		56977	Cytochrome c oxidase subunit 1 OS=Rattus norvegicus OX=10116 GN=Co I PE=3 SV=1
51	384	tr|Q06Q97|Q06Q97_RAT	55.93	6	6	1523400	3	3	12		38485	NADH-ubiquinone oxidoreductase chain 2 OS=Rattus norvegicus OX=10116 GN=ND2 PE=3 SV=1
51	385	tr|A0A0A1G491|A0A0A1G491_RAT	55.93	6	6	1523400	3	3	12		38542	NADH-ubiquinone oxidoreductase chain 2 OS=Rattus norvegicus OX=10116 GN=ND2 PE=3 SV=1
51	386	tr|Q5UAJ8|Q5UAJ8_RAT	55.93	6	6	1523400	3	3	12		38455	NADH-ubiquinone oxidoreductase chain 2 OS=Rattus norvegicus OX=10116 GN=ND2 PE=3 SV=1
51	388	tr|Q8HID0|Q8HID0_RAT	55.93	6	6	1523400	3	3	12		38653	NADH-ubiquinone oxidoreductase chain 2 OS=Rattus norvegicus OX=10116 GN=Mt-nd2 PE=3 SV=1
51	389	P11662|NU2M_RAT	55.93	6	6	1523400	3	3	12		38653	NADH-ubiquinone oxidoreductase chain 2 OS=Rattus norvegicus OX=10116 GN=Mtnd2 PE=3 SV=3
51	390	tr|Q06QH5|Q06QH5_RAT	55.93	6	6	1523400	3	3	12		38626	NADH-ubiquinone oxidoreductase chain 2 OS=Rattus norvegicus OX=10116 GN=ND2 PE=3 SV=1
51	391	tr|Q8SEZ7|Q8SEZ7_RAT	55.93	6	6	1523400	3	3	12		38580	NADH-ubiquinone oxidoreductase chain 2 (Fragment) OS=Rattus norvegicus OX=10116 GN=NADH2 PE=3 SV=1
51	392	tr|Q06QB0|Q06QB0_RAT	55.93	6	6	1523400	3	3	12		38534	NADH-ubiquinone oxidoreductase chain 2 OS=Rattus norvegicus OX=10116 GN=ND2 PE=3 SV=1
51	393	tr|D2E6P4|D2E6P4_RAT	55.93	6	6	1523400	3	3	12		38623	NADH-ubiquinone oxidoreductase chain 2 OS=Rattus norvegicus OX=10116 GN=ND2 PE=3 SV=1
51	394	tr|Q06QE9|Q06QE9_RAT	55.93	6	6	1523400	3	3	12		38598	NADH-ubiquinone oxidoreductase chain 2 OS=Rattus norvegicus OX=10116 GN=ND2 PE=3 SV=1
90	266	tr|Q7H115|Q7H115_RAT	55.61	3	3	0	2	2	3		29871	Cytochrome c oxidase subunit 3 OS=Rattus norvegicus OX=10116 GN=Mt-co3 PE=3 SV=1
90	267	tr|I6V4L9|I6V4L9_RAT	55.61	3	3	0	2	2	3		29844	Cytochrome c oxidase subunit 3 OS=Rattus norvegicus OX=10116 GN=COX3 PE=3 SV=1
90	268	tr|Q8M7G4|Q8M7G4_RAT	55.61	3	3	0	2	2	3		29861	Cytochrome c oxidase subunit 3 OS=Rattus norvegicus OX=10116 PE=2 SV=1
90	269	tr|A0A096XKT2|A0A096XKT2_RAT	55.61	3	3	0	2	2	3		29901	Cytochrome c oxidase subunit 3 OS=Rattus norvegicus OX=10116 GN=COX3 PE=3 SV=1
90	270	P05505|COX3_RAT	55.61	3	3	0	2	2	3		29871	Cytochrome c oxidase subunit 3 OS=Rattus norvegicus OX=10116 GN=Mtco3 PE=1 SV=5
90	271	tr|Q8SEZ2|Q8SEZ2_RAT	55.61	3	3	0	2	2	3		29870	Cytochrome c oxidase subunit 3 (Fragment) OS=Rattus norvegicus OX=10116 GN=COIII PE=3 SV=1
57	326	Q91XJ1|BECN1_RAT	54.23	3	3		3	0	11		51557	Beclin-1 OS=Rattus norvegicus OX=10116 GN=Becn1 PE=1 SV=1
72	8248	B0BN56|RT31_RAT	53.37	6	6	244140	3	1	6		43962	28S ribosomal protein S31 mitochondrial OS=Rattus norvegicus OX=10116 GN=Mrps31 PE=2 SV=1
86	292	P10888|COX41_RAT	52.97	12	12	827310	3	3	4		19515	Cytochrome c oxidase subunit 4 isoform 1 mitochondrial OS=Rattus norvegicus OX=10116 GN=Cox4i1 PE=1 SV=1
76	3911	tr|B2RYW3|B2RYW3_RAT	51.96	18	18	1163300	4	4	5	Oxidation (M)	21892	NADH dehydrogenase (Ubiquinone) 1 beta subcomplex 9 OS=Rattus norvegicus OX=10116 GN=Ndufb9 PE=1 SV=1
37	256	tr|Q8M7G5|Q8M7G5_RAT	51.09	12	12	4255300	3	3	21	Oxidation (M)	24240	ATP synthase subunit a (Fragment) OS=Rattus norvegicus OX=10116 PE=2 SV=1
37	257	tr|Q549I0|Q549I0_RAT	51.09	12	12	4255300	3	3	21	Oxidation (M)	25050	ATP synthase subunit a OS=Rattus norvegicus OX=10116 GN=atp6 PE=4 SV=1
37	258	P05504|ATP6_RAT	51.09	12	12	4255300	3	3	21	Oxidation (M)	25076	ATP synthase subunit a OS=Rattus norvegicus OX=10116 GN=Mt-atp6 PE=1 SV=3
37	259	tr|Q8HIC7|Q8HIC7_RAT	51.09	12	12	4255300	3	3	21	Oxidation (M)	25076	ATP synthase subunit a OS=Rattus norvegicus OX=10116 GN=Mt-atp6 PE=4 SV=1
37	260	tr|S5S1E9|S5S1E9_RAT	51.09	12	12	4255300	3	3	21	Oxidation (M)	25049	ATP synthase subunit a OS=Rattus norvegicus OX=10116 GN=ATP6 PE=4 SV=1
37	262	tr|Q8SEZ3|Q8SEZ3_RAT	51.09	12	12	4255300	3	3	21	Oxidation (M)	25030	ATP synthase subunit a OS=Rattus norvegicus OX=10116 GN=ATPase6 PE=4 SV=1
68	467	tr|D4A4P3|D4A4P3_RAT	49.48	30	30	1077700	4	4	7	Oxidation (M)	11267	NADH:ubiquinone oxidoreductase subunit B3 OS=Rattus norvegicus OX=10116 GN=Ndufb3 PE=1 SV=1
59	3901	tr|Q8SEZ8|Q8SEZ8_RAT	47.26	5	5	2615200	3	3	10		36133	NADH-ubiquinone oxidoreductase chain 1 (Fragment) OS=Rattus norvegicus OX=10116 GN=NADH1 PE=3 SV=1
59	3902	P03889|NU1M_RAT	47.26	5	5	2615200	3	3	10		36145	NADH-ubiquinone oxidoreductase chain 1 OS=Rattus norvegicus OX=10116 GN=Mtnd1 PE=1 SV=3
59	3903	tr|Q8HID1|Q8HID1_RAT	47.26	5	5	2615200	3	3	10		36145	NADH-ubiquinone oxidoreductase chain 1 OS=Rattus norvegicus OX=10116 GN=Mt-nd1 PE=3 SV=1
59	3904	tr|D2E6L7|D2E6L7_RAT	47.26	5	5	2615200	3	3	10		36062	NADH-ubiquinone oxidoreductase chain 1 OS=Rattus norvegicus OX=10116 GN=ND1 PE=3 SV=1
65	420	tr|D3ZHK4|D3ZHK4_RAT	46.36	1	1		3	0	7		182226	RB1-inducible coiled-coil 1 OS=Rattus norvegicus OX=10116 GN=Rb1cc1 PE=1 SV=1
66	208	Q7TQ16|QCR8_RAT	45.75	11	11	727260	2	2	7		9849	Cytochrome b-c1 complex subunit 8 OS=Rattus norvegicus OX=10116 GN=Uqcrq PE=3 SV=1
73	209	tr|B2RZD6|B2RZD6_RAT	44.09	22	22	1086700	4	4	6		9327	NDUFA4 mitochondrial complex-associated OS=Rattus norvegicus OX=10116 GN=Ndufa4 PE=1 SV=1
80	307	P11497|ACACA_RAT	43.76	1	1	0	3	2	5		265191	Acetyl-CoA carboxylase 1 OS=Rattus norvegicus OX=10116 GN=Acaca PE=1 SV=1
74	300	tr|A0A0G2K1Q1|A0A0G2K1Q1_RAT	43.67	2	2	223570	2	1	6		107334	NLR family member X1 OS=Rattus norvegicus OX=10116 GN=Nlrx1 PE=1 SV=1
74	301	Q5FVQ8|NLRX1_RAT	43.67	2	2	223570	2	1	6		107590	NLR family member X1 OS=Rattus norvegicus OX=10116 GN=Nlrx1 PE=2 SV=1
105	8042	tr|Q4G067|Q4G067_RAT	39.5	4	4	361430	2	2	2		37440	Mitochondrial ribosomal protein L44 OS=Rattus norvegicus OX=10116 GN=Mrpl44 PE=1 SV=1
82	151	P12075|COX5B_RAT	38.68	11	11	8748900	3	3	4		13915	Cytochrome c oxidase subunit 5B mitochondrial OS=Rattus norvegicus OX=10116 GN=Cox5b PE=1 SV=2
62	363	P05508|NU4M_RAT	38.13	5	5	673230	3	3	7		51783	NADH-ubiquinone oxidoreductase chain 4 OS=Rattus norvegicus OX=10116 GN=Mtnd4 PE=3 SV=3
62	364	tr|D2E6K0|D2E6K0_RAT	38.13	5	5	673230	3	3	7		51833	NADH-ubiquinone oxidoreductase chain 4 OS=Rattus norvegicus OX=10116 GN=ND4 PE=3 SV=1
62	365	tr|A7XYB9|A7XYB9_RAT	38.13	5	5	673230	3	3	7		51773	NADH-ubiquinone oxidoreductase chain 4 OS=Rattus norvegicus OX=10116 GN=Nd4 PE=3 SV=1
62	366	tr|Q06QE1|Q06QE1_RAT	38.13	5	5	673230	3	3	7		51851	NADH-ubiquinone oxidoreductase chain 4 OS=Rattus norvegicus OX=10116 GN=ND4 PE=3 SV=1
62	367	tr|Q06QA2|Q06QA2_RAT	38.13	5	5	673230	3	3	7		51787	NADH-ubiquinone oxidoreductase chain 4 OS=Rattus norvegicus OX=10116 GN=ND4 PE=3 SV=1
62	368	tr|Q7HKW3|Q7HKW3_RAT	38.13	5	5	673230	3	3	7		51801	NADH-ubiquinone oxidoreductase chain 4 (Fragment) OS=Rattus norvegicus OX=10116 GN=NADH4 PE=3 SV=1
62	369	tr|Q06QG7|Q06QG7_RAT	38.13	5	5	673230	3	3	7		51791	NADH-ubiquinone oxidoreductase chain 4 OS=Rattus norvegicus OX=10116 GN=ND4 PE=3 SV=1
62	370	tr|Q06Q89|Q06Q89_RAT	38.13	5	5	673230	3	3	7		51819	NADH-ubiquinone oxidoreductase chain 4 OS=Rattus norvegicus OX=10116 GN=ND4 PE=3 SV=1
62	371	tr|Q35737|Q35737_RAT	38.13	5	5	673230	3	3	7		51765	NADH-ubiquinone oxidoreductase chain 4 OS=Rattus norvegicus OX=10116 PE=3 SV=1
62	372	tr|Q8HIC6|Q8HIC6_RAT	38.13	5	5	673230	3	3	7		51783	NADH-ubiquinone oxidoreductase chain 4 OS=Rattus norvegicus OX=10116 GN=Mt-nd4 PE=3 SV=1
149	31	P45953|ACADV_RAT	35.82	2	2	294410	1	1	1		70749	Very long-chain specific acyl-CoA dehydrogenase mitochondrial OS=Rattus norvegicus OX=10116 GN=Acadvl PE=1 SV=1
149	32	tr|Q5M9H2|Q5M9H2_RAT	35.82	2	2	294410	1	1	1		70821	Acyl-Coenzyme A dehydrogenase very long chain OS=Rattus norvegicus OX=10116 GN=Acadvl PE=1 SV=1
112	4487	tr|D4A4B1|D4A4B1_RAT	35.63	8	8	139410	2	2	2		23223	Mitochondrial ribosomal protein L15 OS=Rattus norvegicus OX=10116 GN=Mrpl15 PE=1 SV=2
112	4488	tr|A0A0G2K9B4|A0A0G2K9B4_RAT	35.63	5	5	139410	2	2	2		33652	Mitochondrial ribosomal protein L15 OS=Rattus norvegicus OX=10116 GN=Mrpl15 PE=1 SV=1
109	12038	Q9JJW3|ATPMD_RAT	34.48	22	22	1623300	2	2	2		6408	ATP synthase membrane subunit DAPIT mitochondrial OS=Rattus norvegicus OX=10116 GN=Atp5md PE=1 SV=1
78	12050	D3ZAF6|ATPK_RAT	34.41	10	10	1883500	3	3	5		10452	ATP synthase subunit f mitochondrial OS=Rattus norvegicus OX=10116 GN=Atp5mf PE=1 SV=1
101	343	Q924S5|LONM_RAT	34.12	1	1	59154	1	1	2		105792	Lon protease homolog mitochondrial OS=Rattus norvegicus OX=10116 GN=Lonp1 PE=2 SV=1
84	572	F8WLE0|KIF28_RAT	30.44	2	2	6616400	2	1	4		115542	Kinesin-like protein KIF28P OS=Rattus norvegicus OX=10116 GN=Kif28p PE=2 SV=1
111	315	tr|G3V7I0|G3V7I0_RAT	28.27	5	5	356470	1	1	2		28299	Peroxiredoxin 3 OS=Rattus norvegicus OX=10116 GN=Prdx3 PE=1 SV=1
111	316	Q9Z0V6|PRDX3_RAT	28.27	5	5	356470	1	1	2		28295	Thioredoxin-dependent peroxide reductase mitochondrial OS=Rattus norvegicus OX=10116 GN=Prdx3 PE=1 SV=2
92	224	P11530|DMD_RAT	27.58	1	1	2253100	2	2	2	Oxidation (M)
98	3893	tr|B2RYS2|B2RYS2_RAT	26.54	16	16	480600	2	2	2		13559	Cytochrome b-c1 complex subunit 7 OS=Rattus norvegicus OX=10116 GN=Uqcrb PE=1 SV=1
104	207	P11951|CX6C2_RAT	26.38	17	17	427700	2	2	2		8455	Cytochrome c oxidase subunit 6C-2 OS=Rattus norvegicus OX=10116 GN=Cox6c2 PE=1 SV=3
100	344	tr|D4A4K4|D4A4K4_RAT	26.29	0	0	341000	2	2	2	Formylation	418626	Vacuolar protein sorting 13 homolog C OS=Rattus norvegicus OX=10116 GN=Vps13c PE=1 SV=2
148	4381	tr|A0A0G2K4C6|A0A0G2K4C6_RAT	24.61	1	1	0	1	1	1		63436	Malic enzyme OS=Rattus norvegicus OX=10116 GN=Me3 PE=3 SV=1
148	4382	tr|F1M5N4|F1M5N4_RAT	24.61	1	1	0	1	1	1		67209	Malic enzyme OS=Rattus norvegicus OX=10116 GN=Me3 PE=3 SV=2
148	1308	P13697|MAOX_RAT	24.61	1	1	0	1	1	1		64003	NADP-dependent malic enzyme OS=Rattus norvegicus OX=10116 GN=Me1 PE=1 SV=2
148	4463	tr|D3ZJH9|D3ZJH9_RAT	24.61	1	1	0	1	1	1		65352	Malic enzyme OS=Rattus norvegicus OX=10116 GN=Me2 PE=1 SV=1
148	4464	tr|A0A0G2K502|A0A0G2K502_RAT	24.61	1	1	0	1	1	1		66310	Malic enzyme OS=Rattus norvegicus OX=10116 GN=Me2 PE=1 SV=1
113	12041	tr|D3Z8Q5|D3Z8Q5_RAT	24.29	6	6	293930	1	1	2		12124	RCG25747 OS=Rattus norvegicus OX=10116 GN=Tusc2 PE=4 SV=1
166	8178	tr|D4A9Z6|D4A9Z6_RAT	23.58	2	2	525070	1	1	1		36207	Mitochondrial ribosomal protein S35 OS=Rattus norvegicus OX=10116 GN=Mrps35 PE=1 SV=1
63	1269	Q5M934|TRUB1_RAT	23.08	2	2	17055000	1	1	7		36404	Probable tRNA pseudouridine synthase 1 OS=Rattus norvegicus OX=10116 GN=Trub1 PE=2 SV=1
115	12048	tr|B2RYK8|B2RYK8_RAT	22.85	1	1	5060800	1	1	2		58738	RCG28722 isoform CRA_a OS=Rattus norvegicus OX=10116 GN=Slc9b2 PE=2 SV=1
151	4466	Q58FK9|KAT3_RAT	21.61	2	2	1542900	1	1	1		51044	Kynurenine--oxoglutarate transaminase 3 OS=Rattus norvegicus OX=10116 GN=Kyat3 PE=2 SV=1
167	66	P56574|IDHP_RAT	21.49	2	2	89111	1	1	1		50967	Isocitrate dehydrogenase [NADP] mitochondrial OS=Rattus norvegicus OX=10116 GN=Idh2 PE=1 SV=2
142	3917	tr|D3ZJG4|D3ZJG4_RAT	21.33	1	1	1737900	1	1	1	Oxidation (M)	95972	Phosphofurin acidic cluster sorting protein 2 OS=Rattus norvegicus OX=10116 GN=Pacs2 PE=1 SV=2
168	3923	P80431|COX7B_RAT	21.01	14	14	116870	1	1	1		8995	Cytochrome c oxidase subunit 7B mitochondrial OS=Rattus norvegicus OX=10116 GN=Cox7b PE=1 SV=3
168	4304	tr|A0A0G2K6P0|A0A0G2K6P0_RAT	21.01	14	14	116870	1	1	1		9070	Cytochrome c oxidase subunit 7B2 OS=Rattus norvegicus OX=10116 GN=Cox7b2 PE=4 SV=1
141	11	tr|A0A140TAG5|A0A140TAG5_RAT	20.78	1	1	105060	1	1	1		67049	MICOS complex subunit MIC60 OS=Rattus norvegicus OX=10116 GN=Immt PE=1 SV=1
141	12	Q3KR86|MIC60_RAT	20.78	1	1	105060	1	1	1		67177	MICOS complex subunit Mic60 (Fragment) OS=Rattus norvegicus OX=10116 GN=Immt PE=1 SV=1
141	10	tr|A0A0G2JVH4|A0A0G2JVH4_RAT	20.78	1	1	105060	1	1	1		86230	MICOS complex subunit MIC60 OS=Rattus norvegicus OX=10116 GN=Immt PE=1 SV=1
133	310	Q75Q40|TOM40_RAT	20.09	4	4	154750	1	1	1		37919	Mitochondrial import receptor subunit TOM40 homolog OS=Rattus norvegicus OX=10116 GN=Tomm40 PE=1 SV=1
133	311	tr|G3V8F5|G3V8F5_RAT	20.09	4	4	154750	1	1	1		37920	Mitochondrial import receptor subunit TOM40 homolog OS=Rattus norvegicus OX=10116 GN=Tomm40 PE=1 SV=1
128	289	Q4KM98|MFF_RAT	20.05	3	3	0	1	1	1	Formylation	24971	Mitochondrial fission factor OS=Rattus norvegicus OX=10116 GN=Mff PE=1 SV=1
128	239	tr|A0A0H2UHM6|A0A0H2UHM6_RAT	20.05	2	2	0	1	1	1	Formylation	27523	Mitochondrial fission factor-like OS=Rattus norvegicus OX=10116 GN=LOC102556337 PE=1 SV=1
128	290	tr|A0A0G2KAL9|A0A0G2KAL9_RAT	20.05	2	2	0	1	1	1	Formylation	32801	Mitochondrial fission factor OS=Rattus norvegicus OX=10116 GN=Mff PE=1 SV=1
128	240	tr|A0A0G2K2M2|A0A0G2K2M2_RAT	20.05	2	2	0	1	1	1	Formylation	39707	Mitochondrial fission factor-like OS=Rattus norvegicus OX=10116 GN=LOC102556337 PE=1 SV=1

## Sheet: Monomer
Protein Group	Protein ID	Accession	-10lgP	Coverage (%)	Coverage (%) Sample 8	Area Sample 8	#Peptides	#Unique	#Spec Sample 8	PTM	Avg. Mass	Description
1	5	P10719|ATPB_RAT	412.63	52	52	2695600000	151	148	1008	Oxidation (M)	56354	ATP synthase subunit beta mitochondrial OS=Rattus norvegicus OX=10116 GN=Atp5f1b PE=1 SV=2
1	6	tr|G3V6D3|G3V6D3_RAT	412.63	52	52	2695600000	151	148	1008	Oxidation (M)	56345	ATP synthase subunit beta OS=Rattus norvegicus OX=10116 GN=Atp5f1b PE=1 SV=1
2	8	P15999|ATPA_RAT	351.84	44	44	1478900000	147	143	897	Carbamidomethylation
2	9	tr|F1LP05|F1LP05_RAT	351.84	44	44	1478900000	147	143	897	Carbamidomethylation
3	65	P31399|ATP5H_RAT	317.64	66	66	202760000	47	46	200	Oxidation (M)
4	63	P35435|ATPG_RAT	297.5	48	48	150090000	47	47	172	Carbamidomethylation
4	64	tr|Q6QI09|Q6QI09_RAT	297.5	22	22	150090000	47	47	172	Carbamidomethylation
5	168	P19511|AT5F1_RAT	208.61	32	32	252610000	32	31	128	Formylation	28869	ATP synthase F(0) complex subunit B1 mitochondrial OS=Rattus norvegicus OX=10116 GN=Atp5pb PE=1 SV=1
6	76	Q06647|ATPO_RAT	199.86	42	42	110810000	34	33	116	Carbamidomethylation
7	75	Q6PDU7|ATP5L_RAT	186.13	50	50	77085000	22	22	103	Oxidation (M)	11433	ATP synthase subunit g mitochondrial OS=Rattus norvegicus OX=10116 GN=Atp5mg PE=1 SV=2
9	45	P00507|AATM_RAT	175.16	17	17	7498400	13	13	32	Oxidation (M)	47314	Aspartate aminotransferase mitochondrial OS=Rattus norvegicus OX=10116 GN=Got2 PE=1 SV=2
11	12037	P21571|ATP5J_RAT	170.28	49	49	7646200	13	12	28	Oxidation (M)	12494	ATP synthase-coupling factor 6 mitochondrial OS=Rattus norvegicus OX=10116 GN=Atp5pf PE=1 SV=1
8	319	P29419|ATP5I_RAT	157.03	65	65	32188000	17	17	54	Oxidation (M)	8255	ATP synthase subunit e mitochondrial OS=Rattus norvegicus OX=10116 GN=Atp5me PE=1 SV=3
17	59	tr|D3ZFQ8|D3ZFQ8_RAT	142.67	13	13	2830900	5	5	12		35435	Cytochrome c-1 OS=Rattus norvegicus OX=10116 GN=Cyc1 PE=1 SV=3
13	29	Q60587|ECHB_RAT	131.94	14	14	2831900	12	12	20		51414	Trifunctional enzyme subunit beta mitochondrial OS=Rattus norvegicus OX=10116 GN=Hadhb PE=1 SV=1
29	58	P20788|UCRI_RAT	126.55	5	5	1295800	2	2	4		29446	Cytochrome b-c1 complex subunit Rieske mitochondrial OS=Rattus norvegicus OX=10116 GN=Uqcrfs1 PE=1 SV=2
21	200	P11240|COX5A_RAT	118.98	23	23	924190	6	6	10		16130	Cytochrome c oxidase subunit 5A mitochondrial OS=Rattus norvegicus OX=10116 GN=Cox5a PE=1 SV=1
16	233	tr|Q5UAJ5|Q5UAJ5_RAT	111.96	28	28	16963000	5	5	14	Oxidation (M)	7642	ATP synthase protein 8 OS=Rattus norvegicus OX=10116 GN=ATP8 PE=3 SV=1
16	235	tr|Q8SEZ4|Q8SEZ4_RAT	111.96	28	28	16963000	5	5	14	Oxidation (M)	7632	ATP synthase protein 8 OS=Rattus norvegicus OX=10116 GN=ATPase8 PE=3 SV=1
12	3953	tr|G3V7Y3|G3V7Y3_RAT	105.59	19	19	19124000	9	9	25		17563	ATP synthase subunit delta mitochondrial OS=Rattus norvegicus OX=10116 GN=Atp5f1d PE=1 SV=1
18	21	Q64428|ECHA_RAT	102.43	8	8	1630400	7	7	11		82665	Trifunctional enzyme subunit alpha mitochondrial OS=Rattus norvegicus OX=10116 GN=Hadha PE=1 SV=2
14	33	tr|S5RZM8|S5RZM8_RAT	99.64	27	27	3155600	8	8	17	Oxidation (M)	25958	Cytochrome c oxidase subunit 2 OS=Rattus norvegicus OX=10116 GN=COX2 PE=3 SV=1
14	34	P00406|COX2_RAT	99.64	27	27	3155600	8	8	17	Oxidation (M)	25928	Cytochrome c oxidase subunit 2 OS=Rattus norvegicus OX=10116 GN=Mtco2 PE=1 SV=3
14	28	tr|Q5UAJ6|Q5UAJ6_RAT	99.64	27	27	3155600	8	8	17	Oxidation (M)	25942	Cytochrome c oxidase subunit 2 OS=Rattus norvegicus OX=10116 GN=COX2 PE=3 SV=1
14	35	tr|Q8SEZ5|Q8SEZ5_RAT	99.64	27	27	3155600	8	8	17	Oxidation (M)	25928	Cytochrome c oxidase subunit 2 OS=Rattus norvegicus OX=10116 GN=Mt-co2 PE=1 SV=1
14	36	tr|A0A097PE04|A0A097PE04_RAT	99.64	27	27	3155600	8	8	17	Oxidation (M)	25894	Cytochrome c oxidase subunit 2 OS=Rattus norvegicus OX=10116 GN=COX2 PE=3 SV=1
43	263	P35171|CX7A2_RAT	89.33	12	12	748420	2	2	3		9353	Cytochrome c oxidase subunit 7A2 mitochondrial OS=Rattus norvegicus OX=10116 GN=Cox7a2 PE=1 SV=1
43	264	tr|B2RYS0|B2RYS0_RAT	89.33	12	12	748420	2	2	3		9353	Cox7a2 protein OS=Rattus norvegicus OX=10116 GN=Cox7a2 PE=2 SV=1
26	17	Q9ER34|ACON_RAT	79.49	3	3	441480	3	3	5		85433	Aconitate hydratase mitochondrial OS=Rattus norvegicus OX=10116 GN=Aco2 PE=1 SV=2
52	251	P80432|COX7C_RAT	78.41	21	21	895260	1	1	3		7375	Cytochrome c oxidase subunit 7C mitochondrial OS=Rattus norvegicus OX=10116 GN=Cox7c PE=1 SV=2
51	315	tr|G3V7I0|G3V7I0_RAT	77.98	8	8	974260	2	2	3		28299	Peroxiredoxin 3 OS=Rattus norvegicus OX=10116 GN=Prdx3 PE=1 SV=1
51	316	Q9Z0V6|PRDX3_RAT	77.98	8	8	974260	2	2	3		28295	Thioredoxin-dependent peroxide reductase mitochondrial OS=Rattus norvegicus OX=10116 GN=Prdx3 PE=1 SV=2
42	61	Q63704|CPT1B_RAT	77.4	2	2	581160	2	2	3		88217	Carnitine O-palmitoyltransferase 1 muscle isoform OS=Rattus norvegicus OX=10116 GN=Cpt1b PE=1 SV=1
20	50	P32551|QCR2_RAT	77.02	5	5	2756400	4	4	10		48396	Cytochrome b-c1 complex subunit 2 mitochondrial OS=Rattus norvegicus OX=10116 GN=Uqcrc2 PE=1 SV=2
10	256	tr|Q8M7G5|Q8M7G5_RAT	74.9	18	18	10682000	7	7	28	Oxidation (M)	24240	ATP synthase subunit a (Fragment) OS=Rattus norvegicus OX=10116 PE=2 SV=1
10	257	tr|Q549I0|Q549I0_RAT	74.9	18	18	10682000	7	7	28	Oxidation (M)	25050	ATP synthase subunit a OS=Rattus norvegicus OX=10116 GN=atp6 PE=4 SV=1
10	258	P05504|ATP6_RAT	74.9	18	18	10682000	7	7	28	Oxidation (M)	25076	ATP synthase subunit a OS=Rattus norvegicus OX=10116 GN=Mt-atp6 PE=1 SV=3
10	259	tr|Q8HIC7|Q8HIC7_RAT	74.9	18	18	10682000	7	7	28	Oxidation (M)	25076	ATP synthase subunit a OS=Rattus norvegicus OX=10116 GN=Mt-atp6 PE=4 SV=1
10	260	tr|S5S1E9|S5S1E9_RAT	74.9	18	18	10682000	7	7	28	Oxidation (M)	25049	ATP synthase subunit a OS=Rattus norvegicus OX=10116 GN=ATP6 PE=4 SV=1
10	262	tr|Q8SEZ3|Q8SEZ3_RAT	74.9	18	18	10682000	7	7	28	Oxidation (M)	25030	ATP synthase subunit a OS=Rattus norvegicus OX=10116 GN=ATPase6 PE=4 SV=1
77	266	tr|Q7H115|Q7H115_RAT	67.76	3	3	413690	2	2	2		29871	Cytochrome c oxidase subunit 3 OS=Rattus norvegicus OX=10116 GN=Mt-co3 PE=3 SV=1
77	267	tr|I6V4L9|I6V4L9_RAT	67.76	3	3	413690	2	2	2		29844	Cytochrome c oxidase subunit 3 OS=Rattus norvegicus OX=10116 GN=COX3 PE=3 SV=1
77	268	tr|Q8M7G4|Q8M7G4_RAT	67.76	3	3	413690	2	2	2		29861	Cytochrome c oxidase subunit 3 OS=Rattus norvegicus OX=10116 PE=2 SV=1
77	269	tr|A0A096XKT2|A0A096XKT2_RAT	67.76	3	3	413690	2	2	2		29901	Cytochrome c oxidase subunit 3 OS=Rattus norvegicus OX=10116 GN=COX3 PE=3 SV=1
77	270	P05505|COX3_RAT	67.76	3	3	413690	2	2	2		29871	Cytochrome c oxidase subunit 3 OS=Rattus norvegicus OX=10116 GN=Mtco3 PE=1 SV=5
77	271	tr|Q8SEZ2|Q8SEZ2_RAT	67.76	3	3	413690	2	2	2		29870	Cytochrome c oxidase subunit 3 (Fragment) OS=Rattus norvegicus OX=10116 GN=COIII PE=3 SV=1
22	12038	Q9JJW3|ATPMD_RAT	61.59	40	40	5667900	4	4	7		6408	ATP synthase membrane subunit DAPIT mitochondrial OS=Rattus norvegicus OX=10116 GN=Atp5md PE=1 SV=1
15	326	Q91XJ1|BECN1_RAT	57.26	3	3		3	0	17		51557	Beclin-1 OS=Rattus norvegicus OX=10116 GN=Becn1 PE=1 SV=1
70	25	Q68FY0|QCR1_RAT	53.21	4	4	895490	2	2	2		52849	Cytochrome b-c1 complex subunit 1 mitochondrial OS=Rattus norvegicus OX=10116 GN=Uqcrc1 PE=1 SV=1
72	31	P45953|ACADV_RAT	51.63	3	3	354850	2	2	2		70749	Very long-chain specific acyl-CoA dehydrogenase mitochondrial OS=Rattus norvegicus OX=10116 GN=Acadvl PE=1 SV=1
72	32	tr|Q5M9H2|Q5M9H2_RAT	51.63	3	3	354850	2	2	2		70821	Acyl-Coenzyme A dehydrogenase very long chain OS=Rattus norvegicus OX=10116 GN=Acadvl PE=1 SV=1
19	12050	D3ZAF6|ATPK_RAT	50.42	20	20	3957800	6	6	10	Oxidation (M)	10452	ATP synthase subunit f mitochondrial OS=Rattus norvegicus OX=10116 GN=Atp5mf PE=1 SV=1
24	253	P10817|CX6A2_RAT	48.06	12	12	2185100	2	2	6		10487	Cytochrome c oxidase subunit 6A2 mitochondrial (Fragment) OS=Rattus norvegicus OX=10116 GN=Cox6a2 PE=1 SV=3
24	254	tr|G3V8M4|G3V8M4_RAT	48.06	11	11	2185100	2	2	6		10802	Cytochrome c oxidase subunit 6A mitochondrial OS=Rattus norvegicus OX=10116 GN=Cox6a2 PE=3 SV=1
31	46	P09605|KCRS_RAT	46.99	7	7	403520	3	3	4		47385	Creatine kinase S-type mitochondrial OS=Rattus norvegicus OX=10116 GN=Ckmt2 PE=1 SV=2
23	420	tr|D3ZHK4|D3ZHK4_RAT	43.42	1	1		3	0	6		182226	RB1-inducible coiled-coil 1 OS=Rattus norvegicus OX=10116 GN=Rb1cc1 PE=1 SV=1
47	209	tr|B2RZD6|B2RZD6_RAT	37.86	10	10	119080	2	2	3		9327	NDUFA4 mitochondrial complex-associated OS=Rattus norvegicus OX=10116 GN=Ndufa4 PE=1 SV=1
27	12057	tr|Q64592|Q64592_RAT	37.12	6	6	0	3	1	5		32894	Delta3 delta2-enoyl-CoA isomerase OS=Rattus norvegicus OX=10116 PE=2 SV=1
64	44	P17764|THIL_RAT	35.59	3	3	426700	1	1	2		44695	Acetyl-CoA acetyltransferase mitochondrial OS=Rattus norvegicus OX=10116 GN=Acat1 PE=1 SV=1
73	66	P56574|IDHP_RAT	34.89	3	3	182340	1	1	2		50967	Isocitrate dehydrogenase [NADP] mitochondrial OS=Rattus norvegicus OX=10116 GN=Idh2 PE=1 SV=2
32	318	Q5M9I5|QCR6_RAT	34.77	17	17	864070	1	1	4		10424	Cytochrome b-c1 complex subunit 6 mitochondrial OS=Rattus norvegicus OX=10116 GN=Uqcrh PE=3 SV=1
40	410	tr|F1LNF0|F1LNF0_RAT	33.06	0	0		2	0	3		228912	Myosin heavy chain 14 OS=Rattus norvegicus OX=10116 GN=Myh14 PE=1 SV=1
71	144	P13086|SUCA_RAT	32.88	6	6	124000	2	2	2		36148	Succinate--CoA ligase [ADP/GDP-forming] subunit alpha mitochondrial OS=Rattus norvegicus OX=10116 GN=Suclg1 PE=2 SV=2
71	145	tr|A0A0H2UHE1|A0A0H2UHE1_RAT	32.88	6	6	124000	2	2	2		37560	Succinate--CoA ligase [ADP/GDP-forming] subunit alpha mitochondrial OS=Rattus norvegicus OX=10116 GN=Suclg1 PE=1 SV=1
33	8248	B0BN56|RT31_RAT	32.7	3	3		2	0	4		43962	28S ribosomal protein S31 mitochondrial OS=Rattus norvegicus OX=10116 GN=Mrps31 PE=2 SV=1
48	4381	tr|A0A0G2K4C6|A0A0G2K4C6_RAT	31.76	1	1	556350	1	1	3		63436	Malic enzyme OS=Rattus norvegicus OX=10116 GN=Me3 PE=3 SV=1
48	4382	tr|F1M5N4|F1M5N4_RAT	31.76	1	1	556350	1	1	3		67209	Malic enzyme OS=Rattus norvegicus OX=10116 GN=Me3 PE=3 SV=2
48	1308	P13697|MAOX_RAT	31.76	1	1	556350	1	1	3		64003	NADP-dependent malic enzyme OS=Rattus norvegicus OX=10116 GN=Me1 PE=1 SV=2
48	4463	tr|D3ZJH9|D3ZJH9_RAT	31.76	1	1	556350	1	1	3		65352	Malic enzyme OS=Rattus norvegicus OX=10116 GN=Me2 PE=1 SV=1
48	4464	tr|A0A0G2K502|A0A0G2K502_RAT	31.76	1	1	556350	1	1	3		66310	Malic enzyme OS=Rattus norvegicus OX=10116 GN=Me2 PE=1 SV=1
146	292	P10888|COX41_RAT	31.61	4	4	161190	1	1	1		19515	Cytochrome c oxidase subunit 4 isoform 1 mitochondrial OS=Rattus norvegicus OX=10116 GN=Cox4i1 PE=1 SV=1
41	158	Q9R1Z0|VDAC3_RAT	31.48	8	8	1639400	2	2	3	Formylation	30798	Voltage-dependent anion-selective channel protein 3 OS=Rattus norvegicus OX=10116 GN=Vdac3 PE=1 SV=2
118	403	tr|A0A0G2K401|A0A0G2K401_RAT	30.67	1	1	149390	1	1	1		79812	Propionyl-CoA carboxylase alpha chain mitochondrial OS=Rattus norvegicus OX=10116 GN=Pcca PE=1 SV=1
118	405	P14882|PCCA_RAT	30.67	1	1	149390	1	1	1		81623	Propionyl-CoA carboxylase alpha chain mitochondrial OS=Rattus norvegicus OX=10116 GN=Pcca PE=1 SV=3
118	404	tr|A0A0G2K5P9|A0A0G2K5P9_RAT	30.67	1	1	149390	1	1	1		81413	Propionyl-CoA carboxylase alpha chain mitochondrial OS=Rattus norvegicus OX=10116 GN=Pcca PE=1 SV=1
38	151	P12075|COX5B_RAT	30.38	11	11	1471800	2	2	3		13915	Cytochrome c oxidase subunit 5B mitochondrial OS=Rattus norvegicus OX=10116 GN=Cox5b PE=1 SV=2
45	1231	tr|D4A1D3|D4A1D3_RAT	30.28	0	0		2	0	3		521487	Sacsin molecular chaperone OS=Rattus norvegicus OX=10116 GN=Sacs PE=1 SV=2
56	737	tr|A0A0G2K5L6|A0A0G2K5L6_RAT	29.89	1	1	131830	2	2	2	Carbamidomethylation
56	738	tr|A0A0G2K1F2|A0A0G2K1F2_RAT	29.89	1	1	131830	2	2	2	Carbamidomethylation
56	739	tr|D3ZBE2|D3ZBE2_RAT	29.89	1	1	131830	2	2	2	Carbamidomethylation
56	740	tr|E9PSQ0|E9PSQ0_RAT	29.89	1	1	131830	2	2	2	Carbamidomethylation
56	426	tr|O70151|O70151_RAT	29.89	1	1	131830	2	2	2	Carbamidomethylation
65	8226	tr|D3Z899|D3Z899_RAT	29.6	3	3	172400	2	1	2	Formylation	61393	Mitoguardin 2 OS=Rattus norvegicus OX=10116 GN=Miga2 PE=1 SV=1
65	8227	tr|A0A0G2KAE6|A0A0G2KAE6_RAT	29.6	2	2	172400	2	1	2	Formylation	65660	Mitoguardin 2 OS=Rattus norvegicus OX=10116 GN=Miga2 PE=1 SV=1
55	647	O55207|SYNJ2_RAT	29.35	1	1	142720	2	2	3		165263	Synaptojanin-2 OS=Rattus norvegicus OX=10116 GN=Synj2 PE=1 SV=2
62	310	Q75Q40|TOM40_RAT	27.14	4	4	254150	1	1	2		37919	Mitochondrial import receptor subunit TOM40 homolog OS=Rattus norvegicus OX=10116 GN=Tomm40 PE=1 SV=1
62	311	tr|G3V8F5|G3V8F5_RAT	27.14	4	4	254150	1	1	2		37920	Mitochondrial import receptor subunit TOM40 homolog OS=Rattus norvegicus OX=10116 GN=Tomm40 PE=1 SV=1
148	321	tr|D4AE90|D4AE90_RAT	25.24	2	2	0	1	1	1	Formylation	50113	RCC1-like OS=Rattus norvegicus OX=10116 GN=Rcc1l PE=1 SV=1
79	12048	tr|B2RYK8|B2RYK8_RAT	24.95	1	1	4553600	1	1	2		58738	RCG28722 isoform CRA_a OS=Rattus norvegicus OX=10116 GN=Slc9b2 PE=2 SV=1
96	8293	P07633|PCCB_RAT	24.66	1	1	62184	1	1	1		58626	Propionyl-CoA carboxylase beta chain mitochondrial OS=Rattus norvegicus OX=10116 GN=Pccb PE=2 SV=1
96	8294	tr|Q68FZ8|Q68FZ8_RAT	24.66	1	1	62184	1	1	1		58678	Propionyl coenzyme A carboxylase beta polypeptide OS=Rattus norvegicus OX=10116 GN=Pccb PE=1 SV=1
25	1269	Q5M934|TRUB1_RAT	23.57	2	2	45150000	1	1	5		36404	Probable tRNA pseudouridine synthase 1 OS=Rattus norvegicus OX=10116 GN=Trub1 PE=2 SV=1
122	350	tr|G3V761|G3V761_RAT	23.42	4	4	0	1	1	1		16714	Interferon alpha-inducible protein 27 OS=Rattus norvegicus OX=10116 GN=Ifi27 PE=4 SV=1
122	351	tr|Q6P9X5|Q6P9X5_RAT	23.42	4	4	0	1	1	1		16682	Interferon alpha-inducible protein 27-like OS=Rattus norvegicus OX=10116 GN=Ifi27 PE=2 SV=1
120	298	tr|Q5RKL4|Q5RKL4_RAT	23.11	1	1	0	1	1	1		95977	Dimethylglycine dehydrogenase OS=Rattus norvegicus OX=10116 GN=Dmgdh PE=1 SV=1
120	299	Q63342|M2GD_RAT	23.11	1	1	0	1	1	1		96047	Dimethylglycine dehydrogenase mitochondrial OS=Rattus norvegicus OX=10116 GN=Dmgdh PE=1 SV=1
120	303	tr|A0A0G2K9Y2|A0A0G2K9Y2_RAT	23.11	1	1	0	1	1	1		98864	Dimethylglycine dehydrogenase mitochondrial OS=Rattus norvegicus OX=10116 GN=Dmgdh PE=1 SV=1
54	12095	D3Z9R8|ATP68_RAT	22.95	8	8	2296500	1	1	3		6914	ATP synthase subunit ATP5MPL mitochondrial OS=Rattus norvegicus OX=10116 GN=Atp5mpl PE=1 SV=1
54	12112	Q9WVK3|PECR_RAT	22.95	2	2	2296500	1	1	3		32433	Peroxisomal trans-2-enoyl-CoA reductase OS=Rattus norvegicus OX=10116 GN=Pecr PE=2 SV=1
54	12113	tr|A0A0G2JVG4|A0A0G2JVG4_RAT	22.95	2	2	2296500	1	1	3		32737	Peroxisomal trans-2-enoyl-CoA reductase OS=Rattus norvegicus OX=10116 GN=Pecr PE=1 SV=1
106	152	Q8VHF5|CISY_RAT	22.82	2	2	96460	1	1	1		51867	Citrate synthase mitochondrial OS=Rattus norvegicus OX=10116 GN=Cs PE=1 SV=1
106	153	tr|G3V936|G3V936_RAT	22.82	2	2	96460	1	1	1		51831	Citrate synthase OS=Rattus norvegicus OX=10116 GN=Cs PE=1 SV=1
78	18	P26284|ODPA_RAT	22.75	3	3	147040	1	1	2		43227	Pyruvate dehydrogenase E1 component subunit alpha somatic form mitochondrial OS=Rattus norvegicus OX=10116 GN=Pdha1 PE=1 SV=2
97	83	tr|A0A411P2I9|A0A411P2I9_RAT	21.45	3	3	140180	1	1	1		40144	Cytochrome b (Fragment) OS=Rattus norvegicus OX=10116 GN=Cytb PE=3 SV=1
97	84	tr|A0A0U2IDR8|A0A0U2IDR8_RAT	21.45	3	3	140180	1	1	1		40981	Cytochrome b (Fragment) OS=Rattus norvegicus OX=10116 PE=3 SV=1
97	85	tr|A0A0U2M179|A0A0U2M179_RAT	21.45	3	3	140180	1	1	1		41037	Cytochrome b (Fragment) OS=Rattus norvegicus OX=10116 PE=3 SV=1
97	86	tr|A0A411P2L0|A0A411P2L0_RAT	21.45	3	3	140180	1	1	1		41017	Cytochrome b (Fragment) OS=Rattus norvegicus OX=10116 GN=Cytb PE=3 SV=1
97	87	tr|F8QU31|F8QU31_RAT	21.45	3	3	140180	1	1	1		42181	Cytochrome b (Fragment) OS=Rattus norvegicus OX=10116 GN=cytb PE=3 SV=1
97	88	tr|A0A411P2K0|A0A411P2K0_RAT	21.45	3	3	140180	1	1	1		42238	Cytochrome b (Fragment) OS=Rattus norvegicus OX=10116 GN=Cytb PE=3 SV=1
97	89	tr|L0L4L8|L0L4L8_RAT	21.45	3	3	140180	1	1	1		42470	Cytochrome b (Fragment) OS=Rattus norvegicus OX=10116 GN=cytb PE=3 SV=1
97	90	tr|A0A140GE09|A0A140GE09_RAT	21.45	3	3	140180	1	1	1		42569	Cytochrome b (Fragment) OS=Rattus norvegicus OX=10116 PE=3 SV=1
97	91	tr|A0A140GE10|A0A140GE10_RAT	21.45	3	3	140180	1	1	1		42574	Cytochrome b (Fragment) OS=Rattus norvegicus OX=10116 PE=3 SV=1
97	92	tr|A0A140GE11|A0A140GE11_RAT	21.45	3	3	140180	1	1	1		42588	Cytochrome b (Fragment) OS=Rattus norvegicus OX=10116 PE=3 SV=1
97	93	tr|A0A140GE08|A0A140GE08_RAT	21.45	3	3	140180	1	1	1		42527	Cytochrome b (Fragment) OS=Rattus norvegicus OX=10116 PE=3 SV=1
97	95	tr|A0A385HCC9|A0A385HCC9_RAT	21.45	3	3	140180	1	1	1		42766	Cytochrome b (Fragment) OS=Rattus norvegicus OX=10116 PE=3 SV=1
97	96	tr|A0A3Q8AGE8|A0A3Q8AGE8_RAT	21.45	3	3	140180	1	1	1		42712	Cytochrome b (Fragment) OS=Rattus norvegicus OX=10116 GN=Cytb PE=3 SV=1
97	97	tr|A0A3Q8AC68|A0A3Q8AC68_RAT	21.45	3	3	140180	1	1	1		42622	Cytochrome b (Fragment) OS=Rattus norvegicus OX=10116 GN=Cytb PE=3 SV=1
97	98	tr|A0A3S6FK13|A0A3S6FK13_RAT	21.45	3	3	140180	1	1	1		42702	Cytochrome b (Fragment) OS=Rattus norvegicus OX=10116 GN=Cytb PE=3 SV=1
97	100	tr|A0A3S6FM15|A0A3S6FM15_RAT	21.45	3	3	140180	1	1	1		42698	Cytochrome b (Fragment) OS=Rattus norvegicus OX=10116 GN=Cytb PE=3 SV=1
97	101	tr|A0A097PE40|A0A097PE40_RAT	21.45	3	3	140180	1	1	1		42865	Cytochrome b OS=Rattus norvegicus OX=10116 GN=CYTB PE=3 SV=1
97	102	tr|A0A220D9Z6|A0A220D9Z6_RAT	21.45	3	3	140180	1	1	1		43018	Cytochrome b OS=Rattus norvegicus OX=10116 PE=3 SV=1
97	103	tr|D6NSP2|D6NSP2_RAT	21.45	3	3	140180	1	1	1		42945	Cytochrome b (Fragment) OS=Rattus norvegicus OX=10116 GN=cytb PE=3 SV=1
97	104	tr|D6NSS6|D6NSS6_RAT	21.45	3	3	140180	1	1	1		42993	Cytochrome b (Fragment) OS=Rattus norvegicus OX=10116 GN=cytb PE=3 SV=1
97	105	tr|Q06Q99|Q06Q99_RAT	21.45	3	3	140180	1	1	1		42997	Cytochrome b OS=Rattus norvegicus OX=10116 GN=CYB PE=3 SV=1
97	106	tr|D6NSQ3|D6NSQ3_RAT	21.45	3	3	140180	1	1	1		43012	Cytochrome b (Fragment) OS=Rattus norvegicus OX=10116 GN=cytb PE=3 SV=1
97	107	tr|D6NSR3|D6NSR3_RAT	21.45	3	3	140180	1	1	1		42986	Cytochrome b (Fragment) OS=Rattus norvegicus OX=10116 GN=cytb PE=3 SV=1
97	108	tr|D6NSP4|D6NSP4_RAT	21.45	3	3	140180	1	1	1		43016	Cytochrome b (Fragment) OS=Rattus norvegicus OX=10116 GN=cytb PE=3 SV=1
97	109	tr|D6NSQ8|D6NSQ8_RAT	21.45	3	3	140180	1	1	1		43016	Cytochrome b (Fragment) OS=Rattus norvegicus OX=10116 GN=cytb PE=3 SV=1
97	110	tr|D6NSR8|D6NSR8_RAT	21.45	3	3	140180	1	1	1		42998	Cytochrome b (Fragment) OS=Rattus norvegicus OX=10116 GN=cytb PE=3 SV=1
97	111	tr|F8QU37|F8QU37_RAT	21.45	3	3	140180	1	1	1		42992	Cytochrome b (Fragment) OS=Rattus norvegicus OX=10116 GN=cytb PE=3 SV=1
97	112	tr|F2Q6S6|F2Q6S6_RAT	21.45	3	3	140180	1	1	1		42938	Cytochrome b (Fragment) OS=Rattus norvegicus OX=10116 GN=cytb PE=3 SV=1
97	113	tr|A0A0A1FZ42|A0A0A1FZ42_RAT	21.45	3	3	140180	1	1	1		42989	Cytochrome b OS=Rattus norvegicus OX=10116 GN=CYTB PE=3 SV=1
97	114	tr|D6NSS7|D6NSS7_RAT	21.45	3	3	140180	1	1	1		42948	Cytochrome b (Fragment) OS=Rattus norvegicus OX=10116 GN=cytb PE=3 SV=1
97	115	tr|Q8SEY9|Q8SEY9_RAT	21.45	3	3	140180	1	1	1		43015	Cytochrome b OS=Rattus norvegicus OX=10116 GN=cytb PE=3 SV=1
97	116	tr|D6NSR7|D6NSR7_RAT	21.45	3	3	140180	1	1	1		42982	Cytochrome b (Fragment) OS=Rattus norvegicus OX=10116 GN=cytb PE=3 SV=1
97	117	tr|A0A220DA44|A0A220DA44_RAT	21.45	3	3	140180	1	1	1		42968	Cytochrome b OS=Rattus norvegicus OX=10116 PE=3 SV=1
97	118	tr|F2Q6S5|F2Q6S5_RAT	21.45	3	3	140180	1	1	1		42952	Cytochrome b (Fragment) OS=Rattus norvegicus OX=10116 GN=cytb PE=3 SV=1
97	119	tr|D6NSQ6|D6NSQ6_RAT	21.45	3	3	140180	1	1	1		42952	Cytochrome b (Fragment) OS=Rattus norvegicus OX=10116 GN=cytb PE=3 SV=1
97	120	tr|D6NSQ0|D6NSQ0_RAT	21.45	3	3	140180	1	1	1		42968	Cytochrome b (Fragment) OS=Rattus norvegicus OX=10116 GN=cytb PE=3 SV=1
97	121	tr|Q5UAI7|Q5UAI7_RAT	21.45	3	3	140180	1	1	1		42998	Cytochrome b OS=Rattus norvegicus OX=10116 GN=CYTB PE=3 SV=1
97	122	tr|D6NSR2|D6NSR2_RAT	21.45	3	3	140180	1	1	1		43073	Cytochrome b (Fragment) OS=Rattus norvegicus OX=10116 GN=cytb PE=3 SV=1
97	123	tr|A0A0S1Z1V9|A0A0S1Z1V9_RAT	21.45	3	3	140180	1	1	1		43002	Cytochrome b OS=Rattus norvegicus OX=10116 GN=CYTB PE=3 SV=1
97	124	tr|D6NSR1|D6NSR1_RAT	21.45	3	3	140180	1	1	1		43002	Cytochrome b (Fragment) OS=Rattus norvegicus OX=10116 GN=cytb PE=3 SV=1
97	125	tr|Q8HIC4|Q8HIC4_RAT	21.45	3	3	140180	1	1	1		43012	Cytochrome b OS=Rattus norvegicus OX=10116 GN=Mt-cyb PE=3 SV=1
97	126	tr|A0A220DA02|A0A220DA02_RAT	21.45	3	3	140180	1	1	1		42968	Cytochrome b OS=Rattus norvegicus OX=10116 PE=3 SV=1
97	127	tr|S5RKC8|S5RKC8_RAT	21.45	3	3	140180	1	1	1		42997	Cytochrome b OS=Rattus norvegicus OX=10116 GN=CYTB PE=3 SV=1
97	128	tr|A0A0S1Z1V4|A0A0S1Z1V4_RAT	21.45	3	3	140180	1	1	1		43016	Cytochrome b OS=Rattus norvegicus OX=10116 GN=CYTB PE=3 SV=1
97	130	P00159|CYB_RAT	21.45	3	3	140180	1	1	1		43012	Cytochrome b OS=Rattus norvegicus OX=10116 GN=Mt-Cyb PE=3 SV=3
97	132	tr|A0A220DA28|A0A220DA28_RAT	21.45	3	3	140180	1	1	1		42970	Cytochrome b OS=Rattus norvegicus OX=10116 PE=3 SV=1
97	133	tr|H2KXA0|H2KXA0_RAT	21.45	3	3	140180	1	1	1		42978	Cytochrome b (Fragment) OS=Rattus norvegicus OX=10116 GN=cytb PE=3 SV=1
97	134	tr|A0A096XNM4|A0A096XNM4_RAT	21.45	3	3	140180	1	1	1		43042	Cytochrome b (Fragment) OS=Rattus norvegicus OX=10116 PE=3 SV=1
97	136	tr|Q9G898|Q9G898_RAT	21.45	3	3	140180	1	1	1		42830	Cytochrome b OS=Rattus norvegicus OX=10116 PE=2 SV=1
97	94	tr|A0A385HC91|A0A385HC91_RAT	21.45	3	3	140180	1	1	1		42780	Cytochrome b (Fragment) OS=Rattus norvegicus OX=10116 PE=3 SV=1
97	99	tr|A0A385HC93|A0A385HC93_RAT	21.45	3	3	140180	1	1	1		42751	Cytochrome b (Fragment) OS=Rattus norvegicus OX=10116 PE=3 SV=1
97	129	tr|R9TKN1|R9TKN1_RAT	21.45	3	3	140180	1	1	1		43012	Cytochrome b OS=Rattus norvegicus OX=10116 GN=CYTB PE=3 SV=1
97	131	tr|L0N311|L0N311_RAT	21.45	3	3	140180	1	1	1		43045	Cytochrome b (Fragment) OS=Rattus norvegicus OX=10116 GN=cytb PE=3 SV=1
97	135	tr|D6NSP5|D6NSP5_RAT	21.45	3	3	140180	1	1	1		43012	Cytochrome b (Fragment) OS=Rattus norvegicus OX=10116 GN=cytb PE=3 SV=1
99	953	tr|D4ACE9|D4ACE9_RAT	21.16	1	1		1	0	1		103115	Alpha-aminoadipic semialdehyde synthase mitochondrial OS=Rattus norvegicus OX=10116 GN=Aass PE=1 SV=3
99	954	A2VCW9|AASS_RAT	21.16	1	1		1	0	1		102908	Alpha-aminoadipic semialdehyde synthase mitochondrial OS=Rattus norvegicus OX=10116 GN=Aass PE=2 SV=1
98	560	P28494|MA2A1_RAT	20.51	1	1	1787000	1	1	1		131242	Alpha-mannosidase 2 OS=Rattus norvegicus OX=10116 GN=Man2a1 PE=1 SV=2
74	12052	P32198|CPT1A_RAT	20.51	1	1	345910	1	1	2	Carbamidomethylation	88126	Carnitine O-palmitoyltransferase 1 liver isoform OS=Rattus norvegicus OX=10116 GN=Cpt1a PE=1 SV=2
151	23092	Q63664|KCNJ8_RAT	20.47	2	2	378300	1	1	1		47963	ATP-sensitive inward rectifier potassium channel 8 OS=Rattus norvegicus OX=10116 GN=Kcnj8 PE=1 SV=1
