# Supplementary material for: Mitochondrial F-ATP Synthase Co-Migrating Proteins and Ca2+-Dependent Formation of Large Channels
Source: Cells. 2023 Oct 7;12(19):2414. doi: 10.3390/cells12192414 (PMC10572550; doi:10.3390/cells12192414)
Supplement: Supplementary file 1 [file cells-12-02414-s001.zip › Dataset S3.xlsx]

## Sheet: Dimer
Protein Group	Protein ID	Accession	-10lgP	Coverage (%)	Coverage (%) Sample 3	Area Sample 3	#Peptides	#Unique	#Spec Sample 3	PTM	Avg. Mass	Description
2	14	P15999|ATPA_RAT	382.48	66	66	277360000	51	51	109	Y	59754	ATP synthase subunit alpha, mitochondrial OS=Rattus norvegicus OX=10116 GN=Atp5f1a PE=1 SV=2
1	7	P10719|ATPB_RAT	366.27	86	86	369900000	50	50	149	Y	56354	ATP synthase subunit beta, mitochondrial OS=Rattus norvegicus OX=10116 GN=Atp5f1b PE=1 SV=2
1	8	tr|G3V6D3|G3V6D3_RAT	366.27	86	86	369900000	50	50	149	Y	56345	ATP synthase subunit beta OS=Rattus norvegicus OX=10116 GN=Atp5f1b PE=1 SV=1
4	4	P67779|PHB_RAT	275.36	86	86	71777000	23	23	38	N	29820	Prohibitin OS=Rattus norvegicus OX=10116 GN=Phb PE=1 SV=1
3	11	Q5XIH7|PHB2_RAT	267.91	73	73	66230000	28	28	48	Y	33312	Prohibitin-2 OS=Rattus norvegicus OX=10116 GN=Phb2 PE=1 SV=1
7	2	Q02253|MMSA_RAT	242.74	48	48	23705000	21	21	30	Y	57808	Methylmalonate-semialdehyde dehydrogenase [acylating], mitochondrial OS=Rattus norvegicus OX=10116 GN=Aldh6a1 PE=1 SV=1
7	3	tr|G3V7J0|G3V7J0_RAT	242.74	48	48	23705000	21	21	30	Y	57748	Aldehyde dehydrogenase family 6, subfamily A1, isoform CRA_b OS=Rattus norvegicus OX=10116 GN=Aldh6a1 PE=1 SV=1
6	116	P35435|ATPG_RAT	229.61	57	57	513120	16	1	35	Y	30191	ATP synthase subunit gamma, mitochondrial OS=Rattus norvegicus OX=10116 GN=Atp5f1c PE=1 SV=2
5	117	tr|Q6QI09|Q6QI09_RAT	221.49	25	25	2453300	16	1	35	Y	67721	ATP synthase subunit gamma, mitochondrial OS=Rattus norvegicus OX=10116 GN=Taf3 PE=1 SV=1
10	4260	P31399|ATP5H_RAT	218.85	74	74	14806000	12	12	17	Y	18763	ATP synthase subunit d, mitochondrial OS=Rattus norvegicus OX=10116 GN=Atp5pd PE=1 SV=3
8	41	P19511|AT5F1_RAT	208.5	46	46	44029000	13	12	26	N	28869	ATP synthase F(0) complex subunit B1, mitochondrial OS=Rattus norvegicus OX=10116 GN=Atp5pb PE=1 SV=1
9	9	P00507|AATM_RAT	202.5	40	40	23694000	16	16	22	Y	47314	Aspartate aminotransferase, mitochondrial OS=Rattus norvegicus OX=10116 GN=Got2 PE=1 SV=2
12	13	P07756|CPSM_RAT	170.01	6	6	1524800	9	9	12	Y	164579	Carbamoyl-phosphate synthase [ammonia], mitochondrial OS=Rattus norvegicus OX=10116 GN=Cps1 PE=1 SV=1
16	21	Q64428|ECHA_RAT	164.25	10	10	4189000	6	6	7	N	82665	Trifunctional enzyme subunit alpha, mitochondrial OS=Rattus norvegicus OX=10116 GN=Hadha PE=1 SV=2
15	25	tr|D3ZG43|D3ZG43_RAT	158.7	22	22	2680900	5	5	8	Y	30226	NADH dehydrogenase (Ubiquinone) Fe-S protein 3 (Predicted), isoform CRA_c OS=Rattus norvegicus OX=10116 GN=Ndufs3 PE=1 SV=1
11	2163	Q06647|ATPO_RAT	158.27	49	49	17943000	10	10	14	Y	23398	ATP synthase subunit O, mitochondrial OS=Rattus norvegicus OX=10116 GN=Atp5po PE=1 SV=1
14	6	Q66HF1|NDUS1_RAT	155.91	13	13	4688500	7	7	10	N	79412	NADH-ubiquinone oxidoreductase 75 kDa subunit, mitochondrial OS=Rattus norvegicus OX=10116 GN=Ndufs1 PE=1 SV=1
13	4261	tr|G3V7Y3|G3V7Y3_RAT	146.01	61	61	24198000	7	7	11	Y	17563	ATP synthase subunit delta, mitochondrial OS=Rattus norvegicus OX=10116 GN=Atp5f1d PE=1 SV=1
22	4263	Q6PDU7|ATP5L_RAT	127.48	46	46	1928000	3	3	4	Y	11433	ATP synthase subunit g, mitochondrial OS=Rattus norvegicus OX=10116 GN=Atp5mg PE=1 SV=2
29	4270	Q9JJW3|ATPMD_RAT	126.91	38	38	2369300	3	3	3	N	6408	ATP synthase membrane subunit DAPIT, mitochondrial OS=Rattus norvegicus OX=10116 GN=Atp5md PE=1 SV=1
19	1	P32551|QCR2_RAT	125.75	17	17	2291000	5	5	6	N	48396	Cytochrome b-c1 complex subunit 2, mitochondrial OS=Rattus norvegicus OX=10116 GN=Uqcrc2 PE=1 SV=2
17	15	Q5BK63|NDUA9_RAT	121.86	16	16	701120	4	4	7	Y	42559	NADH dehydrogenase [ubiquinone] 1 alpha subcomplex subunit 9, mitochondrial OS=Rattus norvegicus OX=10116 GN=Ndufa9 PE=1 SV=2
20	33	Q561S0|NDUAA_RAT	102.64	17	17	1898400	4	4	5	Y	40493	NADH dehydrogenase [ubiquinone] 1 alpha subcomplex subunit 10, mitochondrial OS=Rattus norvegicus OX=10116 GN=Ndufa10 PE=1 SV=1
21	4264	tr|Q5UAJ5|Q5UAJ5_RAT	99.48	46	46	5060900	3	3	4	N	7642	ATP synthase protein 8 OS=Rattus norvegicus OX=10116 GN=ATP8 PE=3 SV=1
35	12	Q68FY0|QCR1_RAT	85.46	5	5	43626	2	2	2	N	52849	Cytochrome b-c1 complex subunit 1, mitochondrial OS=Rattus norvegicus OX=10116 GN=Uqcrc1 PE=1 SV=1
26	23	tr|Q5XIH3|Q5XIH3_RAT	73.84	10	10	146380	3	3	3	N	50731	NADH dehydrogenase [ubiquinone] flavoprotein 1, mitochondrial OS=Rattus norvegicus OX=10116 GN=Ndufv1 PE=1 SV=1
95	95	Q63362|NDUA5_RAT	67.98	22	22	0	1	1	1	N	13412	NADH dehydrogenase [ubiquinone] 1 alpha subcomplex subunit 5 OS=Rattus norvegicus OX=10116 GN=Ndufa5 PE=1 SV=3
24	19	P22791|HMCS2_RAT	63.14	4	4	1662400	2	2	3	N	56912	Hydroxymethylglutaryl-CoA synthase, mitochondrial OS=Rattus norvegicus OX=10116 GN=Hmgcs2 PE=1 SV=1
24	20	tr|Q68G44|Q68G44_RAT	63.14	4	4	1662400	2	2	3	N	56886	3-hydroxy-3-methylglutaryl coenzyme A synthase OS=Rattus norvegicus OX=10116 GN=Hmgcs2 PE=1 SV=1
28	4266	D3ZAF6|ATPK_RAT	52.4	30	30	3083900	3	3	3	Y	10452	ATP synthase subunit f, mitochondrial OS=Rattus norvegicus OX=10116 GN=Atp5mf PE=1 SV=1
96	42	tr|D4A565|D4A565_RAT	50.27	12	12	69212	1	1	1	N	21664	NADH dehydrogenase (Ubiquinone) 1 beta subcomplex, 5 (Predicted), isoform CRA_b OS=Rattus norvegicus OX=10116 GN=Ndufb5 PE=1 SV=1
36	109	P11240|COX5A_RAT	49.51	21	21	29933	1	1	2	N	16130	Cytochrome c oxidase subunit 5A, mitochondrial OS=Rattus norvegicus OX=10116 GN=Cox5a PE=1 SV=1
97	29	tr|D4A0T0|D4A0T0_RAT	41.71	8	8	282740	1	1	1	N	20859	NADH:ubiquinone oxidoreductase subunit B10 OS=Rattus norvegicus OX=10116 GN=Ndufb10 PE=1 SV=1
98	4272	tr|M0R601|M0R601_RAT	39.16	16	16	437370	1	1	1	N	5582	Uncharacterized protein OS=Rattus norvegicus OX=10116 PE=4 SV=2
98	4273	P29418|ATP5E_RAT	39.16	16	16	437370	1	1	1	N	5767	ATP synthase subunit epsilon, mitochondrial OS=Rattus norvegicus OX=10116 GN=Atp5f1e PE=1 SV=2
37	77	tr|Q06QK5|Q06QK5_RAT	38.16	2	2	636560	1	1	2	N	68606	NADH-ubiquinone oxidoreductase chain 5 OS=Rattus norvegicus OX=10116 GN=ND5 PE=3 SV=1
37	81	P11661|NU5M_RAT	38.16	2	2	636560	1	1	2	N	68618	NADH-ubiquinone oxidoreductase chain 5 OS=Rattus norvegicus OX=10116 GN=Mtnd5 PE=3 SV=3
37	82	tr|Q06QG6|Q06QG6_RAT	38.16	2	2	636560	1	1	2	N	68588	NADH-ubiquinone oxidoreductase chain 5 OS=Rattus norvegicus OX=10116 GN=ND5 PE=3 SV=1
37	83	tr|Q06QA1|Q06QA1_RAT	38.16	2	2	636560	1	1	2	N	68574	NADH-ubiquinone oxidoreductase chain 5 OS=Rattus norvegicus OX=10116 GN=ND5 PE=3 SV=1
37	76	tr|A7XYD5|A7XYD5_RAT	38.16	2	2	636560	1	1	2	N	68856	NADH-ubiquinone oxidoreductase chain 5 OS=Rattus norvegicus OX=10116 GN=Nd5 PE=3 SV=1
37	78	tr|Q8SEZ0|Q8SEZ0_RAT	38.16	2	2	636560	1	1	2	N	68618	NADH-ubiquinone oxidoreductase chain 5 OS=Rattus norvegicus OX=10116 GN=Mt-nd5 PE=3 SV=1
37	79	tr|A0A096XKT9|A0A096XKT9_RAT	38.16	2	2	636560	1	1	2	N	68584	NADH-ubiquinone oxidoreductase chain 5 OS=Rattus norvegicus OX=10116 GN=ND5 PE=3 SV=1
37	80	tr|A7XYC1|A7XYC1_RAT	38.16	2	2	636560	1	1	2	N	68841	NADH-ubiquinone oxidoreductase chain 5 OS=Rattus norvegicus OX=10116 GN=Nd5 PE=3 SV=1
37	84	tr|A0A0A1FZN8|A0A0A1FZN8_RAT	38.16	2	2	636560	1	1	2	N	68970	NADH-ubiquinone oxidoreductase chain 5 OS=Rattus norvegicus OX=10116 GN=ND5 PE=3 SV=1
18	179	F1M775|DIAP1_RAT	36.06	2	2	2036300	3	2	6	Y	140418	Protein diaphanous homolog 1 OS=Rattus norvegicus OX=10116 GN=Diaph1 PE=1 SV=3
38	4275	tr|D3ZA45|D3ZA45_RAT	35.36	2	2	780470	1	1	2	N	52491	Autophagy-related protein 13 OS=Rattus norvegicus OX=10116 GN=Atg13 PE=1 SV=2
99	34	tr|Q5RJN0|Q5RJN0_RAT	34.81	6	6	196860	1	1	1	N	23945	NADH dehydrogenase (Ubiquinone) Fe-S protein 7 OS=Rattus norvegicus OX=10116 GN=Ndufs7 PE=1 SV=1
100	22	P19234|NDUV2_RAT	33.1	5	5	2019900	1	1	1	N	27378	NADH dehydrogenase [ubiquinone] flavoprotein 2, mitochondrial OS=Rattus norvegicus OX=10116 GN=Ndufv2 PE=1 SV=2
47	53	P52873|PYC_RAT	32.92	2	2	312410	1	1	1	N	129777	Pyruvate carboxylase, mitochondrial OS=Rattus norvegicus OX=10116 GN=Pc PE=1 SV=2
47	54	tr|A0A0G2JTL5|A0A0G2JTL5_RAT	32.92	2	2	312410	1	1	1	N	140005	Pyruvate carboxylase, mitochondrial OS=Rattus norvegicus OX=10116 GN=Pc PE=1 SV=1
101	157	tr|F1LTG5|F1LTG5_RAT	32.32	14	14	493200	1	1	1	N	13829	Cytochrome c oxidase subunit 5B, mitochondrial
101	158	P12075|COX5B_RAT	32.32	14	14	493200	1	1	1	N	13915	Cytochrome c oxidase subunit 5B, mitochondrial OS=Rattus norvegicus OX=10116 GN=Cox5b PE=1 SV=2
25	369	P11530|DMD_RAT	30.6	0	0	1032100	2	2	3	Y	425830	Dystrophin OS=Rattus norvegicus OX=10116 GN=Dmd PE=1 SV=2
39	4278	tr|A0A0U1RRQ6|A0A0U1RRQ6_RAT	27.67	3	3	1497800	1	1	2	Y	35344	Solute carrier family 25, member 44 OS=Rattus norvegicus OX=10116 GN=Slc25a44 PE=1 SV=1
39	4279	tr|D3ZSN7|D3ZSN7_RAT	27.67	2	2	1497800	1	1	2	Y	37879	Similar to CG5805-PA (Predicted), isoform CRA_a OS=Rattus norvegicus OX=10116 GN=Slc25a44 PE=1 SV=1
30	390	tr|O70151|O70151_RAT	44161	1	1	0	2	2	2	Y	276097	Acetyl-CoA carboxylase OS=Rattus norvegicus OX=10116 GN=Acacb PE=2 SV=1
105	2187	Q06645|AT5G1_RAT	25.94	5	5	3196100	1	1	1	N	14244	ATP synthase F(0) complex subunit C1, mitochondrial OS=Rattus norvegicus OX=10116 GN=Atp5mc1 PE=1 SV=1
105	2189	tr|Q499S2|Q499S2_RAT	25.94	5	5	3196100	1	1	1	N	14745	ATP synthase F(0) complex subunit C3, mitochondrial OS=Rattus norvegicus OX=10116 GN=Atp5mc3 PE=2 SV=1
105	2188	Q06646|AT5G2_RAT	25.94	5	5	3196100	1	1	1	N	14918	ATP synthase F(0) complex subunit C2, mitochondrial OS=Rattus norvegicus OX=10116 GN=Atp5mc2 PE=1 SV=1
105	2190	Q71S46|AT5G3_RAT	25.94	5	5	3196100	1	1	1	N	14693	ATP synthase F(0) complex subunit C3, mitochondrial OS=Rattus norvegicus OX=10116 GN=Atp5mc3 PE=1 SV=1
105	2191	tr|A0A0G2JTN8|A0A0G2JTN8_RAT	25.94	5	5	3196100	1	1	1	N	15465	ATP synthase F(0) complex subunit C2, mitochondrial OS=Rattus norvegicus OX=10116 GN=Atp5mc2 PE=3 SV=1
108	2238	tr|B5DFK5|B5DFK5_RAT	24.34	1	1	0	1	1	1	Y	119424	Hip1r protein OS=Rattus norvegicus OX=10116 GN=Hip1r PE=2 SV=1
108	2240	tr|F1LML7|F1LML7_RAT	24.34	1	1	0	1	1	1	Y	119553	Huntingtin-interacting protein 1-related OS=Rattus norvegicus OX=10116 GN=Hip1r PE=1 SV=1
108	2241	tr|Q99PW9|Q99PW9_RAT	24.34	1	1	0	1	1	1	Y	120572	Huntingtin interacting protein 1 related (Fragment) OS=Rattus norvegicus OX=10116 GN=Hip1r PE=2 SV=1
45	140	tr|F1LPI6|F1LPI6_RAT	44067	0	0	0	1	1	2	N	200075	Peripheral-type benzodiazepine receptor-associated protein 1 OS=Rattus norvegicus OX=10116 GN=Tspoap1 PE=4 SV=1
45	141	Q9JIR0|RIMB1_RAT	44067	0	0	0	1	1	2	N	200202	Peripheral-type benzodiazepine receptor-associated protein 1 OS=Rattus norvegicus OX=10116 GN=Tspoap1 PE=1 SV=2
111	51	P10888|COX41_RAT	43914	4	4	0	1	1	1	N	19515	Cytochrome c oxidase subunit 4 isoform 1, mitochondrial OS=Rattus norvegicus OX=10116 GN=Cox4i1 PE=1 SV=1
59	283	tr|F1MAR6|F1MAR6_RAT	23.86	1	1	0	1	1	1	N	68095	Proline dehydrogenase OS=Rattus norvegicus OX=10116 GN=Prodh1 PE=1 SV=2
110	38	tr|D4A3V2|D4A3V2_RAT	23.69	8	8	134410	1	1	1	N	15224	NADH dehydrogenase [ubiquinone] 1 alpha subcomplex subunit 6 OS=Rattus norvegicus OX=10116 GN=Ndufa6 PE=1 SV=1
112	164	Q5M9G9|FAKD4_RAT	23.5	1	1	0	1	1	1	N	71181	FAST kinase domain-containing protein 4 OS=Rattus norvegicus OX=10116 GN=Tbrg4 PE=2 SV=1
116	2199	Q32Q86|CRY1_RAT	23.13	1	1	1294500	1	1	1	N	66231	Cryptochrome-1 OS=Rattus norvegicus OX=10116 GN=Cry1 PE=1 SV=1
48	2554	tr|F1M4Y5|F1M4Y5_RAT	22.83	1	1	7464100	1	1	1	Y	108218	Storkhead box 1 OS=Rattus norvegicus OX=10116 GN=Stox1 PE=4 SV=2
48	2544	tr|A0A0G2K418|A0A0G2K418_RAT	22.83	1	1	7464100	1	1	1	Y	96381	Storkhead box 1 OS=Rattus norvegicus OX=10116 GN=Stox1 PE=4 SV=1
115	4293	Q63449|PRGR_RAT	22.77	1	1	0	1	1	1	N	99408	Progesterone receptor OS=Rattus norvegicus OX=10116 GN=Pgr PE=2 SV=1
113	4292	B0K035|MTFR2_RAT	22.71	7	7	2025700	1	1	1	Y	40772	Mitochondrial fission regulator 2 OS=Rattus norvegicus OX=10116 GN=Mtfr2 PE=2 SV=1
114	435	Q5XIJ9|SCO2A_RAT	22.7	4	4	0	1	1	1	Y	56900	Succinyl-CoA:3-ketoacid coenzyme A transferase 2A, mitochondrial OS=Rattus norvegicus OX=10116 GN=Oxct2a PE=1 SV=1
117	2443	tr|A0A0G2JWL4|A0A0G2JWL4_RAT	22.25	4	4	30417	1	1	1	Y	68423	FA complementation group G OS=Rattus norvegicus OX=10116 GN=Fancg PE=4 SV=1
119	52	tr|B0BNE6|B0BNE6_RAT	21.84	4	4	0	1	1	1	N	23970	NADH dehydrogenase (Ubiquinone) Fe-S protein 8 (Predicted), isoform CRA_a OS=Rattus norvegicus OX=10116 GN=Ndufs8 PE=1 SV=1
93	4365	tr|A0A0G2K1N9|A0A0G2K1N9_RAT	20.81	1	1	1525500	1	1	1	N	74235	Selenoprotein O OS=Rattus norvegicus OX=10116 GN=Selenoo PE=1 SV=1
93	4366	tr|B2GVA1|B2GVA1_RAT	20.81	1	1	1525500	1	1	1	N	74385	Selenoprotein O OS=Rattus norvegicus OX=10116 GN=Selenoo PE=2 SV=1
126	4307	Q1HCL7|NAKD2_RAT	20.57	1	1	0	1	1	1	N	48116	NAD kinase 2, mitochondrial OS=Rattus norvegicus OX=10116 GN=Nadk2 PE=1 SV=1
123	4302	tr|D4A676|D4A676_RAT	20.48	4	4	646040	1	1	1	N	24898	GrpE protein homolog OS=Rattus norvegicus OX=10116 GN=Grpel2 PE=3 SV=1
124	2566	tr|F1LSY7|F1LSY7_RAT	20.24	1	1	11066000	1	1	1	Y	109031	Endoplasmic reticulum to nucleus-signaling 1 OS=Rattus norvegicus OX=10116 GN=Ern1 PE=4 SV=2
124	2567	tr|A0A0G2K2H4|A0A0G2K2H4_RAT	20.24	1	1	11066000	1	1	1	Y	110150	Endoplasmic reticulum to nucleus-signaling 1 OS=Rattus norvegicus OX=10116 GN=Ern1 PE=2 SV=1
44	4305	tr|G3V8G1|G3V8G1_RAT	20.2	1	1	2305300	1	1	2	Y	137113	ATP/GTP binding protein 1 (Predicted), isoform CRA_a OS=Rattus norvegicus OX=10116 GN=Agtpbp1 PE=4 SV=1
total 85 proteins

## Sheet: Monomer
Protein Group	Protein ID	Accession	-10lgP	Coverage (%)	Coverage (%) Sample 7	Area Sample 7	#Peptides	#Unique	#Spec Sample 7	PTM	Avg. Mass	Description
2	14	P15999|ATPA_RAT	432.09	77	77	2723700000	104	104	270	Y	59754	ATP synthase subunit alpha, mitochondrial OS=Rattus norvegicus OX=10116 GN=Atp5f1a PE=1 SV=2
3	53	P52873|PYC_RAT	423.33	69	69	485200000	89	87	137	Y	129777	Pyruvate carboxylase, mitochondrial OS=Rattus norvegicus OX=10116 GN=Pc PE=1 SV=2
3	54	tr|A0A0G2JTL5|A0A0G2JTL5_RAT	423.33	64	64	485200000	89	87	137	Y	140005	Pyruvate carboxylase, mitochondrial OS=Rattus norvegicus OX=10116 GN=Pc PE=1 SV=1
1	7	P10719|ATPB_RAT	408.87	82	82	3460600000	84	83	301	Y	56354	ATP synthase subunit beta, mitochondrial OS=Rattus norvegicus OX=10116 GN=Atp5f1b PE=1 SV=2
1	8	tr|G3V6D3|G3V6D3_RAT	408.87	82	82	3460600000	84	83	301	Y	56345	ATP synthase subunit beta OS=Rattus norvegicus OX=10116 GN=Atp5f1b PE=1 SV=1
5	4260	P31399|ATP5H_RAT	358.66	93	93	461400000	40	40	67	Y	18763	ATP synthase subunit d, mitochondrial OS=Rattus norvegicus OX=10116 GN=Atp5pd PE=1 SV=3
10	21	Q64428|ECHA_RAT	348.58	45	45	94713000	36	36	48	Y	82665	Trifunctional enzyme subunit alpha, mitochondrial OS=Rattus norvegicus OX=10116 GN=Hadha PE=1 SV=2
6	13	P07756|CPSM_RAT	335.39	32	32	99521000	38	37	53	Y	164579	Carbamoyl-phosphate synthase [ammonia], mitochondrial OS=Rattus norvegicus OX=10116 GN=Cps1 PE=1 SV=1
9	6796	P04762|CATA_RAT	325.85	71	71	159850000	34	33	48	Y	59757	Catalase OS=Rattus norvegicus OX=10116 GN=Cat PE=1 SV=3
8	116	P35435|ATPG_RAT	283.13	68	68	222780000	29	29	50	Y	30191	ATP synthase subunit gamma, mitochondrial OS=Rattus norvegicus OX=10116 GN=Atp5f1c PE=1 SV=2
12	9	P00507|AATM_RAT	281.21	64	64	95293000	25	25	35	Y	47314	Aspartate aminotransferase, mitochondrial OS=Rattus norvegicus OX=10116 GN=Got2 PE=1 SV=2
4	41	P19511|AT5F1_RAT	277.66	71	71	460220000	31	30	71	Y	28869	ATP synthase F(0) complex subunit B1, mitochondrial OS=Rattus norvegicus OX=10116 GN=Atp5pb PE=1 SV=1
21	19	P22791|HMCS2_RAT	262.65	32	32	21445000	16	16	16	Y	56912	Hydroxymethylglutaryl-CoA synthase, mitochondrial OS=Rattus norvegicus OX=10116 GN=Hmgcs2 PE=1 SV=1
21	20	tr|Q68G44|Q68G44_RAT	262.65	32	32	21445000	16	16	16	Y	56886	3-hydroxy-3-methylglutaryl coenzyme A synthase OS=Rattus norvegicus OX=10116 GN=Hmgcs2 PE=1 SV=1
7	4261	tr|G3V7Y3|G3V7Y3_RAT	256.07	82	82	658280000	20	20	52	Y	17563	ATP synthase subunit delta, mitochondrial OS=Rattus norvegicus OX=10116 GN=Atp5f1d PE=1 SV=1
11	2163	Q06647|ATPO_RAT	255.64	76	76	507150000	27	27	45	Y	23398	ATP synthase subunit O, mitochondrial OS=Rattus norvegicus OX=10116 GN=Atp5po PE=1 SV=1
15	85	tr|A0A0G2JVH4|A0A0G2JVH4_RAT	248.58	25	25	10599000	20	20	20	Y	86230	MICOS complex subunit MIC60 OS=Rattus norvegicus OX=10116 GN=Immt PE=1 SV=1
13	40	Q60587|ECHB_RAT	243.61	37	37	25243000	20	20	24	Y	51414	Trifunctional enzyme subunit beta, mitochondrial OS=Rattus norvegicus OX=10116 GN=Hadhb PE=1 SV=1
16	2302	P16970|ABCD3_RAT	241.35	27	27	18504000	15	15	20	Y	75316	ATP-binding cassette sub-family D member 3 OS=Rattus norvegicus OX=10116 GN=Abcd3 PE=1 SV=3
14	2	Q02253|MMSA_RAT	240.93	47	47	38664000	18	18	24	Y	57808	Methylmalonate-semialdehyde dehydrogenase [acylating], mitochondrial OS=Rattus norvegicus OX=10116 GN=Aldh6a1 PE=1 SV=1
14	3	tr|G3V7J0|G3V7J0_RAT	240.93	47	47	38664000	18	18	24	Y	57748	Aldehyde dehydrogenase family 6, subfamily A1, isoform CRA_b OS=Rattus norvegicus OX=10116 GN=Aldh6a1 PE=1 SV=1
17	12	Q68FY0|QCR1_RAT	239.36	43	43	22165000	14	14	20	Y	52849	Cytochrome b-c1 complex subunit 1, mitochondrial OS=Rattus norvegicus OX=10116 GN=Uqcrc1 PE=1 SV=1
19	1	P32551|QCR2_RAT	237.64	45	45	35141000	15	15	17	N	48396	Cytochrome b-c1 complex subunit 2, mitochondrial OS=Rattus norvegicus OX=10116 GN=Uqcrc2 PE=1 SV=2
20	4373	P0C2X9|AL4A1_RAT	233.98	34	34	47000000	13	13	16	Y	61869	Delta-1-pyrroline-5-carboxylate dehydrogenase, mitochondrial OS=Rattus norvegicus OX=10116 GN=Aldh4a1 PE=1 SV=1
29	542	P10860|DHE3_RAT	224.76	20	20	6627100	8	8	9	N	61416	Glutamate dehydrogenase 1, mitochondrial OS=Rattus norvegicus OX=10116 GN=Glud1 PE=1 SV=2
18	9289	P24329|THTR_RAT	224.6	40	40	56148000	14	14	19	Y	33407	Thiosulfate sulfurtransferase OS=Rattus norvegicus OX=10116 GN=Tst PE=1 SV=3
24	229	A2VCW9|AASS_RAT	217.43	15	15	780490	13	1	15	N	102908	Alpha-aminoadipic semialdehyde synthase, mitochondrial OS=Rattus norvegicus OX=10116 GN=Aass PE=2 SV=1
27	35	P13086|SUCA_RAT	213.6	29	29	8325500	11	11	12	Y	36148	Succinate--CoA ligase [ADP/GDP-forming] subunit alpha, mitochondrial OS=Rattus norvegicus OX=10116 GN=Suclg1 PE=2 SV=2
27	36	tr|A0A0H2UHE1|A0A0H2UHE1_RAT	213.6	28	28	8325500	11	11	12	Y	37560	Succinate--CoA ligase [ADP/GDP-forming] subunit alpha, mitochondrial OS=Rattus norvegicus OX=10116 GN=Suclg1 PE=1 SV=1
23	228	tr|D4ACE9|D4ACE9_RAT	212.29	15	15	1908500	13	1	15	Y	103115	Alpha-aminoadipic semialdehyde synthase, mitochondrial OS=Rattus norvegicus OX=10116 GN=Aass PE=1 SV=3
28	39	P17764|THIL_RAT	208.41	24	24	13235000	8	8	11	N	44695	Acetyl-CoA acetyltransferase, mitochondrial OS=Rattus norvegicus OX=10116 GN=Acat1 PE=1 SV=1
26	4263	Q6PDU7|ATP5L_RAT	197.76	89	89	83153000	7	7	13	Y	11433	ATP synthase subunit g, mitochondrial OS=Rattus norvegicus OX=10116 GN=Atp5mg PE=1 SV=2
32	289	P07872|ACOX1_RAT	188.9	11	11	3079100	7	7	7	Y	74679	Peroxisomal acyl-coenzyme A oxidase 1 OS=Rattus norvegicus OX=10116 GN=Acox1 PE=1 SV=1
30	4602	B3DMA2|ACD11_RAT	182.87	11	11	7627400	8	8	8	Y	87371	Acyl-CoA dehydrogenase family member 11 OS=Rattus norvegicus OX=10116 GN=Acad11 PE=1 SV=1
33	4338	P63039|CH60_RAT	170.4	16	16	2991300	7	6	7	N	60956	60 kDa heat shock protein, mitochondrial OS=Rattus norvegicus OX=10116 GN=Hspd1 PE=1 SV=1
33	4339	tr|A0A482IDN3|A0A482IDN3_RAT	170.4	16	16	2991300	7	6	7	N	60956	Hsp60 OS=Rattus norvegicus OX=10116 GN=Hspd1 PE=2 SV=1
36	13889	P21571|ATP5J_RAT	169.58	37	37	11661000	5	5	6	N	12494	ATP synthase-coupling factor 6, mitochondrial OS=Rattus norvegicus OX=10116 GN=Atp5pf PE=1 SV=1
31	13896	D3Z9R8|ATP68_RAT	159.56	37	37	12692000	5	5	7	Y	6914	ATP synthase subunit ATP5MPL, mitochondrial OS=Rattus norvegicus OX=10116 GN=Atp5mpl PE=1 SV=1
34	28	tr|D3ZFQ8|D3ZFQ8_RAT	142.12	14	14	6386600	5	5	7	N	35435	Cytochrome c-1 OS=Rattus norvegicus OX=10116 GN=Cyc1 PE=1 SV=3
37	51	P10888|COX41_RAT	141.37	30	30	6270700	5	5	6	N	19515	Cytochrome c oxidase subunit 4 isoform 1, mitochondrial OS=Rattus norvegicus OX=10116 GN=Cox4i1 PE=1 SV=1
42	4264	tr|Q5UAJ5|Q5UAJ5_RAT	140.51	55	55	96459000	4	4	5	Y	7642	ATP synthase protein 8 OS=Rattus norvegicus OX=10116 GN=ATP8 PE=3 SV=1
39	9290	P04636|MDHM_RAT	137.22	19	19	3989000	5	5	6	Y	35684	Malate dehydrogenase, mitochondrial OS=Rattus norvegicus OX=10116 GN=Mdh2 PE=1 SV=2
22	6960	P29419|ATP5I_RAT	136	69	69	80884000	12	11	16	N	8255	ATP synthase subunit e, mitochondrial OS=Rattus norvegicus OX=10116 GN=Atp5me PE=1 SV=3
40	4270	Q9JJW3|ATPMD_RAT	134.56	45	45	56515000	3	3	6	N	6408	ATP synthase membrane subunit DAPIT, mitochondrial OS=Rattus norvegicus OX=10116 GN=Atp5md PE=1 SV=1
25	4266	D3ZAF6|ATPK_RAT	128.8	56	56	78115000	10	9	13	Y	10452	ATP synthase subunit f, mitochondrial OS=Rattus norvegicus OX=10116 GN=Atp5mf PE=1 SV=1
35	4857	P32198|CPT1A_RAT	127.43	10	10	3293100	5	5	6	Y	88126	Carnitine O-palmitoyltransferase 1, liver isoform OS=Rattus norvegicus OX=10116 GN=Cpt1a PE=1 SV=2
41	278	tr|D3ZFJ6|D3ZFJ6_RAT	126.49	15	15	7551900	4	4	5	N	60420	Lactamase, beta OS=Rattus norvegicus OX=10116 GN=Lactb PE=1 SV=1
47	106	tr|G3V6I4|G3V6I4_RAT	124.05	12	12	4104600	2	2	4	N	37791	Mitochondrial amidoxime reducing component 1 OS=Rattus norvegicus OX=10116 GN=Marc1 PE=1 SV=1
57	4472	P45953|ACADV_RAT	123.85	6	6	1443600	3	3	3	N	70749	Very long-chain specific acyl-CoA dehydrogenase, mitochondrial OS=Rattus norvegicus OX=10116 GN=Acadvl PE=1 SV=1
57	4473	tr|Q5M9H2|Q5M9H2_RAT	123.85	6	6	1443600	3	3	3	N	70821	Acyl-Coenzyme A dehydrogenase, very long chain OS=Rattus norvegicus OX=10116 GN=Acadvl PE=1 SV=1
45	98	P29147|BDH_RAT	122.39	13	13	4000100	4	4	4	N	38202	D-beta-hydroxybutyrate dehydrogenase, mitochondrial OS=Rattus norvegicus OX=10116 GN=Bdh1 PE=1 SV=2
45	99	tr|A0A0G2JSH2|A0A0G2JSH2_RAT	122.39	13	13	4000100	4	4	4	N	38333	3-hydroxybutyrate dehydrogenase, type 1, isoform CRA_a OS=Rattus norvegicus OX=10116 GN=Bdh1 PE=1 SV=1
66	13899	Q5XIC2|ECSIT_RAT	118.41	8	8	991930	2	2	2	Y	49620	Evolutionarily conserved signaling intermediate in Toll pathway, mitochondrial OS=Rattus norvegicus OX=10116 GN=Ecsit PE=1 SV=1
59	9321	tr|Q5EBA4|Q5EBA4_RAT	115.77	7	7	1666300	3	3	3	N	33215	Nipsnap1 protein (Fragment) OS=Rattus norvegicus OX=10116 GN=Nipsnap1 PE=2 SV=1
59	9322	tr|G3V728|G3V728_RAT	115.77	7	7	1666300	3	3	3	N	33346	4-nitrophenylphosphatase domain and non-neuronal SNAP25-like protein homolog 1 (C. elegans), isoform CRA_b OS=Rattus norvegicus OX=10116 GN=Nipsnap1 PE=1 SV=1
71	37	P20788|UCRI_RAT	115.38	18	18	1933300	2	2	2	N	29446	Cytochrome b-c1 complex subunit Rieske, mitochondrial OS=Rattus norvegicus OX=10116 GN=Uqcrfs1 PE=1 SV=2
43	110	Q9WVK7|HCDH_RAT	113.73	16	16	1933000	3	3	4	N	34448	Hydroxyacyl-coenzyme A dehydrogenase, mitochondrial OS=Rattus norvegicus OX=10116 GN=Hadh PE=2 SV=1
73	93	tr|A0A0G2K8Q8|A0A0G2K8Q8_RAT	110.17	39	39	1652700	2	2	2	N	7099	Ubiquinol-cytochrome c reductase, complex III subunit X OS=Rattus norvegicus OX=10116 GN=Uqcr10 PE=1 SV=1
73	94	tr|B2RYX1|B2RYX1_RAT	110.17	38	38	1652700	2	2	2	N	7462	LOC685322 protein OS=Rattus norvegicus OX=10116 GN=Uqcr10 PE=2 SV=1
54	2174	O70351|HCD2_RAT	109.85	22	22	4123800	3	3	3	N	27246	3-hydroxyacyl-CoA dehydrogenase type-2 OS=Rattus norvegicus OX=10116 GN=Hsd17b10 PE=1 SV=3
54	2175	tr|B0BMW2|B0BMW2_RAT	109.85	22	22	4123800	3	3	3	N	27250	3-hydroxyacyl-CoA dehydrogenase type-2 OS=Rattus norvegicus OX=10116 GN=Hsd17b10 PE=1 SV=1
63	2188	Q06646|AT5G2_RAT	109.43	27	27	10200000	2	2	2	N	14918	ATP synthase F(0) complex subunit C2, mitochondrial OS=Rattus norvegicus OX=10116 GN=Atp5mc2 PE=1 SV=1
63	2187	Q06645|AT5G1_RAT	109.43	28	28	10200000	2	2	2	N	14244	ATP synthase F(0) complex subunit C1, mitochondrial OS=Rattus norvegicus OX=10116 GN=Atp5mc1 PE=1 SV=1
63	2189	tr|Q499S2|Q499S2_RAT	109.43	27	27	10200000	2	2	2	N	14745	ATP synthase F(0) complex subunit C3, mitochondrial OS=Rattus norvegicus OX=10116 GN=Atp5mc3 PE=2 SV=1
63	2190	Q71S46|AT5G3_RAT	109.43	27	27	10200000	2	2	2	N	14693	ATP synthase F(0) complex subunit C3, mitochondrial OS=Rattus norvegicus OX=10116 GN=Atp5mc3 PE=1 SV=1
60	109	P11240|COX5A_RAT	107.55	30	30	8579600	3	2	3	N	16130	Cytochrome c oxidase subunit 5A, mitochondrial OS=Rattus norvegicus OX=10116 GN=Cox5a PE=1 SV=1
49	13895	B1WC61|ACAD9_RAT	102.09	6	6	867700	2	2	3	N	68843	Complex I assembly factor ACAD9, mitochondrial OS=Rattus norvegicus OX=10116 GN=Acad9 PE=1 SV=1
38	4273	P29418|ATP5E_RAT	101.81	69	69	38088000	5	5	6	Y	5767	ATP synthase subunit epsilon, mitochondrial OS=Rattus norvegicus OX=10116 GN=Atp5f1e PE=1 SV=2
56	13890	P05504|ATP6_RAT	99.6	18	18	4736200	3	3	3	Y	25076	ATP synthase subunit a OS=Rattus norvegicus OX=10116 GN=Mt-atp6 PE=1 SV=3
56	13891	tr|Q8HIC7|Q8HIC7_RAT	99.6	18	18	4736200	3	3	3	Y	25076	ATP synthase subunit a OS=Rattus norvegicus OX=10116 GN=Mt-atp6 PE=4 SV=1
56	13892	tr|S5S1E9|S5S1E9_RAT	99.6	18	18	4736200	3	3	3	Y	25049	ATP synthase subunit a OS=Rattus norvegicus OX=10116 GN=ATP6 PE=4 SV=1
56	13893	tr|Q06QE5|Q06QE5_RAT	99.6	18	18	4736200	3	3	3	Y	25075	ATP synthase subunit a OS=Rattus norvegicus OX=10116 GN=ATP6 PE=4 SV=1
56	13894	tr|Q8SEZ3|Q8SEZ3_RAT	99.6	18	18	4736200	3	3	3	Y	25030	ATP synthase subunit a OS=Rattus norvegicus OX=10116 GN=ATPase6 PE=4 SV=1
50	603	A0A0G2K047|ACSS3_RAT	98.87	3	3	1012600	2	2	3	N	74675	Acyl-CoA synthetase short-chain family member 3, mitochondrial OS=Rattus norvegicus OX=10116 GN=Acss3 PE=1 SV=1
102	178	P62909|RS3_RAT	96.06	11	11	1123600	1	1	1	N	26674	40S ribosomal protein S3 OS=Rattus norvegicus OX=10116 GN=Rps3 PE=1 SV=1
51	11723	tr|G3V734|G3V734_RAT	95.53	8	8	1212000	2	1	3	N	36133	2,4-dienoyl CoA reductase 1, mitochondrial, isoform CRA_a OS=Rattus norvegicus OX=10116 GN=Decr1 PE=1 SV=1
51	11724	Q64591|DECR_RAT	95.53	8	8	1212000	2	1	3	N	36133	2,4-dienoyl-CoA reductase, mitochondrial OS=Rattus norvegicus OX=10116 GN=Decr1 PE=1 SV=2
64	11616	P10818|CX6A1_RAT	93.76	27	27	1546100	2	2	2	N	12301	Cytochrome c oxidase subunit 6A1, mitochondrial OS=Rattus norvegicus OX=10116 GN=Cox6a1 PE=1 SV=2
77	2167	Q5M9I5|QCR6_RAT	90.49	21	21	952880	1	1	2	N	10424	Cytochrome b-c1 complex subunit 6, mitochondrial OS=Rattus norvegicus OX=10116 GN=Uqcrh PE=3 SV=1
58	158	P12075|COX5B_RAT	88.52	29	29	6944000	3	3	3	N	13915	Cytochrome c oxidase subunit 5B, mitochondrial OS=Rattus norvegicus OX=10116 GN=Cox5b PE=1 SV=2
46	47	Q9WVK3|PECR_RAT	88.14	9	9	1768600	3	3	4	N	32433	Peroxisomal trans-2-enoyl-CoA reductase OS=Rattus norvegicus OX=10116 GN=Pecr PE=2 SV=1
46	48	tr|A0A0G2JVG4|A0A0G2JVG4_RAT	88.14	9	9	1768600	3	3	4	N	32737	Peroxisomal trans-2-enoyl-CoA reductase OS=Rattus norvegicus OX=10116 GN=Pecr PE=1 SV=1
125	13900	P19804|NDKB_RAT	84.02	9	9	933500	1	1	1	N	17283	Nucleoside diphosphate kinase B OS=Rattus norvegicus OX=10116 GN=Nme2 PE=1 SV=1
125	13901	Q05982|NDKA_RAT	84.02	9	9	933500	1	1	1	N	17193	Nucleoside diphosphate kinase A OS=Rattus norvegicus OX=10116 GN=Nme1 PE=1 SV=1
126	11610	tr|Q7H115|Q7H115_RAT	82.94	5	5	911840	1	1	1	N	29871	Cytochrome c oxidase subunit 3 OS=Rattus norvegicus OX=10116 GN=Mt-co3 PE=3 SV=1
126	11611	tr|I6V4L9|I6V4L9_RAT	82.94	5	5	911840	1	1	1	N	29844	Cytochrome c oxidase subunit 3 OS=Rattus norvegicus OX=10116 GN=COX3 PE=3 SV=1
126	11612	tr|Q8M7G4|Q8M7G4_RAT	82.94	5	5	911840	1	1	1	N	29861	Cytochrome c oxidase subunit 3 OS=Rattus norvegicus OX=10116 PE=2 SV=1
126	11613	tr|A0A096XKT2|A0A096XKT2_RAT	82.94	5	5	911840	1	1	1	N	29901	Cytochrome c oxidase subunit 3 OS=Rattus norvegicus OX=10116 GN=COX3 PE=3 SV=1
126	11614	P05505|COX3_RAT	82.94	5	5	911840	1	1	1	N	29871	Cytochrome c oxidase subunit 3 OS=Rattus norvegicus OX=10116 GN=Mtco3 PE=1 SV=5
126	11615	tr|Q8SEZ2|Q8SEZ2_RAT	82.94	5	5	911840	1	1	1	N	29870	Cytochrome c oxidase subunit 3 (Fragment) OS=Rattus norvegicus OX=10116 GN=COIII PE=3 SV=1
44	56	tr|S5RZM8|S5RZM8_RAT	76.74	11	11	4079900	3	3	4	Y	25958	Cytochrome c oxidase subunit 2 OS=Rattus norvegicus OX=10116 GN=COX2 PE=3 SV=1
44	57	P00406|COX2_RAT	76.74	11	11	4079900	3	3	4	Y	25928	Cytochrome c oxidase subunit 2 OS=Rattus norvegicus OX=10116 GN=Mtco2 PE=1 SV=3
44	59	tr|Q5UAJ6|Q5UAJ6_RAT	76.74	11	11	4079900	3	3	4	Y	25942	Cytochrome c oxidase subunit 2 OS=Rattus norvegicus OX=10116 GN=COX2 PE=3 SV=1
44	58	tr|Q37652|Q37652_RAT	76.74	11	11	4079900	3	3	4	Y	26007	Cytochrome c oxidase subunit 2 OS=Rattus norvegicus OX=10116 GN=COXII PE=3 SV=1
44	60	tr|Q8SEZ5|Q8SEZ5_RAT	76.74	11	11	4079900	3	3	4	Y	25928	Cytochrome c oxidase subunit 2 OS=Rattus norvegicus OX=10116 GN=Mt-co2 PE=1 SV=1
44	61	tr|A0A097PE04|A0A097PE04_RAT	76.74	11	11	4079900	3	3	4	Y	25894	Cytochrome c oxidase subunit 2 OS=Rattus norvegicus OX=10116 GN=COX2 PE=3 SV=1
67	6851	Q5PQT3|GLYAT_RAT	75.82	5	5	516050	1	1	2	N	33899	Glycine N-acyltransferase OS=Rattus norvegicus OX=10116 GN=Glyat PE=2 SV=1
67	6852	tr|A4PB92|A4PB92_RAT	75.82	5	5	516050	1	1	2	N	33899	Glycine N-acyltransferase OS=Rattus norvegicus OX=10116 GN=Glyat PE=2 SV=1
74	11618	P11951|CX6C2_RAT	75.46	21	21	1308400	2	2	2	N	8455	Cytochrome c oxidase subunit 6C-2 OS=Rattus norvegicus OX=10116 GN=Cox6c2 PE=1 SV=3
72	30	Q7TQ16|QCR8_RAT	75.25	23	23	1354300	2	2	2	N	9849	Cytochrome b-c1 complex subunit 8 OS=Rattus norvegicus OX=10116 GN=Uqcrq PE=3 SV=1
127	6797	P08011|MGST1_RAT	73.01	10	10	408280	1	1	1	N	17472	Microsomal glutathione S-transferase 1 OS=Rattus norvegicus OX=10116 GN=Mgst1 PE=1 SV=3
127	6798	tr|B6DYQ4|B6DYQ4_RAT	73.01	10	10	408280	1	1	1	N	17472	Microsomal glutathione S-transferase OS=Rattus norvegicus OX=10116 GN=Mgst1 PE=2 SV=1
128	13902	P70619|GSHR_RAT	73.01	5	5	302750	1	1	1	N	46301	Glutathione reductase (Fragment) OS=Rattus norvegicus OX=10116 GN=Gsr PE=2 SV=2
130	9340	D4A7N1|MIC25_RAT	72.62	5	5	295080	1	1	1	N	29211	MICOS complex subunit Mic25 OS=Rattus norvegicus OX=10116 GN=Chchd6 PE=1 SV=1
129	376	tr|D3ZXF9|D3ZXF9_RAT	69.73	9	9	290590	1	1	1	N	29441	Mitochondrial ribosomal protein L12 OS=Rattus norvegicus OX=10116 GN=Mrpl12 PE=1 SV=1
131	2210	Q8VID1|DHRS4_RAT	66.41	5	5	831730	1	1	1	N	29822	Dehydrogenase/reductase SDR family member 4 OS=Rattus norvegicus OX=10116 GN=Dhrs4 PE=2 SV=2
65	760	tr|F1M953|F1M953_RAT	66.21	4	4	160410	2	2	2	N	73745	Stress-70 protein, mitochondrial OS=Rattus norvegicus OX=10116 GN=Hspa9 PE=1 SV=1
65	761	P48721|GRP75_RAT	66.21	4	4	160410	2	2	2	N	73858	Stress-70 protein, mitochondrial OS=Rattus norvegicus OX=10116 GN=Hspa9 PE=1 SV=3
132	11617	P80432|COX7C_RAT	65.38	14	14	252730	1	1	1	N	7375	Cytochrome c oxidase subunit 7C, mitochondrial OS=Rattus norvegicus OX=10116 GN=Cox7c PE=1 SV=2
55	101	tr|B2RYT5|B2RYT5_RAT	64.98	24	24	2231100	3	3	3	N	12651	Cox7a2l protein OS=Rattus norvegicus OX=10116 GN=Cox7a2l PE=2 SV=1
75	205	tr|D3Z900|D3Z900_RAT	64.17	5	5	1193300	2	2	2	N	38239	Mitochondrial amidoxime reducing component 2 OS=Rattus norvegicus OX=10116 GN=Marc2 PE=1 SV=2
75	206	O88994|MARC2_RAT	64.17	5	5	1193300	2	2	2	N	38249	Mitochondrial amidoxime reducing component 2 OS=Rattus norvegicus OX=10116 GN=Marc2 PE=2 SV=1
75	207	tr|M0R6N2|M0R6N2_RAT	64.17	5	5	1193300	2	2	2	N	38175	MOSC domain-containing protein 2, mitochondrial-like OS=Rattus norvegicus OX=10116 GN=LOC100910481 PE=1 SV=1
133	4512	Q5RJR8|LRC59_RAT	58.38	3	3	131730	1	1	1	N	34869	Leucine-rich repeat-containing protein 59 OS=Rattus norvegicus OX=10116 GN=Lrrc59 PE=1 SV=1
101	7185	Q924S5|LONM_RAT	58.08	4	4	3606500	1	1	1	N	105792	Lon protease homolog, mitochondrial OS=Rattus norvegicus OX=10116 GN=Lonp1 PE=2 SV=1
134	13903	P35171|CX7A2_RAT	53.43	10	10	364200	1	1	1	N	9353	Cytochrome c oxidase subunit 7A2, mitochondrial OS=Rattus norvegicus OX=10116 GN=Cox7a2 PE=1 SV=1
134	13904	tr|B2RYS0|B2RYS0_RAT	53.43	10	10	364200	1	1	1	N	9353	Cox7a2 protein OS=Rattus norvegicus OX=10116 GN=Cox7a2 PE=2 SV=1
62	504	tr|A0A0G2K5L6|A0A0G2K5L6_RAT	53.22	1	1	10507000	2	1	2	Y	275755	Acetyl-CoA carboxylase beta OS=Rattus norvegicus OX=10116 GN=Acacb PE=1 SV=1
62	505	tr|A0A0G2K1F2|A0A0G2K1F2_RAT	53.22	1	1	10507000	2	1	2	Y	276393	Acetyl-CoA carboxylase beta OS=Rattus norvegicus OX=10116 GN=Acacb PE=1 SV=1
62	390	tr|O70151|O70151_RAT	53.22	1	1	10507000	2	1	2	Y	276097	Acetyl-CoA carboxylase OS=Rattus norvegicus OX=10116 GN=Acacb PE=2 SV=1
62	506	tr|D3ZBE2|D3ZBE2_RAT	53.22	1	1	10507000	2	1	2	Y	275967	Acetyl-CoA carboxylase beta OS=Rattus norvegicus OX=10116 GN=Acacb PE=1 SV=3
62	507	tr|E9PSQ0|E9PSQ0_RAT	53.22	1	1	10507000	2	1	2	Y	276255	Acetyl-CoA carboxylase beta OS=Rattus norvegicus OX=10116 GN=Acacb PE=1 SV=2
48	179	F1M775|DIAP1_RAT	49.15	2	2	1275600	3	1	4	Y	140418	Protein diaphanous homolog 1 OS=Rattus norvegicus OX=10116 GN=Diaph1 PE=1 SV=3
135	11619	P80431|COX7B_RAT	47.35	9	9	447640	1	1	1	N	8995	Cytochrome c oxidase subunit 7B, mitochondrial OS=Rattus norvegicus OX=10116 GN=Cox7b PE=1 SV=3
76	9291	tr|D3ZUX5|D3ZUX5_RAT	47.25	7	7	154490	2	2	2	N	26435	MICOS complex subunit OS=Rattus norvegicus OX=10116 GN=Chchd3 PE=1 SV=1
52	4633	P00481|OTC_RAT	40.49	10	10	1044200	1	1	3	N	39886	Ornithine carbamoyltransferase, mitochondrial OS=Rattus norvegicus OX=10116 GN=Otc PE=1 SV=1
136	11623	tr|B2RZD6|B2RZD6_RAT	39.08	10	10	543290	1	1	1	N	9327	NDUFA4, mitochondrial complex-associated OS=Rattus norvegicus OX=10116 GN=Ndufa4 PE=1 SV=1
139	13905	tr|C7EMI4|C7EMI4_RAT	37.25	4	4	741150	1	1	1	N	20146	Cytochrome b (Fragment) OS=Rattus norvegicus OX=10116 PE=4 SV=1
139	13906	tr|U3M4V1|U3M4V1_RAT	37.25	4	4	741150	1	1	1	N	20795	Cytochrome b (Fragment) OS=Rattus norvegicus OX=10116 GN=cyt b PE=4 SV=1
139	13907	tr|A4UHZ3|A4UHZ3_RAT	37.25	3	3	741150	1	1	1	N	25311	Cytochrome b (Fragment) OS=Rattus norvegicus OX=10116 GN=cytb PE=4 SV=1
139	13908	tr|A4UHZ2|A4UHZ2_RAT	37.25	3	3	741150	1	1	1	N	25312	Cytochrome b (Fragment) OS=Rattus norvegicus OX=10116 GN=cytb PE=4 SV=1
139	13909	tr|B3Y999|B3Y999_RAT	37.25	3	3	741150	1	1	1	N	28378	Cytochrome b (Fragment) OS=Rattus norvegicus OX=10116 GN=cytb PE=4 SV=1
139	13910	tr|M9TEK6|M9TEK6_RAT	37.25	2	2	741150	1	1	1	N	35982	Cytochrome b (Fragment) OS=Rattus norvegicus OX=10116 GN=cytb PE=3 SV=1
139	13911	tr|E0A0C7|E0A0C7_RAT	37.25	2	2	741150	1	1	1	N	41009	Cytochrome b (Fragment) OS=Rattus norvegicus OX=10116 GN=cytb PE=3 SV=1
139	13912	tr|E0A016|E0A016_RAT	37.25	2	2	741150	1	1	1	N	41634	Cytochrome b (Fragment) OS=Rattus norvegicus OX=10116 GN=cytb PE=3 SV=1
139	13913	tr|A0A411P2K0|A0A411P2K0_RAT	37.25	2	2	741150	1	1	1	N	42238	Cytochrome b (Fragment) OS=Rattus norvegicus OX=10116 GN=Cytb PE=3 SV=1
139	13914	tr|E0A075|E0A075_RAT	37.25	2	2	741150	1	1	1	N	42410	Cytochrome b (Fragment) OS=Rattus norvegicus OX=10116 GN=cytb PE=3 SV=1
139	13915	tr|L0L4L8|L0L4L8_RAT	37.25	2	2	741150	1	1	1	N	42470	Cytochrome b (Fragment) OS=Rattus norvegicus OX=10116 GN=cytb PE=3 SV=1
139	13916	tr|A0A140GE09|A0A140GE09_RAT	37.25	2	2	741150	1	1	1	N	42569	Cytochrome b (Fragment) OS=Rattus norvegicus OX=10116 PE=3 SV=1
139	13917	tr|A0A140GE10|A0A140GE10_RAT	37.25	2	2	741150	1	1	1	N	42574	Cytochrome b (Fragment) OS=Rattus norvegicus OX=10116 PE=3 SV=1
139	13918	tr|A0A140GE11|A0A140GE11_RAT	37.25	2	2	741150	1	1	1	N	42588	Cytochrome b (Fragment) OS=Rattus norvegicus OX=10116 PE=3 SV=1
139	13919	tr|A0A385HC91|A0A385HC91_RAT	37.25	2	2	741150	1	1	1	N	42780	Cytochrome b (Fragment) OS=Rattus norvegicus OX=10116 PE=3 SV=1
139	13920	tr|A0A385HCC9|A0A385HCC9_RAT	37.25	2	2	741150	1	1	1	N	42766	Cytochrome b (Fragment) OS=Rattus norvegicus OX=10116 PE=3 SV=1
139	13921	tr|A0A3Q8AGE8|A0A3Q8AGE8_RAT	37.25	2	2	741150	1	1	1	N	42712	Cytochrome b (Fragment) OS=Rattus norvegicus OX=10116 GN=Cytb PE=3 SV=1
139	13922	tr|A0A3Q8AC68|A0A3Q8AC68_RAT	37.25	2	2	741150	1	1	1	N	42622	Cytochrome b (Fragment) OS=Rattus norvegicus OX=10116 GN=Cytb PE=3 SV=1
139	13923	tr|A0A3S6FK13|A0A3S6FK13_RAT	37.25	2	2	741150	1	1	1	N	42702	Cytochrome b (Fragment) OS=Rattus norvegicus OX=10116 GN=Cytb PE=3 SV=1
139	13924	tr|A0A385HCK1|A0A385HCK1_RAT	37.25	2	2	741150	1	1	1	N	42824	Cytochrome b (Fragment) OS=Rattus norvegicus OX=10116 PE=3 SV=1
139	13925	tr|A0A3Q8AZT4|A0A3Q8AZT4_RAT	37.25	2	2	741150	1	1	1	N	42723	Cytochrome b (Fragment) OS=Rattus norvegicus OX=10116 GN=Cytb PE=3 SV=1
139	13926	tr|A0A3S6FK10|A0A3S6FK10_RAT	37.25	2	2	741150	1	1	1	N	42726	Cytochrome b (Fragment) OS=Rattus norvegicus OX=10116 GN=Cytb PE=3 SV=1
139	13927	tr|A0A385HC93|A0A385HC93_RAT	37.25	2	2	741150	1	1	1	N	42751	Cytochrome b (Fragment) OS=Rattus norvegicus OX=10116 PE=3 SV=1
139	13928	tr|A0A3S6FM15|A0A3S6FM15_RAT	37.25	2	2	741150	1	1	1	N	42698	Cytochrome b (Fragment) OS=Rattus norvegicus OX=10116 GN=Cytb PE=3 SV=1
139	13929	tr|A0A097PE40|A0A097PE40_RAT	37.25	2	2	741150	1	1	1	N	42865	Cytochrome b OS=Rattus norvegicus OX=10116 GN=CYTB PE=3 SV=1
139	13930	tr|A0A220D9Z6|A0A220D9Z6_RAT	37.25	2	2	741150	1	1	1	N	43018	Cytochrome b OS=Rattus norvegicus OX=10116 PE=3 SV=1
139	13931	tr|D6NSP2|D6NSP2_RAT	37.25	2	2	741150	1	1	1	N	42945	Cytochrome b (Fragment) OS=Rattus norvegicus OX=10116 GN=cytb PE=3 SV=1
139	13932	tr|D6NSS6|D6NSS6_RAT	37.25	2	2	741150	1	1	1	N	42993	Cytochrome b (Fragment) OS=Rattus norvegicus OX=10116 GN=cytb PE=3 SV=1
139	13933	tr|Q06Q99|Q06Q99_RAT	37.25	2	2	741150	1	1	1	N	42997	Cytochrome b OS=Rattus norvegicus OX=10116 GN=CYB PE=3 SV=1
139	13934	tr|L0N490|L0N490_RAT	37.25	2	2	741150	1	1	1	N	43056	Cytochrome b (Fragment) OS=Rattus norvegicus OX=10116 GN=cytb PE=3 SV=1
139	13935	tr|D6NSQ3|D6NSQ3_RAT	37.25	2	2	741150	1	1	1	N	43012	Cytochrome b (Fragment) OS=Rattus norvegicus OX=10116 GN=cytb PE=3 SV=1
139	13936	tr|D6NSR3|D6NSR3_RAT	37.25	2	2	741150	1	1	1	N	42986	Cytochrome b (Fragment) OS=Rattus norvegicus OX=10116 GN=cytb PE=3 SV=1
139	13937	tr|D6NSP4|D6NSP4_RAT	37.25	2	2	741150	1	1	1	N	43016	Cytochrome b (Fragment) OS=Rattus norvegicus OX=10116 GN=cytb PE=3 SV=1
139	13938	tr|D6NSQ8|D6NSQ8_RAT	37.25	2	2	741150	1	1	1	N	43016	Cytochrome b (Fragment) OS=Rattus norvegicus OX=10116 GN=cytb PE=3 SV=1
139	13939	tr|D6NSR8|D6NSR8_RAT	37.25	2	2	741150	1	1	1	N	42998	Cytochrome b (Fragment) OS=Rattus norvegicus OX=10116 GN=cytb PE=3 SV=1
139	13940	tr|F8QU37|F8QU37_RAT	37.25	2	2	741150	1	1	1	N	42992	Cytochrome b (Fragment) OS=Rattus norvegicus OX=10116 GN=cytb PE=3 SV=1
139	13941	tr|F2Q6S6|F2Q6S6_RAT	37.25	2	2	741150	1	1	1	N	42938	Cytochrome b (Fragment) OS=Rattus norvegicus OX=10116 GN=cytb PE=3 SV=1
139	13942	tr|A0A0A1FZ42|A0A0A1FZ42_RAT	37.25	2	2	741150	1	1	1	N	42989	Cytochrome b OS=Rattus norvegicus OX=10116 GN=CYTB PE=3 SV=1
139	13943	tr|D6NSS7|D6NSS7_RAT	37.25	2	2	741150	1	1	1	N	42948	Cytochrome b (Fragment) OS=Rattus norvegicus OX=10116 GN=cytb PE=3 SV=1
139	13944	tr|Q8SEY9|Q8SEY9_RAT	37.25	2	2	741150	1	1	1	N	43015	Cytochrome b OS=Rattus norvegicus OX=10116 GN=cytb PE=3 SV=1
139	13945	tr|D6NSR7|D6NSR7_RAT	37.25	2	2	741150	1	1	1	N	42982	Cytochrome b (Fragment) OS=Rattus norvegicus OX=10116 GN=cytb PE=3 SV=1
139	13946	tr|A0A220DA44|A0A220DA44_RAT	37.25	2	2	741150	1	1	1	N	42968	Cytochrome b OS=Rattus norvegicus OX=10116 PE=3 SV=1
139	13947	tr|D6NSP0|D6NSP0_RAT	37.25	2	2	741150	1	1	1	N	43023	Cytochrome b (Fragment) OS=Rattus norvegicus OX=10116 GN=cytb PE=3 SV=1
139	13948	tr|D6NSQ6|D6NSQ6_RAT	37.25	2	2	741150	1	1	1	N	42952	Cytochrome b (Fragment) OS=Rattus norvegicus OX=10116 GN=cytb PE=3 SV=1
139	13949	tr|L0N495|L0N495_RAT	37.25	2	2	741150	1	1	1	N	42992	Cytochrome b (Fragment) OS=Rattus norvegicus OX=10116 GN=cytb PE=3 SV=1
139	13950	tr|D6NSQ0|D6NSQ0_RAT	37.25	2	2	741150	1	1	1	N	42968	Cytochrome b (Fragment) OS=Rattus norvegicus OX=10116 GN=cytb PE=3 SV=1
139	13951	tr|Q5UAI7|Q5UAI7_RAT	37.25	2	2	741150	1	1	1	N	42998	Cytochrome b OS=Rattus norvegicus OX=10116 GN=CYTB PE=3 SV=1
139	13952	tr|D6NSR2|D6NSR2_RAT	37.25	2	2	741150	1	1	1	N	43073	Cytochrome b (Fragment) OS=Rattus norvegicus OX=10116 GN=cytb PE=3 SV=1
139	13953	tr|A0A0S1Z1V9|A0A0S1Z1V9_RAT	37.25	2	2	741150	1	1	1	N	43002	Cytochrome b OS=Rattus norvegicus OX=10116 GN=CYTB PE=3 SV=1
139	13954	tr|B0M1Q8|B0M1Q8_RAT	37.25	2	2	741150	1	1	1	N	43026	Cytochrome b (Fragment) OS=Rattus norvegicus OX=10116 GN=cytb PE=3 SV=1
139	13955	tr|D6NSR9|D6NSR9_RAT	37.25	2	2	741150	1	1	1	N	42970	Cytochrome b (Fragment) OS=Rattus norvegicus OX=10116 GN=cytb PE=3 SV=1
139	13956	tr|D6NSR1|D6NSR1_RAT	37.25	2	2	741150	1	1	1	N	43002	Cytochrome b (Fragment) OS=Rattus norvegicus OX=10116 GN=cytb PE=3 SV=1
139	13957	tr|Q8HIC4|Q8HIC4_RAT	37.25	2	2	741150	1	1	1	N	43012	Cytochrome b OS=Rattus norvegicus OX=10116 GN=Mt-cyb PE=3 SV=1
139	13958	tr|A0A220DA02|A0A220DA02_RAT	37.25	2	2	741150	1	1	1	N	42968	Cytochrome b OS=Rattus norvegicus OX=10116 PE=3 SV=1
139	13959	tr|S5RKC8|S5RKC8_RAT	37.25	2	2	741150	1	1	1	N	42997	Cytochrome b OS=Rattus norvegicus OX=10116 GN=CYTB PE=3 SV=1
139	13960	tr|A0A0S1Z1V4|A0A0S1Z1V4_RAT	37.25	2	2	741150	1	1	1	N	43016	Cytochrome b OS=Rattus norvegicus OX=10116 GN=CYTB PE=3 SV=1
139	13961	tr|R9TKN1|R9TKN1_RAT	37.25	2	2	741150	1	1	1	N	43012	Cytochrome b OS=Rattus norvegicus OX=10116 GN=CYTB PE=3 SV=1
139	13962	P00159|CYB_RAT	37.25	2	2	741150	1	1	1	N	43012	Cytochrome b OS=Rattus norvegicus OX=10116 GN=Mt-Cyb PE=3 SV=3
139	13963	tr|D6NSP8|D6NSP8_RAT	37.25	2	2	741150	1	1	1	N	43100	Cytochrome b (Fragment) OS=Rattus norvegicus OX=10116 GN=cytb PE=3 SV=1
139	13964	tr|L0N311|L0N311_RAT	37.25	2	2	741150	1	1	1	N	43045	Cytochrome b (Fragment) OS=Rattus norvegicus OX=10116 GN=cytb PE=3 SV=1
139	13965	tr|A0A220DA20|A0A220DA20_RAT	37.25	2	2	741150	1	1	1	N	43010	Cytochrome b OS=Rattus norvegicus OX=10116 PE=3 SV=1
139	13966	tr|A0A220D9W5|A0A220D9W5_RAT	37.25	2	2	741150	1	1	1	N	43028	Cytochrome b OS=Rattus norvegicus OX=10116 GN=cyt-b PE=3 SV=1
139	13967	tr|A0A220DA28|A0A220DA28_RAT	37.25	2	2	741150	1	1	1	N	42970	Cytochrome b OS=Rattus norvegicus OX=10116 PE=3 SV=1
139	13968	tr|H6RXT5|H6RXT5_RAT	37.25	2	2	741150	1	1	1	N	43044	Cytochrome b OS=Rattus norvegicus OX=10116 GN=cytb PE=3 SV=1
139	13969	tr|H2KXA0|H2KXA0_RAT	37.25	2	2	741150	1	1	1	N	42978	Cytochrome b (Fragment) OS=Rattus norvegicus OX=10116 GN=cytb PE=3 SV=1
139	13970	tr|L0N1V8|L0N1V8_RAT	37.25	2	2	741150	1	1	1	N	43058	Cytochrome b (Fragment) OS=Rattus norvegicus OX=10116 GN=cytb PE=3 SV=1
139	13971	tr|A0A096XNM4|A0A096XNM4_RAT	37.25	2	2	741150	1	1	1	N	43042	Cytochrome b (Fragment) OS=Rattus norvegicus OX=10116 PE=3 SV=1
139	13972	tr|D6NSP7|D6NSP7_RAT	37.25	2	2	741150	1	1	1	N	43046	Cytochrome b (Fragment) OS=Rattus norvegicus OX=10116 GN=cytb PE=3 SV=1
139	13973	tr|A0A220D9Z3|A0A220D9Z3_RAT	37.25	2	2	741150	1	1	1	N	43024	Cytochrome b OS=Rattus norvegicus OX=10116 PE=3 SV=1
139	13974	tr|D6NSP5|D6NSP5_RAT	37.25	2	2	741150	1	1	1	N	43012	Cytochrome b (Fragment) OS=Rattus norvegicus OX=10116 GN=cytb PE=3 SV=1
139	13975	tr|D6NSP6|D6NSP6_RAT	37.25	2	2	741150	1	1	1	N	43050	Cytochrome b (Fragment) OS=Rattus norvegicus OX=10116 GN=cytb PE=3 SV=1
139	13976	tr|Q9G898|Q9G898_RAT	37.25	2	2	741150	1	1	1	N	42830	Cytochrome b OS=Rattus norvegicus OX=10116 PE=2 SV=1
137	622	P18163|ACSL1_RAT	34.62	2	2	1753800	1	1	1	N	78179	Long-chain-fatty-acid--CoA ligase 1 OS=Rattus norvegicus OX=10116 GN=Acsl1 PE=1 SV=1
78	181	P61980|HNRPK_RAT	33.22	3	3	1064400	2	1	2	N	50976	Heterogeneous nuclear ribonucleoprotein K OS=Rattus norvegicus OX=10116 GN=Hnrnpk PE=1 SV=1
79	2538	D3ZG52|DNA2_RAT	31.94	1	1		2	0	2	N	119588	DNA replication ATP-dependent helicase/nuclease DNA2 OS=Rattus norvegicus OX=10116 GN=Dna2 PE=3 SV=1
79	2550	tr|A0A0H2UH92|A0A0H2UH92_RAT	31.94	1	1		2	0	2	N	136526	Graves disease carrier protein OS=Rattus norvegicus OX=10116 GN=Slc25a16 PE=1 SV=1
103	6940	P06761|BIP_RAT	30.93	1	1	0	1	1	1	N	72347	Endoplasmic reticulum chaperone BiP OS=Rattus norvegicus OX=10116 GN=Hspa5 PE=1 SV=1
140	4278	tr|A0A0U1RRQ6|A0A0U1RRQ6_RAT	29.99	3	3	1315400	1	1	1	Y	35344	Solute carrier family 25, member 44 OS=Rattus norvegicus OX=10116 GN=Slc25a44 PE=1 SV=1
140	4279	tr|D3ZSN7|D3ZSN7_RAT	29.99	2	2	1315400	1	1	1	Y	37879	Similar to CG5805-PA (Predicted), isoform CRA_a OS=Rattus norvegicus OX=10116 GN=Slc25a44 PE=1 SV=1
153	140	tr|F1LPI6|F1LPI6_RAT	26.62	0	0	555250	1	1	1	N	200075	Peripheral-type benzodiazepine receptor-associated protein 1 OS=Rattus norvegicus OX=10116 GN=Tspoap1 PE=4 SV=1
153	141	Q9JIR0|RIMB1_RAT	26.62	0	0	555250	1	1	1	N	200202	Peripheral-type benzodiazepine receptor-associated protein 1 OS=Rattus norvegicus OX=10116 GN=Tspoap1 PE=1 SV=2
69	2194	tr|Q5U2T0|Q5U2T0_RAT	23.77	2	2	0	1	1	2	N	44494	Death associated protein 3 OS=Rattus norvegicus OX=10116 GN=Dap3 PE=2 SV=1
69	2195	tr|F7EZZ0|F7EZZ0_RAT	23.77	2	2	0	1	1	2	N	45112	Death-associated protein 3 OS=Rattus norvegicus OX=10116 GN=Dap3 PE=1 SV=1
69	256	tr|A0A0G2K264|A0A0G2K264_RAT	23.77	2	2	0	1	1	2	N	46666	Death-associated protein 3 OS=Rattus norvegicus OX=10116 GN=Dap3 PE=1 SV=1
81	4406	tr|A0A0G2JYD4|A0A0G2JYD4_RAT	23.58	0	0	2622700	1	1	1	N	487857	Vacuolar protein sorting 13 homolog D OS=Rattus norvegicus OX=10116 GN=Vps13d PE=1 SV=1
81	4407	tr|D3ZKC6|D3ZKC6_RAT	23.58	0	0	2622700	1	1	1	N	488962	Vacuolar protein sorting 13 homolog D OS=Rattus norvegicus OX=10116 GN=Vps13d PE=1 SV=1
105	9327	O54902|NRAM2_RAT	22.9	2	2	1733600	1	1	1	N	62277	Natural resistance-associated macrophage protein 2 OS=Rattus norvegicus OX=10116 GN=Slc11a2 PE=1 SV=1
148	6827	Q9Z0U4|GABR1_RAT	22.26	1	1	451400	1	1	1	N	111534	Gamma-aminobutyric acid type B receptor subunit 1 OS=Rattus norvegicus OX=10116 GN=Gabbr1 PE=1 SV=1
93	4527	Q5XHZ0|TRAP1_RAT	43973	4	4	430990	1	1	1	N	80461	Heat shock protein 75 kDa, mitochondrial OS=Rattus norvegicus OX=10116 GN=Trap1 PE=1 SV=1
96	4666	tr|D3ZDM5|D3ZDM5_RAT	21.54	1	1		1	0	1	N	99970	NACHT, leucine rich repeat and PYD containing 5 (Predicted) OS=Rattus norvegicus OX=10116 GN=Nlrp5 PE=4 SV=1
150	6949	Q66HA8|HS105_RAT	20.97	1	1	467670	1	1	1	Y	96419	Heat shock protein 105 kDa OS=Rattus norvegicus OX=10116 GN=Hsph1 PE=1 SV=1
109	14004	P07308|ACOD1_RAT	20.9	1	1	299660	1	1	1	N	41467	Acyl-CoA desaturase 1 OS=Rattus norvegicus OX=10116 GN=Scd1 PE=1 SV=2
109	96	P08461|ODP2_RAT	20.9	1	1	299660	1	1	1	N	67166	Dihydrolipoyllysine-residue acetyltransferase component of pyruvate dehydrogenase complex, mitochondrial OS=Rattus norvegicus OX=10116 GN=Dlat PE=1 SV=3
109	7046	O35303|DNM1L_RAT	20.9	1	1	299660	1	1	1	N	83908	Dynamin-1-like protein OS=Rattus norvegicus OX=10116 GN=Dnm1l PE=1 SV=1
152	2204	Q63484|AKT3_RAT	20.54	2	2	264270	1	1	1	Y	55797	RAC-gamma serine/threonine-protein kinase OS=Rattus norvegicus OX=10116 GN=Akt3 PE=2 SV=2
total 222 proteins
