# Supplementary material for: Mitochondrial F-ATP Synthase Co-Migrating Proteins and Ca2+-Dependent Formation of Large Channels
Source: Cells. 2023 Oct 7;12(19):2414. doi: 10.3390/cells12192414 (PMC10572550; doi:10.3390/cells12192414)
Supplement: Supplementary file 1 [file cells-12-02414-s001.zip › Dataset S4.xlsx]

## Sheet: Dimer
Protein Group	Protein ID	Accession	-10lgP	Coverage (%)	Coverage (%) Sample 2	Area Sample 2	#Peptides	#Unique	#Spec Sample 2	PTM	Avg. Mass	Description
2	13	P15999|ATPA_RAT	460.42	70	70	1415100000	75	75	245	Y	59754	ATP synthase subunit alpha, mitochondrial OS=Rattus norvegicus OX=10116 GN=Atp5f1a PE=1 SV=2
1	8	P10719|ATPB_RAT	449.64	81	81	1687800000	64	64	308	Y	56354	ATP synthase subunit beta, mitochondrial OS=Rattus norvegicus OX=10116 GN=Atp5f1b PE=1 SV=2
1	9	tr|G3V6D3|G3V6D3_RAT	449.64	81	81	1687800000	64	64	308	Y	56345	ATP synthase subunit beta OS=Rattus norvegicus OX=10116 GN=Atp5f1b PE=1 SV=1
6	3	P07756|CPSM_RAT	355.54	32	32	106500000	37	37	47	Y	164579	Carbamoyl-phosphate synthase [ammonia], mitochondrial OS=Rattus norvegicus OX=10116 GN=Cps1 PE=1 SV=1
8	10	P22791|HMCS2_RAT	330.14	44	44	87135000	27	27	32	Y	56912	Hydroxymethylglutaryl-CoA synthase, mitochondrial OS=Rattus norvegicus OX=10116 GN=Hmgcs2 PE=1 SV=1
8	11	tr|Q68G44|Q68G44_RAT	330.14	44	44	87135000	27	27	32	Y	56886	3-hydroxy-3-methylglutaryl coenzyme A synthase OS=Rattus norvegicus OX=10116 GN=Hmgcs2 PE=1 SV=1
16	2	P10860|DHE3_RAT	319.64	36	36	61338000	19	19	24	Y	61416	Glutamate dehydrogenase 1, mitochondrial OS=Rattus norvegicus OX=10116 GN=Glud1 PE=1 SV=2
10	5	Q64428|ECHA_RAT	315.18	36	36	36389000	26	25	30	Y	82665	Trifunctional enzyme subunit alpha, mitochondrial OS=Rattus norvegicus OX=10116 GN=Hadha PE=1 SV=2
5	16	P67779|PHB_RAT	293.28	85	85	298710000	30	29	57	Y	29820	Prohibitin OS=Rattus norvegicus OX=10116 GN=Phb PE=1 SV=1
7	97	P35435|ATPG_RAT	283.88	65	65	16360000	19	1	37	Y	30191	ATP synthase subunit gamma, mitochondrial OS=Rattus norvegicus OX=10116 GN=Atp5f1c PE=1 SV=2
11	95	tr|Q6QI09|Q6QI09_RAT	277.73	30	30	14501000	20	2	29	Y	67721	ATP synthase subunit gamma, mitochondrial OS=Rattus norvegicus OX=10116 GN=Taf3 PE=1 SV=1
3	18	Q5XIH7|PHB2_RAT	275.42	75	75	4403900	30	1	62	Y	33312	Prohibitin-2 OS=Rattus norvegicus OX=10116 GN=Phb2 PE=1 SV=1
9	114	P19511|AT5F1_RAT	275.26	55	55	250850000	19	19	31	Y	28869	ATP synthase F(0) complex subunit B1, mitochondrial OS=Rattus norvegicus OX=10116 GN=Atp5pb PE=1 SV=1
4	19	tr|A0A0G2KB63|A0A0G2KB63_RAT	274.47	76	76	2528600	30	1	61	Y	33168	Prohibitin OS=Rattus norvegicus OX=10116 GN=Phb2 PE=1 SV=1
13	204	P31399|ATP5H_RAT	266.61	80	80	116440000	16	16	26	Y	18763	ATP synthase subunit d, mitochondrial OS=Rattus norvegicus OX=10116 GN=Atp5pd PE=1 SV=3
17	168	tr|G3V7Y3|G3V7Y3_RAT	258.55	61	61	76560000	11	11	15	Y	17563	ATP synthase subunit delta, mitochondrial OS=Rattus norvegicus OX=10116 GN=Atp5f1d PE=1 SV=1
14	6	P52873|PYC_RAT	258	20	20	34013000	20	20	25	Y	129777	Pyruvate carboxylase, mitochondrial OS=Rattus norvegicus OX=10116 GN=Pc PE=1 SV=2
14	7	tr|A0A0G2JTL5|A0A0G2JTL5_RAT	258	19	19	34013000	20	20	25	Y	140005	Pyruvate carboxylase, mitochondrial OS=Rattus norvegicus OX=10116 GN=Pc PE=1 SV=1
12	188	Q06647|ATPO_RAT	245.52	65	65	217880000	22	22	28	Y	23398	ATP synthase subunit O, mitochondrial OS=Rattus norvegicus OX=10116 GN=Atp5po PE=1 SV=1
19	12	Q66HF1|NDUS1_RAT	242.11	22	22	32472000	13	13	14	N	79412	NADH-ubiquinone oxidoreductase 75 kDa subunit, mitochondrial OS=Rattus norvegicus OX=10116 GN=Ndufs1 PE=1 SV=1
15	4	P00507|AATM_RAT	238.5	39	39	83207000	18	18	25	Y	47314	Aspartate aminotransferase, mitochondrial OS=Rattus norvegicus OX=10116 GN=Got2 PE=1 SV=2
20	28	P18163|ACSL1_RAT	213.5	15	15	10176000	11	8	12	N	78179	Long-chain-fatty-acid--CoA ligase 1 OS=Rattus norvegicus OX=10116 GN=Acsl1 PE=1 SV=1
23	48	Q9WVK3|PECR_RAT	204.95	37	37	11917000	8	8	10	Y	32433	Peroxisomal trans-2-enoyl-CoA reductase OS=Rattus norvegicus OX=10116 GN=Pecr PE=2 SV=1
23	49	tr|A0A0G2JVG4|A0A0G2JVG4_RAT	204.95	36	36	11917000	8	8	10	Y	32737	Peroxisomal trans-2-enoyl-CoA reductase OS=Rattus norvegicus OX=10116 GN=Pecr PE=1 SV=1
34	54	tr|D4A0T0|D4A0T0_RAT	200.87	28	28	6537200	5	5	5	Y	20859	NADH:ubiquinone oxidoreductase subunit B10 OS=Rattus norvegicus OX=10116 GN=Ndufb10 PE=1 SV=1
22	14	Q5BK63|NDUA9_RAT	196.06	27	27	8445600	9	9	10	Y	42559	NADH dehydrogenase [ubiquinone] 1 alpha subcomplex subunit 9, mitochondrial OS=Rattus norvegicus OX=10116 GN=Ndufa9 PE=1 SV=2
24	32	P13086|SUCA_RAT	193.77	17	17	8044300	5	5	8	Y	36148	Succinate--CoA ligase [ADP/GDP-forming] subunit alpha, mitochondrial OS=Rattus norvegicus OX=10116 GN=Suclg1 PE=2 SV=2
24	33	tr|A0A0H2UHE1|A0A0H2UHE1_RAT	193.77	16	16	8044300	5	5	8	Y	37560	Succinate--CoA ligase [ADP/GDP-forming] subunit alpha, mitochondrial OS=Rattus norvegicus OX=10116 GN=Suclg1 PE=1 SV=1
40	36	tr|D3ZG43|D3ZG43_RAT	185.13	21	21	14115000	4	4	4	N	30226	NADH dehydrogenase (Ubiquinone) Fe-S protein 3 (Predicted), isoform CRA_c OS=Rattus norvegicus OX=10116 GN=Ndufs3 PE=1 SV=1
21	31	Q60587|ECHB_RAT	176.17	22	22	13498000	9	9	11	Y	51414	Trifunctional enzyme subunit beta, mitochondrial OS=Rattus norvegicus OX=10116 GN=Hadhb PE=1 SV=1
37	47	P0C2X9|AL4A1_RAT	171.46	9	9	3731900	4	4	4	N	61869	Delta-1-pyrroline-5-carboxylate dehydrogenase, mitochondrial OS=Rattus norvegicus OX=10116 GN=Aldh4a1 PE=1 SV=1
27	55	P24329|THTR_RAT	169.31	23	23	7435600	5	5	6	N	33407	Thiosulfate sulfurtransferase OS=Rattus norvegicus OX=10116 GN=Tst PE=1 SV=3
44	93	tr|D4A565|D4A565_RAT	167.21	28	28	4243200	4	4	4	N	21664	NADH dehydrogenase (Ubiquinone) 1 beta subcomplex, 5 (Predicted), isoform CRA_b OS=Rattus norvegicus OX=10116 GN=Ndufb5 PE=1 SV=1
41	46	P17764|THIL_RAT	162.52	12	12	2189300	4	4	4	N	44695	Acetyl-CoA acetyltransferase, mitochondrial OS=Rattus norvegicus OX=10116 GN=Acat1 PE=1 SV=1
32	39	P29147|BDH_RAT	155.31	15	15	6003700	5	5	5	N	38202	D-beta-hydroxybutyrate dehydrogenase, mitochondrial OS=Rattus norvegicus OX=10116 GN=Bdh1 PE=1 SV=2
32	40	tr|A0A0G2JSH2|A0A0G2JSH2_RAT	155.31	15	15	6003700	5	5	5	N	38333	3-hydroxybutyrate dehydrogenase, type 1, isoform CRA_a OS=Rattus norvegicus OX=10116 GN=Bdh1 PE=1 SV=1
55	64	Q02253|MMSA_RAT	153.04	10	10	3458800	3	3	3	N	57808	Methylmalonate-semialdehyde dehydrogenase [acylating], mitochondrial OS=Rattus norvegicus OX=10116 GN=Aldh6a1 PE=1 SV=1
55	65	tr|G3V7J0|G3V7J0_RAT	153.04	10	10	3458800	3	3	3	N	57748	Aldehyde dehydrogenase family 6, subfamily A1, isoform CRA_b OS=Rattus norvegicus OX=10116 GN=Aldh6a1 PE=1 SV=1
26	21	tr|Q5XIH3|Q5XIH3_RAT	151.14	18	18	4726100	7	7	7	N	50731	NADH dehydrogenase [ubiquinone] flavoprotein 1, mitochondrial OS=Rattus norvegicus OX=10116 GN=Ndufv1 PE=1 SV=1
30	27	P85834|EFTU_RAT	145	13	13	4037800	5	5	5	N	49522	Elongation factor Tu, mitochondrial OS=Rattus norvegicus OX=10116 GN=Tufm PE=1 SV=1
29	61	P63039|CH60_RAT	139.8	7	7	18976000	4	4	5	N	60956	60 kDa heat shock protein, mitochondrial OS=Rattus norvegicus OX=10116 GN=Hspd1 PE=1 SV=1
29	62	tr|A0A482IDN3|A0A482IDN3_RAT	139.8	7	7	18976000	4	4	5	N	60956	Hsp60 OS=Rattus norvegicus OX=10116 GN=Hspd1 PE=2 SV=1
90	4499	Q9JJW3|ATPMD_RAT	139.63	28	28	10314000	2	2	2	N	6408	ATP synthase membrane subunit DAPIT, mitochondrial OS=Rattus norvegicus OX=10116 GN=Atp5md PE=1 SV=1
35	4490	Q6PDU7|ATP5L_RAT	133.19	34	34	11005000	2	2	5	Y	11433	ATP synthase subunit g, mitochondrial OS=Rattus norvegicus OX=10116 GN=Atp5mg PE=1 SV=2
58	35	tr|Q6P6W6|Q6P6W6_RAT	128.01	20	20	1170700	3	3	3	N	31701	NADH dehydrogenase [ubiquinone] 1 alpha subcomplex subunit 10, mitochondrial OS=Rattus norvegicus OX=10116 GN=Ndufa10 PE=2 SV=1
58	23	Q561S0|NDUAA_RAT	128.01	15	15	1170700	3	3	3	N	40493	NADH dehydrogenase [ubiquinone] 1 alpha subcomplex subunit 10, mitochondrial OS=Rattus norvegicus OX=10116 GN=Ndufa10 PE=1 SV=1
58	26	tr|A0A1W2Q6F8|A0A1W2Q6F8_RAT	128.01	15	15	1170700	3	3	3	N	40544	NADH dehydrogenase [ubiquinone] 1 alpha subcomplex subunit 10, mitochondrial OS=Rattus norvegicus OX=10116 GN=Ndufa10l1 PE=3 SV=1
33	58	P19234|NDUV2_RAT	126.7	24	24	14809000	4	4	5	N	27378	NADH dehydrogenase [ubiquinone] flavoprotein 2, mitochondrial OS=Rattus norvegicus OX=10116 GN=Ndufv2 PE=1 SV=2
42	50	P10888|COX41_RAT	126.18	24	24	4134200	4	4	4	N	19515	Cytochrome c oxidase subunit 4 isoform 1, mitochondrial OS=Rattus norvegicus OX=10116 GN=Cox4i1 PE=1 SV=1
61	4494	D3Z9R8|ATP68_RAT	123.36	32	32	4396500	3	3	3	Y	6914	ATP synthase subunit ATP5MPL, mitochondrial OS=Rattus norvegicus OX=10116 GN=Atp5mpl PE=1 SV=1
49	44	P16970|ABCD3_RAT	122.68	5	5	1969000	2	2	3	N	75316	ATP-binding cassette sub-family D member 3 OS=Rattus norvegicus OX=10116 GN=Abcd3 PE=1 SV=3
48	76	O70351|HCD2_RAT	121.91	16	16	2753200	3	3	3	N	27246	3-hydroxyacyl-CoA dehydrogenase type-2 OS=Rattus norvegicus OX=10116 GN=Hsd17b10 PE=1 SV=3
48	77	tr|B0BMW2|B0BMW2_RAT	121.91	16	16	2753200	3	3	3	N	27250	3-hydroxyacyl-CoA dehydrogenase type-2 OS=Rattus norvegicus OX=10116 GN=Hsd17b10 PE=1 SV=1
56	105	tr|D3ZF13|D3ZF13_RAT	118.09	15	15	3263000	3	3	3	N	17514	Acyl carrier protein OS=Rattus norvegicus OX=10116 GN=Ndufab1 PE=1 SV=1
71	24	Q641Y2|NDUS2_RAT	108.84	5	5	4160900	2	2	2	N	52562	NADH dehydrogenase [ubiquinone] iron-sulfur protein 2, mitochondrial OS=Rattus norvegicus OX=10116 GN=Ndufs2 PE=1 SV=1
85	73	tr|B2RYS8|B2RYS8_RAT	106.22	15	15	1986100	2	2	2	N	21959	NADH dehydrogenase [ubiquinone] 1 beta subcomplex subunit 8, mitochondrial OS=Rattus norvegicus OX=10116 GN=Ndufb8 PE=1 SV=1
45	4487	tr|Q5UAJ5|Q5UAJ5_RAT	105.48	46	46	26910000	3	3	4	N	7642	ATP synthase protein 8 OS=Rattus norvegicus OX=10116 GN=ATP8 PE=3 SV=1
83	1	P32551|QCR2_RAT	104.52	6	6	0	2	2	2	N	48396	Cytochrome b-c1 complex subunit 2, mitochondrial OS=Rattus norvegicus OX=10116 GN=Uqcrc2 PE=1 SV=2
43	4486	P29419|ATP5I_RAT	101.05	52	52	15392000	4	4	4	N	8255	ATP synthase subunit e, mitochondrial OS=Rattus norvegicus OX=10116 GN=Atp5me PE=1 SV=3
63	4496	P21571|ATP5J_RAT	98.83	28	28	830950	2	2	3	N	12494	ATP synthase-coupling factor 6, mitochondrial OS=Rattus norvegicus OX=10116 GN=Atp5pf PE=1 SV=1
106	248	tr|G3V6I4|G3V6I4_RAT	98.24	9	9	1562300	1	1	1	N	37791	Mitochondrial amidoxime reducing component 1 OS=Rattus norvegicus OX=10116 GN=Marc1 PE=1 SV=1
196	170	Q63362|NDUA5_RAT	97.71	22	22	0	1	1	1	N	13412	NADH dehydrogenase [ubiquinone] 1 alpha subcomplex subunit 5 OS=Rattus norvegicus OX=10116 GN=Ndufa5 PE=1 SV=3
64	112	tr|Q5PQZ9|Q5PQZ9_RAT	97.41	21	21	638550	3	3	3	N	14359	NADH dehydrogenase [ubiquinone] 1 subunit C2 OS=Rattus norvegicus OX=10116 GN=Ndufc2 PE=1 SV=1
25	4488	D3ZAF6|ATPK_RAT	95.42	40	40	25060000	7	7	8	Y	10452	ATP synthase subunit f, mitochondrial OS=Rattus norvegicus OX=10116 GN=Atp5mf PE=1 SV=1
38	102	tr|F1LPB3|F1LPB3_RAT	94.17	4	4	288720	3	1	4	N	76559	Long-chain-fatty-acid--CoA ligase 5 OS=Rattus norvegicus OX=10116 GN=Acsl5 PE=1 SV=3
38	101	O88813|ACSL5_RAT	94.17	4	4	288720	3	1	4	N	76405	Long-chain-fatty-acid--CoA ligase 5 OS=Rattus norvegicus OX=10116 GN=Acsl5 PE=1 SV=1
39	53	B3DMA2|ACD11_RAT	89.68	4	4	3247200	4	4	4	N	87371	Acyl-CoA dehydrogenase family member 11 OS=Rattus norvegicus OX=10116 GN=Acad11 PE=1 SV=1
77	51	tr|Q5EBA4|Q5EBA4_RAT	88.7	8	8	2658700	2	2	2	N	33215	Nipsnap1 protein (Fragment) OS=Rattus norvegicus OX=10116 GN=Nipsnap1 PE=2 SV=1
77	52	tr|G3V728|G3V728_RAT	88.7	8	8	2658700	2	2	2	N	33346	4-nitrophenylphosphatase domain and non-neuronal SNAP25-like protein homolog 1 (C. elegans), isoform CRA_b OS=Rattus norvegicus OX=10116 GN=Nipsnap1 PE=1 SV=1
84	71	tr|F1LPG5|F1LPG5_RAT	82.67	29	29	1846400	2	2	2	N	15064	NADH:ubiquinone oxidoreductase subunit B4 OS=Rattus norvegicus OX=10116 GN=Ndufb4 PE=1 SV=1
36	29	tr|A0A140TAG5|A0A140TAG5_RAT	81.55	6	6	5965000	3	3	4	N	67049	MICOS complex subunit MIC60 OS=Rattus norvegicus OX=10116 GN=Immt PE=1 SV=1
36	22	tr|A0A0G2JVH4|A0A0G2JVH4_RAT	81.55	5	5	5965000	3	3	4	N	86230	MICOS complex subunit MIC60 OS=Rattus norvegicus OX=10116 GN=Immt PE=1 SV=1
36	30	Q3KR86|MIC60_RAT	81.55	6	6	5965000	3	3	4	N	67177	MICOS complex subunit Mic60 (Fragment) OS=Rattus norvegicus OX=10116 GN=Immt PE=1 SV=1
88	106	tr|D3ZXF9|D3ZXF9_RAT	80.57	9	9	952090	2	2	2	Y	29441	Mitochondrial ribosomal protein L12 OS=Rattus norvegicus OX=10116 GN=Mrpl12 PE=1 SV=1
59	4489	P29418|ATP5E_RAT	79.32	41	41	5361400	3	3	3	N	5767	ATP synthase subunit epsilon, mitochondrial OS=Rattus norvegicus OX=10116 GN=Atp5f1e PE=1 SV=2
62	67	tr|Q5RJN0|Q5RJN0_RAT	78.15	11	11	2352400	2	2	3	N	23945	NADH dehydrogenase (Ubiquinone) Fe-S protein 7 OS=Rattus norvegicus OX=10116 GN=Ndufs7 PE=1 SV=1
60	103	P04762|CATA_RAT	75.08	8	8	1307100	3	3	3	N	59757	Catalase OS=Rattus norvegicus OX=10116 GN=Cat PE=1 SV=3
51	63	Q09073|ADT2_RAT	69.12	10	10	2645600	3	3	3	N	32901	ADP/ATP translocase 2 OS=Rattus norvegicus OX=10116 GN=Slc25a5 PE=1 SV=3
153	66	Q8VID1|DHRS4_RAT	67.48	5	5	319920	1	1	1	N	29822	Dehydrogenase/reductase SDR family member 4 OS=Rattus norvegicus OX=10116 GN=Dhrs4 PE=2 SV=2
197	158	P11240|COX5A_RAT	62.99	17	17	0	1	1	1	N	16130	Cytochrome c oxidase subunit 5A, mitochondrial OS=Rattus norvegicus OX=10116 GN=Cox5a PE=1 SV=1
152	104	tr|A9UMV9|A9UMV9_RAT	61.39	11	11	407550	1	1	1	N	12500	NADH:ubiquinone oxidoreductase subunit A7 OS=Rattus norvegicus OX=10116 GN=Ndufa7 PE=1 SV=1
151	110	tr|D3ZCZ9|D3ZCZ9_RAT	58.66	9	9	865090	1	1	1	N	13040	NADH dehydrogenase [ubiquinone] iron-sulfur protein 6, mitochondrial OS=Rattus norvegicus OX=10116 GN=LOC100912599 PE=1 SV=1
151	178	P52504|NDUS6_RAT	58.66	9	9	865090	1	1	1	N	12783	NADH dehydrogenase [ubiquinone] iron-sulfur protein 6, mitochondrial OS=Rattus norvegicus OX=10116 GN=Ndufs6 PE=3 SV=1
91	100	tr|D3ZE15|D3ZE15_RAT	54.88	7	7	1861700	2	2	2	N	16777	NADH:ubiquinone oxidoreductase subunit A13 OS=Rattus norvegicus OX=10116 GN=Ndufa13 PE=1 SV=1
124	111	Q5RJR8|LRC59_RAT	54.45	4	4	723070	1	1	1	N	34869	Leucine-rich repeat-containing protein 59 OS=Rattus norvegicus OX=10116 GN=Lrrc59 PE=1 SV=1
150	160	Q8VHF5|CISY_RAT	50.03	2	2	0	1	1	1	N	51867	Citrate synthase, mitochondrial OS=Rattus norvegicus OX=10116 GN=Cs PE=1 SV=1
150	161	tr|G3V936|G3V936_RAT	50.03	2	2	0	1	1	1	N	51831	Citrate synthase OS=Rattus norvegicus OX=10116 GN=Cs PE=1 SV=1
198	234	tr|Q06QK5|Q06QK5_RAT	46.65	2	2	2808500	1	1	1	N	68606	NADH-ubiquinone oxidoreductase chain 5 OS=Rattus norvegicus OX=10116 GN=ND5 PE=3 SV=1
198	235	P11661|NU5M_RAT	46.65	2	2	2808500	1	1	1	N	68618	NADH-ubiquinone oxidoreductase chain 5 OS=Rattus norvegicus OX=10116 GN=Mtnd5 PE=3 SV=3
198	239	tr|Q06QG6|Q06QG6_RAT	46.65	2	2	2808500	1	1	1	N	68588	NADH-ubiquinone oxidoreductase chain 5 OS=Rattus norvegicus OX=10116 GN=ND5 PE=3 SV=1
198	236	tr|Q06QA1|Q06QA1_RAT	46.65	2	2	2808500	1	1	1	N	68574	NADH-ubiquinone oxidoreductase chain 5 OS=Rattus norvegicus OX=10116 GN=ND5 PE=3 SV=1
198	240	tr|A7XYD5|A7XYD5_RAT	46.65	2	2	2808500	1	1	1	N	68856	NADH-ubiquinone oxidoreductase chain 5 OS=Rattus norvegicus OX=10116 GN=Nd5 PE=3 SV=1
198	237	tr|Q8SEZ0|Q8SEZ0_RAT	46.65	2	2	2808500	1	1	1	N	68618	NADH-ubiquinone oxidoreductase chain 5 OS=Rattus norvegicus OX=10116 GN=Mt-nd5 PE=3 SV=1
198	238	tr|A0A096XKT9|A0A096XKT9_RAT	46.65	2	2	2808500	1	1	1	N	68584	NADH-ubiquinone oxidoreductase chain 5 OS=Rattus norvegicus OX=10116 GN=ND5 PE=3 SV=1
198	241	tr|A7XYC1|A7XYC1_RAT	46.65	2	2	2808500	1	1	1	N	68841	NADH-ubiquinone oxidoreductase chain 5 OS=Rattus norvegicus OX=10116 GN=Nd5 PE=3 SV=1
198	242	tr|A0A0A1FZN8|A0A0A1FZN8_RAT	46.65	2	2	2808500	1	1	1	N	68970	NADH-ubiquinone oxidoreductase chain 5 OS=Rattus norvegicus OX=10116 GN=ND5 PE=3 SV=1
89	113	tr|B2RYW3|B2RYW3_RAT	44.46	11	11	1696700	2	2	2	N	21892	NADH dehydrogenase (Ubiquinone) 1 beta subcomplex, 9 OS=Rattus norvegicus OX=10116 GN=Ndufb9 PE=1 SV=1
86	80	tr|S5RZM8|S5RZM8_RAT	44.27	7	7	2403600	2	2	2	Y	25958	Cytochrome c oxidase subunit 2 OS=Rattus norvegicus OX=10116 GN=COX2 PE=3 SV=1
86	81	P00406|COX2_RAT	44.27	7	7	2403600	2	2	2	Y	25928	Cytochrome c oxidase subunit 2 OS=Rattus norvegicus OX=10116 GN=Mtco2 PE=1 SV=3
86	68	tr|Q5UAJ6|Q5UAJ6_RAT	44.27	7	7	2403600	2	2	2	Y	25942	Cytochrome c oxidase subunit 2 OS=Rattus norvegicus OX=10116 GN=COX2 PE=3 SV=1
86	109	tr|Q37652|Q37652_RAT	44.27	7	7	2403600	2	2	2	Y	26007	Cytochrome c oxidase subunit 2 OS=Rattus norvegicus OX=10116 GN=COXII PE=3 SV=1
86	82	tr|Q8SEZ5|Q8SEZ5_RAT	44.27	7	7	2403600	2	2	2	Y	25928	Cytochrome c oxidase subunit 2 OS=Rattus norvegicus OX=10116 GN=Mt-co2 PE=1 SV=1
86	83	tr|A0A097PE04|A0A097PE04_RAT	44.27	7	7	2403600	2	2	2	Y	25894	Cytochrome c oxidase subunit 2 OS=Rattus norvegicus OX=10116 GN=COX2 PE=3 SV=1
87	60	tr|B0BNE6|B0BNE6_RAT	43.56	8	8	129890	2	2	2	Y	23970	NADH dehydrogenase (Ubiquinone) Fe-S protein 8 (Predicted), isoform CRA_a OS=Rattus norvegicus OX=10116 GN=Ndufs8 PE=1 SV=1
154	15	Q68FY0|QCR1_RAT	43.38	5	5	0	1	1	1	N	52849	Cytochrome b-c1 complex subunit 1, mitochondrial OS=Rattus norvegicus OX=10116 GN=Uqcrc1 PE=1 SV=1
50	1061	tr|D3ZKG9|D3ZKG9_RAT	41.98	2	2	6711400	3	2	3	Y	145348	Clustered mitochondria protein homolog OS=Rattus norvegicus OX=10116 GN=Cluh PE=1 SV=3
50	1062	tr|A0A0U1RRV5|A0A0U1RRV5_RAT	41.98	2	2	6711400	3	2	3	Y	151165	Clustered mitochondria protein homolog OS=Rattus norvegicus OX=10116 GN=Cluh PE=1 SV=1
199	88	tr|D4A3V2|D4A3V2_RAT	41.62	8	8	621300	1	1	1	N	15224	NADH dehydrogenase [ubiquinone] 1 alpha subcomplex subunit 6 OS=Rattus norvegicus OX=10116 GN=Ndufa6 PE=1 SV=1
149	1110	Q06437|ODPAT_RAT	39.87	3	3	1103200	1	1	1	N	43393	Pyruvate dehydrogenase E1 component subunit alpha, testis-specific form, mitochondrial OS=Rattus norvegicus OX=10116 GN=Pdha2 PE=1 SV=1
200	228	tr|Q7TP12|Q7TP12_RAT	39.81	10	10	1252600	1	1	1	N	14969	Cc2-17 OS=Rattus norvegicus OX=10116 GN=Sqor PE=1 SV=1
200	38	tr|B0BMT9|B0BMT9_RAT	39.81	3	3	1252600	1	1	1	N	50202	Sqrdl protein OS=Rattus norvegicus OX=10116 GN=Sqor PE=1 SV=1
125	96	tr|D3ZFJ6|D3ZFJ6_RAT	37.93	7	7	889180	1	1	1	N	60420	Lactamase, beta OS=Rattus norvegicus OX=10116 GN=Lactb PE=1 SV=1
201	276	tr|F1LTG5|F1LTG5_RAT	37.15	14	14	1812200	1	1	1	N	13829	Uncharacterized protein OS=Rattus norvegicus OX=10116 PE=4 SV=2
201	133	P12075|COX5B_RAT	37.15	14	14	1812200	1	1	1	N	13915	Cytochrome c oxidase subunit 5B, mitochondrial OS=Rattus norvegicus OX=10116 GN=Cox5b PE=1 SV=2
31	539	F1M775|DIAP1_RAT	36.97	2	2	21662000	3	3	5	Y	140418	Protein diaphanous homolog 1 OS=Rattus norvegicus OX=10116 GN=Diaph1 PE=1 SV=3
95	365	tr|G3V8G1|G3V8G1_RAT	33.48	1	1	12791000	2	1	2	Y	137113	ATP/GTP binding protein 1 (Predicted), isoform CRA_a OS=Rattus norvegicus OX=10116 GN=Agtpbp1 PE=4 SV=1
93	484	Q80W57|ABCG2_RAT	33.48	3	3	3650700	2	1	2	N	72961	Broad substrate specificity ATP-binding cassette transporter ABCG2 OS=Rattus norvegicus OX=10116 GN=Abcg2 PE=1 SV=1
202	373	Q641Y8|DDX1_RAT	31.84	2	2	1115600	1	1	1	Y	82497	ATP-dependent RNA helicase DDX1 OS=Rattus norvegicus OX=10116 GN=Ddx1 PE=1 SV=1
74	482	tr|D3ZXA6|D3ZXA6_RAT	29.61	3	3	2048500	2	2	2	N	98819	Pyruvate dehydrogenase phosphatase regulatory subunit OS=Rattus norvegicus OX=10116 GN=Pdpr PE=1 SV=1
69	321	tr|F1LNF0|F1LNF0_RAT	29.17	1	1	4369000	2	2	2	N	228912	Myosin heavy chain 14 OS=Rattus norvegicus OX=10116 GN=Myh14 PE=1 SV=1
47	421	P11497|ACACA_RAT	28.67	1	1	1605200	3	2	3	Y	265191	Acetyl-CoA carboxylase 1 OS=Rattus norvegicus OX=10116 GN=Acaca PE=1 SV=1
203	941	tr|D4A6J4|D4A6J4_RAT	2020-09-28	1	1	1023600	1	1	1	N	111741	DNA topoisomerase OS=Rattus norvegicus OX=10116 GN=Top3a PE=3 SV=3
75	515	tr|A0A0G2K5L6|A0A0G2K5L6_RAT	27.72	1	1	0	2	1	2	Y	275755	Acetyl-CoA carboxylase beta OS=Rattus norvegicus OX=10116 GN=Acacb PE=1 SV=1
75	516	tr|A0A0G2K1F2|A0A0G2K1F2_RAT	27.72	1	1	0	2	1	2	Y	276393	Acetyl-CoA carboxylase beta OS=Rattus norvegicus OX=10116 GN=Acacb PE=1 SV=1
75	518	tr|D3ZBE2|D3ZBE2_RAT	27.72	1	1	0	2	1	2	Y	275967	Acetyl-CoA carboxylase beta OS=Rattus norvegicus OX=10116 GN=Acacb PE=1 SV=3
75	519	tr|E9PSQ0|E9PSQ0_RAT	27.72	1	1	0	2	1	2	Y	276255	Acetyl-CoA carboxylase beta OS=Rattus norvegicus OX=10116 GN=Acacb PE=1 SV=2
75	517	tr|O70151|O70151_RAT	27.72	1	1	0	2	1	2	Y	276097	Acetyl-CoA carboxylase OS=Rattus norvegicus OX=10116 GN=Acacb PE=2 SV=1
112	1624	tr|D3ZUJ5|D3ZUJ5_RAT	25.99	8	8	2021600	1	1	1	Y	23973	Deoxythymidylate kinase OS=Rattus norvegicus OX=10116 GN=Dtymk PE=1 SV=1
204	119	P32198|CPT1A_RAT	25.76	2	2	292360	1	1	1	N	88126	Carnitine O-palmitoyltransferase 1, liver isoform OS=Rattus norvegicus OX=10116 GN=Cpt1a PE=1 SV=2
163	4506	Q5BJQ0|COQ8A_RAT	25.69	1	1	0	1	1	1	N	72226	Atypical kinase COQ8A, mitochondrial OS=Rattus norvegicus OX=10116 GN=Coq8a PE=2 SV=1
159	784	tr|A0A0G2JX15|A0A0G2JX15_RAT	2020-10-25	1	1	715910	1	1	1	N	121101	Cation-transporting ATPase OS=Rattus norvegicus OX=10116 GN=Atp13a2 PE=3 SV=1
92	4509	Q06645|AT5G1_RAT	24.35	5	5	11261000	1	1	2	N	14244	ATP synthase F(0) complex subunit C1, mitochondrial OS=Rattus norvegicus OX=10116 GN=Atp5mc1 PE=1 SV=1
92	4510	tr|Q499S2|Q499S2_RAT	24.35	5	5	11261000	1	1	2	N	14745	ATP synthase F(0) complex subunit C3, mitochondrial OS=Rattus norvegicus OX=10116 GN=Atp5mc3 PE=2 SV=1
92	4511	Q06646|AT5G2_RAT	24.35	5	5	11261000	1	1	2	N	14918	ATP synthase F(0) complex subunit C2, mitochondrial OS=Rattus norvegicus OX=10116 GN=Atp5mc2 PE=1 SV=1
92	4512	Q71S46|AT5G3_RAT	24.35	5	5	11261000	1	1	2	N	14693	ATP synthase F(0) complex subunit C3, mitochondrial OS=Rattus norvegicus OX=10116 GN=Atp5mc3 PE=1 SV=1
92	4513	tr|A0A0G2JTN8|A0A0G2JTN8_RAT	24.35	5	5	11261000	1	1	2	N	15465	ATP synthase F(0) complex subunit C2, mitochondrial OS=Rattus norvegicus OX=10116 GN=Atp5mc2 PE=3 SV=1
81	701	tr|F1LMJ8|F1LMJ8_RAT	24.29	5	5	6004200	2	2	2	N	49215	Calcium uptake protein 2, mitochondrial OS=Rattus norvegicus OX=10116 GN=Micu2 PE=1 SV=1
160	1534	tr|D3ZSM9|D3ZSM9_RAT	24.20	1	1	934160	1	1	1	Y	88476	BRCA1-associated ATM activator 1 OS=Rattus norvegicus OX=10116 GN=Brat1 PE=1 SV=3
120	549	P05708|HXK1_RAT	24.14	1	1	540180	1	1	1	N	102408	Hexokinase-1 OS=Rattus norvegicus OX=10116 GN=Hk1 PE=1 SV=4
120	533	tr|M0RAQ6|M0RAQ6_RAT	24.14	1	1	540180	1	1	1	N	99557	Hexokinase-1 OS=Rattus norvegicus OX=10116 GN=Hk1 PE=1 SV=2
120	468	Q63704|CPT1B_RAT	24.14	1	1	540180	1	1	1	N	88217	Carnitine O-palmitoyltransferase 1, muscle isoform OS=Rattus norvegicus OX=10116 GN=Cpt1b PE=1 SV=1
120	489	F1LN46|CPT1C_RAT	24.14	1	1	540180	1	1	1	N	90170	Carnitine O-palmitoyltransferase 1, brain isoform OS=Rattus norvegicus OX=10116 GN=Cpt1c PE=1 SV=1
208	137	Q9WVK7|HCDH_RAT	23.96	3	3	0	1	1	1	N	34448	Hydroxyacyl-coenzyme A dehydrogenase, mitochondrial OS=Rattus norvegicus OX=10116 GN=Hadh PE=2 SV=1
94	4538	tr|B1WBM1|B1WBM1_RAT	23.77	3	3	949520	2	1	2	Y	58354	FAST kinase domain-containing protein 3, mitochondrial OS=Rattus norvegicus OX=10116 GN=Fastkd3 PE=2 SV=1
94	4541	Q68FN9|FAKD3_RAT	23.77	2	2	949520	2	1	2	Y	75248	FAST kinase domain-containing protein 3, mitochondrial OS=Rattus norvegicus OX=10116 GN=Fastkd3 PE=2 SV=2
209	4519	tr|D3ZA45|D3ZA45_RAT	23.63	2	2	8430000	1	1	1	N	52491	Autophagy-related protein 13 OS=Rattus norvegicus OX=10116 GN=Atg13 PE=1 SV=2
107	162	tr|D3Z900|D3Z900_RAT	23.39	3	3	0	1	1	1	N	38239	Mitochondrial amidoxime reducing component 2 OS=Rattus norvegicus OX=10116 GN=Marc2 PE=1 SV=2
107	163	O88994|MARC2_RAT	23.39	3	3	0	1	1	1	N	38249	Mitochondrial amidoxime reducing component 2 OS=Rattus norvegicus OX=10116 GN=Marc2 PE=2 SV=1
107	164	tr|M0R6N2|M0R6N2_RAT	23.39	3	3	0	1	1	1	N	38175	MOSC domain-containing protein 2, mitochondrial-like OS=Rattus norvegicus OX=10116 GN=LOC100910481 PE=1 SV=1
127	4501	tr|F1LUC0|F1LUC0_RAT	2020-03-23	1	1	0	1	1	1	Y	72937	Similar to RIKEN cDNA 5730410E15 gene (Predicted), isoform CRA_a OS=Rattus norvegicus OX=10116 GN=Sybu PE=1 SV=2
28	4514	tr|F1LSY7|F1LSY7_RAT	22.67	1	1	76808000	1	1	5	Y	109031	Endoplasmic reticulum to nucleus-signaling 1 OS=Rattus norvegicus OX=10116 GN=Ern1 PE=4 SV=2
28	4515	tr|A0A0G2K2H4|A0A0G2K2H4_RAT	22.67	1	1	76808000	1	1	5	Y	110150	Endoplasmic reticulum to nucleus-signaling 1 OS=Rattus norvegicus OX=10116 GN=Ern1 PE=2 SV=1
168	1019	Q2M2R8|PEX5_RAT	22.32	1	1	1913400	1	1	1	N	71022	Peroxisomal targeting signal 1 receptor OS=Rattus norvegicus OX=10116 GN=Pex5 PE=1 SV=2
170	1370	Q6IMY1|MTUS1_RAT	21.96	2	2	0	1	1	1	N	50745	Microtubule-associated tumor suppressor 1 homolog OS=Rattus norvegicus OX=10116 GN=Mtus1 PE=1 SV=1
170	1371	tr|B2GVA4|B2GVA4_RAT	21.96	2	2	0	1	1	1	N	50728	Mitochondrial tumor suppressor 1 OS=Rattus norvegicus OX=10116 GN=Mtus1 PE=2 SV=1
169	4525	tr|R9PXR4|R9PXR4_RAT	21.95	1	1	9344600	1	1	1	N	61939	Mitochondrial import receptor subunit TOM70 OS=Rattus norvegicus OX=10116 GN=Tomm70 PE=1 SV=1
169	4526	Q75Q39|TOM70_RAT	21.95	1	1	9344600	1	1	1	N	67445	Mitochondrial import receptor subunit TOM70 OS=Rattus norvegicus OX=10116 GN=Tomm70 PE=1 SV=1
100	396	P11530|DMD_RAT	21.17	0	0	1781200	1	1	1	N	425830	Dystrophin OS=Rattus norvegicus OX=10116 GN=Dmd PE=1 SV=2
98	834	tr|A0A0G2JYD4|A0A0G2JYD4_RAT	20.72	0	0	4631000	1	1	1	N	487857	Vacuolar protein sorting 13 homolog D OS=Rattus norvegicus OX=10116 GN=Vps13d PE=1 SV=1
98	835	tr|D3ZKC6|D3ZKC6_RAT	20.72	0	0	4631000	1	1	1	N	488962	Vacuolar protein sorting 13 homolog D OS=Rattus norvegicus OX=10116 GN=Vps13d PE=1 SV=1
213	4555	Q5EBA0|ERAL1_RAT	20.48	2	2	0	1	1	1	N	48379	GTPase Era, mitochondrial OS=Rattus norvegicus OX=10116 GN=Eral1 PE=2 SV=2
214	4556	Q8VIJ5|OGA_RAT	20.14	1	1	1932800	1	1	1	N	102918	Protein O-GlcNAcase OS=Rattus norvegicus OX=10116 GN=Oga PE=1 SV=1
total 162 proteins
Prepared with PEAKS ™ (bioinfor.com)

## Sheet: Monomer
Protein Group	Protein ID	Accession	-10lgP	Coverage (%)	Coverage (%) Sample 7	Area Sample 7	#Peptides	#Unique	#Spec Sample 7	PTM	Avg. Mass	Description
2	13	P15999|ATPA_RAT	488.87	85	85	5592100000	104	103	244	Y	59754	ATP synthase subunit alpha, mitochondrial OS=Rattus norvegicus OX=10116 GN=Atp5f1a PE=1 SV=2
1	9	tr|G3V6D3|G3V6D3_RAT	479.96	84	84	4460400000	75	74	248	Y	56345	ATP synthase subunit beta OS=Rattus norvegicus OX=10116 GN=Atp5f1b PE=1 SV=1
1	8	P10719|ATPB_RAT	479.96	84	84	4460400000	75	74	248	Y	56354	ATP synthase subunit beta, mitochondrial OS=Rattus norvegicus OX=10116 GN=Atp5f1b PE=1 SV=2
4	3	P07756|CPSM_RAT	398.05	45	45	315720000	63	62	76	Y	164579	Carbamoyl-phosphate synthase [ammonia], mitochondrial OS=Rattus norvegicus OX=10116 GN=Cps1 PE=1 SV=1
3	6	P52873|PYC_RAT	378.67	50	50	693540000	65	61	85	Y	129777	Pyruvate carboxylase, mitochondrial OS=Rattus norvegicus OX=10116 GN=Pc PE=1 SV=2
3	7	tr|A0A0G2JTL5|A0A0G2JTL5_RAT	378.67	46	46	693540000	65	61	85	Y	140005	Pyruvate carboxylase, mitochondrial OS=Rattus norvegicus OX=10116 GN=Pc PE=1 SV=1
7	204	P31399|ATP5H_RAT	372.39	76	76	434080000	26	26	39	Y	18763	ATP synthase subunit d, mitochondrial OS=Rattus norvegicus OX=10116 GN=Atp5pd PE=1 SV=3
6	114	P19511|AT5F1_RAT	337.53	63	63	863160000	28	28	49	Y	28869	ATP synthase F(0) complex subunit B1, mitochondrial OS=Rattus norvegicus OX=10116 GN=Atp5pb PE=1 SV=1
11	5	Q64428|ECHA_RAT	332.89	38	38	144360000	27	27	30	Y	82665	Trifunctional enzyme subunit alpha, mitochondrial OS=Rattus norvegicus OX=10116 GN=Hadha PE=1 SV=2
8	10	P22791|HMCS2_RAT	331.56	45	45	251280000	29	29	38	Y	56912	Hydroxymethylglutaryl-CoA synthase, mitochondrial OS=Rattus norvegicus OX=10116 GN=Hmgcs2 PE=1 SV=1
9	103	P04762|CATA_RAT	324.96	47	47	226900000	28	27	37	Y	59757	Catalase OS=Rattus norvegicus OX=10116 GN=Cat PE=1 SV=3
5	97	P35435|ATPG_RAT	297.27	71	71	616000000	24	24	49	Y	30191	ATP synthase subunit gamma, mitochondrial OS=Rattus norvegicus OX=10116 GN=Atp5f1c PE=1 SV=2
13	44	P16970|ABCD3_RAT	268.43	29	29	35871000	17	16	24	N	75316	ATP-binding cassette sub-family D member 3 OS=Rattus norvegicus OX=10116 GN=Abcd3 PE=1 SV=3
16	28	P18163|ACSL1_RAT	264.34	26	26	43871000	17	16	18	Y	78179	Long-chain-fatty-acid--CoA ligase 1 OS=Rattus norvegicus OX=10116 GN=Acsl1 PE=1 SV=1
14	1580	A2VCW9|AASS_RAT	261.93	19	19	41627000	17	17	20	Y	102908	Alpha-aminoadipic semialdehyde synthase, mitochondrial OS=Rattus norvegicus OX=10116 GN=Aass PE=2 SV=1
15	61	P63039|CH60_RAT	260.80	28	28	52406000	17	16	20	Y	60956	60 kDa heat shock protein, mitochondrial OS=Rattus norvegicus OX=10116 GN=Hspd1 PE=1 SV=1
15	62	tr|A0A482IDN3|A0A482IDN3_RAT	260.80	28	28	52406000	17	16	20	Y	60956	Hsp60 OS=Rattus norvegicus OX=10116 GN=Hspd1 PE=2 SV=1
10	188	Q06647|ATPO_RAT	255.92	68	68	846650000	24	24	33	Y	23398	ATP synthase subunit O, mitochondrial OS=Rattus norvegicus OX=10116 GN=Atp5po PE=1 SV=1
12	31	Q60587|ECHB_RAT	255.39	41	41	97359000	22	21	27	Y	51414	Trifunctional enzyme subunit beta, mitochondrial OS=Rattus norvegicus OX=10116 GN=Hadhb PE=1 SV=1
18	2	P10860|DHE3_RAT	245.57	26	26	59549000	13	13	17	Y	61416	Glutamate dehydrogenase 1, mitochondrial OS=Rattus norvegicus OX=10116 GN=Glud1 PE=1 SV=2
20	168	tr|G3V7Y3|G3V7Y3_RAT	243.79	61	61	183980000	10	10	14	Y	17563	ATP synthase subunit delta, mitochondrial OS=Rattus norvegicus OX=10116 GN=Atp5f1d PE=1 SV=1
21	46	P17764|THIL_RAT	236.91	27	27	17844000	11	11	13	N	44695	Acetyl-CoA acetyltransferase, mitochondrial OS=Rattus norvegicus OX=10116 GN=Acat1 PE=1 SV=1
31	15	Q68FY0|QCR1_RAT	232.07	23	23	15442000	8	8	8	Y	52849	Cytochrome b-c1 complex subunit 1, mitochondrial OS=Rattus norvegicus OX=10116 GN=Uqcrc1 PE=1 SV=1
23	32	P13086|SUCA_RAT	228.38	27	27	16128000	8	8	11	Y	36148	Succinate--CoA ligase [ADP/GDP-forming] subunit alpha, mitochondrial OS=Rattus norvegicus OX=10116 GN=Suclg1 PE=2 SV=2
23	33	tr|A0A0H2UHE1|A0A0H2UHE1_RAT	228.38	26	26	16128000	8	8	11	Y	37560	Succinate--CoA ligase [ADP/GDP-forming] subunit alpha, mitochondrial OS=Rattus norvegicus OX=10116 GN=Suclg1 PE=1 SV=1
26	1	P32551|QCR2_RAT	224.98	25	25	23364000	9	9	10	N	48396	Cytochrome b-c1 complex subunit 2, mitochondrial OS=Rattus norvegicus OX=10116 GN=Uqcrc2 PE=1 SV=2
17	55	P24329|THTR_RAT	219.50	39	39	56702000	15	15	18	Y	33407	Thiosulfate sulfurtransferase OS=Rattus norvegicus OX=10116 GN=Tst PE=1 SV=3
22	64	Q02253|MMSA_RAT	215.93	22	22	20733000	11	11	11	Y	57808	Methylmalonate-semialdehyde dehydrogenase [acylating], mitochondrial OS=Rattus norvegicus OX=10116 GN=Aldh6a1 PE=1 SV=1
22	65	tr|G3V7J0|G3V7J0_RAT	215.93	22	22	20733000	11	11	11	Y	57748	Aldehyde dehydrogenase family 6, subfamily A1, isoform CRA_b OS=Rattus norvegicus OX=10116 GN=Aldh6a1 PE=1 SV=1
19	4	P00507|AATM_RAT	213.50	29	29	50146000	14	14	17	Y	47314	Aspartate aminotransferase, mitochondrial OS=Rattus norvegicus OX=10116 GN=Got2 PE=1 SV=2
32	53	B3DMA2|ACD11_RAT	206.36	13	13	10317000	8	8	8	N	87371	Acyl-CoA dehydrogenase family member 11 OS=Rattus norvegicus OX=10116 GN=Acad11 PE=1 SV=1
24	47	P0C2X9|AL4A1_RAT	205.82	19	19	25744000	9	9	11	N	61869	Delta-1-pyrroline-5-carboxylate dehydrogenase, mitochondrial OS=Rattus norvegicus OX=10116 GN=Aldh4a1 PE=1 SV=1
44	12439	Q5XIT9|MCCB_RAT	204.16	13	13	5586100	5	5	5	N	61517	Methylcrotonoyl-CoA carboxylase beta chain, mitochondrial OS=Rattus norvegicus OX=10116 GN=Mccc2 PE=2 SV=1
34	4490	Q6PDU7|ATP5L_RAT	193.65	66	66	30454000	7	7	8	Y	11433	ATP synthase subunit g, mitochondrial OS=Rattus norvegicus OX=10116 GN=Atp5mg PE=1 SV=2
27	4499	Q9JJW3|ATPMD_RAT	185.83	45	45	79179000	6	6	10	N	6408	ATP synthase membrane subunit DAPIT, mitochondrial OS=Rattus norvegicus OX=10116 GN=Atp5md PE=1 SV=1
36	56	P04636|MDHM_RAT	185.21	24	24	8121200	7	7	7	N	35684	Malate dehydrogenase, mitochondrial OS=Rattus norvegicus OX=10116 GN=Mdh2 PE=1 SV=2
38	4496	P21571|ATP5J_RAT	174.24	44	44	17048000	6	6	6	N	12494	ATP synthase-coupling factor 6, mitochondrial OS=Rattus norvegicus OX=10116 GN=Atp5pf PE=1 SV=1
30	4487	tr|Q5UAJ5|Q5UAJ5_RAT	168.07	55	55	137000000	4	4	9	Y	7642	ATP synthase protein 8 OS=Rattus norvegicus OX=10116 GN=ATP8 PE=3 SV=1
29	119	P32198|CPT1A_RAT	165.28	13	13	6892600	8	8	9	Y	88126	Carnitine O-palmitoyltransferase 1, liver isoform OS=Rattus norvegicus OX=10116 GN=Cpt1a PE=1 SV=2
48	92	tr|Q5M9H2|Q5M9H2_RAT	160.33	9	9	8584400	4	4	4	N	70821	Acyl-Coenzyme A dehydrogenase, very long chain OS=Rattus norvegicus OX=10116 GN=Acadvl PE=1 SV=1
48	91	P45953|ACADV_RAT	160.33	9	9	8584400	4	4	4	N	70749	Very long-chain specific acyl-CoA dehydrogenase, mitochondrial OS=Rattus norvegicus OX=10116 GN=Acadvl PE=1 SV=1
50	5017	Q5PQT3|GLYAT_RAT	158.82	14	14	2057700	3	3	4	N	33899	Glycine N-acyltransferase OS=Rattus norvegicus OX=10116 GN=Glyat PE=2 SV=1
50	5018	tr|A4PB92|A4PB92_RAT	158.82	14	14	2057700	3	3	4	N	33899	Glycine N-acyltransferase OS=Rattus norvegicus OX=10116 GN=Glyat PE=2 SV=1
55	1310	P07872|ACOX1_RAT	154.71	7	7	2511300	3	3	3	N	74679	Peroxisomal acyl-coenzyme A oxidase 1 OS=Rattus norvegicus OX=10116 GN=Acox1 PE=1 SV=1
45	42	tr|D3ZFQ8|D3ZFQ8_RAT	145.33	14	14	8479100	4	4	5	N	35435	Cytochrome c-1 OS=Rattus norvegicus OX=10116 GN=Cyc1 PE=1 SV=3
40	22	tr|A0A0G2JVH4|A0A0G2JVH4_RAT	138.58	9	9	7827100	6	6	6	Y	86230	MICOS complex subunit MIC60 OS=Rattus norvegicus OX=10116 GN=Immt PE=1 SV=1
39	51	tr|Q5EBA4|Q5EBA4_RAT	130.16	10	10	10793000	4	4	6	N	33215	Nipsnap1 protein (Fragment) OS=Rattus norvegicus OX=10116 GN=Nipsnap1 PE=2 SV=1
39	52	tr|G3V728|G3V728_RAT	130.16	10	10	10793000	4	4	6	N	33346	4-nitrophenylphosphatase domain and non-neuronal SNAP25-like protein homolog 1 (C. elegans), isoform CRA_b OS=Rattus norvegicus OX=10116 GN=Nipsnap1 PE=1 SV=1
28	96	tr|D3ZFJ6|D3ZFJ6_RAT	129.48	18	18	21094000	8	8	9	N	60420	Lactamase, beta OS=Rattus norvegicus OX=10116 GN=Lactb PE=1 SV=1
60	66	Q8VID1|DHRS4_RAT	118.76	12	12	13709000	3	3	3	N	29822	Dehydrogenase/reductase SDR family member 4 OS=Rattus norvegicus OX=10116 GN=Dhrs4 PE=2 SV=2
33	39	P29147|BDH_RAT	117.79	10	10	15385000	8	8	8	Y	38202	D-beta-hydroxybutyrate dehydrogenase, mitochondrial OS=Rattus norvegicus OX=10116 GN=Bdh1 PE=1 SV=2
33	40	tr|A0A0G2JSH2|A0A0G2JSH2_RAT	117.79	10	10	15385000	8	8	8	Y	38333	3-hydroxybutyrate dehydrogenase, type 1, isoform CRA_a OS=Rattus norvegicus OX=10116 GN=Bdh1 PE=1 SV=1
25	4486	P29419|ATP5I_RAT	115.83	55	55	92867000	7	7	11	N	8255	ATP synthase subunit e, mitochondrial OS=Rattus norvegicus OX=10116 GN=Atp5me PE=1 SV=3
66	133	P12075|COX5B_RAT	112.28	30	30	6379300	3	3	3	N	13915	Cytochrome c oxidase subunit 5B, mitochondrial OS=Rattus norvegicus OX=10116 GN=Cox5b PE=1 SV=2
65	111	Q5RJR8|LRC59_RAT	112.19	10	10	2438700	3	3	3	Y	34869	Leucine-rich repeat-containing protein 59 OS=Rattus norvegicus OX=10116 GN=Lrrc59 PE=1 SV=1
81	117	tr|G3V734|G3V734_RAT	111.64	10	10	3269600	2	2	2	N	36133	2,4-dienoyl CoA reductase 1, mitochondrial, isoform CRA_a OS=Rattus norvegicus OX=10116 GN=Decr1 PE=1 SV=1
81	118	Q64591|DECR_RAT	111.64	10	10	3269600	2	2	2	N	36133	2,4-dienoyl-CoA reductase, mitochondrial OS=Rattus norvegicus OX=10116 GN=Decr1 PE=1 SV=2
89	176	P08011|MGST1_RAT	111.12	19	19	1746700	2	2	2	Y	17472	Microsomal glutathione S-transferase 1 OS=Rattus norvegicus OX=10116 GN=Mgst1 PE=1 SV=3
89	177	tr|B6DYQ4|B6DYQ4_RAT	111.12	19	19	1746700	2	2	2	Y	17472	Microsomal glutathione S-transferase OS=Rattus norvegicus OX=10116 GN=Mgst1 PE=2 SV=1
52	45	P20788|UCRI_RAT	108.70	17	17	5644100	4	4	4	N	29446	Cytochrome b-c1 complex subunit Rieske, mitochondrial OS=Rattus norvegicus OX=10116 GN=Uqcrfs1 PE=1 SV=2
35	4488	D3ZAF6|ATPK_RAT	108.39	47	47	33896000	7	6	8	Y	10452	ATP synthase subunit f, mitochondrial OS=Rattus norvegicus OX=10116 GN=Atp5mf PE=1 SV=1
56	4532	Q5XIN6|LETM1_RAT	106.67	7	7	2969100	3	3	3	N	83060	Mitochondrial proton/calcium exchanger protein OS=Rattus norvegicus OX=10116 GN=Letm1 PE=1 SV=1
53	8241	tr|F1LM33|F1LM33_RAT	105.60	2	2	2652900	3	3	3	Y	156679	Leucine-rich PPR motif-containing protein, mitochondrial OS=Rattus norvegicus OX=10116 GN=Lrpprc PE=1 SV=2
53	8242	Q5SGE0|LPPRC_RAT	105.60	2	2	2652900	3	3	3	Y	156652	Leucine-rich PPR motif-containing protein, mitochondrial OS=Rattus norvegicus OX=10116 GN=Lrpprc PE=1 SV=1
49	416	tr|F1M953|F1M953_RAT	102.45	7	7	2133600	4	4	4	N	73745	Stress-70 protein, mitochondrial OS=Rattus norvegicus OX=10116 GN=Hspa9 PE=1 SV=1
49	417	P48721|GRP75_RAT	102.45	7	7	2133600	4	4	4	N	73858	Stress-70 protein, mitochondrial OS=Rattus norvegicus OX=10116 GN=Hspa9 PE=1 SV=3
155	244	Q66H15|RMD3_RAT	101.79	5	5	335860	1	1	1	N	52312	Regulator of microtubule dynamics protein 3 OS=Rattus norvegicus OX=10116 GN=Rmdn3 PE=1 SV=1
37	63	Q09073|ADT2_RAT	101.27	16	16	9141500	6	6	6	Y	32901	ADP/ATP translocase 2 OS=Rattus norvegicus OX=10116 GN=Slc25a5 PE=1 SV=3
51	76	O70351|HCD2_RAT	100.59	18	18	6197400	4	4	4	N	27246	3-hydroxyacyl-CoA dehydrogenase type-2 OS=Rattus norvegicus OX=10116 GN=Hsd17b10 PE=1 SV=3
51	77	tr|B0BMW2|B0BMW2_RAT	100.59	18	18	6197400	4	4	4	N	27250	3-hydroxyacyl-CoA dehydrogenase type-2 OS=Rattus norvegicus OX=10116 GN=Hsd17b10 PE=1 SV=1
72	79	tr|A0A0H2UHN7|A0A0H2UHN7_RAT	99.93	7	7	1143900	2	2	2	N	62492	RCG24013, isoform CRA_a OS=Rattus norvegicus OX=10116 GN=Cyp27a1 PE=1 SV=1
72	78	P17178|CP27A_RAT	99.93	7	7	1143900	2	2	2	N	60733	Sterol 26-hydroxylase, mitochondrial OS=Rattus norvegicus OX=10116 GN=Cyp27a1 PE=1 SV=1
96	158	P11240|COX5A_RAT	96.56	10	10	1361900	1	1	2	N	16130	Cytochrome c oxidase subunit 5A, mitochondrial OS=Rattus norvegicus OX=10116 GN=Cox5a PE=1 SV=1
63	282	P19804|NDKB_RAT	95.49	20	20	6514400	3	3	3	N	17283	Nucleoside diphosphate kinase B OS=Rattus norvegicus OX=10116 GN=Nme2 PE=1 SV=1
64	48	Q9WVK3|PECR_RAT	91.06	9	9	7976400	3	3	3	N	32433	Peroxisomal trans-2-enoyl-CoA reductase OS=Rattus norvegicus OX=10116 GN=Pecr PE=2 SV=1
64	49	tr|A0A0G2JVG4|A0A0G2JVG4_RAT	91.06	9	9	7976400	3	3	3	N	32737	Peroxisomal trans-2-enoyl-CoA reductase OS=Rattus norvegicus OX=10116 GN=Pecr PE=1 SV=1
42	1035	Q9Z2L0|VDAC1_RAT	90.61	18	18	3497000	5	4	5	Y	30756	Voltage-dependent anion-selective channel protein 1 OS=Rattus norvegicus OX=10116 GN=Vdac1 PE=1 SV=4
46	4489	P29418|ATP5E_RAT	88.50	55	55	71086000	4	4	5	Y	5767	ATP synthase subunit epsilon, mitochondrial OS=Rattus norvegicus OX=10116 GN=Atp5f1e PE=1 SV=2
203	254	tr|Q7H115|Q7H115_RAT	85.02	5	5	410410	1	1	1	N	29871	Cytochrome c oxidase subunit 3 OS=Rattus norvegicus OX=10116 GN=Mt-co3 PE=3 SV=1
203	255	tr|I6V4L9|I6V4L9_RAT	85.02	5	5	410410	1	1	1	N	29844	Cytochrome c oxidase subunit 3 OS=Rattus norvegicus OX=10116 GN=COX3 PE=3 SV=1
203	256	tr|Q8M7G4|Q8M7G4_RAT	85.02	5	5	410410	1	1	1	N	29861	Cytochrome c oxidase subunit 3 OS=Rattus norvegicus OX=10116 PE=2 SV=1
203	257	tr|A0A096XKT2|A0A096XKT2_RAT	85.02	5	5	410410	1	1	1	N	29901	Cytochrome c oxidase subunit 3 OS=Rattus norvegicus OX=10116 GN=COX3 PE=3 SV=1
203	258	P05505|COX3_RAT	85.02	5	5	410410	1	1	1	N	29871	Cytochrome c oxidase subunit 3 OS=Rattus norvegicus OX=10116 GN=Mtco3 PE=1 SV=5
203	259	tr|Q8SEZ2|Q8SEZ2_RAT	85.02	5	5	410410	1	1	1	N	29870	Cytochrome c oxidase subunit 3 (Fragment) OS=Rattus norvegicus OX=10116 GN=COIII PE=3 SV=1
204	12427	tr|F1LP30|F1LP30_RAT	77.89	3	3	845590	1	1	1	N	79296	Methylcrotonoyl-CoA carboxylase subunit alpha, mitochondrial OS=Rattus norvegicus OX=10116 GN=Mccc1 PE=1 SV=1
204	12428	Q5I0C3|MCCA_RAT	77.89	3	3	845590	1	1	1	N	79330	Methylcrotonoyl-CoA carboxylase subunit alpha, mitochondrial OS=Rattus norvegicus OX=10116 GN=Mccc1 PE=1 SV=1
57	80	tr|S5RZM8|S5RZM8_RAT	74.72	11	11	5183300	3	3	3	Y	25958	Cytochrome c oxidase subunit 2 OS=Rattus norvegicus OX=10116 GN=COX2 PE=3 SV=1
57	81	P00406|COX2_RAT	74.72	11	11	5183300	3	3	3	Y	25928	Cytochrome c oxidase subunit 2 OS=Rattus norvegicus OX=10116 GN=Mtco2 PE=1 SV=3
57	68	tr|Q5UAJ6|Q5UAJ6_RAT	74.72	11	11	5183300	3	3	3	Y	25942	Cytochrome c oxidase subunit 2 OS=Rattus norvegicus OX=10116 GN=COX2 PE=3 SV=1
57	109	tr|Q37652|Q37652_RAT	74.72	11	11	5183300	3	3	3	Y	26007	Cytochrome c oxidase subunit 2 OS=Rattus norvegicus OX=10116 GN=COXII PE=3 SV=1
57	82	tr|Q8SEZ5|Q8SEZ5_RAT	74.72	11	11	5183300	3	3	3	Y	25928	Cytochrome c oxidase subunit 2 OS=Rattus norvegicus OX=10116 GN=Mt-co2 PE=1 SV=1
57	83	tr|A0A097PE04|A0A097PE04_RAT	74.72	11	11	5183300	3	3	3	Y	25894	Cytochrome c oxidase subunit 2 OS=Rattus norvegicus OX=10116 GN=COX2 PE=3 SV=1
59	50	P10888|COX41_RAT	74.54	17	17	7908300	3	3	3	N	19515	Cytochrome c oxidase subunit 4 isoform 1, mitochondrial OS=Rattus norvegicus OX=10116 GN=Cox4i1 PE=1 SV=1
205	145	P62909|RS3_RAT	74.18	7	7	1028500	1	1	1	Y	26674	40S ribosomal protein S3 OS=Rattus norvegicus OX=10116 GN=Rps3 PE=1 SV=1
207	12424	tr|G3V7I0|G3V7I0_RAT	73.93	4	4	998460	1	1	1	N	28299	Peroxiredoxin 3 OS=Rattus norvegicus OX=10116 GN=Prdx3 PE=1 SV=1
207	12425	Q9Z0V6|PRDX3_RAT	73.93	4	4	998460	1	1	1	N	28295	Thioredoxin-dependent peroxide reductase, mitochondrial OS=Rattus norvegicus OX=10116 GN=Prdx3 PE=1 SV=2
206	12874	Q6MGB5|DHB8_RAT	72.97	5	5	504990	1	1	1	N	26791	Estradiol 17-beta-dehydrogenase 8 OS=Rattus norvegicus OX=10116 GN=Hsd17b8 PE=1 SV=1
67	1593	tr|Q8M7G5|Q8M7G5_RAT	70.24	7	7	1908800	2	1	3	N	24240	ATP synthase subunit a (Fragment) OS=Rattus norvegicus OX=10116 PE=2 SV=1
67	1594	tr|Q549I0|Q549I0_RAT	70.24	7	7	1908800	2	1	3	N	25050	ATP synthase subunit a OS=Rattus norvegicus OX=10116 GN=atp6 PE=4 SV=1
67	1595	P05504|ATP6_RAT	70.24	7	7	1908800	2	1	3	N	25076	ATP synthase subunit a OS=Rattus norvegicus OX=10116 GN=Mt-atp6 PE=1 SV=3
67	1596	tr|Q8HIC7|Q8HIC7_RAT	70.24	7	7	1908800	2	1	3	N	25076	ATP synthase subunit a OS=Rattus norvegicus OX=10116 GN=Mt-atp6 PE=4 SV=1
67	1597	tr|S5S1E9|S5S1E9_RAT	70.24	7	7	1908800	2	1	3	N	25049	ATP synthase subunit a OS=Rattus norvegicus OX=10116 GN=ATP6 PE=4 SV=1
67	1598	tr|Q06QE5|Q06QE5_RAT	70.24	7	7	1908800	2	1	3	N	25075	ATP synthase subunit a OS=Rattus norvegicus OX=10116 GN=ATP6 PE=4 SV=1
67	1599	tr|Q8SEZ3|Q8SEZ3_RAT	70.24	7	7	1908800	2	1	3	N	25030	ATP synthase subunit a OS=Rattus norvegicus OX=10116 GN=ATPase6 PE=4 SV=1
73	38	tr|B0BMT9|B0BMT9_RAT	67.51	3	3	2672100	1	1	2	N	50202	Sqrdl protein OS=Rattus norvegicus OX=10116 GN=Sqor PE=1 SV=1
58	162	tr|D3Z900|D3Z900_RAT	67.29	7	7	4790300	3	3	3	N	38239	Mitochondrial amidoxime reducing component 2 OS=Rattus norvegicus OX=10116 GN=Marc2 PE=1 SV=2
58	163	O88994|MARC2_RAT	67.29	7	7	4790300	3	3	3	N	38249	Mitochondrial amidoxime reducing component 2 OS=Rattus norvegicus OX=10116 GN=Marc2 PE=2 SV=1
58	164	tr|M0R6N2|M0R6N2_RAT	67.29	7	7	4790300	3	3	3	N	38175	MOSC domain-containing protein 2, mitochondrial-like OS=Rattus norvegicus OX=10116 GN=LOC100910481 PE=1 SV=1
82	248	tr|G3V6I4|G3V6I4_RAT	64.95	5	5	1660600	2	2	2	N	37791	Mitochondrial amidoxime reducing component 1 OS=Rattus norvegicus OX=10116 GN=Marc1 PE=1 SV=1
90	137	Q9WVK7|HCDH_RAT	61.57	4	4	2042300	2	2	2	N	34448	Hydroxyacyl-coenzyme A dehydrogenase, mitochondrial OS=Rattus norvegicus OX=10116 GN=Hadh PE=2 SV=1
208	409	P56574|IDHP_RAT	59.41	2	2	621240	1	1	1	N	50967	Isocitrate dehydrogenase [NADP], mitochondrial OS=Rattus norvegicus OX=10116 GN=Idh2 PE=1 SV=2
84	141	Q924S5|LONM_RAT	54.31	2	2	1413600	2	2	2	Y	105792	Lon protease homolog, mitochondrial OS=Rattus norvegicus OX=10116 GN=Lonp1 PE=2 SV=1
54	459	tr|F1LPI6|F1LPI6_RAT	53.88	1	1	3637800	3	2	3	N	200075	Peripheral-type benzodiazepine receptor-associated protein 1 OS=Rattus norvegicus OX=10116 GN=Tspoap1 PE=4 SV=1
54	460	Q9JIR0|RIMB1_RAT	53.88	1	1	3637800	3	2	3	N	200202	Peripheral-type benzodiazepine receptor-associated protein 1 OS=Rattus norvegicus OX=10116 GN=Tspoap1 PE=1 SV=2
209	1706	Q63716|PRDX1_RAT	53.40	6	6	2002900	1	1	1	N	22109	Peroxiredoxin-1 OS=Rattus norvegicus OX=10116 GN=Prdx1 PE=1 SV=1
61	515	tr|A0A0G2K5L6|A0A0G2K5L6_RAT	53.01	1	1	1590300	3	1	3	Y	275755	Acetyl-CoA carboxylase beta OS=Rattus norvegicus OX=10116 GN=Acacb PE=1 SV=1
61	516	tr|A0A0G2K1F2|A0A0G2K1F2_RAT	53.01	1	1	1590300	3	1	3	Y	276393	Acetyl-CoA carboxylase beta OS=Rattus norvegicus OX=10116 GN=Acacb PE=1 SV=1
61	518	tr|D3ZBE2|D3ZBE2_RAT	53.01	1	1	1590300	3	1	3	Y	275967	Acetyl-CoA carboxylase beta OS=Rattus norvegicus OX=10116 GN=Acacb PE=1 SV=3
61	519	tr|E9PSQ0|E9PSQ0_RAT	53.01	1	1	1590300	3	1	3	Y	276255	Acetyl-CoA carboxylase beta OS=Rattus norvegicus OX=10116 GN=Acacb PE=1 SV=2
210	290	tr|M0RAM5|M0RAM5_RAT	52.02	6	6	856390	1	1	1	N	22155	Glutathione peroxidase OS=Rattus norvegicus OX=10116 GN=Gpx1 PE=1 SV=1
210	291	P04041|GPX1_RAT	52.02	6	6	856390	1	1	1	N	22305	Glutathione peroxidase 1 OS=Rattus norvegicus OX=10116 GN=Gpx1 PE=1 SV=4
211	301	tr|B2RZ24|B2RZ24_RAT	49.31	2	2	922450	1	1	1	N	47388	Succinate-CoA ligase subunit beta (Fragment) OS=Rattus norvegicus OX=10116 GN=Sucla2 PE=2 SV=1
211	303	tr|F1LM47|F1LM47_RAT	49.31	2	2	922450	1	1	1	N	50306	Succinate--CoA ligase [ADP-forming] subunit beta, mitochondrial OS=Rattus norvegicus OX=10116 GN=Sucla2 PE=1 SV=1
91	12430	Q9R1Z0|VDAC3_RAT	48.96	6	6	786220	2	1	2	N	30798	Voltage-dependent anion-selective channel protein 3 OS=Rattus norvegicus OX=10116 GN=Vdac3 PE=1 SV=2
91	12431	tr|A0A0G2JSR0|A0A0G2JSR0_RAT	48.96	6	6	786220	2	1	2	N	30784	Voltage-dependent anion-selective channel protein 3 OS=Rattus norvegicus OX=10116 GN=Vdac3 PE=1 SV=1
91	1402	P81155|VDAC2_RAT	48.96	5	5	786220	2	1	2	N	31746	Voltage-dependent anion-selective channel protein 2 OS=Rattus norvegicus OX=10116 GN=Vdac2 PE=1 SV=2
138	160	Q8VHF5|CISY_RAT	48.65	2	2	1553600	1	1	1	N	51867	Citrate synthase, mitochondrial OS=Rattus norvegicus OX=10116 GN=Cs PE=1 SV=1
138	161	tr|G3V936|G3V936_RAT	48.65	2	2	1553600	1	1	1	N	51831	Citrate synthase OS=Rattus norvegicus OX=10116 GN=Cs PE=1 SV=1
68	1710	D3ZHR2|ABCD1_RAT	46.99	2	2	755240	3	1	3	N	81938	ATP-binding cassette sub-family D member 1 OS=Rattus norvegicus OX=10116 GN=Abcd1 PE=1 SV=1
213	191	tr|B2RZD6|B2RZD6_RAT	45.95	10	10	1625700	1	1	1	N	9327	NDUFA4, mitochondrial complex-associated OS=Rattus norvegicus OX=10116 GN=Ndufa4 PE=1 SV=1
212	277	P0CG51|UBB_RAT	45.20	3	3	951350	1	1	1	N	34369	Polyubiquitin-B OS=Rattus norvegicus OX=10116 GN=Ubb PE=1 SV=1
214	269	tr|A0A0G2K642|A0A0G2K642_RAT	43.47	4	4	2627400	1	1	1	N	41754	3-ketoacyl-CoA thiolase, mitochondrial OS=Rattus norvegicus OX=10116 GN=Acaa2 PE=1 SV=1
214	270	P13437|THIM_RAT	43.47	4	4	2627400	1	1	1	N	41871	3-ketoacyl-CoA thiolase, mitochondrial OS=Rattus norvegicus OX=10116 GN=Acaa2 PE=1 SV=1
214	271	tr|G3V9U2|G3V9U2_RAT	43.47	4	4	2627400	1	1	1	N	41885	3-ketoacyl-CoA thiolase, mitochondrial OS=Rattus norvegicus OX=10116 GN=Acaa2 PE=1 SV=3
215	4531	P06761|BIP_RAT	42.77	2	2	431510	1	1	1	N	72347	Endoplasmic reticulum chaperone BiP OS=Rattus norvegicus OX=10116 GN=Hspa5 PE=1 SV=1
137	4731	tr|A0A0G2K3W1|A0A0G2K3W1_RAT	41.44	2	2	347510	1	1	1	N	53760	von Willebrand factor A domain-containing 8 OS=Rattus norvegicus OX=10116 GN=Vwa8 PE=1 SV=1
216	31543	tr|B2RYM8|B2RYM8_RAT	39.01	7	7	68923	1	1	1	N	20157	Family with sequence similarity 210, member B OS=Rattus norvegicus OX=10116 GN=Fam210b PE=1 SV=1
93	4920	tr|F1LPV8|F1LPV8_RAT	38.94	3	3	1047100	2	2	2	N	46639	Succinate--CoA ligase [GDP-forming] subunit beta, mitochondrial OS=Rattus norvegicus OX=10116 GN=Suclg2 PE=1 SV=2
93	1660	tr|B1H270|B1H270_RAT	38.94	3	3	1047100	2	2	2	N	46988	Succinate--CoA ligase [GDP-forming] subunit beta, mitochondrial OS=Rattus norvegicus OX=10116 GN=Suclg2 PE=2 SV=1
69	1344	D3ZG52|DNA2_RAT	37.97	1	1	31878000	3	2	3	N	119588	DNA replication ATP-dependent helicase/nuclease DNA2 OS=Rattus norvegicus OX=10116 GN=Dna2 PE=3 SV=1
69	1345	tr|A0A0H2UH92|A0A0H2UH92_RAT	37.97	1	1	31878000	3	2	3	N	136526	Graves disease carrier protein OS=Rattus norvegicus OX=10116 GN=Slc25a16 PE=1 SV=1
47	834	tr|A0A0G2JYD4|A0A0G2JYD4_RAT	37.97	0	0	24109000	3	3	4	N	487857	Vacuolar protein sorting 13 homolog D OS=Rattus norvegicus OX=10116 GN=Vps13d PE=1 SV=1
47	835	tr|D3ZKC6|D3ZKC6_RAT	37.97	0	0	24109000	3	3	4	N	488962	Vacuolar protein sorting 13 homolog D OS=Rattus norvegicus OX=10116 GN=Vps13d PE=1 SV=1
217	680	tr|A0A0G2K7K2|A0A0G2K7K2_RAT	37.91	2	2	239570	1	1	1	N	66134	Apoptosis-inducing factor 1, mitochondrial OS=Rattus norvegicus OX=10116 GN=Aifm1 PE=1 SV=1
217	681	Q9JM53|AIFM1_RAT	37.91	2	2	239570	1	1	1	N	66723	Apoptosis-inducing factor 1, mitochondrial OS=Rattus norvegicus OX=10116 GN=Aifm1 PE=1 SV=1
218	4992	P80431|COX7B_RAT	37.86	9	9	290430	1	1	1	N	8995	Cytochrome c oxidase subunit 7B, mitochondrial OS=Rattus norvegicus OX=10116 GN=Cox7b PE=1 SV=3
85	12478	Q5BK22|GTPB8_RAT	35.74	7	7	2574300	2	2	2	Y	32232	GTP-binding protein 8 OS=Rattus norvegicus OX=10116 GN=Gtpbp8 PE=2 SV=1
105	8253	Q5BJS0|DHX30_RAT	34.16	1	1	4048900	2	1	2	N	133997	ATP-dependent RNA helicase DHX30 OS=Rattus norvegicus OX=10116 GN=Dhx30 PE=1 SV=1
154	8376	Q2V057|HYPDH_RAT	32.42	2	2	449640	1	1	1	N	51002	Hydroxyproline dehydrogenase OS=Rattus norvegicus OX=10116 GN=Prodh2 PE=2 SV=1
156	478	Q64578|AT2A1_RAT	31.21	1	1	2598600	1	1	1	Y	109409	Sarcoplasmic/endoplasmic reticulum calcium ATPase 1 OS=Rattus norvegicus OX=10116 GN=Atp2a1 PE=1 SV=1
77	321	tr|F1LNF0|F1LNF0_RAT	30.51	1	1	2943900	2	2	2	N	228912	Myosin heavy chain 14 OS=Rattus norvegicus OX=10116 GN=Myh14 PE=1 SV=1
100	721	Q5QJC9|BAG5_RAT	2020-11-29	3	3	2669000	2	1	2	Y	51031	BAG family molecular chaperone regulator 5 OS=Rattus norvegicus OX=10116 GN=Bag5 PE=1 SV=1
71	421	P11497|ACACA_RAT	2020-01-28	1	1	1950300	2	1	2	N	265191	Acetyl-CoA carboxylase 1 OS=Rattus norvegicus OX=10116 GN=Acaca PE=1 SV=1
101	1110	Q06437|ODPAT_RAT	26.70	5	5	11204000	2	2	2	N	43393	Pyruvate dehydrogenase E1 component subunit alpha, testis-specific form, mitochondrial OS=Rattus norvegicus OX=10116 GN=Pdha2 PE=1 SV=1
104	106	tr|D3ZXF9|D3ZXF9_RAT	25.84	6	6	2346300	2	2	2	Y	29441	Mitochondrial ribosomal protein L12 OS=Rattus norvegicus OX=10116 GN=Mrpl12 PE=1 SV=1
221	4556	Q8VIJ5|OGA_RAT	2020-05-25	1	1	969110	1	1	1	N	102918	Protein O-GlcNAcase OS=Rattus norvegicus OX=10116 GN=Oga PE=1 SV=1
98	4494	D3Z9R8|ATP68_RAT	24.24	12	12	8282000	1	1	2	Y	6914	ATP synthase subunit ATP5MPL, mitochondrial OS=Rattus norvegicus OX=10116 GN=Atp5mpl PE=1 SV=1
182	468	Q63704|CPT1B_RAT	23.85	1	1	15421000	1	1	1	N	88217	Carnitine O-palmitoyltransferase 1, muscle isoform OS=Rattus norvegicus OX=10116 GN=Cpt1b PE=1 SV=1
159	498	tr|Q5U2X8|Q5U2X8_RAT	23.71	2	2	11530000	1	1	1	N	50444	Acyl-CoA thioesterase 9 OS=Rattus norvegicus OX=10116 GN=Acot9 PE=1 SV=1
158	4725	Q63484|AKT3_RAT	23.15	2	2	260280	1	1	1	Y	55797	RAC-gamma serine/threonine-protein kinase OS=Rattus norvegicus OX=10116 GN=Akt3 PE=2 SV=2
149	396	P11530|DMD_RAT	23.14	0	0	2238800	1	1	1	N	425830	Dystrophin OS=Rattus norvegicus OX=10116 GN=Dmd PE=1 SV=2
160	4526	Q75Q39|TOM70_RAT	22.66	1	1	5719200	1	1	1	N	67445	Mitochondrial import receptor subunit TOM70 OS=Rattus norvegicus OX=10116 GN=Tomm70 PE=1 SV=1
160	4525	tr|R9PXR4|R9PXR4_RAT	22.66	1	1	5719200	1	1	1	N	61939	Mitochondrial import receptor subunit TOM70 OS=Rattus norvegicus OX=10116 GN=Tomm70 PE=1 SV=1
224	1037	tr|G3V6E8|G3V6E8_RAT	22.35	2	2	1139600	1	1	1	N	56439	Myocilin OS=Rattus norvegicus OX=10116 GN=Myoc PE=4 SV=1
224	1038	Q9R1J4|MYOC_RAT	22.35	2	2	1139600	1	1	1	N	56442	Myocilin OS=Rattus norvegicus OX=10116 GN=Myoc PE=2 SV=1
142	31545	Q5FVR2|TYPH_RAT	22.34	2	2	0	1	1	1	N	49901	Thymidine phosphorylase OS=Rattus norvegicus OX=10116 GN=Tymp PE=1 SV=1
124	4522	P02563|MYH6_RAT	21.88	1	1	0	1	1	1	N	223506	Myosin-6 OS=Rattus norvegicus OX=10116 GN=Myh6 PE=1 SV=2
226	8311	tr|Q6IEA8|Q6IEA8_RAT	21.87	8	8	1211800	1	1	1	Y	8528	Interferon, alpha-inducible protein 27-like 2B OS=Rattus norvegicus OX=10116 GN=Ifi27l2b PE=2 SV=1
228	438	tr|D4A7V6|D4A7V6_RAT	2020-02-21	1	1	4314800	1	1	1	N	219689	Caspase 8-associated protein 2 OS=Rattus norvegicus OX=10116 GN=Casp8ap2 PE=1 SV=1
129	447	Q2PQA9|KINH_RAT	20.82	1	1	187680	1	1	1	N	109531	Kinesin-1 heavy chain OS=Rattus norvegicus OX=10116 GN=Kif5b PE=1 SV=1
229	23466	Q5M7W1|TXNIP_RAT	20.75	2	2	867100	1	1	1	N	44018	Thioredoxin-interacting protein OS=Rattus norvegicus OX=10116 GN=Txnip PE=2 SV=1
126	1697	tr|A0A0G2QC41|A0A0G2QC41_RAT	20.53	1	1	27177000	1	1	1	N	125495	Histone deacetylase 6 OS=Rattus norvegicus OX=10116 GN=Hdac6 PE=1 SV=1
123	273	Q7TT47|SPG7_RAT	20.21	2	2	342020	1	1	1	N	86103	Paraplegin OS=Rattus norvegicus OX=10116 GN=Spg7 PE=2 SV=2
127	1506	tr|D4A1D3|D4A1D3_RAT	2020-07-20	0	0	3320600	1	1	1	Y	521487	Sacsin molecular chaperone OS=Rattus norvegicus OX=10116 GN=Sacs PE=1 SV=2
143	1291	tr|B1WC65|B1WC65_RAT	2020-04-20	1	1	672150	1	1	1	N	69836	HAUS augmin-like complex, subunit 3 OS=Rattus norvegicus OX=10116 GN=Haus3 PE=2 SV=1
