# Supplementary material for: Mitochondrial F-ATP Synthase Co-Migrating Proteins and Ca2+-Dependent Formation of Large Channels
Source: Cells. 2023 Oct 7;12(19):2414. doi: 10.3390/cells12192414 (PMC10572550; doi:10.3390/cells12192414)
Supplement: Supplementary file 1 [file cells-12-02414-s001.zip › Dataset S5.xlsx]

## Sheet: Dimer
Protein Group	Protein ID	Accession	-10lgP	Coverage (%)	Coverage (%) Sample 3	Area Sample 3	#Peptides	#Unique	#Spec Sample 3	PTM	Avg. Mass	Description
2	17	P10719|ATPB_RAT	398.18	64	64	657620000	183	180	407	Oxidation (M)		ATP synthase subunit beta, mitochondrial
2	18	tr|G3V6D3|G3V6D3_RAT	398.18	64	64	657620000	183	180	407	Oxidation (M)		ATP synthase subunit beta
1	20	P15999|ATPA_RAT	358.35	57	57	613900000	160	156	494	Carbamidomethylation		ATP synthase subunit alpha, mitochondrial
1	21	tr|F1LP05|F1LP05_RAT	358.35	57	57	613900000	160	156	494	Carbamidomethylation		ATP synthase subunit alpha
3	1	Q02253|MMSA_RAT	325.94	51	51	81132000	90	90	162	Carbamidomethylation		Methylmalonate-semialdehyde dehydrogenase [acylating], mitochondrial
3	2	tr|G3V7J0|G3V7J0_RAT	325.94	51	51	81132000	90	90	162	Carbamidomethylation		Aldehyde dehydrogenase family 6, subfamily A1, isoform CRA_b
4	8	P07756|CPSM_RAT	320.50	34	34	73977000	96	96	149	Oxidation (M)	164579	Carbamoyl-phosphate synthase [ammonia] mitochondrial OS=Rattus norvegicus OX=10116 GN=Cps1 PE=1 SV=1
10	280	P31399|ATP5H_RAT	309.21	71	71	68444000	49	49	82	Oxidation (M)	18763	ATP synthase subunit d mitochondrial OS=Rattus norvegicus OX=10116 GN=Atp5pd PE=1 SV=3
5	11	P67779|PHB_RAT	283.84	62	62	104200000	68	66	131		29820	Prohibitin OS=Rattus norvegicus OX=10116 GN=Phb PE=1 SV=1
7	35	P52873|PYC_RAT	282.20	29	29	34267000	66	65	110	Oxidation (M)	129777	Pyruvate carboxylase mitochondrial OS=Rattus norvegicus OX=10116 GN=Pc PE=1 SV=2
7	34	tr|A0A0G2JTL5|A0A0G2JTL5_RAT	282.20	27	27	34267000	66	65	110	Oxidation (M)	140005	Pyruvate carboxylase mitochondrial OS=Rattus norvegicus OX=10116 GN=Pc PE=1 SV=1
6	19	Q5XIH7|PHB2_RAT	272.00	61	61	79864000	67	64	129	Oxidation (M)	33312	Prohibitin-2 OS=Rattus norvegicus OX=10116 GN=Phb2 PE=1 SV=1
13	14	P10860|DHE3_RAT	263.23	37	37	21074000	44	44	61	Oxidation (M)	61416	Glutamate dehydrogenase 1 mitochondrial OS=Rattus norvegicus OX=10116 GN=Glud1 PE=1 SV=2
9	301	P35435|ATPG_RAT	259.98	40	40	74174000	35	35	84	Oxidation (M)	30191	ATP synthase subunit gamma mitochondrial OS=Rattus norvegicus OX=10116 GN=Atp5f1c PE=1 SV=2
9	297	tr|Q6QI09|Q6QI09_RAT	259.98	18	18	74174000	35	35	84	Oxidation (M)	67721	ATP synthase subunit gamma mitochondrial OS=Rattus norvegicus OX=10116 GN=Taf3 PE=1 SV=1
11	10	Q66HF1|NDUS1_RAT	253.84	21	21	32389000	42	42	67		79412	NADH-ubiquinone oxidoreductase 75 kDa subunit mitochondrial OS=Rattus norvegicus OX=10116 GN=Ndufs1 PE=1 SV=1
12	15	P00507|AATM_RAT	248.51	36	36	30717000	36	35	63	Oxidation (M)	47314	Aspartate aminotransferase mitochondrial OS=Rattus norvegicus OX=10116 GN=Got2 PE=1 SV=2
15	30	P19234|NDUV2_RAT	231.93	36	36	26646000	24	24	47		27378	NADH dehydrogenase [ubiquinone] flavoprotein 2 mitochondrial OS=Rattus norvegicus OX=10116 GN=Ndufv2 PE=1 SV=2
19	289	tr|D3ZFJ6|D3ZFJ6_RAT	231.44	25	25	10034000	21	21	31		60420	Lactamase beta OS=Rattus norvegicus OX=10116 GN=Lactb PE=1 SV=1
8	268	P19511|AT5F1_RAT	225.77	30	30	81333000	32	32	87		28869	ATP synthase F(0) complex subunit B1 mitochondrial OS=Rattus norvegicus OX=10116 GN=Atp5pb PE=1 SV=1
17	9	Q5BK63|NDUA9_RAT	223.35	36	36	8186200	28	25	41		42559	NADH dehydrogenase [ubiquinone] 1 alpha subcomplex subunit 9 mitochondrial OS=Rattus norvegicus OX=10116 GN=Ndufa9 PE=1 SV=2
16	26	Q641Y2|NDUS2_RAT	214.17	28	28	13080000	23	23	45	Oxidation (M)	52562	NADH dehydrogenase [ubiquinone] iron-sulfur protein 2 mitochondrial OS=Rattus norvegicus OX=10116 GN=Ndufs2 PE=1 SV=1
25	76	tr|Q68G44|Q68G44_RAT	201.57	25	25	7912400	20	20	24		56886	3-hydroxy-3-methylglutaryl coenzyme A synthase OS=Rattus norvegicus OX=10116 GN=Hmgcs2 PE=1 SV=1
37	29	P07895|SODM_RAT	196.80	27	27	7993800	9	9	16		24674	Superoxide dismutase [Mn] mitochondrial OS=Rattus norvegicus OX=10116 GN=Sod2 PE=1 SV=2
21	387	tr|G3V7Y3|G3V7Y3_RAT	194.19	36	36	2.1029E7	16	16	30	Oxidation (M)	17563	ATP synthase subunit delta mitochondrial OS=Rattus norvegicus OX=10116 GN=Atp5f1d PE=1 SV=1
23	33	Q64428|ECHA_RAT	192.46	15	15	7.333E6	21	21	26	Formylation	82665	Trifunctional enzyme subunit alpha mitochondrial OS=Rattus norvegicus OX=10116 GN=Hadha PE=1 SV=2
18	5937	Q6PDU7|ATP5L_RAT	190.11	39	39	2.7382E7	13	13	32	Oxidation (M)	11433	ATP synthase subunit g mitochondrial OS=Rattus norvegicus OX=10116 GN=Atp5mg PE=1 SV=2
14	5938	Q06647|ATPO_RAT	188.95	56	56	2.5753E7	30	30	51	Carbamidomethylation		ATP synthase subunit O, mitochondrial
45	45	tr|B2RYS8|B2RYS8_RAT	188.09	25	25	3.7714E6	8	8	12		21959	NADH dehydrogenase [ubiquinone] 1 beta subcomplex subunit 8 mitochondrial OS=Rattus norvegicus OX=10116 GN=Ndufb8 PE=1 SV=1
24	164	tr|D3ZF13|D3ZF13_RAT	184.14	23	23	1.0259E7	13	13	25	Oxidation (M)	17514	Acyl carrier protein OS=Rattus norvegicus OX=10116 GN=Ndufab1 PE=1 SV=1
35	228	P16970|ABCD3_RAT	175.41	13	13	1.2428E7	14	14	17		75316	ATP-binding cassette sub-family D member 3 OS=Rattus norvegicus OX=10116 GN=Abcd3 PE=1 SV=3
39	183	tr|D4A7L4|D4A7L4_RAT	174.56	32	32	6.2574E6	9	9	14		17634	NADH dehydrogenase (Ubiquinone) 1 beta subcomplex 11 (Predicted) OS=Rattus norvegicus OX=10116 GN=Ndufb11 PE=1 SV=1
28	36	tr|Q06QK5|Q06QK5_RAT	173.28	14	14	6.3817E6	15	15	21		68606	NADH-ubiquinone oxidoreductase chain 5 OS=Rattus norvegicus OX=10116 GN=ND5 PE=3 SV=1
28	37	P11661|NU5M_RAT	173.28	14	14	6.3817E6	15	15	21		68618	NADH-ubiquinone oxidoreductase chain 5 OS=Rattus norvegicus OX=10116 GN=Mtnd5 PE=3 SV=3
28	38	tr|Q06QA1|Q06QA1_RAT	173.28	14	14	6.3817E6	15	15	21		68574	NADH-ubiquinone oxidoreductase chain 5 OS=Rattus norvegicus OX=10116 GN=ND5 PE=3 SV=1
28	39	tr|Q8SEZ0|Q8SEZ0_RAT	173.28	14	14	6.3817E6	15	15	21		68618	NADH-ubiquinone oxidoreductase chain 5 OS=Rattus norvegicus OX=10116 GN=Mt-nd5 PE=3 SV=1
28	40	tr|A0A096XKT9|A0A096XKT9_RAT	173.28	14	14	6.3817E6	15	15	21		68584	NADH-ubiquinone oxidoreductase chain 5 OS=Rattus norvegicus OX=10116 GN=ND5 PE=3 SV=1
26	12	Q68FY0|QCR1_RAT	173.08	15	15	6.3117E6	12	12	22		52849	Cytochrome b-c1 complex subunit 1 mitochondrial OS=Rattus norvegicus OX=10116 GN=Uqcrc1 PE=1 SV=1
31	169	Q60587|ECHB_RAT	171.47	18	18	4.9076E6	15	15	19		51414	Trifunctional enzyme subunit beta mitochondrial OS=Rattus norvegicus OX=10116 GN=Hadhb PE=1 SV=1
30	13	P32551|QCR2_RAT	168.74	15	15	8.2061E6	13	13	20		48396	Cytochrome b-c1 complex subunit 2 mitochondrial OS=Rattus norvegicus OX=10116 GN=Uqcrc2 PE=1 SV=2
47	246	tr|Q5PQZ9|Q5PQZ9_RAT	167.44	27	27	1.0909E7	7	7	12		14359	NADH dehydrogenase [ubiquinone] 1 subunit C2 OS=Rattus norvegicus OX=10116 GN=Ndufc2 PE=1 SV=1
20	24	tr|D3ZG43|D3ZG43_RAT	165.05	34	34	9.9423E6	20	20	30		30226	NADH dehydrogenase (Ubiquinone) Fe-S protein 3 (Predicted) isoform CRA_c OS=Rattus norvegicus OX=10116 GN=Ndufs3 PE=1 SV=1
59	22	tr|D3ZFQ8|D3ZFQ8_RAT	159.23	9	9	4.8892E6	5	5	8		35435	Cytochrome c-1 OS=Rattus norvegicus OX=10116 GN=Cyc1 PE=1 SV=3
43	416	tr|Q5UAJ5|Q5UAJ5_RAT	156.33	48	48	1.482E7	7	7	13	Oxidation (M)	7642	ATP synthase protein 8 OS=Rattus norvegicus OX=10116 GN=ATP8 PE=3 SV=1
43	418	tr|Q8SEZ4|Q8SEZ4_RAT	156.33	48	48	1.482E7	7	7	13	Oxidation (M)	7632	ATP synthase protein 8 OS=Rattus norvegicus OX=10116 GN=ATPase8 PE=3 SV=1
33	42	tr|D4A0T0|D4A0T0_RAT	155.37	35	35	5.5919E6	12	12	19		20859	NADH:ubiquinone oxidoreductase subunit B10 OS=Rattus norvegicus OX=10116 GN=Ndufb10 PE=1 SV=1
60	261	P24329|THTR_RAT	154.41	10	10	1.6588E6	5	5	8		33407	Thiosulfate sulfurtransferase OS=Rattus norvegicus OX=10116 GN=Tst PE=1 SV=3
51	165	tr|D4A565|D4A565_RAT	153.90	24	24	1.7247E6	6	6	10		21664	NADH dehydrogenase (Ubiquinone) 1 beta subcomplex 5 (Predicted) isoform CRA_b OS=Rattus norvegicus OX=10116 GN=Ndufb5 PE=1 SV=1
38	266	P04762|CATA_RAT	152.68	13	13	3.0877E6	11	11	15		59757	Catalase OS=Rattus norvegicus OX=10116 GN=Cat PE=1 SV=3
42	135	tr|B0BNE6|B0BNE6_RAT	152.14	20	20	3.3957E6	13	11	13		23970	NADH dehydrogenase (Ubiquinone) Fe-S protein 8 (Predicted) isoform CRA_a OS=Rattus norvegicus OX=10116 GN=Ndufs8 PE=1 SV=1
40	242	Q80W89|NDUAB_RAT	150.70	21	21	6.2084E6	9	9	14		14854	NADH dehydrogenase [ubiquinone] 1 alpha subcomplex subunit 11 OS=Rattus norvegicus OX=10116 GN=Ndufa11 PE=2 SV=1
62	1939	tr|D4ACE9|D4ACE9_RAT	146.87	7	7	2.0224E6	6	6	7		103115	Alpha-aminoadipic semialdehyde synthase mitochondrial OS=Rattus norvegicus OX=10116 GN=Aass PE=1 SV=3
62	1940	A2VCW9|AASS_RAT	146.87	7	7	2.0224E6	6	6	7		102908	Alpha-aminoadipic semialdehyde synthase mitochondrial OS=Rattus norvegicus OX=10116 GN=Aass PE=2 SV=1
34	100	P17764|THIL_RAT	144.23	21	21	6.2144E6	13	13	18		44695	Acetyl-CoA acetyltransferase mitochondrial OS=Rattus norvegicus OX=10116 GN=Acat1 PE=1 SV=1
29	23	tr|Q5XIH3|Q5XIH3_RAT	140.68	14	14	1.2894E7	10	10	21		50731	NADH dehydrogenase [ubiquinone] flavoprotein 1 mitochondrial OS=Rattus norvegicus OX=10116 GN=Ndufv1 PE=1 SV=1
27	138	P05508|NU4M_RAT	139.23	15	15	3.1924E6	13	12	21	Oxidation (M)		NADH-ubiquinone oxidoreductase chain 4
27	141	tr|Q06QA2|Q06QA2_RAT	139.23	15	15	3.1924E6	13	12	21	Oxidation (M)
27	142	tr|Q7HKW3|Q7HKW3_RAT	139.23	15	15	3.1924E6	13	12	21	Oxidation (M)		NADH-ubiquinone oxidoreductase chain 4
27	143	tr|Q06Q89|Q06Q89_RAT	139.23	15	15	3.1924E6	13	12	21	Oxidation (M)
27	145	tr|Q8HIC6|Q8HIC6_RAT	139.23	15	15	3.1924E6	13	12	21	Oxidation (M)		NADH-ubiquinone oxidoreductase chain 4
27	151	tr|A7XYB9|A7XYB9_RAT	139.23	15	15	3.1924E6	13	12	21	Oxidation (M)
27	152	tr|Q06QG7|Q06QG7_RAT	139.23	15	15	3.1924E6	13	12	21	Oxidation (M)
27	144	tr|Q35737|Q35737_RAT	139.23	15	15	3.1924E6	13	12	21	Oxidation (M)		NADH-ubiquinone oxidoreductase chain 4
27	139	tr|D2E6K0|D2E6K0_RAT	139.23	15	15	3.1924E6	13	12	21	Oxidation (M)
27	140	tr|Q06QE1|Q06QE1_RAT	139.23	15	15	3.1924E6	13	12	21	Oxidation (M)
52	179	P11240|COX5A_RAT	136.75	33	33	5.2151E6	6	6	10		16130	Cytochrome c oxidase subunit 5A mitochondrial OS=Rattus norvegicus OX=10116 GN=Cox5a PE=1 SV=1
41	81	tr|S5RZM8|S5RZM8_RAT	135.94	26	26	3.3919E6	9	9	13	Oxidation (M)	25958	Cytochrome c oxidase subunit 2 OS=Rattus norvegicus OX=10116 GN=COX2 PE=3 SV=1
41	82	P00406|COX2_RAT	135.94	26	26	3.3919E6	9	9	13	Oxidation (M)	25928	Cytochrome c oxidase subunit 2 OS=Rattus norvegicus OX=10116 GN=Mtco2 PE=1 SV=3
41	41	tr|Q5UAJ6|Q5UAJ6_RAT	135.94	26	26	3.3919E6	9	9	13	Oxidation (M)	25942	Cytochrome c oxidase subunit 2 OS=Rattus norvegicus OX=10116 GN=COX2 PE=3 SV=1
41	83	tr|Q8SEZ5|Q8SEZ5_RAT	135.94	26	26	3.3919E6	9	9	13	Oxidation (M)	25928	Cytochrome c oxidase subunit 2 OS=Rattus norvegicus OX=10116 GN=Mt-co2 PE=1 SV=1
41	84	tr|A0A097PE04|A0A097PE04_RAT	135.94	26	26	3.3919E6	9	9	13	Oxidation (M)	25894	Cytochrome c oxidase subunit 2 OS=Rattus norvegicus OX=10116 GN=COX2 PE=3 SV=1
46	176	P13086|SUCA_RAT	134.04	14	14	3.3719E6	8	8	12		36148	Succinate--CoA ligase [ADP/GDP-forming] subunit alpha mitochondrial OS=Rattus norvegicus OX=10116 GN=Suclg1 PE=2 SV=2
46	177	tr|A0A0H2UHE1|A0A0H2UHE1_RAT	134.04	14	14	3.3719E6	8	8	12		37560	Succinate--CoA ligase [ADP/GDP-forming] subunit alpha mitochondrial OS=Rattus norvegicus OX=10116 GN=Suclg1 PE=1 SV=1
64	133	tr|F1LPG5|F1LPG5_RAT	132.26	19	19	2.1435E6	4	4	7		15064	NADH:ubiquinone oxidoreductase subunit B4 OS=Rattus norvegicus OX=10116 GN=Ndufb4 PE=1 SV=1
53	154	tr|Q06QK0|Q06QK0_RAT	126.29	11	11	1.7259E6	6	6	9	Oxidation (M)
53	155	tr|Q8SEZ6|Q8SEZ6_RAT	126.29	11	11	1.7259E6	6	6	9	Oxidation (M)
53	156	tr|A0A0A1FZ34|A0A0A1FZ34_RAT	126.29	11	11	1.7259E6	6	6	9	Oxidation (M)
53	157	tr|Q8HIC9|Q8HIC9_RAT	126.29	11	11	1.7259E6	6	6	9	Oxidation (M)		Cytochrome c oxidase subunit 1
53	158	P05503|COX1_RAT	126.29	11	11	1.7259E6	6	6	9	Oxidation (M)		Cytochrome c oxidase subunit 1
53	159	tr|Q95938|Q95938_RAT	126.29	11	11	1.7259E6	6	6	9	Oxidation (M)		Cytochrome c oxidase subunit 1
44	110	tr|A0A0G2JVL6|A0A0G2JVL6_RAT	125.01	19	19	3.8662E6	6	6	13		19965	NADH dehydrogenase [ubiquinone] 1 alpha subcomplex subunit 8 OS=Rattus norvegicus OX=10116 GN=Ndufa8 PE=1 SV=1
57	175	tr|D3ZCZ9|D3ZCZ9_RAT	124.09	21	21	2.1504E6	5	5	8		13040	NADH dehydrogenase [ubiquinone] iron-sulfur protein 6 mitochondrial OS=Rattus norvegicus OX=10116 GN=LOC100912599 PE=1 SV=1
22	5942	P05504|ATP6_RAT	122.12	32	32	9.3815E6	13	13	29	Oxidation (M)		ATP synthase subunit a
22	5943	tr|Q8HIC7|Q8HIC7_RAT	122.12	32	32	9.3815E6	13	13	29	Oxidation (M)		ATP synthase subunit a
22	5944	tr|S5S1E9|S5S1E9_RAT	122.12	32	32	9.3815E6	13	13	29	Oxidation (M)
80	814	P45953|ACADV_RAT	116.80	3	3	8.2097E5	4	4	4		70749	Very long-chain specific acyl-CoA dehydrogenase mitochondrial OS=Rattus norvegicus OX=10116 GN=Acadvl PE=1 SV=1
80	815	tr|Q5M9H2|Q5M9H2_RAT	116.80	3	3	8.2097E5	4	4	4		70821	Acyl-Coenzyme A dehydrogenase very long chain OS=Rattus norvegicus OX=10116 GN=Acadvl PE=1 SV=1
36	28	Q561S0|NDUAA_RAT	115.14	17	17	1.8575E6	11	3	17	Oxidation (M)	40493	NADH dehydrogenase [ubiquinone] 1 alpha subcomplex subunit 10 mitochondrial OS=Rattus norvegicus OX=10116 GN=Ndufa10 PE=1 SV=1
66	291	tr|Q5XFW4|Q5XFW4_RAT	114.39	10	10	3.9767E5	5	5	7		20541	Mitochondrial ribosomal protein L13 OS=Rattus norvegicus OX=10116 GN=Mrpl13 PE=1 SV=1
70	168	tr|F1LXA0|F1LXA0_RAT	113.54	21	21	1.6995E6	4	4	6		17178	NADH dehydrogenase [ubiquinone] 1 alpha subcomplex subunit 12 OS=Rattus norvegicus OX=10116 GN=Ndufa12 PE=1 SV=2
65	198	P85834|EFTU_RAT	113.46	10	10	9.1198E5	5	5	7		49522	Elongation factor Tu mitochondrial OS=Rattus norvegicus OX=10116 GN=Tufm PE=1 SV=1
55	111	Q5XIF3|NDUS4_RAT	112.51	12	12	3.5964E6	5	5	8		19741	NADH dehydrogenase [ubiquinone] iron-sulfur protein 4 mitochondrial OS=Rattus norvegicus OX=10116 GN=Ndufs4 PE=1 SV=1
67	218	tr|M0RAM5|M0RAM5_RAT	112.27	18	18	1.2065E6	5	5	6		22155	Glutathione peroxidase OS=Rattus norvegicus OX=10116 GN=Gpx1 PE=1 SV=1
67	219	P04041|GPX1_RAT	112.27	18	18	1.2065E6	5	5	6		22305	Glutathione peroxidase 1 OS=Rattus norvegicus OX=10116 GN=Gpx1 PE=1 SV=4
68	44	tr|D6NSR7|D6NSR7_RAT	107.30	14	14	1.2547E6	5	5	6		42982	Cytochrome b (Fragment) OS=Rattus norvegicus OX=10116 GN=cytb PE=3 SV=1
68	113	tr|A0A411P2I9|A0A411P2I9_RAT	107.30	15	15	1.2547E6	5	5	6		40144	Cytochrome b (Fragment) OS=Rattus norvegicus OX=10116 GN=Cytb PE=3 SV=1
68	114	tr|A0A0U2IDR8|A0A0U2IDR8_RAT	107.30	15	15	1.2547E6	5	5	6		40981	Cytochrome b (Fragment) OS=Rattus norvegicus OX=10116 PE=3 SV=1
68	115	tr|A0A0U2M179|A0A0U2M179_RAT	107.30	15	15	1.2547E6	5	5	6		41037	Cytochrome b (Fragment) OS=Rattus norvegicus OX=10116 PE=3 SV=1
68	116	tr|A0A411P2L0|A0A411P2L0_RAT	107.30	15	15	1.2547E6	5	5	6		41017	Cytochrome b (Fragment) OS=Rattus norvegicus OX=10116 GN=Cytb PE=3 SV=1
68	90	tr|F8QU31|F8QU31_RAT	107.30	14	14	1.2547E6	5	5	6		42181	Cytochrome b (Fragment) OS=Rattus norvegicus OX=10116 GN=cytb PE=3 SV=1
68	91	tr|A0A411P2K0|A0A411P2K0_RAT	107.30	14	14	1.2547E6	5	5	6		42238	Cytochrome b (Fragment) OS=Rattus norvegicus OX=10116 GN=Cytb PE=3 SV=1
68	46	tr|L0L4L8|L0L4L8_RAT	107.30	14	14	1.2547E6	5	5	6		42470	Cytochrome b (Fragment) OS=Rattus norvegicus OX=10116 GN=cytb PE=3 SV=1
68	47	tr|A0A140GE10|A0A140GE10_RAT	107.30	14	14	1.2547E6	5	5	6		42574	Cytochrome b (Fragment) OS=Rattus norvegicus OX=10116 PE=3 SV=1
68	48	tr|A0A140GE11|A0A140GE11_RAT	107.30	14	14	1.2547E6	5	5	6		42588	Cytochrome b (Fragment) OS=Rattus norvegicus OX=10116 PE=3 SV=1
68	78	tr|A0A140GE08|A0A140GE08_RAT	107.30	14	14	1.2547E6	5	5	6		42527	Cytochrome b (Fragment) OS=Rattus norvegicus OX=10116 PE=3 SV=1
68	92	tr|A0A385HCC9|A0A385HCC9_RAT	107.30	14	14	1.2547E6	5	5	6		42766	Cytochrome b (Fragment) OS=Rattus norvegicus OX=10116 PE=3 SV=1
68	49	tr|A0A3Q8AGE8|A0A3Q8AGE8_RAT	107.30	14	14	1.2547E6	5	5	6		42712	Cytochrome b (Fragment) OS=Rattus norvegicus OX=10116 GN=Cytb PE=3 SV=1
68	50	tr|A0A3Q8AC68|A0A3Q8AC68_RAT	107.30	14	14	1.2547E6	5	5	6		42622	Cytochrome b (Fragment) OS=Rattus norvegicus OX=10116 GN=Cytb PE=3 SV=1
68	51	tr|A0A3S6FM15|A0A3S6FM15_RAT	107.30	14	14	1.2547E6	5	5	6		42698	Cytochrome b (Fragment) OS=Rattus norvegicus OX=10116 GN=Cytb PE=3 SV=1
68	85	tr|A0A097PE40|A0A097PE40_RAT	107.30	14	14	1.2547E6	5	5	6		42865	Cytochrome b OS=Rattus norvegicus OX=10116 GN=CYTB PE=3 SV=1
68	52	tr|A0A220D9Z6|A0A220D9Z6_RAT	107.30	14	14	1.2547E6	5	5	6		43018	Cytochrome b OS=Rattus norvegicus OX=10116 PE=3 SV=1
68	99	tr|D6NSP2|D6NSP2_RAT	107.30	14	14	1.2547E6	5	5	6		42945	Cytochrome b (Fragment) OS=Rattus norvegicus OX=10116 GN=cytb PE=3 SV=1
68	53	tr|D6NSS6|D6NSS6_RAT	107.30	14	14	1.2547E6	5	5	6		42993	Cytochrome b (Fragment) OS=Rattus norvegicus OX=10116 GN=cytb PE=3 SV=1
68	86	tr|D6NSQ3|D6NSQ3_RAT	107.30	14	14	1.2547E6	5	5	6		43012	Cytochrome b (Fragment) OS=Rattus norvegicus OX=10116 GN=cytb PE=3 SV=1
68	54	tr|D6NSR3|D6NSR3_RAT	107.30	14	14	1.2547E6	5	5	6		42986	Cytochrome b (Fragment) OS=Rattus norvegicus OX=10116 GN=cytb PE=3 SV=1
68	93	tr|D6NSP4|D6NSP4_RAT	107.30	14	14	1.2547E6	5	5	6		43016	Cytochrome b (Fragment) OS=Rattus norvegicus OX=10116 GN=cytb PE=3 SV=1
68	55	tr|D6NSR8|D6NSR8_RAT	107.30	14	14	1.2547E6	5	5	6		42998	Cytochrome b (Fragment) OS=Rattus norvegicus OX=10116 GN=cytb PE=3 SV=1
68	56	tr|A0A0A1FZ42|A0A0A1FZ42_RAT	107.30	14	14	1.2547E6	5	5	6		42989	Cytochrome b OS=Rattus norvegicus OX=10116 GN=CYTB PE=3 SV=1
68	57	tr|D6NSS7|D6NSS7_RAT	107.30	14	14	1.2547E6	5	5	6		42948	Cytochrome b (Fragment) OS=Rattus norvegicus OX=10116 GN=cytb PE=3 SV=1
68	58	tr|Q8SEY9|Q8SEY9_RAT	107.30	14	14	1.2547E6	5	5	6		43015	Cytochrome b OS=Rattus norvegicus OX=10116 GN=cytb PE=3 SV=1
68	59	tr|A0A220DA44|A0A220DA44_RAT	107.30	14	14	1.2547E6	5	5	6		42968	Cytochrome b OS=Rattus norvegicus OX=10116 PE=3 SV=1
68	79	tr|F2Q6S5|F2Q6S5_RAT	107.30	14	14	1.2547E6	5	5	6		42952	Cytochrome b (Fragment) OS=Rattus norvegicus OX=10116 GN=cytb PE=3 SV=1
68	60	tr|D6NSQ0|D6NSQ0_RAT	107.30	14	14	1.2547E6	5	5	6		42968	Cytochrome b (Fragment) OS=Rattus norvegicus OX=10116 GN=cytb PE=3 SV=1
68	61	tr|Q5UAI7|Q5UAI7_RAT	107.30	14	14	1.2547E6	5	5	6		42998	Cytochrome b OS=Rattus norvegicus OX=10116 GN=CYTB PE=3 SV=1
68	94	tr|D6NSR2|D6NSR2_RAT	107.30	14	14	1.2547E6	5	5	6		43073	Cytochrome b (Fragment) OS=Rattus norvegicus OX=10116 GN=cytb PE=3 SV=1
68	87	tr|A0A0S1Z1V9|A0A0S1Z1V9_RAT	107.30	14	14	1.2547E6	5	5	6		43002	Cytochrome b OS=Rattus norvegicus OX=10116 GN=CYTB PE=3 SV=1
68	95	tr|D6NSR1|D6NSR1_RAT	107.30	14	14	1.2547E6	5	5	6		43002	Cytochrome b (Fragment) OS=Rattus norvegicus OX=10116 GN=cytb PE=3 SV=1
68	62	tr|Q8HIC4|Q8HIC4_RAT	107.30	14	14	1.2547E6	5	5	6		43012	Cytochrome b OS=Rattus norvegicus OX=10116 GN=Mt-cyb PE=3 SV=1
68	63	tr|A0A220DA02|A0A220DA02_RAT	107.30	14	14	1.2547E6	5	5	6		42968	Cytochrome b OS=Rattus norvegicus OX=10116 PE=3 SV=1
68	64	tr|A0A0S1Z1V4|A0A0S1Z1V4_RAT	107.30	14	14	1.2547E6	5	5	6		43016	Cytochrome b OS=Rattus norvegicus OX=10116 GN=CYTB PE=3 SV=1
68	88	tr|R9TKN1|R9TKN1_RAT	107.30	14	14	1.2547E6	5	5	6		43012	Cytochrome b OS=Rattus norvegicus OX=10116 GN=CYTB PE=3 SV=1
68	65	P00159|CYB_RAT	107.30	14	14	1.2547E6	5	5	6		43012	Cytochrome b OS=Rattus norvegicus OX=10116 GN=Mt-Cyb PE=3 SV=3
68	66	tr|L0N311|L0N311_RAT	107.30	14	14	1.2547E6	5	5	6		43045	Cytochrome b (Fragment) OS=Rattus norvegicus OX=10116 GN=cytb PE=3 SV=1
68	67	tr|A0A220DA28|A0A220DA28_RAT	107.30	14	14	1.2547E6	5	5	6		42970	Cytochrome b OS=Rattus norvegicus OX=10116 PE=3 SV=1
68	68	tr|H2KXA0|H2KXA0_RAT	107.30	14	14	1.2547E6	5	5	6		42978	Cytochrome b (Fragment) OS=Rattus norvegicus OX=10116 GN=cytb PE=3 SV=1
68	101	tr|A0A096XNM4|A0A096XNM4_RAT	107.30	14	14	1.2547E6	5	5	6		43042	Cytochrome b (Fragment) OS=Rattus norvegicus OX=10116 PE=3 SV=1
68	89	tr|D6NSP5|D6NSP5_RAT	107.30	14	14	1.2547E6	5	5	6		43012	Cytochrome b (Fragment) OS=Rattus norvegicus OX=10116 GN=cytb PE=3 SV=1
125	667	tr|B2RZ24|B2RZ24_RAT	106.95	5	5	3.3814E5	2	2	2		47388	Succinate-CoA ligase subunit beta (Fragment) OS=Rattus norvegicus OX=10116 GN=Sucla2 PE=2 SV=1
125	668	tr|F1LM47|F1LM47_RAT	106.95	5	5	3.3814E5	2	2	2		50306	Succinate--CoA ligase [ADP-forming] subunit beta mitochondrial OS=Rattus norvegicus OX=10116 GN=Sucla2 PE=1 SV=1
71	1219	tr|D3ZGM1|D3ZGM1_RAT	106.77	6	6	7.3668E5	5	5	5		77891	Pentatricopeptide repeat domain 3 OS=Rattus norvegicus OX=10116 GN=Ptcd3 PE=1 SV=1
71	1220	tr|A0A0G2JU15|A0A0G2JU15_RAT	106.77	6	6	7.3668E5	5	5	5		84557	Pentatricopeptide repeat domain 3 OS=Rattus norvegicus OX=10116 GN=Ptcd3 PE=1 SV=1
72	80	P20788|UCRI_RAT	104.55	11	11	1.8463E6	3	3	5		29446	Cytochrome b-c1 complex subunit Rieske mitochondrial OS=Rattus norvegicus OX=10116 GN=Uqcrfs1 PE=1 SV=2
56	244	P07824|ARGI1_RAT	104.16	13	13	2.3213E6	5	5	8		34973	Arginase-1 OS=Rattus norvegicus OX=10116 GN=Arg1 PE=1 SV=2
89	196	Q63362|NDUA5_RAT	102.41	18	18	2.1437E6	4	4	4		13412	NADH dehydrogenase [ubiquinone] 1 alpha subcomplex subunit 5 OS=Rattus norvegicus OX=10116 GN=Ndufa5 PE=1 SV=3
49	31	tr|A0A1W2Q6F8|A0A1W2Q6F8_RAT	102.30	16	16	4.4632E5	9	1	11	Oxidation (M)	40544	NADH dehydrogenase [ubiquinone] 1 alpha subcomplex subunit 10 mitochondrial OS=Rattus norvegicus OX=10116 GN=Ndufa10l1 PE=3 SV=1
81	112	tr|D4A3V2|D4A3V2_RAT	101.94	28	28	7.894E5	4	4	4		15224	NADH dehydrogenase [ubiquinone] 1 alpha subcomplex subunit 6 OS=Rattus norvegicus OX=10116 GN=Ndufa6 PE=1 SV=1
102	332	Q9ER34|ACON_RAT	100.95	6	6	5.3443E5	3	3	3		85433	Aconitate hydratase mitochondrial OS=Rattus norvegicus OX=10116 GN=Aco2 PE=1 SV=2
54	245	P18163|ACSL1_RAT	96.91	8	8	1.3122E6	7	7	9		78179	Long-chain-fatty-acid--CoA ligase 1 OS=Rattus norvegicus OX=10116 GN=Acsl1 PE=1 SV=1
63	5947	Q924S5|LONM_RAT	96.84	3	3	1.1877E6	4	4	7		105792	Lon protease homolog mitochondrial OS=Rattus norvegicus OX=10116 GN=Lonp1 PE=2 SV=1
100	348	P09139|SPYA_RAT	83.80	9	9	3.0747E5	3	3	3		45834	Serine--pyruvate aminotransferase mitochondrial OS=Rattus norvegicus OX=10116 GN=Agxt PE=1 SV=1
48	250	tr|Q06Q97|Q06Q97_RAT	83.44	12	12	1.3901E6	6	6	11		38485	NADH-ubiquinone oxidoreductase chain 2 OS=Rattus norvegicus OX=10116 GN=ND2 PE=3 SV=1
48	251	tr|A0A0A1G491|A0A0A1G491_RAT	83.44	12	12	1.3901E6	6	6	11		38542	NADH-ubiquinone oxidoreductase chain 2 OS=Rattus norvegicus OX=10116 GN=ND2 PE=3 SV=1
48	252	tr|Q5UAJ8|Q5UAJ8_RAT	83.44	12	12	1.3901E6	6	6	11		38455	NADH-ubiquinone oxidoreductase chain 2 OS=Rattus norvegicus OX=10116 GN=ND2 PE=3 SV=1
48	255	tr|Q06QH5|Q06QH5_RAT	83.44	12	12	1.3901E6	6	6	11		38626	NADH-ubiquinone oxidoreductase chain 2 OS=Rattus norvegicus OX=10116 GN=ND2 PE=3 SV=1
48	256	tr|Q06QB0|Q06QB0_RAT	83.44	12	12	1.3901E6	6	6	11		38534	NADH-ubiquinone oxidoreductase chain 2 OS=Rattus norvegicus OX=10116 GN=ND2 PE=3 SV=1
48	257	tr|D2E6P4|D2E6P4_RAT	83.44	12	12	1.3901E6	6	6	11		38623	NADH-ubiquinone oxidoreductase chain 2 OS=Rattus norvegicus OX=10116 GN=ND2 PE=3 SV=1
48	249	tr|Q06QE9|Q06QE9_RAT	83.44	12	12	1.3901E6	6	6	11		38598	NADH-ubiquinone oxidoreductase chain 2 OS=Rattus norvegicus OX=10116 GN=ND2 PE=3 SV=1
48	253	tr|Q8HID0|Q8HID0_RAT	83.44	12	12	1.3901E6	6	6	11		38653	NADH-ubiquinone oxidoreductase chain 2 OS=Rattus norvegicus OX=10116 GN=Mt-nd2 PE=3 SV=1
48	254	P11662|NU2M_RAT	83.44	12	12	1.3901E6	6	6	11		38653	NADH-ubiquinone oxidoreductase chain 2 OS=Rattus norvegicus OX=10116 GN=Mtnd2 PE=3 SV=3
48	258	tr|Q8SEZ7|Q8SEZ7_RAT	83.44	12	12	1.3901E6	6	6	11		38580	NADH-ubiquinone oxidoreductase chain 2 (Fragment) OS=Rattus norvegicus OX=10116 GN=NADH2 PE=3 SV=1
151	283	P80431|COX7B_RAT	82.69	29	29	6.8926E5	2	2	2		8995	Cytochrome c oxidase subunit 7B mitochondrial OS=Rattus norvegicus OX=10116 GN=Cox7b PE=1 SV=3
58	231	tr|Q5M949|Q5M949_RAT	80.79	14	14	2.2508E6	6	6	8		28340	Nipsnap homolog 3A (C. elegans) OS=Rattus norvegicus OX=10116 GN=Nipsnap3b PE=1 SV=1
61	11914	P29419|ATP5I_RAT	79.60	27	27	3.0402E6	3	3	8		8255	ATP synthase subunit e mitochondrial OS=Rattus norvegicus OX=10116 GN=Atp5me PE=1 SV=3
77	346	Q63750|RM23_RAT	79.17	19	19	5.4653E5	3	3	5		17050	39S ribosomal protein L23 mitochondrial OS=Rattus norvegicus OX=10116 GN=Mrpl23 PE=2 SV=1
78	178	tr|D3ZZ21|D3ZZ21_RAT	77.40	12	12	7.0255E5	3	3	5		15638	NADH dehydrogenase (Ubiquinone) 1 beta subcomplex 6 (Predicted) OS=Rattus norvegicus OX=10116 GN=Ndufb6 PE=1 SV=1
50	171	tr|Q8SEZ8|Q8SEZ8_RAT	77.13	18	18	1.7499E6	8	8	11	Oxidation (M)	36133	NADH-ubiquinone oxidoreductase chain 1 (Fragment) OS=Rattus norvegicus OX=10116 GN=NADH1 PE=3 SV=1
50	172	P03889|NU1M_RAT	77.13	18	18	1.7499E6	8	8	11	Oxidation (M)	36145	NADH-ubiquinone oxidoreductase chain 1 OS=Rattus norvegicus OX=10116 GN=Mtnd1 PE=1 SV=3
50	173	tr|Q8HID1|Q8HID1_RAT	77.13	18	18	1.7499E6	8	8	11	Oxidation (M)	36145	NADH-ubiquinone oxidoreductase chain 1 OS=Rattus norvegicus OX=10116 GN=Mt-nd1 PE=3 SV=1
50	174	tr|D2E6L7|D2E6L7_RAT	77.13	18	18	1.7499E6	8	8	11	Oxidation (M)	36062	NADH-ubiquinone oxidoreductase chain 1 OS=Rattus norvegicus OX=10116 GN=ND1 PE=3 SV=1
74	182	P10888|COX41_RAT	74.44	17	17	1.1557E6	4	4	5		19515	Cytochrome c oxidase subunit 4 isoform 1 mitochondrial OS=Rattus norvegicus OX=10116 GN=Cox4i1 PE=1 SV=1
75	194	Q9R063|PRDX5_RAT	73.85	17	17	1.5202E6	4	4	5		22179	Peroxiredoxin-5 mitochondrial OS=Rattus norvegicus OX=10116 GN=Prdx5 PE=1 SV=1
75	195	tr|A0A0G2JSS8|A0A0G2JSS8_RAT	73.85	17	17	1.5202E6	4	4	5		22207	Peroxiredoxin OS=Rattus norvegicus OX=10116 GN=Prdx5 PE=1 SV=1
105	264	P02770|ALBU_RAT	72.98	3	3	6.0016E5	3	3	3	Formylation	68731	Serum albumin OS=Rattus norvegicus OX=10116 GN=Alb PE=1 SV=2
105	263	tr|A0A0G2JSH5|A0A0G2JSH5_RAT	72.98	3	3	6.0016E5	3	3	3	Formylation	68759	Serum albumin OS=Rattus norvegicus OX=10116 GN=Alb PE=1 SV=1
69	148	tr|Q5RJN0|Q5RJN0_RAT	72.84	14	14	1.5232E6	4	4	6	Oxidation (M)	23945	NADH dehydrogenase (Ubiquinone) Fe-S protein 7 OS=Rattus norvegicus OX=10116 GN=Ndufs7 PE=1 SV=1
91	290	tr|Q4G067|Q4G067_RAT	68.98	8	8	1.0023E6	3	3	4		37440	Mitochondrial ribosomal protein L44 OS=Rattus norvegicus OX=10116 GN=Mrpl44 PE=1 SV=1
108	1292	tr|G3V6I4|G3V6I4_RAT	68.42	5	5	3.3735E5	2	2	3		37791	Mitochondrial amidoxime reducing component 1 OS=Rattus norvegicus OX=10116 GN=Marc1 PE=1 SV=1
82	3	tr|B2GV15|B2GV15_RAT	67.54	4	4	5.5589E5	2	2	4		53274	Dihydrolipoamide acetyltransferase component of pyruvate dehydrogenase complex OS=Rattus norvegicus OX=10116 GN=Dbt PE=1 SV=1
106	11911	P21571|ATP5J_RAT	63.45	19	19	8.4415E5	2	2	3		12494	ATP synthase-coupling factor 6 mitochondrial OS=Rattus norvegicus OX=10116 GN=Atp5pf PE=1 SV=1
88	232	tr|M0R6J0|M0R6J0_RAT	61.62	6	6	4.5281E5	2	2	4		38374	Mitochondrial ribosomal protein L39 OS=Rattus norvegicus OX=10116 GN=Mrpl39 PE=1 SV=2
90	816	tr|Q5U2T0|Q5U2T0_RAT	60.31	5	5	1.4915E5	3	2	4		44494	Death associated protein 3 OS=Rattus norvegicus OX=10116 GN=Dap3 PE=2 SV=1
90	817	tr|F7EZZ0|F7EZZ0_RAT	60.31	5	5	1.4915E5	3	2	4		45112	Death-associated protein 3 OS=Rattus norvegicus OX=10116 GN=Dap3 PE=1 SV=1
90	1036	tr|A0A0G2K264|A0A0G2K264_RAT	60.31	5	5	1.4915E5	3	2	4		46666	Death-associated protein 3 OS=Rattus norvegicus OX=10116 GN=Dap3 PE=1 SV=1
87	233	P29147|BDH_RAT	60.12	10	10	7.5888E5	4	3	4		38202	D-beta-hydroxybutyrate dehydrogenase mitochondrial OS=Rattus norvegicus OX=10116 GN=Bdh1 PE=1 SV=2
87	234	tr|A0A0G2JSH2|A0A0G2JSH2_RAT	60.12	10	10	7.5888E5	4	3	4		38333	3-hydroxybutyrate dehydrogenase type 1 isoform CRA_a OS=Rattus norvegicus OX=10116 GN=Bdh1 PE=1 SV=1
120	6630	tr|F1LZW6|F1LZW6_RAT	58.01	2	2	2.8788E4	2	2	2		54099	Solute carrier family 25 member 13 OS=Rattus norvegicus OX=10116 GN=Slc25a13 PE=1 SV=2
120	11912	tr|A0A0G2K2J7|A0A0G2K2J7_RAT	58.01	3	3	2.8788E4	2	2	2		41504	Solute carrier family 25 member 12 OS=Rattus norvegicus OX=10116 GN=Slc25a12 PE=1 SV=1
120	11913	tr|F1LX07|F1LX07_RAT	58.01	2	2	2.8788E4	2	2	2		71917	Solute carrier family 25 member 12 OS=Rattus norvegicus OX=10116 GN=Slc25a12 PE=1 SV=3
103	322	Q09073|ADT2_RAT	57.96	8	8	1.6523E6	3	3	3		32901	ADP/ATP translocase 2 OS=Rattus norvegicus OX=10116 GN=Slc25a5 PE=1 SV=3
76	399	Q91XJ1|BECN1_RAT	57.72	3	3		3	0	5		51557	Beclin-1 OS=Rattus norvegicus OX=10116 GN=Becn1 PE=1 SV=1
104	295	Q8VID1|DHRS4_RAT	57.55	9	9	3.8865E5	3	3	3		29822	Dehydrogenase/reductase SDR family member 4 OS=Rattus norvegicus OX=10116 GN=Dhrs4 PE=2 SV=2
258	11920	tr|D4A3E8|D4A3E8_RAT	57.36	3	3	3.6939E5	1	1	1		47648	Mitochondrial ribosomal protein S27 OS=Rattus norvegicus OX=10116 GN=Mrps27 PE=1 SV=1
156	705	Q64565|AGT2_RAT	57.04	3	3	3.5709E4	2	2	2		57201	Alanine--glyoxylate aminotransferase 2 mitochondrial OS=Rattus norvegicus OX=10116 GN=Agxt2 PE=1 SV=2
157	119	tr|D3ZE15|D3ZE15_RAT	56.60	7	7	1.7342E5	2	2	2		16777	NADH:ubiquinone oxidoreductase subunit A13 OS=Rattus norvegicus OX=10116 GN=Ndufa13 PE=1 SV=1
153	343	tr|D3ZX69|D3ZX69_RAT	55.13	5	5	4.1453E5	1	1	2		29466	39S ribosomal protein L10 mitochondrial OS=Rattus norvegicus OX=10116 GN=Mrpl10 PE=1 SV=1
153	344	P0C2C4|RM10_RAT	55.13	5	5	4.1453E5	1	1	2		29940	39S ribosomal protein L10 mitochondrial OS=Rattus norvegicus OX=10116 GN=Mrpl10 PE=1 SV=1
142	267	tr|I6V4L9|I6V4L9_RAT	54.89	5	5	2.0885E5	1	1	2		29844	Cytochrome c oxidase subunit 3 OS=Rattus norvegicus OX=10116 GN=COX3 PE=3 SV=1
85	753	P08011|MGST1_RAT	52.39	8	8	4.5451E5	3	3	4		17472	Microsomal glutathione S-transferase 1 OS=Rattus norvegicus OX=10116 GN=Mgst1 PE=1 SV=3
85	754	tr|B6DYQ4|B6DYQ4_RAT	52.39	8	8	4.5451E5	3	3	4		17472	Microsomal glutathione S-transferase OS=Rattus norvegicus OX=10116 GN=Mgst1 PE=2 SV=1
152	281	tr|A9UMW2|A9UMW2_RAT	52.35	31	31	1.4716E6	2	2	2	Oxidation (M)	9255	Ndufa3 protein (Fragment) OS=Rattus norvegicus OX=10116 GN=Ndufa3 PE=2 SV=1
152	272	tr|M0RB63|M0RB63_RAT	52.35	31	31	1.4716E6	2	2	2	Oxidation (M)	9372	RCG63041 OS=Rattus norvegicus OX=10116 GN=LOC684509 PE=4 SV=1
152	282	tr|A0A0G2KAA3|A0A0G2KAA3_RAT	52.35	29	29	1.4716E6	2	2	2	Oxidation (M)	10170	NADH:ubiquinone oxidoreductase subunit A3 OS=Rattus norvegicus OX=10116 GN=Ndufa3 PE=1 SV=1
107	276	tr|A0A140TAG5|A0A140TAG5_RAT	51.63	3	3	6.2663E5	2	2	3		67049	MICOS complex subunit MIC60 OS=Rattus norvegicus OX=10116 GN=Immt PE=1 SV=1
107	277	Q3KR86|MIC60_RAT	51.63	3	3	6.2663E5	2	2	3		67177	MICOS complex subunit Mic60 (Fragment) OS=Rattus norvegicus OX=10116 GN=Immt PE=1 SV=1
107	273	tr|A0A0G2JVH4|A0A0G2JVH4_RAT	51.63	3	3	6.2663E5	2	2	3		86230	MICOS complex subunit MIC60 OS=Rattus norvegicus OX=10116 GN=Immt PE=1 SV=1
259	11921	tr|D4ACA5|D4ACA5_RAT	50.85	9	9	2.5943E5	1	1	1		18377	Mitochondrial import inner membrane translocase subunit TIM17 OS=Rattus norvegicus OX=10116 GN=LOC100911130 PE=1 SV=1
95	380	O70351|HCD2_RAT	49.73	9	9	1.8286E5	2	2	3		27246	3-hydroxyacyl-CoA dehydrogenase type-2 OS=Rattus norvegicus OX=10116 GN=Hsd17b10 PE=1 SV=3
95	381	tr|B0BMW2|B0BMW2_RAT	49.73	9	9	1.8286E5	2	2	3		27250	3-hydroxyacyl-CoA dehydrogenase type-2 OS=Rattus norvegicus OX=10116 GN=Hsd17b10 PE=1 SV=1
260	243	tr|D3ZS58|D3ZS58_RAT	49.55	11	11	2.7487E5	1	1	1		10845	NADH dehydrogenase [ubiquinone] 1 alpha subcomplex subunit 2 OS=Rattus norvegicus OX=10116 GN=Ndufa2 PE=1 SV=1
154	5939	P56571|ES1_RAT	48.89	4	4	0	1	1	2		28173	ES1 protein homolog mitochondrial OS=Rattus norvegicus OX=10116 PE=1 SV=2
158	396	tr|D3ZH23|D3ZH23_RAT	47.52	11	11	1.5168E4	2	2	2	Oxidation (M)	15195	Similar to mitochondrial ribosomal protein L41 OS=Rattus norvegicus OX=10116 GN=RGD1560917 PE=4 SV=1
158	397	Q5BJX1|RM41_RAT	47.52	11	11	1.5168E4	2	2	2	Oxidation (M)	15193	39S ribosomal protein L41 mitochondrial OS=Rattus norvegicus OX=10116 GN=Mrpl41 PE=1 SV=1
261	6074	B1WC61|ACAD9_RAT	46.22	2	2	2.0868E5	1	1	1		68843	Complex I assembly factor ACAD9 mitochondrial OS=Rattus norvegicus OX=10116 GN=Acad9 PE=1 SV=1
155	11923	P32089|TXTP_RAT	45.33	3	3	1.2085E5	1	1	2		33835	Tricarboxylate transport protein mitochondrial OS=Rattus norvegicus OX=10116 GN=Slc25a1 PE=1 SV=1
109	11922	Q9JJW3|ATPMD_RAT	44.46	21	21	1.8356E6	1	1	3		6408	ATP synthase membrane subunit DAPIT mitochondrial OS=Rattus norvegicus OX=10116 GN=Atp5md PE=1 SV=1
129	1045	Q2V057|HYPDH_RAT	43.98	4	4	5.658E6	2	2	2		51002	Hydroxyproline dehydrogenase OS=Rattus norvegicus OX=10116 GN=Prodh2 PE=2 SV=1
73	220	P12075|COX5B_RAT	43.58	22	22	3.1884E6	4	4	5		13915	Cytochrome c oxidase subunit 5B mitochondrial OS=Rattus norvegicus OX=10116 GN=Cox5b PE=1 SV=2
164	427	tr|G3V9J8|G3V9J8_RAT	42.96	2	2	2.1743E5	1	1	1		87521	Glycerol-3-phosphate acyltransferase 1 mitochondrial OS=Rattus norvegicus OX=10116 GN=Gpam PE=1 SV=2
164	413	tr|A0A0G2K2U7|A0A0G2K2U7_RAT	42.96	2	2	2.1743E5	1	1	1		93728	Glycerol-3-phosphate acyltransferase 1 mitochondrial OS=Rattus norvegicus OX=10116 GN=Gpam PE=1 SV=1
164	414	P97564|GPAT1_RAT	42.96	2	2	2.1743E5	1	1	1		93715	Glycerol-3-phosphate acyltransferase 1 mitochondrial OS=Rattus norvegicus OX=10116 GN=Gpam PE=1 SV=3
201	354	tr|Q3B8N9|Q3B8N9_RAT	42.89	3	3	2.4401E5	1	1	1		32823	Biphenyl hydrolase-like OS=Rattus norvegicus OX=10116 GN=Bphl PE=1 SV=1
32	368	tr|A0A0G2JWK2|A0A0G2JWK2_RAT	42.20	1	1	3.0277E5	1	1	19		53049	Methyl-CpG-binding protein 2 OS=Rattus norvegicus OX=10116 GN=Mecp2 PE=1 SV=1
32	369	Q00566|MECP2_RAT	42.20	1	1	3.0277E5	1	1	19		53048	Methyl-CpG-binding protein 2 OS=Rattus norvegicus OX=10116 GN=Mecp2 PE=1 SV=1
184	1422	tr|F1LPV8|F1LPV8_RAT	41.09	2	2	1.4723E5	1	1	1		46639	Succinate--CoA ligase [GDP-forming] subunit beta mitochondrial OS=Rattus norvegicus OX=10116 GN=Suclg2 PE=1 SV=2
184	1423	tr|B1H270|B1H270_RAT	41.09	2	2	1.4723E5	1	1	1		46988	Succinate--CoA ligase [GDP-forming] subunit beta mitochondrial OS=Rattus norvegicus OX=10116 GN=Suclg2 PE=2 SV=1
226	11915	Q63159|COQ3_RAT	41.03	3	3	1.824E5	1	1	1		38708	Ubiquinone biosynthesis O-methyltransferase mitochondrial OS=Rattus norvegicus OX=10116 GN=Coq3 PE=2 SV=2
229	309	P63039|CH60_RAT	40.87	2	2	4.4997E5	1	1	1		60956	60 kDa heat shock protein mitochondrial OS=Rattus norvegicus OX=10116 GN=Hspd1 PE=1 SV=1
229	310	tr|A0A482IDN3|A0A482IDN3_RAT	40.87	2	2	4.4997E5	1	1	1		60956	Hsp60 OS=Rattus norvegicus OX=10116 GN=Hspd1 PE=2 SV=1
128	293	Q9WVK3|PECR_RAT	40.85	7	7	6.4124E5	2	2	2	Oxidation (M)	32433	Peroxisomal trans-2-enoyl-CoA reductase OS=Rattus norvegicus OX=10116 GN=Pecr PE=2 SV=1
128	294	tr|A0A0G2JVG4|A0A0G2JVG4_RAT	40.85	7	7	6.4124E5	2	2	2	Oxidation (M)	32737	Peroxisomal trans-2-enoyl-CoA reductase OS=Rattus norvegicus OX=10116 GN=Pecr PE=1 SV=1
263	5949	tr|B2RYU0|B2RYU0_RAT	39.86	9	9	4.5063E5	1	1	1		11842	NADH dehydrogenase (Ubiquinone) 1 beta subcomplex 2 (Predicted) isoform CRA_b OS=Rattus norvegicus OX=10116 GN=Ndufb2 PE=1 SV=1
262	350	tr|Q35733|Q35733_RAT	39.48	13	13	1.5553E5	1	1	1		8389	NADH-ubiquinone oxidoreductase chain 6 (Fragment) OS=Rattus norvegicus OX=10116 PE=3 SV=1
262	351	tr|Q06QD9|Q06QD9_RAT	39.48	6	6	1.5553E5	1	1	1		18943	NADH-ubiquinone oxidoreductase chain 6 OS=Rattus norvegicus OX=10116 GN=ND6 PE=3 SV=1
262	352	tr|Q7HKW2|Q7HKW2_RAT	39.48	6	6	1.5553E5	1	1	1		18957	NADH-ubiquinone oxidoreductase chain 6 OS=Rattus norvegicus OX=10116 GN=NADH6 PE=3 SV=1
135	511	P32198|CPT1A_RAT	38.74	2	2	3.6389E5	2	1	2		88126	Carnitine O-palmitoyltransferase 1 liver isoform OS=Rattus norvegicus OX=10116 GN=Cpt1a PE=1 SV=2
83	601	Q5BJP6|RRF2M_RAT	38.72	2	2	1.6099E6	2	2	4	Formylation	85914	Ribosome-releasing factor 2 mitochondrial OS=Rattus norvegicus OX=10116 GN=Gfm2 PE=2 SV=2
83	602	tr|F1LMZ4|F1LMZ4_RAT	38.72	2	2	1.6099E6	2	2	4	Formylation	85914	Ribosome-releasing factor 2 mitochondrial OS=Rattus norvegicus OX=10116 GN=Gfm2 PE=1 SV=2
84	286	tr|A9UMV9|A9UMV9_RAT	38.55	11	11	1.8232E6	1	1	4		12500	NADH:ubiquinone oxidoreductase subunit A7 OS=Rattus norvegicus OX=10116 GN=Ndufa7 PE=1 SV=1
264	1169	Q9Z2Y0|KEG1_RAT	37.65	3	3	1.1821E5	1	1	1		34016	Glycine N-acyltransferase-like protein Keg1 OS=Rattus norvegicus OX=10116 GN=Keg1 PE=1 SV=2
264	1170	tr|B1H250|B1H250_RAT	37.65	3	3	1.1821E5	1	1	1		33986	Glycine-N-acyltransferase-like 1 OS=Rattus norvegicus OX=10116 GN=Glyatl1 PE=1 SV=1
264	1171	Q5PQT3|GLYAT_RAT	37.65	3	3	1.1821E5	1	1	1		33899	Glycine N-acyltransferase OS=Rattus norvegicus OX=10116 GN=Glyat PE=2 SV=1
264	1172	tr|A4PB92|A4PB92_RAT	37.65	3	3	1.1821E5	1	1	1		33899	Glycine N-acyltransferase OS=Rattus norvegicus OX=10116 GN=Glyat PE=2 SV=1
264	1173	tr|A0A0G2JWI5|A0A0G2JWI5_RAT	37.65	3	3	1.1821E5	1	1	1		39453	Glycine N-acyltransferase OS=Rattus norvegicus OX=10116 GN=Glyat PE=1 SV=1
204	623	tr|G3V6I5|G3V6I5_RAT	36.15	3	3	2.9761E5	1	1	1		46777	DnaJ heat shock protein family (Hsp40) member A3 OS=Rattus norvegicus OX=10116 GN=Dnaja3 PE=1 SV=2
204	624	tr|Q2TVU3|Q2TVU3_RAT	36.15	3	3	2.9761E5	1	1	1		49412	TID1 OS=Rattus norvegicus OX=10116 GN=Dnaja3 PE=2 SV=1
204	625	tr|A0A0G2K4Y1|A0A0G2K4Y1_RAT	36.15	3	3	2.9761E5	1	1	1		49416	DnaJ heat shock protein family (Hsp40) member A3 OS=Rattus norvegicus OX=10116 GN=Dnaja3 PE=1 SV=1
204	626	tr|Q2UZS7|Q2UZS7_RAT	36.15	2	2	2.9761E5	1	1	1		52399	Tid-1 long isoform OS=Rattus norvegicus OX=10116 GN=Dnaja3 PE=2 SV=1
204	627	tr|A0A0G2K5E4|A0A0G2K5E4_RAT	36.15	2	2	2.9761E5	1	1	1		52403	DnaJ heat shock protein family (Hsp40) member A3 OS=Rattus norvegicus OX=10116 GN=Dnaja3 PE=1 SV=1
228	162	tr|Q5EBA4|Q5EBA4_RAT	34.65	4	4	1.1944E5	1	1	1		33215	Nipsnap1 protein (Fragment) OS=Rattus norvegicus OX=10116 GN=Nipsnap1 PE=2 SV=1
228	163	tr|G3V728|G3V728_RAT	34.65	4	4	1.1944E5	1	1	1		33346	4-nitrophenylphosphatase domain and non-neuronal SNAP25-like protein homolog 1 (C. elegans) isoform CRA_b OS=Rattus norvegicus OX=10116 GN=Nipsnap1 PE=1 SV=1
205	762	B0BN56|RT31_RAT	33.49	4	4	2.4645E5	1	1	1		43962	28S ribosomal protein S31 mitochondrial OS=Rattus norvegicus OX=10116 GN=Mrps31 PE=2 SV=1
232	11918	tr|D3ZXF8|D3ZXF8_RAT	33.45	5	5	2.937E5	1	1	1		17575	Mitochondrial ribosomal protein L43 OS=Rattus norvegicus OX=10116 GN=Mrpl43 PE=1 SV=3
265	6121	tr|A0A0G2K401|A0A0G2K401_RAT	33.08	1	1	2.8489E5	1	1	1		79812	Propionyl-CoA carboxylase alpha chain mitochondrial OS=Rattus norvegicus OX=10116 GN=Pcca PE=1 SV=1
265	6122	tr|A0A0G2K5P9|A0A0G2K5P9_RAT	33.08	1	1	2.8489E5	1	1	1		81413	Propionyl-CoA carboxylase alpha chain mitochondrial OS=Rattus norvegicus OX=10116 GN=Pcca PE=1 SV=1
265	1119	P14882|PCCA_RAT	33.08	1	1	2.8489E5	1	1	1		81623	Propionyl-CoA carboxylase alpha chain mitochondrial OS=Rattus norvegicus OX=10116 GN=Pcca PE=1 SV=3
227	11916	Q5I0C5|FMT_RAT	32.46	2	2	7.0512E5	1	1	1	Formylation	42997	Methionyl-tRNA formyltransferase mitochondrial OS=Rattus norvegicus OX=10116 GN=Mtfmt PE=2 SV=1
139	1477	tr|D4AE90|D4AE90_RAT	31.93	3	3	0	2	1	2	Formylation	50113	RCC1-like OS=Rattus norvegicus OX=10116 GN=Rcc1l PE=1 SV=1
233	5951	tr|B2RZ57|B2RZ57_RAT	31.74	7	7	1.8033E5	1	1	1		20651	Mitochondrial ribosomal protein L18 OS=Rattus norvegicus OX=10116 GN=Mrpl18 PE=1 SV=1
136	1546	Q9EPJ3|RT26_RAT	31.65	12	12	6.1742E4	2	2	2	Oxidation (M)	23350	28S ribosomal protein S26 mitochondrial OS=Rattus norvegicus OX=10116 GN=Mrps26 PE=1 SV=1
101	6035	Q68FU7|COQ6_RAT	31.59	3	3	3.8314E5	2	2	3		51496	Ubiquinone biosynthesis monooxygenase COQ6 mitochondrial OS=Rattus norvegicus OX=10116 GN=Coq6 PE=2 SV=1
119	1285	Q80ZG6|BBC3_RAT	31.46	6	6	7.01E6	2	2	2		20718	Bcl-2-binding component 3 OS=Rattus norvegicus OX=10116 GN=Bbc3 PE=1 SV=1
110	374	P48037|ANXA6_RAT	31.24	1	1	1.6184E6	1	1	3		75754	Annexin A6 OS=Rattus norvegicus OX=10116 GN=Anxa6 PE=1 SV=2
110	375	tr|Q6IMZ3|Q6IMZ3_RAT	31.24	1	1	1.6184E6	1	1	3		75756	Annexin OS=Rattus norvegicus OX=10116 GN=Anxa6 PE=1 SV=1
266	11924	tr|A9UMV2|A9UMV2_RAT	31.09	5	5	1.4656E5	1	1	1		18742	Mitochondrial ribosomal protein S24 OS=Rattus norvegicus OX=10116 GN=Mrps24 PE=1 SV=1
266	11925	tr|A0A0G2K9G3|A0A0G2K9G3_RAT	31.09	4	4	1.4656E5	1	1	1		19827	Mitochondrial ribosomal protein S24 OS=Rattus norvegicus OX=10116 GN=Mrps24 PE=1 SV=1
267	1612	tr|D3ZY44|D3ZY44_RAT	30.43	4	4	3.7195E4	1	1	1		32176	Mitochondrial ribosomal protein S2 OS=Rattus norvegicus OX=10116 GN=Mrps2 PE=1 SV=1
202	1984	tr|B0BMT9|B0BMT9_RAT	2020-08-30	2	2	1.0593E5	1	1	1		50202	Sqrdl protein OS=Rattus norvegicus OX=10116 GN=Sqor PE=1 SV=1
111	11926	D3ZAF6|ATPK_RAT	29.98	10	10	1.2867E6	1	1	3		10452	ATP synthase subunit f mitochondrial OS=Rattus norvegicus OX=10116 GN=Atp5mf PE=1 SV=1
141	16	tr|F1LN92|F1LN92_RAT	29.83	2	2	2.4553E6	2	2	2		89352	AFG3-like matrix AAA peptidase subunit 2 OS=Rattus norvegicus OX=10116 GN=Afg3l2 PE=1 SV=1
143	347	P80433|COX8A_RAT	29.79	14	14	2.4312E5	1	1	2		7672	Cytochrome c oxidase subunit 8A mitochondrial OS=Rattus norvegicus OX=10116 GN=Cox8a PE=1 SV=3
79	428	tr|D4A1D3|D4A1D3_RAT	28.64	0	0	3.0836E6	2	1	4		521487	Sacsin molecular chaperone OS=Rattus norvegicus OX=10116 GN=Sacs PE=1 SV=2
137	338	tr|A0A0G2JYU2|A0A0G2JYU2_RAT	28.62	4	4	8.1859E5	1	1	2		20750	Mitochondrial ribosomal protein L11 OS=Rattus norvegicus OX=10116 GN=mrpl11 PE=1 SV=1
137	339	Q5XIE3|RM11_RAT	28.62	4	4	8.1859E5	1	1	2		22420	39S ribosomal protein L11 mitochondrial OS=Rattus norvegicus OX=10116 GN=Mrpl11 PE=2 SV=1
140	406	tr|D3ZD23|D3ZD23_RAT	26.82	1	1	3.7192E5	1	1	2		67300	ATP-binding cassette subfamily E member 1 OS=Rattus norvegicus OX=10116 GN=Abce1 PE=1 SV=1
270	11928	tr|B2GV62|B2GV62_RAT	26.49	7	7	2.3788E5	1	1	1		17526	Mitochondrial ribosomal protein L20 OS=Rattus norvegicus OX=10116 GN=Mrpl20 PE=1 SV=1
231	6178	P06761|BIP_RAT	25.61	1	1	1.196E5	1	1	1		72347	Endoplasmic reticulum chaperone BiP OS=Rattus norvegicus OX=10116 GN=Hspa5 PE=1 SV=1
231	11940	P55063|HS71L_RAT	25.61	1	1	1.196E5	1	1	1		70549	Heat shock 70 kDa protein 1-like OS=Rattus norvegicus OX=10116 GN=Hspa1l PE=2 SV=2
231	6652	P0DMW0|HS71A_RAT	25.61	1	1	1.196E5	1	1	1		70185	Heat shock 70 kDa protein 1A OS=Rattus norvegicus OX=10116 GN=Hspa1a PE=2 SV=1
231	6653	P0DMW1|HS71B_RAT	25.61	1	1	1.196E5	1	1	1		70185	Heat shock 70 kDa protein 1B OS=Rattus norvegicus OX=10116 GN=Hspa1b PE=2 SV=1
131	495	tr|D4ACN9|D4ACN9_RAT	25.39	4	4	6.4002E5	2	1	2		34267	Solute carrier family 25 member 36 OS=Rattus norvegicus OX=10116 GN=Slc25a36 PE=3 SV=1
271	6717	tr|A0A0G2K2R2|A0A0G2K2R2_RAT	24.89	4	4	9.1766E4	1	1	1		30788	Enoyl-CoA delta isomerase 1 mitochondrial OS=Rattus norvegicus OX=10116 GN=Eci1 PE=1 SV=1
271	6718	P23965|ECI1_RAT	24.89	4	4	9.1766E4	1	1	1		32254	Enoyl-CoA delta isomerase 1 mitochondrial OS=Rattus norvegicus OX=10116 GN=Eci1 PE=1 SV=1
271	6719	tr|Q68G41|Q68G41_RAT	24.89	4	4	9.1766E4	1	1	1		32264	Dodecenoyl-Coenzyme A delta isomerase (3 2 trans-enoyl-Coenzyme A isomerase) OS=Rattus norvegicus OX=10116 GN=Eci1 PE=1 SV=1
271	6720	tr|Q64592|Q64592_RAT	24.89	4	4	9.1766E4	1	1	1		32894	Delta3 delta2-enoyl-CoA isomerase OS=Rattus norvegicus OX=10116 PE=2 SV=1
174	382	Q01062|PDE2A_RAT	24.86	2	2	5.9259E5	1	1	1		104664	cGMP-dependent 3' 5'-cyclic phosphodiesterase OS=Rattus norvegicus OX=10116 GN=Pde2a PE=1 SV=2
174	383	tr|F8WFW5|F8WFW5_RAT	24.86	1	1	5.9259E5	1	1	1		105234	Phosphodiesterase OS=Rattus norvegicus OX=10116 GN=Pde2a PE=1 SV=1
203	1261	tr|Q5RKL4|Q5RKL4_RAT	23.97	1	1	0	1	1	1		95977	Dimethylglycine dehydrogenase OS=Rattus norvegicus OX=10116 GN=Dmgdh PE=1 SV=1
203	1262	Q63342|M2GD_RAT	23.97	1	1	0	1	1	1		96047	Dimethylglycine dehydrogenase mitochondrial OS=Rattus norvegicus OX=10116 GN=Dmgdh PE=1 SV=1
203	1268	tr|A0A0G2K9Y2|A0A0G2K9Y2_RAT	23.97	1	1	0	1	1	1		98864	Dimethylglycine dehydrogenase mitochondrial OS=Rattus norvegicus OX=10116 GN=Dmgdh PE=1 SV=1
272	11942	tr|A0A0U1RRX6|A0A0U1RRX6_RAT	23.63	9	9	6.3576E4	1	1	1		10726	5-demethoxyubiquinone hydroxylase mitochondrial (Fragment) OS=Rattus norvegicus OX=10116 GN=Coq7 PE=1 SV=1
272	11943	tr|G3V879|G3V879_RAT	23.63	5	5	6.3576E4	1	1	1		20126	5-demethoxyubiquinone hydroxylase mitochondrial OS=Rattus norvegicus OX=10116 GN=Coq7 PE=1 SV=4
273	192	tr|B5DEL8|B5DEL8_RAT	23.49	14	14	2.8915E5	1	1	1		12700	NADH dehydrogenase (Ubiquinone) Fe-S protein 5 OS=Rattus norvegicus OX=10116 GN=Ndufs5 PE=1 SV=1
273	193	tr|A0A0G2JZJ9|A0A0G2JZJ9_RAT	23.49	14	14	2.8915E5	1	1	1		12730	Uncharacterized protein OS=Rattus norvegicus OX=10116 PE=4 SV=1
277	400	tr|D4A7Q5|D4A7Q5_RAT	22.34	1	1	2.7474E5	1	1	1		59940	DEAD (Asp-Glu-Ala-Asp) box polypeptide 28 (Predicted) OS=Rattus norvegicus OX=10116 GN=Ddx28 PE=4 SV=1
114	501	tr|D4A4K4|D4A4K4_RAT	21.96	0	0	4.2781E6	1	1	2		418626	Vacuolar protein sorting 13 homolog C OS=Rattus norvegicus OX=10116 GN=Vps13c PE=1 SV=2
276	6337	P17178|CP27A_RAT	21.85	2	2	1.4126E5	1	1	1		60733	Sterol 26-hydroxylase mitochondrial OS=Rattus norvegicus OX=10116 GN=Cyp27a1 PE=1 SV=1
276	6338	tr|A0A0H2UHN7|A0A0H2UHN7_RAT	21.85	2	2	1.4126E5	1	1	1		62492	RCG24013 isoform CRA_a OS=Rattus norvegicus OX=10116 GN=Cyp27a1 PE=1 SV=1
86	403	Q01728|NAC1_RAT	21.61	1	1	7877600	1	1	4	Formylation	108184	Sodium/calcium exchanger 1 OS=Rattus norvegicus OX=10116 GN=Slc8a1 PE=1 SV=3
86	404	P70549|NAC3_RAT	21.61	1	1	7.8776E6	1	1	4	Formylation	103163	Sodium/calcium exchanger 3 OS=Rattus norvegicus OX=10116 GN=Slc8a3 PE=1 SV=1
219	1309	tr|B2GUW4|B2GUW4_RAT	21.49	1	1		1	0	1		74060	Exdl2 protein OS=Rattus norvegicus OX=10116 GN=Exd2 PE=2 SV=1
279	6661	M0R7Z9|PLIN5_RAT	21.40	1	1	0	1	1	1		51805	Perilipin-5 OS=Rattus norvegicus OX=10116 GN=Plin5 PE=1 SV=1
132	471	tr|A0A0G2JYY2|A0A0G2JYY2_RAT	21.30	2	2	3.8014E6	1	1	2		62571	5-aminolevulinate synthase OS=Rattus norvegicus OX=10116 GN=Alas1 PE=1 SV=1
132	472	tr|A0A0G2K962|A0A0G2K962_RAT	21.30	2	2	3.8014E6	1	1	2		71039	5-aminolevulinate synthase OS=Rattus norvegicus OX=10116 GN=Alas1 PE=1 SV=1
132	473	P13195|HEM1_RAT	21.30	2	2	3.8014E6	1	1	2		71021	5-aminolevulinate synthase nonspecific mitochondrial OS=Rattus norvegicus OX=10116 GN=Alas1 PE=2 SV=2
236	1390	Q811R2|PRGC2_RAT	20.74	1	1	2.2862E5	1	1	1		111589	Peroxisome proliferator-activated receptor gamma coactivator 1-beta OS=Rattus norvegicus OX=10116 GN=Ppargc1b PE=2 SV=2
196	733	tr|F1MA54|F1MA54_RAT	20.72	1	1	1.6936E5	1	1	1		49099	Protein-serine/threonine kinase OS=Rattus norvegicus OX=10116 GN=Pdk1 PE=1 SV=2
196	734	Q63065|PDK1_RAT	20.72	1	1	1.6936E5	1	1	1		49081	[Pyruvate dehydrogenase (acetyl-transferring)] kinase isozyme 1 mitochondrial OS=Rattus norvegicus OX=10116 GN=Pdk1 PE=1 SV=1
196	735	tr|Q5FVT5|Q5FVT5_RAT	20.72	1	1	1.6936E5	1	1	1		49095	Protein-serine/threonine kinase OS=Rattus norvegicus OX=10116 GN=Pdk1 PE=2 SV=1
196	1109	tr|B5DFI9|B5DFI9_RAT	20.72	1	1	1.6936E5	1	1	1		47944	Protein-serine/threonine kinase OS=Rattus norvegicus OX=10116 GN=Pdk3 PE=2 SV=1
280	300	tr|A0A0G2K9B4|A0A0G2K9B4_RAT	20.68	4	4	5.2364E5	1	1	1		33652	Mitochondrial ribosomal protein L15 OS=Rattus norvegicus OX=10116 GN=Mrpl15 PE=1 SV=1
281	226	tr|D3ZXF9|D3ZXF9_RAT	20.30	4	4	5.2364E5	1	1	1		29441	Mitochondrial ribosomal protein L12 OS=Rattus norvegicus OX=10116 GN=Mrpl12 PE=1 SV=1
97	531	P02563|MYH6_RAT	20.28	1	1	7.7659E6	1	1	3	Formylation	223506	Myosin-6 OS=Rattus norvegicus OX=10116 GN=Myh6 PE=1 SV=2

## Sheet: Monomer
Protein Group	Protein ID	Accession	-10lgP	Coverage (%)	Coverage (%) Sample 7	Area Sample 7	#Peptides	#Unique	#Spec Sample 7	PTM	Avg. Mass	Description
2	17	P10719|ATPB_RAT	404.32	61	61	3757700000	202	197	966	Oxidation (M)
2	18	tr|G3V6D3|G3V6D3_RAT	404.32	61	61	3757700000	202	197	966	Oxidation (M)
1	20	P15999|ATPA_RAT	363.73	59	59	3050800000	199	194	1112	Carbamidomethylation
1	21	tr|F1LP05|F1LP05_RAT	363.73	59	59	3050800000	199	194	1112	Carbamidomethylation
3	35	P52873|PYC_RAT	360.14	39	39	425370000	153	150	375	Oxidation (M)	129777	Pyruvate carboxylase mitochondrial OS=Rattus norvegicus OX=10116 GN=Pc PE=1 SV=2
3	34	tr|A0A0G2JTL5|A0A0G2JTL5_RAT	360.14	36	36	425370000	153	150	375	Oxidation (M)	140005	Pyruvate carboxylase mitochondrial OS=Rattus norvegicus OX=10116 GN=Pc PE=1 SV=1
5	280	P31399|ATP5H_RAT	326.71	73	73	306560000	58	56	168	Carbamidomethylation		ATP synthase subunit d mitochondrial OS=Rattus norvegicus OX=10116 GN=Atp5pd PE=1 SV=3
4	301	P35435|ATPG_RAT	297.02	56	56	433430000	67	66	204	Oxidation (M)	30191	ATP synthase subunit gamma mitochondrial OS=Rattus norvegicus OX=10116 GN=Atp5f1c PE=1 SV=2
4	297	tr|Q6QI09|Q6QI09_RAT	297.02	25	25	433430000	67	66	204	Oxidation (M)	67721	ATP synthase subunit gamma mitochondrial OS=Rattus norvegicus OX=10116 GN=Taf3 PE=1 SV=1
7	8	P07756|CPSM_RAT	252	25	25	93640000	70	68	131	Carbamidomethylation
6	268	P19511|AT5F1_RAT	226.48	29	29	376000000	36	36	134	Formylation	28869	ATP synthase F(0) complex subunit B1 mitochondrial OS=Rattus norvegicus OX=10116 GN=Atp5pb PE=1 SV=1
18	289	tr|D3ZFJ6|D3ZFJ6_RAT	222.73	17	17	15061000	17	17	27		60420	Lactamase beta OS=Rattus norvegicus OX=10116 GN=Lactb PE=1 SV=1
8	5938	Q06647|ATPO_RAT	218.5	48	48	123830000	45	43	115	Carbamidomethylation
9	5937	Q6PDU7|ATP5L_RAT	215.17	39	39	109760000	25	25	66	Oxidation (M)	11433	ATP synthase subunit g mitochondrial OS=Rattus norvegicus OX=10116 GN=Atp5mg PE=1 SV=2
15	15	P00507|AATM_RAT	208.27	24	24	35689000	22	21	36	Oxidation (M)	47314	Aspartate aminotransferase mitochondrial OS=Rattus norvegicus OX=10116 GN=Got2 PE=1 SV=2
10	387	tr|G3V7Y3|G3V7Y3_RAT	203.07	36	36	122500000	19	19	55	Oxidation (M)	17563	ATP synthase subunit delta mitochondrial OS=Rattus norvegicus OX=10116 GN=Atp5f1d PE=1 SV=1
11	1	Q02253|MMSA_RAT	196.28	19	19	15340000	26	25	51	Oxidation (M)	57808	Methylmalonate-semialdehyde dehydrogenase [acylating] mitochondrial OS=Rattus norvegicus OX=10116 GN=Aldh6a1 PE=1 SV=1
11	2	tr|G3V7J0|G3V7J0_RAT	196.28	19	19	15340000	26	25	51	Oxidation (M)	57748	Aldehyde dehydrogenase family 6 subfamily A1 isoform CRA_b OS=Rattus norvegicus OX=10116 GN=Aldh6a1 PE=1 SV=1
14	266	P04762|CATA_RAT	195.48	27	27	19116000	21	21	36	Oxidation (M)	59757	Catalase OS=Rattus norvegicus OX=10116 GN=Cat PE=1 SV=3
21	14	P10860|DHE3_RAT	193.93	20	20	8447200	17	17	21	Oxidation (M)		Glutamate dehydrogenase 1, mitochondrial
12	367	P0C2X9|AL4A1_RAT	168.52	28	28	23897000	25	24	48	Oxidation (M)	61869	Delta-1-pyrroline-5-carboxylate dehydrogenase mitochondrial OS=Rattus norvegicus OX=10116 GN=Aldh4a1 PE=1 SV=1
19	309	P63039|CH60_RAT	165.54	16	16	16778000	14	14	25	Oxidation (M)	60956	60 kDa heat shock protein mitochondrial OS=Rattus norvegicus OX=10116 GN=Hspd1 PE=1 SV=1
19	310	tr|A0A482IDN3|A0A482IDN3_RAT	165.54	16	16	16778000	14	14	25	Oxidation (M)	60956	Hsp60 OS=Rattus norvegicus OX=10116 GN=Hspd1 PE=2 SV=1
17	33	Q64428|ECHA_RAT	163.49	12	12	16344000	16	15	31	Carbamidomethylation		Trifunctional enzyme subunit alpha, mitochondrial
16	169	Q60587|ECHB_RAT	155.82	16	16	12681000	17	17	32	Oxidation (M)	51414	Trifunctional enzyme subunit beta mitochondrial OS=Rattus norvegicus OX=10116 GN=Hadhb PE=1 SV=1
16	170	tr|A0A0G2K330|A0A0G2K330_RAT	155.82	16	16	12681000	17	17	32	Oxidation (M)	52568	Trifunctional enzyme subunit beta mitochondrial OS=Rattus norvegicus OX=10116 GN=Hadhb PE=1 SV=1
57	667	tr|B2RZ24|B2RZ24_RAT	144.95	5	5	345780	4	4	4		47388	Succinate-CoA ligase subunit beta (Fragment) OS=Rattus norvegicus OX=10116 GN=Sucla2 PE=2 SV=1
57	668	tr|F1LM47|F1LM47_RAT	144.95	5	5	345780	4	4	4		50306	Succinate--CoA ligase [ADP-forming] subunit beta mitochondrial OS=Rattus norvegicus OX=10116 GN=Sucla2 PE=1 SV=1
22	245	P18163|ACSL1_RAT	141.49	9	9	8032700	10	10	20	Formylation	78179	Long-chain-fatty-acid--CoA ligase 1 OS=Rattus norvegicus OX=10116 GN=Acsl1 PE=1 SV=1
33	11911	P21571|ATP5J_RAT	137.22	31	31	4150100	6	6	8		12494	ATP synthase-coupling factor 6 mitochondrial OS=Rattus norvegicus OX=10116 GN=Atp5pf PE=1 SV=1
23	77	P22791|HMCS2_RAT	132.53	13	13	5839200	12	12	17		56912	Hydroxymethylglutaryl-CoA synthase mitochondrial OS=Rattus norvegicus OX=10116 GN=Hmgcs2 PE=1 SV=1
23	76	tr|Q68G44|Q68G44_RAT	132.53	13	13	5839200	12	12	17		56886	3-hydroxy-3-methylglutaryl coenzyme A synthase OS=Rattus norvegicus OX=10116 GN=Hmgcs2 PE=1 SV=1
24	100	P17764|THIL_RAT	127.55	13	13	5613000	8	8	13		44695	Acetyl-CoA acetyltransferase mitochondrial OS=Rattus norvegicus OX=10116 GN=Acat1 PE=1 SV=1
20	416	tr|Q5UAJ5|Q5UAJ5_RAT	124.72	42	42	50060000	7	6	23	Oxidation (M)	7642	ATP synthase protein 8 OS=Rattus norvegicus OX=10116 GN=ATP8 PE=3 SV=1
20	418	tr|Q8SEZ4|Q8SEZ4_RAT	124.72	42	42	50060000	7	6	23	Oxidation (M)	7632	ATP synthase protein 8 OS=Rattus norvegicus OX=10116 GN=ATPase8 PE=3 SV=1
13	5942	P05504|ATP6_RAT	121.92	35	35	32507000	18	17	45	Oxidation (M)		ATP synthase subunit a
13	5943	tr|Q8HIC7|Q8HIC7_RAT	121.92	35	35	32507000	18	17	45	Oxidation (M)
13	5944	tr|S5S1E9|S5S1E9_RAT	121.92	35	35	32507000	18	17	45	Oxidation (M)
49	814	P45953|ACADV_RAT	120.51	5	5	607180	4	4	4		70749	Very long-chain specific acyl-CoA dehydrogenase mitochondrial OS=Rattus norvegicus OX=10116 GN=Acadvl PE=1 SV=1
49	815	tr|Q5M9H2|Q5M9H2_RAT	120.51	5	5	607180	4	4	4		70821	Acyl-Coenzyme A dehydrogenase very long chain OS=Rattus norvegicus OX=10116 GN=Acadvl PE=1 SV=1
27	1292	tr|G3V6I4|G3V6I4_RAT	111.07	12	12	1379200	6	6	9	Formylation	37791	Mitochondrial amidoxime reducing component 1 OS=Rattus norvegicus OX=10116 GN=Marc1 PE=1 SV=1
44	22	tr|D3ZFQ8|D3ZFQ8_RAT	102.41	6	6	1848400	3	2	5		35435	Cytochrome c-1 OS=Rattus norvegicus OX=10116 GN=Cyc1 PE=1 SV=3
32	6503	B3DMA2|ACD11_RAT	96.59	6	6	1930500	6	4	8		87371	Acyl-CoA dehydrogenase family member 11 OS=Rattus norvegicus OX=10116 GN=Acad11 PE=1 SV=1
35	176	P13086|SUCA_RAT	94.66	9	9	1558900	5	5	6		36148	Succinate--CoA ligase [ADP/GDP-forming] subunit alpha mitochondrial OS=Rattus norvegicus OX=10116 GN=Suclg1 PE=2 SV=2
35	177	tr|A0A0H2UHE1|A0A0H2UHE1_RAT	94.66	9	9	1558900	5	5	6		37560	Succinate--CoA ligase [ADP/GDP-forming] subunit alpha mitochondrial OS=Rattus norvegicus OX=10116 GN=Suclg1 PE=1 SV=1
42	261	P24329|THTR_RAT	92.35	6	6	1237900	2	2	5		33407	Thiosulfate sulfurtransferase OS=Rattus norvegicus OX=10116 GN=Tst PE=1 SV=3
28	13	P32551|QCR2_RAT	88.74	5	5	2492000	6	6	9		48396	Cytochrome b-c1 complex subunit 2 mitochondrial OS=Rattus norvegicus OX=10116 GN=Uqcrc2 PE=1 SV=2
40	12	Q68FY0|QCR1_RAT	78.39	6	6	2660100	3	3	5		52849	Cytochrome b-c1 complex subunit 1 mitochondrial OS=Rattus norvegicus OX=10116 GN=Uqcrc1 PE=1 SV=1
151	80	P20788|UCRI_RAT	77.02	5	5	369530	1	1	1		29446	Cytochrome b-c1 complex subunit Rieske mitochondrial OS=Rattus norvegicus OX=10116 GN=Uqcrfs1 PE=1 SV=2
52	1610	A0A0G2K047|ACSS3_RAT	74.15	3	3	509790	2	2	4		74675	Acyl-CoA synthetase short-chain family member 3 mitochondrial OS=Rattus norvegicus OX=10116 GN=Acss3 PE=1 SV=1
85	11963	tr|Q5BJZ3|Q5BJZ3_RAT	66.58	2	2	2745300	2	2	2		113869	Nicotinamide nucleotide transhydrogenase OS=Rattus norvegicus OX=10116 GN=Nnt PE=1 SV=1
50	5947	Q924S5|LONM_RAT	63.57	2	2	406090	2	2	4		105792	Lon protease homolog mitochondrial OS=Rattus norvegicus OX=10116 GN=Lonp1 PE=2 SV=1
115	233	P29147|BDH_RAT	63.43	4	4	581710	2	2	2		38202	D-beta-hydroxybutyrate dehydrogenase mitochondrial OS=Rattus norvegicus OX=10116 GN=Bdh1 PE=1 SV=2
115	234	tr|A0A0G2JSH2|A0A0G2JSH2_RAT	63.43	4	4	581710	2	2	2		38333	3-hydroxybutyrate dehydrogenase type 1 isoform CRA_a OS=Rattus norvegicus OX=10116 GN=Bdh1 PE=1 SV=1
29	11914	P29419|ATP5I_RAT	62.94	37	37	5323500	4	4	9		8255	ATP synthase subunit e mitochondrial OS=Rattus norvegicus OX=10116 GN=Atp5me PE=1 SV=3
191	1171	Q5PQT3|GLYAT_RAT	58.49	4	4	97384	1	1	1		33899	Glycine N-acyltransferase OS=Rattus norvegicus OX=10116 GN=Glyat PE=2 SV=1
191	1172	tr|A4PB92|A4PB92_RAT	58.49	4	4	97384	1	1	1		33899	Glycine N-acyltransferase OS=Rattus norvegicus OX=10116 GN=Glyat PE=2 SV=1
191	1173	tr|A0A0G2JWI5|A0A0G2JWI5_RAT	58.49	3	3	97384	1	1	1		39453	Glycine N-acyltransferase OS=Rattus norvegicus OX=10116 GN=Glyat PE=1 SV=1
191	1170	tr|B1H250|B1H250_RAT	58.49	4	4	97384	1	1	1		33986	Glycine-N-acyltransferase-like 1 OS=Rattus norvegicus OX=10116 GN=Glyatl1 PE=1 SV=1
67	1939	tr|D4ACE9|D4ACE9_RAT	58.4	2	2	418350	2	2	3		103115	Alpha-aminoadipic semialdehyde synthase mitochondrial OS=Rattus norvegicus OX=10116 GN=Aass PE=1 SV=3
67	1940	A2VCW9|AASS_RAT	58.4	2	2	418350	2	2	3		102908	Alpha-aminoadipic semialdehyde synthase mitochondrial OS=Rattus norvegicus OX=10116 GN=Aass PE=2 SV=1
43	11922	Q9JJW3|ATPMD_RAT	55.76	29	29	4965000	3	3	5		6408	ATP synthase membrane subunit DAPIT mitochondrial OS=Rattus norvegicus OX=10116 GN=Atp5md PE=1 SV=1
26	399	Q91XJ1|BECN1_RAT	52.24	3	3		3	0	9		51557	Beclin-1 OS=Rattus norvegicus OX=10116 GN=Becn1 PE=1 SV=1
69	293	Q9WVK3|PECR_RAT	51.98	12	12	767510	3	3	3	Oxidation (M)	32433	Peroxisomal trans-2-enoyl-CoA reductase OS=Rattus norvegicus OX=10116 GN=Pecr PE=2 SV=1
69	294	tr|A0A0G2JVG4|A0A0G2JVG4_RAT	51.98	11	11	767510	3	3	3	Oxidation (M)	32737	Peroxisomal trans-2-enoyl-CoA reductase OS=Rattus norvegicus OX=10116 GN=Pecr PE=1 SV=1
112	218	tr|M0RAM5|M0RAM5_RAT	51.73	6	6	506980	2	2	2		22155	Glutathione peroxidase OS=Rattus norvegicus OX=10116 GN=Gpx1 PE=1 SV=1
112	219	P04041|GPX1_RAT	51.73	6	6	506980	2	2	2		22305	Glutathione peroxidase 1 OS=Rattus norvegicus OX=10116 GN=Gpx1 PE=1 SV=4
30	11926	D3ZAF6|ATPK_RAT	48.39	17	17	10349000	4	4	8		10452	ATP synthase subunit f mitochondrial OS=Rattus norvegicus OX=10116 GN=Atp5mf PE=1 SV=1
65	427	tr|G3V9J8|G3V9J8_RAT	46.83	3	3	14366000	2	2	3	Formylation	87521	Glycerol-3-phosphate acyltransferase 1 mitochondrial OS=Rattus norvegicus OX=10116 GN=Gpam PE=1 SV=2
65	413	tr|A0A0G2K2U7|A0A0G2K2U7_RAT	46.83	3	3	14366000	2	2	3	Formylation	93728	Glycerol-3-phosphate acyltransferase 1 mitochondrial OS=Rattus norvegicus OX=10116 GN=Gpam PE=1 SV=1
65	414	P97564|GPAT1_RAT	46.83	3	3	14366000	2	2	3	Formylation	93715	Glycerol-3-phosphate acyltransferase 1 mitochondrial OS=Rattus norvegicus OX=10116 GN=Gpam PE=1 SV=3
215	11952	P13803|ETFA_RAT	46.58	3	3	255700	1	1	1		34951	Electron transfer flavoprotein subunit alpha mitochondrial OS=Rattus norvegicus OX=10116 GN=Etfa PE=1 SV=4
110	2022	Q9Z0V6|PRDX3_RAT	46.07	5	5	844660	1	1	2		28295	Thioredoxin-dependent peroxide reductase mitochondrial OS=Rattus norvegicus OX=10116 GN=Prdx3 PE=1 SV=2
110	2021	tr|G3V7I0|G3V7I0_RAT	46.07	5	5	844660	1	1	2		28299	Peroxiredoxin 3 OS=Rattus norvegicus OX=10116 GN=Prdx3 PE=1 SV=1
102	394	P46462|TERA_RAT	45.01	3	3	461320	2	2	2		89349	Transitional endoplasmic reticulum ATPase OS=Rattus norvegicus OX=10116 GN=Vcp PE=1 SV=3
77	244	P07824|ARGI1_RAT	43.78	6	6	214350	2	1	3		34973	Arginase-1 OS=Rattus norvegicus OX=10116 GN=Arg1 PE=1 SV=2
71	41	tr|Q5UAJ6|Q5UAJ6_RAT	43.53	7	7	414580	2	2	3	Oxidation (M)	25942	Cytochrome c oxidase subunit 2 OS=Rattus norvegicus OX=10116 GN=COX2 PE=3 SV=1
71	81	tr|S5RZM8|S5RZM8_RAT	43.53	7	7	414580	2	2	3	Oxidation (M)	25958	Cytochrome c oxidase subunit 2 OS=Rattus norvegicus OX=10116 GN=COX2 PE=3 SV=1
71	82	P00406|COX2_RAT	43.53	7	7	414580	2	2	3	Oxidation (M)	25928	Cytochrome c oxidase subunit 2 OS=Rattus norvegicus OX=10116 GN=Mtco2 PE=1 SV=3
71	83	tr|Q8SEZ5|Q8SEZ5_RAT	43.53	7	7	414580	2	2	3	Oxidation (M)	25928	Cytochrome c oxidase subunit 2 OS=Rattus norvegicus OX=10116 GN=Mt-co2 PE=1 SV=1
71	84	tr|A0A097PE04|A0A097PE04_RAT	43.53	7	7	414580	2	2	3	Oxidation (M)	25894	Cytochrome c oxidase subunit 2 OS=Rattus norvegicus OX=10116 GN=COX2 PE=3 SV=1
216	198	P85834|EFTU_RAT	42.96	3	3	74258	1	1	1		49522	Elongation factor Tu mitochondrial OS=Rattus norvegicus OX=10116 GN=Tufm PE=1 SV=1
116	380	O70351|HCD2_RAT	42.91	7	7	565230	2	2	2		27246	3-hydroxyacyl-CoA dehydrogenase type-2 OS=Rattus norvegicus OX=10116 GN=Hsd17b10 PE=1 SV=3
116	381	tr|B0BMW2|B0BMW2_RAT	42.91	7	7	565230	2	2	2		27250	3-hydroxyacyl-CoA dehydrogenase type-2 OS=Rattus norvegicus OX=10116 GN=Hsd17b10 PE=1 SV=1
169	162	tr|Q5EBA4|Q5EBA4_RAT	42.44	4	4	499600	1	1	1	Oxidation (M)	33215	Nipsnap1 protein (Fragment) OS=Rattus norvegicus OX=10116 GN=Nipsnap1 PE=2 SV=1
169	163	tr|G3V728|G3V728_RAT	42.44	4	4	499600	1	1	1	Oxidation (M)	33346	4-nitrophenylphosphatase domain and non-neuronal SNAP25-like protein homolog 1 (C. elegans) isoform CRA_b OS=Rattus norvegicus OX=10116 GN=Nipsnap1 PE=1 SV=1
25	317	tr|A0A0G2JYD4|A0A0G2JYD4_RAT	41.32	1	1	6135900	4	4	10	Formylation	487857	Vacuolar protein sorting 13 homolog D OS=Rattus norvegicus OX=10116 GN=Vps13d PE=1 SV=1
25	318	tr|D3ZKC6|D3ZKC6_RAT	41.32	1	1	6135900	4	4	10	Formylation	488962	Vacuolar protein sorting 13 homolog D OS=Rattus norvegicus OX=10116 GN=Vps13d PE=1 SV=1
66	1985	tr|Q6QI69|Q6QI69_RAT	41.18	5	5	0	2	1	3		46014	LRRGT00139 OS=Rattus norvegicus OX=10116 GN=LOC500350 PE=2 SV=1
72	12296	tr|G3V734|G3V734_RAT	41.16	4	4	0	2	2	3		36133	2 4-dienoyl CoA reductase 1 mitochondrial isoform CRA_a OS=Rattus norvegicus OX=10116 GN=Decr1 PE=1 SV=1
72	12297	Q64591|DECR_RAT	41.16	4	4	0	2	2	3		36133	2 4-dienoyl-CoA reductase mitochondrial OS=Rattus norvegicus OX=10116 GN=Decr1 PE=1 SV=2
111	87	tr|A0A0S1Z1V9|A0A0S1Z1V9_RAT	40.87	3	3	323100	1	1	2		43002	Cytochrome b OS=Rattus norvegicus OX=10116 GN=CYTB PE=3 SV=1
111	225	tr|A0A411AID0|A0A411AID0_RAT	40.87	6	6	323100	1	1	2		23039	Cytochrome b (Fragment) OS=Rattus norvegicus OX=10116 GN=Cytb PE=3 SV=1
111	224	tr|H8Y1J4|H8Y1J4_RAT	40.87	6	6	323100	1	1	2		23531	Cytochrome b (Fragment) OS=Rattus norvegicus OX=10116 GN=cytb PE=4 SV=1
111	189	tr|A4UHZ2|A4UHZ2_RAT	40.87	5	5	323100	1	1	2		25312	Cytochrome b (Fragment) OS=Rattus norvegicus OX=10116 GN=cytb PE=4 SV=1
111	190	tr|B3Y999|B3Y999_RAT	40.87	5	5	323100	1	1	2		28378	Cytochrome b (Fragment) OS=Rattus norvegicus OX=10116 GN=cytb PE=4 SV=1
111	185	tr|K7T8L3|K7T8L3_RAT	40.87	5	5	323100	1	1	2		29017	Cytochrome b (Fragment) OS=Rattus norvegicus OX=10116 GN=cytb PE=4 SV=1
111	186	tr|A0A0U3BXX1|A0A0U3BXX1_RAT	40.87	4	4	323100	1	1	2		33684	Cytochrome b (Fragment) OS=Rattus norvegicus OX=10116 GN=Cytb PE=3 SV=1
111	187	tr|G8HZ47|G8HZ47_RAT	40.87	4	4	323100	1	1	2		35455	Cytochrome b (Fragment) OS=Rattus norvegicus OX=10116 GN=cytb PE=3 SV=1
111	167	tr|M9TEK6|M9TEK6_RAT	40.87	4	4	323100	1	1	2		35982	Cytochrome b (Fragment) OS=Rattus norvegicus OX=10116 GN=cytb PE=3 SV=1
111	113	tr|A0A411P2I9|A0A411P2I9_RAT	40.87	3	3	323100	1	1	2		40144	Cytochrome b (Fragment) OS=Rattus norvegicus OX=10116 GN=Cytb PE=3 SV=1
111	146	tr|E0A0C7|E0A0C7_RAT	40.87	3	3	323100	1	1	2		41009	Cytochrome b (Fragment) OS=Rattus norvegicus OX=10116 GN=cytb PE=3 SV=1
111	114	tr|A0A0U2IDR8|A0A0U2IDR8_RAT	40.87	3	3	323100	1	1	2		40981	Cytochrome b (Fragment) OS=Rattus norvegicus OX=10116 PE=3 SV=1
111	166	tr|A0A0U2UDS4|A0A0U2UDS4_RAT	40.87	3	3	323100	1	1	2		41049	Cytochrome b (Fragment) OS=Rattus norvegicus OX=10116 PE=3 SV=1
111	115	tr|A0A0U2M179|A0A0U2M179_RAT	40.87	3	3	323100	1	1	2		41037	Cytochrome b (Fragment) OS=Rattus norvegicus OX=10116 PE=3 SV=1
111	116	tr|A0A411P2L0|A0A411P2L0_RAT	40.87	3	3	323100	1	1	2		41017	Cytochrome b (Fragment) OS=Rattus norvegicus OX=10116 GN=Cytb PE=3 SV=1
111	147	tr|E0A016|E0A016_RAT	40.87	3	3	323100	1	1	2		41634	Cytochrome b (Fragment) OS=Rattus norvegicus OX=10116 GN=cytb PE=3 SV=1
111	90	tr|F8QU31|F8QU31_RAT	40.87	3	3	323100	1	1	2		42181	Cytochrome b (Fragment) OS=Rattus norvegicus OX=10116 GN=cytb PE=3 SV=1
111	91	tr|A0A411P2K0|A0A411P2K0_RAT	40.87	3	3	323100	1	1	2		42238	Cytochrome b (Fragment) OS=Rattus norvegicus OX=10116 GN=Cytb PE=3 SV=1
111	126	tr|E0A075|E0A075_RAT	40.87	3	3	323100	1	1	2		42410	Cytochrome b (Fragment) OS=Rattus norvegicus OX=10116 GN=cytb PE=3 SV=1
111	46	tr|L0L4L8|L0L4L8_RAT	40.87	3	3	323100	1	1	2		42470	Cytochrome b (Fragment) OS=Rattus norvegicus OX=10116 GN=cytb PE=3 SV=1
111	47	tr|A0A140GE10|A0A140GE10_RAT	40.87	3	3	323100	1	1	2		42574	Cytochrome b (Fragment) OS=Rattus norvegicus OX=10116 PE=3 SV=1
111	48	tr|A0A140GE11|A0A140GE11_RAT	40.87	3	3	323100	1	1	2		42588	Cytochrome b (Fragment) OS=Rattus norvegicus OX=10116 PE=3 SV=1
111	78	tr|A0A140GE08|A0A140GE08_RAT	40.87	3	3	323100	1	1	2		42527	Cytochrome b (Fragment) OS=Rattus norvegicus OX=10116 PE=3 SV=1
111	92	tr|A0A385HCC9|A0A385HCC9_RAT	40.87	3	3	323100	1	1	2		42766	Cytochrome b (Fragment) OS=Rattus norvegicus OX=10116 PE=3 SV=1
111	49	tr|A0A3Q8AGE8|A0A3Q8AGE8_RAT	40.87	3	3	323100	1	1	2		42712	Cytochrome b (Fragment) OS=Rattus norvegicus OX=10116 GN=Cytb PE=3 SV=1
111	50	tr|A0A3Q8AC68|A0A3Q8AC68_RAT	40.87	3	3	323100	1	1	2		42622	Cytochrome b (Fragment) OS=Rattus norvegicus OX=10116 GN=Cytb PE=3 SV=1
111	98	tr|A0A3S6FK13|A0A3S6FK13_RAT	40.87	3	3	323100	1	1	2		42702	Cytochrome b (Fragment) OS=Rattus norvegicus OX=10116 GN=Cytb PE=3 SV=1
111	127	tr|A0A385HCK1|A0A385HCK1_RAT	40.87	3	3	323100	1	1	2		42824	Cytochrome b (Fragment) OS=Rattus norvegicus OX=10116 PE=3 SV=1
111	102	tr|A0A3S6FK10|A0A3S6FK10_RAT	40.87	3	3	323100	1	1	2		42726	Cytochrome b (Fragment) OS=Rattus norvegicus OX=10116 GN=Cytb PE=3 SV=1
111	51	tr|A0A3S6FM15|A0A3S6FM15_RAT	40.87	3	3	323100	1	1	2		42698	Cytochrome b (Fragment) OS=Rattus norvegicus OX=10116 GN=Cytb PE=3 SV=1
111	188	tr|E0A019|E0A019_RAT	40.87	3	3	323100	1	1	2		43024	Cytochrome b (Fragment) OS=Rattus norvegicus OX=10116 GN=cytb PE=3 SV=1
111	85	tr|A0A097PE40|A0A097PE40_RAT	40.87	3	3	323100	1	1	2		42865	Cytochrome b OS=Rattus norvegicus OX=10116 GN=CYTB PE=3 SV=1
111	52	tr|A0A220D9Z6|A0A220D9Z6_RAT	40.87	3	3	323100	1	1	2		43018	Cytochrome b OS=Rattus norvegicus OX=10116 PE=3 SV=1
111	99	tr|D6NSP2|D6NSP2_RAT	40.87	3	3	323100	1	1	2		42945	Cytochrome b (Fragment) OS=Rattus norvegicus OX=10116 GN=cytb PE=3 SV=1
111	53	tr|D6NSS6|D6NSS6_RAT	40.87	3	3	323100	1	1	2		42993	Cytochrome b (Fragment) OS=Rattus norvegicus OX=10116 GN=cytb PE=3 SV=1
111	103	tr|L0N490|L0N490_RAT	40.87	3	3	323100	1	1	2		43056	Cytochrome b (Fragment) OS=Rattus norvegicus OX=10116 GN=cytb PE=3 SV=1
111	86	tr|D6NSQ3|D6NSQ3_RAT	40.87	3	3	323100	1	1	2		43012	Cytochrome b (Fragment) OS=Rattus norvegicus OX=10116 GN=cytb PE=3 SV=1
111	54	tr|D6NSR3|D6NSR3_RAT	40.87	3	3	323100	1	1	2		42986	Cytochrome b (Fragment) OS=Rattus norvegicus OX=10116 GN=cytb PE=3 SV=1
111	93	tr|D6NSP4|D6NSP4_RAT	40.87	3	3	323100	1	1	2		43016	Cytochrome b (Fragment) OS=Rattus norvegicus OX=10116 GN=cytb PE=3 SV=1
111	69	tr|D6NSQ8|D6NSQ8_RAT	40.87	3	3	323100	1	1	2		43016	Cytochrome b (Fragment) OS=Rattus norvegicus OX=10116 GN=cytb PE=3 SV=1
111	55	tr|D6NSR8|D6NSR8_RAT	40.87	3	3	323100	1	1	2		42998	Cytochrome b (Fragment) OS=Rattus norvegicus OX=10116 GN=cytb PE=3 SV=1
111	120	tr|F8QU37|F8QU37_RAT	40.87	3	3	323100	1	1	2		42992	Cytochrome b (Fragment) OS=Rattus norvegicus OX=10116 GN=cytb PE=3 SV=1
111	96	tr|F2Q6S6|F2Q6S6_RAT	40.87	3	3	323100	1	1	2		42938	Cytochrome b (Fragment) OS=Rattus norvegicus OX=10116 GN=cytb PE=3 SV=1
111	56	tr|A0A0A1FZ42|A0A0A1FZ42_RAT	40.87	3	3	323100	1	1	2		42989	Cytochrome b OS=Rattus norvegicus OX=10116 GN=CYTB PE=3 SV=1
111	57	tr|D6NSS7|D6NSS7_RAT	40.87	3	3	323100	1	1	2		42948	Cytochrome b (Fragment) OS=Rattus norvegicus OX=10116 GN=cytb PE=3 SV=1
111	58	tr|Q8SEY9|Q8SEY9_RAT	40.87	3	3	323100	1	1	2		43015	Cytochrome b OS=Rattus norvegicus OX=10116 GN=cytb PE=3 SV=1
111	44	tr|D6NSR7|D6NSR7_RAT	40.87	3	3	323100	1	1	2		42982	Cytochrome b (Fragment) OS=Rattus norvegicus OX=10116 GN=cytb PE=3 SV=1
111	59	tr|A0A220DA44|A0A220DA44_RAT	40.87	3	3	323100	1	1	2		42968	Cytochrome b OS=Rattus norvegicus OX=10116 PE=3 SV=1
111	79	tr|F2Q6S5|F2Q6S5_RAT	40.87	3	3	323100	1	1	2		42952	Cytochrome b (Fragment) OS=Rattus norvegicus OX=10116 GN=cytb PE=3 SV=1
111	70	tr|D6NSQ6|D6NSQ6_RAT	40.87	3	3	323100	1	1	2		42952	Cytochrome b (Fragment) OS=Rattus norvegicus OX=10116 GN=cytb PE=3 SV=1
111	104	tr|L0N495|L0N495_RAT	40.87	3	3	323100	1	1	2		42992	Cytochrome b (Fragment) OS=Rattus norvegicus OX=10116 GN=cytb PE=3 SV=1
111	60	tr|D6NSQ0|D6NSQ0_RAT	40.87	3	3	323100	1	1	2		42968	Cytochrome b (Fragment) OS=Rattus norvegicus OX=10116 GN=cytb PE=3 SV=1
111	61	tr|Q5UAI7|Q5UAI7_RAT	40.87	3	3	323100	1	1	2		42998	Cytochrome b OS=Rattus norvegicus OX=10116 GN=CYTB PE=3 SV=1
111	94	tr|D6NSR2|D6NSR2_RAT	40.87	3	3	323100	1	1	2		43073	Cytochrome b (Fragment) OS=Rattus norvegicus OX=10116 GN=cytb PE=3 SV=1
111	105	tr|B0M1Q8|B0M1Q8_RAT	40.87	3	3	323100	1	1	2		43026	Cytochrome b (Fragment) OS=Rattus norvegicus OX=10116 GN=cytb PE=3 SV=1
111	109	tr|D6NSR9|D6NSR9_RAT	40.87	3	3	323100	1	1	2		42970	Cytochrome b (Fragment) OS=Rattus norvegicus OX=10116 GN=cytb PE=3 SV=1
111	95	tr|D6NSR1|D6NSR1_RAT	40.87	3	3	323100	1	1	2		43002	Cytochrome b (Fragment) OS=Rattus norvegicus OX=10116 GN=cytb PE=3 SV=1
111	62	tr|Q8HIC4|Q8HIC4_RAT	40.87	3	3	323100	1	1	2		43012	Cytochrome b OS=Rattus norvegicus OX=10116 GN=Mt-cyb PE=3 SV=1
111	63	tr|A0A220DA02|A0A220DA02_RAT	40.87	3	3	323100	1	1	2		42968	Cytochrome b OS=Rattus norvegicus OX=10116 PE=3 SV=1
111	64	tr|A0A0S1Z1V4|A0A0S1Z1V4_RAT	40.87	3	3	323100	1	1	2		43016	Cytochrome b OS=Rattus norvegicus OX=10116 GN=CYTB PE=3 SV=1
111	88	tr|R9TKN1|R9TKN1_RAT	40.87	3	3	323100	1	1	2		43012	Cytochrome b OS=Rattus norvegicus OX=10116 GN=CYTB PE=3 SV=1
111	65	P00159|CYB_RAT	40.87	3	3	323100	1	1	2		43012	Cytochrome b OS=Rattus norvegicus OX=10116 GN=Mt-Cyb PE=3 SV=3
111	128	tr|D6NSP8|D6NSP8_RAT	40.87	3	3	323100	1	1	2		43100	Cytochrome b (Fragment) OS=Rattus norvegicus OX=10116 GN=cytb PE=3 SV=1
111	66	tr|L0N311|L0N311_RAT	40.87	3	3	323100	1	1	2		43045	Cytochrome b (Fragment) OS=Rattus norvegicus OX=10116 GN=cytb PE=3 SV=1
111	121	tr|A0A220DA20|A0A220DA20_RAT	40.87	3	3	323100	1	1	2		43010	Cytochrome b OS=Rattus norvegicus OX=10116 PE=3 SV=1
111	106	tr|A0A220D9W5|A0A220D9W5_RAT	40.87	3	3	323100	1	1	2		43028	Cytochrome b OS=Rattus norvegicus OX=10116 GN=cyt-b PE=3 SV=1
111	67	tr|A0A220DA28|A0A220DA28_RAT	40.87	3	3	323100	1	1	2		42970	Cytochrome b OS=Rattus norvegicus OX=10116 PE=3 SV=1
111	130	tr|R9TL61|R9TL61_RAT	40.87	3	3	323100	1	1	2		42980	Cytochrome b OS=Rattus norvegicus OX=10116 GN=CYTB PE=3 SV=1
111	107	tr|H6RXT5|H6RXT5_RAT	40.87	3	3	323100	1	1	2		43044	Cytochrome b OS=Rattus norvegicus OX=10116 GN=cytb PE=3 SV=1
111	68	tr|H2KXA0|H2KXA0_RAT	40.87	3	3	323100	1	1	2		42978	Cytochrome b (Fragment) OS=Rattus norvegicus OX=10116 GN=cytb PE=3 SV=1
111	108	tr|L0N1V8|L0N1V8_RAT	40.87	3	3	323100	1	1	2		43058	Cytochrome b (Fragment) OS=Rattus norvegicus OX=10116 GN=cytb PE=3 SV=1
111	101	tr|A0A096XNM4|A0A096XNM4_RAT	40.87	3	3	323100	1	1	2		43042	Cytochrome b (Fragment) OS=Rattus norvegicus OX=10116 PE=3 SV=1
111	129	tr|D6NSP7|D6NSP7_RAT	40.87	3	3	323100	1	1	2		43046	Cytochrome b (Fragment) OS=Rattus norvegicus OX=10116 GN=cytb PE=3 SV=1
111	122	tr|A0A220D9Z3|A0A220D9Z3_RAT	40.87	3	3	323100	1	1	2		43024	Cytochrome b OS=Rattus norvegicus OX=10116 PE=3 SV=1
111	89	tr|D6NSP5|D6NSP5_RAT	40.87	3	3	323100	1	1	2		43012	Cytochrome b (Fragment) OS=Rattus norvegicus OX=10116 GN=cytb PE=3 SV=1
111	97	tr|D6NSP6|D6NSP6_RAT	40.87	3	3	323100	1	1	2		43050	Cytochrome b (Fragment) OS=Rattus norvegicus OX=10116 GN=cytb PE=3 SV=1
39	428	tr|D4A1D3|D4A1D3_RAT	40.86	1	1	2471100	3	2	5	Carbamidomethylation
37	12306	Q8CGU6|NICA_RAT	39.55	3	3	1883600	3	2	6		78400	Nicastrin OS=Rattus norvegicus OX=10116 GN=Ncstn PE=1 SV=1
34	314	tr|D3ZHK4|D3ZHK4_RAT	38.21	1	1		3	0	7		182226	RB1-inducible coiled-coil 1 OS=Rattus norvegicus OX=10116 GN=Rb1cc1 PE=1 SV=1
107	623	tr|G3V6I5|G3V6I5_RAT	38.05	5	5	851720	2	2	2		46777	DnaJ heat shock protein family (Hsp40) member A3 OS=Rattus norvegicus OX=10116 GN=Dnaja3 PE=1 SV=2
107	624	tr|Q2TVU3|Q2TVU3_RAT	38.05	5	5	851720	2	2	2		49412	TID1 OS=Rattus norvegicus OX=10116 GN=Dnaja3 PE=2 SV=1
107	625	tr|A0A0G2K4Y1|A0A0G2K4Y1_RAT	38.05	5	5	851720	2	2	2		49416	DnaJ heat shock protein family (Hsp40) member A3 OS=Rattus norvegicus OX=10116 GN=Dnaja3 PE=1 SV=1
107	626	tr|Q2UZS7|Q2UZS7_RAT	38.05	5	5	851720	2	2	2		52399	Tid-1 long isoform OS=Rattus norvegicus OX=10116 GN=Dnaja3 PE=2 SV=1
107	627	tr|A0A0G2K5E4|A0A0G2K5E4_RAT	38.05	5	5	851720	2	2	2		52403	DnaJ heat shock protein family (Hsp40) member A3 OS=Rattus norvegicus OX=10116 GN=Dnaja3 PE=1 SV=1
45	6541	tr|D4A175|D4A175_RAT	36.95	2	2		2	0	5		53667	tRNA dimethylallyltransferase OS=Rattus norvegicus OX=10116 GN=Trit1 PE=3 SV=1
164	11913	tr|F1LX07|F1LX07_RAT	35.84	1	1	392960	1	1	1		71917	Solute carrier family 25 member 12 OS=Rattus norvegicus OX=10116 GN=Slc25a12 PE=1 SV=3
164	6630	tr|F1LZW6|F1LZW6_RAT	35.84	2	2	392960	1	1	1		54099	Solute carrier family 25 member 13 OS=Rattus norvegicus OX=10116 GN=Slc25a13 PE=1 SV=2
164	11912	tr|A0A0G2K2J7|A0A0G2K2J7_RAT	35.84	2	2	392960	1	1	1		41504	Solute carrier family 25 member 12 OS=Rattus norvegicus OX=10116 GN=Slc25a12 PE=1 SV=1
70	589	tr|F1LM33|F1LM33_RAT	35.33	1	1	0	2	1	3		156679	Leucine-rich PPR motif-containing protein mitochondrial OS=Rattus norvegicus OX=10116 GN=Lrpprc PE=1 SV=2
70	590	Q5SGE0|LPPRC_RAT	35.33	1	1	0	2	1	3		156652	Leucine-rich PPR motif-containing protein mitochondrial OS=Rattus norvegicus OX=10116 GN=Lrpprc PE=1 SV=1
31	888	O70600|RSAD2_RAT	35.28	6	6	10104000	2	2	8	Formylation	41255	Radical S-adenosyl methionine domain-containing protein 2 OS=Rattus norvegicus OX=10116 GN=Rsad2 PE=1 SV=1
31	889	tr|A0A0H2UHF4|A0A0H2UHF4_RAT	35.28	6	6	10104000	2	2	8	Formylation	41444	RCG62278 OS=Rattus norvegicus OX=10116 GN=Rsad2 PE=4 SV=1
190	279	Q5M9I5|QCR6_RAT	35.26	17	17	396150	1	1	1		10424	Cytochrome b-c1 complex subunit 6 mitochondrial OS=Rattus norvegicus OX=10116 GN=Uqcrh PE=3 SV=1
38	333	tr|A0A0G2K1Q1|A0A0G2K1Q1_RAT	34.66	1	1		2	0	6		107334	NLR family member X1 OS=Rattus norvegicus OX=10116 GN=Nlrx1 PE=1 SV=1
38	334	Q5FVQ8|NLRX1_RAT	34.66	1	1		2	0	6		107590	NLR family member X1 OS=Rattus norvegicus OX=10116 GN=Nlrx1 PE=2 SV=1
192	6579	tr|A0A0G2JYE8|A0A0G2JYE8_RAT	34.09	6	6	133810	1	1	1		20804	Serine--pyruvate aminotransferase mitochondrial OS=Rattus norvegicus OX=10116 GN=Agxt PE=1 SV=1
192	348	P09139|SPYA_RAT	34.09	3	3	133810	1	1	1		45834	Serine--pyruvate aminotransferase mitochondrial OS=Rattus norvegicus OX=10116 GN=Agxt PE=1 SV=1
61	5986	tr|D3Z899|D3Z899_RAT	32.73	3	3	742720	2	1	4	Formylation	61393	Mitoguardin 2 OS=Rattus norvegicus OX=10116 GN=Miga2 PE=1 SV=1
61	5993	tr|A0A0G2KAE6|A0A0G2KAE6_RAT	32.73	2	2	742720	2	1	4	Formylation	65660	Mitoguardin 2 OS=Rattus norvegicus OX=10116 GN=Miga2 PE=1 SV=1
189	1273	tr|A0A0G2K3W1|A0A0G2K3W1_RAT	31.46	3	3	176400	1	1	1		53760	von Willebrand factor A domain-containing 8 OS=Rattus norvegicus OX=10116 GN=Vwa8 PE=1 SV=1
95	6227	tr|A0A0H2UH92|A0A0H2UH92_RAT	30.79	1	1	5427400	2	2	2	Formylation	136526	Graves disease carrier protein OS=Rattus norvegicus OX=10116 GN=Slc25a16 PE=1 SV=1
95	6075	D3ZG52|DNA2_RAT	30.79	1	1	5427400	2	2	2	Formylation	119588	DNA replication ATP-dependent helicase/nuclease DNA2 OS=Rattus norvegicus OX=10116 GN=Dna2 PE=3 SV=1
119	1436	P30277|CCNB1_RAT	30.04	4	4	271390	2	1	2		47391	G2/mitotic-specific cyclin-B1 OS=Rattus norvegicus OX=10116 GN=Ccnb1 PE=2 SV=1
81	6369	tr|A0A0G2JVK4|A0A0G2JVK4_RAT	29.4	1	1		2	0	3		77802	Neurolysin mitochondrial OS=Rattus norvegicus OX=10116 GN=Nln PE=1 SV=1
81	6128	tr|A0A0G2JSY3|A0A0G2JSY3_RAT	29.4	1	1		2	0	3		80282	Neurolysin (Metallopeptidase M3 family) isoform CRA_a OS=Rattus norvegicus OX=10116 GN=Nln PE=1 SV=1
81	6129	P42676|NEUL_RAT	29.4	1	1		2	0	3		80254	Neurolysin mitochondrial OS=Rattus norvegicus OX=10116 GN=Nln PE=1 SV=1
68	595	D4A929|WDR81_RAT	28.88	1	1	0	2	1	3		212258	WD repeat-containing protein 81 OS=Rattus norvegicus OX=10116 GN=Wdr81 PE=3 SV=1
47	762	B0BN56|RT31_RAT	28.2	3	3		2	0	5		43962	28S ribosomal protein S31 mitochondrial OS=Rattus norvegicus OX=10116 GN=Mrps31 PE=2 SV=1
97	6664	tr|D3ZUM2|D3ZUM2_RAT	27.67	2	2	117490	2	1	2	Formylation	79688	Sterile alpha and TIR motif containing 1 (Predicted) OS=Rattus norvegicus OX=10116 GN=Sarm1 PE=1 SV=1
59	6015	tr|D4A5P3|D4A5P3_RAT	27.11	2	2		2	0	4		59813	Mitoguardin 1 OS=Rattus norvegicus OX=10116 GN=Miga1 PE=4 SV=1
59	5978	tr|A0A0G2K2T2|A0A0G2K2T2_RAT	27.11	2	2		2	0	4		67482	Mitoguardin 1 OS=Rattus norvegicus OX=10116 GN=Miga1 PE=4 SV=1
108	228	P16970|ABCD3_RAT	26.63	3	3	300990	2	2	2		75316	ATP-binding cassette sub-family D member 3 OS=Rattus norvegicus OX=10116 GN=Abcd3 PE=1 SV=3
79	957	Q5M821|PPM1H_RAT	25.62	2	2	566580	2	1	3		56380	Protein phosphatase 1H OS=Rattus norvegicus OX=10116 GN=Ppm1h PE=1 SV=2
218	23250	tr|Q9ESE3|Q9ESE3_RAT	25.32	5	5	229120	1	1	1		18186	5-aminolevulinate synthase (Fragment) OS=Rattus norvegicus OX=10116 GN=ALS2 PE=2 SV=1
218	677	Q63147|HEM0_RAT	25.32	2	2	229120	1	1	1		64842	5-aminolevulinate synthase erythroid-specific mitochondrial OS=Rattus norvegicus OX=10116 GN=Alas2 PE=1 SV=1
219	1261	tr|Q5RKL4|Q5RKL4_RAT	23.94	1	1	0	1	1	1		95977	Dimethylglycine dehydrogenase OS=Rattus norvegicus OX=10116 GN=Dmgdh PE=1 SV=1
219	1262	Q63342|M2GD_RAT	23.94	1	1	0	1	1	1		96047	Dimethylglycine dehydrogenase mitochondrial OS=Rattus norvegicus OX=10116 GN=Dmgdh PE=1 SV=1
219	1268	tr|A0A0G2K9Y2|A0A0G2K9Y2_RAT	23.94	1	1	0	1	1	1		98864	Dimethylglycine dehydrogenase mitochondrial OS=Rattus norvegicus OX=10116 GN=Dmgdh PE=1 SV=1
152	545	P11497|ACACA_RAT	23.78	0	0	586260	1	1	1		265191	Acetyl-CoA carboxylase 1 OS=Rattus norvegicus OX=10116 GN=Acaca PE=1 SV=1
63	11978	tr|A0A0A0MXU8|A0A0A0MXU8_RAT	23.7	4	4	17978000	1	1	3		18236	Caveolin OS=Rattus norvegicus OX=10116 GN=Cav2 PE=1 SV=1
63	11979	Q2IBC5|CAV2_RAT	23.7	4	4	17978000	1	1	3		18266	Caveolin-2 OS=Rattus norvegicus OX=10116 GN=Cav2 PE=1 SV=2
195	6337	P17178|CP27A_RAT	23.69	2	2	244940	1	1	1		60733	Sterol 26-hydroxylase mitochondrial OS=Rattus norvegicus OX=10116 GN=Cyp27a1 PE=1 SV=1
195	6338	tr|A0A0H2UHN7|A0A0H2UHN7_RAT	23.69	2	2	244940	1	1	1		62492	RCG24013 isoform CRA_a OS=Rattus norvegicus OX=10116 GN=Cyp27a1 PE=1 SV=1
220	17931	O88767|PARK7_RAT	22.97	5	5	0	1	1	1		19974	Protein/nucleic acid deglycase DJ-1 OS=Rattus norvegicus OX=10116 GN=Park7 PE=1 SV=1
220	23225	tr|Q5BKC3|Q5BKC3_RAT	22.97	5	5	0	1	1	1		22503	Park7 protein OS=Rattus norvegicus OX=10116 GN=Park7 PE=1 SV=1
118	33514	Q68FX0|IDH3B_RAT	22.7	2	2	744190	1	1	2		42354	Isocitrate dehydrogenase [NAD] subunit beta mitochondrial OS=Rattus norvegicus OX=10116 GN=Idh3B PE=2 SV=1
193	1503	tr|F1LSY7|F1LSY7_RAT	22.27	1	1	446290	1	1	1		109031	Endoplasmic reticulum to nucleus-signaling 1 OS=Rattus norvegicus OX=10116 GN=Ern1 PE=4 SV=2
193	1504	tr|A0A0G2K2H4|A0A0G2K2H4_RAT	22.27	1	1	446290	1	1	1		110150	Endoplasmic reticulum to nucleus-signaling 1 OS=Rattus norvegicus OX=10116 GN=Ern1 PE=2 SV=1
91	537	tr|D3ZKV7|D3ZKV7_RAT	21.73	0	0	305040	1	1	2	Formylation	309807	Trinucleotide repeat-containing 18 OS=Rattus norvegicus OX=10116 GN=Tnrc18 PE=1 SV=3
223	17980	Q5M9G9|FAKD4_RAT	21.39	1	1	1556800	1	1	1		71181	FAST kinase domain-containing protein 4 OS=Rattus norvegicus OX=10116 GN=Tbrg4 PE=2 SV=1
106	28163	Q9R1Z0|VDAC3_RAT	21.38	5	5	4460100	1	1	2	Formylation	30798	Voltage-dependent anion-selective channel protein 3 OS=Rattus norvegicus OX=10116 GN=Vdac3 PE=1 SV=2
147	1776	Q9Z286|ADCYA_RAT	21.37	0	0		1	0	1		185852	Adenylate cyclase type 10 OS=Rattus norvegicus OX=10116 GN=Adcy10 PE=1 SV=1
201	6675	Q5RKH7|S35F6_RAT	21.12	3	3	1052100	1	1	1	Carbamidomethylation	41092	Solute carrier family 35 member F6 OS=Rattus norvegicus OX=10116 GN=Slc35f6 PE=2 SV=1
94	1723	O88658|KIF1B_RAT	20.58	0	0	2002700	1	1	2		204169	Kinesin-like protein KIF1B OS=Rattus norvegicus OX=10116 GN=Kif1b PE=1 SV=2
196	465	P07633|PCCB_RAT	20.22	2	2	105340	1	1	1	Oxidation (M)	58626	Propionyl-CoA carboxylase beta chain mitochondrial OS=Rattus norvegicus OX=10116 GN=Pccb PE=2 SV=1
196	466	tr|Q68FZ8|Q68FZ8_RAT	20.22	2	2	105340	1	1	1	Oxidation (M)	58678	Propionyl coenzyme A carboxylase beta polypeptide OS=Rattus norvegicus OX=10116 GN=Pccb PE=1 SV=1
41	733	tr|F1MA54|F1MA54_RAT	20.1	2	2	45835000	1	1	5	Formylation	49099	Protein-serine/threonine kinase OS=Rattus norvegicus OX=10116 GN=Pdk1 PE=1 SV=2
41	734	Q63065|PDK1_RAT	20.1	2	2	45835000	1	1	5	Formylation	49081	[Pyruvate dehydrogenase (acetyl-transferring)] kinase isozyme 1 mitochondrial OS=Rattus norvegicus OX=10116 GN=Pdk1 PE=1 SV=1
41	735	tr|Q5FVT5|Q5FVT5_RAT	20.1	2	2	45835000	1	1	5	Formylation	49095	Protein-serine/threonine kinase OS=Rattus norvegicus OX=10116 GN=Pdk1 PE=2 SV=1
80	377	A0A0G2JZ79|SIR1_RAT	20.05	1	1	5410800	1	1	3		62059	NAD-dependent protein deacetylase sirtuin-1 OS=Rattus norvegicus OX=10116 GN=Sirt1 PE=3 SV=2
80	378	tr|A0A182DWI7|A0A182DWI7_RAT	20.05	1	1	5410800	1	1	3		81778	NAD-dependent protein deacetylase sirtuin-1 OS=Rattus norvegicus OX=10116 GN=Sirt1 PE=4 SV=1
