# Supplementary material for: Mitochondrial F-ATP Synthase Co-Migrating Proteins and Ca2+-Dependent Formation of Large Channels
Source: Cells. 2023 Oct 7;12(19):2414. doi: 10.3390/cells12192414 (PMC10572550; doi:10.3390/cells12192414)
Supplement: Supplementary file 1 [file cells-12-02414-s001.zip › Dataset S6.xlsx]

## Sheet: Dimer
Protein Group	Protein ID	Accession	-10lgP	Coverage (%)	Coverage (%) Sample 3	Area Sample 3	#Peptides	#Unique	#Spec Sample 3	PTM	Avg. Mass	Description
1	1	P10860|DHE3_RAT	384.07	68	68	491850000	228	225	442	Carbamidomethylation		Glutamate dehydrogenase 1, mitochondrial
3	8	P10719|ATPB_RAT	359.3	65	65	421470000	177	174	322	Oxidation (M)	56354	ATP synthase subunit beta mitochondrial OS=Rattus norvegicus OX=10116 GN=Atp5f1b PE=1 SV=2
3	9	tr|G3V6D3|G3V6D3_RAT	359.3	65	65	421470000	177	174	322	Oxidation (M)	56345	ATP synthase subunit beta OS=Rattus norvegicus OX=10116 GN=Atp5f1b PE=1 SV=1
2	10	P15999|ATPA_RAT	326.78	60	60	455610000	159	157	432	Carbamidomethylation
2	11	tr|F1LP05|F1LP05_RAT	326.78	60	60	455610000	159	157	432	Carbamidomethylation
8	119	P31399|ATP5H_RAT	264.38	61	61	34155000	36	35	59	Carbamidomethylation		ATP synthase subunit d, mitochondrial
4	4	P07756|CPSM_RAT	257.16	30	30	48893000	79	79	115	Oxidation (M)	164579	Carbamoyl-phosphate synthase [ammonia] mitochondrial OS=Rattus norvegicus OX=10116 GN=Cps1 PE=1 SV=1
5	15	P67779|PHB_RAT	248.83	57	57	52295000	55	55	83		29820	Prohibitin OS=Rattus norvegicus OX=10116 GN=Phb PE=1 SV=1
6	64	P35435|ATPG_RAT	245.02	37	37	48046000	36	36	82	Oxidation (M)	30191	ATP synthase subunit gamma mitochondrial OS=Rattus norvegicus OX=10116 GN=Atp5f1c PE=1 SV=2
6	63	tr|Q6QI09|Q6QI09_RAT	245.02	16	16	48046000	36	36	82	Oxidation (M)	67721	ATP synthase subunit gamma mitochondrial OS=Rattus norvegicus OX=10116 GN=Taf3 PE=1 SV=1
7	12	Q5XIH7|PHB2_RAT	225.53	48	48	33678000	46	45	71	Oxidation (M)	33312	Prohibitin-2 OS=Rattus norvegicus OX=10116 GN=Phb2 PE=1 SV=1
9	30	P52873|PYC_RAT	222.84	24	24	16830000	41	41	55	Oxidation (M)	129777	Pyruvate carboxylase mitochondrial OS=Rattus norvegicus OX=10116 GN=Pc PE=1 SV=2
9	31	tr|A0A0G2JTL5|A0A0G2JTL5_RAT	222.84	22	22	16830000	41	41	55	Oxidation (M)	140005	Pyruvate carboxylase mitochondrial OS=Rattus norvegicus OX=10116 GN=Pc PE=1 SV=1
11	20	P19234|NDUV2_RAT	218.11	39	39	23511000	29	29	49	Formylation	27378	NADH dehydrogenase [ubiquinone] flavoprotein 2 mitochondrial OS=Rattus norvegicus OX=10116 GN=Ndufv2 PE=1 SV=2
13	3	P85834|EFTU_RAT	214.69	27	27	11960000	30	30	40	Oxidation (M)	49522	Elongation factor Tu mitochondrial OS=Rattus norvegicus OX=10116 GN=Tufm PE=1 SV=1
12	13	Q66HF1|NDUS1_RAT	210.51	20	20	13976000	31	31	42		79412	NADH-ubiquinone oxidoreductase 75 kDa subunit mitochondrial OS=Rattus norvegicus OX=10116 GN=Ndufs1 PE=1 SV=1
10	246	P19511|AT5F1_RAT	199.97	30	30	47917000	27	27	54		28869	ATP synthase F(0) complex subunit B1 mitochondrial OS=Rattus norvegicus OX=10116 GN=Atp5pb PE=1 SV=1
15	26	P00507|AATM_RAT	196.49	27	27	14750000	23	23	33	Oxidation (M)	47314	Aspartate aminotransferase mitochondrial OS=Rattus norvegicus OX=10116 GN=Got2 PE=1 SV=2
16	22	tr|Q68G44|Q68G44_RAT	193.93	29	29	6077100	25	25	31		56886	3-hydroxy-3-methylglutaryl coenzyme A synthase OS=Rattus norvegicus OX=10116 GN=Hmgcs2 PE=1 SV=1
32	49	tr|B2RYS8|B2RYS8_RAT	187.03	21	21	4626100	11	11	15	Oxidation (M)	21959	NADH dehydrogenase [ubiquinone] 1 beta subcomplex subunit 8 mitochondrial OS=Rattus norvegicus OX=10116 GN=Ndufb8 PE=1 SV=1
17	19	Q641Y2|NDUS2_RAT	183.77	28	28	11024000	23	23	31	Oxidation (M)	52562	NADH dehydrogenase [ubiquinone] iron-sulfur protein 2 mitochondrial OS=Rattus norvegicus OX=10116 GN=Ndufs2 PE=1 SV=1
18	7	Q5BK63|NDUA9_RAT	182.64	32	32	5958900	22	21	29		42559	NADH dehydrogenase [ubiquinone] 1 alpha subcomplex subunit 9 mitochondrial OS=Rattus norvegicus OX=10116 GN=Ndufa9 PE=1 SV=2
26	171	tr|D3ZFJ6|D3ZFJ6_RAT	177.72	22	22	4506500	15	15	17	Carbamidomethylation	60420	Lactamase beta OS=Rattus norvegicus OX=10116 GN=Lactb PE=1 SV=1
45	136	P24329|THTR_RAT	168.08	13	13	1747100	8	8	9		33407	Thiosulfate sulfurtransferase OS=Rattus norvegicus OX=10116 GN=Tst PE=1 SV=3
21	350	tr|G3V7Y3|G3V7Y3_RAT	167.78	30	30	15667000	14	14	22	Oxidation (M)	17563	ATP synthase subunit delta mitochondrial OS=Rattus norvegicus OX=10116 GN=Atp5f1d PE=1 SV=1
31	32	P07895|SODM_RAT	164.03	28	28	1514900	10	10	15		24674	Superoxide dismutase [Mn] mitochondrial OS=Rattus norvegicus OX=10116 GN=Sod2 PE=1 SV=2
22	48	tr|D3ZF13|D3ZF13_RAT	163.06	29	29	7943600	13	13	21	Oxidation (M)	17514	Acyl carrier protein OS=Rattus norvegicus OX=10116 GN=Ndufab1 PE=1 SV=1
14	5802	Q06647|ATPO_RAT	162.52	45	45	14660000	21	20	36	Carbamidomethylation		ATP synthase subunit O, mitochondrial
34	204	tr|Q5PQZ9|Q5PQZ9_RAT	160.2	30	30	6177400	10	10	14		14359	NADH dehydrogenase [ubiquinone] 1 subunit C2 OS=Rattus norvegicus OX=10116 GN=Ndufc2 PE=1 SV=1
20	28	tr|D3ZG43|D3ZG43_RAT	157.32	33	33	7056100	18	18	24		30226	NADH dehydrogenase (Ubiquinone) Fe-S protein 3 (Predicted) isoform CRA_c OS=Rattus norvegicus OX=10116 GN=Ndufs3 PE=1 SV=1
25	16	Q68FY0|QCR1_RAT	154.18	16	16	3901700	15	15	18	Carbamidomethylation	52849	Cytochrome b-c1 complex subunit 1 mitochondrial OS=Rattus norvegicus OX=10116 GN=Uqcrc1 PE=1 SV=1
41	58	tr|D4A565|D4A565_RAT	147.34	21	21	3330100	7	7	9		21664	NADH dehydrogenase (Ubiquinone) 1 beta subcomplex 5 (Predicted) isoform CRA_b OS=Rattus norvegicus OX=10116 GN=Ndufb5 PE=1 SV=1
29	27	Q60587|ECHB_RAT	145.31	21	21	3512100	15	15	16		51414	Trifunctional enzyme subunit beta mitochondrial OS=Rattus norvegicus OX=10116 GN=Hadhb PE=1 SV=1
23	24	Q64428|ECHA_RAT	144.98	12	12	6439100	15	15	20	Formylation	82665	Trifunctional enzyme subunit alpha mitochondrial OS=Rattus norvegicus OX=10116 GN=Hadha PE=1 SV=2
30	50	Q02253|MMSA_RAT	140.27	17	17	1867600	15	15	16	Carbamidomethylation		Methylmalonate-semialdehyde dehydrogenase [acylating], mitochondrial
30	51	tr|G3V7J0|G3V7J0_RAT	140.27	17	17	1867600	15	15	16	Carbamidomethylation
24	35	P17764|THIL_RAT	139.39	22	22	5642800	13	13	19	Formylation	44695	Acetyl-CoA acetyltransferase mitochondrial OS=Rattus norvegicus OX=10116 GN=Acat1 PE=1 SV=1
39	137	tr|D4A7L4|D4A7L4_RAT	138.67	26	26	6926500	7	7	10		17634	NADH dehydrogenase (Ubiquinone) 1 beta subcomplex 11 (Predicted) OS=Rattus norvegicus OX=10116 GN=Ndufb11 PE=1 SV=1
19	1646	Q6PDU7|ATP5L_RAT	137.93	39	39	12431000	13	13	25	Oxidation (M)	11433	ATP synthase subunit g mitochondrial OS=Rattus norvegicus OX=10116 GN=Atp5mg PE=1 SV=2
48	38	tr|D3ZFQ8|D3ZFQ8_RAT	132.42	9	9	4201200	4	4	8		35435	Cytochrome c-1 OS=Rattus norvegicus OX=10116 GN=Cyc1 PE=1 SV=3
51	1044	tr|D4ACE9|D4ACE9_RAT	130.76	9	9	2751000	7	7	7	Formylation	103115	Alpha-aminoadipic semialdehyde synthase mitochondrial OS=Rattus norvegicus OX=10116 GN=Aass PE=1 SV=3
51	742	A2VCW9|AASS_RAT	130.76	9	9	2751000	7	7	7	Formylation	102908	Alpha-aminoadipic semialdehyde synthase mitochondrial OS=Rattus norvegicus OX=10116 GN=Aass PE=2 SV=1
27	46	P13086|SUCA_RAT	129.53	13	13	2651100	9	9	17		36148	Succinate--CoA ligase [ADP/GDP-forming] subunit alpha mitochondrial OS=Rattus norvegicus OX=10116 GN=Suclg1 PE=2 SV=2
27	47	tr|A0A0H2UHE1|A0A0H2UHE1_RAT	129.53	13	13	2651100	9	9	17		37560	Succinate--CoA ligase [ADP/GDP-forming] subunit alpha mitochondrial OS=Rattus norvegicus OX=10116 GN=Suclg1 PE=1 SV=1
35	66	tr|D4A0T0|D4A0T0_RAT	129.03	33	33	4559400	8	8	11	Oxidation (M)	20859	NADH:ubiquinone oxidoreductase subunit B10 OS=Rattus norvegicus OX=10116 GN=Ndufb10 PE=1 SV=1
36	45	P04762|CATA_RAT	127.85	9	9	1344800	9	9	11		59757	Catalase OS=Rattus norvegicus OX=10116 GN=Cat PE=1 SV=3
54	44	P11240|COX5A_RAT	126.62	31	31	2486300	5	5	7		16130	Cytochrome c oxidase subunit 5A mitochondrial OS=Rattus norvegicus OX=10116 GN=Cox5a PE=1 SV=1
50	55	tr|B0BNE6|B0BNE6_RAT	125.8	16	16	1494700	7	6	8		23970	NADH dehydrogenase (Ubiquinone) Fe-S protein 8 (Predicted) isoform CRA_a OS=Rattus norvegicus OX=10116 GN=Ndufs8 PE=1 SV=1
49	181	Q80W89|NDUAB_RAT	125.66	18	18	4908400	6	6	8		14854	NADH dehydrogenase [ubiquinone] 1 alpha subcomplex subunit 11 OS=Rattus norvegicus OX=10116 GN=Ndufa11 PE=2 SV=1
57	142	tr|D3ZCZ9|D3ZCZ9_RAT	118.49	21	21	1716400	5	5	7		13040	NADH dehydrogenase [ubiquinone] iron-sulfur protein 6 mitochondrial OS=Rattus norvegicus OX=10116 GN=LOC100912599 PE=1 SV=1
28	43	tr|Q5XIH3|Q5XIH3_RAT	115.48	11	11	8387300	8	8	16	Formylation	50731	NADH dehydrogenase [ubiquinone] flavoprotein 1 mitochondrial OS=Rattus norvegicus OX=10116 GN=Ndufv1 PE=1 SV=1
38	138	Q5XIF3|NDUS4_RAT	114.98	22	22	2519600	8	8	10		19741	NADH dehydrogenase [ubiquinone] iron-sulfur protein 4 mitochondrial OS=Rattus norvegicus OX=10116 GN=Ndufs4 PE=1 SV=1
44	57	Q561S0|NDUAA_RAT	113.27	15	15	3531000	7	7	9	Oxidation (M)	40493	NADH dehydrogenase [ubiquinone] 1 alpha subcomplex subunit 10 mitochondrial OS=Rattus norvegicus OX=10116 GN=Ndufa10 PE=1 SV=1
53	41	tr|D4A3V2|D4A3V2_RAT	111.96	29	29	1515400	7	7	7	Oxidation (M)	15224	NADH dehydrogenase [ubiquinone] 1 alpha subcomplex subunit 6 OS=Rattus norvegicus OX=10116 GN=Ndufa6 PE=1 SV=1
37	34	tr|A0A0G2JVL6|A0A0G2JVL6_RAT	110.04	25	25	1546600	6	6	11		19965	NADH dehydrogenase [ubiquinone] 1 alpha subcomplex subunit 8 OS=Rattus norvegicus OX=10116 GN=Ndufa8 PE=1 SV=1
33	21	P32551|QCR2_RAT	108.59	11	11	5066400	10	10	14		48396	Cytochrome b-c1 complex subunit 2 mitochondrial OS=Rattus norvegicus OX=10116 GN=Uqcrc2 PE=1 SV=2
62	249	tr|F1LXA0|F1LXA0_RAT	101.36	21	21	1569300	4	4	5		17178	NADH dehydrogenase [ubiquinone] 1 alpha subcomplex subunit 12 OS=Rattus norvegicus OX=10116 GN=Ndufa12 PE=1 SV=2
42	182	tr|Q06QG6|Q06QG6_RAT	101.34	8	8	1353800	7	7	9		68588	NADH-ubiquinone oxidoreductase chain 5 OS=Rattus norvegicus OX=10116 GN=ND5 PE=3 SV=1
67	42	P20788|UCRI_RAT	97.39	8	8	771200	3	3	4		29446	Cytochrome b-c1 complex subunit Rieske mitochondrial OS=Rattus norvegicus OX=10116 GN=Uqcrfs1 PE=1 SV=2
59	194	tr|Q5RJN0|Q5RJN0_RAT	95.2	15	15	813740	5	5	5	Oxidation (M)	23945	NADH dehydrogenase (Ubiquinone) Fe-S protein 7 OS=Rattus norvegicus OX=10116 GN=Ndufs7 PE=1 SV=1
52	111	tr|S5RZM8|S5RZM8_RAT	91.71	29	29	2113600	7	7	7	Oxidation (M)
52	112	P00406|COX2_RAT	91.71	29	29	2113600	7	7	7	Oxidation (M)		Cytochrome c oxidase subunit 2
52	104	tr|Q5UAJ6|Q5UAJ6_RAT	91.71	29	29	2113600	7	7	7	Oxidation (M)
52	113	tr|Q8SEZ5|Q8SEZ5_RAT	91.71	29	29	2113600	7	7	7	Oxidation (M)
52	114	tr|A0A097PE04|A0A097PE04_RAT	91.71	29	29	2113600	7	7	7	Oxidation (M)
55	210	tr|Q5M949|Q5M949_RAT	90.29	13	13	1620000	5	5	7		28340	Nipsnap homolog 3A (C. elegans) OS=Rattus norvegicus OX=10116 GN=Nipsnap3b PE=1 SV=1
46	1095	tr|Q5UAJ5|Q5UAJ5_RAT	89.84	30	30	7239900	5	4	9	Oxidation (M)	7642	ATP synthase protein 8 OS=Rattus norvegicus OX=10116 GN=ATP8 PE=3 SV=1
46	1097	tr|Q8SEZ4|Q8SEZ4_RAT	89.84	30	30	7239900	5	4	9	Oxidation (M)	7632	ATP synthase protein 8 OS=Rattus norvegicus OX=10116 GN=ATPase8 PE=3 SV=1
47	11740	P29419|ATP5I_RAT	85.39	34	34	3346600	4	4	9		8255	ATP synthase subunit e mitochondrial OS=Rattus norvegicus OX=10116 GN=Atp5me PE=1 SV=3
60	135	tr|D3ZZ21|D3ZZ21_RAT	83.7	27	27	1738600	4	4	5		15638	NADH dehydrogenase (Ubiquinone) 1 beta subcomplex 6 (Predicted) OS=Rattus norvegicus OX=10116 GN=Ndufb6 PE=1 SV=1
72	61	P29147|BDH_RAT	83.4	8	8	334760	4	3	4		38202	D-beta-hydroxybutyrate dehydrogenase mitochondrial OS=Rattus norvegicus OX=10116 GN=Bdh1 PE=1 SV=2
72	62	tr|A0A0G2JSH2|A0A0G2JSH2_RAT	83.4	8	8	334760	4	3	4		38333	3-hydroxybutyrate dehydrogenase type 1 isoform CRA_a OS=Rattus norvegicus OX=10116 GN=Bdh1 PE=1 SV=1
40	147	P05508|NU4M_RAT	82.09	9	9	682500	6	6	9		51783	NADH-ubiquinone oxidoreductase chain 4 OS=Rattus norvegicus OX=10116 GN=Mtnd4 PE=3 SV=3
40	148	tr|D2E6K0|D2E6K0_RAT	82.09	9	9	682500	6	6	9		51833	NADH-ubiquinone oxidoreductase chain 4 OS=Rattus norvegicus OX=10116 GN=ND4 PE=3 SV=1
40	149	tr|A7XYB9|A7XYB9_RAT	82.09	9	9	682500	6	6	9		51773	NADH-ubiquinone oxidoreductase chain 4 OS=Rattus norvegicus OX=10116 GN=Nd4 PE=3 SV=1
40	150	tr|Q06QE1|Q06QE1_RAT	82.09	9	9	682500	6	6	9		51851	NADH-ubiquinone oxidoreductase chain 4 OS=Rattus norvegicus OX=10116 GN=ND4 PE=3 SV=1
40	151	tr|Q06QA2|Q06QA2_RAT	82.09	9	9	682500	6	6	9		51787	NADH-ubiquinone oxidoreductase chain 4 OS=Rattus norvegicus OX=10116 GN=ND4 PE=3 SV=1
40	152	tr|Q7HKW3|Q7HKW3_RAT	82.09	9	9	682500	6	6	9		51801	NADH-ubiquinone oxidoreductase chain 4 (Fragment) OS=Rattus norvegicus OX=10116 GN=NADH4 PE=3 SV=1
40	153	tr|Q06QG7|Q06QG7_RAT	82.09	9	9	682500	6	6	9		51791	NADH-ubiquinone oxidoreductase chain 4 OS=Rattus norvegicus OX=10116 GN=ND4 PE=3 SV=1
40	154	tr|Q06Q89|Q06Q89_RAT	82.09	9	9	682500	6	6	9		51819	NADH-ubiquinone oxidoreductase chain 4 OS=Rattus norvegicus OX=10116 GN=ND4 PE=3 SV=1
40	155	tr|Q35737|Q35737_RAT	82.09	9	9	682500	6	6	9		51765	NADH-ubiquinone oxidoreductase chain 4 OS=Rattus norvegicus OX=10116 PE=3 SV=1
40	156	tr|Q8HIC6|Q8HIC6_RAT	82.09	9	9	682500	6	6	9		51783	NADH-ubiquinone oxidoreductase chain 4 OS=Rattus norvegicus OX=10116 GN=Mt-nd4 PE=3 SV=1
73	120	tr|A0A411P2I9|A0A411P2I9_RAT	81.26	10	10	850310	4	4	4		40144	Cytochrome b (Fragment) OS=Rattus norvegicus OX=10116 GN=Cytb PE=3 SV=1
73	132	tr|A0A0U2IDR8|A0A0U2IDR8_RAT	81.26	9	9	850310	4	4	4		40981	Cytochrome b (Fragment) OS=Rattus norvegicus OX=10116 PE=3 SV=1
73	121	tr|A0A0U2M179|A0A0U2M179_RAT	81.26	9	9	850310	4	4	4		41037	Cytochrome b (Fragment) OS=Rattus norvegicus OX=10116 PE=3 SV=1
73	122	tr|A0A411P2L0|A0A411P2L0_RAT	81.26	9	9	850310	4	4	4		41017	Cytochrome b (Fragment) OS=Rattus norvegicus OX=10116 GN=Cytb PE=3 SV=1
73	123	tr|F8QU31|F8QU31_RAT	81.26	9	9	850310	4	4	4		42181	Cytochrome b (Fragment) OS=Rattus norvegicus OX=10116 GN=cytb PE=3 SV=1
73	124	tr|A0A411P2K0|A0A411P2K0_RAT	81.26	9	9	850310	4	4	4		42238	Cytochrome b (Fragment) OS=Rattus norvegicus OX=10116 GN=Cytb PE=3 SV=1
73	67	tr|L0L4L8|L0L4L8_RAT	81.26	9	9	850310	4	4	4		42470	Cytochrome b (Fragment) OS=Rattus norvegicus OX=10116 GN=cytb PE=3 SV=1
73	68	tr|A0A140GE10|A0A140GE10_RAT	81.26	9	9	850310	4	4	4		42574	Cytochrome b (Fragment) OS=Rattus norvegicus OX=10116 PE=3 SV=1
73	69	tr|A0A140GE11|A0A140GE11_RAT	81.26	9	9	850310	4	4	4		42588	Cytochrome b (Fragment) OS=Rattus norvegicus OX=10116 PE=3 SV=1
73	70	tr|A0A140GE08|A0A140GE08_RAT	81.26	9	9	850310	4	4	4		42527	Cytochrome b (Fragment) OS=Rattus norvegicus OX=10116 PE=3 SV=1
73	125	tr|A0A385HCC9|A0A385HCC9_RAT	81.26	9	9	850310	4	4	4		42766	Cytochrome b (Fragment) OS=Rattus norvegicus OX=10116 PE=3 SV=1
73	71	tr|A0A3Q8AGE8|A0A3Q8AGE8_RAT	81.26	9	9	850310	4	4	4		42712	Cytochrome b (Fragment) OS=Rattus norvegicus OX=10116 GN=Cytb PE=3 SV=1
73	72	tr|A0A3Q8AC68|A0A3Q8AC68_RAT	81.26	9	9	850310	4	4	4		42622	Cytochrome b (Fragment) OS=Rattus norvegicus OX=10116 GN=Cytb PE=3 SV=1
73	73	tr|A0A3S6FK13|A0A3S6FK13_RAT	81.26	9	9	850310	4	4	4		42702	Cytochrome b (Fragment) OS=Rattus norvegicus OX=10116 GN=Cytb PE=3 SV=1
73	126	tr|A0A385HC93|A0A385HC93_RAT	81.26	9	9	850310	4	4	4		42751	Cytochrome b (Fragment) OS=Rattus norvegicus OX=10116 PE=3 SV=1
73	74	tr|A0A3S6FM15|A0A3S6FM15_RAT	81.26	9	9	850310	4	4	4		42698	Cytochrome b (Fragment) OS=Rattus norvegicus OX=10116 GN=Cytb PE=3 SV=1
73	76	tr|A0A220D9Z6|A0A220D9Z6_RAT	81.26	9	9	850310	4	4	4		43018	Cytochrome b OS=Rattus norvegicus OX=10116 PE=3 SV=1
73	77	tr|D6NSP2|D6NSP2_RAT	81.26	9	9	850310	4	4	4		42945	Cytochrome b (Fragment) OS=Rattus norvegicus OX=10116 GN=cytb PE=3 SV=1
73	78	tr|D6NSS6|D6NSS6_RAT	81.26	9	9	850310	4	4	4		42993	Cytochrome b (Fragment) OS=Rattus norvegicus OX=10116 GN=cytb PE=3 SV=1
73	79	tr|D6NSQ3|D6NSQ3_RAT	81.26	9	9	850310	4	4	4		43012	Cytochrome b (Fragment) OS=Rattus norvegicus OX=10116 GN=cytb PE=3 SV=1
73	80	tr|D6NSR3|D6NSR3_RAT	81.26	9	9	850310	4	4	4		42986	Cytochrome b (Fragment) OS=Rattus norvegicus OX=10116 GN=cytb PE=3 SV=1
73	127	tr|D6NSP4|D6NSP4_RAT	81.26	9	9	850310	4	4	4		43016	Cytochrome b (Fragment) OS=Rattus norvegicus OX=10116 GN=cytb PE=3 SV=1
73	81	tr|D6NSQ8|D6NSQ8_RAT	81.26	9	9	850310	4	4	4		43016	Cytochrome b (Fragment) OS=Rattus norvegicus OX=10116 GN=cytb PE=3 SV=1
73	82	tr|D6NSR8|D6NSR8_RAT	81.26	9	9	850310	4	4	4		42998	Cytochrome b (Fragment) OS=Rattus norvegicus OX=10116 GN=cytb PE=3 SV=1
73	103	tr|F8QU37|F8QU37_RAT	81.26	9	9	850310	4	4	4		42992	Cytochrome b (Fragment) OS=Rattus norvegicus OX=10116 GN=cytb PE=3 SV=1
73	83	tr|F2Q6S6|F2Q6S6_RAT	81.26	9	9	850310	4	4	4		42938	Cytochrome b (Fragment) OS=Rattus norvegicus OX=10116 GN=cytb PE=3 SV=1
73	84	tr|A0A0A1FZ42|A0A0A1FZ42_RAT	81.26	9	9	850310	4	4	4		42989	Cytochrome b OS=Rattus norvegicus OX=10116 GN=CYTB PE=3 SV=1
73	85	tr|D6NSS7|D6NSS7_RAT	81.26	9	9	850310	4	4	4		42948	Cytochrome b (Fragment) OS=Rattus norvegicus OX=10116 GN=cytb PE=3 SV=1
73	86	tr|Q8SEY9|Q8SEY9_RAT	81.26	9	9	850310	4	4	4		43015	Cytochrome b OS=Rattus norvegicus OX=10116 GN=cytb PE=3 SV=1
73	87	tr|D6NSR7|D6NSR7_RAT	81.26	9	9	850310	4	4	4		42982	Cytochrome b (Fragment) OS=Rattus norvegicus OX=10116 GN=cytb PE=3 SV=1
73	88	tr|A0A220DA44|A0A220DA44_RAT	81.26	9	9	850310	4	4	4		42968	Cytochrome b OS=Rattus norvegicus OX=10116 PE=3 SV=1
73	89	tr|F2Q6S5|F2Q6S5_RAT	81.26	9	9	850310	4	4	4		42952	Cytochrome b (Fragment) OS=Rattus norvegicus OX=10116 GN=cytb PE=3 SV=1
73	90	tr|D6NSQ6|D6NSQ6_RAT	81.26	9	9	850310	4	4	4		42952	Cytochrome b (Fragment) OS=Rattus norvegicus OX=10116 GN=cytb PE=3 SV=1
73	116	tr|D6NSQ0|D6NSQ0_RAT	81.26	9	9	850310	4	4	4		42968	Cytochrome b (Fragment) OS=Rattus norvegicus OX=10116 GN=cytb PE=3 SV=1
73	91	tr|Q5UAI7|Q5UAI7_RAT	81.26	9	9	850310	4	4	4		42998	Cytochrome b OS=Rattus norvegicus OX=10116 GN=CYTB PE=3 SV=1
73	128	tr|D6NSR2|D6NSR2_RAT	81.26	9	9	850310	4	4	4		43073	Cytochrome b (Fragment) OS=Rattus norvegicus OX=10116 GN=cytb PE=3 SV=1
73	92	tr|A0A0S1Z1V9|A0A0S1Z1V9_RAT	81.26	9	9	850310	4	4	4		43002	Cytochrome b OS=Rattus norvegicus OX=10116 GN=CYTB PE=3 SV=1
73	129	tr|D6NSR1|D6NSR1_RAT	81.26	9	9	850310	4	4	4		43002	Cytochrome b (Fragment) OS=Rattus norvegicus OX=10116 GN=cytb PE=3 SV=1
73	93	tr|Q8HIC4|Q8HIC4_RAT	81.26	9	9	850310	4	4	4		43012	Cytochrome b OS=Rattus norvegicus OX=10116 GN=Mt-cyb PE=3 SV=1
73	94	tr|A0A220DA02|A0A220DA02_RAT	81.26	9	9	850310	4	4	4		42968	Cytochrome b OS=Rattus norvegicus OX=10116 PE=3 SV=1
73	95	tr|A0A0S1Z1V4|A0A0S1Z1V4_RAT	81.26	9	9	850310	4	4	4		43016	Cytochrome b OS=Rattus norvegicus OX=10116 GN=CYTB PE=3 SV=1
73	96	tr|R9TKN1|R9TKN1_RAT	81.26	9	9	850310	4	4	4		43012	Cytochrome b OS=Rattus norvegicus OX=10116 GN=CYTB PE=3 SV=1
73	97	P00159|CYB_RAT	81.26	9	9	850310	4	4	4		43012	Cytochrome b OS=Rattus norvegicus OX=10116 GN=Mt-Cyb PE=3 SV=3
73	98	tr|L0N311|L0N311_RAT	81.26	9	9	850310	4	4	4		43045	Cytochrome b (Fragment) OS=Rattus norvegicus OX=10116 GN=cytb PE=3 SV=1
73	99	tr|A0A220DA28|A0A220DA28_RAT	81.26	9	9	850310	4	4	4		42970	Cytochrome b OS=Rattus norvegicus OX=10116 PE=3 SV=1
73	100	tr|H2KXA0|H2KXA0_RAT	81.26	9	9	850310	4	4	4		42978	Cytochrome b (Fragment) OS=Rattus norvegicus OX=10116 GN=cytb PE=3 SV=1
73	101	tr|A0A096XNM4|A0A096XNM4_RAT	81.26	9	9	850310	4	4	4		43042	Cytochrome b (Fragment) OS=Rattus norvegicus OX=10116 PE=3 SV=1
73	102	tr|D6NSP5|D6NSP5_RAT	81.26	9	9	850310	4	4	4		43012	Cytochrome b (Fragment) OS=Rattus norvegicus OX=10116 GN=cytb PE=3 SV=1
126	145	tr|F1LPG5|F1LPG5_RAT	80.25	11	11	874270	2	2	2		15064	NADH:ubiquinone oxidoreductase subunit B4 OS=Rattus norvegicus OX=10116 GN=Ndufb4 PE=1 SV=1
106	258	tr|M0RB63|M0RB63_RAT	76.64	31	31	0	2	2	2	Oxidation (M)	9372	RCG63041 OS=Rattus norvegicus OX=10116 GN=LOC684509 PE=4 SV=1
106	257	tr|A9UMW2|A9UMW2_RAT	76.64	31	31	0	2	2	2	Oxidation (M)	9255	Ndufa3 protein (Fragment) OS=Rattus norvegicus OX=10116 GN=Ndufa3 PE=2 SV=1
106	259	tr|A0A0G2KAA3|A0A0G2KAA3_RAT	76.64	29	29	0	2	2	2	Oxidation (M)	10170	NADH:ubiquinone oxidoreductase subunit A3 OS=Rattus norvegicus OX=10116 GN=Ndufa3 PE=1 SV=1
98	202	tr|Q5M9H2|Q5M9H2_RAT	74.08	3	3	356170	2	2	2		70821	Acyl-Coenzyme A dehydrogenase very long chain OS=Rattus norvegicus OX=10116 GN=Acadvl PE=1 SV=1
98	201	P45953|ACADV_RAT	74.08	3	3	356170	2	2	2		70749	Very long-chain specific acyl-CoA dehydrogenase mitochondrial OS=Rattus norvegicus OX=10116 GN=Acadvl PE=1 SV=1
100	109	tr|A0A140TAG5|A0A140TAG5_RAT	72.48	4	4	383040	2	2	2		67049	MICOS complex subunit MIC60 OS=Rattus norvegicus OX=10116 GN=Immt PE=1 SV=1
100	110	Q3KR86|MIC60_RAT	72.48	4	4	383040	2	2	2		67177	MICOS complex subunit Mic60 (Fragment) OS=Rattus norvegicus OX=10116 GN=Immt PE=1 SV=1
100	115	tr|A0A0G2JVH4|A0A0G2JVH4_RAT	72.48	3	3	383040	2	2	2		86230	MICOS complex subunit MIC60 OS=Rattus norvegicus OX=10116 GN=Immt PE=1 SV=1
79	139	Q6AXV4|SAM50_RAT	72.26	6	6	129970	3	3	3		51960	Sorting and assembly machinery component 50 homolog OS=Rattus norvegicus OX=10116 GN=Samm50 PE=1 SV=1
89	140	tr|F1LN88|F1LN88_RAT	71.9	6	6	254000	3	3	3		56517	Aldehyde dehydrogenase mitochondrial OS=Rattus norvegicus OX=10116 GN=Aldh2 PE=1 SV=2
89	141	P11884|ALDH2_RAT	71.9	6	6	254000	3	3	3		56488	Aldehyde dehydrogenase mitochondrial OS=Rattus norvegicus OX=10116 GN=Aldh2 PE=1 SV=1
85	346	tr|D3ZS58|D3ZS58_RAT	71.84	23	23	642530	3	3	3		10845	NADH dehydrogenase [ubiquinone] 1 alpha subcomplex subunit 2 OS=Rattus norvegicus OX=10116 GN=Ndufa2 PE=1 SV=1
61	192	tr|A0A0G2JSH5|A0A0G2JSH5_RAT	71.21	5	5	2562900	4	4	5	Formylation	68759	Serum albumin OS=Rattus norvegicus OX=10116 GN=Alb PE=1 SV=1
63	245	tr|A9UMV9|A9UMV9_RAT	71.05	19	19	2362900	2	2	5		12500	NADH:ubiquinone oxidoreductase subunit A7 OS=Rattus norvegicus OX=10116 GN=Ndufa7 PE=1 SV=1
88	65	tr|D3ZE15|D3ZE15_RAT	69.36	19	19	644630	3	3	3	Oxidation (M)	16777	NADH:ubiquinone oxidoreductase subunit A13 OS=Rattus norvegicus OX=10116 GN=Ndufa13 PE=1 SV=1
71	297	Q924S5|LONM_RAT	68.69	3	3	342500	3	3	4		105792	Lon protease homolog mitochondrial OS=Rattus norvegicus OX=10116 GN=Lonp1 PE=2 SV=1
261	277	tr|B2RZ24|B2RZ24_RAT	67.94	4	4	0	1	1	1		47388	Succinate-CoA ligase subunit beta (Fragment) OS=Rattus norvegicus OX=10116 GN=Sucla2 PE=2 SV=1
261	278	tr|F1LM47|F1LM47_RAT	67.94	4	4	0	1	1	1		50306	Succinate--CoA ligase [ADP-forming] subunit beta mitochondrial OS=Rattus norvegicus OX=10116 GN=Sucla2 PE=1 SV=1
56	54	P18163|ACSL1_RAT	67.92	5	5	809240	5	3	7		78179	Long-chain-fatty-acid--CoA ligase 1 OS=Rattus norvegicus OX=10116 GN=Acsl1 PE=1 SV=1
65	190	P07824|ARGI1_RAT	67.48	12	12	737200	3	3	4		34973	Arginase-1 OS=Rattus norvegicus OX=10116 GN=Arg1 PE=1 SV=2
87	143	tr|Q5EBA4|Q5EBA4_RAT	66.89	11	11	499240	3	3	3	Oxidation (M)	33215	Nipsnap1 protein (Fragment) OS=Rattus norvegicus OX=10116 GN=Nipsnap1 PE=2 SV=1
87	144	tr|G3V728|G3V728_RAT	66.89	11	11	499240	3	3	3	Oxidation (M)	33346	4-nitrophenylphosphatase domain and non-neuronal SNAP25-like protein homolog 1 (C. elegans) isoform CRA_b OS=Rattus norvegicus OX=10116 GN=Nipsnap1 PE=1 SV=1
43	689	tr|Q549I0|Q549I0_RAT	64.28	18	18	711970	5	5	9	Oxidation (M)
43	690	P05504|ATP6_RAT	64.28	18	18	711970	5	5	9	Oxidation (M)		ATP synthase subunit a
43	691	tr|Q8HIC7|Q8HIC7_RAT	64.28	18	18	711970	5	5	9	Oxidation (M)
43	692	tr|S5S1E9|S5S1E9_RAT	64.28	18	18	711970	5	5	9	Oxidation (M)
43	693	tr|Q06QE5|Q06QE5_RAT	64.28	18	18	711970	5	5	9	Oxidation (M)
43	459	tr|Q8SEZ3|Q8SEZ3_RAT	64.28	18	18	711970	5	5	9	Oxidation (M)
80	207	tr|G3V6I4|G3V6I4_RAT	59.34	7	7	230170	2	2	3		37791	Mitochondrial amidoxime reducing component 1 OS=Rattus norvegicus OX=10116 GN=Marc1 PE=1 SV=1
125	222	tr|Q4G067|Q4G067_RAT	58.68	4	4	351110	2	2	2		37440	Mitochondrial ribosomal protein L44 OS=Rattus norvegicus OX=10116 GN=Mrpl44 PE=1 SV=1
69	366	P33124|ACSL6_RAT	57.69	3	3	104530	3	1	4	Formylation	78180	Long-chain-fatty-acid--CoA ligase 6 OS=Rattus norvegicus OX=10116 GN=Acsl6 PE=1 SV=1
58	446	Q91XJ1|BECN1_RAT	56.12	3	3		3	0	6		51557	Beclin-1 OS=Rattus norvegicus OX=10116 GN=Becn1 PE=1 SV=1
187	248	tr|D3ZUX5|D3ZUX5_RAT	55.73	5	5	187130	1	1	1		26435	MICOS complex subunit OS=Rattus norvegicus OX=10116 GN=Chchd3 PE=1 SV=1
91	5817	P21571|ATP5J_RAT	54.59	19	19	542800	2	2	3		12494	ATP synthase-coupling factor 6 mitochondrial OS=Rattus norvegicus OX=10116 GN=Atp5pf PE=1 SV=1
77	225	tr|Q8SEZ8|Q8SEZ8_RAT	53.86	7	7	803760	3	3	3		36133	NADH-ubiquinone oxidoreductase chain 1 (Fragment) OS=Rattus norvegicus OX=10116 GN=NADH1 PE=3 SV=1
77	226	P03889|NU1M_RAT	53.86	7	7	803760	3	3	3		36145	NADH-ubiquinone oxidoreductase chain 1 OS=Rattus norvegicus OX=10116 GN=Mtnd1 PE=1 SV=3
77	227	tr|Q8HID1|Q8HID1_RAT	53.86	7	7	803760	3	3	3		36145	NADH-ubiquinone oxidoreductase chain 1 OS=Rattus norvegicus OX=10116 GN=Mt-nd1 PE=3 SV=1
77	228	tr|D2E6L7|D2E6L7_RAT	53.86	7	7	803760	3	3	3		36062	NADH-ubiquinone oxidoreductase chain 1 OS=Rattus norvegicus OX=10116 GN=ND1 PE=3 SV=1
93	188	O70351|HCD2_RAT	52.99	7	7	270090	2	2	3		27246	3-hydroxyacyl-CoA dehydrogenase type-2 OS=Rattus norvegicus OX=10116 GN=Hsd17b10 PE=1 SV=3
93	189	tr|B0BMW2|B0BMW2_RAT	52.99	7	7	270090	2	2	3		27250	3-hydroxyacyl-CoA dehydrogenase type-2 OS=Rattus norvegicus OX=10116 GN=Hsd17b10 PE=1 SV=1
81	250	P08011|MGST1_RAT	52.63	15	15	642850	3	3	3		17472	Microsomal glutathione S-transferase 1 OS=Rattus norvegicus OX=10116 GN=Mgst1 PE=1 SV=3
81	251	tr|B6DYQ4|B6DYQ4_RAT	52.63	15	15	642850	3	3	3		17472	Microsomal glutathione S-transferase OS=Rattus norvegicus OX=10116 GN=Mgst1 PE=2 SV=1
117	306	Q2V057|HYPDH_RAT	50.95	4	4	1305500	2	2	2		51002	Hydroxyproline dehydrogenase OS=Rattus norvegicus OX=10116 GN=Prodh2 PE=2 SV=1
92	247	P10888|COX41_RAT	50.93	12	12	388580	2	2	3		19515	Cytochrome c oxidase subunit 4 isoform 1 mitochondrial OS=Rattus norvegicus OX=10116 GN=Cox4i1 PE=1 SV=1
133	195	P49432|ODPB_RAT	50.13	3	3	58467	2	2	2		38982	Pyruvate dehydrogenase E1 component subunit beta mitochondrial OS=Rattus norvegicus OX=10116 GN=Pdhb PE=1 SV=2
133	196	tr|A0A0G2KAM3|A0A0G2KAM3_RAT	50.13	2	2	58467	2	2	2		46193	Pyruvate dehydrogenase E1 component subunit beta OS=Rattus norvegicus OX=10116 GN=Pdhb PE=1 SV=1
101	229	tr|Q06QK0|Q06QK0_RAT	49.91	4	4	348440	2	2	2		56880	Cytochrome c oxidase subunit 1 OS=Rattus norvegicus OX=10116 GN=CO1 PE=3 SV=1
101	230	tr|Q8SEZ6|Q8SEZ6_RAT	49.91	4	4	348440	2	2	2		56879	Cytochrome c oxidase subunit 1 OS=Rattus norvegicus OX=10116 GN=COI PE=3 SV=1
101	232	tr|Q8HIC9|Q8HIC9_RAT	49.91	4	4	348440	2	2	2		56845	Cytochrome c oxidase subunit 1 OS=Rattus norvegicus OX=10116 GN=Mt-co1 PE=3 SV=1
101	233	P05503|COX1_RAT	49.91	4	4	348440	2	2	2		56845	Cytochrome c oxidase subunit 1 OS=Rattus norvegicus OX=10116 GN=Mtco1 PE=2 SV=3
101	241	tr|Q06QA9|Q06QA9_RAT	49.91	4	4	348440	2	2	2		56893	Cytochrome c oxidase subunit 1 OS=Rattus norvegicus OX=10116 GN=CO1 PE=3 SV=1
101	231	tr|A0A0A1FZ34|A0A0A1FZ34_RAT	49.91	4	4	348440	2	2	2		56937	Cytochrome c oxidase subunit 1 OS=Rattus norvegicus OX=10116 GN=COX1 PE=3 SV=1
101	234	tr|Q95938|Q95938_RAT	49.91	4	4	348440	2	2	2		56977	Cytochrome c oxidase subunit 1 OS=Rattus norvegicus OX=10116 GN=Co I PE=3 SV=1
112	218	P63039|CH60_RAT	49.63	4	4	198150	2	2	2	Oxidation (M)	60956	60 kDa heat shock protein mitochondrial OS=Rattus norvegicus OX=10116 GN=Hspd1 PE=1 SV=1
112	219	tr|A0A482IDN3|A0A482IDN3_RAT	49.63	4	4	198150	2	2	2	Oxidation (M)	60956	Hsp60 OS=Rattus norvegicus OX=10116 GN=Hspd1 PE=2 SV=1
164	208	P13803|ETFA_RAT	47.83	3	3	378510	1	1	1		34951	Electron transfer flavoprotein subunit alpha mitochondrial OS=Rattus norvegicus OX=10116 GN=Etfa PE=1 SV=4
114	235	tr|B2RYW3|B2RYW3_RAT	46.63	13	13	175610	2	2	2	Oxidation (M)	21892	NADH dehydrogenase (Ubiquinone) 1 beta subcomplex 9 OS=Rattus norvegicus OX=10116 GN=Ndufb9 PE=1 SV=1
90	307	P16970|ABCD3_RAT	45.09	5	5	849580	3	3	3		75316	ATP-binding cassette sub-family D member 3 OS=Rattus norvegicus OX=10116 GN=Abcd3 PE=1 SV=3
68	322	P12075|COX5B_RAT	44.85	28	28	1114800	4	4	4		13915	Cytochrome c oxidase subunit 5B mitochondrial OS=Rattus norvegicus OX=10116 GN=Cox5b PE=1 SV=2
83	133	Q63362|NDUA5_RAT	44.2	22	22	508710	3	2	3		13412	NADH dehydrogenase [ubiquinone] 1 alpha subcomplex subunit 5 OS=Rattus norvegicus OX=10116 GN=Ndufa5 PE=1 SV=3
107	401	tr|A0A0G2K5L6|A0A0G2K5L6_RAT	42.53	1	1	0	2	2	2		275755	Acetyl-CoA carboxylase beta OS=Rattus norvegicus OX=10116 GN=Acacb PE=1 SV=1
107	327	tr|A0A0G2K1F2|A0A0G2K1F2_RAT	42.53	1	1	0	2	2	2		276393	Acetyl-CoA carboxylase beta OS=Rattus norvegicus OX=10116 GN=Acacb PE=1 SV=1
107	402	tr|O70151|O70151_RAT	42.53	1	1	0	2	2	2		276097	Acetyl-CoA carboxylase OS=Rattus norvegicus OX=10116 GN=Acacb PE=2 SV=1
107	328	tr|D3ZBE2|D3ZBE2_RAT	42.53	1	1	0	2	2	2		275967	Acetyl-CoA carboxylase beta OS=Rattus norvegicus OX=10116 GN=Acacb PE=1 SV=3
107	329	tr|E9PSQ0|E9PSQ0_RAT	42.53	1	1	0	2	2	2		276255	Acetyl-CoA carboxylase beta OS=Rattus norvegicus OX=10116 GN=Acacb PE=1 SV=2
121	146	tr|B0BMT9|B0BMT9_RAT	41.79	3	3	355840	2	1	2		50202	Sqrdl protein OS=Rattus norvegicus OX=10116 GN=Sqor PE=1 SV=1
111	436	D4A2Z8|DHX36_RAT	41.13	2	2	737520	2	1	2		113843	ATP-dependent DNA/RNA helicase DHX36 OS=Rattus norvegicus OX=10116 GN=Dhx36 PE=1 SV=1
74	482	tr|D3ZHF8|D3ZHF8_RAT	39.93	1	1	1790000	3	2	4	Formylation	73207	Translation factor GUF1 mitochondrial OS=Rattus norvegicus OX=10116 GN=Guf1 PE=1 SV=1
84	216	Q9R063|PRDX5_RAT	38.9	9	9	1102600	2	2	3		22179	Peroxiredoxin-5 mitochondrial OS=Rattus norvegicus OX=10116 GN=Prdx5 PE=1 SV=1
84	217	tr|A0A0G2JSS8|A0A0G2JSS8_RAT	38.9	9	9	1102600	2	2	3		22207	Peroxiredoxin OS=Rattus norvegicus OX=10116 GN=Prdx5 PE=1 SV=1
155	281	tr|F1LPV8|F1LPV8_RAT	38.46	2	2	164080	1	1	1		46639	Succinate--CoA ligase [GDP-forming] subunit beta mitochondrial OS=Rattus norvegicus OX=10116 GN=Suclg2 PE=1 SV=2
155	282	tr|B1H270|B1H270_RAT	38.46	2	2	164080	1	1	1		46988	Succinate--CoA ligase [GDP-forming] subunit beta mitochondrial OS=Rattus norvegicus OX=10116 GN=Suclg2 PE=2 SV=1
217	341	tr|G3V6I5|G3V6I5_RAT	37.59	3	3	184660	1	1	1		46777	DnaJ heat shock protein family (Hsp40) member A3 OS=Rattus norvegicus OX=10116 GN=Dnaja3 PE=1 SV=2
217	342	tr|Q2TVU3|Q2TVU3_RAT	37.59	3	3	184660	1	1	1		49412	TID1 OS=Rattus norvegicus OX=10116 GN=Dnaja3 PE=2 SV=1
217	343	tr|A0A0G2K4Y1|A0A0G2K4Y1_RAT	37.59	3	3	184660	1	1	1		49416	DnaJ heat shock protein family (Hsp40) member A3 OS=Rattus norvegicus OX=10116 GN=Dnaja3 PE=1 SV=1
217	344	tr|Q2UZS7|Q2UZS7_RAT	37.59	2	2	184660	1	1	1		52399	Tid-1 long isoform OS=Rattus norvegicus OX=10116 GN=Dnaja3 PE=2 SV=1
217	345	tr|A0A0G2K5E4|A0A0G2K5E4_RAT	37.59	2	2	184660	1	1	1		52403	DnaJ heat shock protein family (Hsp40) member A3 OS=Rattus norvegicus OX=10116 GN=Dnaja3 PE=1 SV=1
189	264	tr|D3ZTW8|D3ZTW8_RAT	37.32	8	8	128420	1	1	1		15823	Mitochondrial ribosomal protein L27 OS=Rattus norvegicus OX=10116 GN=Mrpl27 PE=1 SV=2
95	11746	Q9JJW3|ATPMD_RAT	36.62	21	21	821220	2	2	3		6408	ATP synthase membrane subunit DAPIT mitochondrial OS=Rattus norvegicus OX=10116 GN=Atp5md PE=1 SV=1
123	283	Q9WVK3|PECR_RAT	36.01	7	7	178350	2	2	2	Oxidation (M)	32433	Peroxisomal trans-2-enoyl-CoA reductase OS=Rattus norvegicus OX=10116 GN=Pecr PE=2 SV=1
123	284	tr|A0A0G2JVG4|A0A0G2JVG4_RAT	36.01	7	7	178350	2	2	2	Oxidation (M)	32737	Peroxisomal trans-2-enoyl-CoA reductase OS=Rattus norvegicus OX=10116 GN=Pecr PE=1 SV=1
75	555	tr|D4A1D3|D4A1D3_RAT	35.67	0	0	3066800	3	1	3		521487	Sacsin molecular chaperone OS=Rattus norvegicus OX=10116 GN=Sacs PE=1 SV=2
263	11742	P56571|ES1_RAT	35.33	4	4	135490	1	1	1		28173	ES1 protein homolog mitochondrial OS=Rattus norvegicus OX=10116 PE=1 SV=2
82	531	tr|D3ZHK4|D3ZHK4_RAT	34.97	1	1		2	0	3		182226	RB1-inducible coiled-coil 1 OS=Rattus norvegicus OX=10116 GN=Rb1cc1 PE=1 SV=1
118	318	tr|F1LM33|F1LM33_RAT	34.76	1	1		2	0	2		156679	Leucine-rich PPR motif-containing protein mitochondrial OS=Rattus norvegicus OX=10116 GN=Lrpprc PE=1 SV=2
118	319	Q5SGE0|LPPRC_RAT	34.76	1	1		2	0	2		156652	Leucine-rich PPR motif-containing protein mitochondrial OS=Rattus norvegicus OX=10116 GN=Lrpprc PE=1 SV=1
66	236	tr|Q5U2T0|Q5U2T0_RAT	34.01	4	4	0	2	1	4		44494	Death associated protein 3 OS=Rattus norvegicus OX=10116 GN=Dap3 PE=2 SV=1
66	237	tr|F7EZZ0|F7EZZ0_RAT	34.01	4	4	0	2	1	4		45112	Death-associated protein 3 OS=Rattus norvegicus OX=10116 GN=Dap3 PE=1 SV=1
66	242	tr|A0A0G2K264|A0A0G2K264_RAT	34.01	4	4	0	2	1	4		46666	Death-associated protein 3 OS=Rattus norvegicus OX=10116 GN=Dap3 PE=1 SV=1
264	244	P09139|SPYA_RAT	33.97	3	3	0	1	1	1		45834	Serine--pyruvate aminotransferase mitochondrial OS=Rattus norvegicus OX=10116 GN=Agxt PE=1 SV=1
265	5796	B1WC61|ACAD9_RAT	33.34	2	2	88451	1	1	1		68843	Complex I assembly factor ACAD9 mitochondrial OS=Rattus norvegicus OX=10116 GN=Acad9 PE=1 SV=1
266	5819	tr|B2RYU0|B2RYU0_RAT	32.86	9	9	242580	1	1	1		11842	NADH dehydrogenase (Ubiquinone) 1 beta subcomplex 2 (Predicted) isoform CRA_b OS=Rattus norvegicus OX=10116 GN=Ndufb2 PE=1 SV=1
113	517	tr|F1M4Y5|F1M4Y5_RAT	32.7	1	1	304510	2	2	2	Formylation	108218	Storkhead box 1 OS=Rattus norvegicus OX=10116 GN=Stox1 PE=4 SV=2
267	312	tr|D3ZGM1|D3ZGM1_RAT	32.68	1	1	168070	1	1	1		77891	Pentatricopeptide repeat domain 3 OS=Rattus norvegicus OX=10116 GN=Ptcd3 PE=1 SV=1
267	313	tr|A0A0G2JU15|A0A0G2JU15_RAT	32.68	1	1	168070	1	1	1		84557	Pentatricopeptide repeat domain 3 OS=Rattus norvegicus OX=10116 GN=Ptcd3 PE=1 SV=1
103	474	tr|A0A0G2JST1|A0A0G2JST1_RAT	32.67	2	2	1035800	2	2	2	Formylation	133221	Adhesion G protein-coupled receptor G6 OS=Rattus norvegicus OX=10116 GN=Adgrg6 PE=1 SV=1
173	52	tr|M0RAM5|M0RAM5_RAT	32.37	6	6	178460	1	1	1		22155	Glutathione peroxidase OS=Rattus norvegicus OX=10116 GN=Gpx1 PE=1 SV=1
173	53	P04041|GPX1_RAT	32.37	5	5	178460	1	1	1		22305	Glutathione peroxidase 1 OS=Rattus norvegicus OX=10116 GN=Gpx1 PE=1 SV=4
94	1525	Q62925|M3K1_RAT	32.14	2	2	244650	3	3	3	Oxidation (M)
268	5783	tr|Q35733|Q35733_RAT	32.1	13	13	92054	1	1	1		8389	NADH-ubiquinone oxidoreductase chain 6 (Fragment) OS=Rattus norvegicus OX=10116 PE=3 SV=1
268	5784	tr|Q06QD9|Q06QD9_RAT	32.1	6	6	92054	1	1	1		18943	NADH-ubiquinone oxidoreductase chain 6 OS=Rattus norvegicus OX=10116 GN=ND6 PE=3 SV=1
268	5785	tr|Q7HKW2|Q7HKW2_RAT	32.1	6	6	92054	1	1	1		18957	NADH-ubiquinone oxidoreductase chain 6 OS=Rattus norvegicus OX=10116 GN=NADH6 PE=3 SV=1
269	11743	P35171|CX7A2_RAT	32.05	11	11	0	1	1	1		9353	Cytochrome c oxidase subunit 7A2 mitochondrial OS=Rattus norvegicus OX=10116 GN=Cox7a2 PE=1 SV=1
269	11744	tr|B2RYS0|B2RYS0_RAT	32.05	11	11	0	1	1	1		9353	Cox7a2 protein OS=Rattus norvegicus OX=10116 GN=Cox7a2 PE=2 SV=1
270	361	P80433|COX8A_RAT	31.69	14	14	207480	1	1	1		7672	Cytochrome c oxidase subunit 8A mitochondrial OS=Rattus norvegicus OX=10116 GN=Cox8a PE=1 SV=3
271	197	tr|M0R6J0|M0R6J0_RAT	31.13	3	3	144940	1	1	1		38374	Mitochondrial ribosomal protein L39 OS=Rattus norvegicus OX=10116 GN=Mrpl39 PE=1 SV=2
129	656	tr|D3ZD23|D3ZD23_RAT	31.1	1	1	992370	2	2	2		67300	ATP-binding cassette subfamily E member 1 OS=Rattus norvegicus OX=10116 GN=Abce1 PE=1 SV=1
216	290	tr|A0A0G2JYU2|A0A0G2JYU2_RAT	30.61	4	4	294030	1	1	1		20750	Mitochondrial ribosomal protein L11 OS=Rattus norvegicus OX=10116 GN=mrpl11 PE=1 SV=1
216	291	Q5XIE3|RM11_RAT	30.61	4	4	294030	1	1	1		22420	39S ribosomal protein L11 mitochondrial OS=Rattus norvegicus OX=10116 GN=Mrpl11 PE=2 SV=1
134	414	tr|D4A4P3|D4A4P3_RAT	30.54	15	15	586050	2	2	2		11267	NADH:ubiquinone oxidoreductase subunit B3 OS=Rattus norvegicus OX=10116 GN=Ndufb3 PE=1 SV=1
218	321	tr|Q5BJZ3|Q5BJZ3_RAT	30.53	1	1	457850	1	1	1		113869	Nicotinamide nucleotide transhydrogenase OS=Rattus norvegicus OX=10116 GN=Nnt PE=1 SV=1
190	289	tr|Q5XFW4|Q5XFW4_RAT	29.56	7	7	142340	1	1	1		20541	Mitochondrial ribosomal protein L13 OS=Rattus norvegicus OX=10116 GN=Mrpl13 PE=1 SV=1
145	6514	tr|D4A3D8|D4A3D8_RAT	28.61	1	1	55147	2	1	2		104860	XPC complex subunit DNA damage recognition and repair factor OS=Rattus norvegicus OX=10116 GN=Xpc PE=1 SV=1
272	11745	P32089|TXTP_RAT	28.46	4	4	0	1	1	1		33835	Tricarboxylate transport protein mitochondrial OS=Rattus norvegicus OX=10116 GN=Slc25a1 PE=1 SV=1
127	1412	Q8CGU6|NICA_RAT	27.86	3	3	142310	2	1	2		78400	Nicastrin OS=Rattus norvegicus OX=10116 GN=Ncstn PE=1 SV=1
105	380	P11530|DMD_RAT	27.4	0	0	362550	2	2	2		425830	Dystrophin OS=Rattus norvegicus OX=10116 GN=Dmd PE=1 SV=2
119	1248	Q80ZG6|BBC3_RAT	27.12	10	10	505100	2	2	2		20718	Bcl-2-binding component 3 OS=Rattus norvegicus OX=10116 GN=Bbc3 PE=1 SV=1
64	461	tr|A0A0G2JYD4|A0A0G2JYD4_RAT	26.98	0	0	946710	2	1	4		487857	Vacuolar protein sorting 13 homolog D OS=Rattus norvegicus OX=10116 GN=Vps13d PE=1 SV=1
64	462	tr|D3ZKC6|D3ZKC6_RAT	26.98	0	0	946710	2	1	4		488962	Vacuolar protein sorting 13 homolog D OS=Rattus norvegicus OX=10116 GN=Vps13d PE=1 SV=1
274	379	tr|D3ZDP2|D3ZDP2_RAT	26.3	4	4	159050	1	1	1		23470	Mitochondrial ribosomal protein L58 OS=Rattus norvegicus OX=10116 GN=Mrpl58 PE=1 SV=1
137	562	P21575|DYN1_RAT	26.07	1	1	460190	1	1	2		97295	Dynamin-1 OS=Rattus norvegicus OX=10116 GN=Dnm1 PE=1 SV=2
275	349	Q5I0C5|FMT_RAT	25.81	2	2	0	1	1	1	Formylation	42997	Methionyl-tRNA formyltransferase mitochondrial OS=Rattus norvegicus OX=10116 GN=Mtfmt PE=2 SV=1
116	398	P48037|ANXA6_RAT	25.78	1	1	949180	1	1	2		75754	Annexin A6 OS=Rattus norvegicus OX=10116 GN=Anxa6 PE=1 SV=2
116	399	tr|Q6IMZ3|Q6IMZ3_RAT	25.78	1	1	949180	1	1	2		75756	Annexin OS=Rattus norvegicus OX=10116 GN=Anxa6 PE=1 SV=1
96	514	tr|Q5RKL4|Q5RKL4_RAT	25.52	1	1	93940	1	1	3		95977	Dimethylglycine dehydrogenase OS=Rattus norvegicus OX=10116 GN=Dmgdh PE=1 SV=1
96	515	Q63342|M2GD_RAT	25.52	1	1	93940	1	1	3		96047	Dimethylglycine dehydrogenase mitochondrial OS=Rattus norvegicus OX=10116 GN=Dmgdh PE=1 SV=1
96	516	tr|A0A0G2K9Y2|A0A0G2K9Y2_RAT	25.52	1	1	93940	1	1	3		98864	Dimethylglycine dehydrogenase mitochondrial OS=Rattus norvegicus OX=10116 GN=Dmgdh PE=1 SV=1
277	1802	tr|D3ZY44|D3ZY44_RAT	25.4	3	3	0	1	1	1		32176	Mitochondrial ribosomal protein S2 OS=Rattus norvegicus OX=10116 GN=Mrps2 PE=1 SV=1
177	520	tr|A0A0G2K1N9|A0A0G2K1N9_RAT	25.21	1	1	185210	1	1	1		74235	Selenoprotein O OS=Rattus norvegicus OX=10116 GN=Selenoo PE=1 SV=1
177	521	tr|B2GVA1|B2GVA1_RAT	25.21	1	1	185210	1	1	1		74385	Selenoprotein O OS=Rattus norvegicus OX=10116 GN=Selenoo PE=2 SV=1
131	11756	D3ZAF6|ATPK_RAT	25.19	14	14	359350	2	1	2		10452	ATP synthase subunit f mitochondrial OS=Rattus norvegicus OX=10116 GN=Atp5mf PE=1 SV=1
140	432	tr|F1LSP2|F1LSP2_RAT	25.09	1	1	42627	2	1	2		119190	Acyl-CoA dehydrogenase family member 10 OS=Rattus norvegicus OX=10116 GN=Acad10 PE=1 SV=2
279	338	Q5M9I5|QCR6_RAT	24.93	17	17	126470	1	1	1		10424	Cytochrome b-c1 complex subunit 6 mitochondrial OS=Rattus norvegicus OX=10116 GN=Uqcrh PE=3 SV=1
144	2046	tr|A0A0H2UHY0|A0A0H2UHY0_RAT	24.86	1	1	0	2	1	2		118367	Valine--tRNA ligase mitochondrial OS=Rattus norvegicus OX=10116 GN=Vars2 PE=1 SV=1
144	2047	Q6MG21|SYVM_RAT	24.86	1	1	0	2	1	2		118894	Valine--tRNA ligase mitochondrial OS=Rattus norvegicus OX=10116 GN=Vars2 PE=3 SV=1
280	1055	tr|D3ZL85|D3ZL85_RAT	24.56	4	4	331210	1	1	1		31130	Cytochrome c heme lyase OS=Rattus norvegicus OX=10116 GN=Hccs PE=1 SV=1
128	1719	Q673L6|TERT_RAT	24.25	2	2	749850	2	2	2		126934	Telomerase reverse transcriptase OS=Rattus norvegicus OX=10116 GN=Tert PE=2 SV=1
136	419	Q01062|PDE2A_RAT	23.71	2	2	958710	1	1	2		104664	cGMP-dependent 3' 5'-cyclic phosphodiesterase OS=Rattus norvegicus OX=10116 GN=Pde2a PE=1 SV=2
136	420	tr|F8WFW5|F8WFW5_RAT	23.71	1	1	958710	1	1	2		105234	Phosphodiesterase OS=Rattus norvegicus OX=10116 GN=Pde2a PE=1 SV=1
281	11749	tr|A0A0U1RRX6|A0A0U1RRX6_RAT	23.67	9	9	114580	1	1	1		10726	5-demethoxyubiquinone hydroxylase mitochondrial (Fragment) OS=Rattus norvegicus OX=10116 GN=Coq7 PE=1 SV=1
281	11750	tr|G3V879|G3V879_RAT	23.67	5	5	114580	1	1	1		20126	5-demethoxyubiquinone hydroxylase mitochondrial OS=Rattus norvegicus OX=10116 GN=Coq7 PE=1 SV=4
174	760	D3ZG52|DNA2_RAT	23.6	1	1	308410	1	1	1		119588	DNA replication ATP-dependent helicase/nuclease DNA2 OS=Rattus norvegicus OX=10116 GN=Dna2 PE=3 SV=1
174	761	tr|A0A0H2UH92|A0A0H2UH92_RAT	23.6	1	1	308410	1	1	1		136526	Graves disease carrier protein OS=Rattus norvegicus OX=10116 GN=Slc25a16 PE=1 SV=1
174	11751	P61980|HNRPK_RAT	23.6	2	2	308410	1	1	1		50976	Heterogeneous nuclear ribonucleoprotein K OS=Rattus norvegicus OX=10116 GN=Hnrnpk PE=1 SV=1
97	481	tr|D4A4K4|D4A4K4_RAT	23.29	0	0	29646	2	2	2		418626	Vacuolar protein sorting 13 homolog C OS=Rattus norvegicus OX=10116 GN=Vps13c PE=1 SV=2
109	294	Q01728|NAC1_RAT	22.99	1	1	5566300	1	1	2	Formylation	108184	Sodium/calcium exchanger 1 OS=Rattus norvegicus OX=10116 GN=Slc8a1 PE=1 SV=3
109	359	P70549|NAC3_RAT	22.99	1	1	5566300	1	1	2	Formylation	103163	Sodium/calcium exchanger 3 OS=Rattus norvegicus OX=10116 GN=Slc8a3 PE=1 SV=1
193	725	tr|F1LP30|F1LP30_RAT	22.53	1	1		1	0	1		79296	Methylcrotonoyl-CoA carboxylase subunit alpha mitochondrial OS=Rattus norvegicus OX=10116 GN=Mccc1 PE=1 SV=1
193	726	Q5I0C3|MCCA_RAT	22.53	1	1		1	0	1		79330	Methylcrotonoyl-CoA carboxylase subunit alpha mitochondrial OS=Rattus norvegicus OX=10116 GN=Mccc1 PE=1 SV=1
167	1089	tr|A0A0G2K602|A0A0G2K602_RAT	22.27	1	1	0	1	1	1		77504	MMR_HSR1 domain containing protein RGD1359460 isoform CRA_a OS=Rattus norvegicus OX=10116 GN=Noa1 PE=4 SV=1
167	1081	tr|Q5XHZ7|Q5XHZ7_RAT	22.27	1	1	0	1	1	1		66660	MMR_HSR1 domain containing protein RGD1359460 OS=Rattus norvegicus OX=10116 GN=Noa1 PE=2 SV=1
167	1082	tr|A0A0G2JUI4|A0A0G2JUI4_RAT	22.27	1	1	0	1	1	1		66708	Nitric oxide-associated 1 OS=Rattus norvegicus OX=10116 GN=Noa1 PE=4 SV=1
157	1405	tr|A0A0H2UHV7|A0A0H2UHV7_RAT	22.02	1	1	0	1	1	1		99265	Alanine--tRNA ligase mitochondrial OS=Rattus norvegicus OX=10116 GN=Aars2 PE=1 SV=1
157	1414	D3ZX08|SYAM_RAT	22.02	1	1	0	1	1	1		107806	Alanine--tRNA ligase mitochondrial OS=Rattus norvegicus OX=10116 GN=Aars2 PE=3 SV=1
284	872	Q5FWU3|ATG9A_RAT	21.26	1	1	39781	1	1	1	Oxidation (M)	94488	Autophagy-related protein 9A OS=Rattus norvegicus OX=10116 GN=Atg9a PE=1 SV=1
70	599	Q00918|LTBP1_RAT	21.03	1	1	2146100	1	1	4	Carbamidomethylation	186598	Latent-transforming growth factor beta-binding protein 1 OS=Rattus norvegicus OX=10116 GN=Ltbp1 PE=1 SV=1
148	593	P15205|MAP1B_RAT	20.91	0	0		1	0	1		269640	Microtubule-associated protein 1B OS=Rattus norvegicus OX=10116 GN=Map1b PE=1 SV=3
182	6206	tr|B5DFK5|B5DFK5_RAT	20.91	0	0		1	0	1		119424	Hip1r protein OS=Rattus norvegicus OX=10116 GN=Hip1r PE=2 SV=1
182	6207	tr|F1LML7|F1LML7_RAT	20.91	0	0		1	0	1		119553	Huntingtin-interacting protein 1-related OS=Rattus norvegicus OX=10116 GN=Hip1r PE=1 SV=1
182	6221	tr|Q99PW9|Q99PW9_RAT	20.91	0	0		1	0	1		120572	Huntingtin interacting protein 1 related (Fragment) OS=Rattus norvegicus OX=10116 GN=Hip1r PE=2 SV=1
286	5893	tr|F1LP46|F1LP46_RAT	20.68	1	1	186730	1	1	1		78923	ATP-dependent RNA helicase SUPV3L1 mitochondrial OS=Rattus norvegicus OX=10116 GN=Supv3l1 PE=1 SV=2
286	5894	tr|A0A0G2K9R3|A0A0G2K9R3_RAT	20.68	1	1	186730	1	1	1		84180	ATP-dependent RNA helicase SUPV3L1 mitochondrial OS=Rattus norvegicus OX=10116 GN=Supv3l1 PE=1 SV=1
286	5895	Q5EBA1|SUV3_RAT	20.68	1	1	186730	1	1	1		86706	ATP-dependent RNA helicase SUPV3L1 mitochondrial OS=Rattus norvegicus OX=10116 GN=Supv3l1 PE=2 SV=1
191	683	O88658|KIF1B_RAT	20.68	0	0	677090	1	1	1		204169	Kinesin-like protein KIF1B OS=Rattus norvegicus OX=10116 GN=Kif1b PE=1 SV=2

## Sheet: Monomer
Protein Group	Protein ID	Accession	-10lgP	Coverage (%)	Coverage (%) Sample 7	Area Sample 7	#Peptides	#Unique	#Spec Sample 7	PTM	Avg. Mass	Description
2	8	P10719|ATPB_RAT	405.85	71	71	4984200000	241	233	875	Oxidation (M)
2	9	tr|G3V6D3|G3V6D3_RAT	405.85	71	71	4984200000	241	233	875	Oxidation (M)
1	10	P15999|ATPA_RAT	367.07	63	63	3881700000	248	237	1140	Carbamidomethylation
1	11	tr|F1LP05|F1LP05_RAT	367.07	63	63	3881700000	248	237	1140	Carbamidomethylation
4	119	P31399|ATP5H_RAT	349.97	82	82	649670000	87	87	194	Carbamidomethylation
3	30	P52873|PYC_RAT	337.26	43	43	412230000	164	159	292	Oxidation (M)		Pyruvate carboxylase, mitochondrial
3	31	tr|A0A0G2JTL5|A0A0G2JTL5_RAT	337.26	39	39	412230000	164	159	292	Oxidation (M)
6	64	P35435|ATPG_RAT	305.24	53	53	529720000	80	80	182	Carbamidomethylation		ATP synthase subunit gamma, mitochondrial
6	63	tr|Q6QI09|Q6QI09_RAT	305.24	24	24	529720000	80	80	182	Carbamidomethylation
8	1	P10860|DHE3_RAT	293.87	41	41	117940000	66	66	107	Oxidation (M)	61416	Glutamate dehydrogenase 1 mitochondrial OS=Rattus norvegicus OX=10116 GN=Glud1 PE=1 SV=2
19	171	tr|D3ZFJ6|D3ZFJ6_RAT	266.34	25	25	19637000	26	26	32		60420	Lactamase beta OS=Rattus norvegicus OX=10116 GN=Lactb PE=1 SV=1
9	4	P07756|CPSM_RAT	256.7	26	26	75030000	74	71	98	Carbamidomethylation		Carbamoyl-phosphate synthase [ammonia], mitochondrial
5	246	P19511|AT5F1_RAT	238.91	48	48	609920000	59	58	189	Formylation	28869	ATP synthase F(0) complex subunit B1 mitochondrial OS=Rattus norvegicus OX=10116 GN=Atp5pb PE=1 SV=1
12	26	P00507|AATM_RAT	237.65	36	36	76425000	40	39	58	Oxidation (M)	47314	Aspartate aminotransferase mitochondrial OS=Rattus norvegicus OX=10116 GN=Got2 PE=1 SV=2
7	5802	Q06647|ATPO_RAT	236.85	54	54	264280000	63	61	124	Carbamidomethylation		ATP synthase subunit O, mitochondrial
15	5817	P21571|ATP5J_RAT	234.2	58	58	45502000	29	28	45	Oxidation (M)		ATP synthase-coupling factor 6, mitochondrial
10	1646	Q6PDU7|ATP5L_RAT	228.57	50	50	258730000	38	38	94	Oxidation (M)	11433	ATP synthase subunit g mitochondrial OS=Rattus norvegicus OX=10116 GN=Atp5mg PE=1 SV=2
11	350	tr|G3V7Y3|G3V7Y3_RAT	213.55	48	48	191490000	26	26	63	Oxidation (M)	17563	ATP synthase subunit delta mitochondrial OS=Rattus norvegicus OX=10116 GN=Atp5f1d PE=1 SV=1
14	45	P04762|CATA_RAT	211.13	27	27	49049000	30	30	46		59757	Catalase OS=Rattus norvegicus OX=10116 GN=Cat PE=1 SV=3
20	218	P63039|CH60_RAT	193.69	24	24	18788000	25	25	29	Oxidation (M)	60956	60 kDa heat shock protein mitochondrial OS=Rattus norvegicus OX=10116 GN=Hspd1 PE=1 SV=1
20	219	tr|A0A482IDN3|A0A482IDN3_RAT	193.69	24	24	18788000	25	25	29	Oxidation (M)	60956	Hsp60 OS=Rattus norvegicus OX=10116 GN=Hspd1 PE=2 SV=1
18	27	Q60587|ECHB_RAT	190.48	27	27	23004000	25	25	33		51414	Trifunctional enzyme subunit beta mitochondrial OS=Rattus norvegicus OX=10116 GN=Hadhb PE=1 SV=1
16	24	Q64428|ECHA_RAT	185.48	16	16	22114000	20	20	35	Carbamidomethylation	82665	Trifunctional enzyme subunit alpha mitochondrial OS=Rattus norvegicus OX=10116 GN=Hadha PE=1 SV=2
22	23	P22791|HMCS2_RAT	176.62	23	23	12334000	21	21	27		56912	Hydroxymethylglutaryl-CoA synthase mitochondrial OS=Rattus norvegicus OX=10116 GN=Hmgcs2 PE=1 SV=1
22	22	tr|Q68G44|Q68G44_RAT	176.62	23	23	12334000	21	21	27		56886	3-hydroxy-3-methylglutaryl coenzyme A synthase OS=Rattus norvegicus OX=10116 GN=Hmgcs2 PE=1 SV=1
30	136	P24329|THTR_RAT	171.16	18	18	4648500	7	7	9		33407	Thiosulfate sulfurtransferase OS=Rattus norvegicus OX=10116 GN=Tst PE=1 SV=3
17	352	P0C2X9|AL4A1_RAT	165.56	23	23	15863000	26	26	34	Oxidation (M)	61869	Delta-1-pyrroline-5-carboxylate dehydrogenase mitochondrial OS=Rattus norvegicus OX=10116 GN=Aldh4a1 PE=1 SV=1
24	54	P18163|ACSL1_RAT	158.35	15	15	15270000	17	17	21	Formylation	78179	Long-chain-fatty-acid--CoA ligase 1 OS=Rattus norvegicus OX=10116 GN=Acsl1 PE=1 SV=1
25	50	Q02253|MMSA_RAT	156.3	12	12	8452300	13	13	16	Oxidation (M)	57808	Methylmalonate-semialdehyde dehydrogenase [acylating] mitochondrial OS=Rattus norvegicus OX=10116 GN=Aldh6a1 PE=1 SV=1
25	51	tr|G3V7J0|G3V7J0_RAT	156.3	12	12	8452300	13	13	16	Oxidation (M)	57748	Aldehyde dehydrogenase family 6 subfamily A1 isoform CRA_b OS=Rattus norvegicus OX=10116 GN=Aldh6a1 PE=1 SV=1
13	11740	P29419|ATP5I_RAT	155.85	73	73	66111000	28	26	56		8255	ATP synthase subunit e mitochondrial OS=Rattus norvegicus OX=10116 GN=Atp5me PE=1 SV=3
36	201	P45953|ACADV_RAT	151.85	9	9	1191300	6	6	6		70749	Very long-chain specific acyl-CoA dehydrogenase mitochondrial OS=Rattus norvegicus OX=10116 GN=Acadvl PE=1 SV=1
36	202	tr|Q5M9H2|Q5M9H2_RAT	151.85	9	9	1191300	6	6	6		70821	Acyl-Coenzyme A dehydrogenase very long chain OS=Rattus norvegicus OX=10116 GN=Acadvl PE=1 SV=1
26	35	P17764|THIL_RAT	142.6	15	15	9929300	10	10	16		44695	Acetyl-CoA acetyltransferase mitochondrial OS=Rattus norvegicus OX=10116 GN=Acat1 PE=1 SV=1
27	46	P13086|SUCA_RAT	141.11	17	17	4117900	12	12	16	Formylation	36148	Succinate--CoA ligase [ADP/GDP-forming] subunit alpha mitochondrial OS=Rattus norvegicus OX=10116 GN=Suclg1 PE=2 SV=2
27	47	tr|A0A0H2UHE1|A0A0H2UHE1_RAT	141.11	16	16	4117900	12	12	16	Formylation	37560	Succinate--CoA ligase [ADP/GDP-forming] subunit alpha mitochondrial OS=Rattus norvegicus OX=10116 GN=Suclg1 PE=1 SV=1
34	742	A2VCW9|AASS_RAT	139.69	8	8	1971600	7	7	7	Carbamidomethylation	102908	Alpha-aminoadipic semialdehyde synthase mitochondrial OS=Rattus norvegicus OX=10116 GN=Aass PE=2 SV=1
23	1095	tr|Q5UAJ5|Q5UAJ5_RAT	135.59	69	69	93080000	10	10	22	Oxidation (M)	7642	ATP synthase protein 8 OS=Rattus norvegicus OX=10116 GN=ATP8 PE=3 SV=1
23	1097	tr|Q8SEZ4|Q8SEZ4_RAT	135.59	69	69	93080000	10	10	22	Oxidation (M)	7632	ATP synthase protein 8 OS=Rattus norvegicus OX=10116 GN=ATPase8 PE=3 SV=1
72	277	tr|B2RZ24|B2RZ24_RAT	128.18	5	5	505690	3	3	3		47388	Succinate-CoA ligase subunit beta (Fragment) OS=Rattus norvegicus OX=10116 GN=Sucla2 PE=2 SV=1
72	278	tr|F1LM47|F1LM47_RAT	128.18	5	5	505690	3	3	3		50306	Succinate--CoA ligase [ADP-forming] subunit beta mitochondrial OS=Rattus norvegicus OX=10116 GN=Sucla2 PE=1 SV=1
48	42	P20788|UCRI_RAT	125.14	10	10	2138000	4	4	5	Formylation	29446	Cytochrome b-c1 complex subunit Rieske mitochondrial OS=Rattus norvegicus OX=10116 GN=Uqcrfs1 PE=1 SV=2
39	28533	P26772|CH10_RAT	122.56	38	38	1075300	6	6	6	Oxidation (M)		10 kDa heat shock protein, mitochondrial
33	11785	B3DMA2|ACD11_RAT	113.7	8	8	3550200	7	7	8		87371	Acyl-CoA dehydrogenase family member 11 OS=Rattus norvegicus OX=10116 GN=Acad11 PE=1 SV=1
35	207	tr|G3V6I4|G3V6I4_RAT	112.27	8	8	1568500	4	4	7		37791	Mitochondrial amidoxime reducing component 1 OS=Rattus norvegicus OX=10116 GN=Marc1 PE=1 SV=1
21	690	P05504|ATP6_RAT	108.74	38	38	23215000	18	16	27	Oxidation (M)		ATP synthase subunit a
21	691	tr|Q8HIC7|Q8HIC7_RAT	108.74	38	38	23215000	18	16	27	Oxidation (M)
21	692	tr|S5S1E9|S5S1E9_RAT	108.74	38	38	23215000	18	16	27	Oxidation (M)
45	38	tr|D3ZFQ8|D3ZFQ8_RAT	105.46	6	6	3108200	3	3	5		35435	Cytochrome c-1 OS=Rattus norvegicus OX=10116 GN=Cyc1 PE=1 SV=3
29	21	P32551|QCR2_RAT	104.27	5	5	4669900	6	6	11		48396	Cytochrome b-c1 complex subunit 2 mitochondrial OS=Rattus norvegicus OX=10116 GN=Uqcrc2 PE=1 SV=2
31	11746	Q9JJW3|ATPMD_RAT	103.21	43	43	12166000	6	6	9		6408	ATP synthase membrane subunit DAPIT mitochondrial OS=Rattus norvegicus OX=10116 GN=Atp5md PE=1 SV=1
49	68	tr|A0A140GE10|A0A140GE10_RAT	102.62	10	10	955560	4	4	5		42574	Cytochrome b (Fragment) OS=Rattus norvegicus OX=10116 PE=3 SV=1
49	69	tr|A0A140GE11|A0A140GE11_RAT	102.62	10	10	955560	4	4	5		42588	Cytochrome b (Fragment) OS=Rattus norvegicus OX=10116 PE=3 SV=1
49	70	tr|A0A140GE08|A0A140GE08_RAT	102.62	10	10	955560	4	4	5		42527	Cytochrome b (Fragment) OS=Rattus norvegicus OX=10116 PE=3 SV=1
49	92	tr|A0A0S1Z1V9|A0A0S1Z1V9_RAT	102.62	9	9	955560	4	4	5		43002	Cytochrome b OS=Rattus norvegicus OX=10116 GN=CYTB PE=3 SV=1
49	95	tr|A0A0S1Z1V4|A0A0S1Z1V4_RAT	102.62	9	9	955560	4	4	5		43016	Cytochrome b OS=Rattus norvegicus OX=10116 GN=CYTB PE=3 SV=1
49	72	tr|A0A3Q8AC68|A0A3Q8AC68_RAT	102.62	10	10	955560	4	4	5		42622	Cytochrome b (Fragment) OS=Rattus norvegicus OX=10116 GN=Cytb PE=3 SV=1
49	120	tr|A0A411P2I9|A0A411P2I9_RAT	102.62	10	10	955560	4	4	5		40144	Cytochrome b (Fragment) OS=Rattus norvegicus OX=10116 GN=Cytb PE=3 SV=1
49	132	tr|A0A0U2IDR8|A0A0U2IDR8_RAT	102.62	10	10	955560	4	4	5		40981	Cytochrome b (Fragment) OS=Rattus norvegicus OX=10116 PE=3 SV=1
49	122	tr|A0A411P2L0|A0A411P2L0_RAT	102.62	10	10	955560	4	4	5		41017	Cytochrome b (Fragment) OS=Rattus norvegicus OX=10116 GN=Cytb PE=3 SV=1
49	121	tr|A0A0U2M179|A0A0U2M179_RAT	102.62	10	10	955560	4	4	5		41037	Cytochrome b (Fragment) OS=Rattus norvegicus OX=10116 PE=3 SV=1
49	123	tr|F8QU31|F8QU31_RAT	102.62	10	10	955560	4	4	5		42181	Cytochrome b (Fragment) OS=Rattus norvegicus OX=10116 GN=cytb PE=3 SV=1
49	124	tr|A0A411P2K0|A0A411P2K0_RAT	102.62	10	10	955560	4	4	5		42238	Cytochrome b (Fragment) OS=Rattus norvegicus OX=10116 GN=Cytb PE=3 SV=1
49	67	tr|L0L4L8|L0L4L8_RAT	102.62	10	10	955560	4	4	5		42470	Cytochrome b (Fragment) OS=Rattus norvegicus OX=10116 GN=cytb PE=3 SV=1
49	125	tr|A0A385HCC9|A0A385HCC9_RAT	102.62	10	10	955560	4	4	5		42766	Cytochrome b (Fragment) OS=Rattus norvegicus OX=10116 PE=3 SV=1
49	71	tr|A0A3Q8AGE8|A0A3Q8AGE8_RAT	102.62	10	10	955560	4	4	5		42712	Cytochrome b (Fragment) OS=Rattus norvegicus OX=10116 GN=Cytb PE=3 SV=1
49	73	tr|A0A3S6FK13|A0A3S6FK13_RAT	102.62	10	10	955560	4	4	5		42702	Cytochrome b (Fragment) OS=Rattus norvegicus OX=10116 GN=Cytb PE=3 SV=1
49	74	tr|A0A3S6FM15|A0A3S6FM15_RAT	102.62	10	10	955560	4	4	5		42698	Cytochrome b (Fragment) OS=Rattus norvegicus OX=10116 GN=Cytb PE=3 SV=1
49	80	tr|D6NSR3|D6NSR3_RAT	102.62	9	9	955560	4	4	5		42986	Cytochrome b (Fragment) OS=Rattus norvegicus OX=10116 GN=cytb PE=3 SV=1
49	81	tr|D6NSQ8|D6NSQ8_RAT	102.62	9	9	955560	4	4	5		43016	Cytochrome b (Fragment) OS=Rattus norvegicus OX=10116 GN=cytb PE=3 SV=1
49	82	tr|D6NSR8|D6NSR8_RAT	102.62	9	9	955560	4	4	5		42998	Cytochrome b (Fragment) OS=Rattus norvegicus OX=10116 GN=cytb PE=3 SV=1
49	103	tr|F8QU37|F8QU37_RAT	102.62	9	9	955560	4	4	5		42992	Cytochrome b (Fragment) OS=Rattus norvegicus OX=10116 GN=cytb PE=3 SV=1
49	86	tr|Q8SEY9|Q8SEY9_RAT	102.62	9	9	955560	4	4	5		43015	Cytochrome b OS=Rattus norvegicus OX=10116 GN=cytb PE=3 SV=1
49	87	tr|D6NSR7|D6NSR7_RAT	102.62	9	9	955560	4	4	5		42982	Cytochrome b (Fragment) OS=Rattus norvegicus OX=10116 GN=cytb PE=3 SV=1
49	89	tr|F2Q6S5|F2Q6S5_RAT	102.62	9	9	955560	4	4	5		42952	Cytochrome b (Fragment) OS=Rattus norvegicus OX=10116 GN=cytb PE=3 SV=1
49	90	tr|D6NSQ6|D6NSQ6_RAT	102.62	9	9	955560	4	4	5		42952	Cytochrome b (Fragment) OS=Rattus norvegicus OX=10116 GN=cytb PE=3 SV=1
49	116	tr|D6NSQ0|D6NSQ0_RAT	102.62	9	9	955560	4	4	5		42968	Cytochrome b (Fragment) OS=Rattus norvegicus OX=10116 GN=cytb PE=3 SV=1
49	91	tr|Q5UAI7|Q5UAI7_RAT	102.62	9	9	955560	4	4	5		42998	Cytochrome b OS=Rattus norvegicus OX=10116 GN=CYTB PE=3 SV=1
49	129	tr|D6NSR1|D6NSR1_RAT	102.62	9	9	955560	4	4	5		43002	Cytochrome b (Fragment) OS=Rattus norvegicus OX=10116 GN=cytb PE=3 SV=1
49	93	tr|Q8HIC4|Q8HIC4_RAT	102.62	9	9	955560	4	4	5		43012	Cytochrome b OS=Rattus norvegicus OX=10116 GN=Mt-cyb PE=3 SV=1
49	97	P00159|CYB_RAT	102.62	9	9	955560	4	4	5		43012	Cytochrome b OS=Rattus norvegicus OX=10116 GN=Mt-Cyb PE=3 SV=3
49	99	tr|A0A220DA28|A0A220DA28_RAT	102.62	9	9	955560	4	4	5		42970	Cytochrome b OS=Rattus norvegicus OX=10116 PE=3 SV=1
49	100	tr|H2KXA0|H2KXA0_RAT	102.62	9	9	955560	4	4	5		42978	Cytochrome b (Fragment) OS=Rattus norvegicus OX=10116 GN=cytb PE=3 SV=1
49	101	tr|A0A096XNM4|A0A096XNM4_RAT	102.62	9	9	955560	4	4	5		43042	Cytochrome b (Fragment) OS=Rattus norvegicus OX=10116 PE=3 SV=1
49	76	tr|A0A220D9Z6|A0A220D9Z6_RAT	102.62	9	9	955560	4	4	5		43018	Cytochrome b OS=Rattus norvegicus OX=10116 PE=3 SV=1
49	77	tr|D6NSP2|D6NSP2_RAT	102.62	9	9	955560	4	4	5		42945	Cytochrome b (Fragment) OS=Rattus norvegicus OX=10116 GN=cytb PE=3 SV=1
49	78	tr|D6NSS6|D6NSS6_RAT	102.62	9	9	955560	4	4	5		42993	Cytochrome b (Fragment) OS=Rattus norvegicus OX=10116 GN=cytb PE=3 SV=1
49	79	tr|D6NSQ3|D6NSQ3_RAT	102.62	9	9	955560	4	4	5		43012	Cytochrome b (Fragment) OS=Rattus norvegicus OX=10116 GN=cytb PE=3 SV=1
49	127	tr|D6NSP4|D6NSP4_RAT	102.62	9	9	955560	4	4	5		43016	Cytochrome b (Fragment) OS=Rattus norvegicus OX=10116 GN=cytb PE=3 SV=1
49	83	tr|F2Q6S6|F2Q6S6_RAT	102.62	9	9	955560	4	4	5		42938	Cytochrome b (Fragment) OS=Rattus norvegicus OX=10116 GN=cytb PE=3 SV=1
49	84	tr|A0A0A1FZ42|A0A0A1FZ42_RAT	102.62	9	9	955560	4	4	5		42989	Cytochrome b OS=Rattus norvegicus OX=10116 GN=CYTB PE=3 SV=1
49	85	tr|D6NSS7|D6NSS7_RAT	102.62	9	9	955560	4	4	5		42948	Cytochrome b (Fragment) OS=Rattus norvegicus OX=10116 GN=cytb PE=3 SV=1
49	88	tr|A0A220DA44|A0A220DA44_RAT	102.62	9	9	955560	4	4	5		42968	Cytochrome b OS=Rattus norvegicus OX=10116 PE=3 SV=1
49	128	tr|D6NSR2|D6NSR2_RAT	102.62	9	9	955560	4	4	5		43073	Cytochrome b (Fragment) OS=Rattus norvegicus OX=10116 GN=cytb PE=3 SV=1
49	94	tr|A0A220DA02|A0A220DA02_RAT	102.62	9	9	955560	4	4	5		42968	Cytochrome b OS=Rattus norvegicus OX=10116 PE=3 SV=1
49	96	tr|R9TKN1|R9TKN1_RAT	102.62	9	9	955560	4	4	5		43012	Cytochrome b OS=Rattus norvegicus OX=10116 GN=CYTB PE=3 SV=1
49	98	tr|L0N311|L0N311_RAT	102.62	9	9	955560	4	4	5		43045	Cytochrome b (Fragment) OS=Rattus norvegicus OX=10116 GN=cytb PE=3 SV=1
49	102	tr|D6NSP5|D6NSP5_RAT	102.62	9	9	955560	4	4	5		43012	Cytochrome b (Fragment) OS=Rattus norvegicus OX=10116 GN=cytb PE=3 SV=1
44	189	tr|B0BMW2|B0BMW2_RAT	98.87	13	13	1974900	5	5	5		27250	3-hydroxyacyl-CoA dehydrogenase type-2 OS=Rattus norvegicus OX=10116 GN=Hsd17b10 PE=1 SV=1
44	188	O70351|HCD2_RAT	98.87	13	13	1974900	5	5	5		27246	3-hydroxyacyl-CoA dehydrogenase type-2 OS=Rattus norvegicus OX=10116 GN=Hsd17b10 PE=1 SV=3
50	3	P85834|EFTU_RAT	94.86	7	7	1443200	4	4	5		49522	Elongation factor Tu mitochondrial OS=Rattus norvegicus OX=10116 GN=Tufm PE=1 SV=1
107	44	P11240|COX5A_RAT	90.83	17	17	529460	2	2	2		16130	Cytochrome c oxidase subunit 5A mitochondrial OS=Rattus norvegicus OX=10116 GN=Cox5a PE=1 SV=1
61	5862	tr|G3V7I0|G3V7I0_RAT	84.56	9	9	2073500	3	3	4		28299	Peroxiredoxin 3 OS=Rattus norvegicus OX=10116 GN=Prdx3 PE=1 SV=1
61	5863	Q9Z0V6|PRDX3_RAT	84.56	9	9	2073500	3	3	4		28295	Thioredoxin-dependent peroxide reductase mitochondrial OS=Rattus norvegicus OX=10116 GN=Prdx3 PE=1 SV=2
57	16	Q68FY0|QCR1_RAT	82.22	7	7	1499600	4	4	4		52849	Cytochrome b-c1 complex subunit 1 mitochondrial OS=Rattus norvegicus OX=10116 GN=Uqcrc1 PE=1 SV=1
40	297	Q924S5|LONM_RAT	81.14	3	3	1173100	4	4	6		105792	Lon protease homolog mitochondrial OS=Rattus norvegicus OX=10116 GN=Lonp1 PE=2 SV=1
28	11756	D3ZAF6|ATPK_RAT	77.21	30	30	20049000	8	7	15	Oxidation (M)	10452	ATP synthase subunit f mitochondrial OS=Rattus norvegicus OX=10116 GN=Atp5mf PE=1 SV=1
32	6375	tr|D3ZTP0|D3ZTP0_RAT	76.77	6	6	2779100	6	6	8		101806	10-formyltetrahydrofolate dehydrogenase OS=Rattus norvegicus OX=10116 GN=Aldh1l2 PE=1 SV=3
78	34377	P19804|NDKB_RAT	74.8	15	15	793250	2	2	3	Formylation	17283	Nucleoside diphosphate kinase B OS=Rattus norvegicus OX=10116 GN=Nme2 PE=1 SV=1
90	115	tr|A0A0G2JVH4|A0A0G2JVH4_RAT	74.63	2	2	1524400	2	2	2		86230	MICOS complex subunit MIC60 OS=Rattus norvegicus OX=10116 GN=Immt PE=1 SV=1
90	109	tr|A0A140TAG5|A0A140TAG5_RAT	74.63	3	3	1524400	2	2	2		67049	MICOS complex subunit MIC60 OS=Rattus norvegicus OX=10116 GN=Immt PE=1 SV=1
90	110	Q3KR86|MIC60_RAT	74.63	3	3	1524400	2	2	2		67177	MICOS complex subunit Mic60 (Fragment) OS=Rattus norvegicus OX=10116 GN=Immt PE=1 SV=1
47	5804	tr|A0A0G2K401|A0A0G2K401_RAT	72.95	2	2	135810	4	1	5		79812	Propionyl-CoA carboxylase alpha chain mitochondrial OS=Rattus norvegicus OX=10116 GN=Pcca PE=1 SV=1
47	5805	tr|A0A0G2K5P9|A0A0G2K5P9_RAT	72.95	2	2	135810	4	1	5		81413	Propionyl-CoA carboxylase alpha chain mitochondrial OS=Rattus norvegicus OX=10116 GN=Pcca PE=1 SV=1
47	5806	P14882|PCCA_RAT	72.95	2	2	135810	4	1	5		81623	Propionyl-CoA carboxylase alpha chain mitochondrial OS=Rattus norvegicus OX=10116 GN=Pcca PE=1 SV=3
67	240	A0A0G2K047|ACSS3_RAT	72.24	3	3	152110	2	2	3		74675	Acyl-CoA synthetase short-chain family member 3 mitochondrial OS=Rattus norvegicus OX=10116 GN=Acss3 PE=1 SV=1
38	251	tr|B6DYQ4|B6DYQ4_RAT	71.07	15	15	1101000	5	5	6		17472	Microsomal glutathione S-transferase OS=Rattus norvegicus OX=10116 GN=Mgst1 PE=2 SV=1
38	250	P08011|MGST1_RAT	71.07	15	15	1101000	5	5	6		17472	Microsomal glutathione S-transferase 1 OS=Rattus norvegicus OX=10116 GN=Mgst1 PE=1 SV=3
83	143	tr|Q5EBA4|Q5EBA4_RAT	70.7	8	8	440100	2	2	3	Oxidation (M)	33215	Nipsnap1 protein (Fragment) OS=Rattus norvegicus OX=10116 GN=Nipsnap1 PE=2 SV=1
83	144	tr|G3V728|G3V728_RAT	70.7	8	8	440100	2	2	3	Oxidation (M)	33346	4-nitrophenylphosphatase domain and non-neuronal SNAP25-like protein homolog 1 (C. elegans) isoform CRA_b OS=Rattus norvegicus OX=10116 GN=Nipsnap1 PE=1 SV=1
236	11743	P35171|CX7A2_RAT	65.29	14	14	311870	1	1	1		9353	Cytochrome c oxidase subunit 7A2 mitochondrial OS=Rattus norvegicus OX=10116 GN=Cox7a2 PE=1 SV=1
236	11744	tr|B2RYS0|B2RYS0_RAT	65.29	14	14	311870	1	1	1		9353	Cox7a2 protein OS=Rattus norvegicus OX=10116 GN=Cox7a2 PE=2 SV=1
76	1322	P32198|CPT1A_RAT	62.37	3	3	169930	2	2	3		88126	Carnitine O-palmitoyltransferase 1 liver isoform OS=Rattus norvegicus OX=10116 GN=Cpt1a PE=1 SV=2
41	446	Q91XJ1|BECN1_RAT	58.57	3	3		3	0	6		51557	Beclin-1 OS=Rattus norvegicus OX=10116 GN=Becn1 PE=1 SV=1
70	52	tr|M0RAM5|M0RAM5_RAT	56.38	13	13	442220	3	3	3		22155	Glutathione peroxidase OS=Rattus norvegicus OX=10116 GN=Gpx1 PE=1 SV=1
70	53	P04041|GPX1_RAT	56.38	13	13	442220	3	3	3		22305	Glutathione peroxidase 1 OS=Rattus norvegicus OX=10116 GN=Gpx1 PE=1 SV=4
52	283	Q9WVK3|PECR_RAT	55.65	13	13	389320	4	3	5	Oxidation (M)	32433	Peroxisomal trans-2-enoyl-CoA reductase OS=Rattus norvegicus OX=10116 GN=Pecr PE=2 SV=1
52	284	tr|A0A0G2JVG4|A0A0G2JVG4_RAT	55.65	13	13	389320	4	3	5	Oxidation (M)	32737	Peroxisomal trans-2-enoyl-CoA reductase OS=Rattus norvegicus OX=10116 GN=Pecr PE=1 SV=1
95	321	tr|Q5BJZ3|Q5BJZ3_RAT	55.11	2	2	480580	2	2	2		113869	Nicotinamide nucleotide transhydrogenase OS=Rattus norvegicus OX=10116 GN=Nnt PE=1 SV=1
60	34376	D3Z9R8|ATP68_RAT	51.97	32	32	306390	3	2	4	Oxidation (M)	6914	ATP synthase subunit ATP5MPL mitochondrial OS=Rattus norvegicus OX=10116 GN=Atp5mpl PE=1 SV=1
79	294	Q01728|NAC1_RAT	51.52	2	2	6235600	3	1	3	Formylation	108184	Sodium/calcium exchanger 1 OS=Rattus norvegicus OX=10116 GN=Slc8a1 PE=1 SV=3
202	725	tr|F1LP30|F1LP30_RAT	51.4	2	2	187330	1	1	1		79296	Methylcrotonoyl-CoA carboxylase subunit alpha mitochondrial OS=Rattus norvegicus OX=10116 GN=Mccc1 PE=1 SV=1
202	726	Q5I0C3|MCCA_RAT	51.4	2	2	187330	1	1	1		79330	Methylcrotonoyl-CoA carboxylase subunit alpha mitochondrial OS=Rattus norvegicus OX=10116 GN=Mccc1 PE=1 SV=1
159	208	P13803|ETFA_RAT	49.5	3	3	218780	1	1	1		34951	Electron transfer flavoprotein subunit alpha mitochondrial OS=Rattus norvegicus OX=10116 GN=Etfa PE=1 SV=4
200	287	tr|D3ZX69|D3ZX69_RAT	47.83	5	5	0	1	1	1		29466	39S ribosomal protein L10 mitochondrial OS=Rattus norvegicus OX=10116 GN=Mrpl10 PE=1 SV=1
200	223	P0C2C4|RM10_RAT	47.83	5	5	0	1	1	1		29940	39S ribosomal protein L10 mitochondrial OS=Rattus norvegicus OX=10116 GN=Mrpl10 PE=1 SV=1
65	1178	tr|G3V9J8|G3V9J8_RAT	47.36	3	3	1162400	2	2	3	Formylation	87521	Glycerol-3-phosphate acyltransferase 1 mitochondrial OS=Rattus norvegicus OX=10116 GN=Gpam PE=1 SV=2
65	1180	P97564|GPAT1_RAT	47.36	3	3	1162400	2	2	3	Formylation	93715	Glycerol-3-phosphate acyltransferase 1 mitochondrial OS=Rattus norvegicus OX=10116 GN=Gpam PE=1 SV=3
65	1179	tr|A0A0G2K2U7|A0A0G2K2U7_RAT	47.36	3	3	1162400	2	2	3	Formylation	93728	Glycerol-3-phosphate acyltransferase 1 mitochondrial OS=Rattus norvegicus OX=10116 GN=Gpam PE=1 SV=1
237	17425	tr|A0A0G2JYE8|A0A0G2JYE8_RAT	47.29	6	6	384930	1	1	1		20804	Serine--pyruvate aminotransferase mitochondrial OS=Rattus norvegicus OX=10116 GN=Agxt PE=1 SV=1
237	244	P09139|SPYA_RAT	47.29	3	3	384930	1	1	1		45834	Serine--pyruvate aminotransferase mitochondrial OS=Rattus norvegicus OX=10116 GN=Agxt PE=1 SV=1
123	369	tr|G3V734|G3V734_RAT	46.27	3	3	225320	2	1	2		36133	2 4-dienoyl CoA reductase 1 mitochondrial isoform CRA_a OS=Rattus norvegicus OX=10116 GN=Decr1 PE=1 SV=1
123	370	Q64591|DECR_RAT	46.27	3	3	225320	2	1	2		36133	2 4-dienoyl-CoA reductase mitochondrial OS=Rattus norvegicus OX=10116 GN=Decr1 PE=1 SV=2
37	1405	tr|A0A0H2UHV7|A0A0H2UHV7_RAT	46.08	2	2	305160	3	2	6		99265	Alanine--tRNA ligase mitochondrial OS=Rattus norvegicus OX=10116 GN=Aars2 PE=1 SV=1
37	1414	D3ZX08|SYAM_RAT	46.08	2	2	305160	3	2	6		107806	Alanine--tRNA ligase mitochondrial OS=Rattus norvegicus OX=10116 GN=Aars2 PE=3 SV=1
43	531	tr|D3ZHK4|D3ZHK4_RAT	46.03	1	1	1303900	4	1	5		182226	RB1-inducible coiled-coil 1 OS=Rattus norvegicus OX=10116 GN=Rb1cc1 PE=1 SV=1
197	300	Q5PQT3|GLYAT_RAT	45.52	3	3	0	1	1	1		33899	Glycine N-acyltransferase OS=Rattus norvegicus OX=10116 GN=Glyat PE=2 SV=1
197	301	tr|A4PB92|A4PB92_RAT	45.52	3	3	0	1	1	1		33899	Glycine N-acyltransferase OS=Rattus norvegicus OX=10116 GN=Glyat PE=2 SV=1
197	302	tr|A0A0G2JWI5|A0A0G2JWI5_RAT	45.52	3	3	0	1	1	1		39453	Glycine N-acyltransferase OS=Rattus norvegicus OX=10116 GN=Glyat PE=1 SV=1
197	1988	Q9Z2Y0|KEG1_RAT	45.52	3	3	0	1	1	1		34016	Glycine N-acyltransferase-like protein Keg1 OS=Rattus norvegicus OX=10116 GN=Keg1 PE=1 SV=2
197	303	tr|B1H250|B1H250_RAT	45.52	3	3	0	1	1	1		33986	Glycine-N-acyltransferase-like 1 OS=Rattus norvegicus OX=10116 GN=Glyatl1 PE=1 SV=1
238	137	tr|D4A7L4|D4A7L4_RAT	44.08	9	9	135780	1	1	1		17634	NADH dehydrogenase (Ubiquinone) 1 beta subcomplex 11 (Predicted) OS=Rattus norvegicus OX=10116 GN=Ndufb11 PE=1 SV=1
108	61	P29147|BDH_RAT	42.54	5	5	1473700	2	2	2		38202	D-beta-hydroxybutyrate dehydrogenase mitochondrial OS=Rattus norvegicus OX=10116 GN=Bdh1 PE=1 SV=2
108	62	tr|A0A0G2JSH2|A0A0G2JSH2_RAT	42.54	5	5	1473700	2	2	2		38333	3-hydroxybutyrate dehydrogenase type 1 isoform CRA_a OS=Rattus norvegicus OX=10116 GN=Bdh1 PE=1 SV=1
239	1075	Q9WVK7|HCDH_RAT	42.53	5	5	176350	1	1	1	Oxidation (M)	34448	Hydroxyacyl-coenzyme A dehydrogenase mitochondrial OS=Rattus norvegicus OX=10116 GN=Hadh PE=2 SV=1
59	619	P35559|IDE_RAT	41.38	1	1		3	0	4		117710	Insulin-degrading enzyme OS=Rattus norvegicus OX=10116 GN=Ide PE=1 SV=1
109	111	tr|S5RZM8|S5RZM8_RAT	40.45	7	7	496360	2	2	2		25958	Cytochrome c oxidase subunit 2 OS=Rattus norvegicus OX=10116 GN=COX2 PE=3 SV=1
109	112	P00406|COX2_RAT	40.45	7	7	496360	2	2	2		25928	Cytochrome c oxidase subunit 2 OS=Rattus norvegicus OX=10116 GN=Mtco2 PE=1 SV=3
109	114	tr|A0A097PE04|A0A097PE04_RAT	40.45	7	7	496360	2	2	2		25894	Cytochrome c oxidase subunit 2 OS=Rattus norvegicus OX=10116 GN=COX2 PE=3 SV=1
109	104	tr|Q5UAJ6|Q5UAJ6_RAT	40.45	7	7	496360	2	2	2		25942	Cytochrome c oxidase subunit 2 OS=Rattus norvegicus OX=10116 GN=COX2 PE=3 SV=1
109	113	tr|Q8SEZ5|Q8SEZ5_RAT	40.45	7	7	496360	2	2	2		25928	Cytochrome c oxidase subunit 2 OS=Rattus norvegicus OX=10116 GN=Mt-co2 PE=1 SV=1
198	190	P07824|ARGI1_RAT	38.36	4	4	0	1	1	1		34973	Arginase-1 OS=Rattus norvegicus OX=10116 GN=Arg1 PE=1 SV=2
180	306	Q2V057|HYPDH_RAT	38.16	2	2	171030	1	1	1		51002	Hydroxyproline dehydrogenase OS=Rattus norvegicus OX=10116 GN=Prodh2 PE=2 SV=1
62	11752	tr|D4A175|D4A175_RAT	38.03	2	2		2	0	4		53667	tRNA dimethylallyltransferase OS=Rattus norvegicus OX=10116 GN=Trit1 PE=3 SV=1
240	247	P10888|COX41_RAT	37.76	8	8	237750	1	1	1		19515	Cytochrome c oxidase subunit 4 isoform 1 mitochondrial OS=Rattus norvegicus OX=10116 GN=Cox4i1 PE=1 SV=1
199	34	tr|A0A0G2JVL6|A0A0G2JVL6_RAT	37.02	7	7	139230	1	1	1		19965	NADH dehydrogenase [ubiquinone] 1 alpha subcomplex subunit 8 OS=Rattus norvegicus OX=10116 GN=Ndufa8 PE=1 SV=1
120	5882	Q5XII9|MFR1L_RAT	35.65	5	5	383020	2	1	2		31730	Mitochondrial fission regulator 1-like OS=Rattus norvegicus OX=10116 GN=Mtfr1l PE=1 SV=1
51	872	Q5FWU3|ATG9A_RAT	35.58	1	1	2682600	2	2	5	Oxidation (M)	94488	Autophagy-related protein 9A OS=Rattus norvegicus OX=10116 GN=Atg9a PE=1 SV=1
55	761	tr|A0A0H2UH92|A0A0H2UH92_RAT	35.17	2	2	12907000	4	3	4	Formylation	136526	Graves disease carrier protein OS=Rattus norvegicus OX=10116 GN=Slc25a16 PE=1 SV=1
55	760	D3ZG52|DNA2_RAT	35.17	3	3	12907000	4	3	4	Formylation	119588	DNA replication ATP-dependent helicase/nuclease DNA2 OS=Rattus norvegicus OX=10116 GN=Dna2 PE=3 SV=1
103	5935	tr|B2GUW4|B2GUW4_RAT	34.74	2	2	614600	2	1	2		74060	Exdl2 protein OS=Rattus norvegicus OX=10116 GN=Exd2 PE=2 SV=1
42	462	tr|D3ZKC6|D3ZKC6_RAT	34.69	0	0	5088700	2	2	5		488962	Vacuolar protein sorting 13 homolog D OS=Rattus norvegicus OX=10116 GN=Vps13d PE=1 SV=1
42	461	tr|A0A0G2JYD4|A0A0G2JYD4_RAT	34.69	0	0	5088700	2	2	5		487857	Vacuolar protein sorting 13 homolog D OS=Rattus norvegicus OX=10116 GN=Vps13d PE=1 SV=1
241	338	Q5M9I5|QCR6_RAT	34.58	17	17	0	1	1	1		10424	Cytochrome b-c1 complex subunit 6 mitochondrial OS=Rattus norvegicus OX=10116 GN=Uqcrh PE=3 SV=1
68	5813	tr|F1LNF0|F1LNF0_RAT	33.81	1	1	374050	3	3	3		228912	Myosin heavy chain 14 OS=Rattus norvegicus OX=10116 GN=Myh14 PE=1 SV=1
82	702	tr|D3ZT64|D3ZT64_RAT	33.62	1	1	3341000	2	1	3		211362	Autophagy-related 2A OS=Rattus norvegicus OX=10116 GN=Atg2a PE=1 SV=1
73	1013	tr|D3ZJH9|D3ZJH9_RAT	33.27	1	1	0	1	1	3		65352	Malic enzyme OS=Rattus norvegicus OX=10116 GN=Me2 PE=1 SV=1
73	1014	tr|A0A0G2K502|A0A0G2K502_RAT	33.27	1	1	0	1	1	3		66310	Malic enzyme OS=Rattus norvegicus OX=10116 GN=Me2 PE=1 SV=1
73	11929	tr|A0A0G2K4C6|A0A0G2K4C6_RAT	33.27	1	1	0	1	1	3		63436	Malic enzyme OS=Rattus norvegicus OX=10116 GN=Me3 PE=3 SV=1
73	6137	P13697|MAOX_RAT	33.27	1	1	0	1	1	3		64003	NADP-dependent malic enzyme OS=Rattus norvegicus OX=10116 GN=Me1 PE=1 SV=2
73	11934	tr|F1M5N4|F1M5N4_RAT	33.27	1	1	0	1	1	3		67209	Malic enzyme OS=Rattus norvegicus OX=10116 GN=Me3 PE=3 SV=2
56	1230	tr|D3ZIE9|D3ZIE9_RAT	32.86	1	1		2	0	4		87329	Delta-1-pyrroline-5-carboxylate synthase OS=Rattus norvegicus OX=10116 GN=Aldh18a1 PE=3 SV=1
85	12007	B0BN56|RT31_RAT	32.47	3	3		2	0	3		43962	28S ribosomal protein S31 mitochondrial OS=Rattus norvegicus OX=10116 GN=Mrps31 PE=2 SV=1
110	59	P17178|CP27A_RAT	32.33	5	5	275650	2	2	2		60733	Sterol 26-hydroxylase mitochondrial OS=Rattus norvegicus OX=10116 GN=Cyp27a1 PE=1 SV=1
110	60	tr|A0A0H2UHN7|A0A0H2UHN7_RAT	32.33	5	5	275650	2	2	2		62492	RCG24013 isoform CRA_a OS=Rattus norvegicus OX=10116 GN=Cyp27a1 PE=1 SV=1
119	28662	tr|M0R601|M0R601_RAT	31.66	26	26	727560	2	2	2		5582	Uncharacterized protein OS=Rattus norvegicus OX=10116 PE=4 SV=2
119	34379	P29418|ATP5E_RAT	31.66	25	25	727560	2	2	2		5767	ATP synthase subunit epsilon mitochondrial OS=Rattus norvegicus OX=10116 GN=Atp5f1e PE=1 SV=2
127	656	tr|D3ZD23|D3ZD23_RAT	31.47	1	1	774480	2	2	2		67300	ATP-binding cassette subfamily E member 1 OS=Rattus norvegicus OX=10116 GN=Abce1 PE=1 SV=1
204	146	tr|B0BMT9|B0BMT9_RAT	31.03	2	2	0	1	1	1		50202	Sqrdl protein OS=Rattus norvegicus OX=10116 GN=Sqor PE=1 SV=1
91	626	tr|D4A054|D4A054_RAT	30.39	1	1	2468400	2	2	2	Formylation	341403	RAN-binding protein 2 OS=Rattus norvegicus OX=10116 GN=Ranbp2 PE=1 SV=2
91	627	tr|M0R3M4|M0R3M4_RAT	30.39	1	1	2468400	2	2	2	Formylation	344396	RAN-binding protein 2 OS=Rattus norvegicus OX=10116 GN=Ranbp2 PE=1 SV=1
92	650	D4A929|WDR81_RAT	28.68	1	1	652300	2	1	2		212258	WD repeat-containing protein 81 OS=Rattus norvegicus OX=10116 GN=Wdr81 PE=3 SV=1
160	341	tr|G3V6I5|G3V6I5_RAT	28.64	3	3	211230	1	1	1		46777	DnaJ heat shock protein family (Hsp40) member A3 OS=Rattus norvegicus OX=10116 GN=Dnaja3 PE=1 SV=2
160	342	tr|Q2TVU3|Q2TVU3_RAT	28.64	3	3	211230	1	1	1		49412	TID1 OS=Rattus norvegicus OX=10116 GN=Dnaja3 PE=2 SV=1
160	343	tr|A0A0G2K4Y1|A0A0G2K4Y1_RAT	28.64	3	3	211230	1	1	1		49416	DnaJ heat shock protein family (Hsp40) member A3 OS=Rattus norvegicus OX=10116 GN=Dnaja3 PE=1 SV=1
160	344	tr|Q2UZS7|Q2UZS7_RAT	28.64	2	2	211230	1	1	1		52399	Tid-1 long isoform OS=Rattus norvegicus OX=10116 GN=Dnaja3 PE=2 SV=1
160	345	tr|A0A0G2K5E4|A0A0G2K5E4_RAT	28.64	2	2	211230	1	1	1		52403	DnaJ heat shock protein family (Hsp40) member A3 OS=Rattus norvegicus OX=10116 GN=Dnaja3 PE=1 SV=1
80	5883	Q8VIJ5|OGA_RAT	28.21	1	1	751820	1	1	3		102918	Protein O-GlcNAcase OS=Rattus norvegicus OX=10116 GN=Oga PE=1 SV=1
118	1487	P48768|NAC2_RAT	28.2	1	1	2027300	2	1	2	Formylation	100523	Sodium/calcium exchanger 2 OS=Rattus norvegicus OX=10116 GN=Slc8a2 PE=1 SV=1
176	281	tr|F1LPV8|F1LPV8_RAT	27.77	3	3	285210	1	1	1		46639	Succinate--CoA ligase [GDP-forming] subunit beta mitochondrial OS=Rattus norvegicus OX=10116 GN=Suclg2 PE=1 SV=2
176	282	tr|B1H270|B1H270_RAT	27.77	3	3	285210	1	1	1		46988	Succinate--CoA ligase [GDP-forming] subunit beta mitochondrial OS=Rattus norvegicus OX=10116 GN=Suclg2 PE=2 SV=1
242	255	tr|I6V4L9|I6V4L9_RAT	27.5	3	3	55429	1	1	1		29844	Cytochrome c oxidase subunit 3 OS=Rattus norvegicus OX=10116 GN=COX3 PE=3 SV=1
201	678	Q63147|HEM0_RAT	27.39	2	2	255690	1	1	1		64842	5-aminolevulinate synthase erythroid-specific mitochondrial OS=Rattus norvegicus OX=10116 GN=Alas2 PE=1 SV=1
201	34380	tr|Q9ESE3|Q9ESE3_RAT	27.39	5	5	255690	1	1	1		18186	5-aminolevulinate synthase (Fragment) OS=Rattus norvegicus OX=10116 GN=ALS2 PE=2 SV=1
122	1374	tr|A0A0G2K3W1|A0A0G2K3W1_RAT	26.95	3	3	271030	1	1	2		53760	von Willebrand factor A domain-containing 8 OS=Rattus norvegicus OX=10116 GN=Vwa8 PE=1 SV=1
87	1081	tr|Q5XHZ7|Q5XHZ7_RAT	26.86	2	2	0	2	1	3		66660	MMR_HSR1 domain containing protein RGD1359460 OS=Rattus norvegicus OX=10116 GN=Noa1 PE=2 SV=1
87	1082	tr|A0A0G2JUI4|A0A0G2JUI4_RAT	26.86	2	2	0	2	1	3		66708	Nitric oxide-associated 1 OS=Rattus norvegicus OX=10116 GN=Noa1 PE=4 SV=1
87	1089	tr|A0A0G2K602|A0A0G2K602_RAT	26.86	2	2	0	2	1	3		77504	MMR_HSR1 domain containing protein RGD1359460 isoform CRA_a OS=Rattus norvegicus OX=10116 GN=Noa1 PE=4 SV=1
177	5924	P07150|ANXA1_RAT	26.42	3	3	118730	1	1	1		38829	Annexin A1 OS=Rattus norvegicus OX=10116 GN=Anxa1 PE=1 SV=2
77	5791	tr|F1LSY7|F1LSY7_RAT	25.86	1	1	17579000	2	2	3		109031	Endoplasmic reticulum to nucleus-signaling 1 OS=Rattus norvegicus OX=10116 GN=Ern1 PE=4 SV=2
77	5792	tr|A0A0G2K2H4|A0A0G2K2H4_RAT	25.86	1	1	17579000	2	2	3		110150	Endoplasmic reticulum to nucleus-signaling 1 OS=Rattus norvegicus OX=10116 GN=Ern1 PE=2 SV=1
178	5893	tr|F1LP46|F1LP46_RAT	25.79	1	1	296110	1	1	1		78923	ATP-dependent RNA helicase SUPV3L1 mitochondrial OS=Rattus norvegicus OX=10116 GN=Supv3l1 PE=1 SV=2
178	5894	tr|A0A0G2K9R3|A0A0G2K9R3_RAT	25.79	1	1	296110	1	1	1		84180	ATP-dependent RNA helicase SUPV3L1 mitochondrial OS=Rattus norvegicus OX=10116 GN=Supv3l1 PE=1 SV=1
178	5895	Q5EBA1|SUV3_RAT	25.79	1	1	296110	1	1	1		86706	ATP-dependent RNA helicase SUPV3L1 mitochondrial OS=Rattus norvegicus OX=10116 GN=Supv3l1 PE=2 SV=1
124	5796	B1WC61|ACAD9_RAT	25.51	2	2	146400	1	1	2		68843	Complex I assembly factor ACAD9 mitochondrial OS=Rattus norvegicus OX=10116 GN=Acad9 PE=1 SV=1
69	555	tr|D4A1D3|D4A1D3_RAT	24.54	0	0	0	2	1	3	Carbamidomethylation	521487	Sacsin molecular chaperone OS=Rattus norvegicus OX=10116 GN=Sacs PE=1 SV=2
74	485	Q2PQA9|KINH_RAT	24.48	2	2	0	2	1	3	Formylation	109531	Kinesin-1 heavy chain OS=Rattus norvegicus OX=10116 GN=Kif5b PE=1 SV=1
158	253	Q9ER34|ACON_RAT	24.46	1	1	268290	1	1	1		85433	Aconitate hydratase mitochondrial OS=Rattus norvegicus OX=10116 GN=Aco2 PE=1 SV=2
126	34383	Q32Q86|CRY1_RAT	23.56	1	1	327770	1	1	2		66231	Cryptochrome-1 OS=Rattus norvegicus OX=10116 GN=Cry1 PE=1 SV=1
81	356	O70600|RSAD2_RAT	23.54	5	5	7274900	2	2	3		41255	Radical S-adenosyl methionine domain-containing protein 2 OS=Rattus norvegicus OX=10116 GN=Rsad2 PE=1 SV=1
81	357	tr|A0A0H2UHF4|A0A0H2UHF4_RAT	23.54	5	5	7274900	2	2	3		41444	RCG62278 OS=Rattus norvegicus OX=10116 GN=Rsad2 PE=4 SV=1
100	683	O88658|KIF1B_RAT	23.34	0	0	988240	1	1	2		204169	Kinesin-like protein KIF1B OS=Rattus norvegicus OX=10116 GN=Kif1b PE=1 SV=2
64	489	tr|D3ZL86|D3ZL86_RAT	23.09	1	1	1843900	1	1	3		241219	HEAT repeat-containing protein 1 OS=Rattus norvegicus OX=10116 GN=Heatr1 PE=1 SV=2
205	34382	Q66HG6|CAH5B_RAT	22.69	2	2	192730	1	1	1		36598	Carbonic anhydrase 5B mitochondrial OS=Rattus norvegicus OX=10116 GN=Ca5b PE=2 SV=1
179	622	tr|A0A0G2JZG8|A0A0G2JZG8_RAT	22.46	1	1	238200	1	1	1		90015	Centrosomal protein 89 OS=Rattus norvegicus OX=10116 GN=Cep89 PE=4 SV=1
179	621	tr|B1WBZ3|B1WBZ3_RAT	22.46	1	1	238200	1	1	1		72885	Ccdc123 protein OS=Rattus norvegicus OX=10116 GN=Cep89 PE=2 SV=1
247	267	tr|Q06Q97|Q06Q97_RAT	22.43	2	2	0	1	1	1		38485	NADH-ubiquinone oxidoreductase chain 2 OS=Rattus norvegicus OX=10116 GN=ND2 PE=3 SV=1
247	268	tr|A0A0A1G491|A0A0A1G491_RAT	22.43	2	2	0	1	1	1		38542	NADH-ubiquinone oxidoreductase chain 2 OS=Rattus norvegicus OX=10116 GN=ND2 PE=3 SV=1
247	269	tr|Q5UAJ8|Q5UAJ8_RAT	22.43	2	2	0	1	1	1		38455	NADH-ubiquinone oxidoreductase chain 2 OS=Rattus norvegicus OX=10116 GN=ND2 PE=3 SV=1
247	270	tr|Q8HID0|Q8HID0_RAT	22.43	2	2	0	1	1	1		38653	NADH-ubiquinone oxidoreductase chain 2 OS=Rattus norvegicus OX=10116 GN=Mt-nd2 PE=3 SV=1
247	271	P11662|NU2M_RAT	22.43	2	2	0	1	1	1		38653	NADH-ubiquinone oxidoreductase chain 2 OS=Rattus norvegicus OX=10116 GN=Mtnd2 PE=3 SV=3
247	274	tr|Q06QB0|Q06QB0_RAT	22.43	2	2	0	1	1	1		38534	NADH-ubiquinone oxidoreductase chain 2 OS=Rattus norvegicus OX=10116 GN=ND2 PE=3 SV=1
247	416	tr|S5RF74|S5RF74_RAT	22.43	2	2	0	1	1	1		38641	NADH-ubiquinone oxidoreductase chain 2 OS=Rattus norvegicus OX=10116 GN=ND2 PE=3 SV=1
247	275	tr|D2E6P4|D2E6P4_RAT	22.43	2	2	0	1	1	1		38623	NADH-ubiquinone oxidoreductase chain 2 OS=Rattus norvegicus OX=10116 GN=ND2 PE=3 SV=1
145	6379	O08561|PI4KB_RAT	22.15	1	1	0	1	1	1	Formylation	91655	Phosphatidylinositol 4-kinase beta OS=Rattus norvegicus OX=10116 GN=Pi4kb PE=1 SV=1
249	355	tr|D4AE90|D4AE90_RAT	21.9	2	2	0	1	1	1	Formylation	50113	RCC1-like OS=Rattus norvegicus OX=10116 GN=Rcc1l PE=1 SV=1
257	1475	P04177|TY3H_RAT	21.53	1	1	1563200	1	1	1		55966	Tyrosine 3-monooxygenase OS=Rattus norvegicus OX=10116 GN=Th PE=1 SV=3
253	382	tr|D3ZU73|D3ZU73_RAT	21.16	3	3	995820	1	1	1		28584	Nipsnap homolog 3A (C. elegans) OS=Rattus norvegicus OX=10116 GN=Nipsnap3a PE=4 SV=2
255	6385	O88767|PARK7_RAT	20.89	5	5	0	1	1	1		19974	Protein/nucleic acid deglycase DJ-1 OS=Rattus norvegicus OX=10116 GN=Park7 PE=1 SV=1
255	6386	tr|Q5BKC3|Q5BKC3_RAT	20.89	5	5	0	1	1	1		22503	Park7 protein OS=Rattus norvegicus OX=10116 GN=Park7 PE=1 SV=1
256	66	tr|D4A0T0|D4A0T0_RAT	20.77	10	10	434220	1	1	1		20859	NADH:ubiquinone oxidoreductase subunit B10 OS=Rattus norvegicus OX=10116 GN=Ndufb10 PE=1 SV=1
261	1953	D4A5C3|HMGC2_RAT	20.62	2	2	416380	1	1	1		36549	3-hydroxy-3-methylglutaryl-CoA lyase cytoplasmic OS=Rattus norvegicus OX=10116 GN=Hmgcll1 PE=1 SV=1
262	1059	tr|A0A0G2KA48|A0A0G2KA48_RAT	20.27	2	2	367770	1	1	1		46686	39S ribosomal protein L37 mitochondrial OS=Rattus norvegicus OX=10116 GN=Mrpl37 PE=1 SV=1
262	1060	Q6AXT0|RM37_RAT	20.27	2	2	367770	1	1	1		48366	39S ribosomal protein L37 mitochondrial OS=Rattus norvegicus OX=10116 GN=Mrpl37 PE=2 SV=1
