# Supplementary material for: Mitochondrial F-ATP Synthase Co-Migrating Proteins and Ca2+-Dependent Formation of Large Channels
Source: Cells. 2023 Oct 7;12(19):2414. doi: 10.3390/cells12192414 (PMC10572550; doi:10.3390/cells12192414)
Supplement: Supplementary file 1 [file cells-12-02414-s001.zip › Dataset S7.xlsx]

## Sheet: RHM Dimer All
Protein Group	Protein ID	-10lgP	Coverage (%)	Coverage (%) Sample 1	Area (IBAQ)	riBAQ	#Peptides	#Unique	#Spec Sample 1	PTM	Avg. Mass	Accession	rIBAQ PTP/Control	Protein Group	Protein ID	-10lgP	Coverage (%)	Coverage (%) Sample 1	Area (IBAQ)	riBAQ	#Peptides	#Unique	#Spec Sample 1	PTM	Avg. Mass	Description
					CONTROL	%													PTP	%
Complex I
3	3421	260.31	28	28	48874000	4.26006	56	56	173	Y	79412	Q66HF1|NDUS1_RAT	0.339181	5	20	252.49	21	21	44940000	1.44493	39	39	140	Carbamidomethylation	79412	NADH-ubiquinone oxidoreductase 75 kDa subunit mitochondrial OS=Rattus norvegicus OX=10116 GN=Ndufs1 PE=1 SV=1
4	2870	232.09	39	39	66119000	5.76321	31	31	121	N	27378	P19234|NDUV2_RAT	0.597557	3	37	241.39	44	44	107110000	3.44385	30	30	145		27378	NADH dehydrogenase [ubiquinone] flavoprotein 2 mitochondrial OS=Rattus norvegicus OX=10116 GN=Ndufv2 PE=1 SV=2
5	2856	210.73	30	30	34707000	3.02521	32	32	101	Y	52562	Q641Y2|NDUS2_RAT	0.414393	9	26	204.62	26	26	38990000	1.25362	29	29	80	Oxidation (M)	52562	NADH dehydrogenase [ubiquinone] iron-sulfur protein 2 mitochondrial OS=Rattus norvegicus OX=10116 GN=Ndufs2 PE=1 SV=1
7	5406	228.99	38	38	15159000	1.32132	31	30	81	N	42559	Q5BK63|NDUA9_RAT	0.450073	11	49	195.5	30	30	18496000	0.594692	21	21	61		42559	NADH dehydrogenase [ubiquinone] 1 alpha subcomplex subunit 9 mitochondrial OS=Rattus norvegicus OX=10116 GN=Ndufa9 PE=1 SV=2
15	2857	219.65	23	23	19269000	1.67957	13	13	38	Y	21959	tr|B2RYS8|B2RYS8_RAT	0.444833	12	212	246.45	48	48	23237000	0.747126	23	23	61	Oxidation (M)	21959	NADH dehydrogenase [ubiquinone] 1 beta subcomplex subunit 8 mitochondrial OS=Rattus norvegicus OX=10116 GN=Ndufb8 PE=1 SV=1
16	2821	154.05	27	27	18181000	1.58473	10	10	37	N	14359	tr|Q5PQZ9|Q5PQZ9_RAT	0.470499	13	77	201.91	37	37	23190000	0.745615	13	13	56		14359	NADH dehydrogenase [ubiquinone] 1 subunit C2 OS=Rattus norvegicus OX=10116 GN=Ndufc2 PE=1 SV=1
8	2807	206.44	43	43	23602000	2.05725	35	35	79	N	30226	tr|D3ZG43|D3ZG43_RAT	0.299136	14	74	164.22	34	34	19140000	0.615398	22	22	52		30226	NADH dehydrogenase (Ubiquinone) Fe-S protein 3 (Predicted) isoform CRA_c OS=Rattus norvegicus OX=10116 GN=Ndufs3 PE=1 SV=1
26	5412	173.26	34	34	6636500	0.578465	15	15	24	N	21664	tr|D4A565|D4A565_RAT	0.739801	15	60	232.34	34	34	13310000	0.427949	15	15	47		21664	NADH dehydrogenase (Ubiquinone) 1 beta subcomplex 5 (Predicted) isoform CRA_b OS=Rattus norvegicus OX=10116 GN=Ndufb5 PE=1 SV=1
11	5408	161.2	22	22	11086000	0.966302	17	17	52	N	50731	tr|Q5XIH3|Q5XIH3_RAT	0.569579	16	80	134.88	14	14	17118000	0.550386	12	11	46		50731	NADH dehydrogenase [ubiquinone] flavoprotein 1 mitochondrial OS=Rattus norvegicus OX=10116 GN=Ndufv1 PE=1 SV=1
18	5410	130.85	33	33	8793300	0.766461	16	16	35	Y	40493	Q561S0|NDUAA_RAT	0.344565	19	171	142.62	24	24	8213850	0.264095	14	4	43	Oxidation (M)	40493	NADH dehydrogenase [ubiquinone] 1 alpha subcomplex subunit 10 mitochondrial OS=Rattus norvegicus OX=10116 GN=Ndufa10 PE=1 SV=1
17	2872	172.5	32	32	14159000	1.23416	13	13	36	Y	17634	tr|D4A7L4|D4A7L4_RAT	0.58461	20	160	196.05	26	26	22440000	0.721501	9	9	41		17634	NADH dehydrogenase (Ubiquinone) 1 beta subcomplex 11 (Predicted) OS=Rattus norvegicus OX=10116 GN=Ndufb11 PE=1 SV=1
20	3028	148.03	29	29	8295600	0.723079	11	11	32	N	19965	tr|A0A0G2JVL6|A0A0G2JVL6_RAT	1.13975	21	161	161.02	44	44	25632000	0.824132	13	13	39	Carbamidomethylation	19965	NADH dehydrogenase [ubiquinone] 1 alpha subcomplex subunit 8 OS=Rattus norvegicus OX=10116 GN=Ndufa8 PE=1 SV=1
21	5411	167.03	26	26	7454200	0.649739	13	13	32	Y	23970	tr|B0BNE6|B0BNE6_RAT	0.500988	22	199	172.57	25	25	10124000	0.325511	13	13	39		23970	NADH dehydrogenase (Ubiquinone) Fe-S protein 8 (Predicted) isoform CRA_a OS=Rattus norvegicus OX=10116 GN=Ndufs8 PE=1 SV=1
28	180	142.75	21	21	12726000	1.10925	9	9	22	N	20859	tr|D4A0T0|D4A0T0_RAT	0.371945	23	172	158.95	27	27	12832000	0.41258	10	10	38		20859	NADH:ubiquinone oxidoreductase subunit B10 OS=Rattus norvegicus OX=10116 GN=Ndufb10 PE=1 SV=1
48	5458	126.04	17	17	5432200	0.473493	3	3	8	N	17178	tr|F1LXA0|F1LXA0_RAT	1.20531	25	211	173.13	29	29	17750000	0.570706	8	8	37		17178	NADH dehydrogenase [ubiquinone] 1 alpha subcomplex subunit 12 OS=Rattus norvegicus OX=10116 GN=Ndufa12 PE=1 SV=2
40	5448	86.16	26	26	1908900	0.166388	4	4	11	Y	15638	tr|D3ZZ21|D3ZZ21_RAT	1.62616	26	313	151.15	49	49	8415300	0.270572	10	10	35	Oxidation (M)	15638	NADH dehydrogenase (Ubiquinone) 1 beta subcomplex 6 (Predicted) OS=Rattus norvegicus OX=10116 GN=Ndufb6 PE=1 SV=1
23	5414	140.47	9	9	8536000	0.744034	11	11	27	Y	68618	P11661|NU5M_RAT	0.402501	27	138	141.53	10	10	9314200	0.299474	12	12	32	Oxidation (M)	68618	NADH-ubiquinone oxidoreductase chain 5 OS=Rattus norvegicus OX=10116 GN=Mtnd5 PE=3 SV=3
39	5447	112.42	26	26	1490000	0.129875	8	8	11	N	16777	tr|D3ZE15|D3ZE15_RAT	1.25711	28	72	114.68	28	28	5077900	0.163267	8	7	28		16777	NADH:ubiquinone oxidoreductase subunit A13 OS=Rattus norvegicus OX=10116 GN=Ndufa13 PE=1 SV=1
63	5445	101.71	19	19	560640	0.0488677	3	3	4	N	15064	tr|F1LPG5|F1LPG5_RAT	4.59814	30	56	128.69	35	35	6988600	0.224701	9	9	26		15064	NADH:ubiquinone oxidoreductase subunit B4 OS=Rattus norvegicus OX=10116 GN=Ndufb4 PE=1 SV=1
29	5440	151.01	19	19	6841500	0.596334	7	7	22	N	14854	Q80W89|NDUAB_RAT	0.897662	31	198	165.2	18	18	16649000	0.535306	7	7	26		14854	NADH dehydrogenase [ubiquinone] 1 alpha subcomplex subunit 11 OS=Rattus norvegicus OX=10116 GN=Ndufa11 PE=2 SV=1
43	5455	104.79	31	31	7056100	0.615039	7	7	9	Y	10170	tr|A0A0G2KAA3|A0A0G2KAA3_RAT	0.829846	35	250	198.26	34	34	15874000	0.510388	9	9	24	Oxidation (M)	10170	NADH:ubiquinone oxidoreductase subunit A3 OS=Rattus norvegicus OX=10116 GN=Ndufa3 PE=1 SV=1
						0						tr|D3ZLT1|D3ZLT1_RAT	+	38	3918	74.26	16	16	6726500	0.216273	3	3	20	Oxidation (M)	16568	NADH dehydrogenase (Ubiquinone) 1 beta subcomplex 7 (Predicted) OS=Rattus norvegicus OX=10116 GN=Ndufb7 PE=1 SV=1
41	5449	91.1	23	23	1593600	0.138905	3	3	11	N	10845	tr|D3ZS58|D3ZS58_RAT	1.62882	39	219	133.46	12	12	7036800	0.22625	6	6	19		10845	NADH dehydrogenase [ubiquinone] 1 alpha subcomplex subunit 2 OS=Rattus norvegicus OX=10116 GN=Ndufa2 PE=1 SV=1
88	5424	61.72	8	8	262320	0.0228649	2	2	2	N	15224	tr|D4A3V2|D4A3V2_RAT	4.02002	40	827	116.96	33	33	2858800	0.0919174	12	12	19		15224	NADH dehydrogenase [ubiquinone] 1 alpha subcomplex subunit 6 OS=Rattus norvegicus OX=10116 GN=Ndufa6 PE=1 SV=1
37	5442	111.74	17	17	3348400	0.291861	3	3	12	N	12700	tr|B5DEL8|B5DEL8_RAT	0.519752	41	3899	120.07	22	22	4718000	0.151695	6	6	17		12700	NADH dehydrogenase (Ubiquinone) Fe-S protein 5 OS=Rattus norvegicus OX=10116 GN=Ndufs5 PE=1 SV=1
55	5450	76.99	21	21	1509700	0.131592	3	3	6	N	12500	tr|A9UMV9|A9UMV9_RAT	7.24624	44	169	115.75	21	21	29657000	0.953545	4	4	15		12500	NADH:ubiquinone oxidoreductase subunit A7 OS=Rattus norvegicus OX=10116 GN=Ndufa7 PE=1 SV=1
35	564	89.03	15	15	2707400	0.235988	4	4	13	Y	23945	tr|Q5RJN0|Q5RJN0_RAT	0.545093	47	376	91.45	21	21	4000800	0.128636	5	5	13	Oxidation (M)	23945	NADH dehydrogenase (Ubiquinone) Fe-S protein 7 OS=Rattus norvegicus OX=10116 GN=Ndufs7 PE=1 SV=1
50	1301	57.87	10	10	721790	0.0629142	4	4	7	N	38455	P11662|NU2M_RAT	0.778536	51	389	55.93	6	6	1523400	0.048981	3	3	12		38653	NADH-ubiquinone oxidoreductase chain 2 OS=Rattus norvegicus OX=10116 GN=Mtnd2 PE=3 SV=3
57	5435	52.17	21	21	1520800	0.132559	2	2	5	N	13040	tr|D3ZCZ9|D3ZCZ9_RAT	0.89892	52	3906	67.58	16	16	3706100	0.11916	3	3	12		13040	NADH dehydrogenase [ubiquinone] iron-sulfur protein 6 mitochondrial OS=Rattus norvegicus OX=10116 GN=LOC100912599 PE=1 SV=1
51	5457	75.88	12	12	973700	0.0848718	5	5	7	N	19741	Q5XIF3|NDUS4_RAT	1.68536	55	238	107.99	12	12	4448800	0.14304	3	3	11		19741	NADH dehydrogenase [ubiquinone] iron-sulfur protein 4 mitochondrial OS=Rattus norvegicus OX=10116 GN=Ndufs4 PE=1 SV=1
108	5486	24.58	9	9	365080	0.0318219	1	1	1	N	11842	tr|B2RYU0|B2RYU0_RAT	6.47668	56	3914	78.75	26	26	6410100	0.2061	5	4	11		11842	NADH dehydrogenase (Ubiquinone) 1 beta subcomplex 2 (Predicted) isoform CRA_b OS=Rattus norvegicus OX=10116 GN=Ndufb2 PE=1 SV=1
38	672	68.86	6	6	2854700	0.248828	5	5	11	N	36145	P03889|NU1M_RAT	0.337925	59	3902	47.26	5	5	2615200	0.0840851	3	3	10		36145	NADH-ubiquinone oxidoreductase chain 1 OS=Rattus norvegicus OX=10116 GN=Mtnd1 PE=1 SV=3
62	5425	26.36	2	2	362850	0.0316275	1	1	4	N	51783	P05508|NU4M_RAT	0.684403	62	363	38.13	5	5	673230	0.021646	3	3	7		51783	NADH-ubiquinone oxidoreductase chain 4 OS=Rattus norvegicus OX=10116 GN=Mtnd4 PE=3 SV=3
64	5451	30.36	15	15	726610	0.0633344	2	2	4	N	11267	tr|D4A4P3|D4A4P3_RAT	0.547107	68	467	49.48	30	30	1077700	0.0346507	4	4	7	Oxidation (M)	11267	NADH:ubiquinone oxidoreductase subunit B3 OS=Rattus norvegicus OX=10116 GN=Ndufb3 PE=1 SV=1
45	5439	111.71	20	20	1791600	0.156163	4	4	9	N	13412	Q63362|NDUA5_RAT	0.382296	71	73	97.02	17	17	1856800	0.0597007	4	4	6		13412	NADH dehydrogenase [ubiquinone] 1 alpha subcomplex subunit 5 OS=Rattus norvegicus OX=10116 GN=Ndufa5 PE=1 SV=3
75	5460	45.67	13	13	277810	0.0242151	1	1	3	N	8389	tr|Q35733|Q35733_RAT	1.71669	75	3930	93.65	14	14	1292900	0.0415699	3	3	6		8389	NADH-ubiquinone oxidoreductase chain 6 (Fragment) OS=Rattus norvegicus OX=10116 PE=3 SV=1
56	5441	45.99	7	7	1041600	0.0907902	1	1	5	Y	21892	tr|B2RYW3|B2RYW3_RAT	0.411971	76	3911	51.96	18	18	1163300	0.0374029	4	4	5	Oxidation (M)	21892	NADH dehydrogenase (Ubiquinone) 1 beta subcomplex 9 OS=Rattus norvegicus OX=10116 GN=Ndufb9 PE=1 SV=1
13	3210	194.65	28	28	14275000	1.24427	17	17	49	Y	17514	tr|D3ZF13|D3ZF13_RAT	0.407529	18	252	185.52	23	23	15771000	0.507076	13	13	44	Oxidation (M)	17514	Acyl carrier protein OS=Rattus norvegicus OX=10116 GN=Ndufab1 PE=1 SV=1
Complex III
10	34	164.71	18	18	15525000	1.35322	22	22	55	N	48396	P32551|QCR2_RAT	0.494491	17	50	134.81	11	11	20812000	0.669157	10	10	46		48396	Cytochrome b-c1 complex subunit 2 mitochondrial OS=Rattus norvegicus OX=10116 GN=Uqcrc2 PE=1 SV=2
44	132	117.18	15	15	997010	0.0869036	5	5	9	N	29446	P20788|UCRI_RAT	4.07642	36	58	186.51	17	17	11018000	0.354256	9	9	21		29446	Cytochrome b-c1 complex subunit Rieske mitochondrial OS=Rattus norvegicus OX=10116 GN=Uqcrfs1 PE=1 SV=2
14	118	176.06	23	23	10042000	0.875303	23	23	47	Y	52849	Q68FY0|QCR1_RAT	0.131577	42	25	165.24	14	14	3582000	0.11517	9	9	16	Carbamidomethylation	52849	Cytochrome b-c1 complex subunit 1 mitochondrial OS=Rattus norvegicus OX=10116 GN=Uqcrc1 PE=1 SV=1
33	79	125.19	12	12	3117800	0.271761	8	8	17	N	43012	P00159|CYB_RAT	0.231571	43	130	140.87	7	7	1957300	0.062932	6	6	15		43012	Cytochrome b OS=Rattus norvegicus OX=10116 GN=Mt-Cyb PE=3 SV=3
73	2875	34.79	17	17	314440	0.0274079	3	3	3	N	10424	Q5M9I5|QCR6_RAT	3.67687	54	318	111.53	18	18	3134300	0.100775	4	4	12		10424	Cytochrome b-c1 complex subunit 6 mitochondrial OS=Rattus norvegicus OX=10116 GN=Uqcrh PE=3 SV=1
						0						Q7TQ16|QCR8_RAT	+	66	208	45.75	11	11	727260	0.0233832	2	2	7		9849	Cytochrome b-c1 complex subunit 8 OS=Rattus norvegicus OX=10116 GN=Uqcrq PE=3 SV=1
						0						tr|B2RYS2|B2RYS2_RAT	+	98	3893	26.54	16	16	480600	0.0154525	2	2	2		13559	Cytochrome b-c1 complex subunit 7 OS=Rattus norvegicus OX=10116 GN=Uqcrb PE=1 SV=1
Complex IV
27	133	167.41	12	12	7580300	0.660731	7	7	23	Y	35435	tr|D3ZFQ8|D3ZFQ8_RAT	0.788567	24	59	196.84	13	13	16205000	0.52103	9	9	37		35435	Cytochrome c-1 OS=Rattus norvegicus OX=10116 GN=Cyc1 PE=1 SV=3
24	24	133.46	32	32	6358700	0.554251	14	14	26	Y	25942	P00406|COX2_RAT	0.258432	34	34	125.74	32	32	4454900	0.143236	10	10	24	Oxidation (M)	25928	Cytochrome c oxidase subunit 2 OS=Rattus norvegicus OX=10116 GN=Mtco2 PE=1 SV=3
65	134	71.8	21	21	321550	0.0280276	2	2	4	N	7375	P80432|COX7C_RAT	5.45421	45	251	143.95	21	21	4754500	0.152869	4	4	15		7375	Cytochrome c oxidase subunit 7C mitochondrial OS=Rattus norvegicus OX=10116 GN=Cox7c PE=1 SV=2
54	151	116.98	14	14	1422000	0.123947	3	3	6	N	10487	P10817|CX6A2_RAT	1.2249	50	253	119.87	26	26	4722000	0.151824	5	5	12		10487	Cytochrome c oxidase subunit 6A2 mitochondrial (Fragment) OS=Rattus norvegicus OX=10116 GN=Cox6a2 PE=1 SV=3
25	86	141.75	42	42	4296900	0.374536	9	9	25	N	16130	P11240|COX5A_RAT	0.190544	53	200	155.04	29	29	2219600	0.0713656	8	8	12		16130	Cytochrome c oxidase subunit 5A mitochondrial OS=Rattus norvegicus OX=10116 GN=Cox5a PE=1 SV=1
87	2795	37.15	3	3	105120	0.0091627	2	2	2	N	56845	P05503|COX1_RAT	2.13937	81	1026	60.72	3	3	609670	0.0196024	2	2	5		56845	Cytochrome c oxidase subunit 1 OS=Rattus norvegicus OX=10116 GN=Mtco1 PE=2 SV=3
52	139	61.53	11	11	3573300	0.311464	3	3	7	N	13915	P12075|COX5B_RAT	0.90315	82	151	38.68	11	11	8748900	0.281299	3	3	4		13915	Cytochrome c oxidase subunit 5B mitochondrial OS=Rattus norvegicus OX=10116 GN=Cox5b PE=1 SV=2
132	1062	21.25	12	12	44810	0.00390583	1	1	1	N	9353	P35171|CX7A2_RAT	9.50622	85	263	80.03	12	12	1154800	0.0371296	2	2	4		9353	Cytochrome c oxidase subunit 7A2 mitochondrial OS=Rattus norvegicus OX=10116 GN=Cox7a2 PE=1 SV=1
47	290	68.37	12	12	2010600	0.175252	3	3	8	N	19515	P10888|COX41_RAT	0.151781	86	292	52.97	12	12	827310	0.0266	3	3	4		19515	Cytochrome c oxidase subunit 4 isoform 1 mitochondrial OS=Rattus norvegicus OX=10116 GN=Cox4i1 PE=1 SV=1
66	2866	49.12	3	3	151450	0.013201	1	1	4	N	29871	P05505|COX3_RAT	-	90	270	55.61	3	3	0	0	2	2	3		29871	Cytochrome c oxidase subunit 3 OS=Rattus norvegicus OX=10116 GN=Mtco3 PE=1 SV=5
						0						P11951|CX6C2_RAT	+	104	207	26.38	17	17	427700	0.0137516	2	2	2		8455	Cytochrome c oxidase subunit 6C-2 OS=Rattus norvegicus OX=10116 GN=Cox6c2 PE=1 SV=3
130	2798	23.83	14	14	92435	0.00805702	1	1	1	N	8995	P80431|COX7B_RAT	0.466383	168	3923	21.01	14	14	116870	0.00375766	1	1	1		8995	Cytochrome c oxidase subunit 7B mitochondrial OS=Rattus norvegicus OX=10116 GN=Cox7b PE=1 SV=3
103	568	28.49	9	9	46814	0.0040805	1	1	1	N	9327	tr|B2RZD6|B2RZD6_RAT	8.56268	73	209	44.09	22	22	1086700	0.0349401	4	4	6		9327	NDUFA4 mitochondrial complex-associated OS=Rattus norvegicus OX=10116 GN=Ndufa4 PE=1 SV=1
						0														0
Complex V						0														0
2	1	378.4	50	50	345830000	30.144	124	124	582	Y	56354	P10719|ATPB_RAT	1.42075	1	5	390.79	47	47	1332000000	42.8271	124	120	681	Oxidation (M)	56354	ATP synthase subunit beta mitochondrial OS=Rattus norvegicus OX=10116 GN=Atp5f1b PE=1 SV=2
1	3	312.23	48	48	267690000	23.333	108	108	601	Y	59754	P15999|ATPA_RAT	0.976301	2	8	331.26	41	41	708500000	22.78	109	107	645	Carbamidomethylation		ATP synthase subunit alpha, mitochondrial
6	5	246.27	34	34	22396000	1.95213	26	26	89	Y	30191	P35435|ATPG_RAT	1.18457	4	63	262.75	37	37	71921000	2.31244	37	37	141	Oxidation (M)	30191	ATP synthase subunit gamma mitochondrial OS=Rattus norvegicus OX=10116 GN=Atp5f1c PE=1 SV=2
9	7	247.72	53	53	20584000	1.79419	21	21	67	Y	18763	P31399|ATP5H_RAT	1.52939	6	65	277.38	61	61	85344000	2.74402	30	30	128	Oxidation (M)	18763	ATP synthase subunit d mitochondrial OS=Rattus norvegicus OX=10116 GN=Atp5pd PE=1 SV=3
19	11	122.89	39	39	6407800	0.558531	9	9	33	Y	11433	Q6PDU7|ATP5L_RAT	1.96439	7	75	183.33	48	48	34124000	1.09717	19	18	89	Oxidation (M)	11433	ATP synthase subunit g mitochondrial OS=Rattus norvegicus OX=10116 GN=Atp5mg PE=1 SV=2
12	10	124.23	17	17	27671000	2.41192	10	10	49	N	28869	P19511|AT5F1_RAT	1.53809	8	168	173.06	20	20	115380000	3.70975	18	18	81		28869	ATP synthase F(0) complex subunit B1 mitochondrial OS=Rattus norvegicus OX=10116 GN=Atp5pb PE=1 SV=1
22	8	124.51	26	26	7095700	0.618491	10	10	30	N	23398	Q06647|ATPO_RAT	2.16254	10	76	162.91	29	29	41599000	1.33751	19	18	72		23398	ATP synthase subunit O mitochondrial OS=Rattus norvegicus OX=10116 GN=Atp5po PE=1 SV=1
						0						P29419|ATP5I_RAT	+	29	319	125.84	51	51	10020000	0.322168	10	10	28		8255	ATP synthase subunit e mitochondrial OS=Rattus norvegicus OX=10116 GN=Atp5me PE=1 SV=3
49	15	47.43	8	8	976850	0.0851463	2	2	7	Y	25076	P05504|ATP6_RAT	1.60686	37	258	51.09	12	12	4255300	0.136818	3	3	21	Oxidation (M)	25076	ATP synthase subunit a OS=Rattus norvegicus OX=10116 GN=Mt-atp6 PE=1 SV=3
31	12	135.48	33	33	5030800	0.438506	8	8	18	Y	17563	tr|G3V7Y3|G3V7Y3_RAT	0.538585	46	3953	81.42	11	11	7345400	0.236173	5	5	14		17563	ATP synthase subunit delta mitochondrial OS=Rattus norvegicus OX=10116 GN=Atp5f1d PE=1 SV=1
46	35	80.38	19	19	7031700	0.612913	3	3	9	Y	7630	P11608|ATP8_RAT	0.531929	48	234	115.4	19	19	10140000	0.326026	4	4	13	Oxidation (M)	7630	ATP synthase protein 8 OS=Rattus norvegicus OX=10116 GN=Mt-atp8 PE=1 SV=2
						0						D3ZAF6|ATPK_RAT	+	78	12050	34.41	10	10	1883500	0.0605591	3	3	5		10452	ATP synthase subunit f mitochondrial OS=Rattus norvegicus OX=10116 GN=Atp5mf PE=1 SV=1
125	89	33.84	21	21	548650	0.0478226	1	1	1	N	6408	Q9JJW3|ATPMD_RAT	1.09139	109	12038	34.48	22	22	1623300	0.0521931	2	2	2		6408	ATP synthase membrane subunit DAPIT mitochondrial OS=Rattus norvegicus OX=10116 GN=Atp5md PE=1 SV=1
123	30	39.99	10	10	171430	0.0149426	1	1	1	N	12494	P21571|ATP5J_RAT	1.36388	89	12037	60.92	24	24	633850	0.0203798	3	3	3	Oxidation (M)	12494	ATP synthase-coupling factor 6 mitochondrial OS=Rattus norvegicus OX=10116 GN=Atp5pf PE=1 SV=1
Others
30	19	153.42	16	16	2596800	0.226348	10	10	20	Y	47314	P00507|AATM_RAT	0.735202	33	45	162.61	17	17	5175700	0.166411	11	11	25	Oxidation (M)	47314	Aspartate aminotransferase mitochondrial OS=Rattus norvegicus OX=10116 GN=Got2 PE=1 SV=2
32	5407	124.95	32	32	2115400	0.184387	11	11	18	N	29820	P67779|PHB_RAT	0.50689	49	532	128.14	18	18	2906900	0.0934639	8	8	12		29820	Prohibitin OS=Rattus norvegicus OX=10116 GN=Phb PE=1 SV=1
						0						Q91XJ1|BECN1_RAT	+	57	326	54.23	3	3		0	3	0	11		51557	Beclin-1 OS=Rattus norvegicus OX=10116 GN=Becn1 PE=1 SV=1
95	1010	20.32	3	3	127850	0.0111439	1	1	1	N	32989	Q05962|ADT1_RAT	4.4507	58	24	81.73	10	10	1542600	0.0495984	5	5	10		32989	ADP/ATP translocase 1 OS=Rattus norvegicus OX=10116 GN=Slc25a4 PE=1 SV=3
42	9	96.05	6	6	1180300	0.10288	7	7	10	N	82665	Q64428|ECHA_RAT	0.194006	60	21	62.55	6	6	620770	0.0199593	5	5	7		82665	Trifunctional enzyme subunit alpha mitochondrial OS=Rattus norvegicus OX=10116 GN=Hadha PE=1 SV=2
122	138	44.17	2	2	172350	0.0150227	1	1	1	N	88217	Q63704|CPT1B_RAT	1.07312	61	61	83.57	3	3	501400	0.0161212	3	3	7		88217	Carnitine O-palmitoyltransferase 1 muscle isoform OS=Rattus norvegicus OX=10116 GN=Cpt1b PE=1 SV=1
36	284	25.68	2	2	2626900	0.228972	1	1	12	N	36404	Q5M934|TRUB1_RAT	2.39488	63	1269	23.08	2	2	17055000	0.54836	1	1	7		36404	Probable tRNA pseudouridine synthase 1 OS=Rattus norvegicus OX=10116 GN=Trub1 PE=2 SV=1
60	196	51.56	1	1	2297500	0.20026	3	3	4	Y	223506	P02563|MYH6_RAT	0.239	64	16	86.5	3	3	1488600	0.0478621	5	5	7	Oxidation (M)	223506	Myosin-6 OS=Rattus norvegicus OX=10116 GN=Myh6 PE=1 SV=2
58	20	62.75	7	7	432720	0.0377177	4	4	5	N	51414	Q60587|ECHB_RAT	0.786658	67	29	79.98	8	8	922820	0.0296709	5	5	7		51414	Trifunctional enzyme subunit beta mitochondrial OS=Rattus norvegicus OX=10116 GN=Hadhb PE=1 SV=1
72	2803	64.55	4	4	240260	0.0209421	2	2	3	N	51960	Q6AXV4|SAM50_RAT	0.590539	69	14	77.24	6	6	384640	0.0123671	3	3	7		51960	Sorting and assembly machinery component 50 homolog OS=Rattus norvegicus OX=10116 GN=Samm50 PE=1 SV=1
34	5423	102.71	13	13	3542500	0.308779	5	5	15	N	33312	Q5XIH7|PHB2_RAT	0.183348	70	335	74.3	10	10	1760800	0.056614	4	4	6		33312	Prohibitin-2 OS=Rattus norvegicus OX=10116 GN=Phb2 PE=1 SV=1
						0						B0BN56|RT31_RAT	+	72	8248	53.37	6	6	244140	0.0078497	3	1	6		43962	28S ribosomal protein S31 mitochondrial OS=Rattus norvegicus OX=10116 GN=Mrps31 PE=2 SV=1
59	88	78.75	4	4	649530	0.0566158	3	3	5	N	85433	Q9ER34|ACON_RAT	0.336456	77	17	89.78	3	3	592450	0.0190487	3	3	5		85433	Aconitate hydratase mitochondrial OS=Rattus norvegicus OX=10116 GN=Aco2 PE=1 SV=2
61	2787	62.78	8	8	1100400	0.0959155	3	3	4	N	44695	P17764|THIL_RAT	0.432764	79	44	69.95	5	5	1291000	0.0415088	2	2	5		44695	Acetyl-CoA acetyltransferase mitochondrial OS=Rattus norvegicus OX=10116 GN=Acat1 PE=1 SV=1
						0						P11530|DMD_RAT	+	92	224	27.58	1	1	2253100	0.0724427	2	2	2	Oxidation (M)		Dystrophin
						0						tr|Q4G067|Q4G067_RAT	+	105	8042	39.5	4	4	361430	0.0116209	2	2	2		37440	Mitochondrial ribosomal protein L44 OS=Rattus norvegicus OX=10116 GN=Mrpl44 PE=1 SV=1
						0						Q9Z0V6|PRDX3_RAT	+	111	316	28.27	5	5	356470	0.0114614	1	1	2		28295	Thioredoxin-dependent peroxide reductase mitochondrial OS=Rattus norvegicus OX=10116 GN=Prdx3 PE=1 SV=2
						0						tr|D4A4B1|D4A4B1_RAT	+	112	4487	35.63	8	8	139410	0.00448237	2	2	2		23223	Mitochondrial ribosomal protein L15 OS=Rattus norvegicus OX=10116 GN=Mrpl15 PE=1 SV=2
						0						tr|D3Z8Q5|D3Z8Q5_RAT	+	113	12041	24.29	6	6	293930	0.00945057	1	1	2		12124	RCG25747 OS=Rattus norvegicus OX=10116 GN=Tusc2 PE=4 SV=1
71	146	57.78	2	2	73134	0.00637467	2	2	3	N	67177	Q3KR86|MIC60_RAT	0.5299	141	12	20.78	1	1	105060	0.00337794	1	1	1		67177	MICOS complex subunit Mic60 (Fragment) OS=Rattus norvegicus OX=10116 GN=Immt PE=1 SV=1
53	2801	77.13	8	8	1358900	0.118447	5	5	6	Y	57808	Q02253|MMSA_RAT	-													Methylmalonate-semialdehyde dehydrogenase [acylating], mitochondrial OS=Rattus norvegicus OX=10116 GN=Aldh6a1 PE=1 SV=1
126	10115	28.58	6	6	91401	0.0079669	1	1	1	N	22179	Q9R063|PRDX5_RAT	-													Peroxiredoxin-5, mitochondrial OS=Rattus norvegicus OX=10116 GN=Prdx5 PE=1 SV=1
					1147260004	100													3110183260	100
																			3.11018e+07

## Sheet: RHM Dimer Big difference
Area (IBAQ)	riBAQ	Accession	rIBAQ PTP/Control	Area (IBAQ)	riBAQ	Description
CONTROL	%			PTP	%
Complex I
48874000	4.26006	Q66HF1|NDUS1_RAT	0.339181	44940000	1.44493	NADH-ubiquinone oxidoreductase 75 kDa subunit mitochondrial OS=Rattus norvegicus OX=10116 GN=Ndufs1 PE=1 SV=1
34707000	3.02521	Q641Y2|NDUS2_RAT	0.414393	38990000	1.25362	NADH dehydrogenase [ubiquinone] iron-sulfur protein 2 mitochondrial OS=Rattus norvegicus OX=10116 GN=Ndufs2 PE=1 SV=1
15159000	1.32132	Q5BK63|NDUA9_RAT	0.450073	18496000	0.594692	NADH dehydrogenase [ubiquinone] 1 alpha subcomplex subunit 9 mitochondrial OS=Rattus norvegicus OX=10116 GN=Ndufa9 PE=1 SV=2
19269000	1.67957	tr|B2RYS8|B2RYS8_RAT	0.444833	23237000	0.747126	NADH dehydrogenase [ubiquinone] 1 beta subcomplex subunit 8 mitochondrial OS=Rattus norvegicus OX=10116 GN=Ndufb8 PE=1 SV=1
18181000	1.58473	tr|Q5PQZ9|Q5PQZ9_RAT	0.470499	23190000	0.745615	NADH dehydrogenase [ubiquinone] 1 subunit C2 OS=Rattus norvegicus OX=10116 GN=Ndufc2 PE=1 SV=1
23602000	2.05725	tr|D3ZG43|D3ZG43_RAT	0.299136	19140000	0.615398	NADH dehydrogenase (Ubiquinone) Fe-S protein 3 (Predicted) isoform CRA_c OS=Rattus norvegicus OX=10116 GN=Ndufs3 PE=1 SV=1
8793300	0.766461	Q561S0|NDUAA_RAT	0.344565	8213850	0.264095	NADH dehydrogenase [ubiquinone] 1 alpha subcomplex subunit 10 mitochondrial OS=Rattus norvegicus OX=10116 GN=Ndufa10 PE=1 SV=1
12726000	1.10925	tr|D4A0T0|D4A0T0_RAT	0.371945	12832000	0.41258	NADH:ubiquinone oxidoreductase subunit B10 OS=Rattus norvegicus OX=10116 GN=Ndufb10 PE=1 SV=1
8536000	0.744034	P11661|NU5M_RAT	0.402501	9314200	0.299474	NADH-ubiquinone oxidoreductase chain 5 OS=Rattus norvegicus OX=10116 GN=Mtnd5 PE=3 SV=3
560640	0.0488677	tr|F1LPG5|F1LPG5_RAT	4.59814	6988600	0.224701	NADH:ubiquinone oxidoreductase subunit B4 OS=Rattus norvegicus OX=10116 GN=Ndufb4 PE=1 SV=1
	0	tr|D3ZLT1|D3ZLT1_RAT	+	6726500	0.216273	NADH dehydrogenase (Ubiquinone) 1 beta subcomplex 7 (Predicted) OS=Rattus norvegicus OX=10116 GN=Ndufb7 PE=1 SV=1
262320	0.0228649	tr|D4A3V2|D4A3V2_RAT	4.02002	2858800	0.0919174	NADH dehydrogenase [ubiquinone] 1 alpha subcomplex subunit 6 OS=Rattus norvegicus OX=10116 GN=Ndufa6 PE=1 SV=1
1509700	0.131592	tr|A9UMV9|A9UMV9_RAT	7.24624	29657000	0.953545	NADH:ubiquinone oxidoreductase subunit A7 OS=Rattus norvegicus OX=10116 GN=Ndufa7 PE=1 SV=1
365080	0.0318219	tr|B2RYU0|B2RYU0_RAT	6.47668	6410100	0.2061	NADH dehydrogenase (Ubiquinone) 1 beta subcomplex 2 (Predicted) isoform CRA_b OS=Rattus norvegicus OX=10116 GN=Ndufb2 PE=1 SV=1
2854700	0.248828	P03889|NU1M_RAT	0.337925	2615200	0.0840851	NADH-ubiquinone oxidoreductase chain 1 OS=Rattus norvegicus OX=10116 GN=Mtnd1 PE=1 SV=3
1791600	0.156163	Q63362|NDUA5_RAT	0.382296	1856800	0.0597007	NADH dehydrogenase [ubiquinone] 1 alpha subcomplex subunit 5 OS=Rattus norvegicus OX=10116 GN=Ndufa5 PE=1 SV=3
1041600	0.0907902	tr|B2RYW3|B2RYW3_RAT	0.411971	1163300	0.0374029	NADH dehydrogenase (Ubiquinone) 1 beta subcomplex 9 OS=Rattus norvegicus OX=10116 GN=Ndufb9 PE=1 SV=1
14275000	1.24427	tr|D3ZF13|D3ZF13_RAT	0.407529	15771000	0.507076	Acyl carrier protein OS=Rattus norvegicus OX=10116 GN=Ndufab1 PE=1 SV=1
Complex III
15525000	1.35322	P32551|QCR2_RAT	0.494491	20812000	0.669157	Cytochrome b-c1 complex subunit 2 mitochondrial OS=Rattus norvegicus OX=10116 GN=Uqcrc2 PE=1 SV=2
997010	0.0869036	P20788|UCRI_RAT	4.07642	11018000	0.354256	Cytochrome b-c1 complex subunit Rieske mitochondrial OS=Rattus norvegicus OX=10116 GN=Uqcrfs1 PE=1 SV=2
10042000	0.875303	Q68FY0|QCR1_RAT	0.131577	3582000	0.11517	Cytochrome b-c1 complex subunit 1 mitochondrial OS=Rattus norvegicus OX=10116 GN=Uqcrc1 PE=1 SV=1
3117800	0.271761	P00159|CYB_RAT	0.231571	1957300	0.062932	Cytochrome b OS=Rattus norvegicus OX=10116 GN=Mt-Cyb PE=3 SV=3
314440	0.0274079	Q5M9I5|QCR6_RAT	3.67687	3134300	0.100775	Cytochrome b-c1 complex subunit 6 mitochondrial OS=Rattus norvegicus OX=10116 GN=Uqcrh PE=3 SV=1
	0	Q7TQ16|QCR8_RAT	+	727260	0.0233832	Cytochrome b-c1 complex subunit 8 OS=Rattus norvegicus OX=10116 GN=Uqcrq PE=3 SV=1
	0	tr|B2RYS2|B2RYS2_RAT	+	480600	0.0154525	Cytochrome b-c1 complex subunit 7 OS=Rattus norvegicus OX=10116 GN=Uqcrb PE=1 SV=1
Complex IV
6358700	0.554251	P00406|COX2_RAT	0.258432	4454900	0.143236	Cytochrome c oxidase subunit 2 OS=Rattus norvegicus OX=10116 GN=Mtco2 PE=1 SV=3
321550	0.0280276	P80432|COX7C_RAT	5.45421	4754500	0.152869	Cytochrome c oxidase subunit 7C mitochondrial OS=Rattus norvegicus OX=10116 GN=Cox7c PE=1 SV=2
4296900	0.374536	P11240|COX5A_RAT	0.190544	2219600	0.0713656	Cytochrome c oxidase subunit 5A mitochondrial OS=Rattus norvegicus OX=10116 GN=Cox5a PE=1 SV=1
105120	0.0091627	P05503|COX1_RAT	2.13937	609670	0.0196024	Cytochrome c oxidase subunit 1 OS=Rattus norvegicus OX=10116 GN=Mtco1 PE=2 SV=3
44810	0.00390583	P35171|CX7A2_RAT	9.50622	1154800	0.0371296	Cytochrome c oxidase subunit 7A2 mitochondrial OS=Rattus norvegicus OX=10116 GN=Cox7a2 PE=1 SV=1
2010600	0.175252	P10888|COX41_RAT	0.151781	827310	0.0266	Cytochrome c oxidase subunit 4 isoform 1 mitochondrial OS=Rattus norvegicus OX=10116 GN=Cox4i1 PE=1 SV=1
151450	0.013201	P05505|COX3_RAT	-	0	0	Cytochrome c oxidase subunit 3 OS=Rattus norvegicus OX=10116 GN=Mtco3 PE=1 SV=5
	0	P11951|CX6C2_RAT	+	427700	0.0137516	Cytochrome c oxidase subunit 6C-2 OS=Rattus norvegicus OX=10116 GN=Cox6c2 PE=1 SV=3
92435	0.00805702	P80431|COX7B_RAT	0.466383	116870	0.00375766	Cytochrome c oxidase subunit 7B mitochondrial OS=Rattus norvegicus OX=10116 GN=Cox7b PE=1 SV=3
46814	0.0040805	tr|B2RZD6|B2RZD6_RAT	8.56268	1086700	0.0349401	NDUFA4 mitochondrial complex-associated OS=Rattus norvegicus OX=10116 GN=Ndufa4 PE=1 SV=1
Complex V					0
7095700	0.618491	Q06647|ATPO_RAT	2.16254	41599000	1.33751	ATP synthase subunit O mitochondrial OS=Rattus norvegicus OX=10116 GN=Atp5po PE=1 SV=1
	0	P29419|ATP5I_RAT	+	10020000	0.322168	ATP synthase subunit e mitochondrial OS=Rattus norvegicus OX=10116 GN=Atp5me PE=1 SV=3
	0	D3ZAF6|ATPK_RAT	+	1883500	0.0605591	ATP synthase subunit f mitochondrial OS=Rattus norvegicus OX=10116 GN=Atp5mf PE=1 SV=1
Others
127850	0.0111439	Q05962|ADT1_RAT	4.4507	1542600	0.0495984	ADP/ATP translocase 1 OS=Rattus norvegicus OX=10116 GN=Slc25a4 PE=1 SV=3
1180300	0.10288	Q64428|ECHA_RAT	0.194006	620770	0.0199593	Trifunctional enzyme subunit alpha mitochondrial OS=Rattus norvegicus OX=10116 GN=Hadha PE=1 SV=2
2626900	0.228972	Q5M934|TRUB1_RAT	2.39488	17055000	0.54836	Probable tRNA pseudouridine synthase 1 OS=Rattus norvegicus OX=10116 GN=Trub1 PE=2 SV=1
2297500	0.20026	P02563|MYH6_RAT	0.239	1488600	0.0478621	Myosin-6 OS=Rattus norvegicus OX=10116 GN=Myh6 PE=1 SV=2
3542500	0.308779	Q5XIH7|PHB2_RAT	0.183348	1760800	0.056614	Prohibitin-2 OS=Rattus norvegicus OX=10116 GN=Phb2 PE=1 SV=1
	0	B0BN56|RT31_RAT	+	244140	0.0078497	28S ribosomal protein S31 mitochondrial OS=Rattus norvegicus OX=10116 GN=Mrps31 PE=2 SV=1
649530	0.0566158	Q9ER34|ACON_RAT	0.336456	592450	0.0190487	Aconitate hydratase mitochondrial OS=Rattus norvegicus OX=10116 GN=Aco2 PE=1 SV=2
1100400	0.0959155	P17764|THIL_RAT	0.432764	1291000	0.0415088	Acetyl-CoA acetyltransferase mitochondrial OS=Rattus norvegicus OX=10116 GN=Acat1 PE=1 SV=1
	0	P11530|DMD_RAT	+	2253100	0.0724427	Dystrophin
	0	tr|Q4G067|Q4G067_RAT	+	361430	0.0116209	Mitochondrial ribosomal protein L44 OS=Rattus norvegicus OX=10116 GN=Mrpl44 PE=1 SV=1
	0	Q9Z0V6|PRDX3_RAT	+	356470	0.0114614	Thioredoxin-dependent peroxide reductase mitochondrial OS=Rattus norvegicus OX=10116 GN=Prdx3 PE=1 SV=2
	0	tr|D4A4B1|D4A4B1_RAT	+	139410	0.00448237	Mitochondrial ribosomal protein L15 OS=Rattus norvegicus OX=10116 GN=Mrpl15 PE=1 SV=2
	0	tr|D3Z8Q5|D3Z8Q5_RAT	+	293930	0.00945057	RCG25747 OS=Rattus norvegicus OX=10116 GN=Tusc2 PE=4 SV=1
1358900	0.118447	Q02253|MMSA_RAT	-			Methylmalonate-semialdehyde dehydrogenase [acylating], mitochondrial OS=Rattus norvegicus OX=10116 GN=Aldh6a1 PE=1 SV=1
91401	0.0079669	Q9R063|PRDX5_RAT	-			Peroxiredoxin-5, mitochondrial OS=Rattus norvegicus OX=10116 GN=Prdx5 PE=1 SV=1

## Sheet: RHM monomer All
Protein Group	Protein ID	-10lgP	Coverage (%)	Coverage (%) Sample 1	Area (IBAQ)	riBAQ	#Peptides	#Unique	#Spec Sample 1	PTM	Avg. Mass	Accession	rIBAQ PTP/Control	Protein Group	Protein ID	-10lgP	Coverage (%)	Coverage (%) Sample 1	Area (IBAQ)	riBAQ	#Peptides	#Unique	#Spec Sample 1	PTM	Avg. Mass
					CONTROL	%													PTP	%
Complex III
17	34	63.27	8	8	1024500	0.0446619	4	4	6	N	48396	P32551|QCR2_RAT	1.20973	20	50	77.02	5	5	2756400	0.0540291	4	4	10		29446	Cytochrome b-c1 complex subunit 2 mitochondrial OS=Rattus norvegicus OX=10116 GN=Uqcrc2 PE=1 SV=2
75	132	74.5	5	5	276840	0.0120685	1	1	1	N	29446	P20788|UCRI_RAT	2.1046	29	58	126.55	5	5	1295800	0.0253994	2	2	4		48396	Cytochrome b-c1 complex subunit 1 mitochondrial OS=Rattus norvegicus OX=10116 GN=Uqcrc1 PE=1 SV=1
						0						Q5M9I5|QCR6_RAT	+	32	318	34.77	17	17	864070	0.0169369	1	1	4		52849	Cytochrome b-c1 complex subunit 6 mitochondrial OS=Rattus norvegicus OX=10116 GN=Uqcrh PE=3 SV=1
35	118	37.65	4	4	60256	0.00262679	2	2	2	N	52849	Q68FY0|QCR1_RAT	6.68221	70	25	53.21	4	4	895490	0.0175528	2	2	2		10424	Cytochrome b (Fragment) OS=Rattus norvegicus OX=10116 GN=Cytb PE=3 SV=1
18	79	51.39	8	8	1491900	0.0650377	3	3	6	N	43012	P00159|CYB_RAT	0.042248	97	130	21.45	3	3	140180	0.00274771	1	1	1		43012	Cytochrome b OS=Rattus norvegicus OX=10116 PE=3 SV=1
																				0
Complex IV																				0
16	27	69.65	17	17	843160	0.0367566	5	5	6	Y	25928	P00406|COX2_RAT	1.6828	14	34	99.64	27	27	3155600	0.0618539	8	8	17	Oxidation (M)	25928	Cytochrome c oxidase subunit 2 OS=Rattus norvegicus OX=10116 GN=Mtco2 PE=1 SV=3
21	133	93.16	5	5	1386800	0.060456	2	2	6	N	35435	tr|D3ZFQ8|D3ZFQ8_RAT	0.917847	17	59	142.67	13	13	2830900	0.0554894	5	5	12		35435	Cytochrome c-1 OS=Rattus norvegicus OX=10116 GN=Cyc1 PE=1 SV=3
19	86	82.98	16	16	571600	0.0249183	3	3	6	N	16130	P11240|COX5A_RAT	0.72699	21	200	118.98	23	23	924190	0.0181153	6	6	10		16130	Cytochrome c oxidase subunit 5A mitochondrial OS=Rattus norvegicus OX=10116 GN=Cox5a PE=1 SV=1
66	151	44370	12	12	214450	0.00934871	1	1	1	N	10487	P10817|CX6A2_RAT	4.58147	24	253	48.06	12	12	2185100	0.0428308	2	2	6		10487	Cytochrome c oxidase subunit 6A2 mitochondrial (Fragment) OS=Rattus norvegicus OX=10116 GN=Cox6a2 PE=1 SV=3
38	139	28.66	9	9	516610	0.022521	1	1	2	N	13915	P12075|COX5B_RAT	1.28099	38	151	30.38	11	11	1471800	0.0288492	2	2	3		13915	Cytochrome c oxidase subunit 5B mitochondrial OS=Rattus norvegicus OX=10116 GN=Cox5b PE=1 SV=2
						0						P35171|CX7A2_RAT	+	43	263	89.33	12	12	748420	0.01467	2	2	3		9353	Cytochrome c oxidase subunit 7A2 mitochondrial OS=Rattus norvegicus OX=10116 GN=Cox7a2 PE=1 SV=1
76	134	57.04	21	21	152490	0.00664763	1	1	1	N	7375	P80432|COX7C_RAT	2.63978	52	251	78.41	21	21	895260	0.0175483	1	1	3		7375	Cytochrome c oxidase subunit 7C mitochondrial OS=Rattus norvegicus OX=10116 GN=Cox7c PE=1 SV=2
												P05505|COX3_RAT	+	77	270	67.76	3	3	413690	0.00810887	2	2	2		29871	Cytochrome c oxidase subunit 3 OS=Rattus norvegicus OX=10116 GN=Mtco3 PE=1 SV=5
						0						tr|B2RZD6|B2RZD6_RAT	+	47	209	37.86	10	10	119080	0.00233412	2	2	3		9327	NDUFA4 mitochondrial complex-associated OS=Rattus norvegicus OX=10116 GN=Ndufa4 PE=1 SV=1
Complex V																				0
2	1	387.46	60	60	1157500000	50.4599	170	170	874	Y	56354	P10719|ATPB_RAT	1.04711	1	5	412.63	52	52	2695600000	52.8373	151	148	1008	Oxidation (M)	56354	ATP synthase subunit beta mitochondrial OS=Rattus norvegicus OX=10116 GN=Atp5f1b PE=1 SV=2
1	3	338.57	58	58	716370000	31.2294	168	166	907	Y	59754	P15999|ATPA_RAT	0.928241	2	8	351.84	44	44	1478900000	28.9884	147	143	897	Carbamidomethylation		ATP synthase subunit alpha, mitochondrial
4	7	278.21	65	65	85852000	3.74262	41	40	154	Y	18763	P31399|ATP5H_RAT	1.06192	3	65	317.64	66	66	202760000	3.97436	47	46	200	Oxidation (M)		ATP synthase subunit d, mitochondrial
3	5	280.45	43	43	102670000	4.47579	46	46	221	Y	30191	P35435|ATPG_RAT	0.657306	4	63	297.5	48	48	150090000	2.94196	47	47	172	Carbamidomethylation		ATP synthase subunit gamma, mitochondrial
7	10	167.95	23	23	85675000	3.73491	21	21	64	Y	28869	P19511|AT5F1_RAT	1.32573	5	168	208.61	32	32	252610000	4.95149	32	31	128	Formylation	28869	ATP synthase F(0) complex subunit B1 mitochondrial OS=Rattus norvegicus OX=10116 GN=Atp5pb PE=1 SV=1
5	8	159.85	38	38	30283000	1.32015	21	21	71	Y	23398	Q06647|ATPO_RAT	1.64528	6	76	199.86	42	42	110810000	2.17202	34	33	116	Carbamidomethylation		ATP synthase subunit O, mitochondrial
6	11	171.31	45	45	22118000	0.96421	19	19	67	Y	11433	Q6PDU7|ATP5L_RAT	1.56705	7	75	186.13	50	50	77085000	1.51097	22	22	103	Oxidation (M)	11433	ATP synthase subunit g mitochondrial OS=Rattus norvegicus OX=10116 GN=Atp5mg PE=1 SV=2
14	31	91.6	49	49	2316400	0.100981	6	6	17	N	8255	P29419|ATP5I_RAT	6.24798	8	319	157.03	65	65	32188000	0.630927	17	17	54	Oxidation (M)	8255	ATP synthase subunit e mitochondrial OS=Rattus norvegicus OX=10116 GN=Atp5me PE=1 SV=3
11	15	90.42	27	27	3492600	0.152256	8	8	22	Y	25076	P05504|ATP6_RAT	1.37519	10	258	74.9	18	18	10682000	0.209381	7	7	28	Oxidation (M)	25076	ATP synthase subunit a OS=Rattus norvegicus OX=10116 GN=Mt-atp6 PE=1 SV=3
10	30	159.19	39	39	4939200	0.215319	10	10	25	N	12494	P21571|ATP5J_RAT	0.696063	11	12037	170.28	49	49	7646200	0.149876	13	12	28	Oxidation (M)	12494	ATP synthase-coupling factor 6 mitochondrial OS=Rattus norvegicus OX=10116 GN=Atp5pf PE=1 SV=1
8	12	162.91	33	33	18902000	0.824012	13	13	47	Y	17563	tr|G3V7Y3|G3V7Y3_RAT	0.454915	12	3953	105.59	19	19	19124000	0.374856	9	9	25		17563	ATP synthase subunit delta mitochondrial OS=Rattus norvegicus OX=10116 GN=Atp5f1d PE=1 SV=1
9	32	134.38	48	48	45606000	1.98814	8	8	32	Y	7642	tr|Q5UAJ5|Q5UAJ5_RAT	0.16724	16	233	111.96	28	28	16963000	0.332497	5	5	14	Oxidation (M)	7642	ATP synthase protein 8 OS=Rattus norvegicus OX=10116 GN=ATP8 PE=3 SV=1
24	85	31.38	24	24	380940	0.0166067	3	3	3	Y	10452	D3ZAF6|ATPK_RAT	4.6715	19	12050	50.42	20	20	3957800	0.0775781	6	6	10	Oxidation (M)	10452	ATP synthase subunit f mitochondrial OS=Rattus norvegicus OX=10116 GN=Atp5mf PE=1 SV=1
28	89	45.84	33	33	927040	0.0404133	2	2	3	N	6408	Q9JJW3|ATPMD_RAT	2.74905	22	12038	61.59	40	40	5667900	0.111098	4	4	7		6408	ATP synthase membrane subunit DAPIT mitochondrial OS=Rattus norvegicus OX=10116 GN=Atp5md PE=1 SV=1
												D3Z9R8|ATP68_RAT	+	54	12095	22.95	8	8	2296500	0.0450144	1	1	3		6914	ATP synthase subunit ATP5MPL mitochondrial OS=Rattus norvegicus OX=10116 GN=Atp5mpl PE=1 SV=1
																				0
Others																				0
15	19	126.2	12	12	2748600	0.119822	7	7	16	Y	47314	P00507|AATM_RAT	1.22664	9	45	175.16	17	17	7498400	0.146979	13	13	32	Oxidation (M)	47314	Aspartate aminotransferase mitochondrial OS=Rattus norvegicus OX=10116 GN=Got2 PE=1 SV=2
13	20	115.62	15	15	2834100	0.123549	11	11	19	N	51414	Q60587|ECHB_RAT	0.449285	13	29	131.94	14	14	2831900	0.055509	12	12	20		51414	Trifunctional enzyme subunit beta mitochondrial OS=Rattus norvegicus OX=10116 GN=Hadhb PE=1 SV=1
12	9	127.39	8	8	3637100	0.158555	11	11	21	N	82665	Q64428|ECHA_RAT	0.201557	18	21	102.43	8	8	1630400	0.031958	7	7	11		82665	Trifunctional enzyme subunit alpha mitochondrial OS=Rattus norvegicus OX=10116 GN=Hadha PE=1 SV=2
25	88	60.11	3	3	552340	0.0240787	2	2	3	N	85433	Q9ER34|ACON_RAT	0.359388	26	17	79.49	3	3	441480	0.00865359	3	3	5		85433	Aconitate hydratase mitochondrial OS=Rattus norvegicus OX=10116 GN=Aco2 PE=1 SV=2
34	84	63.37	6	6	412600	0.0179868	2	2	2	Y	47385	P09605|KCRS_RAT	0.439739	31	46	46.99	7	7	403520	0.00790952	3	3	4		47385	Creatine kinase S-type mitochondrial OS=Rattus norvegicus OX=10116 GN=Ckmt2 PE=1 SV=2
77	138	30.76	2	2	143510	0.00625616	1	1	1	N	88217	Q63704|CPT1B_RAT	1.82085	42	61	77.4	2	2	581160	0.0113915	2	2	3		88217	Carnitine O-palmitoyltransferase 1 muscle isoform OS=Rattus norvegicus OX=10116 GN=Cpt1b PE=1 SV=1
						0						Q9Z0V6|PRDX3_RAT	+	51	316	77.98	8	8	974260	0.0190968	2	2	3		28295	Thioredoxin-dependent peroxide reductase mitochondrial OS=Rattus norvegicus OX=10116 GN=Prdx3 PE=1 SV=2
						0						O55207|SYNJ2_RAT	+	55	647	29.35	1	1	142720	0.0027975	2	2	3		165263	Synaptojanin-2 OS=Rattus norvegicus OX=10116 GN=Synj2 PE=1 SV=2
						0						P13086|SUCA_RAT	+	71	144	32.88	6	6	124000	0.00243056	2	2	2		36148	Succinate--CoA ligase [ADP/GDP-forming] subunit alpha mitochondrial OS=Rattus norvegicus OX=10116 GN=Suclg1 PE=2 SV=2
						0						P45953|ACADV_RAT	+	72	31	51.63	3	3	354850	0.00695553	2	2	2		70749	Very long-chain specific acyl-CoA dehydrogenase mitochondrial OS=Rattus norvegicus OX=10116 GN=Acadvl PE=1 SV=1
												Q9R1Z0|VDAC3_RAT	+	41	158	31.48	8	8	1639400	0.0321344	2	2	3	Formylation	30798	Voltage-dependent anion-selective channel protein 3 OS=Rattus norvegicus OX=10116 GN=Vdac3 PE=1 SV=2
						100													5101698470	100
																			5.1017e+07

## Sheet: RHM Monomer Big Difference
Area (IBAQ)	riBAQ	Accession	rIBAQ PTP/Control	Area (IBAQ)	riBAQ
CONTROL	%			PTP	%
Complex III
276840	0.0120685	P20788|UCRI_RAT	2.1046	1295800	0.0253994	Cytochrome b-c1 complex subunit 1 mitochondrial OS=Rattus norvegicus OX=10116 GN=Uqcrc1 PE=1 SV=1
	0	Q5M9I5|QCR6_RAT	+	864070	0.0169369	Cytochrome b-c1 complex subunit 6 mitochondrial OS=Rattus norvegicus OX=10116 GN=Uqcrh PE=3 SV=1
60256	0.00262679	Q68FY0|QCR1_RAT	6.68221	895490	0.0175528	Cytochrome b (Fragment) OS=Rattus norvegicus OX=10116 GN=Cytb PE=3 SV=1
1491900	0.0650377	P00159|CYB_RAT	0.042248	140180	0.00274771	Cytochrome b OS=Rattus norvegicus OX=10116 PE=3 SV=1
					0
Complex IV					0
214450	0.00934871	P10817|CX6A2_RAT	4.58147	2185100	0.0428308	Cytochrome c oxidase subunit 6A2 mitochondrial (Fragment) OS=Rattus norvegicus OX=10116 GN=Cox6a2 PE=1 SV=3
	0	P35171|CX7A2_RAT	+	748420	0.01467	Cytochrome c oxidase subunit 7A2 mitochondrial OS=Rattus norvegicus OX=10116 GN=Cox7a2 PE=1 SV=1
152490	0.00664763	P80432|COX7C_RAT	2.63978	895260	0.0175483	Cytochrome c oxidase subunit 7C mitochondrial OS=Rattus norvegicus OX=10116 GN=Cox7c PE=1 SV=2
		P05505|COX3_RAT	+	413690	0.00810887	Cytochrome c oxidase subunit 3 OS=Rattus norvegicus OX=10116 GN=Mtco3 PE=1 SV=5
	0	tr|B2RZD6|B2RZD6_RAT	+	119080	0.00233412	NDUFA4 mitochondrial complex-associated OS=Rattus norvegicus OX=10116 GN=Ndufa4 PE=1 SV=1
Complex V					0
2316400	0.100981	P29419|ATP5I_RAT	6.24798	32188000	0.630927	ATP synthase subunit e mitochondrial OS=Rattus norvegicus OX=10116 GN=Atp5me PE=1 SV=3
18902000	0.824012	tr|G3V7Y3|G3V7Y3_RAT	0.454915	19124000	0.374856	ATP synthase subunit delta mitochondrial OS=Rattus norvegicus OX=10116 GN=Atp5f1d PE=1 SV=1
45606000	1.98814	tr|Q5UAJ5|Q5UAJ5_RAT	0.16724	16963000	0.332497	ATP synthase protein 8 OS=Rattus norvegicus OX=10116 GN=ATP8 PE=3 SV=1
380940	0.0166067	D3ZAF6|ATPK_RAT	4.6715	3957800	0.0775781	ATP synthase subunit f mitochondrial OS=Rattus norvegicus OX=10116 GN=Atp5mf PE=1 SV=1
927040	0.0404133	Q9JJW3|ATPMD_RAT	2.74905	5667900	0.111098	ATP synthase membrane subunit DAPIT mitochondrial OS=Rattus norvegicus OX=10116 GN=Atp5md PE=1 SV=1
		D3Z9R8|ATP68_RAT	+	2296500	0.0450144	ATP synthase subunit ATP5MPL mitochondrial OS=Rattus norvegicus OX=10116 GN=Atp5mpl PE=1 SV=1
					0
Others					0
2834100	0.123549	Q60587|ECHB_RAT	0.449285	2831900	0.055509	Trifunctional enzyme subunit beta mitochondrial OS=Rattus norvegicus OX=10116 GN=Hadhb PE=1 SV=1
3637100	0.158555	Q64428|ECHA_RAT	0.201557	1630400	0.031958	Trifunctional enzyme subunit alpha mitochondrial OS=Rattus norvegicus OX=10116 GN=Hadha PE=1 SV=2
552340	0.0240787	Q9ER34|ACON_RAT	0.359388	441480	0.00865359	Aconitate hydratase mitochondrial OS=Rattus norvegicus OX=10116 GN=Aco2 PE=1 SV=2
412600	0.0179868	P09605|KCRS_RAT	0.439739	403520	0.00790952	Creatine kinase S-type mitochondrial OS=Rattus norvegicus OX=10116 GN=Ckmt2 PE=1 SV=2
	0	Q9Z0V6|PRDX3_RAT	+	974260	0.0190968	Thioredoxin-dependent peroxide reductase mitochondrial OS=Rattus norvegicus OX=10116 GN=Prdx3 PE=1 SV=2
	0	O55207|SYNJ2_RAT	+	142720	0.0027975	Synaptojanin-2 OS=Rattus norvegicus OX=10116 GN=Synj2 PE=1 SV=2
	0	P13086|SUCA_RAT	+	124000	0.00243056	Succinate--CoA ligase [ADP/GDP-forming] subunit alpha mitochondrial OS=Rattus norvegicus OX=10116 GN=Suclg1 PE=2 SV=2
	0	P45953|ACADV_RAT	+	354850	0.00695553	Very long-chain specific acyl-CoA dehydrogenase mitochondrial OS=Rattus norvegicus OX=10116 GN=Acadvl PE=1 SV=1
		Q9R1Z0|VDAC3_RAT	+	1639400	0.0321344	Voltage-dependent anion-selective channel protein 3 OS=Rattus norvegicus OX=10116 GN=Vdac3 PE=1 SV=2

## Sheet: RLM SM-BM Dimer All
Protein Group	Protein ID	-10lgP	Coverage (%)	Coverage (%) Sample 1	Area (IBAQ)	riBAQ	#Peptides	#Unique	#Spec Sample 1	PTM	Avg. Mass	Accession	rIBAQ PTP/Control	Protein Group	Protein ID	-10lgP	Coverage (%)	Coverage (%) Sample 1	Area (IBAQ)	riBAQ	#Peptides	#Unique	#Spec Sample 1	PTM	Avg. Mass	Description
					CONTROL	%													PTP	%
Complex I
11	10	253.84	21	21	32389000	1.37376	42	42	67		79412	Q66HF1|NDUS1_RAT	0.523734	12	13	210.51	20	20	13976000	0.719486	31	31	42		79412	NADH-ubiquinone oxidoreductase 75 kDa subunit mitochondrial OS=Rattus norvegicus OX=10116 GN=Ndufs1 PE=1 SV=1
15	30	231.93	36	36	26646000	1.13018	24	24	47		27378	P19234|NDUV2_RAT	1.07094	11	20	218.11	39	39	23511000	1.21035	29	29	49	Formylation	27378	NADH dehydrogenase [ubiquinone] flavoprotein 2 mitochondrial OS=Rattus norvegicus OX=10116 GN=Ndufv2 PE=1 SV=2
16	26	214.17	28	28	13080000	0.554781	23	23	45	Oxidation (M)	52562	Q641Y2|NDUS2_RAT	1.02296	17	19	183.77	28	28	11024000	0.567516	23	23	31	Oxidation (M)	52562	NADH dehydrogenase [ubiquinone] iron-sulfur protein 2 mitochondrial OS=Rattus norvegicus OX=10116 GN=Ndufs2 PE=1 SV=1
17	9	223.35	36	36	8186200	0.347213	28	25	41		42559	Q5BK63|NDUA9_RAT	0.883505	18	7	182.64	32	32	5958900	0.306765	22	21	29		42559	NADH dehydrogenase [ubiquinone] 1 alpha subcomplex subunit 9 mitochondrial OS=Rattus norvegicus OX=10116 GN=Ndufa9 PE=1 SV=2
20	24	165.05	34	34	9942300	0.421697	20	20	30		30226	tr|D3ZG43|D3ZG43_RAT	0.861397	20	28	157.32	33	33	7056100	0.363249	18	18	24		30226	NADH dehydrogenase (Ubiquinone) Fe-S protein 3 (Predicted) isoform CRA_c OS=Rattus norvegicus OX=10116 GN=Ndufs3 PE=1 SV=1
27	138	139.23	15	15	3192400	0.135404	13	12	21	Oxidation (M)		P05508|NU4M_RAT	0.259484	40	147	82.09	9	9	682500	0.0351352	6	6	9		51783	NADH-ubiquinone oxidoreductase chain 4
28	37	173.28	14	14	6381700	0.270676	15	15	21		68618	P11661|NU5M_RAT	-							0						NADH-ubiquinone oxidoreductase chain 5 OS=Rattus norvegicus OX=10116 GN=Mtnd5 PE=3 SV=3
29	23	140.68	14	14	12894000	0.546892	10	10	21		50731	tr|Q5XIH3|Q5XIH3_RAT	0.789514	28	43	115.48	11	11	8387300	0.431779	8	8	16	Formylation	50731	NADH dehydrogenase [ubiquinone] flavoprotein 1 mitochondrial OS=Rattus norvegicus OX=10116 GN=Ndufv1 PE=1 SV=1
33	42	155.37	35	35	5591900	0.237177	12	12	19		20859	tr|D4A0T0|D4A0T0_RAT	0.989632	35	66	129.03	33	33	4559400	0.234718	8	8	11	Oxidation (M)	20859	NADH:ubiquinone oxidoreductase subunit B10 OS=Rattus norvegicus OX=10116 GN=Ndufb10 PE=1 SV=1
36	28	115.14	17	17	2303820	0.0977152	11	3	17	Oxidation (M)	40493	Q561S0|NDUAA_RAT	1.86026	44	57	113.27	15	15	3531000	0.181776	7	7	9	Oxidation (M)	40493	NADH dehydrogenase [ubiquinone] 1 alpha subcomplex subunit 10 mitochondrial OS=Rattus norvegicus OX=10116 GN=Ndufa10 PE=1 SV=1
39	183	174.56	32	32	6257400	0.265404	9	9	14		17634	tr|D4A7L4|D4A7L4_RAT	1.34352	39	137	138.67	26	26	6926500	0.356577	7	7	10		17634	NADH dehydrogenase (Ubiquinone) 1 beta subcomplex 11 (Predicted) OS=Rattus norvegicus OX=10116 GN=Ndufb11 PE=1 SV=1
40	242	150.7	21	21	6208400	0.263326	9	9	14		14854	Q80W89|NDUAB_RAT	0.95959	49	181	125.66	18	18	4908400	0.252685	6	6	8		14854	NADH dehydrogenase [ubiquinone] 1 alpha subcomplex subunit 11 OS=Rattus norvegicus OX=10116 GN=Ndufa11 PE=2 SV=1
42	135	152.14	20	20	3395700	0.144027	13	11	13		23970	tr|B0BNE6|B0BNE6_RAT	0.534257	50	55	125.8	16	16	1494700	0.0769473	7	6	8		23970	NADH dehydrogenase (Ubiquinone) Fe-S protein 8 (Predicted) isoform CRA_a OS=Rattus norvegicus OX=10116 GN=Ndufs8 PE=1 SV=1
44	110	125.01	19	19	3866200	0.163983	6	6	13		19965	tr|A0A0G2JVL6|A0A0G2JVL6_RAT	0.485533	37	34	110.04	25	25	1546600	0.0796191	6	6	11		19965	NADH dehydrogenase [ubiquinone] 1 alpha subcomplex subunit 8 OS=Rattus norvegicus OX=10116 GN=Ndufa8 PE=1 SV=1
45	45	188.09	25	25	3771400	0.159962	8	8	12		21959	tr|B2RYS8|B2RYS8_RAT	1.48881	32	49	187.03	21	21	4626100	0.238152	11	11	15	Oxidation (M)	21959	NADH dehydrogenase [ubiquinone] 1 beta subcomplex subunit 8 mitochondrial OS=Rattus norvegicus OX=10116 GN=Ndufb8 PE=1 SV=1
47	246	167.44	27	27	10909000	0.462699	7	7	12		14359	tr|Q5PQZ9|Q5PQZ9_RAT	0.6873	34	204	160.2	30	30	6177400	0.318013	10	10	14		14359	NADH dehydrogenase [ubiquinone] 1 subunit C2 OS=Rattus norvegicus OX=10116 GN=Ndufc2 PE=1 SV=1
48	254	83.44	12	12	1390100	0.0589603	6	6	11		38653	P11662|NU2M_RAT	-							0						NADH-ubiquinone oxidoreductase chain 2 OS=Rattus norvegicus OX=10116 GN=Mtnd2 PE=3 SV=3
50	172	77.13	18	18	1749900	0.074221	8	8	11	Oxidation (M)	36145	P03889|NU1M_RAT	0.557492	77	226	53.86	7	7	803760	0.0413776	3	3	3		36145	NADH-ubiquinone oxidoreductase chain 1 OS=Rattus norvegicus OX=10116 GN=Mtnd1 PE=1 SV=3
51	165	153.9	24	24	1724700	0.0731522	6	6	10		21664	tr|D4A565|D4A565_RAT	2.34352	41	58	147.34	21	21	3330100	0.171434	7	7	9		21664	NADH dehydrogenase (Ubiquinone) 1 beta subcomplex 5 (Predicted) isoform CRA_b OS=Rattus norvegicus OX=10116 GN=Ndufb5 PE=1 SV=1
55	111	112.51	12	12	3596400	0.152539	5	5	8		19741	Q5XIF3|NDUS4_RAT	0.850333	38	138	114.98	22	22	2519600	0.129709	8	8	10		19741	NADH dehydrogenase [ubiquinone] iron-sulfur protein 4 mitochondrial OS=Rattus norvegicus OX=10116 GN=Ndufs4 PE=1 SV=1
57	175	124.09	21	21	2150400	0.091208	5	5	8		13040	tr|D3ZCZ9|D3ZCZ9_RAT	0.968779	57	142	118.49	21	21	1716400	0.0883604	5	5	7		13040	NADH dehydrogenase [ubiquinone] iron-sulfur protein 6 mitochondrial OS=Rattus norvegicus OX=10116 GN=LOC100912599 PE=1 SV=1
64	133	132.26	19	19	2143500	0.0909154	4	4	7		15064	tr|F1LPG5|F1LPG5_RAT	0.495048	126	145	80.25	11	11	874270	0.0450075	2	2	2		15064	NADH:ubiquinone oxidoreductase subunit B4 OS=Rattus norvegicus OX=10116 GN=Ndufb4 PE=1 SV=1
69	148	72.84	14	14	1523200	0.0646057	4	4	6	Oxidation (M)	23945	tr|Q5RJN0|Q5RJN0_RAT	0.648417	59	194	95.2	15	15	813740	0.0418914	5	5	5	Oxidation (M)	23945	NADH dehydrogenase (Ubiquinone) Fe-S protein 7 OS=Rattus norvegicus OX=10116 GN=Ndufs7 PE=1 SV=1
70	168	113.54	21	21	1699500	0.0720833	4	4	6		17178	tr|F1LXA0|F1LXA0_RAT	1.12075	62	249	101.36	21	21	1569300	0.0807877	4	4	5		17178	NADH dehydrogenase [ubiquinone] 1 alpha subcomplex subunit 12 OS=Rattus norvegicus OX=10116 GN=Ndufa12 PE=1 SV=2
78	178	77.4	12	12	702550	0.0297983	3	3	5		15638	tr|D3ZZ21|D3ZZ21_RAT	3.00364	60	135	83.7	27	27	1738600	0.0895033	4	4	5		15638	NADH dehydrogenase (Ubiquinone) 1 beta subcomplex 6 (Predicted) OS=Rattus norvegicus OX=10116 GN=Ndufb6 PE=1 SV=1
81	112	101.94	28	28	789400	0.033482	4	4	4		15224	tr|D4A3V2|D4A3V2_RAT	2.33	53	41	111.96	29	29	1515400	0.0780129	7	7	7	Oxidation (M)	15224	NADH dehydrogenase [ubiquinone] 1 alpha subcomplex subunit 6 OS=Rattus norvegicus OX=10116 GN=Ndufa6 PE=1 SV=1
84	286	38.55	11	11	1823200	0.07733	1	1	4		12500	tr|A9UMV9|A9UMV9_RAT	1.57303	63	245	71.05	19	19	2362900	0.121642	2	2	5		12500	NADH:ubiquinone oxidoreductase subunit A7 OS=Rattus norvegicus OX=10116 GN=Ndufa7 PE=1 SV=1
89	196	102.41	18	18	2143700	0.0909238	4	4	4		13412	Q63362|NDUA5_RAT	0.288026	83	133	44.2	22	22	508710	0.0261884	3	2	3		13412	NADH dehydrogenase [ubiquinone] 1 alpha subcomplex subunit 5 OS=Rattus norvegicus OX=10116 GN=Ndufa5 PE=1 SV=3
152	282	52.35	29	29	1471600	0.0624171	2	2	2	Oxidation (M)	10170	tr|A0A0G2KAA3|A0A0G2KAA3_RAT	-	106	259	76.64	29	29	0	0	2	2	2	Oxidation (M)	10170	NADH:ubiquinone oxidoreductase subunit A3 OS=Rattus norvegicus OX=10116 GN=Ndufa3 PE=1 SV=1
157	119	56.6	7	7	173420	0.00735551	2	2	2		16777	tr|D3ZE15|D3ZE15_RAT	4.51166	88	65	69.36	19	19	644630	0.0331856	3	3	3	Oxidation (M)	16777	NADH:ubiquinone oxidoreductase subunit A13 OS=Rattus norvegicus OX=10116 GN=Ndufa13 PE=1 SV=1
260	243	49.55	11	11	274870	0.0116585	1	1	1		10845	tr|D3ZS58|D3ZS58_RAT	2.83721	85	346	71.84	23	23	642530	0.0330775	3	3	3		10845	NADH dehydrogenase [ubiquinone] 1 alpha subcomplex subunit 2 OS=Rattus norvegicus OX=10116 GN=Ndufa2 PE=1 SV=1
262	350	39.48	13	13	155530	0.00659672	1	1	1		8389	tr|Q35733|Q35733_RAT	0.71838	268	5783	32.1	13	13	92054	0.00473895	1	1	1		8389	NADH-ubiquinone oxidoreductase chain 6 (Fragment) OS=Rattus norvegicus OX=10116 PE=3 SV=1
263	5949	39.86	9	9	450630	0.0191132	1	1	1		11842	tr|B2RYU0|B2RYU0_RAT	0.653372	266	5819	32.86	9	9	242580	0.012488	1	1	1		11842	NADH dehydrogenase (Ubiquinone) 1 beta subcomplex 2 (Predicted) isoform CRA_b OS=Rattus norvegicus OX=10116 GN=Ndufb2 PE=1 SV=1
273	192	23.49	14	14	289150	0.0122641	1	1	1		12700	tr|B5DEL8|B5DEL8_RAT	-							0						NADH dehydrogenase (Ubiquinone) Fe-S protein 5 OS=Rattus norvegicus OX=10116 GN=Ndufs5 PE=1 SV=1
						0						tr|Q06QG6|Q06QG6_RAT	+	42	182	101.34	8	8	1353800	0.0696937	7	7	9		68588	NADH-ubiquinone oxidoreductase chain 5 OS=Rattus norvegicus OX=10116 GN=ND5 PE=3 SV=1
						0						tr|B2RYW3|B2RYW3_RAT	+	114	235	46.63	13	13	175610	0.00904042	2	2	2	Oxidation (M)	21892	NADH dehydrogenase (Ubiquinone) 1 beta subcomplex 9 OS=Rattus norvegicus OX=10116 GN=Ndufb9 PE=1 SV=1
						0						tr|D4A4P3|D4A4P3_RAT	+	134	414	30.54	15	15	586050	0.0301699	2	2	2		11267	NADH:ubiquinone oxidoreductase subunit B3 OS=Rattus norvegicus OX=10116 GN=Ndufb3 PE=1 SV=1
24	164	184.14	23	23	10259000	0.43513	13	13	25	Oxidation (M)	17514	tr|D3ZF13|D3ZF13_RAT	0.939805	22	48	163.06	29	29	7943600	0.408937	13	13	21	Oxidation (M)	17514	Acyl carrier protein OS=Rattus norvegicus OX=10116 GN=Ndufab1 PE=1 SV=1
Complex III
26	12	173.08	15	15	6311700	0.267707	12	12	22		52849	Q68FY0|QCR1_RAT	0.750297	25	16	154.18	16	16	3901700	0.20086	15	15	18	Carbamidomethylation	52849	Cytochrome b-c1 complex subunit 1 mitochondrial OS=Rattus norvegicus OX=10116 GN=Uqcrc1 PE=1 SV=1
30	13	168.74	15	15	8206100	0.348057	13	13	20		48396	P32551|QCR2_RAT	0.749356	33	21	108.59	11	11	5066400	0.260819	10	10	14		48396	Cytochrome b-c1 complex subunit 2 mitochondrial OS=Rattus norvegicus OX=10116 GN=Uqcrc2 PE=1 SV=2
68	65	107.3	14	14	1254700	0.0532174	5	5	6		43012	P00159|CYB_RAT	0.822551	73	97	81.26	9	9	850310	0.043774	4	4	4		43012	Cytochrome b OS=Rattus norvegicus OX=10116 GN=Mt-Cyb PE=3 SV=3
72	80	104.55	11	11	1846300	0.0783098	3	3	5		29446	P20788|UCRI_RAT	0.506979	67	42	97.39	8	8	771200	0.0397014	3	3	4		29446	Cytochrome b-c1 complex subunit Rieske mitochondrial OS=Rattus norvegicus OX=10116 GN=Uqcrfs1 PE=1 SV=2
						0						Q5M9I5|QCR6_RAT	+	279	338	24.93	17	17	126470	0.00651069	1	1	1		10424	Cytochrome b-c1 complex subunit 6 mitochondrial OS=Rattus norvegicus OX=10116 GN=Uqcrh PE=3 SV=1
Complex IV
41	82	135.94	26	26	3391900	0.143866	9	9	13	Oxidation (M)	25928	P00406|COX2_RAT	0.756319	52	112	91.71	29	29	2113600	0.108808	7	7	7	Oxidation (M)		Cytochrome c oxidase subunit 2 OS=Rattus norvegicus OX=10116 GN=Mtco2 PE=1 SV=3
52	179	136.75	33	33	5215100	0.221196	6	6	10		16130	P11240|COX5A_RAT	0.578651	54	44	126.62	31	31	2486300	0.127995	5	5	7		16130	Cytochrome c oxidase subunit 5A mitochondrial OS=Rattus norvegicus OX=10116 GN=Cox5a PE=1 SV=1
53	158	126.29	11	11	1725900	0.0732031	6	6	9	Oxidation (M)		P05503|COX1_RAT	0.245041	101	233	49.91	4	4	348440	0.0179377	2	2	2		56845	Cytochrome c oxidase subunit 1
59	22	159.23	9	9	4889200	0.207373	5	5	8		35435	tr|D3ZFQ8|D3ZFQ8_RAT	1.04294	48	38	132.42	9	9	4201200	0.216278	4	4	8		35435	Cytochrome c-1 OS=Rattus norvegicus OX=10116 GN=Cyc1 PE=1 SV=3
73	220	43.58	22	22	3188400	0.135234	4	4	5		13915	P12075|COX5B_RAT	0.424375	68	322	44.85	28	28	1114800	0.05739	4	4	4		13915	Cytochrome c oxidase subunit 5B mitochondrial OS=Rattus norvegicus OX=10116 GN=Cox5b PE=1 SV=2
74	182	74.44	17	17	1155700	0.0490184	4	4	5		19515	P10888|COX41_RAT	0.408095	92	247	50.93	12	12	388580	0.0200041	2	2	3		19515	Cytochrome c oxidase subunit 4 isoform 1 mitochondrial OS=Rattus norvegicus OX=10116 GN=Cox4i1 PE=1 SV=1
143	347	29.79	14	14	243120	0.0103118	1	1	2		7672	P80433|COX8A_RAT	1.03581	270	361	31.69	14	14	207480	0.0106811	1	1	1		7672	Cytochrome c oxidase subunit 8A mitochondrial OS=Rattus norvegicus OX=10116 GN=Cox8a PE=1 SV=3
151	283	82.69	29	29	689260	0.0292346	2	2	2		8995	P80431|COX7B_RAT	-							0						Cytochrome c oxidase subunit 7B mitochondrial OS=Rattus norvegicus OX=10116 GN=Cox7b PE=1 SV=3
Complex V
1	20	358.35	57	57	613900000	26.0382	160	156	494	Carbamidomethylation		P15999|ATPA_RAT	0.900785	2	10	326.78	60	60	455610000	23.4548	159	157	432	Carbamidomethylation		ATP synthase subunit alpha, mitochondrial
2	17	398.18	64	64	657620000	27.8926	183	180	407	Oxidation (M)		P10719|ATPB_RAT	0.777888	3	8	359.3	65	65	421470000	21.6973	177	174	322	Oxidation (M)	56354	ATP synthase subunit beta, mitochondrial
8	268	225.77	30	30	81333000	3.44969	32	32	87		28869	P19511|AT5F1_RAT	0.71507	10	246	199.97	30	30	47917000	2.46677	27	27	54		28869	ATP synthase F(0) complex subunit B1 mitochondrial OS=Rattus norvegicus OX=10116 GN=Atp5pb PE=1 SV=1
9	301	259.98	40	40	74174000	3.14605	35	35	84	Oxidation (M)	30191	P35435|ATPG_RAT	0.786196	6	64	245.02	37	37	48046000	2.47341	36	36	82	Oxidation (M)	30191	ATP synthase subunit gamma mitochondrial OS=Rattus norvegicus OX=10116 GN=Atp5f1c PE=1 SV=2
10	280	309.21	71	71	68444000	2.90301	49	49	82	Oxidation (M)	18763	P31399|ATP5H_RAT	0.605682	8	119	264.38	61	61	34155000	1.7583	36	35	59	Carbamidomethylation		ATP synthase subunit d mitochondrial OS=Rattus norvegicus OX=10116 GN=Atp5pd PE=1 SV=3
14	5938	188.95	56	56	25753000	1.0923	30	30	51	Carbamidomethylation		Q06647|ATPO_RAT	0.690926	14	5802	162.52	45	45	14660000	0.754698	21	20	36	Carbamidomethylation		ATP synthase subunit O, mitochondrial
18	5937	190.11	39	39	27382000	1.16139	13	13	32	Oxidation (M)	11433	Q6PDU7|ATP5L_RAT	0.551019	19	1646	137.93	39	39	12431000	0.639949	13	13	25	Oxidation (M)	11433	ATP synthase subunit g mitochondrial OS=Rattus norvegicus OX=10116 GN=Atp5mg PE=1 SV=2
21	387	194.19	36	36	21029000	0.891933	16	16	30	Oxidation (M)	17563	tr|G3V7Y3|G3V7Y3_RAT	0.904259	21	350	167.78	30	30	15667000	0.806538	14	14	22	Oxidation (M)	17563	ATP synthase subunit delta mitochondrial OS=Rattus norvegicus OX=10116 GN=Atp5f1d PE=1 SV=1
22	5942	122.12	32	32	9381500	0.397911	13	13	29	Oxidation (M)		P05504|ATP6_RAT	0.0921117	43	690	64.28	18	18	711970	0.0366523	5	5	9	Oxidation (M)		ATP synthase subunit a
43	416	156.33	48	48	14820000	0.628582	7	7	13	Oxidation (M)	7642	tr|Q5UAJ5|Q5UAJ5_RAT	0.592939	46	1095	89.84	30	30	7239900	0.372711	5	4	9	Oxidation (M)	7642	ATP synthase protein 8 OS=Rattus norvegicus OX=10116 GN=ATP8 PE=3 SV=1
61	11914	79.6	27	27	3040200	0.128948	3	3	8		8255	P29419|ATP5I_RAT	1.33606	47	11740	85.39	34	34	3346600	0.172283	4	4	9		8255	ATP synthase subunit e mitochondrial OS=Rattus norvegicus OX=10116 GN=Atp5me PE=1 SV=3
106	11911	63.45	19	19	844150	0.0358041	2	2	3		12494	P21571|ATP5J_RAT	0.780451	91	5817	54.59	19	19	542800	0.0279434	2	2	3		12494	ATP synthase-coupling factor 6 mitochondrial OS=Rattus norvegicus OX=10116 GN=Atp5pf PE=1 SV=1
109	11922	44.46	21	21	1835600	0.0778559	1	1	3		6408	Q9JJW3|ATPMD_RAT	0.543009	95	11746	36.62	21	21	821220	0.0422765	2	2	3		6408	ATP synthase membrane subunit DAPIT mitochondrial OS=Rattus norvegicus OX=10116 GN=Atp5md PE=1 SV=1
111	11926	29.98	10	10	1286700	0.0545747	1	1	3		10452	D3ZAF6|ATPK_RAT	0.338974	131	11756	25.19	14	14	359350	0.0184994	2	1	2		10452	ATP synthase subunit f mitochondrial OS=Rattus norvegicus OX=10116 GN=Atp5mf PE=1 SV=1
Others
3	1	325.94	51	51	81132000	3.44117	90	90	162	Carbamidomethylation		Q02253|MMSA_RAT	0.0279394	30	50	140.27	17	17	1867600	0.0961442	15	15	16	Carbamidomethylation		Methylmalonate-semialdehyde dehydrogenase [acylating], mitochondrial
4	8	320.5	34	34	73977000	3.13769	96	96	149	Oxidation (M)	164579	P07756|CPSM_RAT	0.802187	4	4	257.16	30	30	48893000	2.51702	79	79	115	Oxidation (M)	164579	Carbamoyl-phosphate synthase [ammonia] mitochondrial OS=Rattus norvegicus OX=10116 GN=Cps1 PE=1 SV=1
5	11	283.84	62	62	104200000	4.41958	68	66	131		29820	P67779|PHB_RAT	0.609141	5	15	248.83	57	57	52295000	2.69215	55	55	83		29820	Prohibitin OS=Rattus norvegicus OX=10116 GN=Phb PE=1 SV=1
6	19	272	61	61	79864000	3.38739	67	64	129	Oxidation (M)	33312	Q5XIH7|PHB2_RAT	0.511824	7	12	225.53	48	48	33678000	1.73375	46	45	71	Oxidation (M)	33312	Prohibitin-2 OS=Rattus norvegicus OX=10116 GN=Phb2 PE=1 SV=1
7	35	282.2	29	29	34267000	1.45342	66	65	110	Oxidation (M)	129777	P52873|PYC_RAT	0.59612	9	30	222.84	24	24	16830000	0.86641	41	41	55	Oxidation (M)	129777	Pyruvate carboxylase mitochondrial OS=Rattus norvegicus OX=10116 GN=Pc PE=1 SV=2
12	15	248.51	36	36	30717000	1.30284	36	35	63	Oxidation (M)	47314	P00507|AATM_RAT	0.582826	15	26	196.49	27	27	14750000	0.759331	23	23	33	Oxidation (M)	47314	Aspartate aminotransferase mitochondrial OS=Rattus norvegicus OX=10116 GN=Got2 PE=1 SV=2
13	14	263.23	37	37	21074000	0.893842	44	44	61	Oxidation (M)	61416	P10860|DHE3_RAT	28.3277	1	1	384.07	68	68	491850000	25.3205	228	225	442	Carbamidomethylation		Glutamate dehydrogenase 1 mitochondrial OS=Rattus norvegicus OX=10116 GN=Glud1 PE=1 SV=2
19	289	231.44	25	25	10034000	0.425586	21	21	31		60420	tr|D3ZFJ6|D3ZFJ6_RAT	0.545118	26	171	177.72	22	22	4506500	0.231995	15	15	17	Carbamidomethylation	60420	Lactamase beta OS=Rattus norvegicus OX=10116 GN=Lactb PE=1 SV=1
23	33	192.46	15	15	7333000	0.311025	21	21	26	Formylation	82665	Q64428|ECHA_RAT	1.06578	23	24	144.98	12	12	6439100	0.331485	15	15	20	Formylation	82665	Trifunctional enzyme subunit alpha mitochondrial OS=Rattus norvegicus OX=10116 GN=Hadha PE=1 SV=2
25	76	201.57	25	25	7912400	0.3356	20	20	24		56886	tr|Q68G44|Q68G44_RAT	0.93221	16	22	193.93	29	29	6077100	0.31285	25	25	31		56886	3-hydroxy-3-methylglutaryl coenzyme A synthase OS=Rattus norvegicus OX=10116 GN=Hmgcs2 PE=1 SV=1
31	169	171.47	18	18	4907600	0.208153	15	15	19		51414	Q60587|ECHB_RAT	0.868607	29	27	145.31	21	21	3512100	0.180803	15	15	16		51414	Trifunctional enzyme subunit beta mitochondrial OS=Rattus norvegicus OX=10116 GN=Hadhb PE=1 SV=1
34	100	144.23	21	21	6214400	0.26358	13	13	18		44695	P17764|THIL_RAT	1.1021	24	35	139.39	22	22	5642800	0.290492	13	13	19	Formylation	44695	Acetyl-CoA acetyltransferase mitochondrial OS=Rattus norvegicus OX=10116 GN=Acat1 PE=1 SV=1
35	228	175.41	13	13	12428000	0.527127	14	14	17		75316	P16970|ABCD3_RAT	0.0829714	90	307	45.09	5	5	849580	0.0437364	3	3	3		75316	ATP-binding cassette sub-family D member 3 OS=Rattus norvegicus OX=10116 GN=Abcd3 PE=1 SV=3
37	29	196.8	27	27	7993800	0.339053	9	9	16		24674	P07895|SODM_RAT	0.230015	31	32	164.03	28	28	1514900	0.0779872	10	10	15		24674	Superoxide dismutase [Mn] mitochondrial OS=Rattus norvegicus OX=10116 GN=Sod2 PE=1 SV=2
38	266	152.68	13	13	3087700	0.130963	11	11	15		59757	P04762|CATA_RAT	0.528625	36	45	127.85	9	9	1344800	0.0692304	9	9	11		59757	Catalase OS=Rattus norvegicus OX=10116 GN=Cat PE=1 SV=3
46	176	134.04	14	14	3371900	0.143017	8	8	12		36148	P13086|SUCA_RAT	0.954282	27	46	129.53	13	13	2651100	0.136479	9	9	17		36148	Succinate--CoA ligase [ADP/GDP-forming] subunit alpha mitochondrial OS=Rattus norvegicus OX=10116 GN=Suclg1 PE=2 SV=2
54	245	96.91	8	8	1312200	0.0556562	7	7	9		78179	P18163|ACSL1_RAT	0.748519	56	54	67.92	5	5	809240	0.0416597	5	3	7		78179	Long-chain-fatty-acid--CoA ligase 1 OS=Rattus norvegicus OX=10116 GN=Acsl1 PE=1 SV=1
56	244	104.16	13	13	2321300	0.0984566	5	5	8		34973	P07824|ARGI1_RAT	0.38546	65	190	67.48	12	12	737200	0.0379511	3	3	4		34973	Arginase-1 OS=Rattus norvegicus OX=10116 GN=Arg1 PE=1 SV=2
58	231	80.79	14	14	2250800	0.0954664	6	6	8		28340	tr|Q5M949|Q5M949_RAT	0.873582	55	210	90.29	13	13	1620000	0.0833977	5	5	7		28340	Nipsnap homolog 3A (C. elegans) OS=Rattus norvegicus OX=10116 GN=Nipsnap3b PE=1 SV=1
60	261	154.41	10	10	1658800	0.0703571	5	5	8		33407	P24329|THTR_RAT	1.27835	45	136	168.08	13	13	1747100	0.0899409	8	8	9		33407	Thiosulfate sulfurtransferase OS=Rattus norvegicus OX=10116 GN=Tst PE=1 SV=3
62	1940	146.87	7	7	2022400	0.085779	6	6	7		102908	A2VCW9|AASS_RAT	1.65101	51	742	130.76	9	9	2751000	0.141622	7	7	7	Formylation	102908	Alpha-aminoadipic semialdehyde synthase mitochondrial OS=Rattus norvegicus OX=10116 GN=Aass PE=2 SV=1
63	5947	96.84	3	3	1187700	0.0503756	4	4	7		105792	Q924S5|LONM_RAT	0.350009	71	297	68.69	3	3	342500	0.0176319	3	3	4		105792	Lon protease homolog mitochondrial OS=Rattus norvegicus OX=10116 GN=Lonp1 PE=2 SV=1
65	198	113.46	10	10	911980	0.0386811	5	5	7		49522	P85834|EFTU_RAT	15.9174	13	3	214.69	27	27	11960000	0.615702	30	30	40	Oxidation (M)	49522	Elongation factor Tu mitochondrial OS=Rattus norvegicus OX=10116 GN=Tufm PE=1 SV=1
66	291	114.39	10	10	397670	0.016867	5	5	7		20541	tr|Q5XFW4|Q5XFW4_RAT	0.43444	190	289	29.56	7	7	142340	0.00732768	1	1	1		20541	Mitochondrial ribosomal protein L13 OS=Rattus norvegicus OX=10116 GN=Mrpl13 PE=1 SV=1
67	219	112.27	18	18	1206500	0.051173	5	5	6		22305	P04041|GPX1_RAT	0.179531	173	53	32.37	5	5	178460	0.00918714	1	1	1		22305	Glutathione peroxidase 1 OS=Rattus norvegicus OX=10116 GN=Gpx1 PE=1 SV=4
71	1219	106.77	6	6	736680	0.0312459	5	5	5		77891	tr|D3ZGM1|D3ZGM1_RAT	0.276909	267	312	32.68	1	1	168070	0.00865226	1	1	1		77891	Pentatricopeptide repeat domain 3 OS=Rattus norvegicus OX=10116 GN=Ptcd3 PE=1 SV=1
75	194	73.85	17	17	1520200	0.0644784	4	4	5		22179	Q9R063|PRDX5_RAT	0.880324	84	216	38.9	9	9	1102600	0.0567619	2	2	3		22179	Peroxiredoxin-5 mitochondrial OS=Rattus norvegicus OX=10116 GN=Prdx5 PE=1 SV=1
77	346	79.17	19	19	546530	0.0231808	3	3	5		17050	Q63750|RM23_RAT	-							0						39S ribosomal protein L23 mitochondrial OS=Rattus norvegicus OX=10116 GN=Mrpl23 PE=2 SV=1
80	814	116.8	3	3	820970	0.034821	4	4	4		70749	P45953|ACADV_RAT	0.526569	98	201	74.08	3	3	356170	0.0183357	2	2	2		70749	Very long-chain specific acyl-CoA dehydrogenase mitochondrial OS=Rattus norvegicus OX=10116 GN=Acadvl PE=1 SV=1
82	3	67.54	4	4	555890	0.0235778	2	2	4		53274	tr|B2GV15|B2GV15_RAT	-							0						Dihydrolipoamide acetyltransferase component of pyruvate dehydrogenase complex OS=Rattus norvegicus OX=10116 GN=Dbt PE=1 SV=1
85	753	52.39	8	8	454510	0.0192778	3	3	4		17472	P08011|MGST1_RAT	1.71669	81	250	52.63	15	15	642850	0.033094	3	3	3		17472	Microsomal glutathione S-transferase 1 OS=Rattus norvegicus OX=10116 GN=Mgst1 PE=1 SV=3
87	233	60.12	10	10	758880	0.0321875	4	3	4		38202	P29147|BDH_RAT	0.535409	72	61	83.4	8	8	334760	0.0172335	4	3	4		38202	D-beta-hydroxybutyrate dehydrogenase mitochondrial OS=Rattus norvegicus OX=10116 GN=Bdh1 PE=1 SV=2
88	232	61.62	6	6	452810	0.0192057	2	2	4		38374	tr|M0R6J0|M0R6J0_RAT	0.388506	271	197	31.13	3	3	144940	0.00746152	1	1	1		38374	Mitochondrial ribosomal protein L39 OS=Rattus norvegicus OX=10116 GN=Mrpl39 PE=1 SV=2
90	816	60.31	5	5	149150	0.00632611	3	2	4		44494	tr|Q5U2T0|Q5U2T0_RAT	-	66	236	34.01	4	4	0	0	2	1	4		44494	Death associated protein 3 OS=Rattus norvegicus OX=10116 GN=Dap3 PE=2 SV=1
91	290	68.98	8	8	1002300	0.042512	3	3	4		37440	tr|Q4G067|Q4G067_RAT	0.425178	125	222	58.68	4	4	351110	0.0180752	2	2	2		37440	Mitochondrial ribosomal protein L44 OS=Rattus norvegicus OX=10116 GN=Mrpl44 PE=1 SV=1
95	380	49.73	9	9	182860	0.0077559	2	2	3		27246	O70351|HCD2_RAT	1.79273	93	188	52.99	7	7	270090	0.0139043	2	2	3		27246	3-hydroxyacyl-CoA dehydrogenase type-2 OS=Rattus norvegicus OX=10116 GN=Hsd17b10 PE=1 SV=3
100	348	83.8	9	9	307470	0.0130412	3	3	3		45834	P09139|SPYA_RAT	-	264	244	33.97	3	3	0	0	1	1	1		45834	Serine--pyruvate aminotransferase mitochondrial OS=Rattus norvegicus OX=10116 GN=Agxt PE=1 SV=1
101	6035	31.59	3	3	383140	0.0162507	2	2	3		51496	Q68FU7|COQ6_RAT	-							0						Ubiquinone biosynthesis monooxygenase COQ6 mitochondrial OS=Rattus norvegicus OX=10116 GN=Coq6 PE=2 SV=1
102	332	100.95	6	6	534430	0.0226675	3	3	3		85433	Q9ER34|ACON_RAT	-							0						Aconitate hydratase mitochondrial OS=Rattus norvegicus OX=10116 GN=Aco2 PE=1 SV=2
103	322	57.96	8	8	1652300	0.0700814	3	3	3		32901	Q09073|ADT2_RAT	-							0						ADP/ATP translocase 2 OS=Rattus norvegicus OX=10116 GN=Slc25a5 PE=1 SV=3
104	295	57.55	9	9	388650	0.0164844	3	3	3		29822	Q8VID1|DHRS4_RAT	-							0						Dehydrogenase/reductase SDR family member 4 OS=Rattus norvegicus OX=10116 GN=Dhrs4 PE=2 SV=2
105	264	72.98	3	3	600160	0.0254555	3	3	3	Formylation	68731	P02770|ALBU_RAT	-							0						Serum albumin OS=Rattus norvegicus OX=10116 GN=Alb PE=1 SV=2
107	277	51.63	3	3	626630	0.0265782	2	2	3		67177	Q3KR86|MIC60_RAT	0.741922	100	110	72.48	4	4	383040	0.0197189	2	2	2		67177	MICOS complex subunit Mic60 (Fragment) OS=Rattus norvegicus OX=10116 GN=Immt PE=1 SV=1
108	1292	68.42	5	5	337350	0.0143085	2	2	3		37791	tr|G3V6I4|G3V6I4_RAT	0.82812	80	207	59.34	7	7	230170	0.0118492	2	2	3		37791	Mitochondrial amidoxime reducing component 1 OS=Rattus norvegicus OX=10116 GN=Marc1 PE=1 SV=1
119	1285	31.46	6	6	7010000	0.297325	2	2	2		20718	Q80ZG6|BBC3_RAT	0.087455	119	1248	27.12	10	10	505100	0.0260026	2	2	2		20718	Bcl-2-binding component 3 OS=Rattus norvegicus OX=10116 GN=Bbc3 PE=1 SV=1
125	667	106.95	5	5	338140	0.014342	2	2	2		47388	tr|B2RZ24|B2RZ24_RAT	-	261	277	67.94	4	4	0	0	1	1	1		47388	Succinate-CoA ligase subunit beta (Fragment) OS=Rattus norvegicus OX=10116 GN=Sucla2 PE=2 SV=1
128	293	40.85	7	7	641240	0.0271978	2	2	2	Oxidation (M)	32433	Q9WVK3|PECR_RAT	0.337581	123	283	36.01	7	7	178350	0.00918147	2	2	2	Oxidation (M)	32433	Peroxisomal trans-2-enoyl-CoA reductase OS=Rattus norvegicus OX=10116 GN=Pecr PE=2 SV=1
129	1045	43.98	4	4	5658000	0.239981	2	2	2		51002	Q2V057|HYPDH_RAT	0.280052	117	306	50.95	4	4	1305500	0.0672072	2	2	2		51002	Hydroxyproline dehydrogenase OS=Rattus norvegicus OX=10116 GN=Prodh2 PE=2 SV=1
136	1546	31.65	12	12	61742	0.00261875	2	2	2	Oxidation (M)	23350	Q9EPJ3|RT26_RAT	-							0						28S ribosomal protein S26 mitochondrial OS=Rattus norvegicus OX=10116 GN=Mrps26 PE=1 SV=1
140	406	26.82	1	1	371920	0.0157748	1	1	2		67300	tr|D3ZD23|D3ZD23_RAT	3.23854	129	656	31.1	1	1	992370	0.0510873	2	2	2		67300	ATP-binding cassette subfamily E member 1 OS=Rattus norvegicus OX=10116 GN=Abce1 PE=1 SV=1
158	397	47.52	11	11	15168	0.000643342	2	2	2	Oxidation (M)	15193	Q5BJX1|RM41_RAT	-							0						39S ribosomal protein L41 mitochondrial OS=Rattus norvegicus OX=10116 GN=Mrpl41 PE=1 SV=1
228	162	34.65	4	4	119440	0.00506598	1	1	1		33215	tr|Q5EBA4|Q5EBA4_RAT	5.07324	87	143	66.89	11	11	499240	0.0257009	3	3	3	Oxidation (M)	33215	Nipsnap1 protein (Fragment) OS=Rattus norvegicus OX=10116 GN=Nipsnap1 PE=2 SV=1
229	309	40.87	2	2	449970	0.0190852	1	1	1		60956	P63039|CH60_RAT	0.534486	112	218	49.63	4	4	198150	0.0102008	2	2	2	Oxidation (M)	60956	60 kDa heat shock protein mitochondrial OS=Rattus norvegicus OX=10116 GN=Hspd1 PE=1 SV=1
233	5951	31.74	7	7	180330	0.0076486	1	1	1		20651	tr|B2RZ57|B2RZ57_RAT	-							0						Mitochondrial ribosomal protein L18 OS=Rattus norvegicus OX=10116 GN=Mrpl18 PE=1 SV=1
259	11921	50.85	9	9	259430	0.0110036	1	1	1		18377	tr|D4ACA5|D4ACA5_RAT	-							0						Mitochondrial import inner membrane translocase subunit TIM17 OS=Rattus norvegicus OX=10116 GN=LOC100911130 PE=1 SV=1
270	11928	26.49	7	7	237880	0.0100895	1	1	1		17526	tr|B2GV62|B2GV62_RAT	-							0						Mitochondrial ribosomal protein L20 OS=Rattus norvegicus OX=10116 GN=Mrpl20 PE=1 SV=1
272	11942	23.63	9	9	63576	0.00269654	1	1	1		10726	tr|A0A0U1RRX6|A0A0U1RRX6_RAT	2.18747	281	11749	23.67	9	9	114580	0.00589859	1	1	1		10726	5-demethoxyubiquinone hydroxylase mitochondrial (Fragment) OS=Rattus norvegicus OX=10116 GN=Coq7 PE=1 SV=1
						0						tr|A0A0G2JSH5|A0A0G2JSH5_RAT	+	61	192	71.21	5	5	2562900	0.131938	4	4	5	Formylation	68759	Serum albumin OS=Rattus norvegicus OX=10116 GN=Alb PE=1 SV=1
						0						Q6AXV4|SAM50_RAT	+	79	139	72.26	6	6	129970	0.00669087	3	3	3		51960	Sorting and assembly machinery component 50 homolog OS=Rattus norvegicus OX=10116 GN=Samm50 PE=1 SV=1
						0						P11884|ALDH2_RAT	+	89	141	71.9	6	6	254000	0.0130759	3	3	3		56488	Aldehyde dehydrogenase mitochondrial OS=Rattus norvegicus OX=10116 GN=Aldh2 PE=1 SV=1
						0						Q62925|M3K1_RAT	+	94	1525	32.14	2	2	244650	0.0125946	3	3	3	Oxidation (M)		Mitogen-activated protein kinase kinase kinase 1
						0						P49432|ODPB_RAT	+	133	195	50.13	3	3	58467	0.00300989	2	2	2		38982	Pyruvate dehydrogenase E1 component subunit beta mitochondrial OS=Rattus norvegicus OX=10116 GN=Pdhb PE=1 SV=2
					2357687596							tr|D3ZTW8|D3ZTW8_RAT	+	189	264	37.32	8	8	128420	0.00661107	1	1	1		15823	Mitochondrial ribosomal protein L27 OS=Rattus norvegicus OX=10116 GN=Mrpl27 PE=1 SV=2
						100													1942498771	100
					2.35769e+07
																			1.9425e+07

## Sheet: RLM SM-BM Dimer Big difference
Area (IBAQ)	riBAQ	Accession	rIBAQ PTP/Control	Area (IBAQ)	riBAQ	Description
CONTROL	%			PTP	%
Complex I
3192400	0.135404	P05508|NU4M_RAT	0.259484	682500	0.0351352	NADH-ubiquinone oxidoreductase chain 4
6381700	0.270676	P11661|NU5M_RAT	0.25748	1353800	0.0696937	NADH-ubiquinone oxidoreductase chain 5 OS=Rattus norvegicus OX=10116 GN=Mtnd5 PE=3 SV=3
3866200	0.163983	tr|A0A0G2JVL6|A0A0G2JVL6_RAT	0.485533	1546600	0.0796191	NADH dehydrogenase [ubiquinone] 1 alpha subcomplex subunit 8 OS=Rattus norvegicus OX=10116 GN=Ndufa8 PE=1 SV=1
1390100	0.0589603	P11662|NU2M_RAT	-		0	NADH-ubiquinone oxidoreductase chain 2 OS=Rattus norvegicus OX=10116 GN=Mtnd2 PE=3 SV=3
1724700	0.0731522	tr|D4A565|D4A565_RAT	2.34352	3330100	0.171434	NADH dehydrogenase (Ubiquinone) 1 beta subcomplex 5 (Predicted) isoform CRA_b OS=Rattus norvegicus OX=10116 GN=Ndufb5 PE=1 SV=1
2143500	0.0909154	tr|F1LPG5|F1LPG5_RAT	0.495048	874270	0.0450075	NADH:ubiquinone oxidoreductase subunit B4 OS=Rattus norvegicus OX=10116 GN=Ndufb4 PE=1 SV=1
702550	0.0297983	tr|D3ZZ21|D3ZZ21_RAT	3.00364	1738600	0.0895033	NADH dehydrogenase (Ubiquinone) 1 beta subcomplex 6 (Predicted) OS=Rattus norvegicus OX=10116 GN=Ndufb6 PE=1 SV=1
789400	0.033482	tr|D4A3V2|D4A3V2_RAT	2.33	1515400	0.0780129	NADH dehydrogenase [ubiquinone] 1 alpha subcomplex subunit 6 OS=Rattus norvegicus OX=10116 GN=Ndufa6 PE=1 SV=1
2143700	0.0909238	Q63362|NDUA5_RAT	0.288026	508710	0.0261884	NADH dehydrogenase [ubiquinone] 1 alpha subcomplex subunit 5 OS=Rattus norvegicus OX=10116 GN=Ndufa5 PE=1 SV=3
1471600	0.0624171	tr|A0A0G2KAA3|A0A0G2KAA3_RAT	-	0	0	NADH:ubiquinone oxidoreductase subunit A3 OS=Rattus norvegicus OX=10116 GN=Ndufa3 PE=1 SV=1
173420	0.00735551	tr|D3ZE15|D3ZE15_RAT	4.51166	644630	0.0331856	NADH:ubiquinone oxidoreductase subunit A13 OS=Rattus norvegicus OX=10116 GN=Ndufa13 PE=1 SV=1
274870	0.0116585	tr|D3ZS58|D3ZS58_RAT	2.83721	642530	0.0330775	NADH dehydrogenase [ubiquinone] 1 alpha subcomplex subunit 2 OS=Rattus norvegicus OX=10116 GN=Ndufa2 PE=1 SV=1
289150	0.0122641	tr|B5DEL8|B5DEL8_RAT	-		0	NADH dehydrogenase (Ubiquinone) Fe-S protein 5 OS=Rattus norvegicus OX=10116 GN=Ndufs5 PE=1 SV=1
	0	tr|B2RYW3|B2RYW3_RAT	+	175610	0.00904042	NADH dehydrogenase (Ubiquinone) 1 beta subcomplex 9 OS=Rattus norvegicus OX=10116 GN=Ndufb9 PE=1 SV=1
	0	tr|D4A4P3|D4A4P3_RAT	+	586050	0.0301699	NADH:ubiquinone oxidoreductase subunit B3 OS=Rattus norvegicus OX=10116 GN=Ndufb3 PE=1 SV=1
Complex III
	0	Q5M9I5|QCR6_RAT	+	126470	0.00651069	Cytochrome b-c1 complex subunit 6 mitochondrial OS=Rattus norvegicus OX=10116 GN=Uqcrh PE=3 SV=1
Complex IV
1725900	0.0732031	P05503|COX1_RAT	0.245041	348440	0.0179377	Cytochrome c oxidase subunit 1
3188400	0.135234	P12075|COX5B_RAT	0.424375	1114800	0.05739	Cytochrome c oxidase subunit 5B mitochondrial OS=Rattus norvegicus OX=10116 GN=Cox5b PE=1 SV=2
1155700	0.0490184	P10888|COX41_RAT	0.408095	388580	0.0200041	Cytochrome c oxidase subunit 4 isoform 1 mitochondrial OS=Rattus norvegicus OX=10116 GN=Cox4i1 PE=1 SV=1
689260	0.0292346	P80431|COX7B_RAT	-		0	Cytochrome c oxidase subunit 7B mitochondrial OS=Rattus norvegicus OX=10116 GN=Cox7b PE=1 SV=3
Complex V
9381500	0.397911	P05504|ATP6_RAT	0.0921117	711970	0.0366523	ATP synthase subunit a
1286700	0.0545747	D3ZAF6|ATPK_RAT	0.338974	359350	0.0184994	ATP synthase subunit f mitochondrial OS=Rattus norvegicus OX=10116 GN=Atp5mf PE=1 SV=1
Other
81132000	3.44117	Q02253|MMSA_RAT	0.0279394	1867600	0.0961442	Methylmalonate-semialdehyde dehydrogenase [acylating], mitochondrial
21074000	0.893842	P10860|DHE3_RAT	28.3277	491850000	25.3205	Glutamate dehydrogenase 1 mitochondrial OS=Rattus norvegicus OX=10116 GN=Glud1 PE=1 SV=2
12428000	0.527127	P16970|ABCD3_RAT	0.0829714	849580	0.0437364	ATP-binding cassette sub-family D member 3 OS=Rattus norvegicus OX=10116 GN=Abcd3 PE=1 SV=3
7993800	0.339053	P07895|SODM_RAT	0.230015	1514900	0.0779872	Superoxide dismutase [Mn] mitochondrial OS=Rattus norvegicus OX=10116 GN=Sod2 PE=1 SV=2
2321300	0.0984566	P07824|ARGI1_RAT	0.38546	737200	0.0379511	Arginase-1 OS=Rattus norvegicus OX=10116 GN=Arg1 PE=1 SV=2
1187700	0.0503756	Q924S5|LONM_RAT	0.350009	342500	0.0176319	Lon protease homolog mitochondrial OS=Rattus norvegicus OX=10116 GN=Lonp1 PE=2 SV=1
911980	0.0386811	P85834|EFTU_RAT	15.9174	11960000	0.615702	Elongation factor Tu mitochondrial OS=Rattus norvegicus OX=10116 GN=Tufm PE=1 SV=1
397670	0.016867	tr|Q5XFW4|Q5XFW4_RAT	0.43444	142340	0.00732768	Mitochondrial ribosomal protein L13 OS=Rattus norvegicus OX=10116 GN=Mrpl13 PE=1 SV=1
1206500	0.051173	P04041|GPX1_RAT	0.179531	178460	0.00918714	Glutathione peroxidase 1 OS=Rattus norvegicus OX=10116 GN=Gpx1 PE=1 SV=4
736680	0.0312459	tr|D3ZGM1|D3ZGM1_RAT	0.276909	168070	0.00865226	Pentatricopeptide repeat domain 3 OS=Rattus norvegicus OX=10116 GN=Ptcd3 PE=1 SV=1
546530	0.0231808	Q63750|RM23_RAT	-		0	39S ribosomal protein L23 mitochondrial OS=Rattus norvegicus OX=10116 GN=Mrpl23 PE=2 SV=1
555890	0.0235778	tr|B2GV15|B2GV15_RAT	-		0	Dihydrolipoamide acetyltransferase component of pyruvate dehydrogenase complex OS=Rattus norvegicus OX=10116 GN=Dbt PE=1 SV=1
452810	0.0192057	tr|M0R6J0|M0R6J0_RAT	0.388506	144940	0.00746152	Mitochondrial ribosomal protein L39 OS=Rattus norvegicus OX=10116 GN=Mrpl39 PE=1 SV=2
149150	0.00632611	tr|Q5U2T0|Q5U2T0_RAT	-	0	0	Death associated protein 3 OS=Rattus norvegicus OX=10116 GN=Dap3 PE=2 SV=1
1002300	0.042512	tr|Q4G067|Q4G067_RAT	0.425178	351110	0.0180752	Mitochondrial ribosomal protein L44 OS=Rattus norvegicus OX=10116 GN=Mrpl44 PE=1 SV=1
307470	0.0130412	P09139|SPYA_RAT	0	0	0	Serine--pyruvate aminotransferase mitochondrial OS=Rattus norvegicus OX=10116 GN=Agxt PE=1 SV=1
383140	0.0162507	Q68FU7|COQ6_RAT	0		0	Ubiquinone biosynthesis monooxygenase COQ6 mitochondrial OS=Rattus norvegicus OX=10116 GN=Coq6 PE=2 SV=1
534430	0.0226675	Q9ER34|ACON_RAT	0		0	Aconitate hydratase mitochondrial OS=Rattus norvegicus OX=10116 GN=Aco2 PE=1 SV=2
1652300	0.0700814	Q09073|ADT2_RAT	0		0	ADP/ATP translocase 2 OS=Rattus norvegicus OX=10116 GN=Slc25a5 PE=1 SV=3
388650	0.0164844	Q8VID1|DHRS4_RAT	0		0	Dehydrogenase/reductase SDR family member 4 OS=Rattus norvegicus OX=10116 GN=Dhrs4 PE=2 SV=2
600160	0.0254555	P02770|ALBU_RAT	5.18311	2562900	0.131938	Serum albumin OS=Rattus norvegicus OX=10116 GN=Alb PE=1 SV=2
7010000	0.297325	Q80ZG6|BBC3_RAT	0.087455	505100	0.0260026	Bcl-2-binding component 3 OS=Rattus norvegicus OX=10116 GN=Bbc3 PE=1 SV=1
338140	0.014342	tr|B2RZ24|B2RZ24_RAT	-	0	0	Succinate-CoA ligase subunit beta (Fragment) OS=Rattus norvegicus OX=10116 GN=Sucla2 PE=2 SV=1
641240	0.0271978	Q9WVK3|PECR_RAT	0.337581	178350	0.00918147	Peroxisomal trans-2-enoyl-CoA reductase OS=Rattus norvegicus OX=10116 GN=Pecr PE=2 SV=1
5658000	0.239981	Q2V057|HYPDH_RAT	0.280052	1305500	0.0672072	Hydroxyproline dehydrogenase OS=Rattus norvegicus OX=10116 GN=Prodh2 PE=2 SV=1
61742	0.00261875	Q9EPJ3|RT26_RAT	-		0	28S ribosomal protein S26 mitochondrial OS=Rattus norvegicus OX=10116 GN=Mrps26 PE=1 SV=1
371920	0.0157748	tr|D3ZD23|D3ZD23_RAT	3.23854	992370	0.0510873	ATP-binding cassette subfamily E member 1 OS=Rattus norvegicus OX=10116 GN=Abce1 PE=1 SV=1
15168	0.000643342	Q5BJX1|RM41_RAT	-		0	39S ribosomal protein L41 mitochondrial OS=Rattus norvegicus OX=10116 GN=Mrpl41 PE=1 SV=1
119440	0.00506598	tr|Q5EBA4|Q5EBA4_RAT	5.07324	499240	0.0257009	Nipsnap1 protein (Fragment) OS=Rattus norvegicus OX=10116 GN=Nipsnap1 PE=2 SV=1
180330	0.0076486	tr|B2RZ57|B2RZ57_RAT	-		0	Mitochondrial ribosomal protein L18 OS=Rattus norvegicus OX=10116 GN=Mrpl18 PE=1 SV=1
259430	0.0110036	tr|D4ACA5|D4ACA5_RAT	-		0	Mitochondrial import inner membrane translocase subunit TIM17 OS=Rattus norvegicus OX=10116 GN=LOC100911130 PE=1 SV=1
237880	0.0100895	tr|B2GV62|B2GV62_RAT	-		0	Mitochondrial ribosomal protein L20 OS=Rattus norvegicus OX=10116 GN=Mrpl20 PE=1 SV=1
63576	0.00269654	tr|A0A0U1RRX6|A0A0U1RRX6_RAT	2.18747	114580	0.00589859	5-demethoxyubiquinone hydroxylase mitochondrial (Fragment) OS=Rattus norvegicus OX=10116 GN=Coq7 PE=1 SV=1
	0	Q6AXV4|SAM50_RAT	+	129970	0.00669087	Sorting and assembly machinery component 50 homolog OS=Rattus norvegicus OX=10116 GN=Samm50 PE=1 SV=1
	0	P11884|ALDH2_RAT	+	254000	0.0130759	Aldehyde dehydrogenase mitochondrial OS=Rattus norvegicus OX=10116 GN=Aldh2 PE=1 SV=1
	0	Q62925|M3K1_RAT	+	244650	0.0125946	Mitogen-activated protein kinase kinase kinase 1
	0	P49432|ODPB_RAT	+	58467	0.00300989	Pyruvate dehydrogenase E1 component subunit beta mitochondrial OS=Rattus norvegicus OX=10116 GN=Pdhb PE=1 SV=2
		tr|D3ZTW8|D3ZTW8_RAT	+	128420	0.00661107	Mitochondrial ribosomal protein L27 OS=Rattus norvegicus OX=10116 GN=Mrpl27 PE=1 SV=2

## Sheet: RLM SM-BM Monomer All
Protein Group	Protein ID	-10lgP	Coverage (%)	Coverage (%) Sample 1	Area (IBAQ)	riBAQ	#Peptides	#Unique	#Spec Sample 1	PTM	Avg. Mass	Accession	rIBAQ PTP/Control	Protein Group	Protein ID	-10lgP	Coverage (%)	Coverage (%) Sample 1	Area (IBAQ)	riBAQ	#Peptides	#Unique	#Spec Sample 1	PTM	Avg. Mass	Description
					CONTROL	%													PTP	%
Complex I
												tr|A0A0G2JVL6|A0A0G2JVL6_RAT	+	199	34	37.02	7	7	139230	0.00110638	1	1	1		17634	NADH dehydrogenase (Ubiquinone) 1 beta subcomplex 11 (Predicted) OS=Rattus norvegicus OX=10116 GN=Ndufb11 PE=1 SV=1
												tr|D4A7L4|D4A7L4_RAT	+	238	137	44.08	9	9	135780	0.00107897	1	1	1		19965	NADH dehydrogenase [ubiquinone] 1 alpha subcomplex subunit 8 OS=Rattus norvegicus OX=10116 GN=Ndufa8 PE=1 SV=1
												tr|D4A0T0|D4A0T0_RAT	+	256	66	20.77	10	10	434220	0.00345051	1	1	1		20859	NADH:ubiquinone oxidoreductase subunit B10 OS=Rattus norvegicus OX=10116 GN=Ndufb10 PE=1 SV=1
																				0
Complex III																				0
28	13	88.74	5	5	2492000	0.0272134	6	6	9		48396	P32551|QCR2_RAT	1.36363	29	21	104.27	5	5	4669900	0.0371091	6	6	11		48396	Cytochrome b-c1 complex subunit 2 mitochondrial OS=Rattus norvegicus OX=10116 GN=Uqcrc2 PE=1 SV=2
40	12	78.39	6	6	2660100	0.0290491	3	3	5		52849	Q68FY0|QCR1_RAT	0.410219	57	16	82.22	7	7	1499600	0.0119165	4	4	4		52849	Cytochrome b-c1 complex subunit 1 mitochondrial OS=Rattus norvegicus OX=10116 GN=Uqcrc1 PE=1 SV=1
111	65	40.87	3	3	323100	0.00352835	1	1	2		43012	P00159|CYB_RAT	2.15209	49	97	102.62	9	9	955560	0.00759331	4	4	5		43012	Cytochrome b OS=Rattus norvegicus OX=10116 GN=CYTB PE=3 SV=1
151	80	77.02	5	5	369530	0.00403538	1	1	1		43050	P20788|UCRI_RAT	4.21014	48	42	125.14	10	10	2138000	0.0169895	4	4	5	Formylation	29446	Cytochrome b (Fragment) OS=Rattus norvegicus OX=10116 GN=cytb PE=3 SV=1
190	279	35.26	17	17	396150	0.00432608	1	1	1		10424	Q5M9I5|QCR6_RAT	-	241	338	34.58	17	17	0	0	1	1	1		10424	Cytochrome b-c1 complex subunit 6 mitochondrial OS=Rattus norvegicus OX=10116 GN=Uqcrh PE=3 SV=1
						0														0
Complex IV						0														0
44	22	102.41	6	6	1848400	0.0201851	3	2	5		35435	tr|D3ZFQ8|D3ZFQ8_RAT	1.22363	45	38	105.46	6	6	3108200	0.0246992	3	3	5		35435	Cytochrome c-1 OS=Rattus norvegicus OX=10116 GN=Cyc1 PE=1 SV=3
71	82	43.53	7	7	414580	0.00452734	2	2	3	Oxidation (M)	25928	P00406|COX2_RAT	0.871218	109	112	40.45	7	7	496360	0.0039443	2	2	2		25958	Cytochrome c oxidase subunit 2 OS=Rattus norvegicus OX=10116 GN=Mtco2 PE=1 SV=3
						0						P11240|COX5A_RAT	+	107	44	90.83	17	17	529460	0.00420733	2	2	2		16130	Cytochrome c oxidase subunit 5A mitochondrial OS=Rattus norvegicus OX=10116 GN=Cox5a PE=1 SV=1
						0						P35171|CX7A2_RAT	+	236	11743	65.29	14	14	311870	0.00247826	1	1	1		25928	Cytochrome c oxidase subunit 2 OS=Rattus norvegicus OX=10116 GN=Mt-co2 PE=1 SV=1
						0						P10888|COX41_RAT	+	240	247	37.76	8	8	237750	0.00188927	1	1	1		19515	Cytochrome c oxidase subunit 4 isoform 1 mitochondrial OS=Rattus norvegicus OX=10116 GN=Cox4i1 PE=1 SV=1
						0														0
Complex V						0														0
1	20	363.73	59	59	3050800000	33.3157	199	194	1112	Carbamidomethylation		P15999|ATPA_RAT	0.925863	1	10	367.07	63	63	3881700000	30.8457	248	237	1140	Carbamidomethylation		ATP synthase subunit alpha, mitochondrial
2	17	404.32	61	61	3757700000	41.0352	202	197	966	Oxidation (M)		P10719|ATPB_RAT	0.965188	2	8	405.85	71	71	4984200000	39.6067	241	233	875	Oxidation (M)		ATP synthase subunit beta, mitochondrial
4	301	297.02	56	56	433430000	4.73319	67	66	204	Oxidation (M)	30191	P35435|ATPG_RAT	0.889336	6	64	305.24	53	53	529720000	4.20939	80	80	182	Carbamidomethylation		ATP synthase subunit gamma mitochondrial OS=Rattus norvegicus OX=10116 GN=Atp5f1c PE=1 SV=2
5	280	326.71	73	73	306560000	3.34773	58	56	168	Carbamidomethylation		P31399|ATP5H_RAT	1.54211	4	119	349.97	82	82	649670000	5.16257	87	87	194	Carbamidomethylation		ATP synthase subunit d, mitochondrial
6	268	226.48	29	29	376000000	4.10603	36	36	134	Formylation	28869	P19511|AT5F1_RAT	1.18038	5	246	238.91	48	48	609920000	4.8467	59	58	189	Formylation	28869	ATP synthase F(0) complex subunit B1 mitochondrial OS=Rattus norvegicus OX=10116 GN=Atp5pb PE=1 SV=1
8	5938	218.5	48	48	123830000	1.35226	45	43	115	Carbamidomethylation		Q06647|ATPO_RAT	1.55302	7	5802	236.85	54	54	264280000	2.10009	63	61	124	Carbamidomethylation		ATP synthase subunit O, mitochondrial
9	5937	215.17	39	39	109760000	1.19861	25	25	66	Oxidation (M)	11433	Q6PDU7|ATP5L_RAT	1.7153	10	1646	228.57	50	50	258730000	2.05598	38	38	94	Oxidation (M)	11433	ATP synthase subunit g mitochondrial OS=Rattus norvegicus OX=10116 GN=Atp5mg PE=1 SV=2
10	387	203.07	36	36	122500000	1.33774	19	19	55	Oxidation (M)	17563	tr|G3V7Y3|G3V7Y3_RAT	1.13749	11	350	213.55	48	48	191490000	1.52167	26	26	63	Oxidation (M)	17563	ATP synthase subunit delta mitochondrial OS=Rattus norvegicus OX=10116 GN=Atp5f1d PE=1 SV=1
13	5942	121.92	35	35	32507000	0.354986	18	17	45	Oxidation (M)		P05504|ATP6_RAT	0.519673	21	690	108.74	38	38	23215000	0.184477	18	16	27	Oxidation (M)		ATP synthase subunit a
20	416	124.72	42	42	50060000	0.54667	7	6	23	Oxidation (M)	7642	tr|Q5UAJ5|Q5UAJ5_RAT	1.35302	23	1095	135.59	69	69	93080000	0.739656	10	10	22	Oxidation (M)	7642	ATP synthase protein 8 OS=Rattus norvegicus OX=10116 GN=ATP8 PE=3 SV=1
29	11914	62.94	37	37	5323500	0.0581342	4	4	9		8255	P29419|ATP5I_RAT	9.0368	13	11740	155.85	73	73	66111000	0.525348	28	26	56		8255	ATP synthase subunit e mitochondrial OS=Rattus norvegicus OX=10116 GN=Atp5me PE=1 SV=3
30	11926	48.39	17	17	10349000	0.113014	4	4	8		10452	D3ZAF6|ATPK_RAT	1.40972	28	11756	77.21	30	30	20049000	0.159318	8	7	15	Oxidation (M)	10452	ATP synthase subunit f mitochondrial OS=Rattus norvegicus OX=10116 GN=Atp5mf PE=1 SV=1
33	11911	137.22	31	31	4150100	0.0453204	6	6	8		12494	P21571|ATP5J_RAT	7.9783	15	5817	234.2	58	58	45502000	0.361579	29	28	45	Oxidation (M)		ATP synthase-coupling factor 6 mitochondrial OS=Rattus norvegicus OX=10116 GN=Atp5pf PE=1 SV=1
43	11922	55.76	29	29	4965000	0.0542193	3	3	5		6408	Q9JJW3|ATPMD_RAT	1.78306	31	11746	103.21	43	43	12166000	0.0966765	6	6	9		6408	ATP synthase membrane subunit DAPIT mitochondrial OS=Rattus norvegicus OX=10116 GN=Atp5md PE=1 SV=1
						0						D3Z9R8|ATP68_RAT	+	60	34376	51.97	32	32	306390	0.00243471	3	2	4	Oxidation (M)	6914	ATP synthase subunit ATP5MPL mitochondrial OS=Rattus norvegicus OX=10116 GN=Atp5mpl PE=1 SV=1
						0						P29418|ATP5E_RAT	+	119	34379	31.66	25	25	727560	0.00578152	2	2	2		5767	ATP synthase subunit epsilon mitochondrial OS=Rattus norvegicus OX=10116 GN=Atp5f1e PE=1 SV=2
						0														0
Other						0														0
3	35	360.14	39	39	425370000	4.64517	153	150	375	Oxidation (M)	129777	P52873|PYC_RAT	0.705198	3	30	337.26	43	43	412230000	3.27577	164	159	292	Oxidation (M)		Pyruvate carboxylase mitochondrial OS=Rattus norvegicus OX=10116 GN=Pc PE=1 SV=2
7	8	252	25	25	93640000	1.02258	70	68	131	Carbamidomethylation		P07756|CPSM_RAT	0.583058	9	4	256.7	26	26	75030000	0.596222	74	71	98	Carbamidomethylation		Carbamoyl-phosphate synthase [ammonia], mitochondrial
11	1	196.28	19	19	15340000	0.167517	26	25	51	Oxidation (M)	57808	Q02253|MMSA_RAT	0.400948	25	50	156.3	12	12	8452300	0.0671658	13	13	16	Oxidation (M)	57808	Methylmalonate-semialdehyde dehydrogenase [acylating] mitochondrial OS=Rattus norvegicus OX=10116 GN=Aldh6a1 PE=1 SV=1
12	367	168.52	28	28	23897000	0.260962	25	24	48	Oxidation (M)	61869	P0C2X9|AL4A1_RAT	0.483037	17	352	165.56	23	23	15863000	0.126055	26	26	34	Oxidation (M)	61869	Delta-1-pyrroline-5-carboxylate dehydrogenase mitochondrial OS=Rattus norvegicus OX=10116 GN=Aldh4a1 PE=1 SV=1
14	266	195.48	27	27	19116000	0.208753	21	21	36	Oxidation (M)	59757	P04762|CATA_RAT	1.86712	14	45	211.13	27	27	49049000	0.389765	30	30	46		59757	Catalase OS=Rattus norvegicus OX=10116 GN=Cat PE=1 SV=3
15	15	208.27	24	24	35689000	0.389735	22	21	36	Oxidation (M)	47314	P00507|AATM_RAT	1.55826	12	26	237.65	36	36	76425000	0.607307	40	39	58	Oxidation (M)	47314	Aspartate aminotransferase mitochondrial OS=Rattus norvegicus OX=10116 GN=Got2 PE=1 SV=2
16	169	155.82	16	16	12681000	0.13848	17	17	32	Oxidation (M)	51414	Q60587|ECHB_RAT	1.32004	18	27	190.48	27	27	23004000	0.1828	25	25	33		51414	Trifunctional enzyme subunit beta mitochondrial OS=Rattus norvegicus OX=10116 GN=Hadhb PE=1 SV=1
17	33	163.49	12	12	16344000	0.178481	16	15	31	Carbamidomethylation		Q64428|ECHA_RAT	0.984572	16	24	185.48	16	16	22114000	0.175728	20	20	35	Carbamidomethylation	82665	Trifunctional enzyme subunit alpha, mitochondrial
18	289	222.73	17	17	15061000	0.164471	17	17	27		60420	tr|D3ZFJ6|D3ZFJ6_RAT	0.948767	19	171	266.34	25	25	19637000	0.156044	26	26	32		60420	Lactamase beta OS=Rattus norvegicus OX=10116 GN=Lactb PE=1 SV=1
19	309	165.54	16	16	16778000	0.183221	14	14	25	Oxidation (M)	60956	P63039|CH60_RAT	0.814852	20	218	193.69	24	24	18788000	0.149298	25	25	29	Oxidation (M)	60956	60 kDa heat shock protein mitochondrial OS=Rattus norvegicus OX=10116 GN=Hspd1 PE=1 SV=1
21	14	193.93	20	20	8447200	0.092246	17	17	21	Oxidation (M)		P10860|DHE3_RAT	10.1598	8	1	293.87	41	41	117940000	0.937204	66	66	107	Oxidation (M)	61416	Glutamate dehydrogenase 1, mitochondrial
22	245	141.49	9	9	8032700	0.0877195	10	10	20	Formylation	78179	P18163|ACSL1_RAT	1.3833	24	54	158.35	15	15	15270000	0.121342	17	17	21	Formylation	78179	Long-chain-fatty-acid--CoA ligase 1 OS=Rattus norvegicus OX=10116 GN=Acsl1 PE=1 SV=1
23	77	132.53	13	13	5839200	0.0637658	12	12	17		56912	P22791|HMCS2_RAT	1.53705	22	23	176.62	23	23	12334000	0.0980115	21	21	27		56912	Hydroxymethylglutaryl-CoA synthase mitochondrial OS=Rattus norvegicus OX=10116 GN=Hmgcs2 PE=1 SV=1
24	100	127.55	13	13	5613000	0.0612957	8	8	13		44695	P17764|THIL_RAT	1.28725	26	35	142.6	15	15	9929300	0.0789027	10	10	16		44695	Acetyl-CoA acetyltransferase mitochondrial OS=Rattus norvegicus OX=10116 GN=Acat1 PE=1 SV=1
25	317	41.32	1	1	6135900	0.0670059	4	4	10	Formylation	487857	tr|A0A0G2JYD4|A0A0G2JYD4_RAT	0.603486	42	461	34.69	0	0	5088700	0.0404371	2	2	5		487857	Vacuolar protein sorting 13 homolog D OS=Rattus norvegicus OX=10116 GN=Vps13d PE=1 SV=1
27	1292	111.07	12	12	1379200	0.0150613	6	6	9	Formylation	37791	tr|G3V6I4|G3V6I4_RAT	0.827553	35	207	112.27	8	8	1568500	0.012464	4	4	7		37791	Mitochondrial amidoxime reducing component 1 OS=Rattus norvegicus OX=10116 GN=Marc1 PE=1 SV=1
31	888	35.28	6	6	10104000	0.110339	2	2	8	Formylation	41255	O70600|RSAD2_RAT	0.523929	81	356	23.54	5	5	7274900	0.0578096	2	2	3		41255	Radical S-adenosyl methionine domain-containing protein 2 OS=Rattus norvegicus OX=10116 GN=Rsad2 PE=1 SV=1
32	6503	96.59	6	6	1930500	0.0210816	6	4	8		87371	B3DMA2|ACD11_RAT	1.3382	33	11785	113.7	8	8	3550200	0.0282115	7	7	8		87371	Acyl-CoA dehydrogenase family member 11 OS=Rattus norvegicus OX=10116 GN=Acad11 PE=1 SV=1
35	176	94.66	9	9	1558900	0.0170237	5	5	6		36148	P13086|SUCA_RAT	1.92219	27	46	141.11	17	17	4117900	0.0327227	12	12	16	Formylation	36148	Succinate--CoA ligase [ADP/GDP-forming] subunit alpha mitochondrial OS=Rattus norvegicus OX=10116 GN=Suclg1 PE=2 SV=2
37	12306	39.55	3	3	1883600	0.0205695	3	2	6		78400	Q8CGU6|NICA_RAT	-							0						Nicastrin OS=Rattus norvegicus OX=10116 GN=Ncstn PE=1 SV=1
42	261	92.35	6	6	1237900	0.0135182	2	2	5		33407	P24329|THTR_RAT	2.73253	30	136	171.16	18	18	4648500	0.0369391	7	7	9		33407	Thiosulfate sulfurtransferase OS=Rattus norvegicus OX=10116 GN=Tst PE=1 SV=3
49	814	120.51	5	5	607180	0.00663059	4	4	4		70749	P45953|ACADV_RAT	1.42772	36	201	151.85	9	9	1191300	0.00946661	6	6	6		70749	Very long-chain specific acyl-CoA dehydrogenase mitochondrial OS=Rattus norvegicus OX=10116 GN=Acadvl PE=1 SV=1
50	5947	63.57	2	2	406090	0.00443463	2	2	4		105792	Q924S5|LONM_RAT	2.10209	40	297	81.14	3	3	1173100	0.00932198	4	4	6		105792	Lon protease homolog mitochondrial OS=Rattus norvegicus OX=10116 GN=Lonp1 PE=2 SV=1
52	1610	74.15	3	3	509790	0.00556706	2	2	4		74675	A0A0G2K047|ACSS3_RAT	0.217123	67	240	72.24	3	3	152110	0.00120873	2	2	3		74675	Acyl-CoA synthetase short-chain family member 3 mitochondrial OS=Rattus norvegicus OX=10116 GN=Acss3 PE=1 SV=1
57	667	144.95	5	5	345780	0.00377602	4	4	4		47388	tr|B2RZ24|B2RZ24_RAT	1.0642	72	277	128.18	5	5	505690	0.00401844	3	3	3		47388	Succinate-CoA ligase subunit beta (Fragment) OS=Rattus norvegicus OX=10116 GN=Sucla2 PE=2 SV=1
65	414	46.83	3	3	14366000	0.156881	2	2	3	Formylation	93715	P97564|GPAT1_RAT	0.0588787	65	1180	47.36	3	3	1162400	0.00923695	2	2	3	Formylation	93715	Glycerol-3-phosphate acyltransferase 1 mitochondrial OS=Rattus norvegicus OX=10116 GN=Gpam PE=1 SV=3
67	1940	58.4	2	2	418350	0.00456851	2	2	3		102908	A2VCW9|AASS_RAT	3.42939	34	742	139.69	8	8	1971600	0.0156672	7	7	7	Carbamidomethylation	102908	Alpha-aminoadipic semialdehyde synthase mitochondrial OS=Rattus norvegicus OX=10116 GN=Aass PE=2 SV=1
69	293	51.98	12	12	767510	0.00838144	3	3	3	Oxidation (M)	32433	Q9WVK3|PECR_RAT	0.369114	52	283	55.65	13	13	389320	0.00309371	4	3	5	Oxidation (M)	32433	Peroxisomal trans-2-enoyl-CoA reductase OS=Rattus norvegicus OX=10116 GN=Pecr PE=2 SV=1
77	244	43.78	6	6	214350	0.00234077	2	1	3		34973	P07824|ARGI1_RAT	-	198	190	38.36	4	4	0	0	1	1	1		34973	Arginase-1 OS=Rattus norvegicus OX=10116 GN=Arg1 PE=1 SV=2
85	11963	66.58	2	2	2745300	0.0299795	2	2	2		113869	tr|Q5BJZ3|Q5BJZ3_RAT	0.127384	95	321	55.11	2	2	480580	0.0038189	2	2	2		113869	Nicotinamide nucleotide transhydrogenase OS=Rattus norvegicus OX=10116 GN=Nnt PE=1 SV=1
95	6075	30.79	1	1	5427400	0.0592689	2	2	2	Formylation	119588	D3ZG52|DNA2_RAT	1.7305	55	760	35.17	3	3	12907000	0.102565	4	3	4	Formylation	119588	DNA replication ATP-dependent helicase/nuclease DNA2 OS=Rattus norvegicus OX=10116 GN=Dna2 PE=3 SV=1
107	623	38.05	5	5	851720	0.00930104	2	2	2		46777	tr|G3V6I5|G3V6I5_RAT	0.180467	160	341	28.64	3	3	211230	0.00167853	1	1	1		46777	DnaJ heat shock protein family (Hsp40) member A3 OS=Rattus norvegicus OX=10116 GN=Dnaja3 PE=1 SV=2
108	228	26.63	3	3	300990	0.0032869	2	2	2		75316	P16970|ABCD3_RAT	-							0						ATP-binding cassette sub-family D member 3 OS=Rattus norvegicus OX=10116 GN=Abcd3 PE=1 SV=3
110	2022	46.07	5	5	844660	0.00922394	1	1	2		28295	Q9Z0V6|PRDX3_RAT	1.78633	61	5863	84.56	9	9	2073500	0.016477	3	3	4		28295	Thioredoxin-dependent peroxide reductase mitochondrial OS=Rattus norvegicus OX=10116 GN=Prdx3 PE=1 SV=2
112	219	51.73	6	6	506980	0.00553638	2	2	2		22305	P04041|GPX1_RAT	0.634726	70	53	56.38	13	13	442220	0.00351408	3	3	3		22305	Glutathione peroxidase 1 OS=Rattus norvegicus OX=10116 GN=Gpx1 PE=1 SV=4
115	233	63.43	4	4	581710	0.00635245	2	2	2		38202	P29147|BDH_RAT	1.84349	108	61	42.54	5	5	1473700	0.0117107	2	2	2		38202	D-beta-hydroxybutyrate dehydrogenase mitochondrial OS=Rattus norvegicus OX=10116 GN=Bdh1 PE=1 SV=2
116	380	42.91	7	7	565230	0.00617248	2	2	2		27246	O70351|HCD2_RAT	2.54248	44	188	98.87	13	13	1974900	0.0156934	5	5	5		27246	3-hydroxyacyl-CoA dehydrogenase type-2 OS=Rattus norvegicus OX=10116 GN=Hsd17b10 PE=1 SV=3
169	162	42.44	4	4	499600	0.00545578	1	1	1	Oxidation (M)	33215	tr|Q5EBA4|Q5EBA4_RAT	0.641014	83	143	70.7	8	8	440100	0.00349723	2	2	3	Oxidation (M)	33215	Nipsnap1 protein (Fragment) OS=Rattus norvegicus OX=10116 GN=Nipsnap1 PE=2 SV=1
195	6337	23.69	2	2	244940	0.00267482	1	1	1		60733	P17178|CP27A_RAT	0.818911	110	59	32.33	5	5	275650	0.00219044	2	2	2		60733	Sterol 26-hydroxylase mitochondrial OS=Rattus norvegicus OX=10116 GN=Cyp27a1 PE=1 SV=1
216	198	42.96	3	3	74258	0.00081092	1	1	1		49522	P85834|EFTU_RAT	14.1424	50	3	94.86	7	7	1443200	0.0114683	4	4	5		49522	Elongation factor Tu mitochondrial OS=Rattus norvegicus OX=10116 GN=Tufm PE=1 SV=1
						0						tr|D3ZTP0|D3ZTP0_RAT	+	32	6375	76.77	6	6	2779100	0.022084	6	6	8		101806	10-formyltetrahydrofolate dehydrogenase OS=Rattus norvegicus OX=10116 GN=Aldh1l2 PE=1 SV=3
						0						D3ZX08|SYAM_RAT	+	37	1414	46.08	2	2	305160	0.00242494	3	2	6		107806	Alanine--tRNA ligase mitochondrial OS=Rattus norvegicus OX=10116 GN=Aars2 PE=3 SV=1
						0						P08011|MGST1_RAT	+	38	250	71.07	15	15	1101000	0.00874904	5	5	6		17472	Microsomal glutathione S-transferase 1 OS=Rattus norvegicus OX=10116 GN=Mgst1 PE=1 SV=3
						0						P26772|CH10_RAT	+	39	28533	122.56	38	38	1075300	0.00854482	6	6	6	Oxidation (M)		10 kDa heat shock protein, mitochondrial
						0						P32198|CPT1A_RAT	+	76	1322	62.37	3	3	169930	0.00135034	2	2	3		88126	Carnitine O-palmitoyltransferase 1 liver isoform OS=Rattus norvegicus OX=10116 GN=Cpt1a PE=1 SV=2
						0						P19804|NDKB_RAT	+	78	34377	74.8	15	15	793250	0.00630352	2	2	3	Formylation	17283	Nucleoside diphosphate kinase B OS=Rattus norvegicus OX=10116 GN=Nme2 PE=1 SV=1
						0						Q3KR86|MIC60_RAT	+	90	110	74.63	3	3	1524400	0.0121136	2	2	2		67177	MICOS complex subunit Mic60 (Fragment) OS=Rattus norvegicus OX=10116 GN=Immt PE=1 SV=1
						0						Q5XII9|MFR1L_RAT	+	120	5882	35.65	5	5	383020	0.00304365	2	1	2		31730	Mitochondrial fission regulator 1-like OS=Rattus norvegicus OX=10116 GN=Mtfr1l PE=1 SV=1
106	28163	21.38	5	5	4460100	0.0487056	1	1	2	Formylation	30798	Q9R1Z0|VDAC3_RAT	-							0						Voltage-dependent anion-selective channel protein 3 OS=Rattus norvegicus OX=10116 GN=Vdac3 PE=1 SV=2
					9157254498	100													12584235940	100
																			1.25842e+08
					9.15725e+07
																			1.25842e+08

## Sheet: RLM SM-BM Monomer Big Differenc
Area (IBAQ)	riBAQ	Accession	rIBAQ PTP/Control	Area (IBAQ)	riBAQ	Description
CONTROL	%			PTP	%
Complex I
		tr|A0A0G2JVL6|A0A0G2JVL6_RAT	+	139230	0.00110638	NADH dehydrogenase (Ubiquinone) 1 beta subcomplex 11 (Predicted) OS=Rattus norvegicus OX=10116 GN=Ndufb11 PE=1 SV=1
		tr|D4A7L4|D4A7L4_RAT	+	135780	0.00107897	NADH dehydrogenase [ubiquinone] 1 alpha subcomplex subunit 8 OS=Rattus norvegicus OX=10116 GN=Ndufa8 PE=1 SV=1
		tr|D4A0T0|D4A0T0_RAT	+	434220	0.00345051	NADH:ubiquinone oxidoreductase subunit B10 OS=Rattus norvegicus OX=10116 GN=Ndufb10 PE=1 SV=1
					0
Complex III					0
2660100	0.0290491	Q68FY0|QCR1_RAT	0.410219	1499600	0.0119165	Cytochrome b-c1 complex subunit 1 mitochondrial OS=Rattus norvegicus OX=10116 GN=Uqcrc1 PE=1 SV=1
323100	0.00352835	P00159|CYB_RAT	2.15209	955560	0.00759331	Cytochrome b OS=Rattus norvegicus OX=10116 GN=CYTB PE=3 SV=1
369530	0.00403538	P20788|UCRI_RAT	4.21014	2138000	0.0169895	Cytochrome b (Fragment) OS=Rattus norvegicus OX=10116 GN=cytb PE=3 SV=1
396150	0.00432608	Q5M9I5|QCR6_RAT	-	0	0	Cytochrome b-c1 complex subunit 6 mitochondrial OS=Rattus norvegicus OX=10116 GN=Uqcrh PE=3 SV=1
	0				0
Complex IV					0
	0	P11240|COX5A_RAT	+	529460	0.00420733	Cytochrome c oxidase subunit 5A mitochondrial OS=Rattus norvegicus OX=10116 GN=Cox5a PE=1 SV=1
	0	P35171|CX7A2_RAT	+	311870	0.00247826	Cytochrome c oxidase subunit 2 OS=Rattus norvegicus OX=10116 GN=Mt-co2 PE=1 SV=1
	0	P10888|COX41_RAT	+	237750	0.00188927	Cytochrome c oxidase subunit 4 isoform 1 mitochondrial OS=Rattus norvegicus OX=10116 GN=Cox4i1 PE=1 SV=1
	0				0
Complex V					0
5323500	0.0581342	P29419|ATP5I_RAT	9.0368	66111000	0.525348	ATP synthase subunit e mitochondrial OS=Rattus norvegicus OX=10116 GN=Atp5me PE=1 SV=3
4150100	0.0453204	P21571|ATP5J_RAT	7.9783	45502000	0.361579	ATP synthase-coupling factor 6 mitochondrial OS=Rattus norvegicus OX=10116 GN=Atp5pf PE=1 SV=1
	0	D3Z9R8|ATP68_RAT	+	306390	0.00243471	ATP synthase subunit ATP5MPL mitochondrial OS=Rattus norvegicus OX=10116 GN=Atp5mpl PE=1 SV=1
	0	P29418|ATP5E_RAT	+	727560	0.00578152	ATP synthase subunit epsilon mitochondrial OS=Rattus norvegicus OX=10116 GN=Atp5f1e PE=1 SV=2
	0				0
Other					0
15340000	0.167517	Q02253|MMSA_RAT	0.400948	8452300	0.0671658	Methylmalonate-semialdehyde dehydrogenase [acylating] mitochondrial OS=Rattus norvegicus OX=10116 GN=Aldh6a1 PE=1 SV=1
23897000	0.260962	P0C2X9|AL4A1_RAT	0.483037	15863000	0.126055	Delta-1-pyrroline-5-carboxylate dehydrogenase mitochondrial OS=Rattus norvegicus OX=10116 GN=Aldh4a1 PE=1 SV=1
8447200	0.092246	P10860|DHE3_RAT	10.1598	117940000	0.937204	Glutamate dehydrogenase 1, mitochondrial
1883600	0.0205695	Q8CGU6|NICA_RAT	-		0	Nicastrin OS=Rattus norvegicus OX=10116 GN=Ncstn PE=1 SV=1
1237900	0.0135182	P24329|THTR_RAT	2.73253	4648500	0.0369391	Thiosulfate sulfurtransferase OS=Rattus norvegicus OX=10116 GN=Tst PE=1 SV=3
406090	0.00443463	Q924S5|LONM_RAT	2.10209	1173100	0.00932198	Lon protease homolog mitochondrial OS=Rattus norvegicus OX=10116 GN=Lonp1 PE=2 SV=1
509790	0.00556706	A0A0G2K047|ACSS3_RAT	0.217123	152110	0.00120873	Acyl-CoA synthetase short-chain family member 3 mitochondrial OS=Rattus norvegicus OX=10116 GN=Acss3 PE=1 SV=1
14366000	0.156881	P97564|GPAT1_RAT	0.0588787	1162400	0.00923695	Glycerol-3-phosphate acyltransferase 1 mitochondrial OS=Rattus norvegicus OX=10116 GN=Gpam PE=1 SV=3
418350	0.00456851	A2VCW9|AASS_RAT	3.42939	1971600	0.0156672	Alpha-aminoadipic semialdehyde synthase mitochondrial OS=Rattus norvegicus OX=10116 GN=Aass PE=2 SV=1
767510	0.00838144	Q9WVK3|PECR_RAT	0.369114	389320	0.00309371	Peroxisomal trans-2-enoyl-CoA reductase OS=Rattus norvegicus OX=10116 GN=Pecr PE=2 SV=1
214350	0.00234077	P07824|ARGI1_RAT	-	0	0	Arginase-1 OS=Rattus norvegicus OX=10116 GN=Arg1 PE=1 SV=2
2745300	0.0299795	tr|Q5BJZ3|Q5BJZ3_RAT	0.127384	480580	0.0038189	Nicotinamide nucleotide transhydrogenase OS=Rattus norvegicus OX=10116 GN=Nnt PE=1 SV=1
851720	0.00930104	tr|G3V6I5|G3V6I5_RAT	0.180467	211230	0.00167853	DnaJ heat shock protein family (Hsp40) member A3 OS=Rattus norvegicus OX=10116 GN=Dnaja3 PE=1 SV=2
300990	0.0032869	P16970|ABCD3_RAT	-		0	ATP-binding cassette sub-family D member 3 OS=Rattus norvegicus OX=10116 GN=Abcd3 PE=1 SV=3
565230	0.00617248	O70351|HCD2_RAT	2.54248	1974900	0.0156934	3-hydroxyacyl-CoA dehydrogenase type-2 OS=Rattus norvegicus OX=10116 GN=Hsd17b10 PE=1 SV=3
74258	0.00081092	P85834|EFTU_RAT	14.1424	1443200	0.0114683	Elongation factor Tu mitochondrial OS=Rattus norvegicus OX=10116 GN=Tufm PE=1 SV=1
	0	tr|D3ZTP0|D3ZTP0_RAT	+	2779100	0.022084	10-formyltetrahydrofolate dehydrogenase OS=Rattus norvegicus OX=10116 GN=Aldh1l2 PE=1 SV=3
	0	D3ZX08|SYAM_RAT	+	305160	0.00242494	Alanine--tRNA ligase mitochondrial OS=Rattus norvegicus OX=10116 GN=Aars2 PE=3 SV=1
	0	P08011|MGST1_RAT	+	1101000	0.00874904	Microsomal glutathione S-transferase 1 OS=Rattus norvegicus OX=10116 GN=Mgst1 PE=1 SV=3
	0	P26772|CH10_RAT	+	1075300	0.00854482	10 kDa heat shock protein, mitochondrial
	0	P32198|CPT1A_RAT	+	169930	0.00135034	Carnitine O-palmitoyltransferase 1 liver isoform OS=Rattus norvegicus OX=10116 GN=Cpt1a PE=1 SV=2
	0	P19804|NDKB_RAT	+	793250	0.00630352	Nucleoside diphosphate kinase B OS=Rattus norvegicus OX=10116 GN=Nme2 PE=1 SV=1
	0	Q3KR86|MIC60_RAT	+	1524400	0.0121136	MICOS complex subunit Mic60 (Fragment) OS=Rattus norvegicus OX=10116 GN=Immt PE=1 SV=1
	0	Q5XII9|MFR1L_RAT	+	383020	0.00304365	Mitochondrial fission regulator 1-like OS=Rattus norvegicus OX=10116 GN=Mtfr1l PE=1 SV=1
4460100	0.0487056	Q9R1Z0|VDAC3_RAT	-		0	Voltage-dependent anion-selective channel protein 3 OS=Rattus norvegicus OX=10116 GN=Vdac3 PE=1 SV=2

## Sheet: RLM KCl-BM Dimer All
Protein Group	Protein ID	Score (%)	-10lgP	Coverage (%)	#Peptides	#Unique	Area (IBAQ)	riBAQ	PTM	Avg. Mass	Accession	rIBAQ PTP/Control	Protein Group	Protein ID	Score (%)	-10lgP	Coverage (%)	#Peptides	#Unique	Area (IBAQ)	riBAQ	PTM	Avg. Mass	Description
							CONTROL	%												PTP	%
Complex I
15	25	98.9	158.7	22	5	5	2680900	0.27353	Y	30226	tr|D3ZG43|D3ZG43_RAT	1.0557	40	36	98.9	185.13	21	4	4	14115000	0.288765	N	30226	NADH dehydrogenase (Ubiquinone) Fe-S protein 3 (Predicted), isoform CRA_c OS=Rattus norvegicus OX=10116 GN=Ndufs3 PE=1 SV=1
14	6	99.1	155.91	13	7	7	4688500	0.478364	N	79412	Q66HF1|NDUS1_RAT	1.38872	19	12	99.2	242.11	22	13	13	32472000	0.664312	N	79412	NADH-ubiquinone oxidoreductase 75 kDa subunit, mitochondrial OS=Rattus norvegicus OX=10116 GN=Ndufs1 PE=1 SV=1
17	15	98.7	121.86	16	4	4	701120	0.0715348	Y	42559	Q5BK63|NDUA9_RAT	2.41533	22	14	99.1	196.06	27	9	9	8445600	0.17278	Y	42559	NADH dehydrogenase [ubiquinone] 1 alpha subcomplex subunit 9, mitochondrial OS=Rattus norvegicus OX=10116 GN=Ndufa9 PE=1 SV=2
20	33	97.9	102.64	17	4	4	1898400	0.193692	Y	40493	Q561S0|NDUAA_RAT	0.123651	58	23	98.3	128.01	15	3	3	1170700	0.0239502	N	40493	NADH dehydrogenase [ubiquinone] 1 alpha subcomplex subunit 10, mitochondrial OS=Rattus norvegicus OX=10116 GN=Ndufa10 PE=1 SV=1
26	23	97.3	73.84	10	3	3	146380	0.014935	N	50731	tr|Q5XIH3|Q5XIH3_RAT	6.4738	26	21	99.1	151.14	18	7	7	4726100	0.0966866	N	50731	NADH dehydrogenase [ubiquinone] flavoprotein 1, mitochondrial OS=Rattus norvegicus OX=10116 GN=Ndufv1 PE=1 SV=1
95	95	61.7	67.98	22	1	1	0	0	N	13412	Q63362|NDUA5_RAT	+	196	170	61.7	97.71	22	1	1	0	0	N	13412	NADH dehydrogenase [ubiquinone] 1 alpha subcomplex subunit 5 OS=Rattus norvegicus OX=10116 GN=Ndufa5 PE=1 SV=3
96	42	61.6	50.27	12	1	1	69212	0.00706165	N	21664	tr|D4A565|D4A565_RAT	12.2928	44	93	98.6	167.21	28	4	4	4243200	0.0868074	N	21664	NADH dehydrogenase (Ubiquinone) 1 beta subcomplex, 5 (Predicted), isoform CRA_b OS=Rattus norvegicus OX=10116 GN=Ndufb5 PE=1 SV=1
97	29	61.3	41.71	8	1	1	282740	0.0288478	N	20859	tr|D4A0T0|D4A0T0_RAT	4.63599	34	54	98.6	200.87	28	5	5	6537200	0.133738	Y	20859	NADH:ubiquinone oxidoreductase subunit B10 OS=Rattus norvegicus OX=10116 GN=Ndufb10 PE=1 SV=1
99	34	60	34.81	6	1	1	196860	0.0200855	N	23945	tr|Q5RJN0|Q5RJN0_RAT	2.39603	62	67	83.1	78.15	11	2	2	2352400	0.0481254	N	23945	NADH dehydrogenase (Ubiquinone) Fe-S protein 7 OS=Rattus norvegicus OX=10116 GN=Ndufs7 PE=1 SV=1
100	22	58.1	33.1	5	1	1	2019900	0.206089	N	27378	P19234|NDUV2_RAT	1.47006	33	58	98.8	126.7	24	4	4	14809000	0.302963	N	27378	NADH dehydrogenase [ubiquinone] flavoprotein 2, mitochondrial OS=Rattus norvegicus OX=10116 GN=Ndufv2 PE=1 SV=2
119	52	33.3	21.84	4	1	1	0	0	N	23970	tr|B0BNE6|B0BNE6_RAT	+	87	60	77.1	43.56	8	2	2	129890	0.00265729	Y	23970	NADH dehydrogenase (Ubiquinone) Fe-S protein 8 (Predicted), isoform CRA_a OS=Rattus norvegicus OX=10116 GN=Ndufs8 PE=1 SV=1
110	38	40.7	23.69	8	1	1	134410	0.0137138	N	15224	tr|D4A3V2|D4A3V2_RAT	0.926847	199	88	61.3	41.62	8	1	1	621300	0.0127106	N	15224	NADH dehydrogenase [ubiquinone] 1 alpha subcomplex subunit 6 OS=Rattus norvegicus OX=10116 GN=Ndufa6 PE=1 SV=1
								0			tr|B2RYS8|B2RYS8_RAT	+	85	73	84.3	106.22	15	2	2	1986100	0.0406316	N	21959	NADH dehydrogenase [ubiquinone] 1 beta subcomplex subunit 8, mitochondrial OS=Rattus norvegicus OX=10116 GN=Ndufb8 PE=1 SV=1
								0			tr|Q5PQZ9|Q5PQZ9_RAT	+	64	112	76.1	97.41	21	3	3	638550	0.0130635	N	14359	NADH dehydrogenase [ubiquinone] 1 subunit C2 OS=Rattus norvegicus OX=10116 GN=Ndufc2 PE=1 SV=1
								0			tr|F1LPG5|F1LPG5_RAT	+	84	71	84.4	82.67	29	2	2	1846400	0.0377737	N	15064	NADH:ubiquinone oxidoreductase subunit B4 OS=Rattus norvegicus OX=10116 GN=Ndufb4 PE=1 SV=1
								0			tr|A9UMV9|A9UMV9_RAT	+	152	104	68.9	61.39	11	1	1	407550	0.00833766	N	12500	NADH:ubiquinone oxidoreductase subunit A7 OS=Rattus norvegicus OX=10116 GN=Ndufa7 PE=1 SV=1
								0			tr|B2RYW3|B2RYW3_RAT	+	89	113	73.5	44.46	11	2	2	1696700	0.0347111	N	21892	NADH dehydrogenase (Ubiquinone) 1 beta subcomplex, 9 OS=Rattus norvegicus OX=10116 GN=Ndufb9 PE=1 SV=1
								0			Q641Y2|NDUS2_RAT	+	71	24	94.1	108.84	5	2	2	4160900	0.0851237	N	52562	NADH dehydrogenase [ubiquinone] iron-sulfur protein 2, mitochondrial OS=Rattus norvegicus OX=10116 GN=Ndufs2 PE=1 SV=1
								0			tr|D3ZE15|D3ZE15_RAT	+	91	100	61.3	54.88	7	2	2	1861700	0.0380867	N	16777	NADH:ubiquinone oxidoreductase subunit A13 OS=Rattus norvegicus OX=10116 GN=Ndufa13 PE=1 SV=1
								0			P52504|NDUS6_RAT	+	151	178	61.7	58.66	9	1	1	865090	0.017698	N	12783	NADH dehydrogenase [ubiquinone] iron-sulfur protein 6, mitochondrial OS=Rattus norvegicus OX=10116 GN=Ndufs6 PE=3 SV=1
								0			tr|D3ZF13|D3ZF13_RAT	+	56	105	92.8	118.09	15	3	3	3263000	0.0667545	N	17514	Acyl carrier protein OS=Rattus norvegicus OX=10116 GN=Ndufab1 PE=1 SV=1
Complex III
19	1	98.6	125.75	17	5	5	2291000	0.233749	N	48396	P32551|QCR2_RAT	-	83	1	84.4	104.52	6	2	2	0	0	N	48396	Cytochrome b-c1 complex subunit 2, mitochondrial OS=Rattus norvegicus OX=10116 GN=Uqcrc2 PE=1 SV=2
35	12	61.7	85.46	5	2	2	43626	0.00445113	N	52849	Q68FY0|QCR1_RAT	-	154	15	64.2	43.38	5	1	1	0	0	N	52849	Cytochrome b-c1 complex subunit 1, mitochondrial OS=Rattus norvegicus OX=10116 GN=Uqcrc1 PE=1 SV=1
Complex IV
36	109	61.6	49.51	21	1	1	29933	0.00305404	N	16130	P11240|COX5A_RAT	-	197	158	61.7	62.99	17	1	1	0	0	N	16130	Cytochrome c oxidase subunit 5A, mitochondrial OS=Rattus norvegicus OX=10116 GN=Cox5a PE=1 SV=1
101	158	57.7	32.32	14	1	1	493200	0.0503208	N	13915	P12075|COX5B_RAT	0.736752	201	133	60.2	37.15	14	1	1	1812200	0.037074	N	13915	Cytochrome c oxidase subunit 5B, mitochondrial OS=Rattus norvegicus OX=10116 GN=Cox5b PE=1 SV=2
111	51	40.5	43914	4	1	1	0	0	N	19515	P10888|COX41_RAT	+	42	50	98.8	126.18	24	4	4	4134200	0.0845775	N	19515	Cytochrome c oxidase subunit 4 isoform 1, mitochondrial OS=Rattus norvegicus OX=10116 GN=Cox4i1 PE=1 SV=1
								0			P00406|COX2_RAT	+	86	81	77.3	44.27	7	2	2	2403600	0.0491729	Y	25928	Cytochrome c oxidase subunit 2 OS=Rattus norvegicus OX=10116 GN=Mtco2 PE=1 SV=3
Complex V
2	14	99.2	382.48	66	51	51	277360000	28.2988	Y	59754	P15999|ATPA_RAT	1.02301	2	13	99.2	460.42	70	75	75	1415100000	28.9501	Y	59754	ATP synthase subunit alpha, mitochondrial OS=Rattus norvegicus OX=10116 GN=Atp5f1a PE=1 SV=2
1	7	99.2	366.27	86	50	50	369900000	37.7406	Y	56354	P10719|ATPB_RAT	0.914903	1	8	99.2	449.64	81	64	64	1687800000	34.529	Y	56354	ATP synthase subunit beta, mitochondrial OS=Rattus norvegicus OX=10116 GN=Atp5f1b PE=1 SV=2
6	116	99.2	229.61	57	16	1	513120	0.0523533	Y	30191	P35435|ATPG_RAT	6.39297	7	97	99.2	283.88	65	19	1	16360000	0.334693	Y	30191	ATP synthase subunit gamma, mitochondrial OS=Rattus norvegicus OX=10116 GN=Atp5f1c PE=1 SV=2
10	4260	99.2	218.85	74	12	12	14806000	1.51065	Y	18763	P31399|ATP5H_RAT	1.5769	13	204	99.2	266.61	80	16	16	116440000	2.38213	Y	18763	ATP synthase subunit d, mitochondrial OS=Rattus norvegicus OX=10116 GN=Atp5pd PE=1 SV=3
8	41	99.1	208.5	46	13	12	44029000	4.49225	N	28869	P19511|AT5F1_RAT	1.14239	9	114	99.2	275.26	55	19	19	250850000	5.13189	Y	28869	ATP synthase F(0) complex subunit B1, mitochondrial OS=Rattus norvegicus OX=10116 GN=Atp5pb PE=1 SV=1
11	2163	99.1	158.27	49	10	10	17943000	1.83071	Y	23398	Q06647|ATPO_RAT	2.43479	12	188	99.2	245.52	65	22	22	217880000	4.45739	Y	23398	ATP synthase subunit O, mitochondrial OS=Rattus norvegicus OX=10116 GN=Atp5po PE=1 SV=1
13	4261	99.1	146.01	61	7	7	24198000	2.4689	Y	17563	tr|G3V7Y3|G3V7Y3_RAT	0.634397	17	168	99.1	258.55	61	11	11	76560000	1.56626	Y	17563	ATP synthase subunit delta, mitochondrial OS=Rattus norvegicus OX=10116 GN=Atp5f1d PE=1 SV=1
22	4263	98.4	127.48	46	3	3	1928000	0.196712	Y	11433	Q6PDU7|ATP5L_RAT	1.14451	35	4490	84.4	133.19	34	2	2	11005000	0.22514	Y	11433	ATP synthase subunit g, mitochondrial OS=Rattus norvegicus OX=10116 GN=Atp5mg PE=1 SV=2
29	4270	84.2	126.91	38	3	3	2369300	0.241738	N	6408	Q9JJW3|ATPMD_RAT	0.872862	90	4499	61.7	139.63	28	2	2	10314000	0.211004	N	6408	ATP synthase membrane subunit DAPIT, mitochondrial OS=Rattus norvegicus OX=10116 GN=Atp5md PE=1 SV=1
21	4264	98.4	99.48	46	3	3	5060900	0.51636	N	7642	tr|Q5UAJ5|Q5UAJ5_RAT	1.06616	45	4487	98.4	105.48	46	3	3	26910000	0.550525	N	7642	ATP synthase protein 8 OS=Rattus norvegicus OX=10116 GN=ATP8 PE=3 SV=1
28	4266	96.2	52.4	30	3	3	3083900	0.314648	Y	10452	D3ZAF6|ATPK_RAT	1.62937	25	4488	97.5	95.42	40	7	7	25060000	0.512678	Y	10452	ATP synthase subunit f, mitochondrial OS=Rattus norvegicus OX=10116 GN=Atp5mf PE=1 SV=1
98	4273	60.9	39.16	16	1	1	437370	0.0446245	N	5767	P29418|ATP5E_RAT	2.45792	59	4489	95.4	79.32	41	3	3	5361400	0.109684	N	5767	ATP synthase subunit epsilon, mitochondrial OS=Rattus norvegicus OX=10116 GN=Atp5f1e PE=1 SV=2
105	2187	41.7	25.94	5	1	1	3196100	0.326096	N	14244	Q06645|AT5G1_RAT	0.706472	92	4509	38.3	24.35	5	1	1	11261000	0.230378	N	14244	ATP synthase F(0) complex subunit C1, mitochondrial OS=Rattus norvegicus OX=10116 GN=Atp5mc1 PE=1 SV=1
5	117		221.49	25	16	1	2453300	0.250308	Y	67721	tr|Q6QI09|Q6QI09_RAT	1.18518	11	95	99.2	277.73	30	20	2	14501000	0.296661	Y	67721	ATP synthase subunit gamma, mitochondrial OS=Rattus norvegicus OX=10116 GN=Taf3 PE=1 SV=1
								0			D3Z9R8|ATP68_RAT	+	61	4494	84.3	123.36	32	3	3	4396500	0.0899436	Y	6914	ATP synthase subunit ATP5MPL, mitochondrial OS=Rattus norvegicus OX=10116 GN=Atp5mpl PE=1 SV=1
								0			P29419|ATP5I_RAT	+	43	4486	98.6	101.05	52	4	4	15392000	0.31489	N	8255	ATP synthase subunit e, mitochondrial OS=Rattus norvegicus OX=10116 GN=Atp5me PE=1 SV=3
								0			P21571|ATP5J_RAT	+	63	4496	81.8	98.83	28	2	2	830950	0.0169996	N	12494	ATP synthase-coupling factor 6, mitochondrial OS=Rattus norvegicus OX=10116 GN=Atp5pf PE=1 SV=1
Other
R	4	99.2	275.36	86	23	23	71777000	7.32336	N	29820	P67779|PHB_RAT	0.834455	5	16	99.2	293.28	85	30	29	298710000	6.11101	Y	29820	Prohibitin OS=Rattus norvegicus OX=10116 GN=Phb PE=1 SV=1
3	11	99.2	267.91	73	28	28	66230000	6.7574	Y	33312	Q5XIH7|PHB2_RAT	0.0133328	3	18	99.2	275.42	75	30	1	4403900	0.090095	Y	33312	Prohibitin-2 OS=Rattus norvegicus OX=10116 GN=Phb2 PE=1 SV=1
7	2	99.2	242.74	48	21	21	23705000	2.4186	Y	57808	Q02253|MMSA_RAT	0.0292566	55	64	98.4	153.04	10	3	3	3458800	0.0707601	N	57808	Methylmalonate-semialdehyde dehydrogenase [acylating], mitochondrial OS=Rattus norvegicus OX=10116 GN=Aldh6a1 PE=1 SV=1
9	9	99.2	202.5	40	16	16	23694000	2.41748	Y	47314	P00507|AATM_RAT	0.704141	15	4	99.2	238.5	39	18	18	83207000	1.70225	Y	47314	Aspartate aminotransferase, mitochondrial OS=Rattus norvegicus OX=10116 GN=Got2 PE=1 SV=2
12	13	99.1	170.01	6	9	9	1524800	0.155574	Y	164579	P07756|CPSM_RAT	14.0047	6	3	99.2	355.54	32	37	37	106500000	2.17878	Y	164579	Carbamoyl-phosphate synthase [ammonia], mitochondrial OS=Rattus norvegicus OX=10116 GN=Cps1 PE=1 SV=1
16	21	98.6	164.25	10	6	6	4189000	0.427401	N	82665	Q64428|ECHA_RAT	1.7418	10	5	99.2	315.18	36	26	25	36389000	0.744446	Y	82665	Trifunctional enzyme subunit alpha, mitochondrial OS=Rattus norvegicus OX=10116 GN=Hadha PE=1 SV=2
24	19	93.3	63.14	4	2	2	1662400	0.169613	N	56912	P22791|HMCS2_RAT	10.5098	8	10	99.2	330.14	44	27	27	87135000	1.78261	Y	56912	Hydroxymethylglutaryl-CoA synthase, mitochondrial OS=Rattus norvegicus OX=10116 GN=Hmgcs2 PE=1 SV=1
18	179	80.3	36.06	2	3	2	2036300	0.207762	Y	140418	F1M775|DIAP1_RAT	2.13302	31	539	61.2	36.97	2	3	3	21662000	0.443161	Y	140418	Protein diaphanous homolog 1 OS=Rattus norvegicus OX=10116 GN=Diaph1 PE=1 SV=3
113	4292	34.3	22.71	7	1	1	2025700	0.206681	Y	40772	B0K035|MTFR2_RAT	-									0			Mitochondrial fission regulator 2 OS=Rattus norvegicus OX=10116 GN=Mtfr2 PE=2 SV=1
47	53		32.92	2	1	1	312410	0.031875	N	129777	P52873|PYC_RAT	21.8302	14	6	99.2	258	20	20	20	34013000	0.695838	Y	129777	Pyruvate carboxylase, mitochondrial OS=Rattus norvegicus OX=10116 GN=Pc PE=1 SV=2
								0			P10860|DHE3_RAT	+	16	2	99.2	319.64	36	19	19	61338000	1.25485	Y	61416	Glutamate dehydrogenase 1, mitochondrial OS=Rattus norvegicus OX=10116 GN=Glud1 PE=1 SV=2
								0			tr|A0A0G2KB63|A0A0G2KB63_RAT	+	4	19	99.2	274.47	76	30	1	2528600	0.0517301	Y	33168	Prohibitin OS=Rattus norvegicus OX=10116 GN=Phb2 PE=1 SV=1
								0			P18163|ACSL1_RAT	+	20	28	99.2	213.5	15	11	8	10176000	0.208181	N	78179	Long-chain-fatty-acid--CoA ligase 1 OS=Rattus norvegicus OX=10116 GN=Acsl1 PE=1 SV=1
								0			Q9WVK3|PECR_RAT	+	23	48	99.1	204.95	37	8	8	11917000	0.243798	Y	32433	Peroxisomal trans-2-enoyl-CoA reductase OS=Rattus norvegicus OX=10116 GN=Pecr PE=2 SV=1
								0			P13086|SUCA_RAT	+	24	32	99	193.77	17	5	5	8044300	0.16457	Y	36148	Succinate--CoA ligase [ADP/GDP-forming] subunit alpha, mitochondrial OS=Rattus norvegicus OX=10116 GN=Suclg1 PE=2 SV=2
								0			Q60587|ECHB_RAT	+	21	31	99.2	176.17	22	9	9	13498000	0.276142	Y	51414	Trifunctional enzyme subunit beta, mitochondrial OS=Rattus norvegicus OX=10116 GN=Hadhb PE=1 SV=1
								0			P24329|THTR_RAT	+	27	55	99	169.31	23	5	5	7435600	0.152118	N	33407	Thiosulfate sulfurtransferase OS=Rattus norvegicus OX=10116 GN=Tst PE=1 SV=3
								0			P17764|THIL_RAT	+	41	46	98.9	162.52	12	4	4	2189300	0.0447887	N	44695	Acetyl-CoA acetyltransferase, mitochondrial OS=Rattus norvegicus OX=10116 GN=Acat1 PE=1 SV=1
								0			P29147|BDH_RAT	+	32	39	98.9	155.31	15	5	5	6003700	0.122824	N	38202	D-beta-hydroxybutyrate dehydrogenase, mitochondrial OS=Rattus norvegicus OX=10116 GN=Bdh1 PE=1 SV=2
								0			P85834|EFTU_RAT	+	30	27	99	145	13	5	5	4037800	0.0826053	N	49522	Elongation factor Tu, mitochondrial OS=Rattus norvegicus OX=10116 GN=Tufm PE=1 SV=1
								0			O70351|HCD2_RAT	+	48	76	95.6	121.91	16	3	3	2753200	0.056325	N	27246	3-hydroxyacyl-CoA dehydrogenase type-2 OS=Rattus norvegicus OX=10116 GN=Hsd17b10 PE=1 SV=3
								0			tr|Q7TP12|Q7TP12_RAT	+	200	228	61.2	39.81	10	1	1	1252600	0.0256257	N	14969	Cc2-17 OS=Rattus norvegicus OX=10116 GN=Sqor PE=1 SV=1
								0			P63039|CH60_RAT	+	29	61	94.2	139.8	7	4	4	18976000	0.388211	N	60956	60 kDa heat shock protein, mitochondrial OS=Rattus norvegicus OX=10116 GN=Hspd1 PE=1 SV=1
								0			Q3KR86|MIC60_RAT	+	36	30	94	81.55	6	3	3	5965000	0.122032	N	67177	MICOS complex subunit Mic60 (Fragment) OS=Rattus norvegicus OX=10116 GN=Immt PE=1 SV=1
								0			P0C2X9|AL4A1_RAT	+	37	47	98.8	171.46	9	4	4	3731900	0.0763472	N	61869	Delta-1-pyrroline-5-carboxylate dehydrogenase, mitochondrial OS=Rattus norvegicus OX=10116 GN=Aldh4a1 PE=1 SV=1
								0			B3DMA2|ACD11_RAT	+	39	53	95.4	89.68	4	4	4	3247200	0.0664312	N	87371	Acyl-CoA dehydrogenase family member 11 OS=Rattus norvegicus OX=10116 GN=Acad11 PE=1 SV=1
								0			P16970|ABCD3_RAT	+	49	44	94.2	122.68	5	2	2	1969000	0.0402818	N	75316	ATP-binding cassette sub-family D member 3 OS=Rattus norvegicus OX=10116 GN=Abcd3 PE=1 SV=3
								0			tr|A0A0U1RRV5|A0A0U1RRV5_RAT	+	50	1062	77.7	41.98	2	3	2	6711400	0.137302	Y	151165	Clustered mitochondria protein homolog OS=Rattus norvegicus OX=10116 GN=Cluh PE=1 SV=1
								0			P04762|CATA_RAT	+	60	103	94.7	75.08	8	3	3	1307100	0.0267407	N	59757	Catalase OS=Rattus norvegicus OX=10116 GN=Cat PE=1 SV=3
								0			tr|D3ZXA6|D3ZXA6_RAT	+	74	482	63.2	29.61	3	2	2	2048500	0.0419082	N	98819	Pyruvate dehydrogenase phosphatase regulatory subunit OS=Rattus norvegicus OX=10116 GN=Pdpr PE=1 SV=1
								0			tr|G3V728|G3V728_RAT	+	77	52	89.8	88.7	8	2	2	2658700	0.0543917	N	33346	4-nitrophenylphosphatase domain and non-neuronal SNAP25-like protein homolog 1 (C. elegans), isoform CRA_b OS=Rattus norvegicus OX=10116 GN=Nipsnap1 PE=1 SV=1
								0			tr|F1LMJ8|F1LMJ8_RAT	+	81	701	47	24.29	5	2	2	6004200	0.122834	N	49215	Calcium uptake protein 2, mitochondrial OS=Rattus norvegicus OX=10116 GN=Micu2 PE=1 SV=1
								0			tr|D3ZXF9|D3ZXF9_RAT	+	88	106	74.2	80.57	9	2	2	952090	0.0194779	Y	29441	Mitochondrial ribosomal protein L12 OS=Rattus norvegicus OX=10116 GN=Mrpl12 PE=1 SV=1
								0			tr|G3V6I4|G3V6I4_RAT	+	106	248	76	98.24	9	1	1	1562300	0.0319615	N	37791	Mitochondrial amidoxime reducing component 1 OS=Rattus norvegicus OX=10116 GN=Marc1 PE=1 SV=1
								0			tr|D3ZUJ5|D3ZUJ5_RAT	+	112	1624	55.1	25.99	8	1	1	2021600	0.0413579	Y	23973	Deoxythymidylate kinase OS=Rattus norvegicus OX=10116 GN=Dtymk PE=1 SV=1
								0			tr|D3ZFJ6|D3ZFJ6_RAT	+	125	96	74	37.93	7	1	1	889180	0.0181908	N	60420	Lactamase, beta OS=Rattus norvegicus OX=10116 GN=Lactb PE=1 SV=1
								0			Q09073|ADT2_RAT	+	51	63	98	69.12	10	3	3	2645600	0.0541237	N	32901	ADP/ATP translocase 2 OS=Rattus norvegicus OX=10116 GN=Slc25a5 PE=1 SV=3
							980110781	100												4888062800	100
							9.80111e+06
																				48880628
							9.80111e+06
																				48880628

## Sheet: RLM KCl-BM Dimer Big Difference
Area (IBAQ)	riBAQ	Accession	rIBAQ PTP/Control	Area (IBAQ)	riBAQ	Description
CONTROL	%			PTP	%
Complex I
1898400	0.193692	Q561S0|NDUAA_RAT	0.123651	1170700	0.0239502	NADH dehydrogenase [ubiquinone] 1 alpha subcomplex subunit 10, mitochondrial OS=Rattus norvegicus OX=10116 GN=Ndufa10 PE=1 SV=1
146380	0.014935	tr|Q5XIH3|Q5XIH3_RAT	6.4738	4726100	0.0966866	NADH dehydrogenase [ubiquinone] flavoprotein 1, mitochondrial OS=Rattus norvegicus OX=10116 GN=Ndufv1 PE=1 SV=1
69212	0.00706165	tr|D4A565|D4A565_RAT	12.2928	4243200	0.0868074	NADH dehydrogenase (Ubiquinone) 1 beta subcomplex, 5 (Predicted), isoform CRA_b OS=Rattus norvegicus OX=10116 GN=Ndufb5 PE=1 SV=1
282740	0.0288478	tr|D4A0T0|D4A0T0_RAT	4.63599	6537200	0.133738	NADH:ubiquinone oxidoreductase subunit B10 OS=Rattus norvegicus OX=10116 GN=Ndufb10 PE=1 SV=1
196860	0.0200855	tr|Q5RJN0|Q5RJN0_RAT	2.39603	2352400	0.0481254	NADH dehydrogenase (Ubiquinone) Fe-S protein 7 OS=Rattus norvegicus OX=10116 GN=Ndufs7 PE=1 SV=1
0	0	tr|B0BNE6|B0BNE6_RAT	+	129890	0.00265729	NADH dehydrogenase (Ubiquinone) Fe-S protein 8 (Predicted), isoform CRA_a OS=Rattus norvegicus OX=10116 GN=Ndufs8 PE=1 SV=1
	0	tr|B2RYS8|B2RYS8_RAT	+	1986100	0.0406316	NADH dehydrogenase [ubiquinone] 1 beta subcomplex subunit 8, mitochondrial OS=Rattus norvegicus OX=10116 GN=Ndufb8 PE=1 SV=1
	0	tr|Q5PQZ9|Q5PQZ9_RAT	+	638550	0.0130635	NADH dehydrogenase [ubiquinone] 1 subunit C2 OS=Rattus norvegicus OX=10116 GN=Ndufc2 PE=1 SV=1
	0	tr|F1LPG5|F1LPG5_RAT	+	1846400	0.0377737	NADH:ubiquinone oxidoreductase subunit B4 OS=Rattus norvegicus OX=10116 GN=Ndufb4 PE=1 SV=1
	0	tr|A9UMV9|A9UMV9_RAT	+	407550	0.00833766	NADH:ubiquinone oxidoreductase subunit A7 OS=Rattus norvegicus OX=10116 GN=Ndufa7 PE=1 SV=1
	0	tr|B2RYW3|B2RYW3_RAT	+	1696700	0.0347111	NADH dehydrogenase (Ubiquinone) 1 beta subcomplex, 9 OS=Rattus norvegicus OX=10116 GN=Ndufb9 PE=1 SV=1
	0	Q641Y2|NDUS2_RAT	+	4160900	0.0851237	NADH dehydrogenase [ubiquinone] iron-sulfur protein 2, mitochondrial OS=Rattus norvegicus OX=10116 GN=Ndufs2 PE=1 SV=1
	0	tr|D3ZE15|D3ZE15_RAT	+	1861700	0.0380867	NADH:ubiquinone oxidoreductase subunit A13 OS=Rattus norvegicus OX=10116 GN=Ndufa13 PE=1 SV=1
	0	P52504|NDUS6_RAT	+	865090	0.017698	NADH dehydrogenase [ubiquinone] iron-sulfur protein 6, mitochondrial OS=Rattus norvegicus OX=10116 GN=Ndufs6 PE=3 SV=1
	0	tr|D3ZF13|D3ZF13_RAT	+	3263000	0.0667545	Acyl carrier protein OS=Rattus norvegicus OX=10116 GN=Ndufab1 PE=1 SV=1
Complex III
2291000	0.233749	P32551|QCR2_RAT	-	0	0	Cytochrome b-c1 complex subunit 2, mitochondrial OS=Rattus norvegicus OX=10116 GN=Uqcrc2 PE=1 SV=2
43626	0.00445113	Q68FY0|QCR1_RAT	-	0	0	Cytochrome b-c1 complex subunit 1, mitochondrial OS=Rattus norvegicus OX=10116 GN=Uqcrc1 PE=1 SV=1
Complex IV
29933	0.00305404	P11240|COX5A_RAT	-	0	0	Cytochrome c oxidase subunit 5A, mitochondrial OS=Rattus norvegicus OX=10116 GN=Cox5a PE=1 SV=1
0	0	P10888|COX41_RAT	+	4134200	0.0845775	Cytochrome c oxidase subunit 4 isoform 1, mitochondrial OS=Rattus norvegicus OX=10116 GN=Cox4i1 PE=1 SV=1
	0	P00406|COX2_RAT	+	2403600	0.0491729	Cytochrome c oxidase subunit 2 OS=Rattus norvegicus OX=10116 GN=Mtco2 PE=1 SV=3
Complex V
513120	0.0523533	P35435|ATPG_RAT	6.39297	16360000	0.334693	ATP synthase subunit gamma, mitochondrial OS=Rattus norvegicus OX=10116 GN=Atp5f1c PE=1 SV=2
17943000	1.83071	Q06647|ATPO_RAT	2.43479	217880000	4.45739	ATP synthase subunit O, mitochondrial OS=Rattus norvegicus OX=10116 GN=Atp5po PE=1 SV=1
437370	0.0446245	P29418|ATP5E_RAT	2.45792	5361400	0.109684	ATP synthase subunit epsilon, mitochondrial OS=Rattus norvegicus OX=10116 GN=Atp5f1e PE=1 SV=2
	0	D3Z9R8|ATP68_RAT	+	4396500	0.0899436	ATP synthase subunit ATP5MPL, mitochondrial OS=Rattus norvegicus OX=10116 GN=Atp5mpl PE=1 SV=1
	0	P29419|ATP5I_RAT	+	15392000	0.31489	ATP synthase subunit e, mitochondrial OS=Rattus norvegicus OX=10116 GN=Atp5me PE=1 SV=3
	0	P21571|ATP5J_RAT	+	830950	0.0169996	ATP synthase-coupling factor 6, mitochondrial OS=Rattus norvegicus OX=10116 GN=Atp5pf PE=1 SV=1
Other
66230000	6.7574	Q5XIH7|PHB2_RAT	0.0133328	4403900	0.090095	Prohibitin-2 OS=Rattus norvegicus OX=10116 GN=Phb2 PE=1 SV=1
23705000	2.4186	Q02253|MMSA_RAT	0.0292566	3458800	0.0707601	Methylmalonate-semialdehyde dehydrogenase [acylating], mitochondrial OS=Rattus norvegicus OX=10116 GN=Aldh6a1 PE=1 SV=1
1524800	0.155574	P07756|CPSM_RAT	14.0047	106500000	2.17878	Carbamoyl-phosphate synthase [ammonia], mitochondrial OS=Rattus norvegicus OX=10116 GN=Cps1 PE=1 SV=1
1662400	0.169613	P22791|HMCS2_RAT	10.5098	87135000	1.78261	Hydroxymethylglutaryl-CoA synthase, mitochondrial OS=Rattus norvegicus OX=10116 GN=Hmgcs2 PE=1 SV=1
2036300	0.207762	F1M775|DIAP1_RAT	2.13302	21662000	0.443161	Protein diaphanous homolog 1 OS=Rattus norvegicus OX=10116 GN=Diaph1 PE=1 SV=3
2025700	0.206681	B0K035|MTFR2_RAT	-		0	Mitochondrial fission regulator 2 OS=Rattus norvegicus OX=10116 GN=Mtfr2 PE=2 SV=1
312410	0.031875	P52873|PYC_RAT	21.8302	34013000	0.695838	Pyruvate carboxylase, mitochondrial OS=Rattus norvegicus OX=10116 GN=Pc PE=1 SV=2
	0	P10860|DHE3_RAT	+	61338000	1.25485	Glutamate dehydrogenase 1, mitochondrial OS=Rattus norvegicus OX=10116 GN=Glud1 PE=1 SV=2
	0	tr|A0A0G2KB63|A0A0G2KB63_RAT	+	2528600	0.0517301	Prohibitin OS=Rattus norvegicus OX=10116 GN=Phb2 PE=1 SV=1
	0	P18163|ACSL1_RAT	+	10176000	0.208181	Long-chain-fatty-acid--CoA ligase 1 OS=Rattus norvegicus OX=10116 GN=Acsl1 PE=1 SV=1
	0	Q9WVK3|PECR_RAT	+	11917000	0.243798	Peroxisomal trans-2-enoyl-CoA reductase OS=Rattus norvegicus OX=10116 GN=Pecr PE=2 SV=1
	0	P13086|SUCA_RAT	+	8044300	0.16457	Succinate--CoA ligase [ADP/GDP-forming] subunit alpha, mitochondrial OS=Rattus norvegicus OX=10116 GN=Suclg1 PE=2 SV=2
	0	Q60587|ECHB_RAT	+	13498000	0.276142	Trifunctional enzyme subunit beta, mitochondrial OS=Rattus norvegicus OX=10116 GN=Hadhb PE=1 SV=1
	0	P24329|THTR_RAT	+	7435600	0.152118	Thiosulfate sulfurtransferase OS=Rattus norvegicus OX=10116 GN=Tst PE=1 SV=3
	0	P17764|THIL_RAT	+	2189300	0.0447887	Acetyl-CoA acetyltransferase, mitochondrial OS=Rattus norvegicus OX=10116 GN=Acat1 PE=1 SV=1
	0	P29147|BDH_RAT	+	6003700	0.122824	D-beta-hydroxybutyrate dehydrogenase, mitochondrial OS=Rattus norvegicus OX=10116 GN=Bdh1 PE=1 SV=2
	0	P85834|EFTU_RAT	+	4037800	0.0826053	Elongation factor Tu, mitochondrial OS=Rattus norvegicus OX=10116 GN=Tufm PE=1 SV=1
	0	O70351|HCD2_RAT	+	2753200	0.056325	3-hydroxyacyl-CoA dehydrogenase type-2 OS=Rattus norvegicus OX=10116 GN=Hsd17b10 PE=1 SV=3
	0	tr|Q7TP12|Q7TP12_RAT	+	1252600	0.0256257	Cc2-17 OS=Rattus norvegicus OX=10116 GN=Sqor PE=1 SV=1
	0	P63039|CH60_RAT	+	18976000	0.388211	60 kDa heat shock protein, mitochondrial OS=Rattus norvegicus OX=10116 GN=Hspd1 PE=1 SV=1
	0	Q3KR86|MIC60_RAT	+	5965000	0.122032	MICOS complex subunit Mic60 (Fragment) OS=Rattus norvegicus OX=10116 GN=Immt PE=1 SV=1
	0	P0C2X9|AL4A1_RAT	+	3731900	0.0763472	Delta-1-pyrroline-5-carboxylate dehydrogenase, mitochondrial OS=Rattus norvegicus OX=10116 GN=Aldh4a1 PE=1 SV=1
	0	B3DMA2|ACD11_RAT	+	3247200	0.0664312	Acyl-CoA dehydrogenase family member 11 OS=Rattus norvegicus OX=10116 GN=Acad11 PE=1 SV=1
	0	P16970|ABCD3_RAT	+	1969000	0.0402818	ATP-binding cassette sub-family D member 3 OS=Rattus norvegicus OX=10116 GN=Abcd3 PE=1 SV=3
	0	tr|A0A0U1RRV5|A0A0U1RRV5_RAT	+	6711400	0.137302	Clustered mitochondria protein homolog OS=Rattus norvegicus OX=10116 GN=Cluh PE=1 SV=1
	0	P04762|CATA_RAT	+	1307100	0.0267407	Catalase OS=Rattus norvegicus OX=10116 GN=Cat PE=1 SV=3
	0	tr|D3ZXA6|D3ZXA6_RAT	+	2048500	0.0419082	Pyruvate dehydrogenase phosphatase regulatory subunit OS=Rattus norvegicus OX=10116 GN=Pdpr PE=1 SV=1
	0	tr|G3V728|G3V728_RAT	+	2658700	0.0543917	4-nitrophenylphosphatase domain and non-neuronal SNAP25-like protein homolog 1 (C. elegans), isoform CRA_b OS=Rattus norvegicus OX=10116 GN=Nipsnap1 PE=1 SV=1
	0	tr|F1LMJ8|F1LMJ8_RAT	+	6004200	0.122834	Calcium uptake protein 2, mitochondrial OS=Rattus norvegicus OX=10116 GN=Micu2 PE=1 SV=1
	0	tr|D3ZXF9|D3ZXF9_RAT	+	952090	0.0194779	Mitochondrial ribosomal protein L12 OS=Rattus norvegicus OX=10116 GN=Mrpl12 PE=1 SV=1
	0	tr|G3V6I4|G3V6I4_RAT	+	1562300	0.0319615	Mitochondrial amidoxime reducing component 1 OS=Rattus norvegicus OX=10116 GN=Marc1 PE=1 SV=1
	0	tr|D3ZUJ5|D3ZUJ5_RAT	+	2021600	0.0413579	Deoxythymidylate kinase OS=Rattus norvegicus OX=10116 GN=Dtymk PE=1 SV=1
	0	tr|D3ZFJ6|D3ZFJ6_RAT	+	889180	0.0181908	Lactamase, beta OS=Rattus norvegicus OX=10116 GN=Lactb PE=1 SV=1
	0	Q09073|ADT2_RAT	+	2645600	0.0541237	ADP/ATP translocase 2 OS=Rattus norvegicus OX=10116 GN=Slc25a5 PE=1 SV=3

[truncated: 2 more sheets: RLM KCl-BM Monomer All, RLM KCl-BM Monomer Big Differen]
