# Supplementary material for: Mitochondrial F-ATP Synthase Co-Migrating Proteins and Ca2+-Dependent Formation of Large Channels
Source: Cells. 2023 Oct 7;12(19):2414. doi: 10.3390/cells12192414 (PMC10572550; doi:10.3390/cells12192414)
Supplement: Supplementary file 1 [file cells-12-02414-s001.zip › Dataset S8.xlsx]

## Sheet: RHM PTP I-III(2)-IV(H)
Protein Group	Protein ID	Accession	-10lgP	Coverage (%)	Coverage (%) Sample 2	IBAQ	#Peptides	#Unique	#Spec Sample 2	PTM	Avg. Mass	Description
5	5	P10719|ATPB_RAT	293.04	21	21	34889000	44	44	98	Oxidation (M)	56354	ATP synthase subunit beta mitochondrial OS=Rattus norvegicus OX=10116 GN=Atp5f1b PE=1 SV=2
5	6	tr|G3V6D3|G3V6D3_RAT	293.04	21	21	34889000	44	44	98	Oxidation (M)	56345	ATP synthase subunit beta OS=Rattus norvegicus OX=10116 GN=Atp5f1b PE=1 SV=1
1	20	Q66HF1|NDUS1_RAT	261.24	25	25	47014000	57	56	134	Carbamidomethylation	79412	NADH-ubiquinone oxidoreductase 75 kDa subunit mitochondrial OS=Rattus norvegicus OX=10116 GN=Ndufs1 PE=1 SV=1
6	58	P20788|UCRI_RAT	241.84	41	41	33680000	31	31	81	Oxidation (M)	29446	Cytochrome b-c1 complex subunit Rieske mitochondrial OS=Rattus norvegicus OX=10116 GN=Uqcrfs1 PE=1 SV=2
2	37	P19234|NDUV2_RAT	236.79	46	46	70446000	36	36	109	Formylation	27378	NADH dehydrogenase [ubiquinone] flavoprotein 2 mitochondrial OS=Rattus norvegicus OX=10116 GN=Ndufv2 PE=1 SV=2
15	59	tr|D3ZFQ8|D3ZFQ8_RAT	227.59	24	24	38213000	19	19	55	Oxidation (M)	35435	Cytochrome c-1 OS=Rattus norvegicus OX=10116 GN=Cyc1 PE=1 SV=3
21	212	tr|B2RYS8|B2RYS8_RAT	226.48	30	30	17312000	18	18	41	Oxidation (M)	21959	NADH dehydrogenase [ubiquinone] 1 beta subcomplex subunit 8 mitochondrial OS=Rattus norvegicus OX=10116 GN=Ndufb8 PE=1 SV=1
9	89	tr|L0L4L8|L0L4L8_RAT	222.24	24	24	1963100	28	1	66		42470	Cytochrome b (Fragment) OS=Rattus norvegicus OX=10116 GN=cytb PE=3 SV=1
9	91	tr|A0A140GE10|A0A140GE10_RAT	222.24	24	24	1963100	28	1	66		42574	Cytochrome b (Fragment) OS=Rattus norvegicus OX=10116 PE=3 SV=1
9	92	tr|A0A140GE11|A0A140GE11_RAT	222.24	24	24	1963100	28	1	66		42588	Cytochrome b (Fragment) OS=Rattus norvegicus OX=10116 PE=3 SV=1
9	95	tr|A0A385HCC9|A0A385HCC9_RAT	222.24	24	24	1963100	28	1	66		42766	Cytochrome b (Fragment) OS=Rattus norvegicus OX=10116 PE=3 SV=1
9	96	tr|A0A3Q8AGE8|A0A3Q8AGE8_RAT	222.24	24	24	1963100	28	1	66		42712	Cytochrome b (Fragment) OS=Rattus norvegicus OX=10116 GN=Cytb PE=3 SV=1
9	97	tr|A0A3Q8AC68|A0A3Q8AC68_RAT	222.24	24	24	1963100	28	1	66		42622	Cytochrome b (Fragment) OS=Rattus norvegicus OX=10116 GN=Cytb PE=3 SV=1
9	100	tr|A0A3S6FM15|A0A3S6FM15_RAT	222.24	24	24	1963100	28	1	66		42698	Cytochrome b (Fragment) OS=Rattus norvegicus OX=10116 GN=Cytb PE=3 SV=1
9	102	tr|A0A220D9Z6|A0A220D9Z6_RAT	222.24	23	23	1963100	28	1	66		43018	Cytochrome b OS=Rattus norvegicus OX=10116 PE=3 SV=1
9	103	tr|D6NSP2|D6NSP2_RAT	222.24	23	23	1963100	28	1	66		42945	Cytochrome b (Fragment) OS=Rattus norvegicus OX=10116 GN=cytb PE=3 SV=1
9	104	tr|D6NSS6|D6NSS6_RAT	222.24	23	23	1963100	28	1	66		42993	Cytochrome b (Fragment) OS=Rattus norvegicus OX=10116 GN=cytb PE=3 SV=1
9	106	tr|D6NSQ3|D6NSQ3_RAT	222.24	23	23	1963100	28	1	66		43012	Cytochrome b (Fragment) OS=Rattus norvegicus OX=10116 GN=cytb PE=3 SV=1
9	107	tr|D6NSR3|D6NSR3_RAT	222.24	23	23	1963100	28	1	66		42986	Cytochrome b (Fragment) OS=Rattus norvegicus OX=10116 GN=cytb PE=3 SV=1
9	110	tr|D6NSR8|D6NSR8_RAT	222.24	23	23	1963100	28	1	66		42998	Cytochrome b (Fragment) OS=Rattus norvegicus OX=10116 GN=cytb PE=3 SV=1
9	113	tr|A0A0A1FZ42|A0A0A1FZ42_RAT	222.24	23	23	1963100	28	1	66		42989	Cytochrome b OS=Rattus norvegicus OX=10116 GN=CYTB PE=3 SV=1
9	114	tr|D6NSS7|D6NSS7_RAT	222.24	23	23	1963100	28	1	66		42948	Cytochrome b (Fragment) OS=Rattus norvegicus OX=10116 GN=cytb PE=3 SV=1
9	115	tr|Q8SEY9|Q8SEY9_RAT	222.24	23	23	1963100	28	1	66		43015	Cytochrome b OS=Rattus norvegicus OX=10116 GN=cytb PE=3 SV=1
9	116	tr|D6NSR7|D6NSR7_RAT	222.24	23	23	1963100	28	1	66		42982	Cytochrome b (Fragment) OS=Rattus norvegicus OX=10116 GN=cytb PE=3 SV=1
9	117	tr|A0A220DA44|A0A220DA44_RAT	222.24	23	23	1963100	28	1	66		42968	Cytochrome b OS=Rattus norvegicus OX=10116 PE=3 SV=1
9	120	tr|D6NSQ0|D6NSQ0_RAT	222.24	23	23	1963100	28	1	66		42968	Cytochrome b (Fragment) OS=Rattus norvegicus OX=10116 GN=cytb PE=3 SV=1
9	121	tr|Q5UAI7|Q5UAI7_RAT	222.24	23	23	1963100	28	1	66		42998	Cytochrome b OS=Rattus norvegicus OX=10116 GN=CYTB PE=3 SV=1
9	122	tr|D6NSR2|D6NSR2_RAT	222.24	23	23	1963100	28	1	66		43073	Cytochrome b (Fragment) OS=Rattus norvegicus OX=10116 GN=cytb PE=3 SV=1
9	123	tr|A0A0S1Z1V9|A0A0S1Z1V9_RAT	222.24	23	23	1963100	28	1	66		43002	Cytochrome b OS=Rattus norvegicus OX=10116 GN=CYTB PE=3 SV=1
9	125	tr|Q8HIC4|Q8HIC4_RAT	222.24	23	23	1963100	28	1	66		43012	Cytochrome b OS=Rattus norvegicus OX=10116 GN=Mt-cyb PE=3 SV=1
9	126	tr|A0A220DA02|A0A220DA02_RAT	222.24	23	23	1963100	28	1	66		42968	Cytochrome b OS=Rattus norvegicus OX=10116 PE=3 SV=1
9	128	tr|A0A0S1Z1V4|A0A0S1Z1V4_RAT	222.24	23	23	1963100	28	1	66		43016	Cytochrome b OS=Rattus norvegicus OX=10116 GN=CYTB PE=3 SV=1
9	129	tr|R9TKN1|R9TKN1_RAT	222.24	23	23	1963100	28	1	66		43012	Cytochrome b OS=Rattus norvegicus OX=10116 GN=CYTB PE=3 SV=1
9	130	P00159|CYB_RAT	222.24	23	23	1963100	28	1	66		43012	Cytochrome b OS=Rattus norvegicus OX=10116 GN=Mt-Cyb PE=3 SV=3
9	131	tr|L0N311|L0N311_RAT	222.24	23	23	1963100	28	1	66		43045	Cytochrome b (Fragment) OS=Rattus norvegicus OX=10116 GN=cytb PE=3 SV=1
9	132	tr|A0A220DA28|A0A220DA28_RAT	222.24	23	23	1963100	28	1	66		42970	Cytochrome b OS=Rattus norvegicus OX=10116 PE=3 SV=1
9	133	tr|H2KXA0|H2KXA0_RAT	222.24	23	23	1963100	28	1	66		42978	Cytochrome b (Fragment) OS=Rattus norvegicus OX=10116 GN=cytb PE=3 SV=1
9	134	tr|A0A096XNM4|A0A096XNM4_RAT	222.24	23	23	1963100	28	1	66		43042	Cytochrome b (Fragment) OS=Rattus norvegicus OX=10116 PE=3 SV=1
9	135	tr|D6NSP5|D6NSP5_RAT	222.24	23	23	1963100	28	1	66		43012	Cytochrome b (Fragment) OS=Rattus norvegicus OX=10116 GN=cytb PE=3 SV=1
9	86	tr|A0A411P2L0|A0A411P2L0_RAT	222.24	24	24	1963100	28	1	66		41017	Cytochrome b (Fragment) OS=Rattus norvegicus OX=10116 GN=Cytb PE=3 SV=1
9	88	tr|A0A411P2K0|A0A411P2K0_RAT	222.24	24	24	1963100	28	1	66		42238	Cytochrome b (Fragment) OS=Rattus norvegicus OX=10116 GN=Cytb PE=3 SV=1
9	108	tr|D6NSP4|D6NSP4_RAT	222.24	23	23	1963100	28	1	66		43016	Cytochrome b (Fragment) OS=Rattus norvegicus OX=10116 GN=cytb PE=3 SV=1
9	124	tr|D6NSR1|D6NSR1_RAT	222.24	23	23	1963100	28	1	66		43002	Cytochrome b (Fragment) OS=Rattus norvegicus OX=10116 GN=cytb PE=3 SV=1
12	99	tr|A0A385HC93|A0A385HC93_RAT	218.35	24	24	221650	28	1	63		42751	Cytochrome b (Fragment) OS=Rattus norvegicus OX=10116 PE=3 SV=1
4	26	Q641Y2|NDUS2_RAT	217.68	29	29	42134000	41	41	106	Oxidation (M)	52562	NADH dehydrogenase [ubiquinone] iron-sulfur protein 2 mitochondrial OS=Rattus norvegicus OX=10116 GN=Ndufs2 PE=1 SV=1
10	25	Q68FY0|QCR1_RAT	216.29	23	23	20981000	32	32	64	Carbamidomethylation	52849	Cytochrome b-c1 complex subunit 1 mitochondrial OS=Rattus norvegicus OX=10116 GN=Uqcrc1 PE=1 SV=1
7	16	P02563|MYH6_RAT	214.15	15	15	11262000	44	44	71	Oxidation (M)
23	60	tr|D4A565|D4A565_RAT	207.02	37	37	10453000	20	19	35		21664	NADH dehydrogenase (Ubiquinone) 1 beta subcomplex 5 (Predicted) isoform CRA_b OS=Rattus norvegicus OX=10116 GN=Ndufb5 PE=1 SV=1
3	50	P32551|QCR2_RAT	206.62	24	24	69015000	35	33	106	Oxidation (M)	48396	Cytochrome b-c1 complex subunit 2 mitochondrial OS=Rattus norvegicus OX=10116 GN=Uqcrc2 PE=1 SV=2
8	8	P15999|ATPA_RAT	199.95	27	27	18337000	29	29	71	Oxidation (M)	59754	ATP synthase subunit alpha mitochondrial OS=Rattus norvegicus OX=10116 GN=Atp5f1a PE=1 SV=2
8	9	tr|F1LP05|F1LP05_RAT	199.95	27	27	18337000	29	29	71	Oxidation (M)	59813	ATP synthase subunit alpha OS=Rattus norvegicus OX=10116 GN=Atp5f1a PE=1 SV=1
30	248	tr|A9UMW2|A9UMW2_RAT	195.52	42	42	13363000	11	11	29	Oxidation (M)	9255	Ndufa3 protein (Fragment) OS=Rattus norvegicus OX=10116 GN=Ndufa3 PE=2 SV=1
30	250	tr|A0A0G2KAA3|A0A0G2KAA3_RAT	195.52	38	38	13363000	11	11	29	Oxidation (M)	10170	NADH:ubiquinone oxidoreductase subunit A3 OS=Rattus norvegicus OX=10116 GN=Ndufa3 PE=1 SV=1
30	249	tr|M0RB63|M0RB63_RAT	195.52	42	42	13363000	11	11	29	Oxidation (M)	9372	RCG63041 OS=Rattus norvegicus OX=10116 GN=LOC684509 PE=4 SV=1
26	14	Q6AXV4|SAM50_RAT	189.34	18	18	4890300	17	17	31		51960	Sorting and assembly machinery component 50 homolog OS=Rattus norvegicus OX=10116 GN=Samm50 PE=1 SV=1
13	74	tr|D3ZG43|D3ZG43_RAT	188.8	41	41	19488000	27	27	58		30226	NADH dehydrogenase (Ubiquinone) Fe-S protein 3 (Predicted) isoform CRA_c OS=Rattus norvegicus OX=10116 GN=Ndufs3 PE=1 SV=1
16	136	tr|Q9G898|Q9G898_RAT	187.73	23	23	0	26	1	54		42830	Cytochrome b OS=Rattus norvegicus OX=10116 PE=2 SV=1
14	49	Q5BK63|NDUA9_RAT	185.88	29	29	11496000	25	25	56	Oxidation (M)	42559	NADH dehydrogenase [ubiquinone] 1 alpha subcomplex subunit 9 mitochondrial OS=Rattus norvegicus OX=10116 GN=Ndufa9 PE=1 SV=2
17	77	tr|Q5PQZ9|Q5PQZ9_RAT	185.82	44	44	20625000	16	16	48		14359	NADH dehydrogenase [ubiquinone] 1 subunit C2 OS=Rattus norvegicus OX=10116 GN=Ndufc2 PE=1 SV=1
38	200	P11240|COX5A_RAT	183.83	38	38	3159900	11	11	20		16130	Cytochrome c oxidase subunit 5A mitochondrial OS=Rattus norvegicus OX=10116 GN=Cox5a PE=1 SV=1
22	137	tr|Q06QK5|Q06QK5_RAT	182.41	11	11	12382000	19	19	38	Oxidation (M)	68606	NADH-ubiquinone oxidoreductase chain 5 OS=Rattus norvegicus OX=10116 GN=ND5 PE=3 SV=1
22	138	P11661|NU5M_RAT	182.41	11	11	12382000	19	19	38	Oxidation (M)	68618	NADH-ubiquinone oxidoreductase chain 5 OS=Rattus norvegicus OX=10116 GN=Mtnd5 PE=3 SV=3
22	139	tr|Q06QG6|Q06QG6_RAT	182.41	11	11	12382000	19	19	38	Oxidation (M)	68588	NADH-ubiquinone oxidoreductase chain 5 OS=Rattus norvegicus OX=10116 GN=ND5 PE=3 SV=1
22	140	tr|Q06QA1|Q06QA1_RAT	182.41	11	11	12382000	19	19	38	Oxidation (M)	68574	NADH-ubiquinone oxidoreductase chain 5 OS=Rattus norvegicus OX=10116 GN=ND5 PE=3 SV=1
22	141	tr|Q8SEZ0|Q8SEZ0_RAT	182.41	11	11	12382000	19	19	38	Oxidation (M)	68618	NADH-ubiquinone oxidoreductase chain 5 OS=Rattus norvegicus OX=10116 GN=Mt-nd5 PE=3 SV=1
22	142	tr|A0A096XKT9|A0A096XKT9_RAT	182.41	11	11	12382000	19	19	38	Oxidation (M)	68584	NADH-ubiquinone oxidoreductase chain 5 OS=Rattus norvegicus OX=10116 GN=ND5 PE=3 SV=1
28	161	tr|A0A0G2JVL6|A0A0G2JVL6_RAT	179.77	42	42	15643000	16	16	30	Carbamidomethylation	19965	NADH dehydrogenase [ubiquinone] 1 alpha subcomplex subunit 8 OS=Rattus norvegicus OX=10116 GN=Ndufa8 PE=1 SV=1
11	171	Q561S0|NDUAA_RAT	177.4	32	32	14301000	25	23	64	Oxidation (M)
35	160	tr|D4A7L4|D4A7L4_RAT	172.5	27	27	11930000	10	10	22	Oxidation (M)	17634	NADH dehydrogenase (Ubiquinone) 1 beta subcomplex 11 (Predicted) OS=Rattus norvegicus OX=10116 GN=Ndufb11 PE=1 SV=1
29	45	P00507|AATM_RAT	169.11	17	17	4506700	16	16	29	Oxidation (M)	47314	Aspartate aminotransferase mitochondrial OS=Rattus norvegicus OX=10116 GN=Got2 PE=1 SV=2
24	199	tr|B0BNE6|B0BNE6_RAT	168.87	25	25	8649100	16	16	33	Carbamidomethylation	23970	NADH dehydrogenase (Ubiquinone) Fe-S protein 8 (Predicted) isoform CRA_a OS=Rattus norvegicus OX=10116 GN=Ndufs8 PE=1 SV=1
32	252	tr|D3ZF13|D3ZF13_RAT	168.64	23	23	7485400	13	13	25	Oxidation (M)	17514	Acyl carrier protein OS=Rattus norvegicus OX=10116 GN=Ndufab1 PE=1 SV=1
39	211	tr|F1LXA0|F1LXA0_RAT	168.55	29	29	7779200	10	10	20		17178	NADH dehydrogenase [ubiquinone] 1 alpha subcomplex subunit 12 OS=Rattus norvegicus OX=10116 GN=Ndufa12 PE=1 SV=2
37	198	Q80W89|NDUAB_RAT	167.6	23	23	13802000	9	9	21		14854	NADH dehydrogenase [ubiquinone] 1 alpha subcomplex subunit 11 OS=Rattus norvegicus OX=10116 GN=Ndufa11 PE=2 SV=1
20	33	tr|S5RZM8|S5RZM8_RAT	164.42	40	40	10176000	20	20	42	Oxidation (M)	25958	Cytochrome c oxidase subunit 2 OS=Rattus norvegicus OX=10116 GN=COX2 PE=3 SV=1
20	34	P00406|COX2_RAT	164.42	40	40	10176000	20	20	42	Oxidation (M)	25928	Cytochrome c oxidase subunit 2 OS=Rattus norvegicus OX=10116 GN=Mtco2 PE=1 SV=3
20	28	tr|Q5UAJ6|Q5UAJ6_RAT	164.42	40	40	10176000	20	20	42	Oxidation (M)	25942	Cytochrome c oxidase subunit 2 OS=Rattus norvegicus OX=10116 GN=COX2 PE=3 SV=1
20	35	tr|Q8SEZ5|Q8SEZ5_RAT	164.42	40	40	10176000	20	20	42	Oxidation (M)	25928	Cytochrome c oxidase subunit 2 OS=Rattus norvegicus OX=10116 GN=Mt-co2 PE=1 SV=1
20	36	tr|A0A097PE04|A0A097PE04_RAT	164.42	40	40	10176000	20	20	42	Oxidation (M)	25894	Cytochrome c oxidase subunit 2 OS=Rattus norvegicus OX=10116 GN=COX2 PE=3 SV=1
18	313	tr|D3ZZ21|D3ZZ21_RAT	160.18	52	52	10816000	16	16	44	Oxidation (M)	15638	NADH dehydrogenase (Ubiquinone) 1 beta subcomplex 6 (Predicted) OS=Rattus norvegicus OX=10116 GN=Ndufb6 PE=1 SV=1
34	827	tr|D4A3V2|D4A3V2_RAT	157.67	44	44	4880800	19	19	24		15224	NADH dehydrogenase [ubiquinone] 1 alpha subcomplex subunit 6 OS=Rattus norvegicus OX=10116 GN=Ndufa6 PE=1 SV=1
19	80	tr|Q5XIH3|Q5XIH3_RAT	152.05	19	19	12588000	19	19	43	Oxidation (M)	50731	NADH dehydrogenase [ubiquinone] flavoprotein 1 mitochondrial OS=Rattus norvegicus OX=10116 GN=Ndufv1 PE=1 SV=1
53	65	P31399|ATP5H_RAT	151.97	29	29	2288300	7	7	12		18763	ATP synthase subunit d mitochondrial OS=Rattus norvegicus OX=10116 GN=Atp5pd PE=1 SV=3
25	474	tr|F1LN92|F1LN92_RAT	148.92	12	12	6052100	15	15	31	Oxidation (M)	89352	AFG3-like matrix AAA peptidase subunit 2 OS=Rattus norvegicus OX=10116 GN=Afg3l2 PE=1 SV=1
44	253	P10817|CX6A2_RAT	147.19	27	27	6523700	8	8	17		10487	Cytochrome c oxidase subunit 6A2 mitochondrial (Fragment) OS=Rattus norvegicus OX=10116 GN=Cox6a2 PE=1 SV=3
44	254	tr|G3V8M4|G3V8M4_RAT	147.19	26	26	6523700	8	8	17		10802	Cytochrome c oxidase subunit 6A mitochondrial OS=Rattus norvegicus OX=10116 GN=Cox6a2 PE=3 SV=1
27	172	tr|D4A0T0|D4A0T0_RAT	142.48	27	27	20924000	10	10	31		20859	NADH:ubiquinone oxidoreductase subunit B10 OS=Rattus norvegicus OX=10116 GN=Ndufb10 PE=1 SV=1
50	2	Q01205|ODO2_RAT	141.91	17	17	4054800	6	6	13	Oxidation (M)	48925	Dihydrolipoyllysine-residue succinyltransferase component of 2-oxoglutarate dehydrogenase complex mitochondrial OS=Rattus norvegicus OX=10116 GN=Dlst PE=1 SV=2
50	1	tr|G3V6P2|G3V6P2_RAT	141.91	17	17	4054800	6	6	13	Oxidation (M)	48899	Dihydrolipoamide S-succinyltransferase (E2 component of 2-oxo-glutarate complex) isoform CRA_a OS=Rattus norvegicus OX=10116 GN=Dlst PE=1 SV=1
54	251	P80432|COX7C_RAT	141.51	21	21	3437500	4	4	12		7375	Cytochrome c oxidase subunit 7C mitochondrial OS=Rattus norvegicus OX=10116 GN=Cox7c PE=1 SV=2
33	56	tr|F1LPG5|F1LPG5_RAT	139.49	35	35	10927000	9	9	24		15064	NADH:ubiquinone oxidoreductase subunit B4 OS=Rattus norvegicus OX=10116 GN=Ndufb4 PE=1 SV=1
33	57	tr|F1M7T1|F1M7T1_RAT	139.49	35	35	10927000	9	9	24		15160	NADH dehydrogenase (ubiquinone) 1 beta subcomplex 4 OS=Rattus norvegicus OX=10116 GN=LOC100361934 PE=4 SV=2
40	169	tr|A9UMV9|A9UMV9_RAT	134.78	38	38	26351000	7	7	20	Oxidation (M)	12500	NADH:ubiquinone oxidoreductase subunit A7 OS=Rattus norvegicus OX=10116 GN=Ndufa7 PE=1 SV=1
42	219	tr|D3ZS58|D3ZS58_RAT	130.27	19	19	3736600	7	7	18		10845	NADH dehydrogenase [ubiquinone] 1 alpha subcomplex subunit 2 OS=Rattus norvegicus OX=10116 GN=Ndufa2 PE=1 SV=1
36	29	Q60587|ECHB_RAT	130.16	15	15	2900300	14	14	21		51414	Trifunctional enzyme subunit beta mitochondrial OS=Rattus norvegicus OX=10116 GN=Hadhb PE=1 SV=1
31	72	tr|D3ZE15|D3ZE15_RAT	126.31	38	38	4351100	11	11	25	Oxidation (M)	16777	NADH:ubiquinone oxidoreductase subunit A13 OS=Rattus norvegicus OX=10116 GN=Ndufa13 PE=1 SV=1
49	318	Q5M9I5|QCR6_RAT	122.61	21	21	4596700	6	6	14		10424	Cytochrome b-c1 complex subunit 6 mitochondrial OS=Rattus norvegicus OX=10116 GN=Uqcrh PE=3 SV=1
43	10	tr|A0A0G2JVH4|A0A0G2JVH4_RAT	120.33	12	12	1857400	11	11	17		86230	MICOS complex subunit MIC60 OS=Rattus norvegicus OX=10116 GN=Immt PE=1 SV=1
46	532	P67779|PHB_RAT	119.94	17	17	1962800	8	8	15		29820	Prohibitin OS=Rattus norvegicus OX=10116 GN=Phb PE=1 SV=1
48	3899	tr|B5DEL8|B5DEL8_RAT	114.92	22	22	2268600	6	6	15		12700	NADH dehydrogenase (Ubiquinone) Fe-S protein 5 OS=Rattus norvegicus OX=10116 GN=Ndufs5 PE=1 SV=1
48	3900	tr|A0A0G2JZJ9|A0A0G2JZJ9_RAT	114.92	22	22	2268600	6	6	15		12730	Uncharacterized protein OS=Rattus norvegicus OX=10116 PE=4 SV=1
68	17	Q9ER34|ACON_RAT	109.74	3	3	1089700	4	4	7		85433	Aconitate hydratase mitochondrial OS=Rattus norvegicus OX=10116 GN=Aco2 PE=1 SV=2
61	238	Q5XIF3|NDUS4_RAT	104.1	15	15	3733400	4	4	9		19741	NADH dehydrogenase [ubiquinone] iron-sulfur protein 4 mitochondrial OS=Rattus norvegicus OX=10116 GN=Ndufs4 PE=1 SV=1
56	3906	tr|D3ZCZ9|D3ZCZ9_RAT	103.87	21	21	1369900	4	4	10		13040	NADH dehydrogenase [ubiquinone] iron-sulfur protein 6 mitochondrial OS=Rattus norvegicus OX=10116 GN=LOC100912599 PE=1 SV=1
66	61	Q63704|CPT1B_RAT	98.66	3	3	664360	3	3	7		88217	Carnitine O-palmitoyltransferase 1 muscle isoform OS=Rattus norvegicus OX=10116 GN=Cpt1b PE=1 SV=1
52	335	Q5XIH7|PHB2_RAT	98.45	14	14	5932100	9	9	12		33312	Prohibitin-2 OS=Rattus norvegicus OX=10116 GN=Phb2 PE=1 SV=1
55	3893	tr|B2RYS2|B2RYS2_RAT	93.22	28	28	3072800	8	7	11		13559	Cytochrome b-c1 complex subunit 7 OS=Rattus norvegicus OX=10116 GN=Uqcrb PE=1 SV=1
77	245	tr|C8CHS6|C8CHS6_RAT	91.52	17	17	651390	2	2	5		7988	Mitochondrial superoxide dismutase 2 (Fragment) OS=Rattus norvegicus OX=10116 PE=2 SV=1
77	71	P07895|SODM_RAT	91.52	5	5	651390	2	2	5		24674	Superoxide dismutase [Mn] mitochondrial OS=Rattus norvegicus OX=10116 GN=Sod2 PE=1 SV=2
71	3921	tr|Q06QD9|Q06QD9_RAT	90.75	6	6	906120	3	3	7		18943	NADH-ubiquinone oxidoreductase chain 6 OS=Rattus norvegicus OX=10116 GN=ND6 PE=3 SV=1
71	3922	tr|Q7HKW2|Q7HKW2_RAT	90.75	6	6	906120	3	3	7		18957	NADH-ubiquinone oxidoreductase chain 6 OS=Rattus norvegicus OX=10116 GN=NADH6 PE=3 SV=1
71	3930	tr|Q35733|Q35733_RAT	90.75	14	14	906120	3	3	7		8389	NADH-ubiquinone oxidoreductase chain 6 (Fragment) OS=Rattus norvegicus OX=10116 PE=3 SV=1
57	168	P19511|AT5F1_RAT	90.5	9	9	3084900	3	3	10		28869	ATP synthase F(0) complex subunit B1 mitochondrial OS=Rattus norvegicus OX=10116 GN=Atp5pb PE=1 SV=1
45	3901	tr|Q8SEZ8|Q8SEZ8_RAT	89.63	7	7	5208400	7	7	17		36133	NADH-ubiquinone oxidoreductase chain 1 (Fragment) OS=Rattus norvegicus OX=10116 GN=NADH1 PE=3 SV=1
45	3902	P03889|NU1M_RAT	89.63	7	7	5208400	7	7	17		36145	NADH-ubiquinone oxidoreductase chain 1 OS=Rattus norvegicus OX=10116 GN=Mtnd1 PE=1 SV=3
45	3903	tr|Q8HID1|Q8HID1_RAT	89.63	7	7	5208400	7	7	17		36145	NADH-ubiquinone oxidoreductase chain 1 OS=Rattus norvegicus OX=10116 GN=Mt-nd1 PE=3 SV=1
45	3904	tr|D2E6L7|D2E6L7_RAT	89.63	7	7	5208400	7	7	17		36062	NADH-ubiquinone oxidoreductase chain 1 OS=Rattus norvegicus OX=10116 GN=ND1 PE=3 SV=1
63	44	P17764|THIL_RAT	88.67	8	8	1492000	4	4	8		44695	Acetyl-CoA acetyltransferase mitochondrial OS=Rattus norvegicus OX=10116 GN=Acat1 PE=1 SV=1
70	207	P11951|CX6C2_RAT	87.07	38	38	851490	5	5	7	Oxidation (M)	8455	Cytochrome c oxidase subunit 6C-2 OS=Rattus norvegicus OX=10116 GN=Cox6c2 PE=1 SV=3
65	263	P35171|CX7A2_RAT	86.66	12	12	834410	3	3	8		9353	Cytochrome c oxidase subunit 7A2 mitochondrial OS=Rattus norvegicus OX=10116 GN=Cox7a2 PE=1 SV=1
65	264	tr|B2RYS0|B2RYS0_RAT	86.66	12	12	834410	3	3	8		9353	Cox7a2 protein OS=Rattus norvegicus OX=10116 GN=Cox7a2 PE=2 SV=1
75	4	P08461|ODP2_RAT	84.98	5	5	700240	4	4	5		67166	Dihydrolipoyllysine-residue acetyltransferase component of pyruvate dehydrogenase complex mitochondrial OS=Rattus norvegicus OX=10116 GN=Dlat PE=1 SV=3
74	63	P35435|ATPG_RAT	83.6	11	11	453290	4	4	6		30191	ATP synthase subunit gamma mitochondrial OS=Rattus norvegicus OX=10116 GN=Atp5f1c PE=1 SV=2
74	64	tr|Q6QI09|Q6QI09_RAT	83.6	5	5	453290	4	4	6		67721	ATP synthase subunit gamma mitochondrial OS=Rattus norvegicus OX=10116 GN=Taf3 PE=1 SV=1
62	21	Q64428|ECHA_RAT	82.88	6	6	906210	6	6	8		82665	Trifunctional enzyme subunit alpha mitochondrial OS=Rattus norvegicus OX=10116 GN=Hadha PE=1 SV=2
58	384	tr|Q06Q97|Q06Q97_RAT	81.46	8	8	970430	4	4	10		38485	NADH-ubiquinone oxidoreductase chain 2 OS=Rattus norvegicus OX=10116 GN=ND2 PE=3 SV=1
58	386	tr|Q5UAJ8|Q5UAJ8_RAT	81.46	8	8	970430	4	4	10		38455	NADH-ubiquinone oxidoreductase chain 2 OS=Rattus norvegicus OX=10116 GN=ND2 PE=3 SV=1
58	388	tr|Q8HID0|Q8HID0_RAT	81.46	8	8	970430	4	4	10		38653	NADH-ubiquinone oxidoreductase chain 2 OS=Rattus norvegicus OX=10116 GN=Mt-nd2 PE=3 SV=1
58	389	P11662|NU2M_RAT	81.46	8	8	970430	4	4	10		38653	NADH-ubiquinone oxidoreductase chain 2 OS=Rattus norvegicus OX=10116 GN=Mtnd2 PE=3 SV=3
58	390	tr|Q06QH5|Q06QH5_RAT	81.46	8	8	970430	4	4	10		38626	NADH-ubiquinone oxidoreductase chain 2 OS=Rattus norvegicus OX=10116 GN=ND2 PE=3 SV=1
58	391	tr|Q8SEZ7|Q8SEZ7_RAT	81.46	8	8	970430	4	4	10		38580	NADH-ubiquinone oxidoreductase chain 2 (Fragment) OS=Rattus norvegicus OX=10116 GN=NADH2 PE=3 SV=1
58	392	tr|Q06QB0|Q06QB0_RAT	81.46	8	8	970430	4	4	10		38534	NADH-ubiquinone oxidoreductase chain 2 OS=Rattus norvegicus OX=10116 GN=ND2 PE=3 SV=1
58	393	tr|D2E6P4|D2E6P4_RAT	81.46	8	8	970430	4	4	10		38623	NADH-ubiquinone oxidoreductase chain 2 OS=Rattus norvegicus OX=10116 GN=ND2 PE=3 SV=1
58	394	tr|Q06QE9|Q06QE9_RAT	81.46	8	8	970430	4	4	10		38598	NADH-ubiquinone oxidoreductase chain 2 OS=Rattus norvegicus OX=10116 GN=ND2 PE=3 SV=1
58	385	tr|A0A0A1G491|A0A0A1G491_RAT	81.46	8	8	970430	4	4	10		38542	NADH-ubiquinone oxidoreductase chain 2 OS=Rattus norvegicus OX=10116 GN=ND2 PE=3 SV=1
59	363	P05508|NU4M_RAT	80.63	12	12	1179900	8	8	10	Oxidation (M)
59	364	tr|D2E6K0|D2E6K0_RAT	80.63	12	12	1179900	8	8	10	Oxidation (M)
59	365	tr|A7XYB9|A7XYB9_RAT	80.63	12	12	1179900	8	8	10	Oxidation (M)
59	366	tr|Q06QE1|Q06QE1_RAT	80.63	12	12	1179900	8	8	10	Oxidation (M)
59	367	tr|Q06QA2|Q06QA2_RAT	80.63	12	12	1179900	8	8	10	Oxidation (M)
59	368	tr|Q7HKW3|Q7HKW3_RAT	80.63	12	12	1179900	8	8	10	Oxidation (M)
59	369	tr|Q06QG7|Q06QG7_RAT	80.63	12	12	1179900	8	8	10	Oxidation (M)
59	370	tr|Q06Q89|Q06Q89_RAT	80.63	12	12	1179900	8	8	10	Oxidation (M)
59	371	tr|Q35737|Q35737_RAT	80.63	12	12	1179900	8	8	10	Oxidation (M)
59	372	tr|Q8HIC6|Q8HIC6_RAT	80.63	12	12	1179900	8	8	10	Oxidation (M)
51	376	tr|Q5RJN0|Q5RJN0_RAT	76.98	17	17	3337000	4	4	13	Oxidation (M)	23945	NADH dehydrogenase (Ubiquinone) Fe-S protein 7 OS=Rattus norvegicus OX=10116 GN=Ndufs7 PE=1 SV=1
41	208	Q7TQ16|QCR8_RAT	73.67	30	30	4269800	6	6	19		9849	Cytochrome b-c1 complex subunit 8 OS=Rattus norvegicus OX=10116 GN=Uqcrq PE=3 SV=1
76	267	tr|I6V4L9|I6V4L9_RAT	73.39	7	7	166610	3	3	5		29844	Cytochrome c oxidase subunit 3 OS=Rattus norvegicus OX=10116 GN=COX3 PE=3 SV=1
76	266	tr|Q7H115|Q7H115_RAT	73.39	7	7	166610	3	3	5		29871	Cytochrome c oxidase subunit 3 OS=Rattus norvegicus OX=10116 GN=Mt-co3 PE=3 SV=1
76	268	tr|Q8M7G4|Q8M7G4_RAT	73.39	7	7	166610	3	3	5		29861	Cytochrome c oxidase subunit 3 OS=Rattus norvegicus OX=10116 PE=2 SV=1
76	269	tr|A0A096XKT2|A0A096XKT2_RAT	73.39	7	7	166610	3	3	5		29901	Cytochrome c oxidase subunit 3 OS=Rattus norvegicus OX=10116 GN=COX3 PE=3 SV=1
76	270	P05505|COX3_RAT	73.39	7	7	166610	3	3	5		29871	Cytochrome c oxidase subunit 3 OS=Rattus norvegicus OX=10116 GN=Mtco3 PE=1 SV=5
76	271	tr|Q8SEZ2|Q8SEZ2_RAT	73.39	7	7	166610	3	3	5		29870	Cytochrome c oxidase subunit 3 (Fragment) OS=Rattus norvegicus OX=10116 GN=COIII PE=3 SV=1
47	3918	tr|D3ZLT1|D3ZLT1_RAT	70.05	16	16	4227800	3	3	15	Oxidation (M)	16568	NADH dehydrogenase (Ubiquinone) 1 beta subcomplex 7 (Predicted) OS=Rattus norvegicus OX=10116 GN=Ndufb7 PE=1 SV=1
60	151	P12075|COX5B_RAT	69.1	11	11	7550000	6	6	10		13915	Cytochrome c oxidase subunit 5B mitochondrial OS=Rattus norvegicus OX=10116 GN=Cox5b PE=1 SV=2
67	1021	tr|Q06QA9|Q06QA9_RAT	67.34	5	5	621320	4	3	7		56893	Cytochrome c oxidase subunit 1 OS=Rattus norvegicus OX=10116 GN=CO1 PE=3 SV=1
67	1022	tr|Q06QK0|Q06QK0_RAT	67.34	5	5	621320	4	3	7		56880	Cytochrome c oxidase subunit 1 OS=Rattus norvegicus OX=10116 GN=CO1 PE=3 SV=1
67	1023	tr|Q8SEZ6|Q8SEZ6_RAT	67.34	5	5	621320	4	3	7		56879	Cytochrome c oxidase subunit 1 OS=Rattus norvegicus OX=10116 GN=COI PE=3 SV=1
67	1024	tr|A0A0A1FZ34|A0A0A1FZ34_RAT	67.34	5	5	621320	4	3	7		56937	Cytochrome c oxidase subunit 1 OS=Rattus norvegicus OX=10116 GN=COX1 PE=3 SV=1
67	1025	tr|Q8HIC9|Q8HIC9_RAT	67.34	5	5	621320	4	3	7		56845	Cytochrome c oxidase subunit 1 OS=Rattus norvegicus OX=10116 GN=Mt-co1 PE=3 SV=1
67	1026	P05503|COX1_RAT	67.34	5	5	621320	4	3	7		56845	Cytochrome c oxidase subunit 1 OS=Rattus norvegicus OX=10116 GN=Mtco1 PE=2 SV=3
67	1027	tr|Q95938|Q95938_RAT	67.34	5	5	621320	4	3	7		56977	Cytochrome c oxidase subunit 1 OS=Rattus norvegicus OX=10116 GN=Co I PE=3 SV=1
69	292	P10888|COX41_RAT	64.61	18	18	805070	4	4	7	Oxidation (M)	19515	Cytochrome c oxidase subunit 4 isoform 1 mitochondrial OS=Rattus norvegicus OX=10116 GN=Cox4i1 PE=1 SV=1
81	233	tr|Q5UAJ5|Q5UAJ5_RAT	62.86	16	16	714100	2	2	4		7642	ATP synthase protein 8 OS=Rattus norvegicus OX=10116 GN=ATP8 PE=3 SV=1
81	234	P11608|ATP8_RAT	62.86	16	16	714100	2	2	4		7630	ATP synthase protein 8 OS=Rattus norvegicus OX=10116 GN=Mt-atp8 PE=1 SV=2
81	235	tr|Q8SEZ4|Q8SEZ4_RAT	62.86	16	16	714100	2	2	4		7632	ATP synthase protein 8 OS=Rattus norvegicus OX=10116 GN=ATPase8 PE=3 SV=1
81	236	tr|Q8HIC8|Q8HIC8_RAT	62.86	16	16	714100	2	2	4		7630	ATP synthase protein 8 OS=Rattus norvegicus OX=10116 GN=Mt-atp8 PE=3 SV=1
80	3911	tr|B2RYW3|B2RYW3_RAT	61.6	11	11	657420	2	2	4	Oxidation (M)	21892	NADH dehydrogenase (Ubiquinone) 1 beta subcomplex 9 OS=Rattus norvegicus OX=10116 GN=Ndufb9 PE=1 SV=1
64	398	tr|B2RYT5|B2RYT5_RAT	61.2	30	30	1453600	4	4	8	Oxidation (M)	12651	Cox7a2l protein OS=Rattus norvegicus OX=10116 GN=Cox7a2l PE=2 SV=1
64	399	tr|D3ZYX8|D3ZYX8_RAT	61.2	28	28	1453600	4	4	8	Oxidation (M)	13274	Cytochrome c oxidase subunit 7A2-like OS=Rattus norvegicus OX=10116 GN=Cox7a2l PE=1 SV=1
78	3914	tr|B2RYU0|B2RYU0_RAT	57.92	21	21	1418300	3	3	4		11842	NADH dehydrogenase (Ubiquinone) 1 beta subcomplex 2 (Predicted) isoform CRA_b OS=Rattus norvegicus OX=10116 GN=Ndufb2 PE=1 SV=1
73	467	tr|D4A4P3|D4A4P3_RAT	54.71	22	22	1834400	3	3	6	Oxidation (M)	11267	NADH:ubiquinone oxidoreductase subunit B3 OS=Rattus norvegicus OX=10116 GN=Ndufb3 PE=1 SV=1
72	209	tr|B2RZD6|B2RZD6_RAT	54.33	20	20	871470	3	3	7		9327	NDUFA4 mitochondrial complex-associated OS=Rattus norvegicus OX=10116 GN=Ndufa4 PE=1 SV=1
88	3909	tr|G3V644|G3V644_RAT	52	4	4	392660	2	2	3		49300	NADH dehydrogenase (Ubiquinone) flavoprotein 3-like isoform CRA_a OS=Rattus norvegicus OX=10116 GN=Ndufv3 PE=1 SV=1
88	3910	tr|O54755|O54755_RAT	52	4	4	392660	2	2	3		49312	MIPP65 OS=Rattus norvegicus OX=10116 GN=Ndufv3 PE=2 SV=1
129	30	tr|Q5BJZ3|Q5BJZ3_RAT	49.53	1	1	98603	1	1	1		113869	Nicotinamide nucleotide transhydrogenase OS=Rattus norvegicus OX=10116 GN=Nnt PE=1 SV=1
87	159	tr|Q5U1W6|Q5U1W6_RAT	48.74	9	9	339230	3	3	3		28238	MICOS complex subunit OS=Rattus norvegicus OX=10116 GN=Apool PE=1 SV=1
89	18	P26284|ODPA_RAT	48.39	5	5	296950	3	3	3		43227	Pyruvate dehydrogenase E1 component subunit alpha somatic form mitochondrial OS=Rattus norvegicus OX=10116 GN=Pdha1 PE=1 SV=2
147	76	Q06647|ATPO_RAT	45.73	4	4	363670	1	1	1		23398	ATP synthase subunit O mitochondrial OS=Rattus norvegicus OX=10116 GN=Atp5po PE=1 SV=1
107	3936	tr|A0A0G2K8Q8|A0A0G2K8Q8_RAT	42.62	13	13	153910	2	2	2		7099	Ubiquinol-cytochrome c reductase complex III subunit X OS=Rattus norvegicus OX=10116 GN=Uqcr10 PE=1 SV=1
107	3937	tr|B2RYX1|B2RYX1_RAT	42.62	12	12	153910	2	2	2		7462	LOC685322 protein OS=Rattus norvegicus OX=10116 GN=Uqcr10 PE=2 SV=1
109	3915	tr|Q8SEZ1|Q8SEZ1_RAT	42.05	20	20	104260	2	2	2		13087	NADH-ubiquinone oxidoreductase chain 3 OS=Rattus norvegicus OX=10116 GN=Mt-nd3 PE=2 SV=1
109	3916	P05506|NU3M_RAT	42.05	20	20	104260	2	2	2		13087	NADH-ubiquinone oxidoreductase chain 3 OS=Rattus norvegicus OX=10116 GN=Mtnd3 PE=3 SV=3
137	31	P45953|ACADV_RAT	40.59	2	2	137490	1	1	1		70749	Very long-chain specific acyl-CoA dehydrogenase mitochondrial OS=Rattus norvegicus OX=10116 GN=Acadvl PE=1 SV=1
137	32	tr|Q5M9H2|Q5M9H2_RAT	40.59	2	2	137490	1	1	1		70821	Acyl-Coenzyme A dehydrogenase very long chain OS=Rattus norvegicus OX=10116 GN=Acadvl PE=1 SV=1
79	43	tr|D3ZB81|D3ZB81_RAT	39.45	6	6	298600	3	3	4		35227	Solute carrier family 25 member 31 OS=Rattus norvegicus OX=10116 GN=Slc25a31 PE=3 SV=3
79	23	tr|Q6P9Y4|Q6P9Y4_RAT	39.45	6	6	298600	3	3	4		32904	ADP/ATP translocase 1 OS=Rattus norvegicus OX=10116 GN=Slc25a4 PE=1 SV=1
79	24	Q05962|ADT1_RAT	39.45	6	6	298600	3	3	4		32989	ADP/ATP translocase 1 OS=Rattus norvegicus OX=10116 GN=Slc25a4 PE=1 SV=3
79	27	Q09073|ADT2_RAT	39.45	6	6	298600	3	3	4		32901	ADP/ATP translocase 2 OS=Rattus norvegicus OX=10116 GN=Slc25a5 PE=1 SV=3
84	73	Q63362|NDUA5_RAT	39.17	14	14	550140	2	1	4		13412	NADH dehydrogenase [ubiquinone] 1 alpha subcomplex subunit 5 OS=Rattus norvegicus OX=10116 GN=Ndufa5 PE=1 SV=3
148	48	Q4V8F9|HSDL2_RAT	37.54	2	2	393300	1	1	1		58344	Hydroxysteroid dehydrogenase-like protein 2 OS=Rattus norvegicus OX=10116 GN=Hsdl2 PE=2 SV=1
111	3932	tr|D3ZD09|D3ZD09_RAT	36.05	12	12	156690	1	1	2		10071	Cytochrome c oxidase subunit OS=Rattus norvegicus OX=10116 GN=Cox6b1 PE=1 SV=1
110	321	tr|D4AE90|D4AE90_RAT	35.5	3	3	0	2	1	2	Formylation	50113	RCC1-like OS=Rattus norvegicus OX=10116 GN=Rcc1l PE=1 SV=1
95	410	tr|F1LNF0|F1LNF0_RAT	34.93	1	1	556870	2	2	2		228912	Myosin heavy chain 14 OS=Rattus norvegicus OX=10116 GN=Myh14 PE=1 SV=1
169	3934	Q66H47|RM24_RAT	34.9	6	6	125150	1	1	1		25001	39S ribosomal protein L24 mitochondrial OS=Rattus norvegicus OX=10116 GN=Mrpl24 PE=2 SV=1
112	143	tr|A0A0G2JVQ1|A0A0G2JVQ1_RAT	34.42	2	2	51303	1	1	2		47273	Creatine kinase S-type mitochondrial OS=Rattus norvegicus OX=10116 GN=Ckmt2 PE=1 SV=1
112	46	P09605|KCRS_RAT	34.42	2	2	51303	1	1	2		47385	Creatine kinase S-type mitochondrial OS=Rattus norvegicus OX=10116 GN=Ckmt2 PE=1 SV=2
101	75	Q6PDU7|ATP5L_RAT	33.7	16	16	291920	1	1	2		11433	ATP synthase subunit g mitochondrial OS=Rattus norvegicus OX=10116 GN=Atp5mg PE=1 SV=2
105	13	P49432|ODPB_RAT	30.79	5	5	113880	2	2	2		38982	Pyruvate dehydrogenase E1 component subunit beta mitochondrial OS=Rattus norvegicus OX=10116 GN=Pdhb PE=1 SV=2
105	15	tr|A0A0G2KAM3|A0A0G2KAM3_RAT	30.79	4	4	113880	2	2	2		46193	Pyruvate dehydrogenase E1 component subunit beta OS=Rattus norvegicus OX=10116 GN=Pdhb PE=1 SV=1
138	3923	P80431|COX7B_RAT	30.26	9	9	157030	1	1	1		8995	Cytochrome c oxidase subunit 7B mitochondrial OS=Rattus norvegicus OX=10116 GN=Cox7b PE=1 SV=3
106	3919	tr|A9UMV7|A9UMV7_RAT	29.03	11	11	280450	1	1	2		6539	RCG29512 OS=Rattus norvegicus OX=10116 GN=Uqcr11 PE=1 SV=1
118	3958	tr|D3ZD73|D3ZD73_RAT	28.78	2	2		2	0	2		54245	DEAD-box helicase 6 OS=Rattus norvegicus OX=10116 GN=Ddx6 PE=1 SV=1
113	813	Q68FU4|SUCHY_RAT	28.27	2	2		2	0	2		47549	Succinate--hydroxymethylglutarate CoA-transferase OS=Rattus norvegicus OX=10116 GN=Sugct PE=2 SV=1
83	482	tr|D3ZRJ7|D3ZRJ7_RAT	28.04	1	1	106850	2	1	4		225446	Leucine-rich repeat kinase 1 OS=Rattus norvegicus OX=10116 GN=Lrrk1 PE=4 SV=2
170	79	tr|D3ZUX5|D3ZUX5_RAT	27.82	4	4	98736	1	1	1		26435	MICOS complex subunit OS=Rattus norvegicus OX=10116 GN=Chchd3 PE=1 SV=1
90	3917	tr|D3ZJG4|D3ZJG4_RAT	27.81	1	1	267350	1	1	3	Oxidation (M)	95972	Phosphofurin acidic cluster sorting protein 2 OS=Rattus norvegicus OX=10116 GN=Pacs2 PE=1 SV=2
92	256	tr|Q8M7G5|Q8M7G5_RAT	27.65	9	9	1550500	2	2	3	Oxidation (M)	24240	ATP synthase subunit a (Fragment) OS=Rattus norvegicus OX=10116 PE=2 SV=1
92	258	P05504|ATP6_RAT	27.65	9	9	1550500	2	2	3	Oxidation (M)	25076	ATP synthase subunit a OS=Rattus norvegicus OX=10116 GN=Mt-atp6 PE=1 SV=3
92	259	tr|Q8HIC7|Q8HIC7_RAT	27.65	9	9	1550500	2	2	3	Oxidation (M)	25076	ATP synthase subunit a OS=Rattus norvegicus OX=10116 GN=Mt-atp6 PE=4 SV=1
92	260	tr|S5S1E9|S5S1E9_RAT	27.65	9	9	1550500	2	2	3	Oxidation (M)	25049	ATP synthase subunit a OS=Rattus norvegicus OX=10116 GN=ATP6 PE=4 SV=1
92	261	tr|Q06QE5|Q06QE5_RAT	27.65	9	9	1550500	2	2	3	Oxidation (M)	25075	ATP synthase subunit a OS=Rattus norvegicus OX=10116 GN=ATP6 PE=4 SV=1
92	262	tr|Q8SEZ3|Q8SEZ3_RAT	27.65	9	9	1550500	2	2	3	Oxidation (M)	25030	ATP synthase subunit a OS=Rattus norvegicus OX=10116 GN=ATPase6 PE=4 SV=1
86	224	P11530|DMD_RAT	27.34	0	0	424360	2	2	3		425830	Dystrophin OS=Rattus norvegicus OX=10116 GN=Dmd PE=1 SV=2
82	1034	P05696|KPCA_RAT	25.58	1	1	812770	1	1	4		76792	Protein kinase C alpha type OS=Rattus norvegicus OX=10116 GN=Prkca PE=1 SV=3
98	497	tr|A0A0G2JYD4|A0A0G2JYD4_RAT	25.13	0	0	0	2	1	2		487857	Vacuolar protein sorting 13 homolog D OS=Rattus norvegicus OX=10116 GN=Vps13d PE=1 SV=1
98	498	tr|D3ZKC6|D3ZKC6_RAT	25.13	0	0	0	2	1	2		488962	Vacuolar protein sorting 13 homolog D OS=Rattus norvegicus OX=10116 GN=Vps13d PE=1 SV=1
99	298	tr|Q5RKL4|Q5RKL4_RAT	23.9	1	1	0	1	1	2		95977	Dimethylglycine dehydrogenase OS=Rattus norvegicus OX=10116 GN=Dmgdh PE=1 SV=1
99	299	Q63342|M2GD_RAT	23.9	1	1	0	1	1	2		96047	Dimethylglycine dehydrogenase mitochondrial OS=Rattus norvegicus OX=10116 GN=Dmgdh PE=1 SV=1
99	303	tr|A0A0G2K9Y2|A0A0G2K9Y2_RAT	23.9	1	1	0	1	1	2		98864	Dimethylglycine dehydrogenase mitochondrial OS=Rattus norvegicus OX=10116 GN=Dmgdh PE=1 SV=1
115	3943	tr|D4A6D9|D4A6D9_RAT	23.7	3	3	323590	1	1	2		43431	HCLS1-binding protein 3 OS=Rattus norvegicus OX=10116 GN=Hs1bp3 PE=1 SV=1
173	332	tr|F1LNJ1|F1LNJ1_RAT	21.14	0	0	1300200	1	1	1		284829	Leucine-rich repeat kinase 2 OS=Rattus norvegicus OX=10116 GN=Lrrk2 PE=1 SV=3
116	524	tr|D4A054|D4A054_RAT	21.14	0	0	514880	1	1	2		341403	RAN-binding protein 2 OS=Rattus norvegicus OX=10116 GN=Ranbp2 PE=1 SV=2
116	525	tr|M0R3M4|M0R3M4_RAT	21.14	0	0	514880	1	1	2		344396	RAN-binding protein 2 OS=Rattus norvegicus OX=10116 GN=Ranbp2 PE=1 SV=1
174	3951	tr|B1WBP7|B1WBP7_RAT	20.71	7	7	38325	1	1	1		12884	ATP synthase subunit delta mitochondrial OS=Rattus norvegicus OX=10116 GN=Atp5f1d PE=1 SV=1
174	3952	P35434|ATPD_RAT	20.71	5	5	38325	1	1	1		17595	ATP synthase subunit delta mitochondrial OS=Rattus norvegicus OX=10116 GN=Atp5f1d PE=1 SV=2
174	3953	tr|G3V7Y3|G3V7Y3_RAT	20.71	5	5	38325	1	1	1		17563	ATP synthase subunit delta mitochondrial OS=Rattus norvegicus OX=10116 GN=Atp5f1d PE=1 SV=1
108	204	Q499N5|ACSF2_RAT	20.6	1	1	144430	1	1	2	Formylation	67887	Medium-chain acyl-CoA ligase ACSF2 mitochondrial OS=Rattus norvegicus OX=10116 GN=Acsf2 PE=2 SV=1
93	3954	P50554|GABT_RAT	20.6	3	3	1763300	1	1	3		56456	4-aminobutyrate aminotransferase mitochondrial OS=Rattus norvegicus OX=10116 GN=Abat PE=1 SV=3

## Sheet: RHM PTP I-III(2)-IV(L)
Protein Group	Protein ID	Accession	-10lgP	Coverage (%)	Coverage (%) Sample 3	IBAQ	#Peptides	#Unique	#Spec Sample 3	PTM	Avg. Mass	Description
8	5	P10719|ATPB_RAT	311.76	22	22	80961000	37	37	105	Oxidation (M)
8	6	tr|G3V6D3|G3V6D3_RAT	311.76	22	22	80961000	37	37	105	Oxidation (M)
7	59	tr|D3ZFQ8|D3ZFQ8_RAT	303.3	35	35	161390000	30	30	118	Oxidation (M)
5	58	P20788|UCRI_RAT	297.05	32	32	118570000	36	35	132		29446	Cytochrome b-c1 complex subunit Rieske mitochondrial OS=Rattus norvegicus OX=10116 GN=Uqcrfs1 PE=1 SV=2
1	20	Q66HF1|NDUS1_RAT	295.51	31	31	109790000	79	78	206	Carbamidomethylation
15	212	tr|B2RYS8|B2RYS8_RAT	293.12	53	53	51792000	27	27	91	Oxidation (M)	21959	NADH dehydrogenase [ubiquinone] 1 beta subcomplex subunit 8 mitochondrial OS=Rattus norvegicus OX=10116 GN=Ndufb8 PE=1 SV=1
4	26	Q641Y2|NDUS2_RAT	292.16	35	35	119810000	47	46	151	Carbamidomethylation
2	37	P19234|NDUV2_RAT	284.02	46	46	277590000	46	46	177		27378	NADH dehydrogenase [ubiquinone] flavoprotein 2 mitochondrial OS=Rattus norvegicus OX=10116 GN=Ndufv2 PE=1 SV=2
19	60	tr|D4A565|D4A565_RAT	283.01	41	41	33782000	28	27	73		21664	NADH dehydrogenase (Ubiquinone) 1 beta subcomplex 5 (Predicted) isoform CRA_b OS=Rattus norvegicus OX=10116 GN=Ndufb5 PE=1 SV=1
17	161	tr|A0A0G2JVL6|A0A0G2JVL6_RAT	255.82	42	42	124270000	31	31	86	Carbamidomethylation	19965	NADH dehydrogenase [ubiquinone] 1 alpha subcomplex subunit 8 OS=Rattus norvegicus OX=10116 GN=Ndufa8 PE=1 SV=1
13	89	tr|L0L4L8|L0L4L8_RAT	251.9	19	19		28	0	92		42470	Cytochrome b (Fragment) OS=Rattus norvegicus OX=10116 GN=cytb PE=3 SV=1
13	91	tr|A0A140GE10|A0A140GE10_RAT	251.9	19	19		28	0	92		42574	Cytochrome b (Fragment) OS=Rattus norvegicus OX=10116 PE=3 SV=1
13	92	tr|A0A140GE11|A0A140GE11_RAT	251.9	19	19		28	0	92		42588	Cytochrome b (Fragment) OS=Rattus norvegicus OX=10116 PE=3 SV=1
13	95	tr|A0A385HCC9|A0A385HCC9_RAT	251.9	19	19		28	0	92		42766	Cytochrome b (Fragment) OS=Rattus norvegicus OX=10116 PE=3 SV=1
13	96	tr|A0A3Q8AGE8|A0A3Q8AGE8_RAT	251.9	19	19		28	0	92		42712	Cytochrome b (Fragment) OS=Rattus norvegicus OX=10116 GN=Cytb PE=3 SV=1
13	97	tr|A0A3Q8AC68|A0A3Q8AC68_RAT	251.9	19	19		28	0	92		42622	Cytochrome b (Fragment) OS=Rattus norvegicus OX=10116 GN=Cytb PE=3 SV=1
13	98	tr|A0A3S6FK13|A0A3S6FK13_RAT	251.9	19	19		28	0	92		42702	Cytochrome b (Fragment) OS=Rattus norvegicus OX=10116 GN=Cytb PE=3 SV=1
13	100	tr|A0A3S6FM15|A0A3S6FM15_RAT	251.9	19	19		28	0	92		42698	Cytochrome b (Fragment) OS=Rattus norvegicus OX=10116 GN=Cytb PE=3 SV=1
13	102	tr|A0A220D9Z6|A0A220D9Z6_RAT	251.9	19	19		28	0	92		43018	Cytochrome b OS=Rattus norvegicus OX=10116 PE=3 SV=1
13	103	tr|D6NSP2|D6NSP2_RAT	251.9	19	19		28	0	92		42945	Cytochrome b (Fragment) OS=Rattus norvegicus OX=10116 GN=cytb PE=3 SV=1
13	104	tr|D6NSS6|D6NSS6_RAT	251.9	19	19		28	0	92		42993	Cytochrome b (Fragment) OS=Rattus norvegicus OX=10116 GN=cytb PE=3 SV=1
13	106	tr|D6NSQ3|D6NSQ3_RAT	251.9	19	19		28	0	92		43012	Cytochrome b (Fragment) OS=Rattus norvegicus OX=10116 GN=cytb PE=3 SV=1
13	107	tr|D6NSR3|D6NSR3_RAT	251.9	19	19		28	0	92		42986	Cytochrome b (Fragment) OS=Rattus norvegicus OX=10116 GN=cytb PE=3 SV=1
13	109	tr|D6NSQ8|D6NSQ8_RAT	251.9	19	19		28	0	92		43016	Cytochrome b (Fragment) OS=Rattus norvegicus OX=10116 GN=cytb PE=3 SV=1
13	110	tr|D6NSR8|D6NSR8_RAT	251.9	19	19		28	0	92		42998	Cytochrome b (Fragment) OS=Rattus norvegicus OX=10116 GN=cytb PE=3 SV=1
13	112	tr|F2Q6S6|F2Q6S6_RAT	251.9	19	19		28	0	92		42938	Cytochrome b (Fragment) OS=Rattus norvegicus OX=10116 GN=cytb PE=3 SV=1
13	113	tr|A0A0A1FZ42|A0A0A1FZ42_RAT	251.9	19	19		28	0	92		42989	Cytochrome b OS=Rattus norvegicus OX=10116 GN=CYTB PE=3 SV=1
13	114	tr|D6NSS7|D6NSS7_RAT	251.9	19	19		28	0	92		42948	Cytochrome b (Fragment) OS=Rattus norvegicus OX=10116 GN=cytb PE=3 SV=1
13	115	tr|Q8SEY9|Q8SEY9_RAT	251.9	19	19		28	0	92		43015	Cytochrome b OS=Rattus norvegicus OX=10116 GN=cytb PE=3 SV=1
13	116	tr|D6NSR7|D6NSR7_RAT	251.9	19	19		28	0	92		42982	Cytochrome b (Fragment) OS=Rattus norvegicus OX=10116 GN=cytb PE=3 SV=1
13	117	tr|A0A220DA44|A0A220DA44_RAT	251.9	19	19		28	0	92		42968	Cytochrome b OS=Rattus norvegicus OX=10116 PE=3 SV=1
13	119	tr|D6NSQ6|D6NSQ6_RAT	251.9	19	19		28	0	92		42952	Cytochrome b (Fragment) OS=Rattus norvegicus OX=10116 GN=cytb PE=3 SV=1
13	120	tr|D6NSQ0|D6NSQ0_RAT	251.9	19	19		28	0	92		42968	Cytochrome b (Fragment) OS=Rattus norvegicus OX=10116 GN=cytb PE=3 SV=1
13	121	tr|Q5UAI7|Q5UAI7_RAT	251.9	19	19		28	0	92		42998	Cytochrome b OS=Rattus norvegicus OX=10116 GN=CYTB PE=3 SV=1
13	122	tr|D6NSR2|D6NSR2_RAT	251.9	19	19		28	0	92		43073	Cytochrome b (Fragment) OS=Rattus norvegicus OX=10116 GN=cytb PE=3 SV=1
13	123	tr|A0A0S1Z1V9|A0A0S1Z1V9_RAT	251.9	19	19		28	0	92		43002	Cytochrome b OS=Rattus norvegicus OX=10116 GN=CYTB PE=3 SV=1
13	125	tr|Q8HIC4|Q8HIC4_RAT	251.9	19	19		28	0	92		43012	Cytochrome b OS=Rattus norvegicus OX=10116 GN=Mt-cyb PE=3 SV=1
13	126	tr|A0A220DA02|A0A220DA02_RAT	251.9	19	19		28	0	92		42968	Cytochrome b OS=Rattus norvegicus OX=10116 PE=3 SV=1
13	128	tr|A0A0S1Z1V4|A0A0S1Z1V4_RAT	251.9	19	19		28	0	92		43016	Cytochrome b OS=Rattus norvegicus OX=10116 GN=CYTB PE=3 SV=1
13	129	tr|R9TKN1|R9TKN1_RAT	251.9	19	19		28	0	92		43012	Cytochrome b OS=Rattus norvegicus OX=10116 GN=CYTB PE=3 SV=1
13	130	P00159|CYB_RAT	251.9	19	19		28	0	92		43012	Cytochrome b OS=Rattus norvegicus OX=10116 GN=Mt-Cyb PE=3 SV=3
13	131	tr|L0N311|L0N311_RAT	251.9	19	19		28	0	92		43045	Cytochrome b (Fragment) OS=Rattus norvegicus OX=10116 GN=cytb PE=3 SV=1
13	132	tr|A0A220DA28|A0A220DA28_RAT	251.9	19	19		28	0	92		42970	Cytochrome b OS=Rattus norvegicus OX=10116 PE=3 SV=1
13	133	tr|H2KXA0|H2KXA0_RAT	251.9	19	19		28	0	92		42978	Cytochrome b (Fragment) OS=Rattus norvegicus OX=10116 GN=cytb PE=3 SV=1
13	134	tr|A0A096XNM4|A0A096XNM4_RAT	251.9	19	19		28	0	92		43042	Cytochrome b (Fragment) OS=Rattus norvegicus OX=10116 PE=3 SV=1
13	135	tr|D6NSP5|D6NSP5_RAT	251.9	19	19		28	0	92		43012	Cytochrome b (Fragment) OS=Rattus norvegicus OX=10116 GN=cytb PE=3 SV=1
13	86	tr|A0A411P2L0|A0A411P2L0_RAT	251.9	20	20		28	0	92		41017	Cytochrome b (Fragment) OS=Rattus norvegicus OX=10116 GN=Cytb PE=3 SV=1
13	88	tr|A0A411P2K0|A0A411P2K0_RAT	251.9	20	20		28	0	92		42238	Cytochrome b (Fragment) OS=Rattus norvegicus OX=10116 GN=Cytb PE=3 SV=1
13	108	tr|D6NSP4|D6NSP4_RAT	251.9	19	19		28	0	92		43016	Cytochrome b (Fragment) OS=Rattus norvegicus OX=10116 GN=cytb PE=3 SV=1
13	124	tr|D6NSR1|D6NSR1_RAT	251.9	19	19		28	0	92		43002	Cytochrome b (Fragment) OS=Rattus norvegicus OX=10116 GN=cytb PE=3 SV=1
14	101	tr|A0A097PE40|A0A097PE40_RAT	251.81	19	19	291670	28	1	92		42865	Cytochrome b OS=Rattus norvegicus OX=10116 GN=CYTB PE=3 SV=1
6	25	Q68FY0|QCR1_RAT	250	27	27	59654000	44	43	129	Carbamidomethylation	52849	Cytochrome b-c1 complex subunit 1 mitochondrial OS=Rattus norvegicus OX=10116 GN=Uqcrc1 PE=1 SV=1
16	99	tr|A0A385HC93|A0A385HC93_RAT	248.84	20	20	1106800	29	2	91		42751	Cytochrome b (Fragment) OS=Rattus norvegicus OX=10116 PE=3 SV=1
32	248	tr|A9UMW2|A9UMW2_RAT	243.75	37	37	34396000	12	12	39	Oxidation (M)
32	249	tr|M0RB63|M0RB63_RAT	243.75	37	37	34396000	12	12	39	Oxidation (M)
32	250	tr|A0A0G2KAA3|A0A0G2KAA3_RAT	243.75	34	34	34396000	12	12	39	Oxidation (M)
10	77	tr|Q5PQZ9|Q5PQZ9_RAT	228.73	48	48	67114000	25	25	92		14359	NADH dehydrogenase [ubiquinone] 1 subunit C2 OS=Rattus norvegicus OX=10116 GN=Ndufc2 PE=1 SV=1
22	137	tr|Q06QK5|Q06QK5_RAT	219.83	15	15	33422000	25	25	67	Oxidation (M)	68606	NADH-ubiquinone oxidoreductase chain 5 OS=Rattus norvegicus OX=10116 GN=ND5 PE=3 SV=1
22	138	P11661|NU5M_RAT	219.83	15	15	33422000	25	25	67	Oxidation (M)	68618	NADH-ubiquinone oxidoreductase chain 5 OS=Rattus norvegicus OX=10116 GN=Mtnd5 PE=3 SV=3
22	139	tr|Q06QG6|Q06QG6_RAT	219.83	15	15	33422000	25	25	67	Oxidation (M)	68588	NADH-ubiquinone oxidoreductase chain 5 OS=Rattus norvegicus OX=10116 GN=ND5 PE=3 SV=1
22	140	tr|Q06QA1|Q06QA1_RAT	219.83	15	15	33422000	25	25	67	Oxidation (M)	68574	NADH-ubiquinone oxidoreductase chain 5 OS=Rattus norvegicus OX=10116 GN=ND5 PE=3 SV=1
22	141	tr|Q8SEZ0|Q8SEZ0_RAT	219.83	15	15	33422000	25	25	67	Oxidation (M)	68618	NADH-ubiquinone oxidoreductase chain 5 OS=Rattus norvegicus OX=10116 GN=Mt-nd5 PE=3 SV=1
22	142	tr|A0A096XKT9|A0A096XKT9_RAT	219.83	15	15	33422000	25	25	67	Oxidation (M)	68584	NADH-ubiquinone oxidoreductase chain 5 OS=Rattus norvegicus OX=10116 GN=ND5 PE=3 SV=1
3	50	P32551|QCR2_RAT	219.65	25	25	186140000	40	40	170	Oxidation (M)	48396	Cytochrome b-c1 complex subunit 2 mitochondrial OS=Rattus norvegicus OX=10116 GN=Uqcrc2 PE=1 SV=2
12	49	Q5BK63|NDUA9_RAT	215.14	34	34	27957000	30	30	92		42559	NADH dehydrogenase [ubiquinone] 1 alpha subcomplex subunit 9 mitochondrial OS=Rattus norvegicus OX=10116 GN=Ndufa9 PE=1 SV=2
25	160	tr|D4A7L4|D4A7L4_RAT	214.5	26	26	45929000	14	14	54		17634	NADH dehydrogenase (Ubiquinone) 1 beta subcomplex 11 (Predicted) OS=Rattus norvegicus OX=10116 GN=Ndufb11 PE=1 SV=1
11	171	Q561S0|NDUAA_RAT	214.48	35	35	21889000	27	8	92	Oxidation (M)	40493	NADH dehydrogenase [ubiquinone] 1 alpha subcomplex subunit 10 mitochondrial OS=Rattus norvegicus OX=10116 GN=Ndufa10 PE=1 SV=1
27	252	tr|D3ZF13|D3ZF13_RAT	212.98	26	26	31495000	17	17	49	Oxidation (M)	17514	Acyl carrier protein OS=Rattus norvegicus OX=10116 GN=Ndufab1 PE=1 SV=1
24	211	tr|F1LXA0|F1LXA0_RAT	209.98	43	43	34341000	14	13	54	Oxidation (M)	17178	NADH dehydrogenase [ubiquinone] 1 alpha subcomplex subunit 12 OS=Rattus norvegicus OX=10116 GN=Ndufa12 PE=1 SV=2
21	8	P15999|ATPA_RAT	205.59	23	23	34097000	25	25	67	Oxidation (M)	59754	ATP synthase subunit alpha mitochondrial OS=Rattus norvegicus OX=10116 GN=Atp5f1a PE=1 SV=2
21	9	tr|F1LP05|F1LP05_RAT	205.59	23	23	34097000	25	25	67	Oxidation (M)	59813	ATP synthase subunit alpha OS=Rattus norvegicus OX=10116 GN=Atp5f1a PE=1 SV=1
23	172	tr|D4A0T0|D4A0T0_RAT	203.64	34	34	45590000	18	18	65		20859	NADH:ubiquinone oxidoreductase subunit B10 OS=Rattus norvegicus OX=10116 GN=Ndufb10 PE=1 SV=1
18	313	tr|D3ZZ21|D3ZZ21_RAT	203.58	53	53	32370000	19	19	75	Oxidation (M)	15638	NADH dehydrogenase (Ubiquinone) 1 beta subcomplex 6 (Predicted) OS=Rattus norvegicus OX=10116 GN=Ndufb6 PE=1 SV=1
31	198	Q80W89|NDUAB_RAT	202.22	24	24	48631000	12	12	41		14854	NADH dehydrogenase [ubiquinone] 1 alpha subcomplex subunit 11 OS=Rattus norvegicus OX=10116 GN=Ndufa11 PE=2 SV=1
9	74	tr|D3ZG43|D3ZG43_RAT	195.58	42	42	66800000	28	28	94		30226	NADH dehydrogenase (Ubiquinone) Fe-S protein 3 (Predicted) isoform CRA_c OS=Rattus norvegicus OX=10116 GN=Ndufs3 PE=1 SV=1
35	318	Q5M9I5|QCR6_RAT	194.3	21	21	40820000	11	11	38		10424	Cytochrome b-c1 complex subunit 6 mitochondrial OS=Rattus norvegicus OX=10116 GN=Uqcrh PE=3 SV=1
28	199	tr|B0BNE6|B0BNE6_RAT	188.75	25	25	26196000	16	16	49		23970	NADH dehydrogenase (Ubiquinone) Fe-S protein 8 (Predicted) isoform CRA_a OS=Rattus norvegicus OX=10116 GN=Ndufs8 PE=1 SV=1
26	274	tr|A0A1W2Q6F8|A0A1W2Q6F8_RAT	186.16	31	31	138450	21	2	49	Oxidation (M)	40544	NADH dehydrogenase [ubiquinone] 1 alpha subcomplex subunit 10 mitochondrial OS=Rattus norvegicus OX=10116 GN=Ndufa10l1 PE=3 SV=1
34	219	tr|D3ZS58|D3ZS58_RAT	182.98	24	24	22671000	12	12	38		10845	NADH dehydrogenase [ubiquinone] 1 alpha subcomplex subunit 2 OS=Rattus norvegicus OX=10116 GN=Ndufa2 PE=1 SV=1
29	827	tr|D4A3V2|D4A3V2_RAT	182.83	42	42	10352000	20	20	43		15224	NADH dehydrogenase [ubiquinone] 1 alpha subcomplex subunit 6 OS=Rattus norvegicus OX=10116 GN=Ndufa6 PE=1 SV=1
40	16	P02563|MYH6_RAT	179.18	6	6	6870700	16	16	29	Oxidation (M)	223506	Myosin-6 OS=Rattus norvegicus OX=10116 GN=Myh6 PE=1 SV=2
50	65	P31399|ATP5H_RAT	176.04	30	30	3798100	8	8	17		18763	ATP synthase subunit d mitochondrial OS=Rattus norvegicus OX=10116 GN=Atp5pd PE=1 SV=3
33	56	tr|F1LPG5|F1LPG5_RAT	170.71	31	31	19503000	12	12	38		15064	NADH:ubiquinone oxidoreductase subunit B4 OS=Rattus norvegicus OX=10116 GN=Ndufb4 PE=1 SV=1
33	57	tr|F1M7T1|F1M7T1_RAT	170.71	31	31	19503000	12	12	38		15160	NADH dehydrogenase (ubiquinone) 1 beta subcomplex 4 OS=Rattus norvegicus OX=10116 GN=LOC100361934 PE=4 SV=2
20	80	tr|Q5XIH3|Q5XIH3_RAT	169.88	20	20	38169000	22	22	70	Oxidation (M)	50731	NADH dehydrogenase [ubiquinone] flavoprotein 1 mitochondrial OS=Rattus norvegicus OX=10116 GN=Ndufv1 PE=1 SV=1
37	169	tr|A9UMV9|A9UMV9_RAT	164.05	30	30	78255000	9	9	35	Oxidation (M)	12500	NADH:ubiquinone oxidoreductase subunit A7 OS=Rattus norvegicus OX=10116 GN=Ndufa7 PE=1 SV=1
44	45	P00507|AATM_RAT	160.95	16	16	4411800	10	10	21	Oxidation (M)	47314	Aspartate aminotransferase mitochondrial OS=Rattus norvegicus OX=10116 GN=Got2 PE=1 SV=2
36	72	tr|D3ZE15|D3ZE15_RAT	149.38	35	35	13015000	10	10	35	Oxidation (M)	16777	NADH:ubiquinone oxidoreductase subunit A13 OS=Rattus norvegicus OX=10116 GN=Ndufa13 PE=1 SV=1
39	238	Q5XIF3|NDUS4_RAT	146.45	20	20	13704000	8	8	30	Oxidation (M)	19741	NADH dehydrogenase [ubiquinone] iron-sulfur protein 4 mitochondrial OS=Rattus norvegicus OX=10116 GN=Ndufs4 PE=1 SV=1
38	73	Q63362|NDUA5_RAT	141	48	48	6181200	15	12	30	Carbamidomethylation	13412	NADH dehydrogenase [ubiquinone] 1 alpha subcomplex subunit 5 OS=Rattus norvegicus OX=10116 GN=Ndufa5 PE=1 SV=3
41	3899	tr|B5DEL8|B5DEL8_RAT	138.55	30	30	11770000	9	9	28		12700	NADH dehydrogenase (Ubiquinone) Fe-S protein 5 OS=Rattus norvegicus OX=10116 GN=Ndufs5 PE=1 SV=1
41	3900	tr|A0A0G2JZJ9|A0A0G2JZJ9_RAT	138.55	30	30	11770000	9	9	28		12730	Uncharacterized protein OS=Rattus norvegicus OX=10116 PE=4 SV=1
59	251	P80432|COX7C_RAT	135.09	21	21	3179000	4	4	10		7375	Cytochrome c oxidase subunit 7C mitochondrial OS=Rattus norvegicus OX=10116 GN=Cox7c PE=1 SV=2
30	3918	tr|D3ZLT1|D3ZLT1_RAT	131.42	21	21	20071000	6	6	42	Oxidation (M)	16568	NADH dehydrogenase (Ubiquinone) 1 beta subcomplex 7 (Predicted) OS=Rattus norvegicus OX=10116 GN=Ndufb7 PE=1 SV=1
64	14	Q6AXV4|SAM50_RAT	126.2	9	9	813040	4	4	7		51960	Sorting and assembly machinery component 50 homolog OS=Rattus norvegicus OX=10116 GN=Samm50 PE=1 SV=1
58	200	P11240|COX5A_RAT	118.7	27	27	1952500	6	6	10		16130	Cytochrome c oxidase subunit 5A mitochondrial OS=Rattus norvegicus OX=10116 GN=Cox5a PE=1 SV=1
60	61	Q63704|CPT1B_RAT	115.68	3	3	488440	3	3	9		88217	Carnitine O-palmitoyltransferase 1 muscle isoform OS=Rattus norvegicus OX=10116 GN=Cpt1b PE=1 SV=1
46	3911	tr|B2RYW3|B2RYW3_RAT	112.45	29	29	5524300	7	7	19	Oxidation (M)	21892	NADH dehydrogenase (Ubiquinone) 1 beta subcomplex 9 OS=Rattus norvegicus OX=10116 GN=Ndufb9 PE=1 SV=1
52	28	tr|Q5UAJ6|Q5UAJ6_RAT	110.7	23	23	2200900	7	7	14	Oxidation (M)	25942	Cytochrome c oxidase subunit 2 OS=Rattus norvegicus OX=10116 GN=COX2 PE=3 SV=1
52	33	tr|S5RZM8|S5RZM8_RAT	110.7	23	23	2200900	7	7	14	Oxidation (M)	25958	Cytochrome c oxidase subunit 2 OS=Rattus norvegicus OX=10116 GN=COX2 PE=3 SV=1
52	34	P00406|COX2_RAT	110.7	23	23	2200900	7	7	14	Oxidation (M)	25928	Cytochrome c oxidase subunit 2 OS=Rattus norvegicus OX=10116 GN=Mtco2 PE=1 SV=3
52	35	tr|Q8SEZ5|Q8SEZ5_RAT	110.7	23	23	2200900	7	7	14	Oxidation (M)	25928	Cytochrome c oxidase subunit 2 OS=Rattus norvegicus OX=10116 GN=Mt-co2 PE=1 SV=1
52	36	tr|A0A097PE04|A0A097PE04_RAT	110.7	23	23	2200900	7	7	14	Oxidation (M)	25894	Cytochrome c oxidase subunit 2 OS=Rattus norvegicus OX=10116 GN=COX2 PE=3 SV=1
45	3893	tr|B2RYS2|B2RYS2_RAT	109.49	30	30	8803500	7	7	20		13559	Cytochrome b-c1 complex subunit 7 OS=Rattus norvegicus OX=10116 GN=Uqcrb PE=1 SV=1
57	253	P10817|CX6A2_RAT	108.57	23	23	4971900	5	5	10		10487	Cytochrome c oxidase subunit 6A2 mitochondrial (Fragment) OS=Rattus norvegicus OX=10116 GN=Cox6a2 PE=1 SV=3
57	254	tr|G3V8M4|G3V8M4_RAT	108.57	23	23	4971900	5	5	10		10802	Cytochrome c oxidase subunit 6A mitochondrial OS=Rattus norvegicus OX=10116 GN=Cox6a2 PE=3 SV=1
53	168	P19511|AT5F1_RAT	108.29	11	11	8232500	6	6	14		28869	ATP synthase F(0) complex subunit B1 mitochondrial OS=Rattus norvegicus OX=10116 GN=Atp5pb PE=1 SV=1
47	3906	tr|D3ZCZ9|D3ZCZ9_RAT	107.61	28	28	5516600	6	6	19		13040	NADH dehydrogenase [ubiquinone] iron-sulfur protein 6 mitochondrial OS=Rattus norvegicus OX=10116 GN=LOC100912599 PE=1 SV=1
49	3914	tr|B2RYU0|B2RYU0_RAT	105.16	21	21	10762000	5	5	18		11842	NADH dehydrogenase (Ubiquinone) 1 beta subcomplex 2 (Predicted) isoform CRA_b OS=Rattus norvegicus OX=10116 GN=Ndufb2 PE=1 SV=1
48	376	tr|Q5RJN0|Q5RJN0_RAT	100.49	18	18	9100300	5	5	18	Carbamidomethylation
62	3930	tr|Q35733|Q35733_RAT	97.8	14	14	2726300	3	3	9		8389	NADH-ubiquinone oxidoreductase chain 6 (Fragment) OS=Rattus norvegicus OX=10116 PE=3 SV=1
62	3921	tr|Q06QD9|Q06QD9_RAT	97.8	6	6	2726300	3	3	9		18943	NADH-ubiquinone oxidoreductase chain 6 OS=Rattus norvegicus OX=10116 GN=ND6 PE=3 SV=1
62	3922	tr|Q7HKW2|Q7HKW2_RAT	97.8	6	6	2726300	3	3	9		18957	NADH-ubiquinone oxidoreductase chain 6 OS=Rattus norvegicus OX=10116 GN=NADH6 PE=3 SV=1
51	385	tr|A0A0A1G491|A0A0A1G491_RAT	97.25	13	13	2787900	7	7	16	Oxidation (M)	38542	NADH-ubiquinone oxidoreductase chain 2 OS=Rattus norvegicus OX=10116 GN=ND2 PE=3 SV=1
51	384	tr|Q06Q97|Q06Q97_RAT	97.25	13	13	2787900	7	7	16	Oxidation (M)	38485	NADH-ubiquinone oxidoreductase chain 2 OS=Rattus norvegicus OX=10116 GN=ND2 PE=3 SV=1
51	386	tr|Q5UAJ8|Q5UAJ8_RAT	97.25	13	13	2787900	7	7	16	Oxidation (M)	38455	NADH-ubiquinone oxidoreductase chain 2 OS=Rattus norvegicus OX=10116 GN=ND2 PE=3 SV=1
51	388	tr|Q8HID0|Q8HID0_RAT	97.25	13	13	2787900	7	7	16	Oxidation (M)	38653	NADH-ubiquinone oxidoreductase chain 2 OS=Rattus norvegicus OX=10116 GN=Mt-nd2 PE=3 SV=1
51	389	P11662|NU2M_RAT	97.25	13	13	2787900	7	7	16	Oxidation (M)	38653	NADH-ubiquinone oxidoreductase chain 2 OS=Rattus norvegicus OX=10116 GN=Mtnd2 PE=3 SV=3
51	390	tr|Q06QH5|Q06QH5_RAT	97.25	13	13	2787900	7	7	16	Oxidation (M)	38626	NADH-ubiquinone oxidoreductase chain 2 OS=Rattus norvegicus OX=10116 GN=ND2 PE=3 SV=1
51	391	tr|Q8SEZ7|Q8SEZ7_RAT	97.25	13	13	2787900	7	7	16	Oxidation (M)	38580	NADH-ubiquinone oxidoreductase chain 2 (Fragment) OS=Rattus norvegicus OX=10116 GN=NADH2 PE=3 SV=1
51	392	tr|Q06QB0|Q06QB0_RAT	97.25	13	13	2787900	7	7	16	Oxidation (M)	38534	NADH-ubiquinone oxidoreductase chain 2 OS=Rattus norvegicus OX=10116 GN=ND2 PE=3 SV=1
51	393	tr|D2E6P4|D2E6P4_RAT	97.25	13	13	2787900	7	7	16	Oxidation (M)	38623	NADH-ubiquinone oxidoreductase chain 2 OS=Rattus norvegicus OX=10116 GN=ND2 PE=3 SV=1
51	394	tr|Q06QE9|Q06QE9_RAT	97.25	13	13	2787900	7	7	16	Oxidation (M)	38598	NADH-ubiquinone oxidoreductase chain 2 OS=Rattus norvegicus OX=10116 GN=ND2 PE=3 SV=1
42	208	Q7TQ16|QCR8_RAT	96.03	37	37	13081000	9	9	27		9849	Cytochrome b-c1 complex subunit 8 OS=Rattus norvegicus OX=10116 GN=Uqcrq PE=3 SV=1
56	63	P35435|ATPG_RAT	95.49	15	15	1399300	6	6	11		30191	ATP synthase subunit gamma mitochondrial OS=Rattus norvegicus OX=10116 GN=Atp5f1c PE=1 SV=2
56	64	tr|Q6QI09|Q6QI09_RAT	95.49	7	7	1399300	6	6	11		67721	ATP synthase subunit gamma mitochondrial OS=Rattus norvegicus OX=10116 GN=Taf3 PE=1 SV=1
54	363	P05508|NU4M_RAT	95.13	11	11	2906600	8	8	12	Oxidation (M)
54	364	tr|D2E6K0|D2E6K0_RAT	95.13	11	11	2906600	8	8	12	Oxidation (M)
54	365	tr|A7XYB9|A7XYB9_RAT	95.13	11	11	2906600	8	8	12	Oxidation (M)
54	366	tr|Q06QE1|Q06QE1_RAT	95.13	11	11	2906600	8	8	12	Oxidation (M)
54	367	tr|Q06QA2|Q06QA2_RAT	95.13	11	11	2906600	8	8	12	Oxidation (M)
54	368	tr|Q7HKW3|Q7HKW3_RAT	95.13	11	11	2906600	8	8	12	Oxidation (M)
54	369	tr|Q06QG7|Q06QG7_RAT	95.13	11	11	2906600	8	8	12	Oxidation (M)
54	370	tr|Q06Q89|Q06Q89_RAT	95.13	11	11	2906600	8	8	12	Oxidation (M)
54	371	tr|Q35737|Q35737_RAT	95.13	11	11	2906600	8	8	12	Oxidation (M)
54	372	tr|Q8HIC6|Q8HIC6_RAT	95.13	11	11	2906600	8	8	12	Oxidation (M)
43	3901	tr|Q8SEZ8|Q8SEZ8_RAT	91.15	10	10	8694500	9	9	22	Oxidation (M)	36133	NADH-ubiquinone oxidoreductase chain 1 (Fragment) OS=Rattus norvegicus OX=10116 GN=NADH1 PE=3 SV=1
43	3902	P03889|NU1M_RAT	91.15	10	10	8694500	9	9	22	Oxidation (M)	36145	NADH-ubiquinone oxidoreductase chain 1 OS=Rattus norvegicus OX=10116 GN=Mtnd1 PE=1 SV=3
43	3903	tr|Q8HID1|Q8HID1_RAT	91.15	10	10	8694500	9	9	22	Oxidation (M)	36145	NADH-ubiquinone oxidoreductase chain 1 OS=Rattus norvegicus OX=10116 GN=Mt-nd1 PE=3 SV=1
43	3904	tr|D2E6L7|D2E6L7_RAT	91.15	10	10	8694500	9	9	22	Oxidation (M)	36062	NADH-ubiquinone oxidoreductase chain 1 OS=Rattus norvegicus OX=10116 GN=ND1 PE=3 SV=1
76	17	Q9ER34|ACON_RAT	87.7	3	3	261840	3	3	4		85433	Aconitate hydratase mitochondrial OS=Rattus norvegicus OX=10116 GN=Aco2 PE=1 SV=2
68	3924	Q6PCU8|NDUV3_RAT	84.04	19	19	1434300	3	3	5		11942	NADH dehydrogenase [ubiquinone] flavoprotein 3 mitochondrial OS=Rattus norvegicus OX=10116 GN=Ndufv3 PE=3 SV=1
55	467	tr|D4A4P3|D4A4P3_RAT	77.45	30	30	4732000	5	5	12	Oxidation (M)	11267	NADH:ubiquinone oxidoreductase subunit B3 OS=Rattus norvegicus OX=10116 GN=Ndufb3 PE=1 SV=1
72	76	Q06647|ATPO_RAT	76.54	8	8	744140	2	2	4		23398	ATP synthase subunit O mitochondrial OS=Rattus norvegicus OX=10116 GN=Atp5po PE=1 SV=1
77	245	tr|C8CHS6|C8CHS6_RAT	75.85	15	15	712250	1	1	4		7988	Mitochondrial superoxide dismutase 2 (Fragment) OS=Rattus norvegicus OX=10116 PE=2 SV=1
77	71	P07895|SODM_RAT	75.85	5	5	712250	1	1	4		24674	Superoxide dismutase [Mn] mitochondrial OS=Rattus norvegicus OX=10116 GN=Sod2 PE=1 SV=2
61	334	tr|A0A0G2KB63|A0A0G2KB63_RAT	72.38	6	6	2660900	4	4	9		33168	Prohibitin OS=Rattus norvegicus OX=10116 GN=Phb2 PE=1 SV=1
61	335	Q5XIH7|PHB2_RAT	72.38	6	6	2660900	4	4	9		33312	Prohibitin-2 OS=Rattus norvegicus OX=10116 GN=Phb2 PE=1 SV=1
65	21	Q64428|ECHA_RAT	71.7	4	4	599860	3	3	6		82665	Trifunctional enzyme subunit alpha mitochondrial OS=Rattus norvegicus OX=10116 GN=Hadha PE=1 SV=2
103	233	tr|Q5UAJ5|Q5UAJ5_RAT	69.06	16	16	468270	2	2	2		7642	ATP synthase protein 8 OS=Rattus norvegicus OX=10116 GN=ATP8 PE=3 SV=1
103	234	P11608|ATP8_RAT	69.06	16	16	468270	2	2	2		7630	ATP synthase protein 8 OS=Rattus norvegicus OX=10116 GN=Mt-atp8 PE=1 SV=2
103	235	tr|Q8SEZ4|Q8SEZ4_RAT	69.06	16	16	468270	2	2	2		7632	ATP synthase protein 8 OS=Rattus norvegicus OX=10116 GN=ATPase8 PE=3 SV=1
103	236	tr|Q8HIC8|Q8HIC8_RAT	69.06	16	16	468270	2	2	2		7630	ATP synthase protein 8 OS=Rattus norvegicus OX=10116 GN=Mt-atp8 PE=3 SV=1
97	11	tr|A0A140TAG5|A0A140TAG5_RAT	67.14	4	4	302240	2	2	2		67049	MICOS complex subunit MIC60 OS=Rattus norvegicus OX=10116 GN=Immt PE=1 SV=1
97	12	Q3KR86|MIC60_RAT	67.14	4	4	302240	2	2	2		67177	MICOS complex subunit Mic60 (Fragment) OS=Rattus norvegicus OX=10116 GN=Immt PE=1 SV=1
97	10	tr|A0A0G2JVH4|A0A0G2JVH4_RAT	67.14	3	3	302240	2	2	2		86230	MICOS complex subunit MIC60 OS=Rattus norvegicus OX=10116 GN=Immt PE=1 SV=1
67	40	tr|A0A0G2K330|A0A0G2K330_RAT	66.36	4	4	654110	3	3	5		52568	Trifunctional enzyme subunit beta mitochondrial OS=Rattus norvegicus OX=10116 GN=Hadhb PE=1 SV=1
67	29	Q60587|ECHB_RAT	66.36	4	4	654110	3	3	5		51414	Trifunctional enzyme subunit beta mitochondrial OS=Rattus norvegicus OX=10116 GN=Hadhb PE=1 SV=1
88	263	P35171|CX7A2_RAT	64.71	12	12	322990	2	2	3		9353	Cytochrome c oxidase subunit 7A2 mitochondrial OS=Rattus norvegicus OX=10116 GN=Cox7a2 PE=1 SV=1
88	264	tr|B2RYS0|B2RYS0_RAT	64.71	12	12	322990	2	2	3		9353	Cox7a2 protein OS=Rattus norvegicus OX=10116 GN=Cox7a2 PE=2 SV=1
73	1021	tr|Q06QA9|Q06QA9_RAT	58.61	3	3	328740	2	2	4		56893	Cytochrome c oxidase subunit 1 OS=Rattus norvegicus OX=10116 GN=CO1 PE=3 SV=1
73	1022	tr|Q06QK0|Q06QK0_RAT	58.61	3	3	328740	2	2	4		56880	Cytochrome c oxidase subunit 1 OS=Rattus norvegicus OX=10116 GN=CO1 PE=3 SV=1
73	1023	tr|Q8SEZ6|Q8SEZ6_RAT	58.61	3	3	328740	2	2	4		56879	Cytochrome c oxidase subunit 1 OS=Rattus norvegicus OX=10116 GN=COI PE=3 SV=1
73	1024	tr|A0A0A1FZ34|A0A0A1FZ34_RAT	58.61	3	3	328740	2	2	4		56937	Cytochrome c oxidase subunit 1 OS=Rattus norvegicus OX=10116 GN=COX1 PE=3 SV=1
73	1025	tr|Q8HIC9|Q8HIC9_RAT	58.61	3	3	328740	2	2	4		56845	Cytochrome c oxidase subunit 1 OS=Rattus norvegicus OX=10116 GN=Mt-co1 PE=3 SV=1
73	1026	P05503|COX1_RAT	58.61	3	3	328740	2	2	4		56845	Cytochrome c oxidase subunit 1 OS=Rattus norvegicus OX=10116 GN=Mtco1 PE=2 SV=3
73	1027	tr|Q95938|Q95938_RAT	58.61	3	3	328740	2	2	4		56977	Cytochrome c oxidase subunit 1 OS=Rattus norvegicus OX=10116 GN=Co I PE=3 SV=1
78	532	P67779|PHB_RAT	54.81	6	6	247360	2	2	3		29820	Prohibitin OS=Rattus norvegicus OX=10116 GN=Phb PE=1 SV=1
78	531	tr|D3ZFH6|D3ZFH6_RAT	54.81	6	6	247360	2	2	3		29594	Prohibitin OS=Rattus norvegicus OX=10116 GN=Phb-ps1 PE=3 SV=3
85	209	tr|B2RZD6|B2RZD6_RAT	51.54	18	18	755370	2	2	3		9327	NDUFA4 mitochondrial complex-associated OS=Rattus norvegicus OX=10116 GN=Ndufa4 PE=1 SV=1
63	474	tr|F1LN92|F1LN92_RAT	50.9	5	5	1542300	4	4	8		89352	AFG3-like matrix AAA peptidase subunit 2 OS=Rattus norvegicus OX=10116 GN=Afg3l2 PE=1 SV=1
153	4	P08461|ODP2_RAT	50.08	2	2	246740	1	1	1		67166	Dihydrolipoyllysine-residue acetyltransferase component of pyruvate dehydrogenase complex mitochondrial OS=Rattus norvegicus OX=10116 GN=Dlat PE=1 SV=3
87	315	tr|G3V7I0|G3V7I0_RAT	46.62	5	5	353820	1	1	3		28299	Peroxiredoxin 3 OS=Rattus norvegicus OX=10116 GN=Prdx3 PE=1 SV=1
87	316	Q9Z0V6|PRDX3_RAT	46.62	5	5	353820	1	1	3		28295	Thioredoxin-dependent peroxide reductase mitochondrial OS=Rattus norvegicus OX=10116 GN=Prdx3 PE=1 SV=2
74	55	tr|A0A1W2Q605|A0A1W2Q605_RAT	45.4	8	8	339750	3	3	4		13534	Solute carrier family 25 member 31 (Fragment) OS=Rattus norvegicus OX=10116 GN=Slc25a31 PE=3 SV=1
74	23	tr|Q6P9Y4|Q6P9Y4_RAT	45.4	3	3	339750	3	3	4		32904	ADP/ATP translocase 1 OS=Rattus norvegicus OX=10116 GN=Slc25a4 PE=1 SV=1
74	24	Q05962|ADT1_RAT	45.4	3	3	339750	3	3	4		32989	ADP/ATP translocase 1 OS=Rattus norvegicus OX=10116 GN=Slc25a4 PE=1 SV=3
74	27	Q09073|ADT2_RAT	45.4	3	3	339750	3	3	4		32901	ADP/ATP translocase 2 OS=Rattus norvegicus OX=10116 GN=Slc25a5 PE=1 SV=3
74	43	tr|D3ZB81|D3ZB81_RAT	45.4	3	3	339750	3	3	4		35227	Solute carrier family 25 member 31 OS=Rattus norvegicus OX=10116 GN=Slc25a31 PE=3 SV=3
102	215	P33124|ACSL6_RAT	41.6	2	2	0	2	1	2		78180	Long-chain-fatty-acid--CoA ligase 6 OS=Rattus norvegicus OX=10116 GN=Acsl6 PE=1 SV=1
102	47	P18163|ACSL1_RAT	41.6	2	2	0	2	1	2		78179	Long-chain-fatty-acid--CoA ligase 1 OS=Rattus norvegicus OX=10116 GN=Acsl1 PE=1 SV=1
99	8042	tr|Q4G067|Q4G067_RAT	40.68	3	3	176910	1	1	2		37440	Mitochondrial ribosomal protein L44 OS=Rattus norvegicus OX=10116 GN=Mrpl44 PE=1 SV=1
104	3915	tr|Q8SEZ1|Q8SEZ1_RAT	40.25	6	6	353550	1	1	2		13087	NADH-ubiquinone oxidoreductase chain 3 OS=Rattus norvegicus OX=10116 GN=Mt-nd3 PE=2 SV=1
104	3916	P05506|NU3M_RAT	40.25	6	6	353550	1	1	2		13087	NADH-ubiquinone oxidoreductase chain 3 OS=Rattus norvegicus OX=10116 GN=Mtnd3 PE=3 SV=3
104	3938	tr|A0A0A1FZ38|A0A0A1FZ38_RAT	40.25	6	6	353550	1	1	2		13071	NADH-ubiquinone oxidoreductase chain 3 OS=Rattus norvegicus OX=10116 GN=ND3 PE=3 SV=1
104	3939	tr|Q06QG9|Q06QG9_RAT	40.25	6	6	353550	1	1	2		13075	NADH-ubiquinone oxidoreductase chain 3 OS=Rattus norvegicus OX=10116 GN=ND3 PE=3 SV=1
82	44	P17764|THIL_RAT	39.12	3	3	567070	1	1	3		44695	Acetyl-CoA acetyltransferase mitochondrial OS=Rattus norvegicus OX=10116 GN=Acat1 PE=1 SV=1
154	2	Q01205|ODO2_RAT	38.58	4	4	251850	1	1	1		48925	Dihydrolipoyllysine-residue succinyltransferase component of 2-oxoglutarate dehydrogenase complex mitochondrial OS=Rattus norvegicus OX=10116 GN=Dlst PE=1 SV=2
154	1	tr|G3V6P2|G3V6P2_RAT	38.58	4	4	251850	1	1	1		48899	Dihydrolipoamide S-succinyltransferase (E2 component of 2-oxo-glutarate complex) isoform CRA_a OS=Rattus norvegicus OX=10116 GN=Dlst PE=1 SV=1
71	75	Q6PDU7|ATP5L_RAT	38.18	16	16	426780	1	1	4		11433	ATP synthase subunit g mitochondrial OS=Rattus norvegicus OX=10116 GN=Atp5mg PE=1 SV=2
79	4322	tr|A0A0G2JX15|A0A0G2JX15_RAT	34.08	1	1	171350	2	1	3		121101	Cation-transporting ATPase OS=Rattus norvegicus OX=10116 GN=Atp13a2 PE=3 SV=1
79	1051	tr|B5DEH6|B5DEH6_RAT	34.08	1	1	171350	2	1	3		124814	Cation-transporting ATPase OS=Rattus norvegicus OX=10116 GN=Atp13a2 PE=2 SV=1
79	1052	tr|F1MAA4|F1MAA4_RAT	34.08	1	1	171350	2	1	3		124838	Cation-transporting ATPase OS=Rattus norvegicus OX=10116 GN=Atp13a2 PE=3 SV=2
105	3932	tr|D3ZD09|D3ZD09_RAT	33.98	12	12	214750	1	1	2		10071	Cytochrome c oxidase subunit OS=Rattus norvegicus OX=10116 GN=Cox6b1 PE=1 SV=1
80	3936	tr|A0A0G2K8Q8|A0A0G2K8Q8_RAT	32.99	21	21	927700	2	2	3		7099	Ubiquinol-cytochrome c reductase complex III subunit X OS=Rattus norvegicus OX=10116 GN=Uqcr10 PE=1 SV=1
80	3937	tr|B2RYX1|B2RYX1_RAT	32.99	20	20	927700	2	2	3		7462	LOC685322 protein OS=Rattus norvegicus OX=10116 GN=Uqcr10 PE=2 SV=1
69	3958	tr|D3ZD73|D3ZD73_RAT	32.09	2	2		2	0	5		54245	DEAD-box helicase 6 OS=Rattus norvegicus OX=10116 GN=Ddx6 PE=1 SV=1
66	3919	tr|A9UMV7|A9UMV7_RAT	32.02	11	11	827170	1	1	6		6539	RCG29512 OS=Rattus norvegicus OX=10116 GN=Uqcr11 PE=1 SV=1
106	343	Q924S5|LONM_RAT	31.79	1	1	53561	1	1	2		105792	Lon protease homolog mitochondrial OS=Rattus norvegicus OX=10116 GN=Lonp1 PE=2 SV=1
98	3951	tr|B1WBP7|B1WBP7_RAT	31.03	13	13	102970	2	2	2		12884	ATP synthase subunit delta mitochondrial OS=Rattus norvegicus OX=10116 GN=Atp5f1d PE=1 SV=1
98	3953	tr|G3V7Y3|G3V7Y3_RAT	31.03	10	10	102970	2	2	2		17563	ATP synthase subunit delta mitochondrial OS=Rattus norvegicus OX=10116 GN=Atp5f1d PE=1 SV=1
120	524	tr|D4A054|D4A054_RAT	30.11	0	0	416810	1	1	1		341403	RAN-binding protein 2 OS=Rattus norvegicus OX=10116 GN=Ranbp2 PE=1 SV=2
120	525	tr|M0R3M4|M0R3M4_RAT	30.11	0	0	416810	1	1	1		344396	RAN-binding protein 2 OS=Rattus norvegicus OX=10116 GN=Ranbp2 PE=1 SV=1
90	151	P12075|COX5B_RAT	29.69	9	9	1186200	2	2	2		13915	Cytochrome c oxidase subunit 5B mitochondrial OS=Rattus norvegicus OX=10116 GN=Cox5b PE=1 SV=2
155	3934	Q66H47|RM24_RAT	28.92	6	6	0	1	1	1		25001	39S ribosomal protein L24 mitochondrial OS=Rattus norvegicus OX=10116 GN=Mrpl24 PE=2 SV=1
93	377	P97521|MCAT_RAT	28.13	4	4	1186700	1	1	2	Formylation	33154	Mitochondrial carnitine/acylcarnitine carrier protein OS=Rattus norvegicus OX=10116 GN=Slc25a20 PE=1 SV=1
93	241	tr|Q66HP8|Q66HP8_RAT	28.13	4	4	1186700	1	1	2	Formylation	33071	Mitochondrial carnitine/acylcarnitine carrier protein OS=Rattus norvegicus OX=10116 GN=Slc25a20 PE=1 SV=1
107	292	P10888|COX41_RAT	27.42	4	4	184490	1	1	2		19515	Cytochrome c oxidase subunit 4 isoform 1 mitochondrial OS=Rattus norvegicus OX=10116 GN=Cox4i1 PE=1 SV=1
91	4670	tr|E9PU34|E9PU34_RAT	26.64	3	3	3030200	2	1	2	Formylation	51699	RCG41110 OS=Rattus norvegicus OX=10116 GN=Rmnd1 PE=1 SV=2
141	66	P56574|IDHP_RAT	26.19	2	2	115380	1	1	1		50967	Isocitrate dehydrogenase [NADP] mitochondrial OS=Rattus norvegicus OX=10116 GN=Idh2 PE=1 SV=2
138	266	tr|Q7H115|Q7H115_RAT	25.86	3	3	0	1	1	1		29871	Cytochrome c oxidase subunit 3 OS=Rattus norvegicus OX=10116 GN=Mt-co3 PE=3 SV=1
138	267	tr|I6V4L9|I6V4L9_RAT	25.86	3	3	0	1	1	1		29844	Cytochrome c oxidase subunit 3 OS=Rattus norvegicus OX=10116 GN=COX3 PE=3 SV=1
138	269	tr|A0A096XKT2|A0A096XKT2_RAT	25.86	3	3	0	1	1	1		29901	Cytochrome c oxidase subunit 3 OS=Rattus norvegicus OX=10116 GN=COX3 PE=3 SV=1
138	270	P05505|COX3_RAT	25.86	3	3	0	1	1	1		29871	Cytochrome c oxidase subunit 3 OS=Rattus norvegicus OX=10116 GN=Mtco3 PE=1 SV=5
138	271	tr|Q8SEZ2|Q8SEZ2_RAT	25.86	3	3	0	1	1	1		29870	Cytochrome c oxidase subunit 3 (Fragment) OS=Rattus norvegicus OX=10116 GN=COIII PE=3 SV=1
138	268	tr|Q8M7G4|Q8M7G4_RAT	25.86	3	3	0	1	1	1		29861	Cytochrome c oxidase subunit 3 OS=Rattus norvegicus OX=10116 PE=2 SV=1
156	8046	Q5M807|RNF5_RAT	25.24	3	3	0	1	1	1		19837	E3 ubiquitin-protein ligase RNF5 OS=Rattus norvegicus OX=10116 GN=Rnf5 PE=2 SV=1
109	3985	tr|Q5XFW4|Q5XFW4_RAT	24.92	12	12	458860	2	2	2		20541	Mitochondrial ribosomal protein L13 OS=Rattus norvegicus OX=10116 GN=Mrpl13 PE=1 SV=1
83	4091	P0DN35|NDUB1_RAT	24.66	18	18	757890	1	1	3		6998	NADH dehydrogenase [ubiquinone] 1 beta subcomplex subunit 1 OS=Rattus norvegicus OX=10116 GN=Ndufb1 PE=3 SV=1
139	8043	Q8K1M7|BRNP3_RAT	23.5	1	1	0	1	1	1		88497	BMP/retinoic acid-inducible neural-specific protein 3 OS=Rattus norvegicus OX=10116 GN=Brinp3 PE=2 SV=1
110	398	tr|B2RYT5|B2RYT5_RAT	23	8	8	275370	1	1	2		12651	Cox7a2l protein OS=Rattus norvegicus OX=10116 GN=Cox7a2l PE=2 SV=1
110	399	tr|D3ZYX8|D3ZYX8_RAT	23	8	8	275370	1	1	2		13274	Cytochrome c oxidase subunit 7A2-like OS=Rattus norvegicus OX=10116 GN=Cox7a2l PE=1 SV=1
157	3917	tr|D3ZJG4|D3ZJG4_RAT	22.08	1	1	727700	1	1	1	Oxidation (M)	95972	Phosphofurin acidic cluster sorting protein 2 OS=Rattus norvegicus OX=10116 GN=Pacs2 PE=1 SV=2
111	1034	P05696|KPCA_RAT	20.89	1	1	759000	1	1	2		76792	Protein kinase C alpha type OS=Rattus norvegicus OX=10116 GN=Prkca PE=1 SV=3

## Sheet: RHM PTP III(2)-IV(x)
Protein Group	Protein ID	Accession	-10lgP	Coverage (%)	Coverage (%) Sample 7	IBAQ	#Peptides	#Unique	#Spec Sample 7	PTM	Avg. Mass	Description
1	5	P10719|ATPB_RAT	339.53	29	29	165310000	68	66	199	Oxidation (M)	56354	ATP synthase subunit beta mitochondrial OS=Rattus norvegicus OX=10116 GN=Atp5f1b PE=1 SV=2
1	6	tr|G3V6D3|G3V6D3_RAT	339.53	29	29	165310000	68	66	199	Oxidation (M)	56345	ATP synthase subunit beta OS=Rattus norvegicus OX=10116 GN=Atp5f1b PE=1 SV=1
7	58	P20788|UCRI_RAT	253.19	24	24	14717000	26	26	57		29446	Cytochrome b-c1 complex subunit Rieske mitochondrial OS=Rattus norvegicus OX=10116 GN=Uqcrfs1 PE=1 SV=2
2	8	P15999|ATPA_RAT	251.13	36	36	64478000	63	62	152	Oxidation (M)	59754	ATP synthase subunit alpha mitochondrial OS=Rattus norvegicus OX=10116 GN=Atp5f1a PE=1 SV=2
2	9	tr|F1LP05|F1LP05_RAT	251.13	36	36	64478000	63	62	152	Oxidation (M)	59813	ATP synthase subunit alpha OS=Rattus norvegicus OX=10116 GN=Atp5f1a PE=1 SV=1
10	59	tr|D3ZFQ8|D3ZFQ8_RAT	249.65	27	27	15222000	23	23	52	Oxidation (M)		Cytochrome c-1
3	37	P19234|NDUV2_RAT	223.99	33	33	27460000	24	24	65		27378	NADH dehydrogenase [ubiquinone] flavoprotein 2 mitochondrial OS=Rattus norvegicus OX=10116 GN=Ndufv2 PE=1 SV=2
18	64	tr|Q6QI09|Q6QI09_RAT	219.17	10	10	5315700	19	19	34	Oxidation (M)	67721	ATP synthase subunit gamma mitochondrial OS=Rattus norvegicus OX=10116 GN=Taf3 PE=1 SV=1
18	63	P35435|ATPG_RAT	219.17	22	22	5315700	19	19	34	Oxidation (M)	30191	ATP synthase subunit gamma mitochondrial OS=Rattus norvegicus OX=10116 GN=Atp5f1c PE=1 SV=2
21	212	tr|B2RYS8|B2RYS8_RAT	217.7	27	27	6183700	16	16	30	Oxidation (M)	21959	NADH dehydrogenase [ubiquinone] 1 beta subcomplex subunit 8 mitochondrial OS=Rattus norvegicus OX=10116 GN=Ndufb8 PE=1 SV=1
5	20	Q66HF1|NDUS1_RAT	216.87	18	18	12394000	31	31	59	Carbamidomethylation	79412	NADH-ubiquinone oxidoreductase 75 kDa subunit mitochondrial OS=Rattus norvegicus OX=10116 GN=Ndufs1 PE=1 SV=1
24	200	P11240|COX5A_RAT	216.63	39	39	3059700	15	15	27		16130	Cytochrome c oxidase subunit 5A mitochondrial OS=Rattus norvegicus OX=10116 GN=Cox5a PE=1 SV=1
4	45	P00507|AATM_RAT	215.58	28	28	13810000	34	34	64	Oxidation (M)	47314	Aspartate aminotransferase mitochondrial OS=Rattus norvegicus OX=10116 GN=Got2 PE=1 SV=2
17	65	P31399|ATP5H_RAT	213.43	38	38	13146000	17	17	35	Oxidation (M)	18763	ATP synthase subunit d mitochondrial OS=Rattus norvegicus OX=10116 GN=Atp5pd PE=1 SV=3
15	101	tr|A0A097PE40|A0A097PE40_RAT	210.95	16	16	1115400	18	2	42		42865	Cytochrome b OS=Rattus norvegicus OX=10116 GN=CYTB PE=3 SV=1
6	405	P14882|PCCA_RAT	208.33	24	24	906860	32	2	58	Carbamidomethylation		Propionyl-CoA carboxylase alpha chain, mitochondrial
8	403	tr|A0A0G2K401|A0A0G2K401_RAT	208.06	23	23	218060	32	2	57	Carbamidomethylation		Propionyl-CoA carboxylase alpha chain, mitochondrial
8	404	tr|A0A0G2K5P9|A0A0G2K5P9_RAT	208.06	22	22	218060	32	2	57	Carbamidomethylation
16	99	tr|A0A385HC93|A0A385HC93_RAT	203.25	14	14	132890	17	1	38		42751	Cytochrome b (Fragment) OS=Rattus norvegicus OX=10116 PE=3 SV=1
12	25	Q68FY0|QCR1_RAT	201.21	20	20	9139400	24	24	45	Carbamidomethylation	52849	Cytochrome b-c1 complex subunit 1 mitochondrial OS=Rattus norvegicus OX=10116 GN=Uqcrc1 PE=1 SV=1
13	26	Q641Y2|NDUS2_RAT	192.46	17	17	12402000	21	21	45		52562	NADH dehydrogenase [ubiquinone] iron-sulfur protein 2 mitochondrial OS=Rattus norvegicus OX=10116 GN=Ndufs2 PE=1 SV=1
22	17	Q9ER34|ACON_RAT	186.86	11	11	4611300	18	18	28		85433	Aconitate hydratase mitochondrial OS=Rattus norvegicus OX=10116 GN=Aco2 PE=1 SV=2
25	161	tr|A0A0G2JVL6|A0A0G2JVL6_RAT	176.99	34	34	11286000	14	14	27	Carbamidomethylation	19965	NADH dehydrogenase [ubiquinone] 1 alpha subcomplex subunit 8 OS=Rattus norvegicus OX=10116 GN=Ndufa8 PE=1 SV=1
44	248	tr|A9UMW2|A9UMW2_RAT	175.25	42	42	5272300	6	6	15	Oxidation (M)	9255	Ndufa3 protein (Fragment) OS=Rattus norvegicus OX=10116 GN=Ndufa3 PE=2 SV=1
44	250	tr|A0A0G2KAA3|A0A0G2KAA3_RAT	175.25	38	38	5272300	6	6	15	Oxidation (M)	10170	NADH:ubiquinone oxidoreductase subunit A3 OS=Rattus norvegicus OX=10116 GN=Ndufa3 PE=1 SV=1
44	249	tr|M0RB63|M0RB63_RAT	175.25	42	42	5272300	6	6	15	Oxidation (M)	9372	RCG63041 OS=Rattus norvegicus OX=10116 GN=LOC684509 PE=4 SV=1
48	211	tr|F1LXA0|F1LXA0_RAT	167.34	21	21	2387700	9	9	14		17178	NADH dehydrogenase [ubiquinone] 1 alpha subcomplex subunit 12 OS=Rattus norvegicus OX=10116 GN=Ndufa12 PE=1 SV=2
34	160	tr|D4A7L4|D4A7L4_RAT	167.09	23	23	5683800	9	9	19		17634	NADH dehydrogenase (Ubiquinone) 1 beta subcomplex 11 (Predicted) OS=Rattus norvegicus OX=10116 GN=Ndufb11 PE=1 SV=1
31	60	tr|D4A565|D4A565_RAT	165.31	26	26	3166100	12	12	20		21664	NADH dehydrogenase (Ubiquinone) 1 beta subcomplex 5 (Predicted) isoform CRA_b OS=Rattus norvegicus OX=10116 GN=Ndufb5 PE=1 SV=1
37	251	P80432|COX7C_RAT	163.96	21	21	5052100	5	5	17		7375	Cytochrome c oxidase subunit 7C mitochondrial OS=Rattus norvegicus OX=10116 GN=Cox7c PE=1 SV=2
11	8294	tr|Q68FZ8|Q68FZ8_RAT	160.56	22	22	8064400	23	23	46	Carbamidomethylation		Propionyl coenzyme A carboxylase, beta polypeptide
49	31	P45953|ACADV_RAT	160.07	9	9	1745500	9	9	13		70749	Very long-chain specific acyl-CoA dehydrogenase mitochondrial OS=Rattus norvegicus OX=10116 GN=Acadvl PE=1 SV=1
49	32	tr|Q5M9H2|Q5M9H2_RAT	160.07	9	9	1745500	9	9	13		70821	Acyl-Coenzyme A dehydrogenase very long chain OS=Rattus norvegicus OX=10116 GN=Acadvl PE=1 SV=1
19	29	Q60587|ECHB_RAT	159.32	15	15	4517400	17	17	33		51414	Trifunctional enzyme subunit beta mitochondrial OS=Rattus norvegicus OX=10116 GN=Hadhb PE=1 SV=1
19	40	tr|A0A0G2K330|A0A0G2K330_RAT	159.32	14	14	4517400	17	17	33		52568	Trifunctional enzyme subunit beta mitochondrial OS=Rattus norvegicus OX=10116 GN=Hadhb PE=1 SV=1
35	198	Q80W89|NDUAB_RAT	156.27	18	18	4622300	9	9	18		14854	NADH dehydrogenase [ubiquinone] 1 alpha subcomplex subunit 11 OS=Rattus norvegicus OX=10116 GN=Ndufa11 PE=2 SV=1
14	28	tr|Q5UAJ6|Q5UAJ6_RAT	154.17	40	40	8904600	22	22	43	Oxidation (M)	25942	Cytochrome c oxidase subunit 2 OS=Rattus norvegicus OX=10116 GN=COX2 PE=3 SV=1
14	33	tr|S5RZM8|S5RZM8_RAT	154.17	40	40	8904600	22	22	43	Oxidation (M)	25958	Cytochrome c oxidase subunit 2 OS=Rattus norvegicus OX=10116 GN=COX2 PE=3 SV=1
14	34	P00406|COX2_RAT	154.17	40	40	8904600	22	22	43	Oxidation (M)	25928	Cytochrome c oxidase subunit 2 OS=Rattus norvegicus OX=10116 GN=Mtco2 PE=1 SV=3
14	35	tr|Q8SEZ5|Q8SEZ5_RAT	154.17	40	40	8904600	22	22	43	Oxidation (M)	25928	Cytochrome c oxidase subunit 2 OS=Rattus norvegicus OX=10116 GN=Mt-co2 PE=1 SV=1
14	36	tr|A0A097PE04|A0A097PE04_RAT	154.17	40	40	8904600	22	22	43	Oxidation (M)	25894	Cytochrome c oxidase subunit 2 OS=Rattus norvegicus OX=10116 GN=COX2 PE=3 SV=1
47	14	Q6AXV4|SAM50_RAT	153.8	13	13	1024300	11	11	14		51960	Sorting and assembly machinery component 50 homolog OS=Rattus norvegicus OX=10116 GN=Samm50 PE=1 SV=1
36	252	tr|D3ZF13|D3ZF13_RAT	149.92	22	22	2341400	10	10	17		17514	Acyl carrier protein OS=Rattus norvegicus OX=10116 GN=Ndufab1 PE=1 SV=1
23	74	tr|D3ZG43|D3ZG43_RAT	149.55	29	29	6247200	14	14	27		30226	NADH dehydrogenase (Ubiquinone) Fe-S protein 3 (Predicted) isoform CRA_c OS=Rattus norvegicus OX=10116 GN=Ndufs3 PE=1 SV=1
26	77	tr|Q5PQZ9|Q5PQZ9_RAT	149.37	37	37	6434300	10	10	24		14359	NADH dehydrogenase [ubiquinone] 1 subunit C2 OS=Rattus norvegicus OX=10116 GN=Ndufc2 PE=1 SV=1
9	50	P32551|QCR2_RAT	148.38	13	13	28638000	17	17	53	Oxidation (M)	48396	Cytochrome b-c1 complex subunit 2 mitochondrial OS=Rattus norvegicus OX=10116 GN=Uqcrc2 PE=1 SV=2
27	21	Q64428|ECHA_RAT	147.72	11	11	3645500	14	14	24		82665	Trifunctional enzyme subunit alpha mitochondrial OS=Rattus norvegicus OX=10116 GN=Hadha PE=1 SV=2
39	10	tr|A0A0G2JVH4|A0A0G2JVH4_RAT	141.73	10	10	1530800	12	12	16		86230	MICOS complex subunit MIC60 OS=Rattus norvegicus OX=10116 GN=Immt PE=1 SV=1
30	253	P10817|CX6A2_RAT	137.51	26	26	7353800	8	6	21		10487	Cytochrome c oxidase subunit 6A2 mitochondrial (Fragment) OS=Rattus norvegicus OX=10116 GN=Cox6a2 PE=1 SV=3
30	254	tr|G3V8M4|G3V8M4_RAT	137.51	25	25	7353800	8	6	21		10802	Cytochrome c oxidase subunit 6A mitochondrial OS=Rattus norvegicus OX=10116 GN=Cox6a2 PE=3 SV=1
20	313	tr|D3ZZ21|D3ZZ21_RAT	133.85	40	40	5495000	10	10	31	Oxidation (M)	15638	NADH dehydrogenase (Ubiquinone) 1 beta subcomplex 6 (Predicted) OS=Rattus norvegicus OX=10116 GN=Ndufb6 PE=1 SV=1
52	139	tr|Q06QG6|Q06QG6_RAT	132.64	5	5	3146900	9	9	12		68588	NADH-ubiquinone oxidoreductase chain 5 OS=Rattus norvegicus OX=10116 GN=ND5 PE=3 SV=1
52	137	tr|Q06QK5|Q06QK5_RAT	132.64	5	5	3146900	9	9	12		68606	NADH-ubiquinone oxidoreductase chain 5 OS=Rattus norvegicus OX=10116 GN=ND5 PE=3 SV=1
52	138	P11661|NU5M_RAT	132.64	5	5	3146900	9	9	12		68618	NADH-ubiquinone oxidoreductase chain 5 OS=Rattus norvegicus OX=10116 GN=Mtnd5 PE=3 SV=3
52	140	tr|Q06QA1|Q06QA1_RAT	132.64	5	5	3146900	9	9	12		68574	NADH-ubiquinone oxidoreductase chain 5 OS=Rattus norvegicus OX=10116 GN=ND5 PE=3 SV=1
52	141	tr|Q8SEZ0|Q8SEZ0_RAT	132.64	5	5	3146900	9	9	12		68618	NADH-ubiquinone oxidoreductase chain 5 OS=Rattus norvegicus OX=10116 GN=Mt-nd5 PE=3 SV=1
52	142	tr|A0A096XKT9|A0A096XKT9_RAT	132.64	5	5	3146900	9	9	12		68584	NADH-ubiquinone oxidoreductase chain 5 OS=Rattus norvegicus OX=10116 GN=ND5 PE=3 SV=1
52	164	tr|A7XYD5|A7XYD5_RAT	132.64	5	5	3146900	9	9	12		68856	NADH-ubiquinone oxidoreductase chain 5 OS=Rattus norvegicus OX=10116 GN=Nd5 PE=3 SV=1
52	165	tr|A7XYC1|A7XYC1_RAT	132.64	5	5	3146900	9	9	12		68841	NADH-ubiquinone oxidoreductase chain 5 OS=Rattus norvegicus OX=10116 GN=Nd5 PE=3 SV=1
52	166	tr|A0A0A1FZN8|A0A0A1FZN8_RAT	132.64	5	5	3146900	9	9	12		68970	NADH-ubiquinone oxidoreductase chain 5 OS=Rattus norvegicus OX=10116 GN=ND5 PE=3 SV=1
32	46	P09605|KCRS_RAT	131.78	16	16	1585800	10	10	19		47385	Creatine kinase S-type mitochondrial OS=Rattus norvegicus OX=10116 GN=Ckmt2 PE=1 SV=2
50	30	tr|Q5BJZ3|Q5BJZ3_RAT	131.23	4	4	1956600	6	6	13	Oxidation (M)	113869	Nicotinamide nucleotide transhydrogenase OS=Rattus norvegicus OX=10116 GN=Nnt PE=1 SV=1
57	44	P17764|THIL_RAT	130.29	12	12	1609000	6	6	10		44695	Acetyl-CoA acetyltransferase mitochondrial OS=Rattus norvegicus OX=10116 GN=Acat1 PE=1 SV=1
33	172	tr|D4A0T0|D4A0T0_RAT	129.62	16	16	11418000	6	6	19		20859	NADH:ubiquinone oxidoreductase subunit B10 OS=Rattus norvegicus OX=10116 GN=Ndufb10 PE=1 SV=1
43	76	Q06647|ATPO_RAT	126.78	13	13	2845200	8	8	15		23398	ATP synthase subunit O mitochondrial OS=Rattus norvegicus OX=10116 GN=Atp5po PE=1 SV=1
51	219	tr|D3ZS58|D3ZS58_RAT	125.75	19	19	1417900	6	6	13		10845	NADH dehydrogenase [ubiquinone] 1 alpha subcomplex subunit 2 OS=Rattus norvegicus OX=10116 GN=Ndufa2 PE=1 SV=1
64	61	Q63704|CPT1B_RAT	121.35	4	4	987690	4	4	8		88217	Carnitine O-palmitoyltransferase 1 muscle isoform OS=Rattus norvegicus OX=10116 GN=Cpt1b PE=1 SV=1
59	56	tr|F1LPG5|F1LPG5_RAT	119.89	21	21	3637200	6	6	10		15064	NADH:ubiquinone oxidoreductase subunit B4 OS=Rattus norvegicus OX=10116 GN=Ndufb4 PE=1 SV=1
59	57	tr|F1M7T1|F1M7T1_RAT	119.89	21	21	3637200	6	6	10		15160	NADH dehydrogenase (ubiquinone) 1 beta subcomplex 4 OS=Rattus norvegicus OX=10116 GN=LOC100361934 PE=4 SV=2
46	169	tr|A9UMV9|A9UMV9_RAT	119.02	21	21	10018000	4	4	15		12500	NADH:ubiquinone oxidoreductase subunit A7 OS=Rattus norvegicus OX=10116 GN=Ndufa7 PE=1 SV=1
28	168	P19511|AT5F1_RAT	118.26	9	9	13653000	6	6	21		28869	ATP synthase F(0) complex subunit B1 mitochondrial OS=Rattus norvegicus OX=10116 GN=Atp5pb PE=1 SV=1
58	318	Q5M9I5|QCR6_RAT	118.08	18	18	4250800	5	5	10		10424	Cytochrome b-c1 complex subunit 6 mitochondrial OS=Rattus norvegicus OX=10116 GN=Uqcrh PE=3 SV=1
40	49	Q5BK63|NDUA9_RAT	115.68	18	18	2411700	10	10	16		42559	NADH dehydrogenase [ubiquinone] 1 alpha subcomplex subunit 9 mitochondrial OS=Rattus norvegicus OX=10116 GN=Ndufa9 PE=1 SV=2
61	199	tr|B0BNE6|B0BNE6_RAT	115.53	9	9	1735200	5	5	10		23970	NADH dehydrogenase (Ubiquinone) Fe-S protein 8 (Predicted) isoform CRA_a OS=Rattus norvegicus OX=10116 GN=Ndufs8 PE=1 SV=1
85	3941	P10818|CX6A1_RAT	114.46	21	21	205360	5	3	5	Oxidation (M)	12301	Cytochrome c oxidase subunit 6A1 mitochondrial OS=Rattus norvegicus OX=10116 GN=Cox6a1 PE=1 SV=2
29	80	tr|Q5XIH3|Q5XIH3_RAT	110.16	11	11	3117400	11	11	21		50731	NADH dehydrogenase [ubiquinone] flavoprotein 1 mitochondrial OS=Rattus norvegicus OX=10116 GN=Ndufv1 PE=1 SV=1
69	4293	P52873|PYC_RAT	105.37	6	6	272700	7	5	8	Formylation	129777	Pyruvate carboxylase mitochondrial OS=Rattus norvegicus OX=10116 GN=Pc PE=1 SV=2
69	4294	tr|A0A0G2JTL5|A0A0G2JTL5_RAT	105.37	5	5	272700	7	5	8	Formylation	140005	Pyruvate carboxylase mitochondrial OS=Rattus norvegicus OX=10116 GN=Pc PE=1 SV=1
42	263	P35171|CX7A2_RAT	105.29	12	12	1489500	3	3	16		9353	Cytochrome c oxidase subunit 7A2 mitochondrial OS=Rattus norvegicus OX=10116 GN=Cox7a2 PE=1 SV=1
42	264	tr|B2RYS0|B2RYS0_RAT	105.29	12	12	1489500	3	3	16		9353	Cox7a2 protein OS=Rattus norvegicus OX=10116 GN=Cox7a2 PE=2 SV=1
53	1021	tr|Q06QA9|Q06QA9_RAT	104.02	9	9	1117500	8	8	12	Carbamidomethylation	56893	Cytochrome c oxidase subunit 1 OS=Rattus norvegicus OX=10116 GN=CO1 PE=3 SV=1
53	1022	tr|Q06QK0|Q06QK0_RAT	104.02	9	9	1117500	8	8	12	Carbamidomethylation	56880	Cytochrome c oxidase subunit 1 OS=Rattus norvegicus OX=10116 GN=CO1 PE=3 SV=1
53	1023	tr|Q8SEZ6|Q8SEZ6_RAT	104.02	9	9	1117500	8	8	12	Carbamidomethylation	56879	Cytochrome c oxidase subunit 1 OS=Rattus norvegicus OX=10116 GN=COI PE=3 SV=1
53	1024	tr|A0A0A1FZ34|A0A0A1FZ34_RAT	104.02	9	9	1117500	8	8	12	Carbamidomethylation	56937	Cytochrome c oxidase subunit 1 OS=Rattus norvegicus OX=10116 GN=COX1 PE=3 SV=1
53	1025	tr|Q8HIC9|Q8HIC9_RAT	104.02	9	9	1117500	8	8	12	Carbamidomethylation	56845	Cytochrome c oxidase subunit 1 OS=Rattus norvegicus OX=10116 GN=Mt-co1 PE=3 SV=1
53	1026	P05503|COX1_RAT	104.02	9	9	1117500	8	8	12	Carbamidomethylation	56845	Cytochrome c oxidase subunit 1 OS=Rattus norvegicus OX=10116 GN=Mtco1 PE=2 SV=3
53	1027	tr|Q95938|Q95938_RAT	104.02	9	9	1117500	8	8	12	Carbamidomethylation	56977	Cytochrome c oxidase subunit 1 OS=Rattus norvegicus OX=10116 GN=Co I PE=3 SV=1
45	398	tr|B2RYT5|B2RYT5_RAT	102.9	32	32	2733200	9	9	15	Oxidation (M)	12651	Cox7a2l protein OS=Rattus norvegicus OX=10116 GN=Cox7a2l PE=2 SV=1
45	399	tr|D3ZYX8|D3ZYX8_RAT	102.9	30	30	2733200	9	9	15	Oxidation (M)	13274	Cytochrome c oxidase subunit 7A2-like OS=Rattus norvegicus OX=10116 GN=Cox7a2l PE=1 SV=1
79	48	Q4V8F9|HSDL2_RAT	100.07	8	8	807170	4	4	5		58344	Hydroxysteroid dehydrogenase-like protein 2 OS=Rattus norvegicus OX=10116 GN=Hsdl2 PE=2 SV=1
56	292	P10888|COX41_RAT	99.64	24	24	1067100	9	9	11	Oxidation (M)	19515	Cytochrome c oxidase subunit 4 isoform 1 mitochondrial OS=Rattus norvegicus OX=10116 GN=Cox4i1 PE=1 SV=1
72	301	Q5FVQ8|NLRX1_RAT	97.91	4	4	494700	5	4	7		107590	NLR family member X1 OS=Rattus norvegicus OX=10116 GN=Nlrx1 PE=2 SV=1
76	18	P26284|ODPA_RAT	97.7	7	7	1067200	4	4	6		43227	Pyruvate dehydrogenase E1 component subunit alpha somatic form mitochondrial OS=Rattus norvegicus OX=10116 GN=Pdha1 PE=1 SV=2
38	75	Q6PDU7|ATP5L_RAT	94.42	22	22	2668300	8	8	16		11433	ATP synthase subunit g mitochondrial OS=Rattus norvegicus OX=10116 GN=Atp5mg PE=1 SV=2
41	267	tr|I6V4L9|I6V4L9_RAT	91.98	11	11	1118400	5	5	16	Oxidation (M)	29844	Cytochrome c oxidase subunit 3 OS=Rattus norvegicus OX=10116 GN=COX3 PE=3 SV=1
54	532	P67779|PHB_RAT	88.85	17	17	513830	8	8	12		29820	Prohibitin OS=Rattus norvegicus OX=10116 GN=Phb PE=1 SV=1
93	3906	tr|D3ZCZ9|D3ZCZ9_RAT	87.47	16	16	541380	3	3	4		13040	NADH dehydrogenase [ubiquinone] iron-sulfur protein 6 mitochondrial OS=Rattus norvegicus OX=10116 GN=LOC100912599 PE=1 SV=1
71	233	tr|Q5UAJ5|Q5UAJ5_RAT	86.48	19	19	4073800	3	3	7	Oxidation (M)	7642	ATP synthase protein 8 OS=Rattus norvegicus OX=10116 GN=ATP8 PE=3 SV=1
71	234	P11608|ATP8_RAT	86.48	19	19	4073800	3	3	7	Oxidation (M)	7630	ATP synthase protein 8 OS=Rattus norvegicus OX=10116 GN=Mt-atp8 PE=1 SV=2
71	235	tr|Q8SEZ4|Q8SEZ4_RAT	86.48	19	19	4073800	3	3	7	Oxidation (M)	7632	ATP synthase protein 8 OS=Rattus norvegicus OX=10116 GN=ATPase8 PE=3 SV=1
71	236	tr|Q8HIC8|Q8HIC8_RAT	86.48	19	19	4073800	3	3	7	Oxidation (M)	7630	ATP synthase protein 8 OS=Rattus norvegicus OX=10116 GN=Mt-atp8 PE=3 SV=1
75	152	Q8VHF5|CISY_RAT	81.78	5	5	708720	5	5	6		51867	Citrate synthase mitochondrial OS=Rattus norvegicus OX=10116 GN=Cs PE=1 SV=1
75	153	tr|G3V936|G3V936_RAT	81.78	5	5	708720	5	5	6		51831	Citrate synthase OS=Rattus norvegicus OX=10116 GN=Cs PE=1 SV=1
78	315	tr|G3V7I0|G3V7I0_RAT	81.76	12	12	1100900	3	3	6		28299	Peroxiredoxin 3 OS=Rattus norvegicus OX=10116 GN=Prdx3 PE=1 SV=1
78	316	Q9Z0V6|PRDX3_RAT	81.76	12	12	1100900	3	3	6		28295	Thioredoxin-dependent peroxide reductase mitochondrial OS=Rattus norvegicus OX=10116 GN=Prdx3 PE=1 SV=2
66	273	P04636|MDHM_RAT	81.68	9	9	504190	5	5	8		35684	Malate dehydrogenase mitochondrial OS=Rattus norvegicus OX=10116 GN=Mdh2 PE=1 SV=2
77	335	Q5XIH7|PHB2_RAT	81.4	9	9	1782800	4	4	6		33312	Prohibitin-2 OS=Rattus norvegicus OX=10116 GN=Phb2 PE=1 SV=1
63	72	tr|D3ZE15|D3ZE15_RAT	80.33	32	32	698460	6	6	9	Oxidation (M)	16777	NADH:ubiquinone oxidoreductase subunit A13 OS=Rattus norvegicus OX=10116 GN=Ndufa13 PE=1 SV=1
73	827	tr|D4A3V2|D4A3V2_RAT	79.44	8	8	809870	4	4	7		15224	NADH dehydrogenase [ubiquinone] 1 alpha subcomplex subunit 6 OS=Rattus norvegicus OX=10116 GN=Ndufa6 PE=1 SV=1
67	207	P11951|CX6C2_RAT	79.4	26	26	638460	5	5	8	Oxidation (M)	8455	Cytochrome c oxidase subunit 6C-2 OS=Rattus norvegicus OX=10116 GN=Cox6c2 PE=1 SV=3
87	296	tr|F1LP30|F1LP30_RAT	75.63	3	3	78389	2	1	4		79296	Methylcrotonoyl-CoA carboxylase subunit alpha mitochondrial OS=Rattus norvegicus OX=10116 GN=Mccc1 PE=1 SV=1
87	297	Q5I0C3|MCCA_RAT	75.63	3	3	78389	2	1	4		79330	Methylcrotonoyl-CoA carboxylase subunit alpha mitochondrial OS=Rattus norvegicus OX=10116 GN=Mccc1 PE=1 SV=1
60	47	P18163|ACSL1_RAT	75.55	5	5	812180	5	4	10	Carbamidomethylation		Long-chain-fatty-acid--CoA ligase 1
84	238	Q5XIF3|NDUS4_RAT	74.92	12	12	839700	3	3	5		19741	NADH dehydrogenase [ubiquinone] iron-sulfur protein 4 mitochondrial OS=Rattus norvegicus OX=10116 GN=Ndufs4 PE=1 SV=1
70	209	tr|B2RZD6|B2RZD6_RAT	74.74	21	21	2124300	4	4	7		9327	NDUFA4 mitochondrial complex-associated OS=Rattus norvegicus OX=10116 GN=Ndufa4 PE=1 SV=1
55	170	tr|Q6P6W6|Q6P6W6_RAT	72.91	16	16	1236400	6	6	12		31701	NADH dehydrogenase [ubiquinone] 1 alpha subcomplex subunit 10 mitochondrial OS=Rattus norvegicus OX=10116 GN=Ndufa10 PE=2 SV=1
55	171	Q561S0|NDUAA_RAT	72.91	13	13	1236400	6	6	12		40493	NADH dehydrogenase [ubiquinone] 1 alpha subcomplex subunit 10 mitochondrial OS=Rattus norvegicus OX=10116 GN=Ndufa10 PE=1 SV=1
62	3901	tr|Q8SEZ8|Q8SEZ8_RAT	71.94	6	6	1860700	5	5	9		36133	NADH-ubiquinone oxidoreductase chain 1 (Fragment) OS=Rattus norvegicus OX=10116 GN=NADH1 PE=3 SV=1
62	3902	P03889|NU1M_RAT	71.94	6	6	1860700	5	5	9		36145	NADH-ubiquinone oxidoreductase chain 1 OS=Rattus norvegicus OX=10116 GN=Mtnd1 PE=1 SV=3
62	3903	tr|Q8HID1|Q8HID1_RAT	71.94	6	6	1860700	5	5	9		36145	NADH-ubiquinone oxidoreductase chain 1 OS=Rattus norvegicus OX=10116 GN=Mt-nd1 PE=3 SV=1
62	3904	tr|D2E6L7|D2E6L7_RAT	71.94	6	6	1860700	5	5	9		36062	NADH-ubiquinone oxidoreductase chain 1 OS=Rattus norvegicus OX=10116 GN=ND1 PE=3 SV=1
106	3930	tr|Q35733|Q35733_RAT	67.62	13	13	177320	2	2	3		8389	NADH-ubiquinone oxidoreductase chain 6 (Fragment) OS=Rattus norvegicus OX=10116 PE=3 SV=1
106	3921	tr|Q06QD9|Q06QD9_RAT	67.62	6	6	177320	2	2	3		18943	NADH-ubiquinone oxidoreductase chain 6 OS=Rattus norvegicus OX=10116 GN=ND6 PE=3 SV=1
106	3922	tr|Q7HKW2|Q7HKW2_RAT	67.62	6	6	177320	2	2	3		18957	NADH-ubiquinone oxidoreductase chain 6 OS=Rattus norvegicus OX=10116 GN=NADH6 PE=3 SV=1
99	4	P08461|ODP2_RAT	63.83	3	3	461560	3	3	3		67166	Dihydrolipoyllysine-residue acetyltransferase component of pyruvate dehydrogenase complex mitochondrial OS=Rattus norvegicus OX=10116 GN=Dlat PE=1 SV=3
161	245	tr|C8CHS6|C8CHS6_RAT	63.48	15	15	118440	1	1	1		7988	Mitochondrial superoxide dismutase 2 (Fragment) OS=Rattus norvegicus OX=10116 PE=2 SV=1
161	71	P07895|SODM_RAT	63.48	5	5	118440	1	1	1		24674	Superoxide dismutase [Mn] mitochondrial OS=Rattus norvegicus OX=10116 GN=Sod2 PE=1 SV=2
68	3899	tr|B5DEL8|B5DEL8_RAT	63.31	21	21	644680	4	4	8		12700	NADH dehydrogenase (Ubiquinone) Fe-S protein 5 OS=Rattus norvegicus OX=10116 GN=Ndufs5 PE=1 SV=1
68	3900	tr|A0A0G2JZJ9|A0A0G2JZJ9_RAT	63.31	21	21	644680	4	4	8		12730	Uncharacterized protein OS=Rattus norvegicus OX=10116 PE=4 SV=1
96	8042	tr|Q4G067|Q4G067_RAT	62.48	4	4	160600	3	3	4		37440	Mitochondrial ribosomal protein L44 OS=Rattus norvegicus OX=10116 GN=Mrpl44 PE=1 SV=1
92	144	P13086|SUCA_RAT	59.66	7	7	115040	3	3	4		36148	Succinate--CoA ligase [ADP/GDP-forming] subunit alpha mitochondrial OS=Rattus norvegicus OX=10116 GN=Suclg1 PE=2 SV=2
92	145	tr|A0A0H2UHE1|A0A0H2UHE1_RAT	59.66	7	7	115040	3	3	4		37560	Succinate--CoA ligase [ADP/GDP-forming] subunit alpha mitochondrial OS=Rattus norvegicus OX=10116 GN=Suclg1 PE=1 SV=1
113	73	Q63362|NDUA5_RAT	58.4	9	9	239700	2	2	2		13412	NADH dehydrogenase [ubiquinone] 1 alpha subcomplex subunit 5 OS=Rattus norvegicus OX=10116 GN=Ndufa5 PE=1 SV=3
83	326	Q91XJ1|BECN1_RAT	54.38	3	3		3	0	5		51557	Beclin-1 OS=Rattus norvegicus OX=10116 GN=Becn1 PE=1 SV=1
94	400	Q704S8|CACP_RAT	53.12	3	3	152480	2	2	4		70801	Carnitine O-acetyltransferase OS=Rattus norvegicus OX=10116 GN=Crat PE=1 SV=1
94	401	tr|A0A0H2UI21|A0A0H2UI21_RAT	53.12	3	3	152480	2	2	4		71014	Carnitine O-acetyltransferase OS=Rattus norvegicus OX=10116 GN=Crat PE=1 SV=1
86	3893	tr|B2RYS2|B2RYS2_RAT	52.63	24	24	1352200	4	4	4		13559	Cytochrome b-c1 complex subunit 7 OS=Rattus norvegicus OX=10116 GN=Uqcrb PE=1 SV=1
80	66	P56574|IDHP_RAT	52.23	7	7	270550	4	4	5		50967	Isocitrate dehydrogenase [NADP] mitochondrial OS=Rattus norvegicus OX=10116 GN=Idh2 PE=1 SV=2
74	208	Q7TQ16|QCR8_RAT	51.71	20	20	1297800	4	4	6		9849	Cytochrome b-c1 complex subunit 8 OS=Rattus norvegicus OX=10116 GN=Uqcrq PE=3 SV=1
162	15874	tr|M0R5K3|M0R5K3_RAT	49.53	11	11	91212	1	1	1		9028	Cytochrome c oxidase subunit 7A1 OS=Rattus norvegicus OX=10116 GN=LOC687508 PE=4 SV=1
91	4412	Q02253|MMSA_RAT	49.42	8	8	207660	4	4	4	Oxidation (M)	57808	Methylmalonate-semialdehyde dehydrogenase [acylating] mitochondrial OS=Rattus norvegicus OX=10116 GN=Aldh6a1 PE=1 SV=1
91	4413	tr|G3V7J0|G3V7J0_RAT	49.42	8	8	207660	4	4	4	Oxidation (M)	57748	Aldehyde dehydrogenase family 6 subfamily A1 isoform CRA_b OS=Rattus norvegicus OX=10116 GN=Aldh6a1 PE=1 SV=1
81	467	tr|D4A4P3|D4A4P3_RAT	48.34	22	22	797970	3	3	5	Oxidation (M)	11267	NADH:ubiquinone oxidoreductase subunit B3 OS=Rattus norvegicus OX=10116 GN=Ndufb3 PE=1 SV=1
88	319	P29419|ATP5I_RAT	46.66	21	21	369600	2	2	4		8255	ATP synthase subunit e mitochondrial OS=Rattus norvegicus OX=10116 GN=Atp5me PE=1 SV=3
98	159	tr|Q5U1W6|Q5U1W6_RAT	45.27	12	12	396200	2	2	3		28238	MICOS complex subunit OS=Rattus norvegicus OX=10116 GN=Apool PE=1 SV=1
104	78	Q920L2|SDHA_RAT	41.59	3	3	126280	2	2	3		71615	Succinate dehydrogenase [ubiquinone] flavoprotein subunit mitochondrial OS=Rattus norvegicus OX=10116 GN=Sdha PE=1 SV=1
65	151	P12075|COX5B_RAT	40.77	9	9	2339600	3	3	8		13915	Cytochrome c oxidase subunit 5B mitochondrial OS=Rattus norvegicus OX=10116 GN=Cox5b PE=1 SV=2
110	23	tr|Q6P9Y4|Q6P9Y4_RAT	40.63	5	5	166200	2	2	2		32904	ADP/ATP translocase 1 OS=Rattus norvegicus OX=10116 GN=Slc25a4 PE=1 SV=1
110	24	Q05962|ADT1_RAT	40.63	5	5	166200	2	2	2		32989	ADP/ATP translocase 1 OS=Rattus norvegicus OX=10116 GN=Slc25a4 PE=1 SV=3
110	27	Q09073|ADT2_RAT	40.63	5	5	166200	2	2	2		32901	ADP/ATP translocase 2 OS=Rattus norvegicus OX=10116 GN=Slc25a5 PE=1 SV=3
110	43	tr|D3ZB81|D3ZB81_RAT	40.63	5	5	166200	2	2	2		35227	Solute carrier family 25 member 31 OS=Rattus norvegicus OX=10116 GN=Slc25a31 PE=3 SV=3
111	3914	tr|B2RYU0|B2RYU0_RAT	39.33	21	21	712940	2	2	2		11842	NADH dehydrogenase (Ubiquinone) 1 beta subcomplex 2 (Predicted) isoform CRA_b OS=Rattus norvegicus OX=10116 GN=Ndufb2 PE=1 SV=1
95	3951	tr|B1WBP7|B1WBP7_RAT	39.1	13	13	380600	2	2	4		12884	ATP synthase subunit delta mitochondrial OS=Rattus norvegicus OX=10116 GN=Atp5f1d PE=1 SV=1
95	3953	tr|G3V7Y3|G3V7Y3_RAT	39.1	10	10	380600	2	2	4		17563	ATP synthase subunit delta mitochondrial OS=Rattus norvegicus OX=10116 GN=Atp5f1d PE=1 SV=1
82	3923	P80431|COX7B_RAT	39.07	24	24	326510	3	3	5		8995	Cytochrome c oxidase subunit 7B mitochondrial OS=Rattus norvegicus OX=10116 GN=Cox7b PE=1 SV=3
163	15875	tr|F1LWG4|F1LWG4_RAT	38.24	4	4	274370	1	1	1		37782	NADH dehydrogenase (Ubiquinone) 1 alpha subcomplex assembly factor 1 (Predicted) isoform CRA_a OS=Rattus norvegicus OX=10116 GN=Ndufaf1 PE=1 SV=2
105	215	P33124|ACSL6_RAT	38.05	2	2	0	2	1	3	Carbamidomethylation	78180	Long-chain-fatty-acid--CoA ligase 6 OS=Rattus norvegicus OX=10116 GN=Acsl6 PE=1 SV=1
117	343	Q924S5|LONM_RAT	36.69	1	1	64076	1	1	2		105792	Lon protease homolog mitochondrial OS=Rattus norvegicus OX=10116 GN=Lonp1 PE=2 SV=1
107	310	Q75Q40|TOM40_RAT	36.13	4	4	256960	1	1	3		37919	Mitochondrial import receptor subunit TOM40 homolog OS=Rattus norvegicus OX=10116 GN=Tomm40 PE=1 SV=1
107	311	tr|G3V8F5|G3V8F5_RAT	36.13	4	4	256960	1	1	3		37920	Mitochondrial import receptor subunit TOM40 homolog OS=Rattus norvegicus OX=10116 GN=Tomm40 PE=1 SV=1
164	3934	Q66H47|RM24_RAT	34.79	6	6	73795	1	1	1		25001	39S ribosomal protein L24 mitochondrial OS=Rattus norvegicus OX=10116 GN=Mrpl24 PE=2 SV=1
165	23059	Q5I0I4|DMAC2_RAT	32.87	6	6	68340	1	1	1		28508	Distal membrane-arm assembly complex protein 2 OS=Rattus norvegicus OX=10116 GN=Dmac2 PE=2 SV=1
118	3985	tr|Q5XFW4|Q5XFW4_RAT	32.7	7	7	25551	1	1	2		20541	Mitochondrial ribosomal protein L13 OS=Rattus norvegicus OX=10116 GN=Mrpl13 PE=1 SV=1
141	8319	Q9WVK7|HCDH_RAT	32.24	5	5	35418	1	1	1	Oxidation (M)	34448	Hydroxyacyl-coenzyme A dehydrogenase mitochondrial OS=Rattus norvegicus OX=10116 GN=Hadh PE=2 SV=1
89	256	tr|Q8M7G5|Q8M7G5_RAT	31.21	8	8	172150	2	2	4	Oxidation (M)	24240	ATP synthase subunit a (Fragment) OS=Rattus norvegicus OX=10116 PE=2 SV=1
89	257	tr|Q549I0|Q549I0_RAT	31.21	8	8	172150	2	2	4	Oxidation (M)	25050	ATP synthase subunit a OS=Rattus norvegicus OX=10116 GN=atp6 PE=4 SV=1
89	258	P05504|ATP6_RAT	31.21	8	8	172150	2	2	4	Oxidation (M)	25076	ATP synthase subunit a OS=Rattus norvegicus OX=10116 GN=Mt-atp6 PE=1 SV=3
89	259	tr|Q8HIC7|Q8HIC7_RAT	31.21	8	8	172150	2	2	4	Oxidation (M)	25076	ATP synthase subunit a OS=Rattus norvegicus OX=10116 GN=Mt-atp6 PE=4 SV=1
89	260	tr|S5S1E9|S5S1E9_RAT	31.21	8	8	172150	2	2	4	Oxidation (M)	25049	ATP synthase subunit a OS=Rattus norvegicus OX=10116 GN=ATP6 PE=4 SV=1
89	262	tr|Q8SEZ3|Q8SEZ3_RAT	31.21	8	8	172150	2	2	4	Oxidation (M)	25030	ATP synthase subunit a OS=Rattus norvegicus OX=10116 GN=ATPase6 PE=4 SV=1
119	1037	Q08877|DYN3_RAT	30.88	1	1	119120	1	1	2		97914	Dynamin-3 OS=Rattus norvegicus OX=10116 GN=Dnm3 PE=1 SV=2
101	376	tr|Q5RJN0|Q5RJN0_RAT	30.79	8	8	683800	2	2	3		23945	NADH dehydrogenase (Ubiquinone) Fe-S protein 7 OS=Rattus norvegicus OX=10116 GN=Ndufs7 PE=1 SV=1
149	79	tr|D3ZUX5|D3ZUX5_RAT	30.11	4	4	51371	1	1	1		26435	MICOS complex subunit OS=Rattus norvegicus OX=10116 GN=Chchd3 PE=1 SV=1
116	4487	tr|D4A4B1|D4A4B1_RAT	29.17	6	6	91332	2	2	2		23223	Mitochondrial ribosomal protein L15 OS=Rattus norvegicus OX=10116 GN=Mrpl15 PE=1 SV=2
116	4488	tr|A0A0G2K9B4|A0A0G2K9B4_RAT	29.17	4	4	91332	2	2	2		33652	Mitochondrial ribosomal protein L15 OS=Rattus norvegicus OX=10116 GN=Mrpl15 PE=1 SV=1
114	3919	tr|A9UMV7|A9UMV7_RAT	29.05	11	11	115030	1	1	2		6539	RCG29512 OS=Rattus norvegicus OX=10116 GN=Uqcr11 PE=1 SV=1
166	3932	tr|D3ZD09|D3ZD09_RAT	28.7	12	12	86487	1	1	1		10071	Cytochrome c oxidase subunit OS=Rattus norvegicus OX=10116 GN=Cox6b1 PE=1 SV=1
167	384	tr|Q06Q97|Q06Q97_RAT	28.64	2	2	102520	1	1	1		38485	NADH-ubiquinone oxidoreductase chain 2 OS=Rattus norvegicus OX=10116 GN=ND2 PE=3 SV=1
167	385	tr|A0A0A1G491|A0A0A1G491_RAT	28.64	2	2	102520	1	1	1		38542	NADH-ubiquinone oxidoreductase chain 2 OS=Rattus norvegicus OX=10116 GN=ND2 PE=3 SV=1
167	386	tr|Q5UAJ8|Q5UAJ8_RAT	28.64	2	2	102520	1	1	1		38455	NADH-ubiquinone oxidoreductase chain 2 OS=Rattus norvegicus OX=10116 GN=ND2 PE=3 SV=1
167	388	tr|Q8HID0|Q8HID0_RAT	28.64	2	2	102520	1	1	1		38653	NADH-ubiquinone oxidoreductase chain 2 OS=Rattus norvegicus OX=10116 GN=Mt-nd2 PE=3 SV=1
167	389	P11662|NU2M_RAT	28.64	2	2	102520	1	1	1		38653	NADH-ubiquinone oxidoreductase chain 2 OS=Rattus norvegicus OX=10116 GN=Mtnd2 PE=3 SV=3
167	390	tr|Q06QH5|Q06QH5_RAT	28.64	2	2	102520	1	1	1		38626	NADH-ubiquinone oxidoreductase chain 2 OS=Rattus norvegicus OX=10116 GN=ND2 PE=3 SV=1
167	391	tr|Q8SEZ7|Q8SEZ7_RAT	28.64	2	2	102520	1	1	1		38580	NADH-ubiquinone oxidoreductase chain 2 (Fragment) OS=Rattus norvegicus OX=10116 GN=NADH2 PE=3 SV=1
167	392	tr|Q06QB0|Q06QB0_RAT	28.64	2	2	102520	1	1	1		38534	NADH-ubiquinone oxidoreductase chain 2 OS=Rattus norvegicus OX=10116 GN=ND2 PE=3 SV=1
167	393	tr|D2E6P4|D2E6P4_RAT	28.64	2	2	102520	1	1	1		38623	NADH-ubiquinone oxidoreductase chain 2 OS=Rattus norvegicus OX=10116 GN=ND2 PE=3 SV=1
167	394	tr|Q06QE9|Q06QE9_RAT	28.64	2	2	102520	1	1	1		38598	NADH-ubiquinone oxidoreductase chain 2 OS=Rattus norvegicus OX=10116 GN=ND2 PE=3 SV=1
100	344	tr|D4A4K4|D4A4K4_RAT	28.43	0	0	1483800	2	2	3		418626	Vacuolar protein sorting 13 homolog C OS=Rattus norvegicus OX=10116 GN=Vps13c PE=1 SV=2
148	12037	P21571|ATP5J_RAT	26.73	9	9	26930	1	1	1		12494	ATP synthase-coupling factor 6 mitochondrial OS=Rattus norvegicus OX=10116 GN=Atp5pf PE=1 SV=1
169	8178	tr|D4A9Z6|D4A9Z6_RAT	26.51	2	2	102520	1	1	1		36207	Mitochondrial ribosomal protein S35 OS=Rattus norvegicus OX=10116 GN=Mrps35 PE=1 SV=1
120	474	tr|F1LN92|F1LN92_RAT	25.3	2	2	115510	2	2	2		89352	AFG3-like matrix AAA peptidase subunit 2 OS=Rattus norvegicus OX=10116 GN=Afg3l2 PE=1 SV=1
108	3917	tr|D3ZJG4|D3ZJG4_RAT	25.09	1	1	260560	1	1	3	Oxidation (M)	95972	Phosphofurin acidic cluster sorting protein 2 OS=Rattus norvegicus OX=10116 GN=Pacs2 PE=1 SV=2
121	4158	P46462|TERA_RAT	24.78	1	1	152330	1	1	2		89349	Transitional endoplasmic reticulum ATPase OS=Rattus norvegicus OX=10116 GN=Vcp PE=1 SV=3
170	23060	P80433|COX8A_RAT	24.13	14	14	21449	1	1	1		7672	Cytochrome c oxidase subunit 8A mitochondrial OS=Rattus norvegicus OX=10116 GN=Cox8a PE=1 SV=3
143	16	P02563|MYH6_RAT	24.12	1	1	800020	1	1	1	Formylation	223506	Myosin-6 OS=Rattus norvegicus OX=10116 GN=Myh6 PE=1 SV=2
171	12335	tr|D3ZFJ6|D3ZFJ6_RAT	23.94	4	4	336360	1	1	1		60420	Lactamase beta OS=Rattus norvegicus OX=10116 GN=Lactb PE=1 SV=1
115	363	P05508|NU4M_RAT	23.45	2	2	79727	1	1	2		51783	NADH-ubiquinone oxidoreductase chain 4 OS=Rattus norvegicus OX=10116 GN=Mtnd4 PE=3 SV=3
115	364	tr|D2E6K0|D2E6K0_RAT	23.45	2	2	79727	1	1	2		51833	NADH-ubiquinone oxidoreductase chain 4 OS=Rattus norvegicus OX=10116 GN=ND4 PE=3 SV=1
115	365	tr|A7XYB9|A7XYB9_RAT	23.45	2	2	79727	1	1	2		51773	NADH-ubiquinone oxidoreductase chain 4 OS=Rattus norvegicus OX=10116 GN=Nd4 PE=3 SV=1
115	366	tr|Q06QE1|Q06QE1_RAT	23.45	2	2	79727	1	1	2		51851	NADH-ubiquinone oxidoreductase chain 4 OS=Rattus norvegicus OX=10116 GN=ND4 PE=3 SV=1
115	367	tr|Q06QA2|Q06QA2_RAT	23.45	2	2	79727	1	1	2		51787	NADH-ubiquinone oxidoreductase chain 4 OS=Rattus norvegicus OX=10116 GN=ND4 PE=3 SV=1
115	368	tr|Q7HKW3|Q7HKW3_RAT	23.45	2	2	79727	1	1	2		51801	NADH-ubiquinone oxidoreductase chain 4 (Fragment) OS=Rattus norvegicus OX=10116 GN=NADH4 PE=3 SV=1
115	369	tr|Q06QG7|Q06QG7_RAT	23.45	2	2	79727	1	1	2		51791	NADH-ubiquinone oxidoreductase chain 4 OS=Rattus norvegicus OX=10116 GN=ND4 PE=3 SV=1
115	370	tr|Q06Q89|Q06Q89_RAT	23.45	2	2	79727	1	1	2		51819	NADH-ubiquinone oxidoreductase chain 4 OS=Rattus norvegicus OX=10116 GN=ND4 PE=3 SV=1
115	371	tr|Q35737|Q35737_RAT	23.45	2	2	79727	1	1	2		51765	NADH-ubiquinone oxidoreductase chain 4 OS=Rattus norvegicus OX=10116 PE=3 SV=1
115	372	tr|Q8HIC6|Q8HIC6_RAT	23.45	2	2	79727	1	1	2		51783	NADH-ubiquinone oxidoreductase chain 4 OS=Rattus norvegicus OX=10116 GN=Mt-nd4 PE=3 SV=1
122	19471	Q75Q41|TOM22_RAT	23.29	8	8	128190	1	1	2		15491	Mitochondrial import receptor subunit TOM22 homolog OS=Rattus norvegicus OX=10116 GN=Tomm22 PE=1 SV=1
109	1269	Q5M934|TRUB1_RAT	22.59	2	2	1654200	1	1	2		36404	Probable tRNA pseudouridine synthase 1 OS=Rattus norvegicus OX=10116 GN=Trub1 PE=2 SV=1
174	19460	tr|D3ZMR9|D3ZMR9_RAT	22.46	4	4	67418	1	1	1		23390	Mitochondrial ribosomal protein L21 OS=Rattus norvegicus OX=10116 GN=Mrpl21 PE=1 SV=1
142	13	P49432|ODPB_RAT	21.9	3	3	92615	1	1	1		38982	Pyruvate dehydrogenase E1 component subunit beta mitochondrial OS=Rattus norvegicus OX=10116 GN=Pdhb PE=1 SV=2
142	15	tr|A0A0G2KAM3|A0A0G2KAM3_RAT	21.9	2	2	92615	1	1	1		46193	Pyruvate dehydrogenase E1 component subunit beta OS=Rattus norvegicus OX=10116 GN=Pdhb PE=1 SV=1
127	524	tr|D4A054|D4A054_RAT	21.54	0	0	2733500	1	1	1		341403	RAN-binding protein 2 OS=Rattus norvegicus OX=10116 GN=Ranbp2 PE=1 SV=2
127	525	tr|M0R3M4|M0R3M4_RAT	21.54	0	0	2733500	1	1	1		344396	RAN-binding protein 2 OS=Rattus norvegicus OX=10116 GN=Ranbp2 PE=1 SV=1
176	12109	Q6SKG1|ACSM3_RAT	21.3	1	1	558980	1	1	1	Formylation	65713	Acyl-coenzyme A synthetase ACSM3 mitochondrial OS=Rattus norvegicus OX=10116 GN=Acsm3 PE=2 SV=1
128	738	tr|A0A0G2K1F2|A0A0G2K1F2_RAT	21.17	0	0		1	0	1		276393	Acetyl-CoA carboxylase beta OS=Rattus norvegicus OX=10116 GN=Acacb PE=1 SV=1
128	739	tr|D3ZBE2|D3ZBE2_RAT	21.17	0	0		1	0	1		275967	Acetyl-CoA carboxylase beta OS=Rattus norvegicus OX=10116 GN=Acacb PE=1 SV=3
128	740	tr|E9PSQ0|E9PSQ0_RAT	21.17	0	0		1	0	1		276255	Acetyl-CoA carboxylase beta OS=Rattus norvegicus OX=10116 GN=Acacb PE=1 SV=2
128	426	tr|O70151|O70151_RAT	21.17	0	0		1	0	1		276097	Acetyl-CoA carboxylase OS=Rattus norvegicus OX=10116 GN=Acacb PE=2 SV=1
128	737	tr|A0A0G2K5L6|A0A0G2K5L6_RAT	21.17	0	0		1	0	1		275755	Acetyl-CoA carboxylase beta OS=Rattus norvegicus OX=10116 GN=Acacb PE=1 SV=1
132	307	P11497|ACACA_RAT	21.17	0	0		1	0	1		265191	Acetyl-CoA carboxylase 1 OS=Rattus norvegicus OX=10116 GN=Acaca PE=1 SV=1
177	4381	tr|A0A0G2K4C6|A0A0G2K4C6_RAT	20.92	1	1	84153	1	1	1		63436	Malic enzyme OS=Rattus norvegicus OX=10116 GN=Me3 PE=3 SV=1
177	1308	P13697|MAOX_RAT	20.92	1	1	84153	1	1	1		64003	NADP-dependent malic enzyme OS=Rattus norvegicus OX=10116 GN=Me1 PE=1 SV=2
177	4463	tr|D3ZJH9|D3ZJH9_RAT	20.92	1	1	84153	1	1	1		65352	Malic enzyme OS=Rattus norvegicus OX=10116 GN=Me2 PE=1 SV=1
177	4464	tr|A0A0G2K502|A0A0G2K502_RAT	20.92	1	1	84153	1	1	1		66310	Malic enzyme OS=Rattus norvegicus OX=10116 GN=Me2 PE=1 SV=1
177	4382	tr|F1M5N4|F1M5N4_RAT	20.92	1	1	84153	1	1	1		67209	Malic enzyme OS=Rattus norvegicus OX=10116 GN=Me3 PE=3 SV=2
90	410	tr|F1LNF0|F1LNF0_RAT	20.47	0	0	256760	1	1	4		228912	Myosin heavy chain 14 OS=Rattus norvegicus OX=10116 GN=Myh14 PE=1 SV=1
124	298	tr|Q5RKL4|Q5RKL4_RAT	20.39	1	1	0	1	1	2		95977	Dimethylglycine dehydrogenase OS=Rattus norvegicus OX=10116 GN=Dmgdh PE=1 SV=1
124	299	Q63342|M2GD_RAT	20.39	1	1	0	1	1	2		96047	Dimethylglycine dehydrogenase mitochondrial OS=Rattus norvegicus OX=10116 GN=Dmgdh PE=1 SV=1
124	303	tr|A0A0G2K9Y2|A0A0G2K9Y2_RAT	20.39	1	1	0	1	1	2		98864	Dimethylglycine dehydrogenase mitochondrial OS=Rattus norvegicus OX=10116 GN=Dmgdh PE=1 SV=1

## Sheet: RHM Control I-III(2)-IV(H)
Accession	Protein Group	Protein ID	-10lgP	Coverage (%)	Coverage (%) Sample 2	IBAQ	#Peptides	#Unique	#Spec Sample 2	PTM	Avg. Mass	Description
Q66HF1|NDUS1_RAT	1	3421	242.54	28	28	41174000	46	46	127	Y	79412	NADH-ubiquinone oxidoreductase 75 kDa subunit, mitochondrial OS=Rattus norvegicus OX=10116 GN=Ndufs1 PE=1 SV=1
P19234|NDUV2_RAT	2	2870	240.09	36	36	47076000	32	32	116	Y	27378	NADH dehydrogenase [ubiquinone] flavoprotein 2, mitochondrial OS=Rattus norvegicus OX=10116 GN=Ndufv2 PE=1 SV=2
Q5BK63|NDUA9_RAT	7	5406	215.02	31	31	13836000	22	21	70	N	42559	NADH dehydrogenase [ubiquinone] 1 alpha subcomplex subunit 9, mitochondrial OS=Rattus norvegicus OX=10116 GN=Ndufa9 PE=1 SV=2
P32551|QCR2_RAT	3	34	214.98	32	32	41186000	38	38	114	Y	48396	Cytochrome b-c1 complex subunit 2, mitochondrial OS=Rattus norvegicus OX=10116 GN=Uqcrc2 PE=1 SV=2
P10719|ATPB_RAT	10	1	214.82	14	14	13124000	17	17	44	Y	56354	ATP synthase subunit beta, mitochondrial OS=Rattus norvegicus OX=10116 GN=Atp5f1b PE=1 SV=2
tr|G3V6D3|G3V6D3_RAT	10	2	214.82	14	14	13124000	17	17	44	Y	56345	ATP synthase subunit beta OS=Rattus norvegicus OX=10116 GN=Atp5f1b PE=1 SV=1
Q68FY0|QCR1_RAT	4	118	203.19	29	29	31011000	36	36	95	Y	52849	Cytochrome b-c1 complex subunit 1, mitochondrial OS=Rattus norvegicus OX=10116 GN=Uqcrc1 PE=1 SV=1
Q641Y2|NDUS2_RAT	5	2856	199.64	22	22	23036000	27	27	81	N	52562	NADH dehydrogenase [ubiquinone] iron-sulfur protein 2, mitochondrial OS=Rattus norvegicus OX=10116 GN=Ndufs2 PE=1 SV=1
tr|D3ZFQ8|D3ZFQ8_RAT	15	133	195.71	23	23	16067000	13	13	34	Y	35435	Cytochrome c-1 OS=Rattus norvegicus OX=10116 GN=Cyc1 PE=1 SV=3
P02563|MYH6_RAT	6	196	195.57	15	15	11436000	37	37	72	Y	223506	Myosin-6 OS=Rattus norvegicus OX=10116 GN=Myh6 PE=1 SV=2
P20788|UCRI_RAT	18	132	186.44	20	20	9091700	11	11	32	N	29446	Cytochrome b-c1 complex subunit Rieske, mitochondrial OS=Rattus norvegicus OX=10116 GN=Uqcrfs1 PE=1 SV=2
tr|B2RYS8|B2RYS8_RAT	23	2857	185.82	23	23	8790200	12	12	22	Y	21959	NADH dehydrogenase [ubiquinone] 1 beta subcomplex subunit 8, mitochondrial OS=Rattus norvegicus OX=10116 GN=Ndufb8 PE=1 SV=1
P11240|COX5A_RAT	13	86	179.36	48	48	6966500	12	12	38	N	16130	Cytochrome c oxidase subunit 5A, mitochondrial OS=Rattus norvegicus OX=10116 GN=Cox5a PE=1 SV=1
tr|D3ZF13|D3ZF13_RAT	14	3210	178.94	28	28	8608100	14	14	34	Y	17514	Acyl carrier protein OS=Rattus norvegicus OX=10116 GN=Ndufab1 PE=1 SV=1
tr|Q5PQZ9|Q5PQZ9_RAT	16	2821	175.83	36	36	14648000	10	10	33	N	14359	NADH dehydrogenase [ubiquinone] 1 subunit C2 OS=Rattus norvegicus OX=10116 GN=Ndufc2 PE=1 SV=1
tr|D3ZG43|D3ZG43_RAT	9	2807	162.53	30	30	17012000	21	21	48	N	30226	NADH dehydrogenase (Ubiquinone) Fe-S protein 3 (Predicted), isoform CRA_c OS=Rattus norvegicus OX=10116 GN=Ndufs3 PE=1 SV=1
Q80W89|NDUAB_RAT	22	5440	161.18	21	21	6703000	8	8	23	N	14854	NADH dehydrogenase [ubiquinone] 1 alpha subcomplex subunit 11 OS=Rattus norvegicus OX=10116 GN=Ndufa11 PE=2 SV=1
tr|B0BNE6|B0BNE6_RAT	20	5411	159.58	17	17	4028900	9	9	25	N	23970	NADH dehydrogenase (Ubiquinone) Fe-S protein 8 (Predicted), isoform CRA_a OS=Rattus norvegicus OX=10116 GN=Ndufs8 PE=1 SV=1
Q561S0|NDUAA_RAT	12	5410	152.71	35	35	7850800	20	20	42	Y	40493	NADH dehydrogenase [ubiquinone] 1 alpha subcomplex subunit 10, mitochondrial OS=Rattus norvegicus OX=10116 GN=Ndufa10 PE=1 SV=1
tr|A0A411P2I9|A0A411P2I9_RAT	17	39	151.02	10	10	5777900	11	11	33	N	40144	Cytochrome b (Fragment) OS=Rattus norvegicus OX=10116 GN=Cytb PE=3 SV=1
tr|A0A0U2IDR8|A0A0U2IDR8_RAT	17	40	151.02	10	10	5777900	11	11	33	N	40981	Cytochrome b (Fragment) OS=Rattus norvegicus OX=10116 PE=3 SV=1
tr|A0A0U2M179|A0A0U2M179_RAT	17	41	151.02	10	10	5777900	11	11	33	N	41037	Cytochrome b (Fragment) OS=Rattus norvegicus OX=10116 PE=3 SV=1
tr|A0A411P2L0|A0A411P2L0_RAT	17	42	151.02	10	10	5777900	11	11	33	N	41017	Cytochrome b (Fragment) OS=Rattus norvegicus OX=10116 GN=Cytb PE=3 SV=1
tr|F8QU31|F8QU31_RAT	17	43	151.02	9	9	5777900	11	11	33	N	42181	Cytochrome b (Fragment) OS=Rattus norvegicus OX=10116 GN=cytb PE=3 SV=1
tr|A0A411P2K0|A0A411P2K0_RAT	17	44	151.02	9	9	5777900	11	11	33	N	42238	Cytochrome b (Fragment) OS=Rattus norvegicus OX=10116 GN=Cytb PE=3 SV=1
tr|L0L4L8|L0L4L8_RAT	17	45	151.02	9	9	5777900	11	11	33	N	42470	Cytochrome b (Fragment) OS=Rattus norvegicus OX=10116 GN=cytb PE=3 SV=1
tr|A0A140GE10|A0A140GE10_RAT	17	46	151.02	9	9	5777900	11	11	33	N	42574	Cytochrome b (Fragment) OS=Rattus norvegicus OX=10116 PE=3 SV=1
tr|A0A140GE11|A0A140GE11_RAT	17	47	151.02	9	9	5777900	11	11	33	N	42588	Cytochrome b (Fragment) OS=Rattus norvegicus OX=10116 PE=3 SV=1
tr|A0A140GE08|A0A140GE08_RAT	17	48	151.02	9	9	5777900	11	11	33	N	42527	Cytochrome b (Fragment) OS=Rattus norvegicus OX=10116 PE=3 SV=1
tr|A0A385HCC9|A0A385HCC9_RAT	17	49	151.02	9	9	5777900	11	11	33	N	42766	Cytochrome b (Fragment) OS=Rattus norvegicus OX=10116 PE=3 SV=1
tr|A0A3Q8AGE8|A0A3Q8AGE8_RAT	17	50	151.02	9	9	5777900	11	11	33	N	42712	Cytochrome b (Fragment) OS=Rattus norvegicus OX=10116 GN=Cytb PE=3 SV=1
tr|A0A3Q8AC68|A0A3Q8AC68_RAT	17	38	151.02	9	9	5777900	11	11	33	N	42622	Cytochrome b (Fragment) OS=Rattus norvegicus OX=10116 GN=Cytb PE=3 SV=1
tr|A0A3S6FK13|A0A3S6FK13_RAT	17	51	151.02	9	9	5777900	11	11	33	N	42702	Cytochrome b (Fragment) OS=Rattus norvegicus OX=10116 GN=Cytb PE=3 SV=1
tr|A0A3S6FM15|A0A3S6FM15_RAT	17	52	151.02	9	9	5777900	11	11	33	N	42698	Cytochrome b (Fragment) OS=Rattus norvegicus OX=10116 GN=Cytb PE=3 SV=1
tr|A0A097PE40|A0A097PE40_RAT	17	53	151.02	9	9	5777900	11	11	33	N	42865	Cytochrome b OS=Rattus norvegicus OX=10116 GN=CYTB PE=3 SV=1
tr|A0A220D9Z6|A0A220D9Z6_RAT	17	54	151.02	9	9	5777900	11	11	33	N	43018	Cytochrome b OS=Rattus norvegicus OX=10116 PE=3 SV=1
tr|D6NSP2|D6NSP2_RAT	17	55	151.02	9	9	5777900	11	11	33	N	42945	Cytochrome b (Fragment) OS=Rattus norvegicus OX=10116 GN=cytb PE=3 SV=1
tr|D6NSS6|D6NSS6_RAT	17	56	151.02	9	9	5777900	11	11	33	N	42993	Cytochrome b (Fragment) OS=Rattus norvegicus OX=10116 GN=cytb PE=3 SV=1
tr|D6NSQ3|D6NSQ3_RAT	17	57	151.02	9	9	5777900	11	11	33	N	43012	Cytochrome b (Fragment) OS=Rattus norvegicus OX=10116 GN=cytb PE=3 SV=1
tr|D6NSR3|D6NSR3_RAT	17	58	151.02	9	9	5777900	11	11	33	N	42986	Cytochrome b (Fragment) OS=Rattus norvegicus OX=10116 GN=cytb PE=3 SV=1
tr|D6NSP4|D6NSP4_RAT	17	59	151.02	9	9	5777900	11	11	33	N	43016	Cytochrome b (Fragment) OS=Rattus norvegicus OX=10116 GN=cytb PE=3 SV=1
tr|D6NSQ8|D6NSQ8_RAT	17	60	151.02	9	9	5777900	11	11	33	N	43016	Cytochrome b (Fragment) OS=Rattus norvegicus OX=10116 GN=cytb PE=3 SV=1
tr|D6NSR8|D6NSR8_RAT	17	61	151.02	9	9	5777900	11	11	33	N	42998	Cytochrome b (Fragment) OS=Rattus norvegicus OX=10116 GN=cytb PE=3 SV=1
tr|F8QU37|F8QU37_RAT	17	62	151.02	9	9	5777900	11	11	33	N	42992	Cytochrome b (Fragment) OS=Rattus norvegicus OX=10116 GN=cytb PE=3 SV=1
tr|F2Q6S6|F2Q6S6_RAT	17	63	151.02	9	9	5777900	11	11	33	N	42938	Cytochrome b (Fragment) OS=Rattus norvegicus OX=10116 GN=cytb PE=3 SV=1
tr|A0A0A1FZ42|A0A0A1FZ42_RAT	17	64	151.02	9	9	5777900	11	11	33	N	42989	Cytochrome b OS=Rattus norvegicus OX=10116 GN=CYTB PE=3 SV=1
tr|D6NSS7|D6NSS7_RAT	17	65	151.02	9	9	5777900	11	11	33	N	42948	Cytochrome b (Fragment) OS=Rattus norvegicus OX=10116 GN=cytb PE=3 SV=1
tr|Q8SEY9|Q8SEY9_RAT	17	66	151.02	9	9	5777900	11	11	33	N	43015	Cytochrome b OS=Rattus norvegicus OX=10116 GN=cytb PE=3 SV=1
tr|D6NSR7|D6NSR7_RAT	17	67	151.02	9	9	5777900	11	11	33	N	42982	Cytochrome b (Fragment) OS=Rattus norvegicus OX=10116 GN=cytb PE=3 SV=1
tr|A0A220DA44|A0A220DA44_RAT	17	68	151.02	9	9	5777900	11	11	33	N	42968	Cytochrome b OS=Rattus norvegicus OX=10116 PE=3 SV=1
tr|F2Q6S5|F2Q6S5_RAT	17	69	151.02	9	9	5777900	11	11	33	N	42952	Cytochrome b (Fragment) OS=Rattus norvegicus OX=10116 GN=cytb PE=3 SV=1
tr|D6NSQ6|D6NSQ6_RAT	17	70	151.02	9	9	5777900	11	11	33	N	42952	Cytochrome b (Fragment) OS=Rattus norvegicus OX=10116 GN=cytb PE=3 SV=1
tr|D6NSQ0|D6NSQ0_RAT	17	71	151.02	9	9	5777900	11	11	33	N	42968	Cytochrome b (Fragment) OS=Rattus norvegicus OX=10116 GN=cytb PE=3 SV=1
tr|Q5UAI7|Q5UAI7_RAT	17	72	151.02	9	9	5777900	11	11	33	N	42998	Cytochrome b OS=Rattus norvegicus OX=10116 GN=CYTB PE=3 SV=1
tr|D6NSR2|D6NSR2_RAT	17	73	151.02	9	9	5777900	11	11	33	N	43073	Cytochrome b (Fragment) OS=Rattus norvegicus OX=10116 GN=cytb PE=3 SV=1
tr|A0A0S1Z1V9|A0A0S1Z1V9_RAT	17	74	151.02	9	9	5777900	11	11	33	N	43002	Cytochrome b OS=Rattus norvegicus OX=10116 GN=CYTB PE=3 SV=1
tr|D6NSR1|D6NSR1_RAT	17	75	151.02	9	9	5777900	11	11	33	N	43002	Cytochrome b (Fragment) OS=Rattus norvegicus OX=10116 GN=cytb PE=3 SV=1
tr|Q8HIC4|Q8HIC4_RAT	17	76	151.02	9	9	5777900	11	11	33	N	43012	Cytochrome b OS=Rattus norvegicus OX=10116 GN=Mt-cyb PE=3 SV=1
tr|A0A220DA02|A0A220DA02_RAT	17	77	151.02	9	9	5777900	11	11	33	N	42968	Cytochrome b OS=Rattus norvegicus OX=10116 PE=3 SV=1
tr|A0A0S1Z1V4|A0A0S1Z1V4_RAT	17	78	151.02	9	9	5777900	11	11	33	N	43016	Cytochrome b OS=Rattus norvegicus OX=10116 GN=CYTB PE=3 SV=1
tr|R9TKN1|R9TKN1_RAT	17	119	151.02	9	9	5777900	11	11	33	N	43012	Cytochrome b OS=Rattus norvegicus OX=10116 GN=CYTB PE=3 SV=1
P00159|CYB_RAT	17	79	151.02	9	9	5777900	11	11	33	N	43012	Cytochrome b OS=Rattus norvegicus OX=10116 GN=Mt-Cyb PE=3 SV=3
tr|L0N311|L0N311_RAT	17	80	151.02	9	9	5777900	11	11	33	N	43045	Cytochrome b (Fragment) OS=Rattus norvegicus OX=10116 GN=cytb PE=3 SV=1
tr|A0A220DA28|A0A220DA28_RAT	17	81	151.02	9	9	5777900	11	11	33	N	42970	Cytochrome b OS=Rattus norvegicus OX=10116 PE=3 SV=1
tr|H2KXA0|H2KXA0_RAT	17	82	151.02	9	9	5777900	11	11	33	N	42978	Cytochrome b (Fragment) OS=Rattus norvegicus OX=10116 GN=cytb PE=3 SV=1
tr|A0A096XNM4|A0A096XNM4_RAT	17	83	151.02	9	9	5777900	11	11	33	N	43042	Cytochrome b (Fragment) OS=Rattus norvegicus OX=10116 PE=3 SV=1
tr|D6NSP5|D6NSP5_RAT	17	120	151.02	9	9	5777900	11	11	33	N	43012	Cytochrome b (Fragment) OS=Rattus norvegicus OX=10116 GN=cytb PE=3 SV=1
P15999|ATPA_RAT	8	3	148.67	20	20	8088800	19	19	48	N	59754	ATP synthase subunit alpha, mitochondrial OS=Rattus norvegicus OX=10116 GN=Atp5f1a PE=1 SV=2
tr|F1LP05|F1LP05_RAT	8	4	148.67	20	20	8088800	19	19	48	N	59813	ATP synthase subunit alpha OS=Rattus norvegicus OX=10116 GN=Atp5f1a PE=1 SV=1
Q6AXV4|SAM50_RAT	32	2803	148.56	14	14	2832600	8	8	15	N	51960	Sorting and assembly machinery component 50 homolog OS=Rattus norvegicus OX=10116 GN=Samm50 PE=1 SV=1
tr|Q5XIH3|Q5XIH3_RAT	11	5408	141.88	12	12	9537800	12	12	43	N	50731	NADH dehydrogenase [ubiquinone] flavoprotein 1, mitochondrial OS=Rattus norvegicus OX=10116 GN=Ndufv1 PE=1 SV=1
P67779|PHB_RAT	21	5407	141.46	28	28	3269800	12	12	24	N	29820	Prohibitin OS=Rattus norvegicus OX=10116 GN=Phb PE=1 SV=1
tr|A0A0G2JVH4|A0A0G2JVH4_RAT	25	147	141.36	11	11	3368600	12	12	19	N	86230	MICOS complex subunit MIC60 OS=Rattus norvegicus OX=10116 GN=Immt PE=1 SV=1
tr|A0A140TAG5|A0A140TAG5_RAT	25	145	141.36	14	14	3368600	12	12	19	N	67049	MICOS complex subunit MIC60 OS=Rattus norvegicus OX=10116 GN=Immt PE=1 SV=1
Q3KR86|MIC60_RAT	25	146	141.36	14	14	3368600	12	12	19	N	67177	MICOS complex subunit Mic60 (Fragment) OS=Rattus norvegicus OX=10116 GN=Immt PE=1 SV=1
P00507|AATM_RAT	30	19	139.71	11	11	2877000	8	8	16	Y	47314	Aspartate aminotransferase, mitochondrial OS=Rattus norvegicus OX=10116 GN=Got2 PE=1 SV=2
tr|D4A7L4|D4A7L4_RAT	28	2872	139.22	26	26	8714300	6	6	18	Y	17634	NADH dehydrogenase (Ubiquinone) 1 beta subcomplex, 11 (Predicted) OS=Rattus norvegicus OX=10116 GN=Ndufb11 PE=1 SV=1
Q02253|MMSA_RAT	33	2801	131.03	17	17	1652900	9	9	14	Y	57808	Methylmalonate-semialdehyde dehydrogenase [acylating], mitochondrial OS=Rattus norvegicus OX=10116 GN=Aldh6a1 PE=1 SV=1
tr|G3V7J0|G3V7J0_RAT	33	2802	131.03	17	17	1652900	9	9	14	Y	57748	Aldehyde dehydrogenase family 6, subfamily A1, isoform CRA_b OS=Rattus norvegicus OX=10116 GN=Aldh6a1 PE=1 SV=1
tr|F1LXA0|F1LXA0_RAT	40	5458	125.66	17	17	2298700	4	4	8	N	17178	NADH dehydrogenase [ubiquinone] 1 alpha subcomplex subunit 12 OS=Rattus norvegicus OX=10116 GN=Ndufa12 PE=1 SV=2
tr|A0A0G2JVL6|A0A0G2JVL6_RAT	31	3028	123.31	33	33	4706400	7	7	15	Y	19965	NADH dehydrogenase [ubiquinone] 1 alpha subcomplex subunit 8 OS=Rattus norvegicus OX=10116 GN=Ndufa8 PE=1 SV=1
tr|D4A565|D4A565_RAT	27	5412	122.44	30	30	3205900	10	10	18	N	21664	NADH dehydrogenase (Ubiquinone) 1 beta subcomplex, 5 (Predicted), isoform CRA_b OS=Rattus norvegicus OX=10116 GN=Ndufb5 PE=1 SV=1
tr|D4A0T0|D4A0T0_RAT	24	180	120.28	26	26	10576000	9	9	20	N	20859	NADH:ubiquinone oxidoreductase subunit B10 OS=Rattus norvegicus OX=10116 GN=Ndufb10 PE=1 SV=1
tr|Q5UAJ6|Q5UAJ6_RAT	19	24	116.69	32	32	6738900	14	14	29	Y	25942	Cytochrome c oxidase subunit 2 OS=Rattus norvegicus OX=10116 GN=COX2 PE=3 SV=1
Q5M9I5|QCR6_RAT	26	2875	112.06	18	18	4097800	5	5	19	N	10424	Cytochrome b-c1 complex subunit 6, mitochondrial OS=Rattus norvegicus OX=10116 GN=Uqcrh PE=3 SV=1
tr|A0A0G2KB63|A0A0G2KB63_RAT	29	5422	111.64	24	24	5076400	7	7	16	Y	33168	Prohibitin OS=Rattus norvegicus OX=10116 GN=Phb2 PE=1 SV=1
Q5XIH7|PHB2_RAT	29	5423	111.64	24	24	5076400	7	7	16	Y	33312	Prohibitin-2 OS=Rattus norvegicus OX=10116 GN=Phb2 PE=1 SV=1
tr|D3ZS58|D3ZS58_RAT	34	5449	106.35	23	23	2032400	4	4	13	N	10845	NADH dehydrogenase [ubiquinone] 1 alpha subcomplex subunit 2 OS=Rattus norvegicus OX=10116 GN=Ndufa2 PE=1 SV=1
tr|D4A3V2|D4A3V2_RAT	38	5424	100.01	22	22	2676700	4	4	9	N	15224	NADH dehydrogenase [ubiquinone] 1 alpha subcomplex subunit 6 OS=Rattus norvegicus OX=10116 GN=Ndufa6 PE=1 SV=1
tr|Q06QK5|Q06QK5_RAT	36	5413	97.29	5	5	1684200	6	6	11	Y	68606	NADH-ubiquinone oxidoreductase chain 5 OS=Rattus norvegicus OX=10116 GN=ND5 PE=3 SV=1
P11661|NU5M_RAT	36	5414	97.29	5	5	1684200	6	6	11	Y	68618	NADH-ubiquinone oxidoreductase chain 5 OS=Rattus norvegicus OX=10116 GN=Mtnd5 PE=3 SV=3
tr|Q06QG6|Q06QG6_RAT	36	5415	97.29	5	5	1684200	6	6	11	Y	68588	NADH-ubiquinone oxidoreductase chain 5 OS=Rattus norvegicus OX=10116 GN=ND5 PE=3 SV=1
tr|Q06QA1|Q06QA1_RAT	36	5416	97.29	5	5	1684200	6	6	11	Y	68574	NADH-ubiquinone oxidoreductase chain 5 OS=Rattus norvegicus OX=10116 GN=ND5 PE=3 SV=1
tr|Q8SEZ0|Q8SEZ0_RAT	36	5417	97.29	5	5	1684200	6	6	11	Y	68618	NADH-ubiquinone oxidoreductase chain 5 OS=Rattus norvegicus OX=10116 GN=Mt-nd5 PE=3 SV=1
tr|A0A096XKT9|A0A096XKT9_RAT	36	5418	97.29	5	5	1684200	6	6	11	Y	68584	NADH-ubiquinone oxidoreductase chain 5 OS=Rattus norvegicus OX=10116 GN=ND5 PE=3 SV=1
tr|B5DEL8|B5DEL8_RAT	44	5442	96.29	23	23	2524100	4	4	7	N	12700	NADH dehydrogenase (Ubiquinone) Fe-S protein 5 OS=Rattus norvegicus OX=10116 GN=Ndufs5 PE=1 SV=1
tr|A0A0G2JZJ9|A0A0G2JZJ9_RAT	44	5443	96.29	23	23	2524100	4	4	7	N	12730	Uncharacterized protein OS=Rattus norvegicus OX=10116 PE=4 SV=1
P31399|ATP5H_RAT	59	7	94.75	20	20	570370	3	3	4	N	18763	ATP synthase subunit d, mitochondrial OS=Rattus norvegicus OX=10116 GN=Atp5pd PE=1 SV=3
Q63362|NDUA5_RAT	35	5439	94	28	28	1728200	4	4	11	N	13412	NADH dehydrogenase [ubiquinone] 1 alpha subcomplex subunit 5 OS=Rattus norvegicus OX=10116 GN=Ndufa5 PE=1 SV=3
P35435|ATPG_RAT	54	5	92.58	8	8	374190	3	3	5	N	30191	ATP synthase subunit gamma, mitochondrial OS=Rattus norvegicus OX=10116 GN=Atp5f1c PE=1 SV=2
tr|Q6QI09|Q6QI09_RAT	54	6	92.58	4	4	374190	3	3	5	N	67721	ATP synthase subunit gamma, mitochondrial OS=Rattus norvegicus OX=10116 GN=Taf3 PE=1 SV=1
P10817|CX6A2_RAT	41	151	91.57	17	17	1335400	5	5	8	N	10487	Cytochrome c oxidase subunit 6A2, mitochondrial (Fragment) OS=Rattus norvegicus OX=10116 GN=Cox6a2 PE=1 SV=3
tr|G3V8M4|G3V8M4_RAT	41	152	91.57	16	16	1335400	5	5	8	N	10802	Cytochrome c oxidase subunit 6A, mitochondrial OS=Rattus norvegicus OX=10116 GN=Cox6a2 PE=3 SV=1
tr|D3ZZ21|D3ZZ21_RAT	42	5448	90.48	34	34	1585200	6	6	7	Y	15638	NADH dehydrogenase (Ubiquinone) 1 beta subcomplex, 6 (Predicted) OS=Rattus norvegicus OX=10116 GN=Ndufb6 PE=1 SV=1
Q60587|ECHB_RAT	43	20	89.86	9	9	676180	5	5	7	N	51414	Trifunctional enzyme subunit beta, mitochondrial OS=Rattus norvegicus OX=10116 GN=Hadhb PE=1 SV=1
tr|A0A0G2K330|A0A0G2K330_RAT	43	21	89.86	9	9	676180	5	5	7	N	52568	Trifunctional enzyme subunit beta, mitochondrial OS=Rattus norvegicus OX=10116 GN=Hadhb PE=1 SV=1
P10888|COX41_RAT	37	290	82.08	15	15	1871200	5	5	11	Y	19515	Cytochrome c oxidase subunit 4 isoform 1, mitochondrial OS=Rattus norvegicus OX=10116 GN=Cox4i1 PE=1 SV=1
tr|F1LPG5|F1LPG5_RAT	69	5445	81.82	21	21	354200	2	2	3	N	15064	NADH:ubiquinone oxidoreductase subunit B4 OS=Rattus norvegicus OX=10116 GN=Ndufb4 PE=1 SV=1
tr|A9UMW2|A9UMW2_RAT	52	5453	79.81	33	33	3890800	4	4	5	Y	9255	Ndufa3 protein (Fragment) OS=Rattus norvegicus OX=10116 GN=Ndufa3 PE=2 SV=1
tr|M0RB63|M0RB63_RAT	52	5454	79.81	32	32	3890800	4	4	5	Y	9372	RCG63041 OS=Rattus norvegicus OX=10116 GN=LOC684509 PE=4 SV=1
tr|A0A0G2KAA3|A0A0G2KAA3_RAT	52	5455	79.81	30	30	3890800	4	4	5	Y	10170	NADH:ubiquinone oxidoreductase subunit A3 OS=Rattus norvegicus OX=10116 GN=Ndufa3 PE=1 SV=1
tr|D3ZE15|D3ZE15_RAT	45	5447	78.17	33	33	1235800	4	4	7	Y	16777	NADH:ubiquinone oxidoreductase subunit A13 OS=Rattus norvegicus OX=10116 GN=Ndufa13 PE=1 SV=1
tr|C8CHS6|C8CHS6_RAT	61	15533	74.94	26	26	203820	2	2	4	N	7988	Mitochondrial superoxide dismutase 2 (Fragment) OS=Rattus norvegicus OX=10116 PE=2 SV=1
P07895|SODM_RAT	61	2881	74.94	9	9	203820	2	2	4	N	24674	Superoxide dismutase [Mn], mitochondrial OS=Rattus norvegicus OX=10116 GN=Sod2 PE=1 SV=2
tr|D3ZUX5|D3ZUX5_RAT	79	2815	74.57	9	9	1113500	2	2	2	N	26435	MICOS complex subunit OS=Rattus norvegicus OX=10116 GN=Chchd3 PE=1 SV=1
P17764|THIL_RAT	47	2787	71.56	8	8	1087200	4	4	6	N	44695	Acetyl-CoA acetyltransferase, mitochondrial OS=Rattus norvegicus OX=10116 GN=Acat1 PE=1 SV=1
tr|F1LN92|F1LN92_RAT	39	7847	70.65	5	5	1056000	4	4	8	N	89352	AFG3-like matrix AAA peptidase subunit 2 OS=Rattus norvegicus OX=10116 GN=Afg3l2 PE=1 SV=1
tr|Q5RJN0|Q5RJN0_RAT	53	564	69.96	10	10	1507800	3	3	5	N	23945	NADH dehydrogenase (Ubiquinone) Fe-S protein 7 OS=Rattus norvegicus OX=10116 GN=Ndufs7 PE=1 SV=1
Q64428|ECHA_RAT	46	9	68.1	4	4	745210	3	3	7	N	82665	Trifunctional enzyme subunit alpha, mitochondrial OS=Rattus norvegicus OX=10116 GN=Hadha PE=1 SV=2
Q5XIF3|NDUS4_RAT	57	5457	66.68	11	11	540880	2	2	4	N	19741	NADH dehydrogenase [ubiquinone] iron-sulfur protein 4, mitochondrial OS=Rattus norvegicus OX=10116 GN=Ndufs4 PE=1 SV=1
P11951|CX6C2_RAT	68	2816	66.38	36	36	432780	3	3	3	Y	8455	Cytochrome c oxidase subunit 6C-2 OS=Rattus norvegicus OX=10116 GN=Cox6c2 PE=1 SV=3
Q9ER34|ACON_RAT	76	88	63.98	4	4	436150	2	2	2	N	85433	Aconitate hydratase, mitochondrial OS=Rattus norvegicus OX=10116 GN=Aco2 PE=1 SV=2
tr|Q35733|Q35733_RAT	62	5460	61.95	13	13	355130	3	3	4	N	8389	NADH-ubiquinone oxidoreductase chain 6 (Fragment) OS=Rattus norvegicus OX=10116 PE=3 SV=1
tr|Q06QD9|Q06QD9_RAT	62	5461	61.95	6	6	355130	3	3	4	N	18943	NADH-ubiquinone oxidoreductase chain 6 OS=Rattus norvegicus OX=10116 GN=ND6 PE=3 SV=1
tr|Q7HKW2|Q7HKW2_RAT	62	5462	61.95	6	6	355130	3	3	4	N	18957	NADH-ubiquinone oxidoreductase chain 6 OS=Rattus norvegicus OX=10116 GN=NADH6 PE=3 SV=1
P02770|ALBU_RAT	71	2832	58.72	2	2	447390	2	2	3	Y	68731	Serum albumin OS=Rattus norvegicus OX=10116 GN=Alb PE=1 SV=2
tr|A0A0G2JSH5|A0A0G2JSH5_RAT	71	2833	58.72	2	2	447390	2	2	3	Y	68759	Serum albumin OS=Rattus norvegicus OX=10116 GN=Alb PE=1 SV=1
P80432|COX7C_RAT	58	134	57.84	21	21	653930	2	2	4	N	7375	Cytochrome c oxidase subunit 7C, mitochondrial OS=Rattus norvegicus OX=10116 GN=Cox7c PE=1 SV=2
Q01205|ODO2_RAT	73	13095	54.67	9	9	1205300	2	2	2	Y	48925	Dihydrolipoyllysine-residue succinyltransferase component of 2-oxoglutarate dehydrogenase complex, mitochondrial OS=Rattus norvegicus OX=10116 GN=Dlst PE=1 SV=2
tr|G3V6P2|G3V6P2_RAT	73	13096	54.67	9	9	1205300	2	2	2	Y	48899	Dihydrolipoamide S-succinyltransferase (E2 component of 2-oxo-glutarate complex), isoform CRA_a OS=Rattus norvegicus OX=10116 GN=Dlst PE=1 SV=1
tr|A9UMV9|A9UMV9_RAT	50	5450	53.72	20	20	3607100	3	3	6	N	12500	NADH:ubiquinone oxidoreductase subunit A7 OS=Rattus norvegicus OX=10116 GN=Ndufa7 PE=1 SV=1
P19511|AT5F1_RAT	49	10	51.52	9	9	1827600	2	2	6	N	28869	ATP synthase F(0) complex subunit B1, mitochondrial OS=Rattus norvegicus OX=10116 GN=Atp5pb PE=1 SV=1
P12075|COX5B_RAT	48	139	51.26	11	11	4935500	3	3	6	N	13915	Cytochrome c oxidase subunit 5B, mitochondrial OS=Rattus norvegicus OX=10116 GN=Cox5b PE=1 SV=2
tr|D3ZCZ9|D3ZCZ9_RAT	70	5435	50.54	21	21	954580	2	2	3	N	13040	NADH dehydrogenase [ubiquinone] iron-sulfur protein 6, mitochondrial OS=Rattus norvegicus OX=10116 GN=LOC100912599 PE=1 SV=1
P05508|NU4M_RAT	66	5425	46.79	4	4	481580	2	2	3	N	51783	NADH-ubiquinone oxidoreductase chain 4 OS=Rattus norvegicus OX=10116 GN=Mtnd4 PE=3 SV=3
tr|D2E6K0|D2E6K0_RAT	66	5426	46.79	4	4	481580	2	2	3	N	51833	NADH-ubiquinone oxidoreductase chain 4 OS=Rattus norvegicus OX=10116 GN=ND4 PE=3 SV=1
tr|A7XYB9|A7XYB9_RAT	66	5427	46.79	4	4	481580	2	2	3	N	51773	NADH-ubiquinone oxidoreductase chain 4 OS=Rattus norvegicus OX=10116 GN=Nd4 PE=3 SV=1

## Sheet: RHM Control I-III(2)-IV(L)
Accession	Protein Group	Protein ID	-10lgP	Coverage (%)	Coverage (%) Sample 3	IBAQ	#Peptides	#Unique	#Spec Sample 3	PTM	Avg. Mass	Description
Q5BK63|NDUA9_RAT	7	5406	262.99	38	38	29784000	35	34	103	Y	42559	NADH dehydrogenase [ubiquinone] 1 alpha subcomplex subunit 9, mitochondrial OS=Rattus norvegicus OX=10116 GN=Ndufa9 PE=1 SV=2
Q68FY0|QCR1_RAT	1	118	262.68	38	38	77415000	61	61	202	Y	52849	Cytochrome b-c1 complex subunit 1, mitochondrial OS=Rattus norvegicus OX=10116 GN=Uqcrc1 PE=1 SV=1
Q66HF1|NDUS1_RAT	2	3421	253.83	38	38	83852000	67	66	174	Y	79412	NADH-ubiquinone oxidoreductase 75 kDa subunit, mitochondrial OS=Rattus norvegicus OX=10116 GN=Ndufs1 PE=1 SV=1
P19234|NDUV2_RAT	4	2870	242.81	46	46	88531000	43	43	126	Y	27378	NADH dehydrogenase [ubiquinone] flavoprotein 2, mitochondrial OS=Rattus norvegicus OX=10116 GN=Ndufv2 PE=1 SV=2
P32551|QCR2_RAT	3	34	241.32	35	35	80073000	56	56	162	Y	48396	Cytochrome b-c1 complex subunit 2, mitochondrial OS=Rattus norvegicus OX=10116 GN=Uqcrc2 PE=1 SV=2
tr|B2RYS8|B2RYS8_RAT	15	2857	238.52	37	37	25612000	18	18	49	Y	21959	NADH dehydrogenase [ubiquinone] 1 beta subcomplex subunit 8, mitochondrial OS=Rattus norvegicus OX=10116 GN=Ndufb8 PE=1 SV=1
tr|D3ZFQ8|D3ZFQ8_RAT	13	133	231.04	30	30	33694000	21	21	53	Y	35435	Cytochrome c-1 OS=Rattus norvegicus OX=10116 GN=Cyc1 PE=1 SV=3
P20788|UCRI_RAT	12	132	227.85	35	35	29898000	20	20	59	N	29446	Cytochrome b-c1 complex subunit Rieske, mitochondrial OS=Rattus norvegicus OX=10116 GN=Uqcrfs1 PE=1 SV=2
Q641Y2|NDUS2_RAT	6	2856	212.21	31	31	53720000	37	36	110	N	52562	NADH dehydrogenase [ubiquinone] iron-sulfur protein 2, mitochondrial OS=Rattus norvegicus OX=10116 GN=Ndufs2 PE=1 SV=1
tr|D3ZG43|D3ZG43_RAT	5	2807	210.03	42	42	38871000	32	32	111	N	30226	NADH dehydrogenase (Ubiquinone) Fe-S protein 3 (Predicted), isoform CRA_c OS=Rattus norvegicus OX=10116 GN=Ndufs3 PE=1 SV=1
tr|A0A097PE40|A0A097PE40_RAT	8	53	202.18	18	18	3485500	22	1	77	N	42865	Cytochrome b OS=Rattus norvegicus OX=10116 GN=CYTB PE=3 SV=1
tr|A0A411P2I9|A0A411P2I9_RAT	8	39	202.18	19	19	3485500	22	1	77	N	40144	Cytochrome b (Fragment) OS=Rattus norvegicus OX=10116 GN=Cytb PE=3 SV=1
tr|A0A0U2IDR8|A0A0U2IDR8_RAT	8	40	202.18	19	19	3485500	22	1	77	N	40981	Cytochrome b (Fragment) OS=Rattus norvegicus OX=10116 PE=3 SV=1
tr|A0A0U2M179|A0A0U2M179_RAT	8	41	202.18	19	19	3485500	22	1	77	N	41037	Cytochrome b (Fragment) OS=Rattus norvegicus OX=10116 PE=3 SV=1
tr|A0A411P2L0|A0A411P2L0_RAT	8	42	202.18	19	19	3485500	22	1	77	N	41017	Cytochrome b (Fragment) OS=Rattus norvegicus OX=10116 GN=Cytb PE=3 SV=1
tr|F8QU31|F8QU31_RAT	8	43	202.18	18	18	3485500	22	1	77	N	42181	Cytochrome b (Fragment) OS=Rattus norvegicus OX=10116 GN=cytb PE=3 SV=1
tr|A0A411P2K0|A0A411P2K0_RAT	8	44	202.18	18	18	3485500	22	1	77	N	42238	Cytochrome b (Fragment) OS=Rattus norvegicus OX=10116 GN=Cytb PE=3 SV=1
tr|L0L4L8|L0L4L8_RAT	8	45	202.18	18	18	3485500	22	1	77	N	42470	Cytochrome b (Fragment) OS=Rattus norvegicus OX=10116 GN=cytb PE=3 SV=1
tr|A0A140GE10|A0A140GE10_RAT	8	46	202.18	18	18	3485500	22	1	77	N	42574	Cytochrome b (Fragment) OS=Rattus norvegicus OX=10116 PE=3 SV=1
tr|A0A140GE11|A0A140GE11_RAT	8	47	202.18	18	18	3485500	22	1	77	N	42588	Cytochrome b (Fragment) OS=Rattus norvegicus OX=10116 PE=3 SV=1
tr|A0A140GE08|A0A140GE08_RAT	8	48	202.18	18	18	3485500	22	1	77	N	42527	Cytochrome b (Fragment) OS=Rattus norvegicus OX=10116 PE=3 SV=1
tr|A0A385HCC9|A0A385HCC9_RAT	8	49	202.18	18	18	3485500	22	1	77	N	42766	Cytochrome b (Fragment) OS=Rattus norvegicus OX=10116 PE=3 SV=1
tr|A0A3Q8AGE8|A0A3Q8AGE8_RAT	8	50	202.18	18	18	3485500	22	1	77	N	42712	Cytochrome b (Fragment) OS=Rattus norvegicus OX=10116 GN=Cytb PE=3 SV=1
tr|A0A3Q8AC68|A0A3Q8AC68_RAT	8	38	202.18	18	18	3485500	22	1	77	N	42622	Cytochrome b (Fragment) OS=Rattus norvegicus OX=10116 GN=Cytb PE=3 SV=1
tr|A0A3S6FM15|A0A3S6FM15_RAT	8	52	202.18	18	18	3485500	22	1	77	N	42698	Cytochrome b (Fragment) OS=Rattus norvegicus OX=10116 GN=Cytb PE=3 SV=1
tr|A0A220D9Z6|A0A220D9Z6_RAT	8	54	202.18	18	18	3485500	22	1	77	N	43018	Cytochrome b OS=Rattus norvegicus OX=10116 PE=3 SV=1
tr|D6NSP2|D6NSP2_RAT	8	55	202.18	18	18	3485500	22	1	77	N	42945	Cytochrome b (Fragment) OS=Rattus norvegicus OX=10116 GN=cytb PE=3 SV=1
tr|D6NSS6|D6NSS6_RAT	8	56	202.18	18	18	3485500	22	1	77	N	42993	Cytochrome b (Fragment) OS=Rattus norvegicus OX=10116 GN=cytb PE=3 SV=1
tr|D6NSQ3|D6NSQ3_RAT	8	57	202.18	18	18	3485500	22	1	77	N	43012	Cytochrome b (Fragment) OS=Rattus norvegicus OX=10116 GN=cytb PE=3 SV=1
tr|D6NSR3|D6NSR3_RAT	8	58	202.18	18	18	3485500	22	1	77	N	42986	Cytochrome b (Fragment) OS=Rattus norvegicus OX=10116 GN=cytb PE=3 SV=1
tr|D6NSP4|D6NSP4_RAT	8	59	202.18	18	18	3485500	22	1	77	N	43016	Cytochrome b (Fragment) OS=Rattus norvegicus OX=10116 GN=cytb PE=3 SV=1
tr|D6NSR8|D6NSR8_RAT	8	61	202.18	18	18	3485500	22	1	77	N	42998	Cytochrome b (Fragment) OS=Rattus norvegicus OX=10116 GN=cytb PE=3 SV=1
tr|F2Q6S6|F2Q6S6_RAT	8	63	202.18	18	18	3485500	22	1	77	N	42938	Cytochrome b (Fragment) OS=Rattus norvegicus OX=10116 GN=cytb PE=3 SV=1
tr|A0A0A1FZ42|A0A0A1FZ42_RAT	8	64	202.18	18	18	3485500	22	1	77	N	42989	Cytochrome b OS=Rattus norvegicus OX=10116 GN=CYTB PE=3 SV=1
tr|D6NSS7|D6NSS7_RAT	8	65	202.18	18	18	3485500	22	1	77	N	42948	Cytochrome b (Fragment) OS=Rattus norvegicus OX=10116 GN=cytb PE=3 SV=1
tr|Q8SEY9|Q8SEY9_RAT	8	66	202.18	18	18	3485500	22	1	77	N	43015	Cytochrome b OS=Rattus norvegicus OX=10116 GN=cytb PE=3 SV=1
tr|D6NSR7|D6NSR7_RAT	8	67	202.18	18	18	3485500	22	1	77	N	42982	Cytochrome b (Fragment) OS=Rattus norvegicus OX=10116 GN=cytb PE=3 SV=1
tr|A0A220DA44|A0A220DA44_RAT	8	68	202.18	18	18	3485500	22	1	77	N	42968	Cytochrome b OS=Rattus norvegicus OX=10116 PE=3 SV=1
tr|F2Q6S5|F2Q6S5_RAT	8	69	202.18	18	18	3485500	22	1	77	N	42952	Cytochrome b (Fragment) OS=Rattus norvegicus OX=10116 GN=cytb PE=3 SV=1
tr|D6NSQ0|D6NSQ0_RAT	8	71	202.18	18	18	3485500	22	1	77	N	42968	Cytochrome b (Fragment) OS=Rattus norvegicus OX=10116 GN=cytb PE=3 SV=1
tr|Q5UAI7|Q5UAI7_RAT	8	72	202.18	18	18	3485500	22	1	77	N	42998	Cytochrome b OS=Rattus norvegicus OX=10116 GN=CYTB PE=3 SV=1
tr|D6NSR2|D6NSR2_RAT	8	73	202.18	18	18	3485500	22	1	77	N	43073	Cytochrome b (Fragment) OS=Rattus norvegicus OX=10116 GN=cytb PE=3 SV=1
tr|A0A0S1Z1V9|A0A0S1Z1V9_RAT	8	74	202.18	18	18	3485500	22	1	77	N	43002	Cytochrome b OS=Rattus norvegicus OX=10116 GN=CYTB PE=3 SV=1
tr|D6NSR1|D6NSR1_RAT	8	75	202.18	18	18	3485500	22	1	77	N	43002	Cytochrome b (Fragment) OS=Rattus norvegicus OX=10116 GN=cytb PE=3 SV=1
tr|Q8HIC4|Q8HIC4_RAT	8	76	202.18	18	18	3485500	22	1	77	N	43012	Cytochrome b OS=Rattus norvegicus OX=10116 GN=Mt-cyb PE=3 SV=1
tr|A0A220DA02|A0A220DA02_RAT	8	77	202.18	18	18	3485500	22	1	77	N	42968	Cytochrome b OS=Rattus norvegicus OX=10116 PE=3 SV=1
tr|A0A0S1Z1V4|A0A0S1Z1V4_RAT	8	78	202.18	18	18	3485500	22	1	77	N	43016	Cytochrome b OS=Rattus norvegicus OX=10116 GN=CYTB PE=3 SV=1
tr|R9TKN1|R9TKN1_RAT	8	119	202.18	18	18	3485500	22	1	77	N	43012	Cytochrome b OS=Rattus norvegicus OX=10116 GN=CYTB PE=3 SV=1
P00159|CYB_RAT	8	79	202.18	18	18	3485500	22	1	77	N	43012	Cytochrome b OS=Rattus norvegicus OX=10116 GN=Mt-Cyb PE=3 SV=3
tr|L0N311|L0N311_RAT	8	80	202.18	18	18	3485500	22	1	77	N	43045	Cytochrome b (Fragment) OS=Rattus norvegicus OX=10116 GN=cytb PE=3 SV=1
tr|A0A220DA28|A0A220DA28_RAT	8	81	202.18	18	18	3485500	22	1	77	N	42970	Cytochrome b OS=Rattus norvegicus OX=10116 PE=3 SV=1
tr|H2KXA0|H2KXA0_RAT	8	82	202.18	18	18	3485500	22	1	77	N	42978	Cytochrome b (Fragment) OS=Rattus norvegicus OX=10116 GN=cytb PE=3 SV=1
tr|A0A096XNM4|A0A096XNM4_RAT	8	83	202.18	18	18	3485500	22	1	77	N	43042	Cytochrome b (Fragment) OS=Rattus norvegicus OX=10116 PE=3 SV=1
tr|D6NSP5|D6NSP5_RAT	8	120	202.18	18	18	3485500	22	1	77	N	43012	Cytochrome b (Fragment) OS=Rattus norvegicus OX=10116 GN=cytb PE=3 SV=1
tr|A0A385HC93|A0A385HC93_RAT	9	212	194.82	18	18	196240	22	1	73	N	42751	Cytochrome b (Fragment) OS=Rattus norvegicus OX=10116 PE=3 SV=1
tr|B0BNE6|B0BNE6_RAT	17	5411	194.78	27	27	9077000	18	18	42	N	23970	NADH dehydrogenase (Ubiquinone) Fe-S protein 8 (Predicted), isoform CRA_a OS=Rattus norvegicus OX=10116 GN=Ndufs8 PE=1 SV=1
tr|D3ZF13|D3ZF13_RAT	14	3210	192.11	31	31	22300000	21	21	51	Y	17514	Acyl carrier protein OS=Rattus norvegicus OX=10116 GN=Ndufab1 PE=1 SV=1
tr|D4A565|D4A565_RAT	20	5412	190.07	37	37	11795000	16	16	35	N	21664	NADH dehydrogenase (Ubiquinone) 1 beta subcomplex, 5 (Predicted), isoform CRA_b OS=Rattus norvegicus OX=10116 GN=Ndufb5 PE=1 SV=1
tr|Q5XIH3|Q5XIH3_RAT	11	5408	186.57	22	22	21344000	20	20	65	N	50731	NADH dehydrogenase [ubiquinone] flavoprotein 1, mitochondrial OS=Rattus norvegicus OX=10116 GN=Ndufv1 PE=1 SV=1
tr|Q5PQZ9|Q5PQZ9_RAT	16	2821	185.99	39	39	30829000	13	13	42	N	14359	NADH dehydrogenase [ubiquinone] 1 subunit C2 OS=Rattus norvegicus OX=10116 GN=Ndufc2 PE=1 SV=1
tr|A0A0G2JVL6|A0A0G2JVL6_RAT	18	3028	183.81	37	37	18316000	18	18	37	Y	19965	NADH dehydrogenase [ubiquinone] 1 alpha subcomplex subunit 8 OS=Rattus norvegicus OX=10116 GN=Ndufa8 PE=1 SV=1
P10719|ATPB_RAT	23	1	181.93	10	10	10128000	13	13	26	Y	56354	ATP synthase subunit beta, mitochondrial OS=Rattus norvegicus OX=10116 GN=Atp5f1b PE=1 SV=2
tr|G3V6D3|G3V6D3_RAT	23	2	181.93	10	10	10128000	13	13	26	Y	56345	ATP synthase subunit beta OS=Rattus norvegicus OX=10116 GN=Atp5f1b PE=1 SV=1
Q561S0|NDUAA_RAT	10	5410	177.25	46	46	20602000	33	33	72	Y	40493	NADH dehydrogenase [ubiquinone] 1 alpha subcomplex subunit 10, mitochondrial OS=Rattus norvegicus OX=10116 GN=Ndufa10 PE=1 SV=1
tr|D4A7L4|D4A7L4_RAT	19	2872	168.95	29	29	18411000	11	11	37	N	17634	NADH dehydrogenase (Ubiquinone) 1 beta subcomplex, 11 (Predicted) OS=Rattus norvegicus OX=10116 GN=Ndufb11 PE=1 SV=1
Q80W89|NDUAB_RAT	25	5440	164.41	21	21	12554000	9	9	25	N	14854	NADH dehydrogenase [ubiquinone] 1 alpha subcomplex subunit 11 OS=Rattus norvegicus OX=10116 GN=Ndufa11 PE=2 SV=1
tr|B5DEL8|B5DEL8_RAT	31	5442	157.61	23	23	8304200	7	7	17	N	12700	NADH dehydrogenase (Ubiquinone) Fe-S protein 5 OS=Rattus norvegicus OX=10116 GN=Ndufs5 PE=1 SV=1
tr|A0A0G2JZJ9|A0A0G2JZJ9_RAT	31	5443	157.61	23	23	8304200	7	7	17	N	12730	Uncharacterized protein OS=Rattus norvegicus OX=10116 PE=4 SV=1
tr|D4A0T0|D4A0T0_RAT	22	180	154.07	34	34	31942000	13	13	29	N	20859	NADH:ubiquinone oxidoreductase subunit B10 OS=Rattus norvegicus OX=10116 GN=Ndufb10 PE=1 SV=1
tr|A9UMW2|A9UMW2_RAT	26	5453	148.1	43	43	14590000	9	9	18	Y	9255	Ndufa3 protein (Fragment) OS=Rattus norvegicus OX=10116 GN=Ndufa3 PE=2 SV=1
tr|M0RB63|M0RB63_RAT	26	5454	148.1	43	43	14590000	9	9	18	Y	9372	RCG63041 OS=Rattus norvegicus OX=10116 GN=LOC684509 PE=4 SV=1
tr|A0A0G2KAA3|A0A0G2KAA3_RAT	26	5455	148.1	40	40	14590000	9	9	18	Y	10170	NADH:ubiquinone oxidoreductase subunit A3 OS=Rattus norvegicus OX=10116 GN=Ndufa3 PE=1 SV=1
tr|F1LXA0|F1LXA0_RAT	38	5458	146.06	17	17	4650700	5	5	11	N	17178	NADH dehydrogenase [ubiquinone] 1 alpha subcomplex subunit 12 OS=Rattus norvegicus OX=10116 GN=Ndufa12 PE=1 SV=2
tr|Q06QK5|Q06QK5_RAT	24	5413	139.43	11	11	12761000	13	13	25	Y	68606	NADH-ubiquinone oxidoreductase chain 5 OS=Rattus norvegicus OX=10116 GN=ND5 PE=3 SV=1
P11661|NU5M_RAT	24	5414	139.43	11	11	12761000	13	13	25	Y	68618	NADH-ubiquinone oxidoreductase chain 5 OS=Rattus norvegicus OX=10116 GN=Mtnd5 PE=3 SV=3
tr|Q06QG6|Q06QG6_RAT	24	5415	139.43	11	11	12761000	13	13	25	Y	68588	NADH-ubiquinone oxidoreductase chain 5 OS=Rattus norvegicus OX=10116 GN=ND5 PE=3 SV=1
tr|Q06QA1|Q06QA1_RAT	24	5416	139.43	11	11	12761000	13	13	25	Y	68574	NADH-ubiquinone oxidoreductase chain 5 OS=Rattus norvegicus OX=10116 GN=ND5 PE=3 SV=1
tr|Q8SEZ0|Q8SEZ0_RAT	24	5417	139.43	11	11	12761000	13	13	25	Y	68618	NADH-ubiquinone oxidoreductase chain 5 OS=Rattus norvegicus OX=10116 GN=Mt-nd5 PE=3 SV=1
tr|A0A096XKT9|A0A096XKT9_RAT	24	5418	139.43	11	11	12761000	13	13	25	Y	68584	NADH-ubiquinone oxidoreductase chain 5 OS=Rattus norvegicus OX=10116 GN=ND5 PE=3 SV=1
P15999|ATPA_RAT	21	3	130.49	19	19	5484100	14	14	32	N	59754	ATP synthase subunit alpha, mitochondrial OS=Rattus norvegicus OX=10116 GN=Atp5f1a PE=1 SV=2
tr|F1LP05|F1LP05_RAT	21	4	130.49	19	19	5484100	14	14	32	N	59813	ATP synthase subunit alpha OS=Rattus norvegicus OX=10116 GN=Atp5f1a PE=1 SV=1
tr|D3ZS58|D3ZS58_RAT	36	5449	125.37	31	31	3109900	5	5	11	N	10845	NADH dehydrogenase [ubiquinone] 1 alpha subcomplex subunit 2 OS=Rattus norvegicus OX=10116 GN=Ndufa2 PE=1 SV=1
P11240|COX5A_RAT	37	86	123.58	27	27	1870900	6	6	11	N	16130	Cytochrome c oxidase subunit 5A, mitochondrial OS=Rattus norvegicus OX=10116 GN=Cox5a PE=1 SV=1
Q5XIF3|NDUS4_RAT	30	5457	122.21	12	12	1812700	7	7	17	N	19741	NADH dehydrogenase [ubiquinone] iron-sulfur protein 4, mitochondrial OS=Rattus norvegicus OX=10116 GN=Ndufs4 PE=1 SV=1
tr|D3ZZ21|D3ZZ21_RAT	29	5448	119.92	34	34	5471200	8	8	17	Y	15638	NADH dehydrogenase (Ubiquinone) 1 beta subcomplex, 6 (Predicted) OS=Rattus norvegicus OX=10116 GN=Ndufb6 PE=1 SV=1
tr|D3ZE15|D3ZE15_RAT	33	5447	117.61	36	36	4475000	8	8	14	Y	16777	NADH:ubiquinone oxidoreductase subunit A13 OS=Rattus norvegicus OX=10116 GN=Ndufa13 PE=1 SV=1
tr|D4A3V2|D4A3V2_RAT	43	5424	116.44	22	22	1759200	5	5	8	N	15224	NADH dehydrogenase [ubiquinone] 1 alpha subcomplex subunit 6 OS=Rattus norvegicus OX=10116 GN=Ndufa6 PE=1 SV=1
tr|Q5UAJ6|Q5UAJ6_RAT	34	24	111.04	19	19	2728500	10	10	14	Y	25942	Cytochrome c oxidase subunit 2 OS=Rattus norvegicus OX=10116 GN=COX2 PE=3 SV=1
Q63362|NDUA5_RAT	41	5439	108.29	28	28	1982000	5	5	9	N	13412	NADH dehydrogenase [ubiquinone] 1 alpha subcomplex subunit 5 OS=Rattus norvegicus OX=10116 GN=Ndufa5 PE=1 SV=3
Q5M9I5|QCR6_RAT	27	2875	105.16	21	21	7211800	7	7	18	N	10424	Cytochrome b-c1 complex subunit 6, mitochondrial OS=Rattus norvegicus OX=10116 GN=Uqcrh PE=3 SV=1
tr|A9UMV9|A9UMV9_RAT	32	5450	104.46	21	21	11686000	4	4	16	N	12500	NADH:ubiquinone oxidoreductase subunit A7 OS=Rattus norvegicus OX=10116 GN=Ndufa7 PE=1 SV=1
P00507|AATM_RAT	40	19	98.56	11	11	1665800	6	6	9	Y	47314	Aspartate aminotransferase, mitochondrial OS=Rattus norvegicus OX=10116 GN=Got2 PE=1 SV=2
tr|Q35733|Q35733_RAT	49	5460	96.51	14	14	1053700	4	4	5	N	8389	NADH-ubiquinone oxidoreductase chain 6 (Fragment) OS=Rattus norvegicus OX=10116 PE=3 SV=1
tr|Q06QD9|Q06QD9_RAT	49	5461	96.51	6	6	1053700	4	4	5	N	18943	NADH-ubiquinone oxidoreductase chain 6 OS=Rattus norvegicus OX=10116 GN=ND6 PE=3 SV=1
tr|Q7HKW2|Q7HKW2_RAT	49	5462	96.51	6	6	1053700	4	4	5	N	18957	NADH-ubiquinone oxidoreductase chain 6 OS=Rattus norvegicus OX=10116 GN=NADH6 PE=3 SV=1
P02563|MYH6_RAT	45	196	96.23	2	2	1235500	5	5	7	N	223506	Myosin-6 OS=Rattus norvegicus OX=10116 GN=Myh6 PE=1 SV=2
tr|B2RYW3|B2RYW3_RAT	28	5441	93.62	35	35	10872000	6	6	17	Y	21892	NADH dehydrogenase (Ubiquinone) 1 beta subcomplex, 9 OS=Rattus norvegicus OX=10116 GN=Ndufb9 PE=1 SV=1
tr|D3ZCZ9|D3ZCZ9_RAT	42	5435	88.86	29	29	1712900	4	4	9	N	13040	NADH dehydrogenase [ubiquinone] iron-sulfur protein 6, mitochondrial OS=Rattus norvegicus OX=10116 GN=LOC100912599 PE=1 SV=1
tr|F1LPG5|F1LPG5_RAT	64	5445	84.44	29	29	975990	3	3	3	N	15064	NADH:ubiquinone oxidoreductase subunit B4 OS=Rattus norvegicus OX=10116 GN=Ndufb4 PE=1 SV=1
tr|Q5RJN0|Q5RJN0_RAT	39	564	79.92	11	11	3815700	5	5	10	N	23945	NADH dehydrogenase (Ubiquinone) Fe-S protein 7 OS=Rattus norvegicus OX=10116 GN=Ndufs7 PE=1 SV=1
P67779|PHB_RAT	55	5407	76.82	10	10	602730	3	3	4	N	29820	Prohibitin OS=Rattus norvegicus OX=10116 GN=Phb PE=1 SV=1
tr|D4A4P3|D4A4P3_RAT	44	5451	76.32	25	25	2427200	4	4	8	Y	11267	NADH:ubiquinone oxidoreductase subunit B3 OS=Rattus norvegicus OX=10116 GN=Ndufb3 PE=1 SV=1
P05508|NU4M_RAT	46	5425	74.52	7	7	1685000	5	5	7	N	51783	NADH-ubiquinone oxidoreductase chain 4 OS=Rattus norvegicus OX=10116 GN=Mtnd4 PE=3 SV=3
tr|D2E6K0|D2E6K0_RAT	46	5426	74.52	7	7	1685000	5	5	7	N	51833	NADH-ubiquinone oxidoreductase chain 4 OS=Rattus norvegicus OX=10116 GN=ND4 PE=3 SV=1
tr|A7XYB9|A7XYB9_RAT	46	5427	74.52	7	7	1685000	5	5	7	N	51773	NADH-ubiquinone oxidoreductase chain 4 OS=Rattus norvegicus OX=10116 GN=Nd4 PE=3 SV=1
tr|Q06QE1|Q06QE1_RAT	46	5428	74.52	7	7	1685000	5	5	7	N	51851	NADH-ubiquinone oxidoreductase chain 4 OS=Rattus norvegicus OX=10116 GN=ND4 PE=3 SV=1
tr|Q06QA2|Q06QA2_RAT	46	5429	74.52	7	7	1685000	5	5	7	N	51787	NADH-ubiquinone oxidoreductase chain 4 OS=Rattus norvegicus OX=10116 GN=ND4 PE=3 SV=1
tr|Q7HKW3|Q7HKW3_RAT	46	5430	74.52	7	7	1685000	5	5	7	N	51801	NADH-ubiquinone oxidoreductase chain 4 (Fragment) OS=Rattus norvegicus OX=10116 GN=NADH4 PE=3 SV=1
tr|Q06QG7|Q06QG7_RAT	46	5431	74.52	7	7	1685000	5	5	7	N	51791	NADH-ubiquinone oxidoreductase chain 4 OS=Rattus norvegicus OX=10116 GN=ND4 PE=3 SV=1
tr|Q06Q89|Q06Q89_RAT	46	5432	74.52	7	7	1685000	5	5	7	N	51819	NADH-ubiquinone oxidoreductase chain 4 OS=Rattus norvegicus OX=10116 GN=ND4 PE=3 SV=1
tr|Q8HIC6|Q8HIC6_RAT	46	5434	74.52	7	7	1685000	5	5	7	N	51783	NADH-ubiquinone oxidoreductase chain 4 OS=Rattus norvegicus OX=10116 GN=Mt-nd4 PE=3 SV=1
tr|Q35737|Q35737_RAT	46	5433	74.52	7	7	1685000	5	5	7	N	51765	NADH-ubiquinone oxidoreductase chain 4 OS=Rattus norvegicus OX=10116 PE=3 SV=1
Q6AXV4|SAM50_RAT	75	2803	70.96	6	6	151070	2	2	2	N	51960	Sorting and assembly machinery component 50 homolog OS=Rattus norvegicus OX=10116 GN=Samm50 PE=1 SV=1
tr|Q8SEZ8|Q8SEZ8_RAT	35	671	61.93	6	6	5781300	5	5	12	N	36133	NADH-ubiquinone oxidoreductase chain 1 (Fragment) OS=Rattus norvegicus OX=10116 GN=NADH1 PE=3 SV=1
P03889|NU1M_RAT	35	672	61.93	6	6	5781300	5	5	12	N	36145	NADH-ubiquinone oxidoreductase chain 1 OS=Rattus norvegicus OX=10116 GN=Mtnd1 PE=1 SV=3
tr|Q8HID1|Q8HID1_RAT	35	673	61.93	6	6	5781300	5	5	12	N	36145	NADH-ubiquinone oxidoreductase chain 1 OS=Rattus norvegicus OX=10116 GN=Mt-nd1 PE=3 SV=1
tr|D2E6L7|D2E6L7_RAT	35	5456	61.93	6	6	5781300	5	5	12	N	36062	NADH-ubiquinone oxidoreductase chain 1 OS=Rattus norvegicus OX=10116 GN=ND1 PE=3 SV=1
P35435|ATPG_RAT	77	5	57.75	8	8	218070	2	2	2	N	30191	ATP synthase subunit gamma, mitochondrial OS=Rattus norvegicus OX=10116 GN=Atp5f1c PE=1 SV=2
tr|Q6QI09|Q6QI09_RAT	77	6	57.75	4	4	218070	2	2	2	N	67721	ATP synthase subunit gamma, mitochondrial OS=Rattus norvegicus OX=10116 GN=Taf3 PE=1 SV=1
P19511|AT5F1_RAT	53	10	57.14	9	9	812140	2	2	4	N	28869	ATP synthase F(0) complex subunit B1, mitochondrial OS=Rattus norvegicus OX=10116 GN=Atp5pb PE=1 SV=1
tr|A0A140TAG5|A0A140TAG5_RAT	65	145	56.86	4	4	524870	2	2	3	N	67049	MICOS complex subunit MIC60 OS=Rattus norvegicus OX=10116 GN=Immt PE=1 SV=1
Q3KR86|MIC60_RAT	65	146	56.86	4	4	524870	2	2	3	N	67177	MICOS complex subunit Mic60 (Fragment) OS=Rattus norvegicus OX=10116 GN=Immt PE=1 SV=1
tr|A0A0G2JVH4|A0A0G2JVH4_RAT	65	147	56.86	3	3	524870	2	2	3	N	86230	MICOS complex subunit MIC60 OS=Rattus norvegicus OX=10116 GN=Immt PE=1 SV=1
Q60587|ECHB_RAT	66	20	56.1	5	5	240460	2	2	3	N	51414	Trifunctional enzyme subunit beta, mitochondrial OS=Rattus norvegicus OX=10116 GN=Hadhb PE=1 SV=1
tr|A0A0G2K330|A0A0G2K330_RAT	66	21	56.1	5	5	240460	2	2	3	N	52568	Trifunctional enzyme subunit beta, mitochondrial OS=Rattus norvegicus OX=10116 GN=Hadhb PE=1 SV=1
tr|B2RYU0|B2RYU0_RAT	48	5486	50.83	18	18	1243300	3	3	7	N	11842	NADH dehydrogenase (Ubiquinone) 1 beta subcomplex, 2 (Predicted), isoform CRA_b OS=Rattus norvegicus OX=10116 GN=Ndufb2 PE=1 SV=1
Q64428|ECHA_RAT	54	9	49.05	2	2	379450	2	2	4	N	82665	Trifunctional enzyme subunit alpha, mitochondrial OS=Rattus norvegicus OX=10116 GN=Hadha PE=1 SV=2
P31399|ATP5H_RAT	78	7	48.22	12	12	293370	2	2	2	N	18763	ATP synthase subunit d, mitochondrial OS=Rattus norvegicus OX=10116 GN=Atp5pd PE=1 SV=3
P10888|COX41_RAT	56	290	47.61	14	14	556290	3	3	4	N	19515	Cytochrome c oxidase subunit 4 isoform 1, mitochondrial OS=Rattus norvegicus OX=10116 GN=Cox4i1 PE=1 SV=1
tr|A0A0G2KB63|A0A0G2KB63_RAT	50	5422	47.03	13	13	1225000	3	3	4	N	33168	Prohibitin OS=Rattus norvegicus OX=10116 GN=Phb2 PE=1 SV=1
Q5XIH7|PHB2_RAT	50	5423	47.03	13	13	1225000	3	3	4	N	33312	Prohibitin-2 OS=Rattus norvegicus OX=10116 GN=Phb2 PE=1 SV=1
tr|Q06Q97|Q06Q97_RAT	51	1299	41.27	6	6	669860	3	3	4	N	38485	NADH-ubiquinone oxidoreductase chain 2 OS=Rattus norvegicus OX=10116 GN=ND2 PE=3 SV=1
tr|A0A0A1G491|A0A0A1G491_RAT	51	1300	41.27	6	6	669860	3	3	4	N	38542	NADH-ubiquinone oxidoreductase chain 2 OS=Rattus norvegicus OX=10116 GN=ND2 PE=3 SV=1
tr|Q5UAJ8|Q5UAJ8_RAT	51	1301	41.27	6	6	669860	3	3	4	N	38455	NADH-ubiquinone oxidoreductase chain 2 OS=Rattus norvegicus OX=10116 GN=ND2 PE=3 SV=1
tr|Q8HID0|Q8HID0_RAT	51	1303	41.27	6	6	669860	3	3	4	N	38653	NADH-ubiquinone oxidoreductase chain 2 OS=Rattus norvegicus OX=10116 GN=Mt-nd2 PE=3 SV=1
P11662|NU2M_RAT	51	1304	41.27	6	6	669860	3	3	4	N	38653	NADH-ubiquinone oxidoreductase chain 2 OS=Rattus norvegicus OX=10116 GN=Mtnd2 PE=3 SV=3
tr|Q06QH5|Q06QH5_RAT	51	1305	41.27	6	6	669860	3	3	4	N	38626	NADH-ubiquinone oxidoreductase chain 2 OS=Rattus norvegicus OX=10116 GN=ND2 PE=3 SV=1
tr|Q8SEZ7|Q8SEZ7_RAT	51	1306	41.27	6	6	669860	3	3	4	N	38580	NADH-ubiquinone oxidoreductase chain 2 (Fragment) OS=Rattus norvegicus OX=10116 GN=NADH2 PE=3 SV=1
tr|Q06QB0|Q06QB0_RAT	51	5452	41.27	6	6	669860	3	3	4	N	38534	NADH-ubiquinone oxidoreductase chain 2 OS=Rattus norvegicus OX=10116 GN=ND2 PE=3 SV=1
tr|D2E6P4|D2E6P4_RAT	51	1307	41.27	6	6	669860	3	3	4	N	38623	NADH-ubiquinone oxidoreductase chain 2 OS=Rattus norvegicus OX=10116 GN=ND2 PE=3 SV=1
tr|Q06QE9|Q06QE9_RAT	51	1308	41.27	6	6	669860	3	3	4	N	38598	NADH-ubiquinone oxidoreductase chain 2 OS=Rattus norvegicus OX=10116 GN=ND2 PE=3 SV=1
P80432|COX7C_RAT	116	134	38.09	21	21	105400	1	1	1	N	7375	Cytochrome c oxidase subunit 7C, mitochondrial OS=Rattus norvegicus OX=10116 GN=Cox7c PE=1 SV=2
P02770|ALBU_RAT	117	2832	35.8	1	1	72142	1	1	1	Y	68731	Serum albumin OS=Rattus norvegicus OX=10116 GN=Alb PE=1 SV=2
tr|A0A0G2JSH5|A0A0G2JSH5_RAT	117	2833	35.8	1	1	72142	1	1	1	Y	68759	Serum albumin OS=Rattus norvegicus OX=10116 GN=Alb PE=1 SV=1
tr|G3V644|G3V644_RAT	67	1383	34.98	3	3	873790	2	2	3	N	49300	NADH dehydrogenase (Ubiquinone) flavoprotein 3-like, isoform CRA_a OS=Rattus norvegicus OX=10116 GN=Ndufv3 PE=1 SV=1
tr|O54755|O54755_RAT	67	1384	34.98	3	3	873790	2	2	3	N	49312	MIPP65 OS=Rattus norvegicus OX=10116 GN=Ndufv3 PE=2 SV=1
Q7TQ16|QCR8_RAT	59	2828	33.56	20	20	1140400	2	2	3	N	9849	Cytochrome b-c1 complex subunit 8 OS=Rattus norvegicus OX=10116 GN=Uqcrq PE=3 SV=1
tr|D3ZUX5|D3ZUX5_RAT	118	2815	33.3	4	4	122690	1	1	1	N	26435	MICOS complex subunit OS=Rattus norvegicus OX=10116 GN=Chchd3 PE=1 SV=1
P10817|CX6A2_RAT	79	151	29.76	12	12	617270	1	1	2	N	10487	Cytochrome c oxidase subunit 6A2, mitochondrial (Fragment) OS=Rattus norvegicus OX=10116 GN=Cox6a2 PE=1 SV=3
tr|G3V8M4|G3V8M4_RAT	79	152	29.76	11	11	617270	1	1	2	N	10802	Cytochrome c oxidase subunit 6A, mitochondrial OS=Rattus norvegicus OX=10116 GN=Cox6a2 PE=3 SV=1
tr|Q5UAJ5|Q5UAJ5_RAT	119	32	27.72	13	13	478580	1	1	1	N	7642	ATP synthase protein 8 OS=Rattus norvegicus OX=10116 GN=ATP8 PE=3 SV=1
P11608|ATP8_RAT	119	35	27.72	13	13	478580	1	1	1	N	7630	ATP synthase protein 8 OS=Rattus norvegicus OX=10116 GN=Mt-atp8 PE=1 SV=2
tr|Q8SEZ4|Q8SEZ4_RAT	119	33	27.72	13	13	478580	1	1	1	N	7632	ATP synthase protein 8 OS=Rattus norvegicus OX=10116 GN=ATPase8 PE=3 SV=1
tr|Q8HIC8|Q8HIC8_RAT	119	36	27.72	13	13	478580	1	1	1	N	7630	ATP synthase protein 8 OS=Rattus norvegicus OX=10116 GN=Mt-atp8 PE=3 SV=1
P52631|STAT3_RAT	96	5489	27.16	1	1	1333400	1	1	1	N	88040	Signal transducer and activator of transcription 3 OS=Rattus norvegicus OX=10116 GN=Stat3 PE=1 SV=1
tr|Q5XHZ7|Q5XHZ7_RAT	80	12765	26.88	1	1	0	1	1	2	N	66660	MMR_HSR1 domain containing protein RGD1359460 OS=Rattus norvegicus OX=10116 GN=Noa1 PE=2 SV=1
tr|A0A0G2JUI4|A0A0G2JUI4_RAT	80	12766	26.88	1	1	0	1	1	2	N	66708	Nitric oxide-associated 1 OS=Rattus norvegicus OX=10116 GN=Noa1 PE=4 SV=1
tr|A0A0G2K602|A0A0G2K602_RAT	80	12767	26.88	1	1	0	1	1	2	N	77504	MMR_HSR1 domain containing protein RGD1359460, isoform CRA_a OS=Rattus norvegicus OX=10116 GN=Noa1 PE=4 SV=1
Q62600|NOS3_RAT	84	5463	26.58	1	1	466130	2	1	2	N	133290	Nitric oxide synthase, endothelial OS=Rattus norvegicus OX=10116 GN=Nos3 PE=1 SV=4
Q02253|MMSA_RAT	82	2801	26.58	4	4	308360	2	2	2	N	57808	Methylmalonate-semialdehyde dehydrogenase [acylating], mitochondrial OS=Rattus norvegicus OX=10116 GN=Aldh6a1 PE=1 SV=1
tr|G3V7J0|G3V7J0_RAT	82	2802	26.58	4	4	308360	2	2	2	N	57748	Aldehyde dehydrogenase family 6, subfamily A1, isoform CRA_b OS=Rattus norvegicus OX=10116 GN=Aldh6a1 PE=1 SV=1
tr|A9UMV7|A9UMV7_RAT	122	2873	44523	11	11	108350	1	1	1	N	6539	RCG29512 OS=Rattus norvegicus OX=10116 GN=Uqcr11 PE=1 SV=1
Q9ER34|ACON_RAT	97	88	23	2	2	0	1	1	1	N	85433	Aconitate hydratase, mitochondrial OS=Rattus norvegicus OX=10116 GN=Aco2 PE=1 SV=2
Q62630|EGLN3_RAT	123	12771	22.97	3	3	196260	1	1	1	Y	27242	Egl nine homolog 3 OS=Rattus norvegicus OX=10116 GN=Egln3 PE=1 SV=2
tr|F1LN92|F1LN92_RAT	120	7847	22.93	1	1	111170	1	1	1	N	89352	AFG3-like matrix AAA peptidase subunit 2 OS=Rattus norvegicus OX=10116 GN=Afg3l2 PE=1 SV=1
tr|Q8SEZ1|Q8SEZ1_RAT	121	7779	22.82	6	6	94812	1	1	1	N	13087	NADH-ubiquinone oxidoreductase chain 3 OS=Rattus norvegicus OX=10116 GN=Mt-nd3 PE=2 SV=1
P05506|NU3M_RAT	121	7780	22.82	6	6	94812	1	1	1	N	13087	NADH-ubiquinone oxidoreductase chain 3 OS=Rattus norvegicus OX=10116 GN=Mtnd3 PE=3 SV=3
tr|A0A0A1FZ38|A0A0A1FZ38_RAT	121	7781	22.82	6	6	94812	1	1	1	N	13071	NADH-ubiquinone oxidoreductase chain 3 OS=Rattus norvegicus OX=10116 GN=ND3 PE=3 SV=1
tr|Q06QG9|Q06QG9_RAT	121	7782	22.82	6	6	94812	1	1	1	N	13075	NADH-ubiquinone oxidoreductase chain 3 OS=Rattus norvegicus OX=10116 GN=ND3 PE=3 SV=1
tr|M0R6J0|M0R6J0_RAT	124	12772	22.22	3	3	793730	1	1	1	N	38374	Mitochondrial ribosomal protein L39 OS=Rattus norvegicus OX=10116 GN=Mrpl39 PE=1 SV=2
Q63560|MAP6_RAT	127	3380	21.41	1	1	203950	1	1	1	N	100485	Microtubule-associated protein 6 OS=Rattus norvegicus OX=10116 GN=Map6 PE=1 SV=1
B2RYN7|SPAST_RAT	87	12768	44459	2	2	0	1	1	1	Y	63022	Spastin OS=Rattus norvegicus OX=10116 GN=Spast PE=1 SV=1

## Sheet: RHM Control III(2)-IV(x)
Accession	Protein Group	Protein ID	-10lgP	Coverage (%)	Coverage (%) Sample 7	IBAQ	#Peptides	#Unique	#Spec Sample 7	PTM	Avg. Mass	Description
P10719|ATPB_RAT	2	1	327.61	37	37	55442000	81	81	184	Y	56354	ATP synthase subunit beta, mitochondrial OS=Rattus norvegicus OX=10116 GN=Atp5f1b PE=1 SV=2
tr|G3V6D3|G3V6D3_RAT	2	2	327.61	37	37	55442000	81	81	184	Y	56345	ATP synthase subunit beta OS=Rattus norvegicus OX=10116 GN=Atp5f1b PE=1 SV=1
P15999|ATPA_RAT	1	3	278.06	44	44	50080000	81	79	222	Y	59754	ATP synthase subunit alpha, mitochondrial OS=Rattus norvegicus OX=10116 GN=Atp5f1a PE=1 SV=2
tr|F1LP05|F1LP05_RAT	1	4	278.06	44	44	50080000	81	79	222	Y	59813	ATP synthase subunit alpha OS=Rattus norvegicus OX=10116 GN=Atp5f1a PE=1 SV=1
P35435|ATPG_RAT	5	5	236.59	32	32	10349000	26	26	65	Y	30191	ATP synthase subunit gamma, mitochondrial OS=Rattus norvegicus OX=10116 GN=Atp5f1c PE=1 SV=2
tr|Q6QI09|Q6QI09_RAT	5	6	236.59	14	14	10349000	26	26	65	Y	67721	ATP synthase subunit gamma, mitochondrial OS=Rattus norvegicus OX=10116 GN=Taf3 PE=1 SV=1
tr|D3ZFQ8|D3ZFQ8_RAT	9	133	235.99	29	29	9715200	22	22	52	Y	35435	Cytochrome c-1 OS=Rattus norvegicus OX=10116 GN=Cyc1 PE=1 SV=3
Q68FY0|QCR1_RAT	3	118	221.36	31	31	23228000	39	39	99	Y	52849	Cytochrome b-c1 complex subunit 1, mitochondrial OS=Rattus norvegicus OX=10116 GN=Uqcrc1 PE=1 SV=1
Q64428|ECHA_RAT	7	9	216.18	23	23	8785200	34	34	59	Y	82665	Trifunctional enzyme subunit alpha, mitochondrial OS=Rattus norvegicus OX=10116 GN=Hadha PE=1 SV=2
Q60587|ECHB_RAT	10	20	214.31	23	23	11020000	23	23	39	Y	51414	Trifunctional enzyme subunit beta, mitochondrial OS=Rattus norvegicus OX=10116 GN=Hadhb PE=1 SV=1
P00507|AATM_RAT	8	19	209.44	29	29	8210600	27	27	53	Y	47314	Aspartate aminotransferase, mitochondrial OS=Rattus norvegicus OX=10116 GN=Got2 PE=1 SV=2
P20788|UCRI_RAT	12	132	201.11	37	37	4900700	22	22	36	N	29446	Cytochrome b-c1 complex subunit Rieske, mitochondrial OS=Rattus norvegicus OX=10116 GN=Uqcrfs1 PE=1 SV=2
P32551|QCR2_RAT	4	34	198.35	30	30	19133000	38	38	87	Y	48396	Cytochrome b-c1 complex subunit 2, mitochondrial OS=Rattus norvegicus OX=10116 GN=Uqcrc2 PE=1 SV=2
P11240|COX5A_RAT	11	86	183.95	52	52	7033400	18	18	38	N	16130	Cytochrome c oxidase subunit 5A, mitochondrial OS=Rattus norvegicus OX=10116 GN=Cox5a PE=1 SV=1
P31399|ATP5H_RAT	16	7	183.4	39	39	4120100	16	16	28	N	18763	ATP synthase subunit d, mitochondrial OS=Rattus norvegicus OX=10116 GN=Atp5pd PE=1 SV=3
tr|A0A097PE40|A0A097PE40_RAT	13	53	175.7	16	16	572310	15	1	35	N	42865	Cytochrome b OS=Rattus norvegicus OX=10116 GN=CYTB PE=3 SV=1
tr|A0A411P2K0|A0A411P2K0_RAT	13	44	175.7	16	16	572310	15	1	35	N	42238	Cytochrome b (Fragment) OS=Rattus norvegicus OX=10116 GN=Cytb PE=3 SV=1
tr|L0L4L8|L0L4L8_RAT	13	45	175.7	16	16	572310	15	1	35	N	42470	Cytochrome b (Fragment) OS=Rattus norvegicus OX=10116 GN=cytb PE=3 SV=1
tr|A0A140GE10|A0A140GE10_RAT	13	46	175.7	16	16	572310	15	1	35	N	42574	Cytochrome b (Fragment) OS=Rattus norvegicus OX=10116 PE=3 SV=1
tr|A0A140GE11|A0A140GE11_RAT	13	47	175.7	16	16	572310	15	1	35	N	42588	Cytochrome b (Fragment) OS=Rattus norvegicus OX=10116 PE=3 SV=1
tr|A0A385HCC9|A0A385HCC9_RAT	13	49	175.7	16	16	572310	15	1	35	N	42766	Cytochrome b (Fragment) OS=Rattus norvegicus OX=10116 PE=3 SV=1
tr|A0A3Q8AGE8|A0A3Q8AGE8_RAT	13	50	175.7	16	16	572310	15	1	35	N	42712	Cytochrome b (Fragment) OS=Rattus norvegicus OX=10116 GN=Cytb PE=3 SV=1
tr|A0A3Q8AC68|A0A3Q8AC68_RAT	13	38	175.7	16	16	572310	15	1	35	N	42622	Cytochrome b (Fragment) OS=Rattus norvegicus OX=10116 GN=Cytb PE=3 SV=1
tr|A0A3S6FM15|A0A3S6FM15_RAT	13	52	175.7	16	16	572310	15	1	35	N	42698	Cytochrome b (Fragment) OS=Rattus norvegicus OX=10116 GN=Cytb PE=3 SV=1
tr|A0A220D9Z6|A0A220D9Z6_RAT	13	54	175.7	16	16	572310	15	1	35	N	43018	Cytochrome b OS=Rattus norvegicus OX=10116 PE=3 SV=1
tr|D6NSP2|D6NSP2_RAT	13	55	175.7	16	16	572310	15	1	35	N	42945	Cytochrome b (Fragment) OS=Rattus norvegicus OX=10116 GN=cytb PE=3 SV=1
tr|D6NSS6|D6NSS6_RAT	13	56	175.7	16	16	572310	15	1	35	N	42993	Cytochrome b (Fragment) OS=Rattus norvegicus OX=10116 GN=cytb PE=3 SV=1
tr|D6NSQ3|D6NSQ3_RAT	13	57	175.7	16	16	572310	15	1	35	N	43012	Cytochrome b (Fragment) OS=Rattus norvegicus OX=10116 GN=cytb PE=3 SV=1
tr|D6NSR3|D6NSR3_RAT	13	58	175.7	16	16	572310	15	1	35	N	42986	Cytochrome b (Fragment) OS=Rattus norvegicus OX=10116 GN=cytb PE=3 SV=1
tr|D6NSP4|D6NSP4_RAT	13	59	175.7	16	16	572310	15	1	35	N	43016	Cytochrome b (Fragment) OS=Rattus norvegicus OX=10116 GN=cytb PE=3 SV=1
tr|D6NSR8|D6NSR8_RAT	13	61	175.7	16	16	572310	15	1	35	N	42998	Cytochrome b (Fragment) OS=Rattus norvegicus OX=10116 GN=cytb PE=3 SV=1
tr|F8QU37|F8QU37_RAT	13	62	175.7	16	16	572310	15	1	35	N	42992	Cytochrome b (Fragment) OS=Rattus norvegicus OX=10116 GN=cytb PE=3 SV=1
tr|F2Q6S6|F2Q6S6_RAT	13	63	175.7	16	16	572310	15	1	35	N	42938	Cytochrome b (Fragment) OS=Rattus norvegicus OX=10116 GN=cytb PE=3 SV=1
tr|A0A0A1FZ42|A0A0A1FZ42_RAT	13	64	175.7	16	16	572310	15	1	35	N	42989	Cytochrome b OS=Rattus norvegicus OX=10116 GN=CYTB PE=3 SV=1
tr|D6NSS7|D6NSS7_RAT	13	65	175.7	16	16	572310	15	1	35	N	42948	Cytochrome b (Fragment) OS=Rattus norvegicus OX=10116 GN=cytb PE=3 SV=1
tr|Q8SEY9|Q8SEY9_RAT	13	66	175.7	16	16	572310	15	1	35	N	43015	Cytochrome b OS=Rattus norvegicus OX=10116 GN=cytb PE=3 SV=1
tr|D6NSR7|D6NSR7_RAT	13	67	175.7	16	16	572310	15	1	35	N	42982	Cytochrome b (Fragment) OS=Rattus norvegicus OX=10116 GN=cytb PE=3 SV=1
tr|A0A220DA44|A0A220DA44_RAT	13	68	175.7	16	16	572310	15	1	35	N	42968	Cytochrome b OS=Rattus norvegicus OX=10116 PE=3 SV=1
tr|D6NSQ0|D6NSQ0_RAT	13	71	175.7	16	16	572310	15	1	35	N	42968	Cytochrome b (Fragment) OS=Rattus norvegicus OX=10116 GN=cytb PE=3 SV=1
tr|Q5UAI7|Q5UAI7_RAT	13	72	175.7	16	16	572310	15	1	35	N	42998	Cytochrome b OS=Rattus norvegicus OX=10116 GN=CYTB PE=3 SV=1
tr|D6NSR2|D6NSR2_RAT	13	73	175.7	16	16	572310	15	1	35	N	43073	Cytochrome b (Fragment) OS=Rattus norvegicus OX=10116 GN=cytb PE=3 SV=1
tr|A0A0S1Z1V9|A0A0S1Z1V9_RAT	13	74	175.7	16	16	572310	15	1	35	N	43002	Cytochrome b OS=Rattus norvegicus OX=10116 GN=CYTB PE=3 SV=1
tr|D6NSR1|D6NSR1_RAT	13	75	175.7	16	16	572310	15	1	35	N	43002	Cytochrome b (Fragment) OS=Rattus norvegicus OX=10116 GN=cytb PE=3 SV=1
tr|Q8HIC4|Q8HIC4_RAT	13	76	175.7	16	16	572310	15	1	35	N	43012	Cytochrome b OS=Rattus norvegicus OX=10116 GN=Mt-cyb PE=3 SV=1
tr|A0A220DA02|A0A220DA02_RAT	13	77	175.7	16	16	572310	15	1	35	N	42968	Cytochrome b OS=Rattus norvegicus OX=10116 PE=3 SV=1
tr|A0A0S1Z1V4|A0A0S1Z1V4_RAT	13	78	175.7	16	16	572310	15	1	35	N	43016	Cytochrome b OS=Rattus norvegicus OX=10116 GN=CYTB PE=3 SV=1
tr|R9TKN1|R9TKN1_RAT	13	119	175.7	16	16	572310	15	1	35	N	43012	Cytochrome b OS=Rattus norvegicus OX=10116 GN=CYTB PE=3 SV=1
P00159|CYB_RAT	13	79	175.7	16	16	572310	15	1	35	N	43012	Cytochrome b OS=Rattus norvegicus OX=10116 GN=Mt-Cyb PE=3 SV=3
tr|L0N311|L0N311_RAT	13	80	175.7	16	16	572310	15	1	35	N	43045	Cytochrome b (Fragment) OS=Rattus norvegicus OX=10116 GN=cytb PE=3 SV=1
tr|A0A220DA28|A0A220DA28_RAT	13	81	175.7	16	16	572310	15	1	35	N	42970	Cytochrome b OS=Rattus norvegicus OX=10116 PE=3 SV=1
tr|H2KXA0|H2KXA0_RAT	13	82	175.7	16	16	572310	15	1	35	N	42978	Cytochrome b (Fragment) OS=Rattus norvegicus OX=10116 GN=cytb PE=3 SV=1
tr|A0A096XNM4|A0A096XNM4_RAT	13	83	175.7	16	16	572310	15	1	35	N	43042	Cytochrome b (Fragment) OS=Rattus norvegicus OX=10116 PE=3 SV=1
tr|D6NSP5|D6NSP5_RAT	13	120	175.7	16	16	572310	15	1	35	N	43012	Cytochrome b (Fragment) OS=Rattus norvegicus OX=10116 GN=cytb PE=3 SV=1
Q9ER34|ACON_RAT	17	88	175.14	13	13	3358900	17	17	27	N	85433	Aconitate hydratase, mitochondrial OS=Rattus norvegicus OX=10116 GN=Aco2 PE=1 SV=2
tr|Q5UAJ6|Q5UAJ6_RAT	6	24	173.47	49	49	10697000	33	33	60	Y	25942	Cytochrome c oxidase subunit 2 OS=Rattus norvegicus OX=10116 GN=COX2 PE=3 SV=1
P14882|PCCA_RAT	14	2783	161.44	16	16	2493200	19	17	32	Y	81623	Propionyl-CoA carboxylase alpha chain, mitochondrial OS=Rattus norvegicus OX=10116 GN=Pcca PE=1 SV=3
tr|A0A385HC93|A0A385HC93_RAT	15	212	161.08	16	16	46246	15	1	32	N	42751	Cytochrome b (Fragment) OS=Rattus norvegicus OX=10116 PE=3 SV=1
tr|A0A0G2JVH4|A0A0G2JVH4_RAT	18	147	134.38	14	14	3172100	15	15	23	Y	86230	MICOS complex subunit MIC60 OS=Rattus norvegicus OX=10116 GN=Immt PE=1 SV=1
P10817|CX6A2_RAT	27	151	129.89	15	15	2204700	5	5	10	N	10487	Cytochrome c oxidase subunit 6A2, mitochondrial (Fragment) OS=Rattus norvegicus OX=10116 GN=Cox6a2 PE=1 SV=3
tr|G3V8M4|G3V8M4_RAT	27	152	129.89	14	14	2204700	5	5	10	N	10802	Cytochrome c oxidase subunit 6A, mitochondrial OS=Rattus norvegicus OX=10116 GN=Cox6a2 PE=3 SV=1
P80431|COX7B_RAT	33	2798	121.84	29	29	1469200	6	6	7	N	8995	Cytochrome c oxidase subunit 7B, mitochondrial OS=Rattus norvegicus OX=10116 GN=Cox7b PE=1 SV=3
tr|B2RYT5|B2RYT5_RAT	20	2788	117.53	43	43	1649100	12	12	19	Y	12651	Cox7a2l protein OS=Rattus norvegicus OX=10116 GN=Cox7a2l PE=2 SV=1
Q6AXV4|SAM50_RAT	31	2803	108.68	9	9	330220	6	6	8	N	51960	Sorting and assembly machinery component 50 homolog OS=Rattus norvegicus OX=10116 GN=Samm50 PE=1 SV=1
P10888|COX41_RAT	19	290	106.92	25	25	1754300	10	10	20	Y	19515	Cytochrome c oxidase subunit 4 isoform 1, mitochondrial OS=Rattus norvegicus OX=10116 GN=Cox4i1 PE=1 SV=1
P56574|IDHP_RAT	25	2786	101.89	13	13	843110	9	9	10	N	50967	Isocitrate dehydrogenase [NADP], mitochondrial OS=Rattus norvegicus OX=10116 GN=Idh2 PE=1 SV=2
P04636|MDHM_RAT	21	561	97.44	18	18	943230	10	9	15	Y	35684	Malate dehydrogenase, mitochondrial OS=Rattus norvegicus OX=10116 GN=Mdh2 PE=1 SV=2
Q06647|ATPO_RAT	23	8	92.62	13	13	1125300	6	6	12	N	23398	ATP synthase subunit O, mitochondrial OS=Rattus norvegicus OX=10116 GN=Atp5po PE=1 SV=1
tr|Q5BJZ3|Q5BJZ3_RAT	35	1175	91.49	4	4	391640	4	4	6	N	113869	Nicotinamide nucleotide transhydrogenase OS=Rattus norvegicus OX=10116 GN=Nnt PE=1 SV=1
P17764|THIL_RAT	28	2787	88.78	15	15	766390	7	7	9	N	44695	Acetyl-CoA acetyltransferase, mitochondrial OS=Rattus norvegicus OX=10116 GN=Acat1 PE=1 SV=1
P45953|ACADV_RAT	26	503	88.01	8	8	1324300	6	6	10	N	70749	Very long-chain specific acyl-CoA dehydrogenase, mitochondrial OS=Rattus norvegicus OX=10116 GN=Acadvl PE=1 SV=1
tr|Q5M9H2|Q5M9H2_RAT	26	504	88.01	8	8	1324300	6	6	10	N	70821	Acyl-Coenzyme A dehydrogenase, very long chain OS=Rattus norvegicus OX=10116 GN=Acadvl PE=1 SV=1
P12075|COX5B_RAT	22	139	86.99	22	22	6260800	6	6	15	Y	13915	Cytochrome c oxidase subunit 5B, mitochondrial OS=Rattus norvegicus OX=10116 GN=Cox5b PE=1 SV=2
Q6PDU7|ATP5L_RAT	34	11	85.86	26	26	666270	3	3	6	Y	11433	ATP synthase subunit g, mitochondrial OS=Rattus norvegicus OX=10116 GN=Atp5mg PE=1 SV=2
tr|Q06QA9|Q06QA9_RAT	29	2790	82.74	7	7	602690	5	5	9	Y	56893	Cytochrome c oxidase subunit 1 OS=Rattus norvegicus OX=10116 GN=CO1 PE=3 SV=1
tr|Q06QK0|Q06QK0_RAT	29	2791	82.74	7	7	602690	5	5	9	Y	56880	Cytochrome c oxidase subunit 1 OS=Rattus norvegicus OX=10116 GN=CO1 PE=3 SV=1
tr|Q8SEZ6|Q8SEZ6_RAT	29	2792	82.74	7	7	602690	5	5	9	Y	56879	Cytochrome c oxidase subunit 1 OS=Rattus norvegicus OX=10116 GN=COI PE=3 SV=1
tr|A0A0A1FZ34|A0A0A1FZ34_RAT	29	2793	82.74	7	7	602690	5	5	9	Y	56937	Cytochrome c oxidase subunit 1 OS=Rattus norvegicus OX=10116 GN=COX1 PE=3 SV=1
tr|Q8HIC9|Q8HIC9_RAT	29	2794	82.74	7	7	602690	5	5	9	Y	56845	Cytochrome c oxidase subunit 1 OS=Rattus norvegicus OX=10116 GN=Mt-co1 PE=3 SV=1
P05503|COX1_RAT	29	2795	82.74	7	7	602690	5	5	9	Y	56845	Cytochrome c oxidase subunit 1 OS=Rattus norvegicus OX=10116 GN=Mtco1 PE=2 SV=3
tr|Q95938|Q95938_RAT	29	2796	82.74	7	7	602690	5	5	9	Y	56977	Cytochrome c oxidase subunit 1 OS=Rattus norvegicus OX=10116 GN=Co I PE=3 SV=1
tr|D3ZUX5|D3ZUX5_RAT	53	2815	80.37	9	9	426040	2	2	3	N	26435	MICOS complex subunit OS=Rattus norvegicus OX=10116 GN=Chchd3 PE=1 SV=1
P11507|AT2A2_RAT	49	2797	78.39	3	3	308840	3	3	3	N	114768	Sarcoplasmic/endoplasmic reticulum calcium ATPase 2 OS=Rattus norvegicus OX=10116 GN=Atp2a2 PE=1 SV=1
tr|G3V7I0|G3V7I0_RAT	55	2858	77.47	5	5	292970	2	2	3	N	28299	Peroxiredoxin 3 OS=Rattus norvegicus OX=10116 GN=Prdx3 PE=1 SV=1
Q9Z0V6|PRDX3_RAT	55	2859	77.47	5	5	292970	2	2	3	N	28295	Thioredoxin-dependent peroxide reductase, mitochondrial OS=Rattus norvegicus OX=10116 GN=Prdx3 PE=1 SV=2
P19511|AT5F1_RAT	32	10	76.7	9	9	2794800	3	3	7	N	28869	ATP synthase F(0) complex subunit B1, mitochondrial OS=Rattus norvegicus OX=10116 GN=Atp5pb PE=1 SV=1
P11951|CX6C2_RAT	39	2816	75.09	22	22	875870	3	3	5	N	8455	Cytochrome c oxidase subunit 6C-2 OS=Rattus norvegicus OX=10116 GN=Cox6c2 PE=1 SV=3
tr|Q5UAJ5|Q5UAJ5_RAT	40	32	74.57	19	19	2120600	3	3	5	Y	7642	ATP synthase protein 8 OS=Rattus norvegicus OX=10116 GN=ATP8 PE=3 SV=1
P11608|ATP8_RAT	40	35	74.57	19	19	2120600	3	3	5	Y	7630	ATP synthase protein 8 OS=Rattus norvegicus OX=10116 GN=Mt-atp8 PE=1 SV=2
tr|Q8SEZ4|Q8SEZ4_RAT	40	33	74.57	19	19	2120600	3	3	5	Y	7632	ATP synthase protein 8 OS=Rattus norvegicus OX=10116 GN=ATPase8 PE=3 SV=1
tr|Q8HIC8|Q8HIC8_RAT	40	36	74.57	19	19	2120600	3	3	5	Y	7630	ATP synthase protein 8 OS=Rattus norvegicus OX=10116 GN=Mt-atp8 PE=3 SV=1
P07633|PCCB_RAT	24	2799	74.26	7	7	988350	5	5	10	N	58626	Propionyl-CoA carboxylase beta chain, mitochondrial OS=Rattus norvegicus OX=10116 GN=Pccb PE=2 SV=1
tr|Q68FZ8|Q68FZ8_RAT	24	2800	74.26	7	7	988350	5	5	10	N	58678	Propionyl coenzyme A carboxylase, beta polypeptide OS=Rattus norvegicus OX=10116 GN=Pccb PE=1 SV=1
tr|F1LP30|F1LP30_RAT	54	2818	72.91	3	3	36580	2	1	3	N	79296	Methylcrotonoyl-CoA carboxylase subunit alpha, mitochondrial OS=Rattus norvegicus OX=10116 GN=Mccc1 PE=1 SV=1
Q5I0C3|MCCA_RAT	54	2819	72.91	3	3	36580	2	1	3	N	79330	Methylcrotonoyl-CoA carboxylase subunit alpha, mitochondrial OS=Rattus norvegicus OX=10116 GN=Mccc1 PE=1 SV=1
P52873|PYC_RAT	45	2805	70.08	3	3	79061	3	2	4	N	129777	Pyruvate carboxylase, mitochondrial OS=Rattus norvegicus OX=10116 GN=Pc PE=1 SV=2
tr|A0A0G2JTL5|A0A0G2JTL5_RAT	45	2806	70.08	2	2	79061	3	2	4	N	140005	Pyruvate carboxylase, mitochondrial OS=Rattus norvegicus OX=10116 GN=Pc PE=1 SV=1
tr|B2RYS8|B2RYS8_RAT	119	2857	69.95	8	8	134770	1	1	1	N	21959	NADH dehydrogenase [ubiquinone] 1 beta subcomplex subunit 8, mitochondrial OS=Rattus norvegicus OX=10116 GN=Ndufb8 PE=1 SV=1
P09605|KCRS_RAT	43	84	69.38	5	5	176570	2	2	4	N	47385	Creatine kinase S-type, mitochondrial OS=Rattus norvegicus OX=10116 GN=Ckmt2 PE=1 SV=2
tr|Q7H115|Q7H115_RAT	36	2862	68.69	3	3	859140	2	2	6	N	29871	Cytochrome c oxidase subunit 3 OS=Rattus norvegicus OX=10116 GN=Mt-co3 PE=3 SV=1
tr|I6V4L9|I6V4L9_RAT	36	2863	68.69	3	3	859140	2	2	6	N	29844	Cytochrome c oxidase subunit 3 OS=Rattus norvegicus OX=10116 GN=COX3 PE=3 SV=1
tr|Q8M7G4|Q8M7G4_RAT	36	2864	68.69	3	3	859140	2	2	6	N	29861	Cytochrome c oxidase subunit 3 OS=Rattus norvegicus OX=10116 PE=2 SV=1
tr|A0A096XKT2|A0A096XKT2_RAT	36	2865	68.69	3	3	859140	2	2	6	N	29901	Cytochrome c oxidase subunit 3 OS=Rattus norvegicus OX=10116 GN=COX3 PE=3 SV=1
P05505|COX3_RAT	36	2866	68.69	3	3	859140	2	2	6	N	29871	Cytochrome c oxidase subunit 3 OS=Rattus norvegicus OX=10116 GN=Mtco3 PE=1 SV=5
tr|Q8SEZ2|Q8SEZ2_RAT	36	2867	68.69	3	3	859140	2	2	6	N	29870	Cytochrome c oxidase subunit 3 (Fragment) OS=Rattus norvegicus OX=10116 GN=COIII PE=3 SV=1
tr|B1WBP7|B1WBP7_RAT	51	25	68.23	18	18	853760	2	2	3	Y	12884	ATP synthase subunit delta, mitochondrial OS=Rattus norvegicus OX=10116 GN=Atp5f1d PE=1 SV=1
tr|G3V7Y3|G3V7Y3_RAT	51	12	68.23	13	13	853760	2	2	3	Y	17563	ATP synthase subunit delta, mitochondrial OS=Rattus norvegicus OX=10116 GN=Atp5f1d PE=1 SV=1
P35434|ATPD_RAT	51	18	68.23	13	13	853760	2	2	3	Y	17595	ATP synthase subunit delta, mitochondrial OS=Rattus norvegicus OX=10116 GN=Atp5f1d PE=1 SV=2
Q02253|MMSA_RAT	30	2801	67.09	12	12	798110	7	7	8	Y	57808	Methylmalonate-semialdehyde dehydrogenase [acylating], mitochondrial OS=Rattus norvegicus OX=10116 GN=Aldh6a1 PE=1 SV=1
tr|G3V7J0|G3V7J0_RAT	30	2802	67.09	12	12	798110	7	7	8	Y	57748	Aldehyde dehydrogenase family 6, subfamily A1, isoform CRA_b OS=Rattus norvegicus OX=10116 GN=Aldh6a1 PE=1 SV=1
P85834|EFTU_RAT	96	2827	66.18	3	3	57920	1	1	1	N	49522	Elongation factor Tu, mitochondrial OS=Rattus norvegicus OX=10116 GN=Tufm PE=1 SV=1
P08461|ODP2_RAT	44	2804	50.17	4	4	262470	3	3	4	N	67166	Dihydrolipoyllysine-residue acetyltransferase component of pyruvate dehydrogenase complex, mitochondrial OS=Rattus norvegicus OX=10116 GN=Dlat PE=1 SV=3
P35171|CX7A2_RAT	37	1062	49.4	14	14	283320	2	2	6	N	9353	Cytochrome c oxidase subunit 7A2, mitochondrial OS=Rattus norvegicus OX=10116 GN=Cox7a2 PE=1 SV=1
tr|B2RYS0|B2RYS0_RAT	37	1063	49.4	14	14	283320	2	2	6	N	9353	Cox7a2 protein OS=Rattus norvegicus OX=10116 GN=Cox7a2 PE=2 SV=1
tr|D3ZG43|D3ZG43_RAT	50	2807	48.84	6	6	406480	2	2	3	N	30226	NADH dehydrogenase (Ubiquinone) Fe-S protein 3 (Predicted), isoform CRA_c OS=Rattus norvegicus OX=10116 GN=Ndufs3 PE=1 SV=1
P80432|COX7C_RAT	65	134	47.77	21	21	134270	1	1	2	N	7375	Cytochrome c oxidase subunit 7C, mitochondrial OS=Rattus norvegicus OX=10116 GN=Cox7c PE=1 SV=2
P63039|CH60_RAT	70	142	47.17	2	2	412190	2	2	2	N	60956	60 kDa heat shock protein, mitochondrial OS=Rattus norvegicus OX=10116 GN=Hspd1 PE=1 SV=1
tr|A0A482IDN3|A0A482IDN3_RAT	70	143	47.17	2	2	412190	2	2	2	N	60956	Hsp60 OS=Rattus norvegicus OX=10116 GN=Hspd1 PE=2 SV=1
tr|D4A7L4|D4A7L4_RAT	68	2872	46.96	9	9	201230	2	2	2	N	17634	NADH dehydrogenase (Ubiquinone) 1 beta subcomplex, 11 (Predicted) OS=Rattus norvegicus OX=10116 GN=Ndufb11 PE=1 SV=1
Q63704|CPT1B_RAT	62	138	45.37	2	2	215760	1	1	2	N	88217	Carnitine O-palmitoyltransferase 1, muscle isoform OS=Rattus norvegicus OX=10116 GN=Cpt1b PE=1 SV=1
tr|Q5PQZ9|Q5PQZ9_RAT	59	2821	45.37	19	19	194600	2	2	2	N	14359	NADH dehydrogenase [ubiquinone] 1 subunit C2 OS=Rattus norvegicus OX=10116 GN=Ndufc2 PE=1 SV=1
tr|B2RZD6|B2RZD6_RAT	42	568	45.17	21	21	366830	3	3	4	N	9327	NDUFA4, mitochondrial complex-associated OS=Rattus norvegicus OX=10116 GN=Ndufa4 PE=1 SV=1
P02770|ALBU_RAT	97	2832	38.54	1	1	83100	1	1	1	Y	68731	Serum albumin OS=Rattus norvegicus OX=10116 GN=Alb PE=1 SV=2
tr|A0A0G2JSH5|A0A0G2JSH5_RAT	97	2833	38.54	1	1	83100	1	1	1	Y	68759	Serum albumin OS=Rattus norvegicus OX=10116 GN=Alb PE=1 SV=1
P19234|NDUV2_RAT	120	2870	36.42	6	6	67052	1	1	1	N	27378	NADH dehydrogenase [ubiquinone] flavoprotein 2, mitochondrial OS=Rattus norvegicus OX=10116 GN=Ndufv2 PE=1 SV=2
tr|A0A0G2JYU2|A0A0G2JYU2_RAT	52	2830	35.54	4	4	225440	1	1	3	N	20750	Mitochondrial ribosomal protein L11 OS=Rattus norvegicus OX=10116 GN=mrpl11 PE=1 SV=1
Q5XIE3|RM11_RAT	52	2831	35.54	4	4	225440	1	1	3	N	22420	39S ribosomal protein L11, mitochondrial OS=Rattus norvegicus OX=10116 GN=Mrpl11 PE=2 SV=1
Q5HZA9|T126A_RAT	121	2871	35.32	5	5	83601	1	1	1	N	21657	Transmembrane protein 126A OS=Rattus norvegicus OX=10116 GN=Tmem126a PE=2 SV=1
P13086|SUCA_RAT	60	2822	35.23	7	7	82652	2	2	2	N	36148	Succinate--CoA ligase [ADP/GDP-forming] subunit alpha, mitochondrial OS=Rattus norvegicus OX=10116 GN=Suclg1 PE=2 SV=2
tr|A0A0H2UHE1|A0A0H2UHE1_RAT	60	2823	35.23	6	6	82652	2	2	2	N	37560	Succinate--CoA ligase [ADP/GDP-forming] subunit alpha, mitochondrial OS=Rattus norvegicus OX=10116 GN=Suclg1 PE=1 SV=1
tr|B2RZ57|B2RZ57_RAT	74	2880	33.43	8	8	144400	2	2	2	N	20651	Mitochondrial ribosomal protein L18 OS=Rattus norvegicus OX=10116 GN=Mrpl18 PE=1 SV=1
tr|D4A0T0|D4A0T0_RAT	69	180	32.98	10	10	442030	1	1	2	N	20859	NADH:ubiquinone oxidoreductase subunit B10 OS=Rattus norvegicus OX=10116 GN=Ndufb10 PE=1 SV=1
P26284|ODPA_RAT	61	2826	32.88	5	5	193430	2	2	2	N	43227	Pyruvate dehydrogenase E1 component subunit alpha, somatic form, mitochondrial OS=Rattus norvegicus OX=10116 GN=Pdha1 PE=1 SV=2
Q7TQ16|QCR8_RAT	84	2828	29.98	10	10	173740	1	1	1	N	9849	Cytochrome b-c1 complex subunit 8 OS=Rattus norvegicus OX=10116 GN=Uqcrq PE=3 SV=1
tr|A9UMV7|A9UMV7_RAT	71	2873	29.5	11	11	121680	1	1	2	N	6539	RCG29512 OS=Rattus norvegicus OX=10116 GN=Uqcr11 PE=1 SV=1
P11530|DMD_RAT	78	333	29.47	0	0	100010	2	2	2	N	425830	Dystrophin OS=Rattus norvegicus OX=10116 GN=Dmd PE=1 SV=2
Q5XIN6|LETM1_RAT	63	2855	27.95	2	2	215100	1	1	2	N	83060	Mitochondrial proton/calcium exchanger protein OS=Rattus norvegicus OX=10116 GN=Letm1 PE=1 SV=1
Q4V8F9|HSDL2_RAT	72	121	27.91	2	2	149350	1	1	2	N	58344	Hydroxysteroid dehydrogenase-like protein 2 OS=Rattus norvegicus OX=10116 GN=Hsdl2 PE=2 SV=1
Q641Y2|NDUS2_RAT	64	2856	27.68	4	4	216330	2	2	2	N	52562	NADH dehydrogenase [ubiquinone] iron-sulfur protein 2, mitochondrial OS=Rattus norvegicus OX=10116 GN=Ndufs2 PE=1 SV=1
tr|M0R5K3|M0R5K3_RAT	123	2876	44557	10	10	49381	1	1	1	N	9028	Cytochrome c oxidase subunit 7A1 OS=Rattus norvegicus OX=10116 GN=LOC687508 PE=4 SV=1
Q5M9I5|QCR6_RAT	122	2875	44282	12	12	162270	1	1	1	N	10424	Cytochrome b-c1 complex subunit 6, mitochondrial OS=Rattus norvegicus OX=10116 GN=Uqcrh PE=3 SV=1
tr|B2RZ24|B2RZ24_RAT	99	2877	26.7	4	4	42281	1	1	1	N	47388	Succinate-CoA ligase subunit beta (Fragment) OS=Rattus norvegicus OX=10116 GN=Sucla2 PE=2 SV=1
tr|F1LM47|F1LM47_RAT	99	2878	26.7	4	4	42281	1	1	1	N	50306	Succinate--CoA ligase [ADP-forming] subunit beta, mitochondrial OS=Rattus norvegicus OX=10116 GN=Sucla2 PE=1 SV=1
tr|D3ZD09|D3ZD09_RAT	73	2879	25.72	12	12	138060	1	1	2	N	10071	Cytochrome c oxidase subunit OS=Rattus norvegicus OX=10116 GN=Cox6b1 PE=1 SV=1
P07895|SODM_RAT	124	2881	25.47	4	4	49403	1	1	1	N	24674	Superoxide dismutase [Mn], mitochondrial OS=Rattus norvegicus OX=10116 GN=Sod2 PE=1 SV=2
tr|Q6P9Y4|Q6P9Y4_RAT	82	1009	25.26	3	3	193010	1	1	1	N	32904	ADP/ATP translocase 1 OS=Rattus norvegicus OX=10116 GN=Slc25a4 PE=1 SV=1
Q05962|ADT1_RAT	82	1010	25.26	3	3	193010	1	1	1	N	32989	ADP/ATP translocase 1 OS=Rattus norvegicus OX=10116 GN=Slc25a4 PE=1 SV=3
Q09073|ADT2_RAT	82	1011	25.26	3	3	193010	1	1	1	N	32901	ADP/ATP translocase 2 OS=Rattus norvegicus OX=10116 GN=Slc25a5 PE=1 SV=3
tr|D3Z900|D3Z900_RAT	126	2885	2021-03-24	3	3	0	1	1	1	Y	38239	Mitochondrial amidoxime reducing component 2 OS=Rattus norvegicus OX=10116 GN=Marc2 PE=1 SV=2
O88994|MARC2_RAT	126	2886	2021-03-24	3	3	0	1	1	1	Y	38249	Mitochondrial amidoxime reducing component 2 OS=Rattus norvegicus OX=10116 GN=Marc2 PE=2 SV=1
tr|M0R6N2|M0R6N2_RAT	126	2887	2021-03-24	3	3	0	1	1	1	Y	38175	MOSC domain-containing protein 2, mitochondrial-like OS=Rattus norvegicus OX=10116 GN=LOC100910481 PE=1 SV=1
