# Supplementary material for: Mitochondrial F-ATP Synthase Co-Migrating Proteins and Ca2+-Dependent Formation of Large Channels
Source: Cells. 2023 Oct 7;12(19):2414. doi: 10.3390/cells12192414 (PMC10572550; doi:10.3390/cells12192414)
Supplement: Supplementary file 1 [file cells-12-02414-s001.zip › Dataset S9.xlsx]

## Sheet: RLM SM-BM Cont I-III(2)-IV(H)
Protein Group	Protein ID	Accession	-10lgP	Coverage (%)	Coverage (%) Sample 1	IBAQ	#Peptides	#Unique	#Spec Sample 1	PTM	Avg. Mass	Description
1	1	Q02253|MMSA_RAT	421.37	77	77	178060000	160	159	269	Carbamidomethylation		Methylmalonate-semialdehyde dehydrogenase [acylating], mitochondrial
1	2	tr|G3V7J0|G3V7J0_RAT	421.37	77	77	178060000	160	159	269	Carbamidomethylation		Methylmalonate-semialdehyde dehydrogenase [acylating], mitochondrial
2	3	tr|B2GV15|B2GV15_RAT	385.64	64	64	206960000	138	138	251	Oxidation (M)	53274	Dihydrolipoamide acetyltransferase component of pyruvate dehydrogenase complex OS=Rattus norvegicus OX=10116 GN=Dbt PE=1 SV=1
3	5	tr|G3V6P2|G3V6P2_RAT	338.24	62	62	106240000	87	87	152	Oxidation (M)	48899	Dihydrolipoamide S-succinyltransferase (E2 component of 2-oxo-glutarate complex) isoform CRA_a OS=Rattus norvegicus OX=10116 GN=Dlst PE=1 SV=1
4	10	Q66HF1|NDUS1_RAT	323.83	51	51	55466000	88	88	123	Oxidation (M)	79412	NADH-ubiquinone oxidoreductase 75 kDa subunit mitochondrial OS=Rattus norvegicus OX=10116 GN=Ndufs1 PE=1 SV=1
11	9	Q5BK63|NDUA9_RAT	302.61	49	49	24972000	47	47	73	Oxidation (M)	42559	NADH dehydrogenase [ubiquinone] 1 alpha subcomplex subunit 9 mitochondrial OS=Rattus norvegicus OX=10116 GN=Ndufa9 PE=1 SV=2
9	7	Q4FZT0|STML2_RAT	301.36	63	63	36116000	58	58	81	Oxidation (M)	38414	Stomatin-like protein 2 mitochondrial OS=Rattus norvegicus OX=10116 GN=Stoml2 PE=1 SV=1
5	13	P32551|QCR2_RAT	301.28	60	60	62909000	76	76	121	Oxidation (M)	48396	Cytochrome b-c1 complex subunit 2 mitochondrial OS=Rattus norvegicus OX=10116 GN=Uqcrc2 PE=1 SV=2
10	8	P07756|CPSM_RAT	295.66	32	32	24577000	64	64	79	Oxidation (M)	164579	Carbamoyl-phosphate synthase [ammonia] mitochondrial OS=Rattus norvegicus OX=10116 GN=Cps1 PE=1 SV=1
8	30	P19234|NDUV2_RAT	293.35	47	47	45081000	46	45	81	Formylation	27378	NADH dehydrogenase [ubiquinone] flavoprotein 2 mitochondrial OS=Rattus norvegicus OX=10116 GN=Ndufv2 PE=1 SV=2
7	11	P67779|PHB_RAT	290.16	81	81	54220000	65	65	96		29820	Prohibitin OS=Rattus norvegicus OX=10116 GN=Phb PE=1 SV=1
17	22	tr|D3ZFQ8|D3ZFQ8_RAT	283.17	43	43	36962000	36	36	52	Oxidation (M)	35435	Cytochrome c-1 OS=Rattus norvegicus OX=10116 GN=Cyc1 PE=1 SV=3
6	12	Q68FY0|QCR1_RAT	281.35	50	50	66322000	76	76	118	Oxidation (M)	52849	Cytochrome b-c1 complex subunit 1 mitochondrial OS=Rattus norvegicus OX=10116 GN=Uqcrc1 PE=1 SV=1
18	29	P07895|SODM_RAT	270.29	61	61	33275000	30	30	48		24674	Superoxide dismutase [Mn] mitochondrial OS=Rattus norvegicus OX=10116 GN=Sod2 PE=1 SV=2
32	45	tr|B2RYS8|B2RYS8_RAT	259.39	46	46	10525000	21	21	25	Oxidation (M)	21959	NADH dehydrogenase [ubiquinone] 1 beta subcomplex subunit 8 mitochondrial OS=Rattus norvegicus OX=10116 GN=Ndufb8 PE=1 SV=1
20	17	P10719|ATPB_RAT	258.97	42	42	20045000	35	35	46	Oxidation (M)	56354	ATP synthase subunit beta mitochondrial OS=Rattus norvegicus OX=10116 GN=Atp5f1b PE=1 SV=2
20	18	tr|G3V6D3|G3V6D3_RAT	258.97	42	42	20045000	35	35	46	Oxidation (M)	56345	ATP synthase subunit beta OS=Rattus norvegicus OX=10116 GN=Atp5f1b PE=1 SV=1
14	15	P00507|AATM_RAT	258.07	54	54	27286000	44	44	58	Oxidation (M)	47314	Aspartate aminotransferase mitochondrial OS=Rattus norvegicus OX=10116 GN=Got2 PE=1 SV=2
21	16	tr|F1LN92|F1LN92_RAT	251.05	30	30	12495000	38	37	43	Oxidation (M)	89352	AFG3-like matrix AAA peptidase subunit 2 OS=Rattus norvegicus OX=10116 GN=Afg3l2 PE=1 SV=1
24	14	P10860|DHE3_RAT	248.69	33	33	11732000	31	31	37	Oxidation (M)	61416	Glutamate dehydrogenase 1 mitochondrial OS=Rattus norvegicus OX=10116 GN=Glud1 PE=1 SV=2
19	20	P15999|ATPA_RAT	242.36	38	38	14170000	37	37	47	Oxidation (M)	59754	ATP synthase subunit alpha mitochondrial OS=Rattus norvegicus OX=10116 GN=Atp5f1a PE=1 SV=2
19	21	tr|F1LP05|F1LP05_RAT	242.36	38	38	14170000	37	37	47	Oxidation (M)	59813	ATP synthase subunit alpha OS=Rattus norvegicus OX=10116 GN=Atp5f1a PE=1 SV=1
26	42	tr|D4A0T0|D4A0T0_RAT	238.01	54	54	12843000	18	18	32	Oxidation (M)	20859	NADH:ubiquinone oxidoreductase subunit B10 OS=Rattus norvegicus OX=10116 GN=Ndufb10 PE=1 SV=1
13	19	Q5XIH7|PHB2_RAT	235.74	57	57	27551000	45	45	66	Oxidation (M)	33312	Prohibitin-2 OS=Rattus norvegicus OX=10116 GN=Phb2 PE=1 SV=1
27	164	tr|D3ZF13|D3ZF13_RAT	231.88	38	38	15809000	21	21	32	Oxidation (M)	17514	Acyl carrier protein OS=Rattus norvegicus OX=10116 GN=Ndufab1 PE=1 SV=1
16	26	Q641Y2|NDUS2_RAT	224.67	42	42	23383000	35	35	53	Oxidation (M)	52562	NADH dehydrogenase [ubiquinone] iron-sulfur protein 2 mitochondrial OS=Rattus norvegicus OX=10116 GN=Ndufs2 PE=1 SV=1
22	23	tr|Q5XIH3|Q5XIH3_RAT	223.96	34	34	16564000	28	28	43	Oxidation (M)	50731	NADH dehydrogenase [ubiquinone] flavoprotein 1 mitochondrial OS=Rattus norvegicus OX=10116 GN=Ndufv1 PE=1 SV=1
15	24	tr|D3ZG43|D3ZG43_RAT	223.17	63	63	21013000	36	36	53		30226	NADH dehydrogenase (Ubiquinone) Fe-S protein 3 (Predicted) isoform CRA_c OS=Rattus norvegicus OX=10116 GN=Ndufs3 PE=1 SV=1
29	80	P20788|UCRI_RAT	222.59	41	41	12944000	19	19	28	Oxidation (M)	29446	Cytochrome b-c1 complex subunit Rieske mitochondrial OS=Rattus norvegicus OX=10116 GN=Uqcrfs1 PE=1 SV=2
33	179	P11240|COX5A_RAT	218.25	48	48	10992000	17	17	25		16130	Cytochrome c oxidase subunit 5A mitochondrial OS=Rattus norvegicus OX=10116 GN=Cox5a PE=1 SV=1
30	110	tr|A0A0G2JVL6|A0A0G2JVL6_RAT	216.77	38	38	11962000	18	18	28		19965	NADH dehydrogenase [ubiquinone] 1 alpha subcomplex subunit 8 OS=Rattus norvegicus OX=10116 GN=Ndufa8 PE=1 SV=1
25	44	tr|D6NSR7|D6NSR7_RAT	212.55	28	28	14231000	25	25	34	Oxidation (M)		Cytochrome b
25	46	tr|L0L4L8|L0L4L8_RAT	212.55	28	28	14231000	25	25	34	Oxidation (M)
25	47	tr|A0A140GE10|A0A140GE10_RAT	212.55	28	28	14231000	25	25	34	Oxidation (M)
25	48	tr|A0A140GE11|A0A140GE11_RAT	212.55	28	28	14231000	25	25	34	Oxidation (M)
25	49	tr|A0A3Q8AGE8|A0A3Q8AGE8_RAT	212.55	28	28	14231000	25	25	34	Oxidation (M)
25	50	tr|A0A3Q8AC68|A0A3Q8AC68_RAT	212.55	28	28	14231000	25	25	34	Oxidation (M)
25	51	tr|A0A3S6FM15|A0A3S6FM15_RAT	212.55	28	28	14231000	25	25	34	Oxidation (M)
25	52	tr|A0A220D9Z6|A0A220D9Z6_RAT	212.55	28	28	14231000	25	25	34	Oxidation (M)
25	53	tr|D6NSS6|D6NSS6_RAT	212.55	28	28	14231000	25	25	34	Oxidation (M)
25	54	tr|D6NSR3|D6NSR3_RAT	212.55	28	28	14231000	25	25	34	Oxidation (M)
25	55	tr|D6NSR8|D6NSR8_RAT	212.55	28	28	14231000	25	25	34	Oxidation (M)
25	56	tr|A0A0A1FZ42|A0A0A1FZ42_RAT	212.55	28	28	14231000	25	25	34	Oxidation (M)
25	57	tr|D6NSS7|D6NSS7_RAT	212.55	28	28	14231000	25	25	34	Oxidation (M)
25	58	tr|Q8SEY9|Q8SEY9_RAT	212.55	28	28	14231000	25	25	34	Oxidation (M)
25	59	tr|A0A220DA44|A0A220DA44_RAT	212.55	28	28	14231000	25	25	34	Oxidation (M)
25	60	tr|D6NSQ0|D6NSQ0_RAT	212.55	28	28	14231000	25	25	34	Oxidation (M)
25	61	tr|Q5UAI7|Q5UAI7_RAT	212.55	28	28	14231000	25	25	34	Oxidation (M)
25	62	tr|Q8HIC4|Q8HIC4_RAT	212.55	28	28	14231000	25	25	34	Oxidation (M)
25	63	tr|A0A220DA02|A0A220DA02_RAT	212.55	28	28	14231000	25	25	34	Oxidation (M)
25	64	tr|A0A0S1Z1V4|A0A0S1Z1V4_RAT	212.55	28	28	14231000	25	25	34	Oxidation (M)
25	65	P00159|CYB_RAT	212.55	28	28	14231000	25	25	34	Oxidation (M)
25	66	tr|L0N311|L0N311_RAT	212.55	28	28	14231000	25	25	34	Oxidation (M)
25	67	tr|A0A220DA28|A0A220DA28_RAT	212.55	28	28	14231000	25	25	34	Oxidation (M)
25	68	tr|H2KXA0|H2KXA0_RAT	212.55	28	28	14231000	25	25	34	Oxidation (M)
23	28	Q561S0|NDUAA_RAT	207.81	38	38	11638000	22	22	38	Oxidation (M)	40493	NADH dehydrogenase [ubiquinone] 1 alpha subcomplex subunit 10 mitochondrial OS=Rattus norvegicus OX=10116 GN=Ndufa10 PE=1 SV=1
37	135	tr|B0BNE6|B0BNE6_RAT	205.64	27	27	5325100	14	14	20		23970	NADH dehydrogenase (Ubiquinone) Fe-S protein 8 (Predicted) isoform CRA_a OS=Rattus norvegicus OX=10116 GN=Ndufs8 PE=1 SV=1
31	36	tr|Q06QK5|Q06QK5_RAT	203.86	18	18	6938100	21	21	25	Oxidation (M)	68606	NADH-ubiquinone oxidoreductase chain 5 OS=Rattus norvegicus OX=10116 GN=ND5 PE=3 SV=1
31	37	P11661|NU5M_RAT	203.86	18	18	6938100	21	21	25	Oxidation (M)	68618	NADH-ubiquinone oxidoreductase chain 5 OS=Rattus norvegicus OX=10116 GN=Mtnd5 PE=3 SV=3
31	38	tr|Q06QA1|Q06QA1_RAT	203.86	18	18	6938100	21	21	25	Oxidation (M)	68574	NADH-ubiquinone oxidoreductase chain 5 OS=Rattus norvegicus OX=10116 GN=ND5 PE=3 SV=1
31	39	tr|Q8SEZ0|Q8SEZ0_RAT	203.86	18	18	6938100	21	21	25	Oxidation (M)	68618	NADH-ubiquinone oxidoreductase chain 5 OS=Rattus norvegicus OX=10116 GN=Mt-nd5 PE=3 SV=1
31	40	tr|A0A096XKT9|A0A096XKT9_RAT	203.86	18	18	6938100	21	21	25	Oxidation (M)	68584	NADH-ubiquinone oxidoreductase chain 5 OS=Rattus norvegicus OX=10116 GN=ND5 PE=3 SV=1
43	133	tr|F1LPG5|F1LPG5_RAT	200.05	51	51	8287400	14	14	17		15064	NADH:ubiquinone oxidoreductase subunit B4 OS=Rattus norvegicus OX=10116 GN=Ndufb4 PE=1 SV=1
28	41	tr|Q5UAJ6|Q5UAJ6_RAT	198.9	51	51	9188700	24	24	28	Oxidation (M)	25942	Cytochrome c oxidase subunit 2 OS=Rattus norvegicus OX=10116 GN=COX2 PE=3 SV=1
42	165	tr|D4A565|D4A565_RAT	196.9	39	39	7630700	13	13	17		21664	NADH dehydrogenase (Ubiquinone) 1 beta subcomplex 5 (Predicted) isoform CRA_b OS=Rattus norvegicus OX=10116 GN=Ndufb5 PE=1 SV=1
48	75	P08461|ODP2_RAT	180.96	17	17	3516200	14	14	14		67166	Dihydrolipoyllysine-residue acetyltransferase component of pyruvate dehydrogenase complex mitochondrial OS=Rattus norvegicus OX=10116 GN=Dlat PE=1 SV=3
41	111	Q5XIF3|NDUS4_RAT	180.95	38	38	5935600	15	15	18	Oxidation (M)	19741	NADH dehydrogenase [ubiquinone] iron-sulfur protein 4 mitochondrial OS=Rattus norvegicus OX=10116 GN=Ndufs4 PE=1 SV=1
36	100	P17764|THIL_RAT	179.57	22	22	4587000	15	15	20		44695	Acetyl-CoA acetyltransferase mitochondrial OS=Rattus norvegicus OX=10116 GN=Acat1 PE=1 SV=1
34	34	tr|A0A0G2JTL5|A0A0G2JTL5_RAT	173.33	15	15	4533400	22	22	24	Oxidation (M)	140005	Pyruvate carboxylase mitochondrial OS=Rattus norvegicus OX=10116 GN=Pc PE=1 SV=1
45	183	tr|D4A7L4|D4A7L4_RAT	168.77	32	32	9803100	10	10	16		17634	NADH dehydrogenase (Ubiquinone) 1 beta subcomplex 11 (Predicted) OS=Rattus norvegicus OX=10116 GN=Ndufb11 PE=1 SV=1
35	112	tr|D4A3V2|D4A3V2_RAT	166.64	50	50	5239000	17	17	21	Oxidation (M)	15224	NADH dehydrogenase [ubiquinone] 1 alpha subcomplex subunit 6 OS=Rattus norvegicus OX=10116 GN=Ndufa6 PE=1 SV=1
46	123	Q5XI78|ODO1_RAT	164.66	13	13	2482200	10	10	16		116296	2-oxoglutarate dehydrogenase mitochondrial OS=Rattus norvegicus OX=10116 GN=Ogdh PE=1 SV=1
40	33	Q64428|ECHA_RAT	164.65	18	18	3419900	15	15	19		82665	Trifunctional enzyme subunit alpha mitochondrial OS=Rattus norvegicus OX=10116 GN=Hadha PE=1 SV=2
53	246	tr|Q5PQZ9|Q5PQZ9_RAT	164.55	36	36	11579000	9	9	13		14359	NADH dehydrogenase [ubiquinone] 1 subunit C2 OS=Rattus norvegicus OX=10116 GN=Ndufc2 PE=1 SV=1
38	184	tr|B2RYT5|B2RYT5_RAT	164.46	43	43	5949200	13	13	20		12651	Cox7a2l protein OS=Rattus norvegicus OX=10116 GN=Cox7a2l PE=2 SV=1
73	230	tr|B2RYS2|B2RYS2_RAT	156.38	34	34	2689100	6	6	6	Oxidation (M)	13559	Cytochrome b-c1 complex subunit 7 OS=Rattus norvegicus OX=10116 GN=Uqcrb PE=1 SV=1
52	242	Q80W89|NDUAB_RAT	152.77	21	21	5940400	9	9	14		14854	NADH dehydrogenase [ubiquinone] 1 alpha subcomplex subunit 11 OS=Rattus norvegicus OX=10116 GN=Ndufa11 PE=2 SV=1
59	168	tr|F1LXA0|F1LXA0_RAT	150.86	43	43	3045100	10	10	11		17178	NADH dehydrogenase [ubiquinone] 1 alpha subcomplex subunit 12 OS=Rattus norvegicus OX=10116 GN=Ndufa12 PE=1 SV=2
56	182	P10888|COX41_RAT	150.09	32	32	5775000	10	10	12	Oxidation (M)	19515	Cytochrome c oxidase subunit 4 isoform 1 mitochondrial OS=Rattus norvegicus OX=10116 GN=Cox4i1 PE=1 SV=1
49	76	tr|Q68G44|Q68G44_RAT	150.07	20	20	3789700	13	13	14		56886	3-hydroxy-3-methylglutaryl coenzyme A synthase OS=Rattus norvegicus OX=10116 GN=Hmgcs2 PE=1 SV=1
49	77	P22791|HMCS2_RAT	150.07	20	20	3789700	13	13	14		56912	Hydroxymethylglutaryl-CoA synthase mitochondrial OS=Rattus norvegicus OX=10116 GN=Hmgcs2 PE=1 SV=1
54	175	tr|D3ZCZ9|D3ZCZ9_RAT	146.42	51	51	4168000	9	9	13		13040	NADH dehydrogenase [ubiquinone] iron-sulfur protein 6 mitochondrial OS=Rattus norvegicus OX=10116 GN=LOC100912599 PE=1 SV=1
44	171	tr|Q8SEZ8|Q8SEZ8_RAT	144.78	21	21	3385700	11	11	16	Oxidation (M)	36133	NADH-ubiquinone oxidoreductase chain 1 (Fragment) OS=Rattus norvegicus OX=10116 GN=NADH1 PE=3 SV=1
44	172	P03889|NU1M_RAT	144.78	21	21	3385700	11	11	16	Oxidation (M)	36145	NADH-ubiquinone oxidoreductase chain 1 OS=Rattus norvegicus OX=10116 GN=Mtnd1 PE=1 SV=3
44	173	tr|Q8HID1|Q8HID1_RAT	144.78	21	21	3385700	11	11	16	Oxidation (M)	36145	NADH-ubiquinone oxidoreductase chain 1 OS=Rattus norvegicus OX=10116 GN=Mt-nd1 PE=3 SV=1
44	174	tr|D2E6L7|D2E6L7_RAT	144.78	21	21	3385700	11	11	16	Oxidation (M)	36062	NADH-ubiquinone oxidoreductase chain 1 OS=Rattus norvegicus OX=10116 GN=ND1 PE=3 SV=1
51	148	tr|Q5RJN0|Q5RJN0_RAT	144.2	31	31	3573900	11	10	14	Oxidation (M)	23945	NADH dehydrogenase (Ubiquinone) Fe-S protein 7 OS=Rattus norvegicus OX=10116 GN=Ndufs7 PE=1 SV=1
70	226	tr|D3ZXF9|D3ZXF9_RAT	137.97	18	18	702860	6	6	7		29441	Mitochondrial ribosomal protein L12 OS=Rattus norvegicus OX=10116 GN=Mrpl12 PE=1 SV=1
58	119	tr|D3ZE15|D3ZE15_RAT	130.87	45	45	2909600	9	9	11	Oxidation (M)	16777	NADH:ubiquinone oxidoreductase subunit A13 OS=Rattus norvegicus OX=10116 GN=Ndufa13 PE=1 SV=1
39	138	P05508|NU4M_RAT	129.68	22	22	3239700	16	16	20	Oxidation (M)		NADH-ubiquinone oxidoreductase chain 4
39	139	tr|D2E6K0|D2E6K0_RAT	129.68	22	22	3239700	16	16	20	Oxidation (M)
39	140	tr|Q06QE1|Q06QE1_RAT	129.68	22	22	3239700	16	16	20	Oxidation (M)
39	141	tr|Q06QA2|Q06QA2_RAT	129.68	22	22	3239700	16	16	20	Oxidation (M)
39	142	tr|Q7HKW3|Q7HKW3_RAT	129.68	22	22	3239700	16	16	20	Oxidation (M)
39	143	tr|Q06Q89|Q06Q89_RAT	129.68	22	22	3239700	16	16	20	Oxidation (M)
39	144	tr|Q35737|Q35737_RAT	129.68	22	22	3239700	16	16	20	Oxidation (M)
39	145	tr|Q8HIC6|Q8HIC6_RAT	129.68	22	22	3239700	16	16	20	Oxidation (M)
62	196	Q63362|NDUA5_RAT	127.9	39	39	3530600	7	7	11		13412	NADH dehydrogenase [ubiquinone] 1 alpha subcomplex subunit 5 OS=Rattus norvegicus OX=10116 GN=Ndufa5 PE=1 SV=3
50	176	P13086|SUCA_RAT	127.53	21	21	3197700	10	10	14		36148	Succinate--CoA ligase [ADP/GDP-forming] subunit alpha mitochondrial OS=Rattus norvegicus OX=10116 GN=Suclg1 PE=2 SV=2
50	177	tr|A0A0H2UHE1|A0A0H2UHE1_RAT	127.53	20	20	3197700	10	10	14		37560	Succinate--CoA ligase [ADP/GDP-forming] subunit alpha mitochondrial OS=Rattus norvegicus OX=10116 GN=Suclg1 PE=1 SV=1
68	228	P16970|ABCD3_RAT	127.43	8	8	2980300	7	7	7		75316	ATP-binding cassette sub-family D member 3 OS=Rattus norvegicus OX=10116 GN=Abcd3 PE=1 SV=3
79	269	P35738|ODBB_RAT	127	9	9	861590	5	5	5		42823	2-oxoisovalerate dehydrogenase subunit beta mitochondrial OS=Rattus norvegicus OX=10116 GN=Bckdhb PE=1 SV=3
79	270	tr|A0A0A0MXW1|A0A0A0MXW1_RAT	127	9	9	861590	5	5	5		42960	2-oxoisovalerate dehydrogenase subunit beta mitochondrial OS=Rattus norvegicus OX=10116 GN=Bckdhb PE=1 SV=1
64	178	tr|D3ZZ21|D3ZZ21_RAT	126.29	51	51	3983400	7	6	10	Oxidation (M)	15638	NADH dehydrogenase (Ubiquinone) 1 beta subcomplex 6 (Predicted) OS=Rattus norvegicus OX=10116 GN=Ndufb6 PE=1 SV=1
66	218	tr|M0RAM5|M0RAM5_RAT	125.48	26	26	1776100	7	7	8		22155	Glutathione peroxidase OS=Rattus norvegicus OX=10116 GN=Gpx1 PE=1 SV=1
66	219	P04041|GPX1_RAT	125.48	25	25	1776100	7	7	8		22305	Glutathione peroxidase 1 OS=Rattus norvegicus OX=10116 GN=Gpx1 PE=1 SV=4
47	169	Q60587|ECHB_RAT	124.51	21	21	3338500	12	12	15		51414	Trifunctional enzyme subunit beta mitochondrial OS=Rattus norvegicus OX=10116 GN=Hadhb PE=1 SV=1
55	153	tr|Q06QA9|Q06QA9_RAT	119.32	14	14	2915300	10	10	12		56893	Cytochrome c oxidase subunit 1 OS=Rattus norvegicus OX=10116 GN=CO1 PE=3 SV=1
55	154	tr|Q06QK0|Q06QK0_RAT	119.32	14	14	2915300	10	10	12		56880	Cytochrome c oxidase subunit 1 OS=Rattus norvegicus OX=10116 GN=CO1 PE=3 SV=1
55	155	tr|Q8SEZ6|Q8SEZ6_RAT	119.32	14	14	2915300	10	10	12		56879	Cytochrome c oxidase subunit 1 OS=Rattus norvegicus OX=10116 GN=COI PE=3 SV=1
55	156	tr|A0A0A1FZ34|A0A0A1FZ34_RAT	119.32	14	14	2915300	10	10	12		56937	Cytochrome c oxidase subunit 1 OS=Rattus norvegicus OX=10116 GN=COX1 PE=3 SV=1
55	157	tr|Q8HIC9|Q8HIC9_RAT	119.32	14	14	2915300	10	10	12		56845	Cytochrome c oxidase subunit 1 OS=Rattus norvegicus OX=10116 GN=Mt-co1 PE=3 SV=1
55	158	P05503|COX1_RAT	119.32	14	14	2915300	10	10	12		56845	Cytochrome c oxidase subunit 1 OS=Rattus norvegicus OX=10116 GN=Mtco1 PE=2 SV=3
55	159	tr|Q95938|Q95938_RAT	119.32	14	14	2915300	10	10	12		56977	Cytochrome c oxidase subunit 1 OS=Rattus norvegicus OX=10116 GN=Co I PE=3 SV=1
61	192	tr|B5DEL8|B5DEL8_RAT	118.6	39	39	2182200	6	6	11		12700	NADH dehydrogenase (Ubiquinone) Fe-S protein 5 OS=Rattus norvegicus OX=10116 GN=Ndufs5 PE=1 SV=1
61	193	tr|A0A0G2JZJ9|A0A0G2JZJ9_RAT	118.6	39	39	2182200	6	6	11		12730	Uncharacterized protein OS=Rattus norvegicus OX=10116 PE=4 SV=1
67	194	Q9R063|PRDX5_RAT	116.7	26	26	1220500	6	6	8	Oxidation (M)	22179	Peroxiredoxin-5 mitochondrial OS=Rattus norvegicus OX=10116 GN=Prdx5 PE=1 SV=1
67	195	tr|A0A0G2JSS8|A0A0G2JSS8_RAT	116.7	26	26	1220500	6	6	8	Oxidation (M)	22207	Peroxiredoxin OS=Rattus norvegicus OX=10116 GN=Prdx5 PE=1 SV=1
63	216	Q7TQ16|QCR8_RAT	115.27	49	49	3614000	8	8	10		9849	Cytochrome b-c1 complex subunit 8 OS=Rattus norvegicus OX=10116 GN=Uqcrq PE=3 SV=1
57	220	P12075|COX5B_RAT	114.67	32	32	5639800	8	8	11		13915	Cytochrome c oxidase subunit 5B mitochondrial OS=Rattus norvegicus OX=10116 GN=Cox5b PE=1 SV=2
86	261	P24329|THTR_RAT	111.18	14	14	940480	4	4	4		33407	Thiosulfate sulfurtransferase OS=Rattus norvegicus OX=10116 GN=Tst PE=1 SV=3
76	267	tr|I6V4L9|I6V4L9_RAT	105.29	9	9	729190	4	4	5	Oxidation (M)	29844	Cytochrome c oxidase subunit 3 OS=Rattus norvegicus OX=10116 GN=COX3 PE=3 SV=1
80	272	tr|M0RB63|M0RB63_RAT	103.56	31	31	2033100	3	3	5	Oxidation (M)	9372	RCG63041 OS=Rattus norvegicus OX=10116 GN=LOC684509 PE=4 SV=1
80	281	tr|A9UMW2|A9UMW2_RAT	103.56	31	31	2033100	3	3	5	Oxidation (M)	9255	Ndufa3 protein (Fragment) OS=Rattus norvegicus OX=10116 GN=Ndufa3 PE=2 SV=1
80	282	tr|A0A0G2KAA3|A0A0G2KAA3_RAT	103.56	29	29	2033100	3	3	5	Oxidation (M)	10170	NADH:ubiquinone oxidoreductase subunit A3 OS=Rattus norvegicus OX=10116 GN=Ndufa3 PE=1 SV=1
75	243	tr|D3ZS58|D3ZS58_RAT	102.75	34	34	6916200	5	5	6	Oxidation (M)	10845	NADH dehydrogenase [ubiquinone] 1 alpha subcomplex subunit 2 OS=Rattus norvegicus OX=10116 GN=Ndufa2 PE=1 SV=1
60	162	tr|Q5EBA4|Q5EBA4_RAT	101.2	22	22	2917400	9	9	11	Oxidation (M)	33215	Nipsnap1 protein (Fragment) OS=Rattus norvegicus OX=10116 GN=Nipsnap1 PE=2 SV=1
60	163	tr|G3V728|G3V728_RAT	101.2	22	22	2917400	9	9	11	Oxidation (M)	33346	4-nitrophenylphosphatase domain and non-neuronal SNAP25-like protein homolog 1 (C. elegans) isoform CRA_b OS=Rattus norvegicus OX=10116 GN=Nipsnap1 PE=1 SV=1
69	231	tr|Q5M949|Q5M949_RAT	100.36	17	17	1926600	6	6	7		28340	Nipsnap homolog 3A (C. elegans) OS=Rattus norvegicus OX=10116 GN=Nipsnap3b PE=1 SV=1
85	232	tr|M0R6J0|M0R6J0_RAT	99.49	11	11	696830	3	3	4		38374	Mitochondrial ribosomal protein L39 OS=Rattus norvegicus OX=10116 GN=Mrpl39 PE=1 SV=2
81	279	Q5M9I5|QCR6_RAT	98.98	21	21	2029400	4	4	5		10424	Cytochrome b-c1 complex subunit 6 mitochondrial OS=Rattus norvegicus OX=10116 GN=Uqcrh PE=3 SV=1
71	198	P85834|EFTU_RAT	98.26	13	13	823640	5	5	6		49522	Elongation factor Tu mitochondrial OS=Rattus norvegicus OX=10116 GN=Tufm PE=1 SV=1
74	229	P11960|ODBA_RAT	98.1	14	14	857650	5	5	6		50165	2-oxoisovalerate dehydrogenase subunit alpha mitochondrial (Fragment) OS=Rattus norvegicus OX=10116 GN=Bckdha PE=1 SV=1
130	280	P31399|ATP5H_RAT	95.44	15	15	386280	2	2	2		18763	ATP synthase subunit d mitochondrial OS=Rattus norvegicus OX=10116 GN=Atp5pd PE=1 SV=3
65	249	tr|Q06QE9|Q06QE9_RAT	94.01	14	14	1087900	5	5	8		38598	NADH-ubiquinone oxidoreductase chain 2 OS=Rattus norvegicus OX=10116 GN=ND2 PE=3 SV=1
65	250	tr|Q06Q97|Q06Q97_RAT	94.01	14	14	1087900	5	5	8		38485	NADH-ubiquinone oxidoreductase chain 2 OS=Rattus norvegicus OX=10116 GN=ND2 PE=3 SV=1
65	251	tr|A0A0A1G491|A0A0A1G491_RAT	94.01	14	14	1087900	5	5	8		38542	NADH-ubiquinone oxidoreductase chain 2 OS=Rattus norvegicus OX=10116 GN=ND2 PE=3 SV=1
65	252	tr|Q5UAJ8|Q5UAJ8_RAT	94.01	14	14	1087900	5	5	8		38455	NADH-ubiquinone oxidoreductase chain 2 OS=Rattus norvegicus OX=10116 GN=ND2 PE=3 SV=1
65	253	tr|Q8HID0|Q8HID0_RAT	94.01	14	14	1087900	5	5	8		38653	NADH-ubiquinone oxidoreductase chain 2 OS=Rattus norvegicus OX=10116 GN=Mt-nd2 PE=3 SV=1
65	254	P11662|NU2M_RAT	94.01	14	14	1087900	5	5	8		38653	NADH-ubiquinone oxidoreductase chain 2 OS=Rattus norvegicus OX=10116 GN=Mtnd2 PE=3 SV=3
65	255	tr|Q06QH5|Q06QH5_RAT	94.01	14	14	1087900	5	5	8		38626	NADH-ubiquinone oxidoreductase chain 2 OS=Rattus norvegicus OX=10116 GN=ND2 PE=3 SV=1
65	256	tr|Q06QB0|Q06QB0_RAT	94.01	14	14	1087900	5	5	8		38534	NADH-ubiquinone oxidoreductase chain 2 OS=Rattus norvegicus OX=10116 GN=ND2 PE=3 SV=1
65	257	tr|D2E6P4|D2E6P4_RAT	94.01	14	14	1087900	5	5	8		38623	NADH-ubiquinone oxidoreductase chain 2 OS=Rattus norvegicus OX=10116 GN=ND2 PE=3 SV=1
65	258	tr|Q8SEZ7|Q8SEZ7_RAT	94.01	14	14	1087900	5	5	8		38580	NADH-ubiquinone oxidoreductase chain 2 (Fragment) OS=Rattus norvegicus OX=10116 GN=NADH2 PE=3 SV=1
78	263	tr|A0A0G2JSH5|A0A0G2JSH5_RAT	84.93	4	4	1530300	4	4	5	Formylation	68759	Serum albumin OS=Rattus norvegicus OX=10116 GN=Alb PE=1 SV=1
78	264	P02770|ALBU_RAT	84.93	4	4	1530300	4	4	5	Formylation	68731	Serum albumin OS=Rattus norvegicus OX=10116 GN=Alb PE=1 SV=2
87	233	P29147|BDH_RAT	83.22	11	11	654630	4	4	4		38202	D-beta-hydroxybutyrate dehydrogenase mitochondrial OS=Rattus norvegicus OX=10116 GN=Bdh1 PE=1 SV=2
87	234	tr|A0A0G2JSH2|A0A0G2JSH2_RAT	83.22	11	11	654630	4	4	4		38333	3-hydroxybutyrate dehydrogenase type 1 isoform CRA_a OS=Rattus norvegicus OX=10116 GN=Bdh1 PE=1 SV=1
99	291	tr|Q5XFW4|Q5XFW4_RAT	77.86	15	15	440540	3	3	3		20541	Mitochondrial ribosomal protein L13 OS=Rattus norvegicus OX=10116 GN=Mrpl13 PE=1 SV=1
82	347	P80433|COX8A_RAT	77.35	19	19	2079300	3	3	5		7672	Cytochrome c oxidase subunit 8A mitochondrial OS=Rattus norvegicus OX=10116 GN=Cox8a PE=1 SV=3
72	248	tr|B2RYW3|B2RYW3_RAT	76.03	23	23	1659100	5	5	6	Oxidation (M)	21892	NADH dehydrogenase (Ubiquinone) 1 beta subcomplex 9 OS=Rattus norvegicus OX=10116 GN=Ndufb9 PE=1 SV=1
97	268	P19511|AT5F1_RAT	71.92	9	9	1783700	2	2	3		28869	ATP synthase F(0) complex subunit B1 mitochondrial OS=Rattus norvegicus OX=10116 GN=Atp5pb PE=1 SV=1
98	290	tr|Q4G067|Q4G067_RAT	69.7	8	8	545360	3	3	3		37440	Mitochondrial ribosomal protein L44 OS=Rattus norvegicus OX=10116 GN=Mrpl44 PE=1 SV=1
131	283	P80431|COX7B_RAT	68.41	28	28	587520	2	2	2		8995	Cytochrome c oxidase subunit 7B mitochondrial OS=Rattus norvegicus OX=10116 GN=Cox7b PE=1 SV=3
100	284	tr|A0A0G2K8Q8|A0A0G2K8Q8_RAT	67.89	29	29	571820	3	3	3		7099	Ubiquinol-cytochrome c reductase complex III subunit X OS=Rattus norvegicus OX=10116 GN=Uqcr10 PE=1 SV=1
100	285	tr|B2RYX1|B2RYX1_RAT	67.89	28	28	571820	3	3	3		7462	LOC685322 protein OS=Rattus norvegicus OX=10116 GN=Uqcr10 PE=2 SV=1
101	286	tr|A9UMV9|A9UMV9_RAT	66.48	21	21	2811100	3	3	3		12500	NADH:ubiquinone oxidoreductase subunit A7 OS=Rattus norvegicus OX=10116 GN=Ndufa7 PE=1 SV=1
123	271	Q7TT47|SPG7_RAT	65.42	3	3	222660	2	2	2		86103	Paraplegin OS=Rattus norvegicus OX=10116 GN=Spg7 PE=2 SV=2
171	300	tr|A0A0G2K9B4|A0A0G2K9B4_RAT	62.86	6	6	0	1	1	1		33652	Mitochondrial ribosomal protein L15 OS=Rattus norvegicus OX=10116 GN=Mrpl15 PE=1 SV=1
171	328	tr|D4A4B1|D4A4B1_RAT	62.86	9	9	0	1	1	1		23223	Mitochondrial ribosomal protein L15 OS=Rattus norvegicus OX=10116 GN=Mrpl15 PE=1 SV=2
111	266	P04762|CATA_RAT	62.17	4	4	146900	2	2	2		59757	Catalase OS=Rattus norvegicus OX=10116 GN=Cat PE=1 SV=3
77	245	P18163|ACSL1_RAT	58.17	4	4	563690	4	3	5		78179	Long-chain-fatty-acid--CoA ligase 1 OS=Rattus norvegicus OX=10116 GN=Acsl1 PE=1 SV=1
205	322	Q09073|ADT2_RAT	57.34	3	3	168630	1	1	1		32901	ADP/ATP translocase 2 OS=Rattus norvegicus OX=10116 GN=Slc25a5 PE=1 SV=3
96	244	P07824|ARGI1_RAT	56.58	12	12	1022000	3	3	3		34973	Arginase-1 OS=Rattus norvegicus OX=10116 GN=Arg1 PE=1 SV=2
255	343	tr|D3ZX69|D3ZX69_RAT	56.07	5	5	350330	1	1	1		29466	39S ribosomal protein L10 mitochondrial OS=Rattus norvegicus OX=10116 GN=Mrpl10 PE=1 SV=1
255	344	P0C2C4|RM10_RAT	56.07	5	5	350330	1	1	1		29940	39S ribosomal protein L10 mitochondrial OS=Rattus norvegicus OX=10116 GN=Mrpl10 PE=1 SV=1
256	345	tr|D3ZPE6|D3ZPE6_RAT	55.09	8	8	248030	1	1	1		15047	Mitochondrial ribosomal protein L51 OS=Rattus norvegicus OX=10116 GN=Mrpl51 PE=1 SV=1
125	325	P11951|CX6C2_RAT	52.85	11	11	296770	2	2	2		8455	Cytochrome c oxidase subunit 6C-2 OS=Rattus norvegicus OX=10116 GN=Cox6c2 PE=1 SV=3
257	346	Q63750|RM23_RAT	51.43	18	18	240890	1	1	1		17050	39S ribosomal protein L23 mitochondrial OS=Rattus norvegicus OX=10116 GN=Mrpl23 PE=2 SV=1
132	289	tr|D3ZFJ6|D3ZFJ6_RAT	48.84	6	6	326800	2	2	2		60420	Lactamase beta OS=Rattus norvegicus OX=10116 GN=Lactb PE=1 SV=1
258	348	P09139|SPYA_RAT	48.27	3	3	344780	1	1	1		45834	Serine--pyruvate aminotransferase mitochondrial OS=Rattus norvegicus OX=10116 GN=Agxt PE=1 SV=1
133	295	Q8VID1|DHRS4_RAT	47.03	9	9	411400	2	2	2		29822	Dehydrogenase/reductase SDR family member 4 OS=Rattus norvegicus OX=10116 GN=Dhrs4 PE=2 SV=2
12	368	tr|A0A0G2JWK2|A0A0G2JWK2_RAT	45.06	1	1	2837900	1	1	70		53049	Methyl-CpG-binding protein 2 OS=Rattus norvegicus OX=10116 GN=Mecp2 PE=1 SV=1
12	369	Q00566|MECP2_RAT	45.06	1	1	2837900	1	1	70		53048	Methyl-CpG-binding protein 2 OS=Rattus norvegicus OX=10116 GN=Mecp2 PE=1 SV=1
91	273	tr|A0A0G2JVH4|A0A0G2JVH4_RAT	44.45	3	3	2584700	2	2	3		86230	MICOS complex subunit MIC60 OS=Rattus norvegicus OX=10116 GN=Immt PE=1 SV=1
259	350	tr|Q35733|Q35733_RAT	44.41	13	13	0	1	1	1		8389	NADH-ubiquinone oxidoreductase chain 6 (Fragment) OS=Rattus norvegicus OX=10116 PE=3 SV=1
259	351	tr|Q06QD9|Q06QD9_RAT	44.41	6	6	0	1	1	1		18943	NADH-ubiquinone oxidoreductase chain 6 OS=Rattus norvegicus OX=10116 GN=ND6 PE=3 SV=1
259	352	tr|Q7HKW2|Q7HKW2_RAT	44.41	6	6	0	1	1	1		18957	NADH-ubiquinone oxidoreductase chain 6 OS=Rattus norvegicus OX=10116 GN=NADH6 PE=3 SV=1
134	312	P0DN35|NDUB1_RAT	43.81	37	37	498660	2	2	2		6998	NADH dehydrogenase [ubiquinone] 1 beta subcomplex subunit 1 OS=Rattus norvegicus OX=10116 GN=Ndufb1 PE=3 SV=1
260	354	tr|Q3B8N9|Q3B8N9_RAT	42.77	3	3	130870	1	1	1		32823	Biphenyl hydrolase-like OS=Rattus norvegicus OX=10116 GN=Bphl PE=1 SV=1
261	355	P80432|COX7C_RAT	42.07	16	16	194060	1	1	1		7375	Cytochrome c oxidase subunit 7C mitochondrial OS=Rattus norvegicus OX=10116 GN=Cox7c PE=1 SV=2
206	330	tr|F1M953|F1M953_RAT	41.52	2	2	107350	1	1	1		73745	Stress-70 protein mitochondrial OS=Rattus norvegicus OX=10116 GN=Hspa9 PE=1 SV=1
206	331	P48721|GRP75_RAT	41.52	2	2	107350	1	1	1		73858	Stress-70 protein mitochondrial OS=Rattus norvegicus OX=10116 GN=Hspa9 PE=1 SV=3
172	307	Q5XIA8|GHITM_RAT	41.14	3	3	103700	1	1	1		37178	Growth hormone-inducible transmembrane protein OS=Rattus norvegicus OX=10116 GN=Ghitm PE=2 SV=1
262	356	P10818|CX6A1_RAT	40.12	10	10	228910	1	1	1	Oxidation (M)	12301	Cytochrome c oxidase subunit 6A1 mitochondrial OS=Rattus norvegicus OX=10116 GN=Cox6a1 PE=1 SV=2
114	326	P05696|KPCA_RAT	39.15	1	1	555840	1	1	2		76792	Protein kinase C alpha type OS=Rattus norvegicus OX=10116 GN=Prkca PE=1 SV=3
136	357	tr|D3ZLT1|D3ZLT1_RAT	38.66	8	8	482450	1	1	2	Oxidation (M)	16568	NADH dehydrogenase (Ubiquinone) 1 beta subcomplex 7 (Predicted) OS=Rattus norvegicus OX=10116 GN=Ndufb7 PE=1 SV=1
135	324	P33124|ACSL6_RAT	38.24	2	2		2	0	2		78180	Long-chain-fatty-acid--CoA ligase 6 OS=Rattus norvegicus OX=10116 GN=Acsl6 PE=1 SV=1
263	358	tr|A0A0H2UHR5|A0A0H2UHR5_RAT	38.03	3	3	44636	1	1	1		46214	Protein-serine/threonine kinase OS=Rattus norvegicus OX=10116 GN=Bckdk PE=1 SV=1
263	359	Q00972|BCKD_RAT	38.03	3	3	44636	1	1	1		46474	[3-methyl-2-oxobutanoate dehydrogenase [lipoamide]] kinase mitochondrial OS=Rattus norvegicus OX=10116 GN=Bckdk PE=1 SV=2
264	362	tr|G3V9S6|G3V9S6_RAT	36.42	14	14	139720	1	1	1		8148	NADH dehydrogenase [ubiquinone] 1 alpha subcomplex subunit 1 OS=Rattus norvegicus OX=10116 GN=Ndufa1 PE=1 SV=2
102	406	tr|D3ZD23|D3ZD23_RAT	35.06	1	1	817600	2	2	3		67300	ATP-binding cassette subfamily E member 1 OS=Rattus norvegicus OX=10116 GN=Abce1 PE=1 SV=1
115	329	Q06437|ODPAT_RAT	34.37	7	7	2018600	2	2	2	Carbamidomethylation		Pyruvate dehydrogenase E1 component subunit alpha, testis-specific form, mitochondrial
117	293	Q9WVK3|PECR_RAT	34.35	7	7	530840	2	2	2	Oxidation (M)	32433	Peroxisomal trans-2-enoyl-CoA reductase OS=Rattus norvegicus OX=10116 GN=Pecr PE=2 SV=1
117	294	tr|A0A0G2JVG4|A0A0G2JVG4_RAT	34.35	7	7	530840	2	2	2	Oxidation (M)	32737	Peroxisomal trans-2-enoyl-CoA reductase OS=Rattus norvegicus OX=10116 GN=Pecr PE=1 SV=1
207	332	Q9ER34|ACON_RAT	34.16	1	1	171590	1	1	1		85433	Aconitate hydratase mitochondrial OS=Rattus norvegicus OX=10116 GN=Aco2 PE=1 SV=2
106	380	O70351|HCD2_RAT	33.38	8	8	30581	2	2	2		27246	3-hydroxyacyl-CoA dehydrogenase type-2 OS=Rattus norvegicus OX=10116 GN=Hsd17b10 PE=1 SV=3
106	381	tr|B0BMW2|B0BMW2_RAT	33.38	8	8	30581	2	2	2		27250	3-hydroxyacyl-CoA dehydrogenase type-2 OS=Rattus norvegicus OX=10116 GN=Hsd17b10 PE=1 SV=1
208	335	P28494|MA2A1_RAT	32.84	1	1	69802	1	1	1		131242	Alpha-mannosidase 2 OS=Rattus norvegicus OX=10116 GN=Man2a1 PE=1 SV=2
89	317	tr|A0A0G2JYD4|A0A0G2JYD4_RAT	31.49	1	1	651930	3	3	3	Formylation	487857	Vacuolar protein sorting 13 homolog D OS=Rattus norvegicus OX=10116 GN=Vps13d PE=1 SV=1
89	318	tr|D3ZKC6|D3ZKC6_RAT	31.49	1	1	651930	3	3	3	Formylation	488962	Vacuolar protein sorting 13 homolog D OS=Rattus norvegicus OX=10116 GN=Vps13d PE=1 SV=1
187	309	P63039|CH60_RAT	30.71	2	2	145330	1	1	1		60956	60 kDa heat shock protein mitochondrial OS=Rattus norvegicus OX=10116 GN=Hspd1 PE=1 SV=1
187	310	tr|A0A482IDN3|A0A482IDN3_RAT	30.71	2	2	145330	1	1	1		60956	Hsp60 OS=Rattus norvegicus OX=10116 GN=Hspd1 PE=2 SV=1
266	373	Q4KLP0|DHTK1_RAT	30.6	1	1	0	1	1	1		102642	Probable 2-oxoglutarate dehydrogenase E1 component DHKTD1 mitochondrial OS=Rattus norvegicus OX=10116 GN=Dhtkd1 PE=2 SV=1
170	297	tr|Q6QI09|Q6QI09_RAT	30.39	2	2	0	1	1	1		67721	ATP synthase subunit gamma mitochondrial OS=Rattus norvegicus OX=10116 GN=Taf3 PE=1 SV=1
170	301	P35435|ATPG_RAT	30.39	4	4	0	1	1	1		30191	ATP synthase subunit gamma mitochondrial OS=Rattus norvegicus OX=10116 GN=Atp5f1c PE=1 SV=2
209	338	tr|A0A0G2JYU2|A0A0G2JYU2_RAT	30.08	4	4	1354800	1	1	1		20750	Mitochondrial ribosomal protein L11 OS=Rattus norvegicus OX=10116 GN=mrpl11 PE=1 SV=1
209	339	Q5XIE3|RM11_RAT	30.08	4	4	1354800	1	1	1		22420	39S ribosomal protein L11 mitochondrial OS=Rattus norvegicus OX=10116 GN=Mrpl11 PE=2 SV=1
137	374	P48037|ANXA6_RAT	29.99	1	1	441900	1	1	2		75754	Annexin A6 OS=Rattus norvegicus OX=10116 GN=Anxa6 PE=1 SV=2
137	375	tr|Q6IMZ3|Q6IMZ3_RAT	29.99	1	1	441900	1	1	2		75756	Annexin OS=Rattus norvegicus OX=10116 GN=Anxa6 PE=1 SV=1
94	341	Q63563|ABCC9_RAT	28.83	1	1	1451100	2	2	3		174117	ATP-binding cassette sub-family C member 9 OS=Rattus norvegicus OX=10116 GN=Abcc9 PE=1 SV=1
267	377	A0A0G2JZ79|SIR1_RAT	28.73	2	2	308790	1	1	1		62059	NAD-dependent protein deacetylase sirtuin-1 OS=Rattus norvegicus OX=10116 GN=Sirt1 PE=3 SV=2
267	378	tr|A0A182DWI7|A0A182DWI7_RAT	28.73	1	1	308790	1	1	1		81778	NAD-dependent protein deacetylase sirtuin-1 OS=Rattus norvegicus OX=10116 GN=Sirt1 PE=4 SV=1
268	382	Q01062|PDE2A_RAT	28.44	2	2	8010800	1	1	1		104664	cGMP-dependent 3' 5'-cyclic phosphodiesterase OS=Rattus norvegicus OX=10116 GN=Pde2a PE=1 SV=2
268	383	tr|F8WFW5|F8WFW5_RAT	28.44	1	1	8010800	1	1	1		105234	Phosphodiesterase OS=Rattus norvegicus OX=10116 GN=Pde2a PE=1 SV=1
269	385	tr|B1WBP7|B1WBP7_RAT	27.42	7	7	95662	1	1	1		12884	ATP synthase subunit delta mitochondrial OS=Rattus norvegicus OX=10116 GN=Atp5f1d PE=1 SV=1
269	386	P35434|ATPD_RAT	27.42	5	5	95662	1	1	1		17595	ATP synthase subunit delta mitochondrial OS=Rattus norvegicus OX=10116 GN=Atp5f1d PE=1 SV=2
269	387	tr|G3V7Y3|G3V7Y3_RAT	27.42	5	5	95662	1	1	1		17563	ATP synthase subunit delta mitochondrial OS=Rattus norvegicus OX=10116 GN=Atp5f1d PE=1 SV=1
270	388	P83565|RM40_RAT	27	8	8	210140	1	1	1		24397	39S ribosomal protein L40 mitochondrial OS=Rattus norvegicus OX=10116 GN=Mrpl40 PE=1 SV=2
107	441	P11530|DMD_RAT	26.92	0	0	2142800	2	2	2		425830	Dystrophin OS=Rattus norvegicus OX=10116 GN=Dmd PE=1 SV=2
156	314	tr|D3ZHK4|D3ZHK4_RAT	25.68	0	0	0	1	1	1		182226	RB1-inducible coiled-coil 1 OS=Rattus norvegicus OX=10116 GN=Rb1cc1 PE=1 SV=1
271	396	tr|D3ZH23|D3ZH23_RAT	25.53	13	13	18559	1	1	1	Oxidation (M)	15195	Similar to mitochondrial ribosomal protein L41 OS=Rattus norvegicus OX=10116 GN=RGD1560917 PE=4 SV=1
271	397	Q5BJX1|RM41_RAT	25.53	13	13	18559	1	1	1	Oxidation (M)	15193	39S ribosomal protein L41 mitochondrial OS=Rattus norvegicus OX=10116 GN=Mrpl41 PE=1 SV=1
211	376	tr|D3ZDP2|D3ZDP2_RAT	25.29	4	4	130930	1	1	1		23470	Mitochondrial ribosomal protein L58 OS=Rattus norvegicus OX=10116 GN=Mrpl58 PE=1 SV=1
273	416	tr|Q5UAJ5|Q5UAJ5_RAT	24.18	13	13	267640	1	1	1		7642	ATP synthase protein 8 OS=Rattus norvegicus OX=10116 GN=ATP8 PE=3 SV=1
273	417	P11608|ATP8_RAT	24.18	13	13	267640	1	1	1		7630	ATP synthase protein 8 OS=Rattus norvegicus OX=10116 GN=Mt-atp8 PE=1 SV=2
273	418	tr|Q8SEZ4|Q8SEZ4_RAT	24.18	13	13	267640	1	1	1		7632	ATP synthase protein 8 OS=Rattus norvegicus OX=10116 GN=ATPase8 PE=3 SV=1
273	419	tr|Q8HIC8|Q8HIC8_RAT	24.18	13	13	267640	1	1	1		7630	ATP synthase protein 8 OS=Rattus norvegicus OX=10116 GN=Mt-atp8 PE=3 SV=1
274	420	tr|F1LUC0|F1LUC0_RAT	24.08	2	2	79994	1	1	1	Formylation	72937	Similar to RIKEN cDNA 5730410E15 gene (Predicted) isoform CRA_a OS=Rattus norvegicus OX=10116 GN=Sybu PE=1 SV=2
277	431	Q32PX9|AFG1L_RAT	23.34	2	2	789440	1	1	1	Formylation	54503	AFG1-like ATPase OS=Rattus norvegicus OX=10116 GN=Afg1l PE=2 SV=1
173	320	tr|D3ZYB6|D3ZYB6_RAT	23.23	1	1	149470	1	1	1		135817	DNA-directed RNA polymerase OS=Rattus norvegicus OX=10116 GN=Polrmt PE=3 SV=2
278	432	P61980|HNRPK_RAT	22.99	2	2	48816	1	1	1		50976	Heterogeneous nuclear ribonucleoprotein K OS=Rattus norvegicus OX=10116 GN=Hnrnpk PE=1 SV=1
212	392	Q6AYC2|IRGM_RAT	22.73	2	2	0	1	1	1		46338	Immunity-related GTPase family M protein OS=Rattus norvegicus OX=10116 GN=Irgm PE=2 SV=1
213	400	tr|D4A7Q5|D4A7Q5_RAT	22.58	1	1	890830	1	1	1		59940	DEAD (Asp-Glu-Ala-Asp) box polypeptide 28 (Predicted) OS=Rattus norvegicus OX=10116 GN=Ddx28 PE=4 SV=1
216	407	tr|D3ZXQ6|D3ZXQ6_RAT	22.58	3	3	761030	1	1	1		46897	LETM1 domain-containing protein LETM2 mitochondrial OS=Rattus norvegicus OX=10116 GN=Letm2 PE=4 SV=3
216	408	Q5PQQ5|LETM2_RAT	22.58	3	3	761030	1	1	1		52524	LETM1 domain-containing protein LETM2 mitochondrial OS=Rattus norvegicus OX=10116 GN=Letm2 PE=2 SV=1
216	409	tr|F1LP77|F1LP77_RAT	22.58	3	3	761030	1	1	1		52501	LETM1 domain-containing protein LETM2 mitochondrial OS=Rattus norvegicus OX=10116 GN=Letm2 PE=4 SV=3
116	403	Q01728|NAC1_RAT	22.12	1	1	4155100	1	1	2	Formylation	108184	Sodium/calcium exchanger 1 OS=Rattus norvegicus OX=10116 GN=Slc8a1 PE=1 SV=3
116	404	P70549|NAC3_RAT	22.12	1	1	4155100	1	1	2	Formylation	103163	Sodium/calcium exchanger 3 OS=Rattus norvegicus OX=10116 GN=Slc8a3 PE=1 SV=1
148	536	P15205|MAP1B_RAT	22.12	0	0		1	0	1		269640	Microtubule-associated protein 1B OS=Rattus norvegicus OX=10116 GN=Map1b PE=1 SV=3
215	405	tr|D3ZVS2|D3ZVS2_RAT	22.08	2	2	405220	1	1	1		50733	L-2-hydroxyglutarate dehydrogenase OS=Rattus norvegicus OX=10116 GN=L2hgdh PE=1 SV=1
279	435	tr|A0A0G2K4M8|A0A0G2K4M8_RAT	22.01	2	2	164510	1	1	1	Formylation	47158	Acyl-CoA thioesterase 3 OS=Rattus norvegicus OX=10116 GN=Acot3 PE=1 SV=1
181	456	tr|A0A0G2K5L6|A0A0G2K5L6_RAT	21.77	0	0	103530	1	1	1		275755	Acetyl-CoA carboxylase beta OS=Rattus norvegicus OX=10116 GN=Acacb PE=1 SV=1
181	457	tr|A0A0G2K1F2|A0A0G2K1F2_RAT	21.77	0	0	103530	1	1	1		276393	Acetyl-CoA carboxylase beta OS=Rattus norvegicus OX=10116 GN=Acacb PE=1 SV=1
181	458	tr|O70151|O70151_RAT	21.77	0	0	103530	1	1	1		276097	Acetyl-CoA carboxylase OS=Rattus norvegicus OX=10116 GN=Acacb PE=2 SV=1
181	459	tr|D3ZBE2|D3ZBE2_RAT	21.77	0	0	103530	1	1	1		275967	Acetyl-CoA carboxylase beta OS=Rattus norvegicus OX=10116 GN=Acacb PE=1 SV=3
181	460	tr|E9PSQ0|E9PSQ0_RAT	21.77	0	0	103530	1	1	1		276255	Acetyl-CoA carboxylase beta OS=Rattus norvegicus OX=10116 GN=Acacb PE=1 SV=2
181	545	P11497|ACACA_RAT	21.77	0	0	103530	1	1	1		265191	Acetyl-CoA carboxylase 1 OS=Rattus norvegicus OX=10116 GN=Acaca PE=1 SV=1
145	498	Q99NA5|IDH3A_RAT	20.6	4	4	0	1	1	1		39614	Isocitrate dehydrogenase [NAD] subunit alpha mitochondrial OS=Rattus norvegicus OX=10116 GN=Idh3a PE=1 SV=1
145	499	tr|F1LNF7|F1LNF7_RAT	20.6	4	4	0	1	1	1		41177	Isocitrate dehydrogenase [NAD] subunit mitochondrial OS=Rattus norvegicus OX=10116 GN=Idh3a PE=1 SV=2
198	502	Q5BJT0|ARGL1_RAT	20.49	4	4	1221100	1	1	1	Formylation	32887	Arginine and glutamate-rich protein 1 OS=Rattus norvegicus OX=10116 GN=Arglu1 PE=1 SV=1
218	465	P07633|PCCB_RAT	20.48	2	2	0	1	1	1	Formylation	58626	Propionyl-CoA carboxylase beta chain mitochondrial OS=Rattus norvegicus OX=10116 GN=Pccb PE=2 SV=1
218	466	tr|Q68FZ8|Q68FZ8_RAT	20.48	2	2	0	1	1	1	Formylation	58678	Propionyl coenzyme A carboxylase beta polypeptide OS=Rattus norvegicus OX=10116 GN=Pccb PE=1 SV=1
190	424	P21575|DYN1_RAT	20.08	1	1	174940	1	1	1	Formylation	97295	Dynamin-1 OS=Rattus norvegicus OX=10116 GN=Dnm1 PE=1 SV=2

## Sheet: RLM SM-BM Cont I-III(2)-IV(L)
Protein Group	Protein ID	Accession	-10lgP	Coverage (%)	Coverage (%) Sample 2	IBAQ	#Peptides	#Unique	#Spec Sample 2	PTM	Avg. Mass	Description
1	1	Q02253|MMSA_RAT	368.86	56	56	94026000	98	98	166	Carbamidomethylation		Methylmalonate-semialdehyde dehydrogenase [acylating], mitochondrial
1	2	tr|G3V7J0|G3V7J0_RAT	368.86	56	56	94026000	98	98	166	Carbamidomethylation		Aldehyde dehydrogenase family 6, subfamily A1, isoform CRA_b
4	17	P10719|ATPB_RAT	343.59	52	52	75575000	70	70	103	Oxidation (M)	56354	ATP synthase subunit beta mitochondrial OS=Rattus norvegicus OX=10116 GN=Atp5f1b PE=1 SV=2
4	18	tr|G3V6D3|G3V6D3_RAT	343.59	52	52	75575000	70	70	103	Oxidation (M)	56345	ATP synthase subunit beta OS=Rattus norvegicus OX=10116 GN=Atp5f1b PE=1 SV=1
7	9	Q5BK63|NDUA9_RAT	336.82	50	50	39873000	60	58	99	Oxidation (M)		NADH dehydrogenase [ubiquinone] 1 alpha subcomplex subunit 9, mitochondrial
3	10	Q66HF1|NDUS1_RAT	310.93	40	40	86104000	88	87	139	Oxidation (M)	79412	NADH-ubiquinone oxidoreductase 75 kDa subunit mitochondrial OS=Rattus norvegicus OX=10116 GN=Ndufs1 PE=1 SV=1
2	13	P32551|QCR2_RAT	308.41	43	43	96021000	60	60	157	Oxidation (M)	48396	Cytochrome b-c1 complex subunit 2 mitochondrial OS=Rattus norvegicus OX=10116 GN=Uqcrc2 PE=1 SV=2
6	30	P19234|NDUV2_RAT	293.78	48	48	83337000	51	51	101	Formylation	27378	NADH dehydrogenase [ubiquinone] flavoprotein 2 mitochondrial OS=Rattus norvegicus OX=10116 GN=Ndufv2 PE=1 SV=2
5	20	P15999|ATPA_RAT	291.03	46	46	62833000	63	62	101	Oxidation (M)	59754	ATP synthase subunit alpha mitochondrial OS=Rattus norvegicus OX=10116 GN=Atp5f1a PE=1 SV=2
5	21	tr|F1LP05|F1LP05_RAT	291.03	46	46	62833000	63	62	101	Oxidation (M)	59813	ATP synthase subunit alpha OS=Rattus norvegicus OX=10116 GN=Atp5f1a PE=1 SV=1
13	22	tr|D3ZFQ8|D3ZFQ8_RAT	290.52	44	44	61435000	34	33	61	Oxidation (M)	35435	Cytochrome c-1 OS=Rattus norvegicus OX=10116 GN=Cyc1 PE=1 SV=3
20	45	tr|B2RYS8|B2RYS8_RAT	285.81	41	41	22872000	26	26	40	Oxidation (M)	21959	NADH dehydrogenase [ubiquinone] 1 beta subcomplex subunit 8 mitochondrial OS=Rattus norvegicus OX=10116 GN=Ndufb8 PE=1 SV=1
12	8	P07756|CPSM_RAT	283.66	25	25	31773000	56	56	73	Oxidation (M)	164579	Carbamoyl-phosphate synthase [ammonia] mitochondrial OS=Rattus norvegicus OX=10116 GN=Cps1 PE=1 SV=1
8	12	Q68FY0|QCR1_RAT	283.38	44	44	97610000	60	59	97	Carbamidomethylation		Cytochrome b-c1 complex subunit 1, mitochondrial
10	26	Q641Y2|NDUS2_RAT	280.71	53	53	51112000	52	51	93	Oxidation (M)	52562	NADH dehydrogenase [ubiquinone] iron-sulfur protein 2 mitochondrial OS=Rattus norvegicus OX=10116 GN=Ndufs2 PE=1 SV=1
16	164	tr|D3ZF13|D3ZF13_RAT	254.65	36	36	28833000	28	28	48	Oxidation (M)	17514	Acyl carrier protein OS=Rattus norvegicus OX=10116 GN=Ndufab1 PE=1 SV=1
19	80	P20788|UCRI_RAT	254.3	42	42	29827000	25	24	41	Oxidation (M)	29446	Cytochrome b-c1 complex subunit Rieske mitochondrial OS=Rattus norvegicus OX=10116 GN=Uqcrfs1 PE=1 SV=2
14	11	P67779|PHB_RAT	254.11	60	60	27222000	39	39	56		29820	Prohibitin OS=Rattus norvegicus OX=10116 GN=Phb PE=1 SV=1
11	24	tr|D3ZG43|D3ZG43_RAT	245.56	52	52	44837000	44	43	77		30226	NADH dehydrogenase (Ubiquinone) Fe-S protein 3 (Predicted) isoform CRA_c OS=Rattus norvegicus OX=10116 GN=Ndufs3 PE=1 SV=1
36	111	Q5XIF3|NDUS4_RAT	240.38	21	21	11462000	16	16	20		19741	NADH dehydrogenase [ubiquinone] iron-sulfur protein 4 mitochondrial OS=Rattus norvegicus OX=10116 GN=Ndufs4 PE=1 SV=1
17	28	Q561S0|NDUAA_RAT	238.77	38	38	24537000	27	27	46	Oxidation (M)	40493	NADH dehydrogenase [ubiquinone] 1 alpha subcomplex subunit 10 mitochondrial OS=Rattus norvegicus OX=10116 GN=Ndufa10 PE=1 SV=1
18	46	tr|L0L4L8|L0L4L8_RAT	236.92	29	29	6462700	27	3	44	Oxidation (M)
18	47	tr|A0A140GE10|A0A140GE10_RAT	236.92	29	29	6462700	27	3	44	Oxidation (M)
18	48	tr|A0A140GE11|A0A140GE11_RAT	236.92	29	29	6462700	27	3	44	Oxidation (M)
18	49	tr|A0A3Q8AGE8|A0A3Q8AGE8_RAT	236.92	29	29	6462700	27	3	44	Oxidation (M)
18	50	tr|A0A3Q8AC68|A0A3Q8AC68_RAT	236.92	29	29	6462700	27	3	44	Oxidation (M)
18	51	tr|A0A3S6FM15|A0A3S6FM15_RAT	236.92	29	29	6462700	27	3	44	Oxidation (M)
18	52	tr|A0A220D9Z6|A0A220D9Z6_RAT	236.92	28	28	6462700	27	3	44	Oxidation (M)
18	99	tr|D6NSP2|D6NSP2_RAT	236.92	28	28	6462700	27	3	44	Oxidation (M)
18	53	tr|D6NSS6|D6NSS6_RAT	236.92	28	28	6462700	27	3	44	Oxidation (M)
18	54	tr|D6NSR3|D6NSR3_RAT	236.92	28	28	6462700	27	3	44	Oxidation (M)
18	55	tr|D6NSR8|D6NSR8_RAT	236.92	28	28	6462700	27	3	44	Oxidation (M)
18	56	tr|A0A0A1FZ42|A0A0A1FZ42_RAT	236.92	28	28	6462700	27	3	44	Oxidation (M)
18	57	tr|D6NSS7|D6NSS7_RAT	236.92	28	28	6462700	27	3	44	Oxidation (M)
18	58	tr|Q8SEY9|Q8SEY9_RAT	236.92	28	28	6462700	27	3	44	Oxidation (M)
18	44	tr|D6NSR7|D6NSR7_RAT	236.92	28	28	6462700	27	3	44	Oxidation (M)
18	59	tr|A0A220DA44|A0A220DA44_RAT	236.92	28	28	6462700	27	3	44	Oxidation (M)
18	60	tr|D6NSQ0|D6NSQ0_RAT	236.92	28	28	6462700	27	3	44	Oxidation (M)
18	61	tr|Q5UAI7|Q5UAI7_RAT	236.92	28	28	6462700	27	3	44	Oxidation (M)		Cytochrome b
18	62	tr|Q8HIC4|Q8HIC4_RAT	236.92	28	28	6462700	27	3	44	Oxidation (M)		Cytochrome b
18	63	tr|A0A220DA02|A0A220DA02_RAT	236.92	28	28	6462700	27	3	44	Oxidation (M)
18	64	tr|A0A0S1Z1V4|A0A0S1Z1V4_RAT	236.92	28	28	6462700	27	3	44	Oxidation (M)
18	65	P00159|CYB_RAT	236.92	28	28	6462700	27	3	44	Oxidation (M)		Cytochrome b
18	66	tr|L0N311|L0N311_RAT	236.92	28	28	6462700	27	3	44	Oxidation (M)
18	67	tr|A0A220DA28|A0A220DA28_RAT	236.92	28	28	6462700	27	3	44	Oxidation (M)
18	68	tr|H2KXA0|H2KXA0_RAT	236.92	28	28	6462700	27	3	44	Oxidation (M)
27	165	tr|D4A565|D4A565_RAT	236.7	43	43	18426000	21	21	31		21664	NADH dehydrogenase (Ubiquinone) 1 beta subcomplex 5 (Predicted) isoform CRA_b OS=Rattus norvegicus OX=10116 GN=Ndufb5 PE=1 SV=1
31	135	tr|B0BNE6|B0BNE6_RAT	236.02	26	26	13589000	20	18	27		23970	NADH dehydrogenase (Ubiquinone) Fe-S protein 8 (Predicted) isoform CRA_a OS=Rattus norvegicus OX=10116 GN=Ndufs8 PE=1 SV=1
21	19	Q5XIH7|PHB2_RAT	234.49	46	46	16253000	27	27	38	Oxidation (M)	33312	Prohibitin-2 OS=Rattus norvegicus OX=10116 GN=Phb2 PE=1 SV=1
29	14	P10860|DHE3_RAT	233.57	27	27	8900400	26	26	29	Oxidation (M)		Glutamate dehydrogenase 1, mitochondrial
24	35	P52873|PYC_RAT	229.8	15	15	9053300	27	27	34	Oxidation (M)	129777	Pyruvate carboxylase mitochondrial OS=Rattus norvegicus OX=10116 GN=Pc PE=1 SV=2
24	34	tr|A0A0G2JTL5|A0A0G2JTL5_RAT	229.8	14	14	9053300	27	27	34	Oxidation (M)	140005	Pyruvate carboxylase mitochondrial OS=Rattus norvegicus OX=10116 GN=Pc PE=1 SV=1
23	42	tr|D4A0T0|D4A0T0_RAT	229.5	45	45	24087000	20	20	36		20859	NADH:ubiquinone oxidoreductase subunit B10 OS=Rattus norvegicus OX=10116 GN=Ndufb10 PE=1 SV=1
32	242	Q80W89|NDUAB_RAT	226.94	28	28	12284000	16	16	26		14854	NADH dehydrogenase [ubiquinone] 1 alpha subcomplex subunit 11 OS=Rattus norvegicus OX=10116 GN=Ndufa11 PE=2 SV=1
25	15	P00507|AATM_RAT	226.22	30	30	14459000	23	23	33	Oxidation (M)	47314	Aspartate aminotransferase mitochondrial OS=Rattus norvegicus OX=10116 GN=Got2 PE=1 SV=2
39	29	P07895|SODM_RAT	217.75	36	36	12661000	11	11	19		24674	Superoxide dismutase [Mn] mitochondrial OS=Rattus norvegicus OX=10116 GN=Sod2 PE=1 SV=2
34	246	tr|Q5PQZ9|Q5PQZ9_RAT	215.8	37	37	29073000	13	13	25		14359	NADH dehydrogenase [ubiquinone] 1 subunit C2 OS=Rattus norvegicus OX=10116 GN=Ndufc2 PE=1 SV=1
35	183	tr|D4A7L4|D4A7L4_RAT	208.45	42	42	24621000	14	14	23		17634	NADH dehydrogenase (Ubiquinone) 1 beta subcomplex 11 (Predicted) OS=Rattus norvegicus OX=10116 GN=Ndufb11 PE=1 SV=1
15	23	tr|Q5XIH3|Q5XIH3_RAT	206.98	27	27	42903000	25	25	49	Oxidation (M)	50731	NADH dehydrogenase [ubiquinone] flavoprotein 1 mitochondrial OS=Rattus norvegicus OX=10116 GN=Ndufv1 PE=1 SV=1
22	74	tr|Q9G898|Q9G898_RAT	202.43	28	28	0	25	1	38	Oxidation (M)		Cytochrome b
38	168	tr|F1LXA0|F1LXA0_RAT	201.7	37	37	17697000	14	14	19	Oxidation (M)	17178	NADH dehydrogenase [ubiquinone] 1 alpha subcomplex subunit 12 OS=Rattus norvegicus OX=10116 GN=Ndufa12 PE=1 SV=2
37	112	tr|D4A3V2|D4A3V2_RAT	191.54	42	42	5754500	17	17	19	Oxidation (M)	15224	NADH dehydrogenase [ubiquinone] 1 alpha subcomplex subunit 6 OS=Rattus norvegicus OX=10116 GN=Ndufa6 PE=1 SV=1
28	3	tr|B2GV15|B2GV15_RAT	189.62	25	25	15523000	19	19	30	Oxidation (M)	53274	Dihydrolipoamide acetyltransferase component of pyruvate dehydrogenase complex OS=Rattus norvegicus OX=10116 GN=Dbt PE=1 SV=1
30	110	tr|A0A0G2JVL6|A0A0G2JVL6_RAT	187.14	37	37	15203000	15	15	28		19965	NADH dehydrogenase [ubiquinone] 1 alpha subcomplex subunit 8 OS=Rattus norvegicus OX=10116 GN=Ndufa8 PE=1 SV=1
33	36	tr|Q06QK5|Q06QK5_RAT	180.32	17	17	12038000	17	17	25	Oxidation (M)	68606	NADH-ubiquinone oxidoreductase chain 5 OS=Rattus norvegicus OX=10116 GN=ND5 PE=3 SV=1
33	37	P11661|NU5M_RAT	180.32	17	17	12038000	17	17	25	Oxidation (M)	68618	NADH-ubiquinone oxidoreductase chain 5 OS=Rattus norvegicus OX=10116 GN=Mtnd5 PE=3 SV=3
33	43	tr|Q06QG6|Q06QG6_RAT	180.32	17	17	12038000	17	17	25	Oxidation (M)	68588	NADH-ubiquinone oxidoreductase chain 5 OS=Rattus norvegicus OX=10116 GN=ND5 PE=3 SV=1
33	38	tr|Q06QA1|Q06QA1_RAT	180.32	17	17	12038000	17	17	25	Oxidation (M)	68574	NADH-ubiquinone oxidoreductase chain 5 OS=Rattus norvegicus OX=10116 GN=ND5 PE=3 SV=1
33	39	tr|Q8SEZ0|Q8SEZ0_RAT	180.32	17	17	12038000	17	17	25	Oxidation (M)	68618	NADH-ubiquinone oxidoreductase chain 5 OS=Rattus norvegicus OX=10116 GN=Mt-nd5 PE=3 SV=1
33	40	tr|A0A096XKT9|A0A096XKT9_RAT	180.32	17	17	12038000	17	17	25	Oxidation (M)	68584	NADH-ubiquinone oxidoreductase chain 5 OS=Rattus norvegicus OX=10116 GN=ND5 PE=3 SV=1
53	280	P31399|ATP5H_RAT	178.38	32	32	4705600	8	8	11		18763	ATP synthase subunit d mitochondrial OS=Rattus norvegicus OX=10116 GN=Atp5pd PE=1 SV=3
44	301	P35435|ATPG_RAT	175.9	24	24	5025000	12	12	14		30191	ATP synthase subunit gamma mitochondrial OS=Rattus norvegicus OX=10116 GN=Atp5f1c PE=1 SV=2
44	297	tr|Q6QI09|Q6QI09_RAT	175.9	11	11	5025000	12	12	14		67721	ATP synthase subunit gamma mitochondrial OS=Rattus norvegicus OX=10116 GN=Taf3 PE=1 SV=1
40	175	tr|D3ZCZ9|D3ZCZ9_RAT	171.89	48	48	7118900	11	11	18		13040	NADH dehydrogenase [ubiquinone] iron-sulfur protein 6 mitochondrial OS=Rattus norvegicus OX=10116 GN=LOC100912599 PE=1 SV=1
55	281	tr|A9UMW2|A9UMW2_RAT	168.75	45	45	5573800	8	8	11	Oxidation (M)	9255	Ndufa3 protein (Fragment) OS=Rattus norvegicus OX=10116 GN=Ndufa3 PE=2 SV=1
55	272	tr|M0RB63|M0RB63_RAT	168.75	44	44	5573800	8	8	11	Oxidation (M)	9372	RCG63041 OS=Rattus norvegicus OX=10116 GN=LOC684509 PE=4 SV=1
55	282	tr|A0A0G2KAA3|A0A0G2KAA3_RAT	168.75	41	41	5573800	8	8	11	Oxidation (M)	10170	NADH:ubiquinone oxidoreductase subunit A3 OS=Rattus norvegicus OX=10116 GN=Ndufa3 PE=1 SV=1
41	119	tr|D3ZE15|D3ZE15_RAT	166.26	49	49	4673300	14	14	17	Oxidation (M)	16777	NADH:ubiquinone oxidoreductase subunit A13 OS=Rattus norvegicus OX=10116 GN=Ndufa13 PE=1 SV=1
48	133	tr|F1LPG5|F1LPG5_RAT	164.49	35	35	7626800	8	8	13		15064	NADH:ubiquinone oxidoreductase subunit B4 OS=Rattus norvegicus OX=10116 GN=Ndufb4 PE=1 SV=1
45	196	Q63362|NDUA5_RAT	158.49	42	42	6458500	11	10	14		13412	NADH dehydrogenase [ubiquinone] 1 alpha subcomplex subunit 5 OS=Rattus norvegicus OX=10116 GN=Ndufa5 PE=1 SV=3
26	138	P05508|NU4M_RAT	158.36	17	17	7302300	17	16	32	Oxidation (M)		NADH-ubiquinone oxidoreductase chain 4
26	139	tr|D2E6K0|D2E6K0_RAT	158.36	17	17	7302300	17	16	32	Oxidation (M)
26	151	tr|A7XYB9|A7XYB9_RAT	158.36	17	17	7302300	17	16	32	Oxidation (M)
26	140	tr|Q06QE1|Q06QE1_RAT	158.36	17	17	7302300	17	16	32	Oxidation (M)
26	141	tr|Q06QA2|Q06QA2_RAT	158.36	17	17	7302300	17	16	32	Oxidation (M)
26	142	tr|Q7HKW3|Q7HKW3_RAT	158.36	17	17	7302300	17	16	32	Oxidation (M)
26	152	tr|Q06QG7|Q06QG7_RAT	158.36	17	17	7302300	17	16	32	Oxidation (M)
26	143	tr|Q06Q89|Q06Q89_RAT	158.36	17	17	7302300	17	16	32	Oxidation (M)
26	144	tr|Q35737|Q35737_RAT	158.36	17	17	7302300	17	16	32	Oxidation (M)
26	145	tr|Q8HIC6|Q8HIC6_RAT	158.36	17	17	7302300	17	16	32	Oxidation (M)
43	178	tr|D3ZZ21|D3ZZ21_RAT	155.36	49	49	8277000	10	10	15	Oxidation (M)	15638	NADH dehydrogenase (Ubiquinone) 1 beta subcomplex 6 (Predicted) OS=Rattus norvegicus OX=10116 GN=Ndufb6 PE=1 SV=1
60	33	Q64428|ECHA_RAT	143.98	10	10	2174000	8	8	8		82665	Trifunctional enzyme subunit alpha mitochondrial OS=Rattus norvegicus OX=10116 GN=Hadha PE=1 SV=2
69	289	tr|D3ZFJ6|D3ZFJ6_RAT	139.35	9	9	1668700	5	5	5		60420	Lactamase beta OS=Rattus norvegicus OX=10116 GN=Lactb PE=1 SV=1
59	76	tr|Q68G44|Q68G44_RAT	138.29	13	13	2752300	8	8	8		56886	3-hydroxy-3-methylglutaryl coenzyme A synthase OS=Rattus norvegicus OX=10116 GN=Hmgcs2 PE=1 SV=1
46	268	P19511|AT5F1_RAT	135.45	24	24	8802100	10	10	13	Carbamidomethylation		ATP synthase F(0) complex subunit B1, mitochondrial
51	192	tr|B5DEL8|B5DEL8_RAT	132.98	39	39	3647900	8	8	11		12700	NADH dehydrogenase (Ubiquinone) Fe-S protein 5 OS=Rattus norvegicus OX=10116 GN=Ndufs5 PE=1 SV=1
51	193	tr|A0A0G2JZJ9|A0A0G2JZJ9_RAT	132.98	39	39	3647900	8	8	11		12730	Uncharacterized protein OS=Rattus norvegicus OX=10116 PE=4 SV=1
57	176	P13086|SUCA_RAT	132.72	13	13	2387700	7	7	9		36148	Succinate--CoA ligase [ADP/GDP-forming] subunit alpha mitochondrial OS=Rattus norvegicus OX=10116 GN=Suclg1 PE=2 SV=2
57	177	tr|A0A0H2UHE1|A0A0H2UHE1_RAT	132.72	13	13	2387700	7	7	9		37560	Succinate--CoA ligase [ADP/GDP-forming] subunit alpha mitochondrial OS=Rattus norvegicus OX=10116 GN=Suclg1 PE=1 SV=1
54	243	tr|D3ZS58|D3ZS58_RAT	127.97	33	33	4109600	5	5	11	Oxidation (M)	10845	NADH dehydrogenase [ubiquinone] 1 alpha subcomplex subunit 2 OS=Rattus norvegicus OX=10116 GN=Ndufa2 PE=1 SV=1
50	148	tr|Q5RJN0|Q5RJN0_RAT	127.63	19	19	7106500	8	8	12	Oxidation (M)	23945	NADH dehydrogenase (Ubiquinone) Fe-S protein 7 OS=Rattus norvegicus OX=10116 GN=Ndufs7 PE=1 SV=1
58	286	tr|A9UMV9|A9UMV9_RAT	126.35	21	21	9446400	4	4	9		12500	NADH:ubiquinone oxidoreductase subunit A7 OS=Rattus norvegicus OX=10116 GN=Ndufa7 PE=1 SV=1
56	100	P17764|THIL_RAT	123.72	14	14	3200000	8	8	9		44695	Acetyl-CoA acetyltransferase mitochondrial OS=Rattus norvegicus OX=10116 GN=Acat1 PE=1 SV=1
42	171	tr|Q8SEZ8|Q8SEZ8_RAT	121.52	20	20	7158600	11	11	15	Oxidation (M)	36133	NADH-ubiquinone oxidoreductase chain 1 (Fragment) OS=Rattus norvegicus OX=10116 GN=NADH1 PE=3 SV=1
42	172	P03889|NU1M_RAT	121.52	20	20	7158600	11	11	15	Oxidation (M)	36145	NADH-ubiquinone oxidoreductase chain 1 OS=Rattus norvegicus OX=10116 GN=Mtnd1 PE=1 SV=3
42	173	tr|Q8HID1|Q8HID1_RAT	121.52	20	20	7158600	11	11	15	Oxidation (M)	36145	NADH-ubiquinone oxidoreductase chain 1 OS=Rattus norvegicus OX=10116 GN=Mt-nd1 PE=3 SV=1
42	174	tr|D2E6L7|D2E6L7_RAT	121.52	20	20	7158600	11	11	15	Oxidation (M)	36062	NADH-ubiquinone oxidoreductase chain 1 OS=Rattus norvegicus OX=10116 GN=ND1 PE=3 SV=1
66	231	tr|Q5M949|Q5M949_RAT	120.72	17	17	1291400	6	6	7		28340	Nipsnap homolog 3A (C. elegans) OS=Rattus norvegicus OX=10116 GN=Nipsnap3b PE=1 SV=1
61	248	tr|B2RYW3|B2RYW3_RAT	110.97	23	23	5436500	7	7	8	Oxidation (M)	21892	NADH dehydrogenase (Ubiquinone) 1 beta subcomplex 9 OS=Rattus norvegicus OX=10116 GN=Ndufb9 PE=1 SV=1
116	261	P24329|THTR_RAT	109.2	9	9	296200	2	2	2		33407	Thiosulfate sulfurtransferase OS=Rattus norvegicus OX=10116 GN=Tst PE=1 SV=3
47	251	tr|A0A0A1G491|A0A0A1G491_RAT	107.04	21	21	2051300	10	10	13		38542	NADH-ubiquinone oxidoreductase chain 2 OS=Rattus norvegicus OX=10116 GN=ND2 PE=3 SV=1
47	252	tr|Q5UAJ8|Q5UAJ8_RAT	107.04	21	21	2051300	10	10	13		38455	NADH-ubiquinone oxidoreductase chain 2 OS=Rattus norvegicus OX=10116 GN=ND2 PE=3 SV=1
52	216	Q7TQ16|QCR8_RAT	106.31	43	43	4230900	9	9	11		9849	Cytochrome b-c1 complex subunit 8 OS=Rattus norvegicus OX=10116 GN=Uqcrq PE=3 SV=1
62	291	tr|Q5XFW4|Q5XFW4_RAT	105.57	20	20	3095700	5	5	8		20541	Mitochondrial ribosomal protein L13 OS=Rattus norvegicus OX=10116 GN=Mrpl13 PE=1 SV=1
64	169	Q60587|ECHB_RAT	103.51	14	14	1928000	7	7	8		51414	Trifunctional enzyme subunit beta mitochondrial OS=Rattus norvegicus OX=10116 GN=Hadhb PE=1 SV=1
72	350	tr|Q35733|Q35733_RAT	98.83	14	14	870830	4	4	5		8389	NADH-ubiquinone oxidoreductase chain 6 (Fragment) OS=Rattus norvegicus OX=10116 PE=3 SV=1
72	351	tr|Q06QD9|Q06QD9_RAT	98.83	6	6	870830	4	4	5		18943	NADH-ubiquinone oxidoreductase chain 6 OS=Rattus norvegicus OX=10116 GN=ND6 PE=3 SV=1
72	352	tr|Q7HKW2|Q7HKW2_RAT	98.83	6	6	870830	4	4	5		18957	NADH-ubiquinone oxidoreductase chain 6 OS=Rattus norvegicus OX=10116 GN=NADH6 PE=3 SV=1
82	179	P11240|COX5A_RAT	96.51	23	23	2306100	3	3	4		16130	Cytochrome c oxidase subunit 5A mitochondrial OS=Rattus norvegicus OX=10116 GN=Cox5a PE=1 SV=1
68	6	Q01205|ODO2_RAT	95.86	13	13	1289300	5	5	5		48925	Dihydrolipoyllysine-residue succinyltransferase component of 2-oxoglutarate dehydrogenase complex mitochondrial OS=Rattus norvegicus OX=10116 GN=Dlst PE=1 SV=2
68	5	tr|G3V6P2|G3V6P2_RAT	95.86	13	13	1289300	5	5	5		48899	Dihydrolipoamide S-succinyltransferase (E2 component of 2-oxo-glutarate complex) isoform CRA_a OS=Rattus norvegicus OX=10116 GN=Dlst PE=1 SV=1
63	266	P04762|CATA_RAT	94.02	6	6	955480	7	7	8		59757	Catalase OS=Rattus norvegicus OX=10116 GN=Cat PE=1 SV=3
109	273	tr|A0A0G2JVH4|A0A0G2JVH4_RAT	87.78	3	3	420720	2	2	2		86230	MICOS complex subunit MIC60 OS=Rattus norvegicus OX=10116 GN=Immt PE=1 SV=1
109	276	tr|A0A140TAG5|A0A140TAG5_RAT	87.78	4	4	420720	2	2	2		67049	MICOS complex subunit MIC60 OS=Rattus norvegicus OX=10116 GN=Immt PE=1 SV=1
109	277	Q3KR86|MIC60_RAT	87.78	4	4	420720	2	2	2		67177	MICOS complex subunit Mic60 (Fragment) OS=Rattus norvegicus OX=10116 GN=Immt PE=1 SV=1
87	198	P85834|EFTU_RAT	83.9	5	5	366150	2	2	3		49522	Elongation factor Tu mitochondrial OS=Rattus norvegicus OX=10116 GN=Tufm PE=1 SV=1
89	228	P16970|ABCD3_RAT	79.65	4	4	4123500	3	3	3		75316	ATP-binding cassette sub-family D member 3 OS=Rattus norvegicus OX=10116 GN=Abcd3 PE=1 SV=3
70	244	P07824|ARGI1_RAT	79.62	13	13	1173100	4	4	5		34973	Arginase-1 OS=Rattus norvegicus OX=10116 GN=Arg1 PE=1 SV=2
65	230	tr|B2RYS2|B2RYS2_RAT	78.1	28	28	5627900	6	6	8		13559	Cytochrome b-c1 complex subunit 7 OS=Rattus norvegicus OX=10116 GN=Uqcrb PE=1 SV=1
74	16	tr|F1LN92|F1LN92_RAT	73.65	5	5	2110000	4	4	4		89352	AFG3-like matrix AAA peptidase subunit 2 OS=Rattus norvegicus OX=10116 GN=Afg3l2 PE=1 SV=1
80	7	Q4FZT0|STML2_RAT	73.61	7	7	436230	3	3	4		38414	Stomatin-like protein 2 mitochondrial OS=Rattus norvegicus OX=10116 GN=Stoml2 PE=1 SV=1
98	194	Q9R063|PRDX5_RAT	73.05	13	13	814740	3	3	3		22179	Peroxiredoxin-5 mitochondrial OS=Rattus norvegicus OX=10116 GN=Prdx5 PE=1 SV=1
98	195	tr|A0A0G2JSS8|A0A0G2JSS8_RAT	73.05	13	13	814740	3	3	3		22207	Peroxiredoxin OS=Rattus norvegicus OX=10116 GN=Prdx5 PE=1 SV=1
49	1309	tr|B2GUW4|B2GUW4_RAT	71.58	2	2	15700000	6	6	12		74060	Exdl2 protein OS=Rattus norvegicus OX=10116 GN=Exd2 PE=2 SV=1
194	814	P45953|ACADV_RAT	69.12	3	3	158370	1	1	1		70749	Very long-chain specific acyl-CoA dehydrogenase mitochondrial OS=Rattus norvegicus OX=10116 GN=Acadvl PE=1 SV=1
194	815	tr|Q5M9H2|Q5M9H2_RAT	69.12	3	3	158370	1	1	1		70821	Acyl-Coenzyme A dehydrogenase very long chain OS=Rattus norvegicus OX=10116 GN=Acadvl PE=1 SV=1
99	5949	tr|B2RYU0|B2RYU0_RAT	68.6	9	9	1334300	3	3	3		11842	NADH dehydrogenase (Ubiquinone) 1 beta subcomplex 2 (Predicted) isoform CRA_b OS=Rattus norvegicus OX=10116 GN=Ndufb2 PE=1 SV=1
145	232	tr|M0R6J0|M0R6J0_RAT	67.31	6	6	406020	2	2	2		38374	Mitochondrial ribosomal protein L39 OS=Rattus norvegicus OX=10116 GN=Mrpl39 PE=1 SV=2
112	5937	Q6PDU7|ATP5L_RAT	65.67	17	17	747970	2	2	2		11433	ATP synthase subunit g mitochondrial OS=Rattus norvegicus OX=10116 GN=Atp5mg PE=1 SV=2
78	385	tr|B1WBP7|B1WBP7_RAT	61.44	24	24	2445800	3	3	4		12884	ATP synthase subunit delta mitochondrial OS=Rattus norvegicus OX=10116 GN=Atp5f1d PE=1 SV=1
78	387	tr|G3V7Y3|G3V7Y3_RAT	61.44	17	17	2445800	3	3	4		17563	ATP synthase subunit delta mitochondrial OS=Rattus norvegicus OX=10116 GN=Atp5f1d PE=1 SV=1
146	153	tr|Q06QA9|Q06QA9_RAT	59.76	4	4	388740	2	2	2		56893	Cytochrome c oxidase subunit 1 OS=Rattus norvegicus OX=10116 GN=CO1 PE=3 SV=1
146	154	tr|Q06QK0|Q06QK0_RAT	59.76	4	4	388740	2	2	2		56880	Cytochrome c oxidase subunit 1 OS=Rattus norvegicus OX=10116 GN=CO1 PE=3 SV=1
146	155	tr|Q8SEZ6|Q8SEZ6_RAT	59.76	4	4	388740	2	2	2		56879	Cytochrome c oxidase subunit 1 OS=Rattus norvegicus OX=10116 GN=COI PE=3 SV=1
146	156	tr|A0A0A1FZ34|A0A0A1FZ34_RAT	59.76	4	4	388740	2	2	2		56937	Cytochrome c oxidase subunit 1 OS=Rattus norvegicus OX=10116 GN=COX1 PE=3 SV=1
146	157	tr|Q8HIC9|Q8HIC9_RAT	59.76	4	4	388740	2	2	2		56845	Cytochrome c oxidase subunit 1 OS=Rattus norvegicus OX=10116 GN=Mt-co1 PE=3 SV=1
146	158	P05503|COX1_RAT	59.76	4	4	388740	2	2	2		56845	Cytochrome c oxidase subunit 1 OS=Rattus norvegicus OX=10116 GN=Mtco1 PE=2 SV=3
146	159	tr|Q95938|Q95938_RAT	59.76	4	4	388740	2	2	2		56977	Cytochrome c oxidase subunit 1 OS=Rattus norvegicus OX=10116 GN=Co I PE=3 SV=1
132	343	tr|D3ZX69|D3ZX69_RAT	55.71	5	5	484230	1	1	2		29466	39S ribosomal protein L10 mitochondrial OS=Rattus norvegicus OX=10116 GN=Mrpl10 PE=1 SV=1
132	344	P0C2C4|RM10_RAT	55.71	5	5	484230	1	1	2		29940	39S ribosomal protein L10 mitochondrial OS=Rattus norvegicus OX=10116 GN=Mrpl10 PE=1 SV=1
149	5951	tr|B2RZ57|B2RZ57_RAT	52.7	8	8	267140	2	2	2		20651	Mitochondrial ribosomal protein L18 OS=Rattus norvegicus OX=10116 GN=Mrpl18 PE=1 SV=1
264	1398	Q5PQN9|RM38_RAT	52.03	3	3	0	1	1	1		44838	39S ribosomal protein L38 mitochondrial OS=Rattus norvegicus OX=10116 GN=Mrpl38 PE=2 SV=2
147	290	tr|Q4G067|Q4G067_RAT	50.43	8	8	179840	2	2	2		37440	Mitochondrial ribosomal protein L44 OS=Rattus norvegicus OX=10116 GN=Mrpl44 PE=1 SV=1
195	5938	Q06647|ATPO_RAT	50.22	4	4	162060	1	1	1		23398	ATP synthase subunit O mitochondrial OS=Rattus norvegicus OX=10116 GN=Atp5po PE=1 SV=1
9	368	tr|A0A0G2JWK2|A0A0G2JWK2_RAT	49	1	1	2266200	1	1	97		53049	Methyl-CpG-binding protein 2 OS=Rattus norvegicus OX=10116 GN=Mecp2 PE=1 SV=1
9	369	Q00566|MECP2_RAT	49	1	1	2266200	1	1	97		53048	Methyl-CpG-binding protein 2 OS=Rattus norvegicus OX=10116 GN=Mecp2 PE=1 SV=1
83	483	tr|D4A4P3|D4A4P3_RAT	45.99	15	15	1958000	2	2	4		11267	NADH:ubiquinone oxidoreductase subunit B3 OS=Rattus norvegicus OX=10116 GN=Ndufb3 PE=1 SV=1
117	245	P18163|ACSL1_RAT	45.77	3	3	283280	2	1	2		78179	Long-chain-fatty-acid--CoA ligase 1 OS=Rattus norvegicus OX=10116 GN=Acsl1 PE=1 SV=1
131	416	tr|Q5UAJ5|Q5UAJ5_RAT	45.76	13	13	1402900	1	1	2		7642	ATP synthase protein 8 OS=Rattus norvegicus OX=10116 GN=ATP8 PE=3 SV=1
131	418	tr|Q8SEZ4|Q8SEZ4_RAT	45.76	13	13	1402900	1	1	2		7632	ATP synthase protein 8 OS=Rattus norvegicus OX=10116 GN=ATPase8 PE=3 SV=1
131	417	P11608|ATP8_RAT	45.76	13	13	1402900	1	1	2		7630	ATP synthase protein 8 OS=Rattus norvegicus OX=10116 GN=Mt-atp8 PE=1 SV=2
131	419	tr|Q8HIC8|Q8HIC8_RAT	45.76	13	13	1402900	1	1	2		7630	ATP synthase protein 8 OS=Rattus norvegicus OX=10116 GN=Mt-atp8 PE=3 SV=1
67	816	tr|Q5U2T0|Q5U2T0_RAT	45.3	5	5	155810	3	2	5		44494	Death associated protein 3 OS=Rattus norvegicus OX=10116 GN=Dap3 PE=2 SV=1
67	817	tr|F7EZZ0|F7EZZ0_RAT	45.3	5	5	155810	3	2	5		45112	Death-associated protein 3 OS=Rattus norvegicus OX=10116 GN=Dap3 PE=1 SV=1
217	284	tr|A0A0G2K8Q8|A0A0G2K8Q8_RAT	44.38	13	13	193170	1	1	1		7099	Ubiquinol-cytochrome c reductase complex III subunit X OS=Rattus norvegicus OX=10116 GN=Uqcr10 PE=1 SV=1
217	285	tr|B2RYX1|B2RYX1_RAT	44.38	12	12	193170	1	1	1		7462	LOC685322 protein OS=Rattus norvegicus OX=10116 GN=Uqcr10 PE=2 SV=1
129	81	tr|S5RZM8|S5RZM8_RAT	44.18	9	9	445790	2	2	2	Oxidation (M)	25958	Cytochrome c oxidase subunit 2 OS=Rattus norvegicus OX=10116 GN=COX2 PE=3 SV=1
129	82	P00406|COX2_RAT	44.18	9	9	445790	2	2	2	Oxidation (M)	25928	Cytochrome c oxidase subunit 2 OS=Rattus norvegicus OX=10116 GN=Mtco2 PE=1 SV=3
129	41	tr|Q5UAJ6|Q5UAJ6_RAT	44.18	9	9	445790	2	2	2	Oxidation (M)	25942	Cytochrome c oxidase subunit 2 OS=Rattus norvegicus OX=10116 GN=COX2 PE=3 SV=1
129	83	tr|Q8SEZ5|Q8SEZ5_RAT	44.18	9	9	445790	2	2	2	Oxidation (M)	25928	Cytochrome c oxidase subunit 2 OS=Rattus norvegicus OX=10116 GN=Mt-co2 PE=1 SV=1
129	84	tr|A0A097PE04|A0A097PE04_RAT	44.18	9	9	445790	2	2	2	Oxidation (M)	25894	Cytochrome c oxidase subunit 2 OS=Rattus norvegicus OX=10116 GN=COX2 PE=3 SV=1
266	354	tr|Q3B8N9|Q3B8N9_RAT	43.61	3	3	167490	1	1	1		32823	Biphenyl hydrolase-like OS=Rattus norvegicus OX=10116 GN=Bphl PE=1 SV=1
265	300	tr|A0A0G2K9B4|A0A0G2K9B4_RAT	42.99	4	4	281210	1	1	1		33652	Mitochondrial ribosomal protein L15 OS=Rattus norvegicus OX=10116 GN=Mrpl15 PE=1 SV=1
215	5939	P56571|ES1_RAT	40.42	4	4	171090	1	1	1		28173	ES1 protein homolog mitochondrial OS=Rattus norvegicus OX=10116 PE=1 SV=2
107	324	P33124|ACSL6_RAT	39.77	2	2		2	0	2		78180	Long-chain-fatty-acid--CoA ligase 6 OS=Rattus norvegicus OX=10116 GN=Acsl6 PE=1 SV=1
118	326	P05696|KPCA_RAT	39.51	1	1	488200	1	1	2		76792	Protein kinase C alpha type OS=Rattus norvegicus OX=10116 GN=Prkca PE=1 SV=3
73	5959	D3ZS74|OMA1_RAT	38.19	1	1	1353500	2	1	5		57145	Metalloendopeptidase OMA1 mitochondrial OS=Rattus norvegicus OX=10116 GN=Oma1 PE=3 SV=1
268	233	P29147|BDH_RAT	37.75	3	3	152550	1	1	1		38202	D-beta-hydroxybutyrate dehydrogenase mitochondrial OS=Rattus norvegicus OX=10116 GN=Bdh1 PE=1 SV=2
268	234	tr|A0A0G2JSH2|A0A0G2JSH2_RAT	37.75	3	3	152550	1	1	1		38333	3-hydroxybutyrate dehydrogenase type 1 isoform CRA_a OS=Rattus norvegicus OX=10116 GN=Bdh1 PE=1 SV=1
267	357	tr|D3ZLT1|D3ZLT1_RAT	37.73	16	16	264970	1	1	1	Oxidation (M)	16568	NADH dehydrogenase (Ubiquinone) 1 beta subcomplex 7 (Predicted) OS=Rattus norvegicus OX=10116 GN=Ndufb7 PE=1 SV=1
269	346	Q63750|RM23_RAT	36.9	17	17	147460	1	1	1		17050	39S ribosomal protein L23 mitochondrial OS=Rattus norvegicus OX=10116 GN=Mrpl23 PE=2 SV=1
148	495	tr|D4ACN9|D4ACN9_RAT	36.42	4	4	560530	2	1	2		34267	Solute carrier family 25 member 36 OS=Rattus norvegicus OX=10116 GN=Slc25a36 PE=3 SV=1
218	226	tr|D3ZXF9|D3ZXF9_RAT	36.28	4	4	0	1	1	1		29441	Mitochondrial ribosomal protein L12 OS=Rattus norvegicus OX=10116 GN=Mrpl12 PE=1 SV=1
151	406	tr|D3ZD23|D3ZD23_RAT	34.51	1	1	986710	2	2	2		67300	ATP-binding cassette subfamily E member 1 OS=Rattus norvegicus OX=10116 GN=Abce1 PE=1 SV=1
270	312	P0DN35|NDUB1_RAT	34.45	19	19	220450	1	1	1		6998	NADH dehydrogenase [ubiquinone] 1 beta subcomplex subunit 1 OS=Rattus norvegicus OX=10116 GN=Ndufb1 PE=3 SV=1
128	341	Q63563|ABCC9_RAT	34.26	1	1	1248700	2	1	2		174117	ATP-binding cassette sub-family C member 9 OS=Rattus norvegicus OX=10116 GN=Abcc9 PE=1 SV=1
75	382	Q01062|PDE2A_RAT	32.62	2	2	2221600	2	1	4		104664	cGMP-dependent 3' 5'-cyclic phosphodiesterase OS=Rattus norvegicus OX=10116 GN=Pde2a PE=1 SV=2
75	383	tr|F8WFW5|F8WFW5_RAT	32.62	2	2	2221600	2	1	4		105234	Phosphodiesterase OS=Rattus norvegicus OX=10116 GN=Pde2a PE=1 SV=1
216	293	Q9WVK3|PECR_RAT	32.33	3	3	376800	1	1	1	Oxidation (M)	32433	Peroxisomal trans-2-enoyl-CoA reductase OS=Rattus norvegicus OX=10116 GN=Pecr PE=2 SV=1
216	294	tr|A0A0G2JVG4|A0A0G2JVG4_RAT	32.33	3	3	376800	1	1	1	Oxidation (M)	32737	Peroxisomal trans-2-enoyl-CoA reductase OS=Rattus norvegicus OX=10116 GN=Pecr PE=1 SV=1
93	5952	tr|Q99PW9|Q99PW9_RAT	31.72	2	2	1055300	3	2	3		120572	Huntingtin interacting protein 1 related (Fragment) OS=Rattus norvegicus OX=10116 GN=Hip1r PE=2 SV=1
141	5978	tr|A0A0G2K2T2|A0A0G2K2T2_RAT	31.29	1	1	186260	2	1	2		67482	Mitoguardin 1 OS=Rattus norvegicus OX=10116 GN=Miga1 PE=4 SV=1
141	6015	tr|D4A5P3|D4A5P3_RAT	31.29	1	1	186260	2	1	2		59813	Mitoguardin 1 OS=Rattus norvegicus OX=10116 GN=Miga1 PE=4 SV=1
136	696	Q62600|NOS3_RAT	30.17	1	1	2090400	2	1	2	Formylation	133290	Nitric oxide synthase endothelial OS=Rattus norvegicus OX=10116 GN=Nos3 PE=1 SV=4
271	279	Q5M9I5|QCR6_RAT	2020-07-30	12	12	391320	1	1	1		10424	Cytochrome b-c1 complex subunit 6 mitochondrial OS=Rattus norvegicus OX=10116 GN=Uqcrh PE=3 SV=1
101	5976	P04694|ATTY_RAT	29.27	5	5	219300	2	1	3	Carbamidomethylation	50635	Tyrosine aminotransferase OS=Rattus norvegicus OX=10116 GN=Tat PE=1 SV=1
91	752	tr|D4A5Q9|D4A5Q9_RAT	29.25	2	2	224950	2	1	3		98548	Glycine decarboxylase OS=Rattus norvegicus OX=10116 GN=Gldc PE=1 SV=1
272	347	P80433|COX8A_RAT	29.16	14	14	183650	1	1	1		7672	Cytochrome c oxidase subunit 8A mitochondrial OS=Rattus norvegicus OX=10116 GN=Cox8a PE=1 SV=3
85	441	P11530|DMD_RAT	28.69	0	0	1019200	2	1	3		425830	Dystrophin OS=Rattus norvegicus OX=10116 GN=Dmd PE=1 SV=2
100	5972	tr|A0A0G2KAB9|A0A0G2KAB9_RAT	28.53	4	4	0	2	1	3		28715	Autophagy protein 5 OS=Rattus norvegicus OX=10116 GN=Atg5 PE=1 SV=1
100	5977	Q3MQ06|ATG5_RAT	28.53	4	4	0	2	1	3		32398	Autophagy protein 5 OS=Rattus norvegicus OX=10116 GN=Atg5 PE=2 SV=1
103	6010	P60924|DELE1_RAT	28.41	3	3	677730	2	1	3		55250	DAP3-binding cell death enhancer 1 OS=Rattus norvegicus OX=10116 GN=Dele1 PE=2 SV=1
273	338	tr|A0A0G2JYU2|A0A0G2JYU2_RAT	28.24	4	4	1046900	1	1	1		20750	Mitochondrial ribosomal protein L11 OS=Rattus norvegicus OX=10116 GN=mrpl11 PE=1 SV=1
273	339	Q5XIE3|RM11_RAT	28.24	4	4	1046900	1	1	1		22420	39S ribosomal protein L11 mitochondrial OS=Rattus norvegicus OX=10116 GN=Mrpl11 PE=2 SV=1
120	5940	tr|Q8M7G5|Q8M7G5_RAT	27.79	5	5	356840	1	1	2	Oxidation (M)	24240	ATP synthase subunit a (Fragment) OS=Rattus norvegicus OX=10116 PE=2 SV=1
120	5941	tr|Q549I0|Q549I0_RAT	27.79	5	5	356840	1	1	2	Oxidation (M)	25050	ATP synthase subunit a OS=Rattus norvegicus OX=10116 GN=atp6 PE=4 SV=1
120	5942	P05504|ATP6_RAT	27.79	5	5	356840	1	1	2	Oxidation (M)	25076	ATP synthase subunit a OS=Rattus norvegicus OX=10116 GN=Mt-atp6 PE=1 SV=3
120	5943	tr|Q8HIC7|Q8HIC7_RAT	27.79	5	5	356840	1	1	2	Oxidation (M)	25076	ATP synthase subunit a OS=Rattus norvegicus OX=10116 GN=Mt-atp6 PE=4 SV=1
120	5944	tr|S5S1E9|S5S1E9_RAT	27.79	5	5	356840	1	1	2	Oxidation (M)	25049	ATP synthase subunit a OS=Rattus norvegicus OX=10116 GN=ATP6 PE=4 SV=1
120	5945	tr|Q06QE5|Q06QE5_RAT	27.79	5	5	356840	1	1	2	Oxidation (M)	25075	ATP synthase subunit a OS=Rattus norvegicus OX=10116 GN=ATP6 PE=4 SV=1
120	5946	tr|Q8SEZ3|Q8SEZ3_RAT	27.79	5	5	356840	1	1	2	Oxidation (M)	25030	ATP synthase subunit a OS=Rattus norvegicus OX=10116 GN=ATPase6 PE=4 SV=1
274	162	tr|Q5EBA4|Q5EBA4_RAT	27.41	2	2	0	1	1	1		33215	Nipsnap1 protein (Fragment) OS=Rattus norvegicus OX=10116 GN=Nipsnap1 PE=2 SV=1
274	163	tr|G3V728|G3V728_RAT	27.41	2	2	0	1	1	1		33346	4-nitrophenylphosphatase domain and non-neuronal SNAP25-like protein homolog 1 (C. elegans) isoform CRA_b OS=Rattus norvegicus OX=10116 GN=Nipsnap1 PE=1 SV=1
135	525	tr|A0A096MJ87|A0A096MJ87_RAT	27.35	9	9	4146400	2	2	2	Formylation	21509	Septin 4 (Fragment) OS=Rattus norvegicus OX=10116 GN=Sept4 PE=1 SV=6
275	5960	tr|D3ZJH9|D3ZJH9_RAT	26.99	1	1	3982700	1	1	1	Formylation	65352	Malic enzyme OS=Rattus norvegicus OX=10116 GN=Me2 PE=1 SV=1
275	5961	tr|A0A0G2K502|A0A0G2K502_RAT	26.99	1	1	3982700	1	1	1	Formylation	66310	Malic enzyme OS=Rattus norvegicus OX=10116 GN=Me2 PE=1 SV=1
176	5933	O35800|HIF1A_RAT	26.18	1	1	0	1	1	1		92319	Hypoxia-inducible factor 1-alpha OS=Rattus norvegicus OX=10116 GN=Hif1a PE=2 SV=1
176	5934	tr|D4A8P8|D4A8P8_RAT	26.18	1	1	0	1	1	1		92336	Hypoxia-inducible factor 1-alpha OS=Rattus norvegicus OX=10116 GN=Hif1a PE=4 SV=2
197	5947	Q924S5|LONM_RAT	2020-08-25	1	1	93145	1	1	1		105792	Lon protease homolog mitochondrial OS=Rattus norvegicus OX=10116 GN=Lonp1 PE=2 SV=1
168	317	tr|A0A0G2JYD4|A0A0G2JYD4_RAT	2020-05-25	0	0	0	1	1	1		487857	Vacuolar protein sorting 13 homolog D OS=Rattus norvegicus OX=10116 GN=Vps13d PE=1 SV=1
168	318	tr|D3ZKC6|D3ZKC6_RAT	2020-05-25	0	0	0	1	1	1		488962	Vacuolar protein sorting 13 homolog D OS=Rattus norvegicus OX=10116 GN=Vps13d PE=1 SV=1
155	455	P35559|IDE_RAT	24.14	2	2	188020	2	2	2	Carbamidomethylation		Insulin-degrading enzyme
144	864	Q05343|RXRA_RAT	2020-11-24	3	3	141700	2	1	2		51266	Retinoic acid receptor RXR-alpha OS=Rattus norvegicus OX=10116 GN=Rxra PE=1 SV=1
108	1371	tr|M0RAQ6|M0RAQ6_RAT	23.57	2	2	313120	2	2	2		99557	Hexokinase-1 OS=Rattus norvegicus OX=10116 GN=Hk1 PE=1 SV=2
108	1372	P05708|HXK1_RAT	23.57	2	2	313120	2	2	2		102408	Hexokinase-1 OS=Rattus norvegicus OX=10116 GN=Hk1 PE=1 SV=4
123	1292	tr|G3V6I4|G3V6I4_RAT	23.29	5	5	83351	1	1	2		37791	Mitochondrial amidoxime reducing component 1 OS=Rattus norvegicus OX=10116 GN=Marc1 PE=1 SV=1
138	374	P48037|ANXA6_RAT	2020-11-23	1	1	1153400	1	1	2		75754	Annexin A6 OS=Rattus norvegicus OX=10116 GN=Anxa6 PE=1 SV=2
138	375	tr|Q6IMZ3|Q6IMZ3_RAT	2020-11-23	1	1	1153400	1	1	2		75756	Annexin OS=Rattus norvegicus OX=10116 GN=Anxa6 PE=1 SV=1
221	793	tr|A0A0G2KAN7|A0A0G2KAN7_RAT	22.92	1	1	470390	1	1	1		65838	Glutaminase kidney isoform mitochondrial OS=Rattus norvegicus OX=10116 GN=Gls PE=1 SV=1
221	1207	tr|A0A0G2K1T0|A0A0G2K1T0_RAT	22.92	1	1	470390	1	1	1		73866	Glutaminase kidney isoform mitochondrial OS=Rattus norvegicus OX=10116 GN=Gls PE=1 SV=1
221	1208	P13264|GLSK_RAT	22.92	1	1	470390	1	1	1		74024	Glutaminase kidney isoform mitochondrial OS=Rattus norvegicus OX=10116 GN=Gls PE=1 SV=2
220	5964	tr|B0BNI6|B0BNI6_RAT	22.91	4	4	393170	1	1	1		32492	Similar to solute carrier family 25 member 35 isoform CRA_a OS=Rattus norvegicus OX=10116 GN=Slc25a35 PE=1 SV=1
169	456	tr|A0A0G2K5L6|A0A0G2K5L6_RAT	22.75	0	0	0	1	1	1		275755	Acetyl-CoA carboxylase beta OS=Rattus norvegicus OX=10116 GN=Acacb PE=1 SV=1
169	457	tr|A0A0G2K1F2|A0A0G2K1F2_RAT	22.75	0	0	0	1	1	1		276393	Acetyl-CoA carboxylase beta OS=Rattus norvegicus OX=10116 GN=Acacb PE=1 SV=1
169	459	tr|D3ZBE2|D3ZBE2_RAT	22.75	0	0	0	1	1	1		275967	Acetyl-CoA carboxylase beta OS=Rattus norvegicus OX=10116 GN=Acacb PE=1 SV=3
169	460	tr|E9PSQ0|E9PSQ0_RAT	22.75	0	0	0	1	1	1		276255	Acetyl-CoA carboxylase beta OS=Rattus norvegicus OX=10116 GN=Acacb PE=1 SV=2
169	458	tr|O70151|O70151_RAT	22.75	0	0	0	1	1	1		276097	Acetyl-CoA carboxylase OS=Rattus norvegicus OX=10116 GN=Acacb PE=2 SV=1
169	545	P11497|ACACA_RAT	22.75	0	0	0	1	1	1		265191	Acetyl-CoA carboxylase 1 OS=Rattus norvegicus OX=10116 GN=Acaca PE=1 SV=1
224	753	P08011|MGST1_RAT	22.33	8	8	24873	1	1	1		17472	Microsomal glutathione S-transferase 1 OS=Rattus norvegicus OX=10116 GN=Mgst1 PE=1 SV=3
224	754	tr|B6DYQ4|B6DYQ4_RAT	22.33	8	8	24873	1	1	1		17472	Microsomal glutathione S-transferase OS=Rattus norvegicus OX=10116 GN=Mgst1 PE=2 SV=1
94	5968	Q9Z2P5|RIPK3_RAT	22.31	2	2	3542400	1	1	3		52218	Receptor-interacting serine/threonine-protein kinase 3 OS=Rattus norvegicus OX=10116 GN=Ripk3 PE=1 SV=3
222	774	tr|D3ZB81|D3ZB81_RAT	2020-09-22	3	3	0	1	1	1		35227	Solute carrier family 25 member 31 OS=Rattus norvegicus OX=10116 GN=Slc25a31 PE=3 SV=3
222	1195	tr|A0A1W2Q6F5|A0A1W2Q6F5_RAT	2020-09-22	5	5	0	1	1	1		20418	Solute carrier family 25 member 31 (Fragment) OS=Rattus norvegicus OX=10116 GN=Slc25a31 PE=3 SV=1
202	1217	tr|D4AB75|D4AB75_RAT	21.89	1	1	203230	1	1	1		113160	Zinc finger protein 217 OS=Rattus norvegicus OX=10116 GN=Zfp217 PE=1 SV=1
279	557	Q9WVK7|HCDH_RAT	21.57	3	3	157770	1	1	1		34448	Hydroxyacyl-coenzyme A dehydrogenase mitochondrial OS=Rattus norvegicus OX=10116 GN=Hadh PE=2 SV=1
77	987	Q9JIR0|RIMB1_RAT	21.5	0	0	2473200	1	1	4		200202	Peripheral-type benzodiazepine receptor-associated protein 1 OS=Rattus norvegicus OX=10116 GN=Tspoap1 PE=1 SV=2
77	688	tr|F1LPI6|F1LPI6_RAT	21.5	0	0	2473200	1	1	4		200075	Peripheral-type benzodiazepine receptor-associated protein 1 OS=Rattus norvegicus OX=10116 GN=Tspoap1 PE=4 SV=1
200	622	Q62812|MYH9_RAT	21.25	1	1	82548	1	1	1		226336	Myosin-9 OS=Rattus norvegicus OX=10116 GN=Myh9 PE=1 SV=3
183	541	tr|F1M9H4|F1M9H4_RAT	20.49	0	0	5630800	1	1	1		225602	HIVEP zinc finger 1 OS=Rattus norvegicus OX=10116 GN=Hivep1 PE=1 SV=2
227	770	tr|Q5XHZ7|Q5XHZ7_RAT	20.45	1	1	0	1	1	1		66660	MMR_HSR1 domain containing protein RGD1359460 OS=Rattus norvegicus OX=10116 GN=Noa1 PE=2 SV=1
227	771	tr|A0A0G2JUI4|A0A0G2JUI4_RAT	20.45	1	1	0	1	1	1		66708	Nitric oxide-associated 1 OS=Rattus norvegicus OX=10116 GN=Noa1 PE=4 SV=1
227	789	tr|A0A0G2K602|A0A0G2K602_RAT	20.45	1	1	0	1	1	1		77504	MMR_HSR1 domain containing protein RGD1359460 isoform CRA_a OS=Rattus norvegicus OX=10116 GN=Noa1 PE=4 SV=1

## Sheet: RLM SM-BM Control III(2)-IVx
Protein Group	Protein ID	Accession	-10lgP	Coverage (%)	Coverage (%) Sample 6	IBAQ	#Peptides	#Unique	#Spec Sample 6	PTM	Avg. Mass	Description
1	35	P52873|PYC_RAT	390.62	56	56	296960000	232	227	461	Oxidation (M)
1	34	tr|A0A0G2JTL5|A0A0G2JTL5_RAT	390.62	51	51	296960000	232	227	461	Oxidation (M)
4	17	P10719|ATPB_RAT	351.65	57	57	267480000	126	124	249	Oxidation (M)
4	18	tr|G3V6D3|G3V6D3_RAT	351.65	57	57	267480000	126	124	249	Oxidation (M)
3	8	P07756|CPSM_RAT	350.04	48	48	156940000	190	186	307	Carbamidomethylation		Carbamoyl-phosphate synthase [ammonia], mitochondrial
2	20	P15999|ATPA_RAT	329.29	55	55	271000000	141	140	366	Oxidation (M)	59754	ATP synthase subunit alpha mitochondrial OS=Rattus norvegicus OX=10116 GN=Atp5f1a PE=1 SV=2
2	21	tr|F1LP05|F1LP05_RAT	329.29	55	55	271000000	141	140	366	Oxidation (M)	59813	ATP synthase subunit alpha OS=Rattus norvegicus OX=10116 GN=Atp5f1a PE=1 SV=1
5	1	Q02253|MMSA_RAT	293.76	50	50	43721000	70	69	120	Carbamidomethylation		Methylmalonate-semialdehyde dehydrogenase [acylating], mitochondrial
5	2	tr|G3V7J0|G3V7J0_RAT	293.76	50	50	43721000	70	69	120	Carbamidomethylation		Aldehyde dehydrogenase family 6, subfamily A1, isoform CRA_b
10	289	tr|D3ZFJ6|D3ZFJ6_RAT	273.45	34	34	30730000	43	43	66	Carbamidomethylation	60420	Lactamase beta OS=Rattus norvegicus OX=10116 GN=Lactb PE=1 SV=1
17	280	P31399|ATP5H_RAT	251.7	55	55	22684000	28	28	44	Carbamidomethylation		ATP synthase subunit d, mitochondrial
7	15	P00507|AATM_RAT	246.46	44	44	48288000	44	42	78	Carbamidomethylation		Aspartate aminotransferase, mitochondrial
13	1940	A2VCW9|AASS_RAT	245.83	29	29	14591000	39	39	51	Oxidation (M)	102908	Alpha-aminoadipic semialdehyde synthase mitochondrial OS=Rattus norvegicus OX=10116 GN=Aass PE=2 SV=1
13	1939	tr|D4ACE9|D4ACE9_RAT	245.83	29	29	14591000	39	39	51	Oxidation (M)	103115	Alpha-aminoadipic semialdehyde synthase mitochondrial OS=Rattus norvegicus OX=10116 GN=Aass PE=1 SV=3
11	301	P35435|ATPG_RAT	245.24	42	42	32596000	32	32	63	Oxidation (M)	30191	ATP synthase subunit gamma mitochondrial OS=Rattus norvegicus OX=10116 GN=Atp5f1c PE=1 SV=2
11	297	tr|Q6QI09|Q6QI09_RAT	245.24	19	19	32596000	32	32	63	Oxidation (M)	67721	ATP synthase subunit gamma mitochondrial OS=Rattus norvegicus OX=10116 GN=Taf3 PE=1 SV=1
22	22	tr|D3ZFQ8|D3ZFQ8_RAT	238.43	38	38	18017000	24	24	37	Oxidation (M)	35435	Cytochrome c-1 OS=Rattus norvegicus OX=10116 GN=Cyc1 PE=1 SV=3
15	266	P04762|CATA_RAT	237.41	31	31	14437000	30	30	48	Oxidation (M)	59757	Catalase OS=Rattus norvegicus OX=10116 GN=Cat PE=1 SV=3
9	13	P32551|QCR2_RAT	235.06	30	30	30126000	36	36	67	Oxidation (M)	48396	Cytochrome b-c1 complex subunit 2 mitochondrial OS=Rattus norvegicus OX=10116 GN=Uqcrc2 PE=1 SV=2
8	33	Q64428|ECHA_RAT	233.95	29	29	19823000	47	46	76	Carbamidomethylation		Trifunctional enzyme subunit alpha, mitochondrial
26	14	P10860|DHE3_RAT	224.97	26	26	7032100	27	27	29	Oxidation (M)	61416	Glutamate dehydrogenase 1 mitochondrial OS=Rattus norvegicus OX=10116 GN=Glud1 PE=1 SV=2
16	76	tr|Q68G44|Q68G44_RAT	219.55	32	32	14649000	33	33	45	Formylation	56886	3-hydroxy-3-methylglutaryl coenzyme A synthase OS=Rattus norvegicus OX=10116 GN=Hmgcs2 PE=1 SV=1
12	169	Q60587|ECHB_RAT	215.35	28	28	15823000	32	31	55	Oxidation (M)	51414	Trifunctional enzyme subunit beta mitochondrial OS=Rattus norvegicus OX=10116 GN=Hadhb PE=1 SV=1
6	12	Q68FY0|QCR1_RAT	214.74	36	36	40636000	44	44	79	Carbamidomethylation		Cytochrome b-c1 complex subunit 1, mitochondrial
18	46	tr|L0L4L8|L0L4L8_RAT	210.67	30	30	3044900	30	3	43	Oxidation (M)
18	47	tr|A0A140GE10|A0A140GE10_RAT	210.67	29	29	3044900	30	3	43	Oxidation (M)
18	48	tr|A0A140GE11|A0A140GE11_RAT	210.67	29	29	3044900	30	3	43	Oxidation (M)
18	49	tr|A0A3Q8AGE8|A0A3Q8AGE8_RAT	210.67	29	29	3044900	30	3	43	Oxidation (M)
18	50	tr|A0A3Q8AC68|A0A3Q8AC68_RAT	210.67	29	29	3044900	30	3	43	Oxidation (M)
18	51	tr|A0A3S6FM15|A0A3S6FM15_RAT	210.67	29	29	3044900	30	3	43	Oxidation (M)
18	55	tr|D6NSR8|D6NSR8_RAT	210.67	29	29	3044900	30	3	43	Oxidation (M)
18	56	tr|A0A0A1FZ42|A0A0A1FZ42_RAT	210.67	29	29	3044900	30	3	43	Oxidation (M)
18	57	tr|D6NSS7|D6NSS7_RAT	210.67	29	29	3044900	30	3	43	Oxidation (M)
18	58	tr|Q8SEY9|Q8SEY9_RAT	210.67	29	29	3044900	30	3	43	Oxidation (M)
18	44	tr|D6NSR7|D6NSR7_RAT	210.67	29	29	3044900	30	3	43	Oxidation (M)
18	59	tr|A0A220DA44|A0A220DA44_RAT	210.67	29	29	3044900	30	3	43	Oxidation (M)
18	60	tr|D6NSQ0|D6NSQ0_RAT	210.67	29	29	3044900	30	3	43	Oxidation (M)
18	61	tr|Q5UAI7|Q5UAI7_RAT	210.67	29	29	3044900	30	3	43	Oxidation (M)
18	62	tr|Q8HIC4|Q8HIC4_RAT	210.67	29	29	3044900	30	3	43	Oxidation (M)
18	63	tr|A0A220DA02|A0A220DA02_RAT	210.67	29	29	3044900	30	3	43	Oxidation (M)
18	64	tr|A0A0S1Z1V4|A0A0S1Z1V4_RAT	210.67	29	29	3044900	30	3	43	Oxidation (M)
18	65	P00159|CYB_RAT	210.67	29	29	3044900	30	3	43	Oxidation (M)
18	67	tr|A0A220DA28|A0A220DA28_RAT	210.67	29	29	3044900	30	3	43	Oxidation (M)
18	68	tr|H2KXA0|H2KXA0_RAT	210.67	29	29	3044900	30	3	43	Oxidation (M)
18	99	tr|D6NSP2|D6NSP2_RAT	210.67	29	29	3044900	30	3	43	Oxidation (M)
20	117	tr|A0A385HC93|A0A385HC93_RAT	204.51	25	25	175100	28	1	38		42751	Cytochrome b (Fragment) OS=Rattus norvegicus OX=10116 PE=3 SV=1
14	268	P19511|AT5F1_RAT	196.15	28	28	25289000	24	24	50		28869	ATP synthase F(0) complex subunit B1 mitochondrial OS=Rattus norvegicus OX=10116 GN=Atp5pb PE=1 SV=1
35	179	P11240|COX5A_RAT	191.9	43	43	8241500	12	12	18		16130	Cytochrome c oxidase subunit 5A mitochondrial OS=Rattus norvegicus OX=10116 GN=Cox5a PE=1 SV=1
23	228	P16970|ABCD3_RAT	188.18	25	25	13029000	28	28	36		75316	ATP-binding cassette sub-family D member 3 OS=Rattus norvegicus OX=10116 GN=Abcd3 PE=1 SV=3
21	309	P63039|CH60_RAT	185.06	25	25	11244000	26	26	37	Oxidation (M)	60956	60 kDa heat shock protein mitochondrial OS=Rattus norvegicus OX=10116 GN=Hspd1 PE=1 SV=1
21	310	tr|A0A482IDN3|A0A482IDN3_RAT	185.06	25	25	11244000	26	26	37	Oxidation (M)	60956	Hsp60 OS=Rattus norvegicus OX=10116 GN=Hspd1 PE=2 SV=1
34	80	P20788|UCRI_RAT	181.6	32	32	8944100	12	12	19	Oxidation (M)	29446	Cytochrome b-c1 complex subunit Rieske mitochondrial OS=Rattus norvegicus OX=10116 GN=Uqcrfs1 PE=1 SV=2
19	1119	P14882|PCCA_RAT	180.39	22	22	7305400	28	25	39	Oxidation (M)	81623	Propionyl-CoA carboxylase alpha chain mitochondrial OS=Rattus norvegicus OX=10116 GN=Pcca PE=1 SV=3
25	466	tr|Q68FZ8|Q68FZ8_RAT	173.51	26	26	7077600	21	21	29	Carbamidomethylation		Propionyl coenzyme A carboxylase, beta polypeptide
28	41	tr|Q5UAJ6|Q5UAJ6_RAT	168.26	46	46	6199900	20	20	23	Oxidation (M)	25942	Cytochrome c oxidase subunit 2 OS=Rattus norvegicus OX=10116 GN=COX2 PE=3 SV=1
24	245	P18163|ACSL1_RAT	168.26	15	15	4513400	18	15	30		78179	Long-chain-fatty-acid--CoA ligase 1 OS=Rattus norvegicus OX=10116 GN=Acsl1 PE=1 SV=1
27	5938	Q06647|ATPO_RAT	161.06	43	43	8279500	20	20	29	Oxidation (M)	23398	ATP synthase subunit O mitochondrial OS=Rattus norvegicus OX=10116 GN=Atp5po PE=1 SV=1
43	261	P24329|THTR_RAT	159.16	14	14	2234500	7	7	10		33407	Thiosulfate sulfurtransferase OS=Rattus norvegicus OX=10116 GN=Tst PE=1 SV=3
32	5937	Q6PDU7|ATP5L_RAT	151.3	46	46	11750000	11	11	20	Oxidation (M)	11433	ATP synthase subunit g mitochondrial OS=Rattus norvegicus OX=10116 GN=Atp5mg PE=1 SV=2
33	100	P17764|THIL_RAT	150.99	21	21	5557100	14	14	19		44695	Acetyl-CoA acetyltransferase mitochondrial OS=Rattus norvegicus OX=10116 GN=Acat1 PE=1 SV=1
49	814	P45953|ACADV_RAT	149.84	5	5	926710	6	6	7		70749	Very long-chain specific acyl-CoA dehydrogenase mitochondrial OS=Rattus norvegicus OX=10116 GN=Acadvl PE=1 SV=1
49	815	tr|Q5M9H2|Q5M9H2_RAT	149.84	5	5	926710	6	6	7		70821	Acyl-Coenzyme A dehydrogenase very long chain OS=Rattus norvegicus OX=10116 GN=Acadvl PE=1 SV=1
38	6503	B3DMA2|ACD11_RAT	149.45	10	10	2528200	12	11	14	Oxidation (M)	87371	Acyl-CoA dehydrogenase family member 11 OS=Rattus norvegicus OX=10116 GN=Acad11 PE=1 SV=1
31	367	P0C2X9|AL4A1_RAT	148.38	24	24	6331700	18	17	20		61869	Delta-1-pyrroline-5-carboxylate dehydrogenase mitochondrial OS=Rattus norvegicus OX=10116 GN=Aldh4a1 PE=1 SV=1
37	184	tr|B2RYT5|B2RYT5_RAT	148.32	34	34	3690300	12	11	15		12651	Cox7a2l protein OS=Rattus norvegicus OX=10116 GN=Cox7a2l PE=2 SV=1
30	153	tr|Q06QA9|Q06QA9_RAT	147.02	20	20	5275500	15	15	20	Oxidation (M)	56893	Cytochrome c oxidase subunit 1 OS=Rattus norvegicus OX=10116 GN=CO1 PE=3 SV=1
30	154	tr|Q06QK0|Q06QK0_RAT	147.02	20	20	5275500	15	15	20	Oxidation (M)	56880	Cytochrome c oxidase subunit 1 OS=Rattus norvegicus OX=10116 GN=CO1 PE=3 SV=1
30	155	tr|Q8SEZ6|Q8SEZ6_RAT	147.02	20	20	5275500	15	15	20	Oxidation (M)	56879	Cytochrome c oxidase subunit 1 OS=Rattus norvegicus OX=10116 GN=COI PE=3 SV=1
30	156	tr|A0A0A1FZ34|A0A0A1FZ34_RAT	147.02	20	20	5275500	15	15	20	Oxidation (M)	56937	Cytochrome c oxidase subunit 1 OS=Rattus norvegicus OX=10116 GN=COX1 PE=3 SV=1
30	157	tr|Q8HIC9|Q8HIC9_RAT	147.02	20	20	5275500	15	15	20	Oxidation (M)	56845	Cytochrome c oxidase subunit 1 OS=Rattus norvegicus OX=10116 GN=Mt-co1 PE=3 SV=1
30	158	P05503|COX1_RAT	147.02	20	20	5275500	15	15	20	Oxidation (M)	56845	Cytochrome c oxidase subunit 1 OS=Rattus norvegicus OX=10116 GN=Mtco1 PE=2 SV=3
30	159	tr|Q95938|Q95938_RAT	147.02	20	20	5275500	15	15	20	Oxidation (M)	56977	Cytochrome c oxidase subunit 1 OS=Rattus norvegicus OX=10116 GN=Co I PE=3 SV=1
29	387	tr|G3V7Y3|G3V7Y3_RAT	146.37	30	30	7369600	12	12	21	Oxidation (M)	17563	ATP synthase subunit delta mitochondrial OS=Rattus norvegicus OX=10116 GN=Atp5f1d PE=1 SV=1
39	218	tr|M0RAM5|M0RAM5_RAT	144.66	25	25	3095600	11	11	14		22155	Glutathione peroxidase OS=Rattus norvegicus OX=10116 GN=Gpx1 PE=1 SV=1
39	219	P04041|GPX1_RAT	144.66	25	25	3095600	11	11	14		22305	Glutathione peroxidase 1 OS=Rattus norvegicus OX=10116 GN=Gpx1 PE=1 SV=4
36	176	P13086|SUCA_RAT	144.21	15	15	5361000	10	10	15		36148	Succinate--CoA ligase [ADP/GDP-forming] subunit alpha mitochondrial OS=Rattus norvegicus OX=10116 GN=Suclg1 PE=2 SV=2
36	177	tr|A0A0H2UHE1|A0A0H2UHE1_RAT	144.21	14	14	5361000	10	10	15		37560	Succinate--CoA ligase [ADP/GDP-forming] subunit alpha mitochondrial OS=Rattus norvegicus OX=10116 GN=Suclg1 PE=1 SV=1
48	332	Q9ER34|ACON_RAT	131.32	10	10	755580	7	7	7		85433	Aconitate hydratase mitochondrial OS=Rattus norvegicus OX=10116 GN=Aco2 PE=1 SV=2
42	244	P07824|ARGI1_RAT	128.38	18	18	1168900	8	7	10		34973	Arginase-1 OS=Rattus norvegicus OX=10116 GN=Arg1 PE=1 SV=2
41	380	O70351|HCD2_RAT	104.05	27	27	1948900	8	8	10		27246	3-hydroxyacyl-CoA dehydrogenase type-2 OS=Rattus norvegicus OX=10116 GN=Hsd17b10 PE=1 SV=3
41	381	tr|B0BMW2|B0BMW2_RAT	104.05	27	27	1948900	8	8	10		27250	3-hydroxyacyl-CoA dehydrogenase type-2 OS=Rattus norvegicus OX=10116 GN=Hsd17b10 PE=1 SV=1
45	1292	tr|G3V6I4|G3V6I4_RAT	102.71	8	8	829300	5	5	9		37791	Mitochondrial amidoxime reducing component 1 OS=Rattus norvegicus OX=10116 GN=Marc1 PE=1 SV=1
55	511	P32198|CPT1A_RAT	99.58	4	4	1098600	4	4	5		88126	Carnitine O-palmitoyltransferase 1 liver isoform OS=Rattus norvegicus OX=10116 GN=Cpt1a PE=1 SV=2
50	416	tr|Q5UAJ5|Q5UAJ5_RAT	98.81	30	30	5323700	4	4	7	Oxidation (M)	7642	ATP synthase protein 8 OS=Rattus norvegicus OX=10116 GN=ATP8 PE=3 SV=1
50	418	tr|Q8SEZ4|Q8SEZ4_RAT	98.81	30	30	5323700	4	4	7	Oxidation (M)	7632	ATP synthase protein 8 OS=Rattus norvegicus OX=10116 GN=ATPase8 PE=3 SV=1
53	267	tr|I6V4L9|I6V4L9_RAT	98.81	13	13	591860	6	6	6	Oxidation (M)	29844	Cytochrome c oxidase subunit 3 OS=Rattus norvegicus OX=10116 GN=COX3 PE=3 SV=1
54	273	tr|A0A0G2JVH4|A0A0G2JVH4_RAT	97.52	6	6	737500	5	5	5		86230	MICOS complex subunit MIC60 OS=Rattus norvegicus OX=10116 GN=Immt PE=1 SV=1
54	276	tr|A0A140TAG5|A0A140TAG5_RAT	97.52	8	8	737500	5	5	5		67049	MICOS complex subunit MIC60 OS=Rattus norvegicus OX=10116 GN=Immt PE=1 SV=1
54	277	Q3KR86|MIC60_RAT	97.52	8	8	737500	5	5	5		67177	MICOS complex subunit Mic60 (Fragment) OS=Rattus norvegicus OX=10116 GN=Immt PE=1 SV=1
65	29	P07895|SODM_RAT	94.27	14	14	420570	4	4	4		24674	Superoxide dismutase [Mn] mitochondrial OS=Rattus norvegicus OX=10116 GN=Sod2 PE=1 SV=2
40	5940	tr|Q8M7G5|Q8M7G5_RAT	89.22	23	23	1394900	7	7	13	Oxidation (M)	24240	ATP synthase subunit a (Fragment) OS=Rattus norvegicus OX=10116 PE=2 SV=1
40	5942	P05504|ATP6_RAT	89.22	23	23	1394900	7	7	13	Oxidation (M)	25076	ATP synthase subunit a OS=Rattus norvegicus OX=10116 GN=Mt-atp6 PE=1 SV=3
40	5943	tr|Q8HIC7|Q8HIC7_RAT	89.22	23	23	1394900	7	7	13	Oxidation (M)	25076	ATP synthase subunit a OS=Rattus norvegicus OX=10116 GN=Mt-atp6 PE=4 SV=1
40	5944	tr|S5S1E9|S5S1E9_RAT	89.22	23	23	1394900	7	7	13	Oxidation (M)	25049	ATP synthase subunit a OS=Rattus norvegicus OX=10116 GN=ATP6 PE=4 SV=1
40	5945	tr|Q06QE5|Q06QE5_RAT	89.22	23	23	1394900	7	7	13	Oxidation (M)	25075	ATP synthase subunit a OS=Rattus norvegicus OX=10116 GN=ATP6 PE=4 SV=1
51	5947	Q924S5|LONM_RAT	89.01	4	4	637780	5	5	6		105792	Lon protease homolog mitochondrial OS=Rattus norvegicus OX=10116 GN=Lonp1 PE=2 SV=1
89	1173	tr|A0A0G2JWI5|A0A0G2JWI5_RAT	87.9	3	3	342500	2	2	2		39453	Glycine N-acyltransferase OS=Rattus norvegicus OX=10116 GN=Glyat PE=1 SV=1
89	1171	Q5PQT3|GLYAT_RAT	87.9	4	4	342500	2	2	2		33899	Glycine N-acyltransferase OS=Rattus norvegicus OX=10116 GN=Glyat PE=2 SV=1
89	1172	tr|A4PB92|A4PB92_RAT	87.9	4	4	342500	2	2	2		33899	Glycine N-acyltransferase OS=Rattus norvegicus OX=10116 GN=Glyat PE=2 SV=1
89	1170	tr|B1H250|B1H250_RAT	87.9	4	4	342500	2	2	2		33986	Glycine-N-acyltransferase-like 1 OS=Rattus norvegicus OX=10116 GN=Glyatl1 PE=1 SV=1
100	6074	B1WC61|ACAD9_RAT	87.38	4	4	467030	2	2	2		68843	Complex I assembly factor ACAD9 mitochondrial OS=Rattus norvegicus OX=10116 GN=Acad9 PE=1 SV=1
56	231	tr|Q5M949|Q5M949_RAT	86.85	13	13	480290	5	5	5		28340	Nipsnap homolog 3A (C. elegans) OS=Rattus norvegicus OX=10116 GN=Nipsnap3b PE=1 SV=1
63	233	P29147|BDH_RAT	86.69	8	8	494440	3	3	4		38202	D-beta-hydroxybutyrate dehydrogenase mitochondrial OS=Rattus norvegicus OX=10116 GN=Bdh1 PE=1 SV=2
63	234	tr|A0A0G2JSH2|A0A0G2JSH2_RAT	86.69	8	8	494440	3	3	4		38333	3-hydroxybutyrate dehydrogenase type 1 isoform CRA_a OS=Rattus norvegicus OX=10116 GN=Bdh1 PE=1 SV=1
88	1610	A0A0G2K047|ACSS3_RAT	84.61	4	4	256460	2	2	2		74675	Acyl-CoA synthetase short-chain family member 3 mitochondrial OS=Rattus norvegicus OX=10116 GN=Acss3 PE=1 SV=1
58	182	P10888|COX41_RAT	84.37	20	20	1765300	4	4	5	Oxidation (M)	19515	Cytochrome c oxidase subunit 4 isoform 1 mitochondrial OS=Rattus norvegicus OX=10116 GN=Cox4i1 PE=1 SV=1
67	198	P85834|EFTU_RAT	78.37	8	8	255430	3	3	4		49522	Elongation factor Tu mitochondrial OS=Rattus norvegicus OX=10116 GN=Tufm PE=1 SV=1
71	348	P09139|SPYA_RAT	78.25	8	8	278740	3	3	3	Formylation	45834	Serine--pyruvate aminotransferase mitochondrial OS=Rattus norvegicus OX=10116 GN=Agxt PE=1 SV=1
61	264	P02770|ALBU_RAT	72.78	3	3	1070300	3	3	4	Formylation	68731	Serum albumin OS=Rattus norvegicus OX=10116 GN=Alb PE=1 SV=2
61	263	tr|A0A0G2JSH5|A0A0G2JSH5_RAT	72.78	3	3	1070300	3	3	4	Formylation	68759	Serum albumin OS=Rattus norvegicus OX=10116 GN=Alb PE=1 SV=1
68	279	Q5M9I5|QCR6_RAT	72.43	18	18	2932800	2	2	4		10424	Cytochrome b-c1 complex subunit 6 mitochondrial OS=Rattus norvegicus OX=10116 GN=Uqcrh PE=3 SV=1
44	324	P33124|ACSL6_RAT	67.62	3	3	138270	4	1	9	Formylation	78180	Long-chain-fatty-acid--CoA ligase 6 OS=Rattus norvegicus OX=10116 GN=Acsl6 PE=1 SV=1
78	2021	tr|G3V7I0|G3V7I0_RAT	66.8	14	14	1036000	3	3	3		28299	Peroxiredoxin 3 OS=Rattus norvegicus OX=10116 GN=Prdx3 PE=1 SV=1
78	2022	Q9Z0V6|PRDX3_RAT	66.8	14	14	1036000	3	3	3		28295	Thioredoxin-dependent peroxide reductase mitochondrial OS=Rattus norvegicus OX=10116 GN=Prdx3 PE=1 SV=2
102	183	tr|D4A7L4|D4A7L4_RAT	63.82	9	9	411830	1	1	2		17634	NADH dehydrogenase (Ubiquinone) 1 beta subcomplex 11 (Predicted) OS=Rattus norvegicus OX=10116 GN=Ndufb11 PE=1 SV=1
79	295	Q8VID1|DHRS4_RAT	63.57	13	13	351140	3	3	3		29822	Dehydrogenase/reductase SDR family member 4 OS=Rattus norvegicus OX=10116 GN=Dhrs4 PE=2 SV=2
47	427	tr|G3V9J8|G3V9J8_RAT	62.73	5	5	7166000	3	3	7	Formylation	87521	Glycerol-3-phosphate acyltransferase 1 mitochondrial OS=Rattus norvegicus OX=10116 GN=Gpam PE=1 SV=2
47	413	tr|A0A0G2K2U7|A0A0G2K2U7_RAT	62.73	4	4	7166000	3	3	7	Formylation	93728	Glycerol-3-phosphate acyltransferase 1 mitochondrial OS=Rattus norvegicus OX=10116 GN=Gpam PE=1 SV=1
47	414	P97564|GPAT1_RAT	62.73	4	4	7166000	3	3	7	Formylation	93715	Glycerol-3-phosphate acyltransferase 1 mitochondrial OS=Rattus norvegicus OX=10116 GN=Gpam PE=1 SV=3
92	36	tr|Q06QK5|Q06QK5_RAT	61.6	2	2	210480	2	2	2		68606	NADH-ubiquinone oxidoreductase chain 5 OS=Rattus norvegicus OX=10116 GN=ND5 PE=3 SV=1
92	37	P11661|NU5M_RAT	61.6	2	2	210480	2	2	2		68618	NADH-ubiquinone oxidoreductase chain 5 OS=Rattus norvegicus OX=10116 GN=Mtnd5 PE=3 SV=3
92	43	tr|Q06QG6|Q06QG6_RAT	61.6	2	2	210480	2	2	2		68588	NADH-ubiquinone oxidoreductase chain 5 OS=Rattus norvegicus OX=10116 GN=ND5 PE=3 SV=1
92	38	tr|Q06QA1|Q06QA1_RAT	61.6	2	2	210480	2	2	2		68574	NADH-ubiquinone oxidoreductase chain 5 OS=Rattus norvegicus OX=10116 GN=ND5 PE=3 SV=1
92	131	tr|A7XYD5|A7XYD5_RAT	61.6	2	2	210480	2	2	2		68856	NADH-ubiquinone oxidoreductase chain 5 OS=Rattus norvegicus OX=10116 GN=Nd5 PE=3 SV=1
92	39	tr|Q8SEZ0|Q8SEZ0_RAT	61.6	2	2	210480	2	2	2		68618	NADH-ubiquinone oxidoreductase chain 5 OS=Rattus norvegicus OX=10116 GN=Mt-nd5 PE=3 SV=1
92	40	tr|A0A096XKT9|A0A096XKT9_RAT	61.6	2	2	210480	2	2	2		68584	NADH-ubiquinone oxidoreductase chain 5 OS=Rattus norvegicus OX=10116 GN=ND5 PE=3 SV=1
92	132	tr|A7XYC1|A7XYC1_RAT	61.6	2	2	210480	2	2	2		68841	NADH-ubiquinone oxidoreductase chain 5 OS=Rattus norvegicus OX=10116 GN=Nd5 PE=3 SV=1
92	134	tr|A0A0A1FZN8|A0A0A1FZN8_RAT	61.6	2	2	210480	2	2	2		68970	NADH-ubiquinone oxidoreductase chain 5 OS=Rattus norvegicus OX=10116 GN=ND5 PE=3 SV=1
64	293	Q9WVK3|PECR_RAT	60.55	9	9	781330	3	3	4	Oxidation (M)	32433	Peroxisomal trans-2-enoyl-CoA reductase OS=Rattus norvegicus OX=10116 GN=Pecr PE=2 SV=1
64	294	tr|A0A0G2JVG4|A0A0G2JVG4_RAT	60.55	9	9	781330	3	3	4	Oxidation (M)	32737	Peroxisomal trans-2-enoyl-CoA reductase OS=Rattus norvegicus OX=10116 GN=Pecr PE=1 SV=1
46	220	P12075|COX5B_RAT	60.48	22	22	6511100	4	4	8		13915	Cytochrome c oxidase subunit 5B mitochondrial OS=Rattus norvegicus OX=10116 GN=Cox5b PE=1 SV=2
59	216	Q7TQ16|QCR8_RAT	59.61	29	29	856730	3	3	5		9849	Cytochrome b-c1 complex subunit 8 OS=Rattus norvegicus OX=10116 GN=Uqcrq PE=3 SV=1
66	12010	P04636|MDHM_RAT	55.36	5	5	317330	3	3	4		35684	Malate dehydrogenase mitochondrial OS=Rattus norvegicus OX=10116 GN=Mdh2 PE=1 SV=2
72	399	Q91XJ1|BECN1_RAT	54.76	3	3		3	0	3		51557	Beclin-1 OS=Rattus norvegicus OX=10116 GN=Becn1 PE=1 SV=1
91	26	Q641Y2|NDUS2_RAT	53.33	4	4	330720	2	2	2		52562	NADH dehydrogenase [ubiquinone] iron-sulfur protein 2 mitochondrial OS=Rattus norvegicus OX=10116 GN=Ndufs2 PE=1 SV=1
191	110	tr|A0A0G2JVL6|A0A0G2JVL6_RAT	50.08	7	7	139970	1	1	1		19965	NADH dehydrogenase [ubiquinone] 1 alpha subcomplex subunit 8 OS=Rattus norvegicus OX=10116 GN=Ndufa8 PE=1 SV=1
76	705	Q64565|AGT2_RAT	49.15	3	3	50275	2	2	3		57201	Alanine--glyoxylate aminotransferase 2 mitochondrial OS=Rattus norvegicus OX=10116 GN=Agxt2 PE=1 SV=2
213	246	tr|Q5PQZ9|Q5PQZ9_RAT	48.34	11	11	50562	1	1	1		14359	NADH dehydrogenase [ubiquinone] 1 subunit C2 OS=Rattus norvegicus OX=10116 GN=Ndufc2 PE=1 SV=1
111	11922	Q9JJW3|ATPMD_RAT	47.66	21	21	695420	1	1	2		6408	ATP synthase membrane subunit DAPIT mitochondrial OS=Rattus norvegicus OX=10116 GN=Atp5md PE=1 SV=1
80	162	tr|Q5EBA4|Q5EBA4_RAT	47.18	7	7	543330	2	2	3		33215	Nipsnap1 protein (Fragment) OS=Rattus norvegicus OX=10116 GN=Nipsnap1 PE=2 SV=1
80	163	tr|G3V728|G3V728_RAT	47.18	7	7	543330	2	2	3		33346	4-nitrophenylphosphatase domain and non-neuronal SNAP25-like protein homolog 1 (C. elegans) isoform CRA_b OS=Rattus norvegicus OX=10116 GN=Nipsnap1 PE=1 SV=1
90	1422	tr|F1LPV8|F1LPV8_RAT	45.45	4	4	0	2	2	2		46639	Succinate--CoA ligase [GDP-forming] subunit beta mitochondrial OS=Rattus norvegicus OX=10116 GN=Suclg2 PE=1 SV=2
90	1423	tr|B1H270|B1H270_RAT	45.45	4	4	0	2	2	2		46988	Succinate--CoA ligase [GDP-forming] subunit beta mitochondrial OS=Rattus norvegicus OX=10116 GN=Suclg2 PE=2 SV=1
214	11	P67779|PHB_RAT	44.94	6	6	134890	1	1	1		29820	Prohibitin OS=Rattus norvegicus OX=10116 GN=Phb PE=1 SV=1
215	354	tr|Q3B8N9|Q3B8N9_RAT	44.05	3	3	310060	1	1	1		32823	Biphenyl hydrolase-like OS=Rattus norvegicus OX=10116 GN=Bphl PE=1 SV=1
52	888	O70600|RSAD2_RAT	42.63	6	6	1452000	2	2	6	Formylation	41255	Radical S-adenosyl methionine domain-containing protein 2 OS=Rattus norvegicus OX=10116 GN=Rsad2 PE=1 SV=1
52	889	tr|A0A0H2UHF4|A0A0H2UHF4_RAT	42.63	6	6	1452000	2	2	6	Formylation	41444	RCG62278 OS=Rattus norvegicus OX=10116 GN=Rsad2 PE=4 SV=1
187	17822	P05182|CP2E1_RAT	40.67	3	3	0	1	1	1		56627	Cytochrome P450 2E1 OS=Rattus norvegicus OX=10116 GN=Cyp2e1 PE=1 SV=4
144	6630	tr|F1LZW6|F1LZW6_RAT	39.94	2	2	47079	1	1	1		54099	Solute carrier family 25 member 13 OS=Rattus norvegicus OX=10116 GN=Slc25a13 PE=1 SV=2
144	11913	tr|F1LX07|F1LX07_RAT	39.94	2	2	47079	1	1	1		71917	Solute carrier family 25 member 12 OS=Rattus norvegicus OX=10116 GN=Slc25a12 PE=1 SV=3
144	11912	tr|A0A0G2K2J7|A0A0G2K2J7_RAT	39.94	3	3	47079	1	1	1		41504	Solute carrier family 25 member 12 OS=Rattus norvegicus OX=10116 GN=Slc25a12 PE=1 SV=1
57	230	tr|B2RYS2|B2RYS2_RAT	39.92	26	26	600140	4	3	5		13559	Cytochrome b-c1 complex subunit 7 OS=Rattus norvegicus OX=10116 GN=Uqcrb PE=1 SV=1
110	854	tr|D3Z900|D3Z900_RAT	38.67	7	7	78996	2	2	2	Oxidation (M)	38239	Mitochondrial amidoxime reducing component 2 OS=Rattus norvegicus OX=10116 GN=Marc2 PE=1 SV=2
110	855	O88994|MARC2_RAT	38.67	7	7	78996	2	2	2	Oxidation (M)	38249	Mitochondrial amidoxime reducing component 2 OS=Rattus norvegicus OX=10116 GN=Marc2 PE=2 SV=1
93	326	P05696|KPCA_RAT	38.24	1	1	288850	1	1	2		76792	Protein kinase C alpha type OS=Rattus norvegicus OX=10116 GN=Prkca PE=1 SV=3
188	165	tr|D4A565|D4A565_RAT	36.59	7	7	0	1	1	1		21664	NADH dehydrogenase (Ubiquinone) 1 beta subcomplex 5 (Predicted) isoform CRA_b OS=Rattus norvegicus OX=10116 GN=Ndufb5 PE=1 SV=1
186	283	P80431|COX7B_RAT	36.17	15	15	121950	1	1	1		8995	Cytochrome c oxidase subunit 7B mitochondrial OS=Rattus norvegicus OX=10116 GN=Cox7b PE=1 SV=3
152	42	tr|D4A0T0|D4A0T0_RAT	35.81	10	10	142200	1	1	1		20859	NADH:ubiquinone oxidoreductase subunit B10 OS=Rattus norvegicus OX=10116 GN=Ndufb10 PE=1 SV=1
153	624	tr|Q2TVU3|Q2TVU3_RAT	35.46	3	3	97366	1	1	1		49412	TID1 OS=Rattus norvegicus OX=10116 GN=Dnaja3 PE=2 SV=1
153	625	tr|A0A0G2K4Y1|A0A0G2K4Y1_RAT	35.46	3	3	97366	1	1	1		49416	DnaJ heat shock protein family (Hsp40) member A3 OS=Rattus norvegicus OX=10116 GN=Dnaja3 PE=1 SV=1
153	626	tr|Q2UZS7|Q2UZS7_RAT	35.46	2	2	97366	1	1	1		52399	Tid-1 long isoform OS=Rattus norvegicus OX=10116 GN=Dnaja3 PE=2 SV=1
153	627	tr|A0A0G2K5E4|A0A0G2K5E4_RAT	35.46	2	2	97366	1	1	1		52403	DnaJ heat shock protein family (Hsp40) member A3 OS=Rattus norvegicus OX=10116 GN=Dnaja3 PE=1 SV=1
153	623	tr|G3V6I5|G3V6I5_RAT	35.46	3	3	97366	1	1	1		46777	DnaJ heat shock protein family (Hsp40) member A3 OS=Rattus norvegicus OX=10116 GN=Dnaja3 PE=1 SV=2
69	753	P08011|MGST1_RAT	35.1	8	8	291120	2	2	4		17472	Microsomal glutathione S-transferase 1 OS=Rattus norvegicus OX=10116 GN=Mgst1 PE=1 SV=3
69	754	tr|B6DYQ4|B6DYQ4_RAT	35.1	8	8	291120	2	2	4		17472	Microsomal glutathione S-transferase OS=Rattus norvegicus OX=10116 GN=Mgst1 PE=2 SV=1
83	11914	P29419|ATP5I_RAT	35.06	13	13	451260	1	1	3		8255	ATP synthase subunit e mitochondrial OS=Rattus norvegicus OX=10116 GN=Atp5me PE=1 SV=3
216	12296	tr|G3V734|G3V734_RAT	34.07	3	3	0	1	1	1		36133	2 4-dienoyl CoA reductase 1 mitochondrial isoform CRA_a OS=Rattus norvegicus OX=10116 GN=Decr1 PE=1 SV=1
216	12297	Q64591|DECR_RAT	34.07	3	3	0	1	1	1		36133	2 4-dienoyl-CoA reductase mitochondrial OS=Rattus norvegicus OX=10116 GN=Decr1 PE=1 SV=2
166	373	Q4KLP0|DHTK1_RAT	31.97	1	1	775740	1	1	1		102642	Probable 2-oxoglutarate dehydrogenase E1 component DHKTD1 mitochondrial OS=Rattus norvegicus OX=10116 GN=Dhtkd1 PE=2 SV=1
217	1796	P22071|3BHS1_RAT	30.95	3	3	49666	1	1	1		42037	3 beta-hydroxysteroid dehydrogenase/Delta 5-->4-isomerase type 1 OS=Rattus norvegicus OX=10116 GN=Hsd3b1 PE=1 SV=3
217	1797	P22072|3BHS2_RAT	30.95	3	3	49666	1	1	1		42277	3 beta-hydroxysteroid dehydrogenase/Delta 5-->4-isomerase type 2 OS=Rattus norvegicus OX=10116 GN=Hsd3b PE=2 SV=3
217	28053	P27364|3BHS5_RAT	30.95	3	3	49666	1	1	1		42206	NADPH-dependent 3-keto-steroid reductase Hsd3b5 OS=Rattus norvegicus OX=10116 GN=Hsd3b5 PE=1 SV=3
189	368	tr|A0A0G2JWK2|A0A0G2JWK2_RAT	29.45	1	1	0	1	1	1		53049	Methyl-CpG-binding protein 2 OS=Rattus norvegicus OX=10116 GN=Mecp2 PE=1 SV=1
189	369	Q00566|MECP2_RAT	29.45	1	1	0	1	1	1		53048	Methyl-CpG-binding protein 2 OS=Rattus norvegicus OX=10116 GN=Mecp2 PE=1 SV=1
74	595	D4A929|WDR81_RAT	29.42	1	1	1088100	2	2	3	Carbamidomethylation		WD repeat-containing protein 81
219	11916	Q5I0C5|FMT_RAT	29.18	2	2	427900	1	1	1	Formylation	42997	Methionyl-tRNA formyltransferase mitochondrial OS=Rattus norvegicus OX=10116 GN=Mtfmt PE=2 SV=1
109	406	tr|D3ZD23|D3ZD23_RAT	2020-11-29	1	1	921110	2	2	2		67300	ATP-binding cassette subfamily E member 1 OS=Rattus norvegicus OX=10116 GN=Abce1 PE=1 SV=1
113	23328	tr|Q5BK11|Q5BK11_RAT	2020-03-29	5	5	91686	2	1	2		34506	Signal transducing adaptor family member 1 OS=Rattus norvegicus OX=10116 GN=Stap1 PE=2 SV=1
218	23266	P0CG51|UBB_RAT	2020-01-29	4	4	94730	1	1	1		34369	Polyubiquitin-B OS=Rattus norvegicus OX=10116 GN=Ubb PE=1 SV=1
220	24	tr|D3ZG43|D3ZG43_RAT	28.86	3	3	382160	1	1	1		30226	NADH dehydrogenase (Ubiquinone) Fe-S protein 3 (Predicted) isoform CRA_c OS=Rattus norvegicus OX=10116 GN=Ndufs3 PE=1 SV=1
103	338	tr|A0A0G2JYU2|A0A0G2JYU2_RAT	28.57	4	4	845130	1	1	2		20750	Mitochondrial ribosomal protein L11 OS=Rattus norvegicus OX=10116 GN=mrpl11 PE=1 SV=1
103	339	Q5XIE3|RM11_RAT	28.57	4	4	845130	1	1	2		22420	39S ribosomal protein L11 mitochondrial OS=Rattus norvegicus OX=10116 GN=Mrpl11 PE=2 SV=1
116	763	O35303|DNM1L_RAT	28.37	2	2	94841	2	1	2		83908	Dynamin-1-like protein OS=Rattus norvegicus OX=10116 GN=Dnm1l PE=1 SV=1
77	347	P80433|COX8A_RAT	26.49	14	14	403220	1	1	3		7672	Cytochrome c oxidase subunit 8A mitochondrial OS=Rattus norvegicus OX=10116 GN=Cox8a PE=1 SV=3
222	325	P11951|CX6C2_RAT	26.16	11	11	74147	1	1	1		8455	Cytochrome c oxidase subunit 6C-2 OS=Rattus norvegicus OX=10116 GN=Cox6c2 PE=1 SV=3
60	317	tr|A0A0G2JYD4|A0A0G2JYD4_RAT	25.97	0	0	1098900	2	2	4	Formylation	487857	Vacuolar protein sorting 13 homolog D OS=Rattus norvegicus OX=10116 GN=Vps13d PE=1 SV=1
60	318	tr|D3ZKC6|D3ZKC6_RAT	25.97	0	0	1098900	2	2	4	Formylation	488962	Vacuolar protein sorting 13 homolog D OS=Rattus norvegicus OX=10116 GN=Vps13d PE=1 SV=1
190	250	tr|Q06Q97|Q06Q97_RAT	25.15	4	4	15628	1	1	1		38485	NADH-ubiquinone oxidoreductase chain 2 OS=Rattus norvegicus OX=10116 GN=ND2 PE=3 SV=1
190	251	tr|A0A0A1G491|A0A0A1G491_RAT	25.15	4	4	15628	1	1	1		38542	NADH-ubiquinone oxidoreductase chain 2 OS=Rattus norvegicus OX=10116 GN=ND2 PE=3 SV=1
190	252	tr|Q5UAJ8|Q5UAJ8_RAT	25.15	4	4	15628	1	1	1		38455	NADH-ubiquinone oxidoreductase chain 2 OS=Rattus norvegicus OX=10116 GN=ND2 PE=3 SV=1
190	265	tr|S5RF74|S5RF74_RAT	25.15	4	4	15628	1	1	1		38641	NADH-ubiquinone oxidoreductase chain 2 OS=Rattus norvegicus OX=10116 GN=ND2 PE=3 SV=1
190	253	tr|Q8HID0|Q8HID0_RAT	25.15	4	4	15628	1	1	1		38653	NADH-ubiquinone oxidoreductase chain 2 OS=Rattus norvegicus OX=10116 GN=Mt-nd2 PE=3 SV=1
190	254	P11662|NU2M_RAT	25.15	4	4	15628	1	1	1		38653	NADH-ubiquinone oxidoreductase chain 2 OS=Rattus norvegicus OX=10116 GN=Mtnd2 PE=3 SV=3
190	255	tr|Q06QH5|Q06QH5_RAT	25.15	4	4	15628	1	1	1		38626	NADH-ubiquinone oxidoreductase chain 2 OS=Rattus norvegicus OX=10116 GN=ND2 PE=3 SV=1
190	256	tr|Q06QB0|Q06QB0_RAT	25.15	4	4	15628	1	1	1		38534	NADH-ubiquinone oxidoreductase chain 2 OS=Rattus norvegicus OX=10116 GN=ND2 PE=3 SV=1
190	257	tr|D2E6P4|D2E6P4_RAT	25.15	4	4	15628	1	1	1		38623	NADH-ubiquinone oxidoreductase chain 2 OS=Rattus norvegicus OX=10116 GN=ND2 PE=3 SV=1
190	249	tr|Q06QE9|Q06QE9_RAT	25.15	4	4	15628	1	1	1		38598	NADH-ubiquinone oxidoreductase chain 2 OS=Rattus norvegicus OX=10116 GN=ND2 PE=3 SV=1
190	258	tr|Q8SEZ7|Q8SEZ7_RAT	25.15	4	4	15628	1	1	1		38580	NADH-ubiquinone oxidoreductase chain 2 (Fragment) OS=Rattus norvegicus OX=10116 GN=NADH2 PE=3 SV=1
223	164	tr|D3ZF13|D3ZF13_RAT	24.89	9	9	31122	1	1	1		17514	Acyl carrier protein OS=Rattus norvegicus OX=10116 GN=Ndufab1 PE=1 SV=1
97	1838	O35132|CP27B_RAT	24.16	2	2		2	0	2		55369	25-hydroxyvitamin D-1 alpha hydroxylase mitochondrial OS=Rattus norvegicus OX=10116 GN=Cyp27b1 PE=2 SV=2
97	1839	tr|M0R3V1|M0R3V1_RAT	24.16	2	2		2	0	2		55368	25-hydroxyvitamin D-1 alpha hydroxylase mitochondrial OS=Rattus norvegicus OX=10116 GN=Cyp27b1 PE=3 SV=1
94	1055	tr|D3ZTP0|D3ZTP0_RAT	23.43	1	1	114220	1	1	2		101806	10-formyltetrahydrofolate dehydrogenase OS=Rattus norvegicus OX=10116 GN=Aldh1l2 PE=1 SV=3
225	11911	P21571|ATP5J_RAT	23.22	9	9	148580	1	1	1		12494	ATP synthase-coupling factor 6 mitochondrial OS=Rattus norvegicus OX=10116 GN=Atp5pf PE=1 SV=1
165	11963	tr|Q5BJZ3|Q5BJZ3_RAT	23.18	1	1	0	1	1	1		113869	Nicotinamide nucleotide transhydrogenase OS=Rattus norvegicus OX=10116 GN=Nnt PE=1 SV=1
112	382	Q01062|PDE2A_RAT	23.13	2	2	794140	1	1	2		104664	cGMP-dependent 3' 5'-cyclic phosphodiesterase OS=Rattus norvegicus OX=10116 GN=Pde2a PE=1 SV=2
112	383	tr|F8WFW5|F8WFW5_RAT	23.13	1	1	794140	1	1	2		105234	Phosphodiesterase OS=Rattus norvegicus OX=10116 GN=Pde2a PE=1 SV=1
227	6383	tr|B2RZD6|B2RZD6_RAT	22.89	10	10	127470	1	1	1		9327	NDUFA4 mitochondrial complex-associated OS=Rattus norvegicus OX=10116 GN=Ndufa4 PE=1 SV=1
122	456	tr|A0A0G2K5L6|A0A0G2K5L6_RAT	22.26	0	0	699090	1	1	1		275755	Acetyl-CoA carboxylase beta OS=Rattus norvegicus OX=10116 GN=Acacb PE=1 SV=1
122	457	tr|A0A0G2K1F2|A0A0G2K1F2_RAT	22.26	0	0	699090	1	1	1		276393	Acetyl-CoA carboxylase beta OS=Rattus norvegicus OX=10116 GN=Acacb PE=1 SV=1
122	459	tr|D3ZBE2|D3ZBE2_RAT	22.26	0	0	699090	1	1	1		275967	Acetyl-CoA carboxylase beta OS=Rattus norvegicus OX=10116 GN=Acacb PE=1 SV=3
122	460	tr|E9PSQ0|E9PSQ0_RAT	22.26	0	0	699090	1	1	1		276255	Acetyl-CoA carboxylase beta OS=Rattus norvegicus OX=10116 GN=Acacb PE=1 SV=2
122	458	tr|O70151|O70151_RAT	22.26	0	0	699090	1	1	1		276097	Acetyl-CoA carboxylase OS=Rattus norvegicus OX=10116 GN=Acacb PE=2 SV=1
122	545	P11497|ACACA_RAT	22.26	0	0	699090	1	1	1		265191	Acetyl-CoA carboxylase 1 OS=Rattus norvegicus OX=10116 GN=Acaca PE=1 SV=1
229	374	P48037|ANXA6_RAT	22.2	1	1	410470	1	1	1		75754	Annexin A6 OS=Rattus norvegicus OX=10116 GN=Anxa6 PE=1 SV=2
229	375	tr|Q6IMZ3|Q6IMZ3_RAT	22.2	1	1	410470	1	1	1		75756	Annexin OS=Rattus norvegicus OX=10116 GN=Anxa6 PE=1 SV=1
230	1810	tr|D3ZD73|D3ZD73_RAT	2020-03-22	2	2	152190	1	1	1		54245	DEAD-box helicase 6 OS=Rattus norvegicus OX=10116 GN=Ddx6 PE=1 SV=1
193	135	tr|B0BNE6|B0BNE6_RAT	21.98	6	6	0	1	1	1		23970	NADH dehydrogenase (Ubiquinone) Fe-S protein 8 (Predicted) isoform CRA_a OS=Rattus norvegicus OX=10116 GN=Ndufs8 PE=1 SV=1
164	17950	Q5I0L3|SYYM_RAT	21.94	2	2	549900	1	1	1	Oxidation (M)		Tyrosine--tRNA ligase, mitochondrial
231	25	tr|A0A0G2KB63|A0A0G2KB63_RAT	21.84	4	4	117160	1	1	1		33168	Prohibitin OS=Rattus norvegicus OX=10116 GN=Phb2 PE=1 SV=1
231	19	Q5XIH7|PHB2_RAT	21.84	4	4	117160	1	1	1		33312	Prohibitin-2 OS=Rattus norvegicus OX=10116 GN=Phb2 PE=1 SV=1
107	1261	tr|Q5RKL4|Q5RKL4_RAT	21.83	1	1	0	1	1	2		95977	Dimethylglycine dehydrogenase OS=Rattus norvegicus OX=10116 GN=Dmgdh PE=1 SV=1
107	1262	Q63342|M2GD_RAT	21.83	1	1	0	1	1	2		96047	Dimethylglycine dehydrogenase mitochondrial OS=Rattus norvegicus OX=10116 GN=Dmgdh PE=1 SV=1
107	1268	tr|A0A0G2K9Y2|A0A0G2K9Y2_RAT	21.83	1	1	0	1	1	2		98864	Dimethylglycine dehydrogenase mitochondrial OS=Rattus norvegicus OX=10116 GN=Dmgdh PE=1 SV=1
155	6035	Q68FU7|COQ6_RAT	21.68	3	3	0	1	1	1		51496	Ubiquinone biosynthesis monooxygenase COQ6 mitochondrial OS=Rattus norvegicus OX=10116 GN=Coq6 PE=2 SV=1
131	816	tr|Q5U2T0|Q5U2T0_RAT	21.68	3	3	0	1	1	1		44494	Death associated protein 3 OS=Rattus norvegicus OX=10116 GN=Dap3 PE=2 SV=1
131	817	tr|F7EZZ0|F7EZZ0_RAT	21.68	3	3	0	1	1	1		45112	Death-associated protein 3 OS=Rattus norvegicus OX=10116 GN=Dap3 PE=1 SV=1
131	1036	tr|A0A0G2K264|A0A0G2K264_RAT	21.68	2	2	0	1	1	1		46666	Death-associated protein 3 OS=Rattus norvegicus OX=10116 GN=Dap3 PE=1 SV=1
232	11926	D3ZAF6|ATPK_RAT	21.21	10	10	0	1	1	1		10452	ATP synthase subunit f mitochondrial OS=Rattus norvegicus OX=10116 GN=Atp5mf PE=1 SV=1
128	441	P11530|DMD_RAT	2020-01-21	0	0	297210	1	1	1		425830	Dystrophin OS=Rattus norvegicus OX=10116 GN=Dmd PE=1 SV=2
128	592	tr|B0BN02|B0BN02_RAT	2020-01-21	1	1	297210	1	1	1		48444	Metaxin OS=Rattus norvegicus OX=10116 GN=Mtx1 PE=1 SV=1
233	11970	P24473|GSTK1_RAT	20.94	4	4	104830	1	1	1		25493	Glutathione S-transferase kappa 1 OS=Rattus norvegicus OX=10116 GN=Gstk1 PE=1 SV=3
233	11971	tr|B6DYQ0|B6DYQ0_RAT	20.94	4	4	104830	1	1	1		25493	Glutathione S-transferase kappa OS=Rattus norvegicus OX=10116 GN=Gstk1 PE=2 SV=1

## Sheet: RLM SM-BM PTP I-III(2)-IV(H)
Protein Group	Protein ID	Accession	-10lgP	Coverage (%)	Coverage (%) Sample 1	IBAQ	#Peptides	#Unique	#Spec Sample 1	PTM	Avg. Mass	Description
1	1	P10860|DHE3_RAT	395.27	67	67	561990000	242	238	526	Carbamidomethylation		Glutamate dehydrogenase 1, mitochondrial
3	2	tr|B2GV15|B2GV15_RAT	278	49	49	62867000	69	68	123	Oxidation (M)	53274	Dihydrolipoamide acetyltransferase component of pyruvate dehydrogenase complex OS=Rattus norvegicus OX=10116 GN=Dbt PE=1 SV=1
2	4	P07756|CPSM_RAT	272.24	31	31	53229000	94	94	127	Oxidation (M)	164579	Carbamoyl-phosphate synthase [ammonia] mitochondrial OS=Rattus norvegicus OX=10116 GN=Cps1 PE=1 SV=1
7	5	tr|G3V6P2|G3V6P2_RAT	252.3	43	43	28646000	43	43	63	Oxidation (M)		Dihydrolipoyllysine-residue succinyltransferase component of 2-oxoglutarate dehydrogenase complex, mitochondrial
7	6	Q01205|ODO2_RAT	252.3	43	43	28646000	43	43	63	Oxidation (M)
11	8	P10719|ATPB_RAT	248.73	28	28	24979000	31	31	56	Oxidation (M)	56354	ATP synthase subunit beta mitochondrial OS=Rattus norvegicus OX=10116 GN=Atp5f1b PE=1 SV=2
11	9	tr|G3V6D3|G3V6D3_RAT	248.73	28	28	24979000	31	31	56	Oxidation (M)	56345	ATP synthase subunit beta OS=Rattus norvegicus OX=10116 GN=Atp5f1b PE=1 SV=1
6	3	P85834|EFTU_RAT	241.69	41	41	23825000	44	44	65	Carbamidomethylation		Elongation factor Tu, mitochondrial
10	13	Q66HF1|NDUS1_RAT	223.38	24	24	19383000	39	39	57	Carbamidomethylation	79412	NADH-ubiquinone oxidoreductase 75 kDa subunit mitochondrial OS=Rattus norvegicus OX=10116 GN=Ndufs1 PE=1 SV=1
8	20	P19234|NDUV2_RAT	223.05	39	39	26877000	30	30	62	Formylation	27378	NADH dehydrogenase [ubiquinone] flavoprotein 2 mitochondrial OS=Rattus norvegicus OX=10116 GN=Ndufv2 PE=1 SV=2
9	16	Q68FY0|QCR1_RAT	222.01	35	35	25401000	39	39	61	Carbamidomethylation	52849	Cytochrome b-c1 complex subunit 1 mitochondrial OS=Rattus norvegicus OX=10116 GN=Uqcrc1 PE=1 SV=1
14	15	P67779|PHB_RAT	221.53	49	49	22688000	31	31	49		29820	Prohibitin OS=Rattus norvegicus OX=10116 GN=Phb PE=1 SV=1
20	38	tr|D3ZFQ8|D3ZFQ8_RAT	219.54	26	26	14040000	19	19	29	Oxidation (M)	35435	Cytochrome c-1 OS=Rattus norvegicus OX=10116 GN=Cyc1 PE=1 SV=3
5	21	P32551|QCR2_RAT	214.75	30	30	26880000	36	36	67		48396	Cytochrome b-c1 complex subunit 2 mitochondrial OS=Rattus norvegicus OX=10116 GN=Uqcrc2 PE=1 SV=2
17	26	P00507|AATM_RAT	214.72	26	26	16879000	31	31	40	Oxidation (M)	47314	Aspartate aminotransferase mitochondrial OS=Rattus norvegicus OX=10116 GN=Got2 PE=1 SV=2
19	32	P07895|SODM_RAT	213.38	41	41	11314000	18	18	32		24674	Superoxide dismutase [Mn] mitochondrial OS=Rattus norvegicus OX=10116 GN=Sod2 PE=1 SV=2
16	14	tr|F1LN92|F1LN92_RAT	212.72	26	26	9010100	34	23	43	Oxidation (M)	89352	AFG3-like matrix AAA peptidase subunit 2 OS=Rattus norvegicus OX=10116 GN=Afg3l2 PE=1 SV=1
4	10	P15999|ATPA_RAT	211.86	29	29	27082000	38	37	94	Oxidation (M)	59754	ATP synthase subunit alpha mitochondrial OS=Rattus norvegicus OX=10116 GN=Atp5f1a PE=1 SV=2
4	11	tr|F1LP05|F1LP05_RAT	211.86	29	29	27082000	38	37	94	Oxidation (M)	59813	ATP synthase subunit alpha OS=Rattus norvegicus OX=10116 GN=Atp5f1a PE=1 SV=1
12	7	Q5BK63|NDUA9_RAT	209.89	36	36	9295900	32	31	54	Oxidation (M)	42559	NADH dehydrogenase [ubiquinone] 1 alpha subcomplex subunit 9 mitochondrial OS=Rattus norvegicus OX=10116 GN=Ndufa9 PE=1 SV=2
15	12	Q5XIH7|PHB2_RAT	205.46	39	39	15987000	32	32	49	Oxidation (M)	33312	Prohibitin-2 OS=Rattus norvegicus OX=10116 GN=Phb2 PE=1 SV=1
13	18	Q4FZT0|STML2_RAT	200.69	37	37	16177000	38	38	51	Oxidation (M)	38414	Stomatin-like protein 2 mitochondrial OS=Rattus norvegicus OX=10116 GN=Stoml2 PE=1 SV=1
18	19	Q641Y2|NDUS2_RAT	192.95	29	29	11865000	27	27	36	Oxidation (M)	52562	NADH dehydrogenase [ubiquinone] iron-sulfur protein 2 mitochondrial OS=Rattus norvegicus OX=10116 GN=Ndufs2 PE=1 SV=1
33	49	tr|B2RYS8|B2RYS8_RAT	190.59	26	26	4300100	10	10	15	Oxidation (M)	21959	NADH dehydrogenase [ubiquinone] 1 beta subcomplex subunit 8 mitochondrial OS=Rattus norvegicus OX=10116 GN=Ndufb8 PE=1 SV=1
24	48	tr|D3ZF13|D3ZF13_RAT	185.4	30	30	6647800	16	15	25	Oxidation (M)	17514	Acyl carrier protein OS=Rattus norvegicus OX=10116 GN=Ndufab1 PE=1 SV=1
26	42	P20788|UCRI_RAT	177.16	24	24	9410700	12	12	22	Oxidation (M)	29446	Cytochrome b-c1 complex subunit Rieske mitochondrial OS=Rattus norvegicus OX=10116 GN=Uqcrfs1 PE=1 SV=2
21	22	tr|Q68G44|Q68G44_RAT	174.89	26	26	6338900	24	24	28		56886	3-hydroxy-3-methylglutaryl coenzyme A synthase OS=Rattus norvegicus OX=10116 GN=Hmgcs2 PE=1 SV=1
21	23	P22791|HMCS2_RAT	174.89	26	26	6338900	24	24	28		56912	Hydroxymethylglutaryl-CoA synthase mitochondrial OS=Rattus norvegicus OX=10116 GN=Hmgcs2 PE=1 SV=1
28	34	tr|A0A0G2JVL6|A0A0G2JVL6_RAT	174.86	38	38	3849000	14	14	21	Carbamidomethylation	19965	NADH dehydrogenase [ubiquinone] 1 alpha subcomplex subunit 8 OS=Rattus norvegicus OX=10116 GN=Ndufa8 PE=1 SV=1
27	24	Q64428|ECHA_RAT	173.49	16	16	6058100	17	17	21	Oxidation (M)	82665	Trifunctional enzyme subunit alpha mitochondrial OS=Rattus norvegicus OX=10116 GN=Hadha PE=1 SV=2
37	44	P11240|COX5A_RAT	170.12	40	40	4841800	10	10	13		16130	Cytochrome c oxidase subunit 5A mitochondrial OS=Rattus norvegicus OX=10116 GN=Cox5a PE=1 SV=1
43	136	P24329|THTR_RAT	167.7	16	16	2415800	8	8	10		33407	Thiosulfate sulfurtransferase OS=Rattus norvegicus OX=10116 GN=Tst PE=1 SV=3
23	30	P52873|PYC_RAT	157.16	14	14	3908100	20	20	25		129777	Pyruvate carboxylase mitochondrial OS=Rattus norvegicus OX=10116 GN=Pc PE=1 SV=2
23	31	tr|A0A0G2JTL5|A0A0G2JTL5_RAT	157.16	13	13	3908100	20	20	25		140005	Pyruvate carboxylase mitochondrial OS=Rattus norvegicus OX=10116 GN=Pc PE=1 SV=1
22	28	tr|D3ZG43|D3ZG43_RAT	153.34	37	37	7916300	21	21	28		30226	NADH dehydrogenase (Ubiquinone) Fe-S protein 3 (Predicted) isoform CRA_c OS=Rattus norvegicus OX=10116 GN=Ndufs3 PE=1 SV=1
46	58	tr|D4A565|D4A565_RAT	152.99	20	20	2359700	8	8	10		21664	NADH dehydrogenase (Ubiquinone) 1 beta subcomplex 5 (Predicted) isoform CRA_b OS=Rattus norvegicus OX=10116 GN=Ndufb5 PE=1 SV=1
25	27	Q60587|ECHB_RAT	148.52	24	24	3996100	16	16	22		51414	Trifunctional enzyme subunit beta mitochondrial OS=Rattus norvegicus OX=10116 GN=Hadhb PE=1 SV=1
31	66	tr|D4A0T0|D4A0T0_RAT	142.49	33	33	5381700	11	11	17		20859	NADH:ubiquinone oxidoreductase subunit B10 OS=Rattus norvegicus OX=10116 GN=Ndufb10 PE=1 SV=1
41	138	Q5XIF3|NDUS4_RAT	139.6	17	17	3371300	7	7	10		19741	NADH dehydrogenase [ubiquinone] iron-sulfur protein 4 mitochondrial OS=Rattus norvegicus OX=10116 GN=Ndufs4 PE=1 SV=1
55	119	P31399|ATP5H_RAT	139.27	30	30	1370000	8	8	8		18763	ATP synthase subunit d mitochondrial OS=Rattus norvegicus OX=10116 GN=Atp5pd PE=1 SV=3
50	63	tr|Q6QI09|Q6QI09_RAT	137.3	9	9	1501900	9	9	9		67721	ATP synthase subunit gamma mitochondrial OS=Rattus norvegicus OX=10116 GN=Taf3 PE=1 SV=1
50	64	P35435|ATPG_RAT	137.3	19	19	1501900	9	9	9		30191	ATP synthase subunit gamma mitochondrial OS=Rattus norvegicus OX=10116 GN=Atp5f1c PE=1 SV=2
32	46	P13086|SUCA_RAT	135.95	13	13	3401500	9	9	15		36148	Succinate--CoA ligase [ADP/GDP-forming] subunit alpha mitochondrial OS=Rattus norvegicus OX=10116 GN=Suclg1 PE=2 SV=2
32	47	tr|A0A0H2UHE1|A0A0H2UHE1_RAT	135.95	13	13	3401500	9	9	15		37560	Succinate--CoA ligase [ADP/GDP-forming] subunit alpha mitochondrial OS=Rattus norvegicus OX=10116 GN=Suclg1 PE=1 SV=1
45	137	tr|D4A7L4|D4A7L4_RAT	135.39	23	23	7151700	7	7	10		17634	NADH dehydrogenase (Ubiquinone) 1 beta subcomplex 11 (Predicted) OS=Rattus norvegicus OX=10116 GN=Ndufb11 PE=1 SV=1
48	181	Q80W89|NDUAB_RAT	135.19	18	18	2857200	7	7	10		14854	NADH dehydrogenase [ubiquinone] 1 alpha subcomplex subunit 11 OS=Rattus norvegicus OX=10116 GN=Ndufa11 PE=2 SV=1
39	204	tr|Q5PQZ9|Q5PQZ9_RAT	134.72	21	21	4229800	9	9	12		14359	NADH dehydrogenase [ubiquinone] 1 subunit C2 OS=Rattus norvegicus OX=10116 GN=Ndufc2 PE=1 SV=1
29	43	tr|Q5XIH3|Q5XIH3_RAT	134.64	11	11	7991500	10	10	18		50731	NADH dehydrogenase [ubiquinone] flavoprotein 1 mitochondrial OS=Rattus norvegicus OX=10116 GN=Ndufv1 PE=1 SV=1
30	35	P17764|THIL_RAT	133.75	19	19	5625600	10	10	17		44695	Acetyl-CoA acetyltransferase mitochondrial OS=Rattus norvegicus OX=10116 GN=Acat1 PE=1 SV=1
36	67	tr|L0L4L8|L0L4L8_RAT	131.95	11	11	3980000	10	10	13		42470	Cytochrome b (Fragment) OS=Rattus norvegicus OX=10116 GN=cytb PE=3 SV=1
36	68	tr|A0A140GE10|A0A140GE10_RAT	131.95	11	11	3980000	10	10	13		42574	Cytochrome b (Fragment) OS=Rattus norvegicus OX=10116 PE=3 SV=1
36	69	tr|A0A140GE11|A0A140GE11_RAT	131.95	11	11	3980000	10	10	13		42588	Cytochrome b (Fragment) OS=Rattus norvegicus OX=10116 PE=3 SV=1
36	70	tr|A0A140GE08|A0A140GE08_RAT	131.95	11	11	3980000	10	10	13		42527	Cytochrome b (Fragment) OS=Rattus norvegicus OX=10116 PE=3 SV=1
36	71	tr|A0A3Q8AGE8|A0A3Q8AGE8_RAT	131.95	11	11	3980000	10	10	13		42712	Cytochrome b (Fragment) OS=Rattus norvegicus OX=10116 GN=Cytb PE=3 SV=1
36	72	tr|A0A3Q8AC68|A0A3Q8AC68_RAT	131.95	11	11	3980000	10	10	13		42622	Cytochrome b (Fragment) OS=Rattus norvegicus OX=10116 GN=Cytb PE=3 SV=1
36	73	tr|A0A3S6FK13|A0A3S6FK13_RAT	131.95	11	11	3980000	10	10	13		42702	Cytochrome b (Fragment) OS=Rattus norvegicus OX=10116 GN=Cytb PE=3 SV=1
36	74	tr|A0A3S6FM15|A0A3S6FM15_RAT	131.95	11	11	3980000	10	10	13		42698	Cytochrome b (Fragment) OS=Rattus norvegicus OX=10116 GN=Cytb PE=3 SV=1
36	75	tr|A0A097PE40|A0A097PE40_RAT	131.95	11	11	3980000	10	10	13		42865	Cytochrome b OS=Rattus norvegicus OX=10116 GN=CYTB PE=3 SV=1
36	76	tr|A0A220D9Z6|A0A220D9Z6_RAT	131.95	11	11	3980000	10	10	13		43018	Cytochrome b OS=Rattus norvegicus OX=10116 PE=3 SV=1
36	77	tr|D6NSP2|D6NSP2_RAT	131.95	11	11	3980000	10	10	13		42945	Cytochrome b (Fragment) OS=Rattus norvegicus OX=10116 GN=cytb PE=3 SV=1
36	78	tr|D6NSS6|D6NSS6_RAT	131.95	11	11	3980000	10	10	13		42993	Cytochrome b (Fragment) OS=Rattus norvegicus OX=10116 GN=cytb PE=3 SV=1
36	79	tr|D6NSQ3|D6NSQ3_RAT	131.95	11	11	3980000	10	10	13		43012	Cytochrome b (Fragment) OS=Rattus norvegicus OX=10116 GN=cytb PE=3 SV=1
36	80	tr|D6NSR3|D6NSR3_RAT	131.95	11	11	3980000	10	10	13		42986	Cytochrome b (Fragment) OS=Rattus norvegicus OX=10116 GN=cytb PE=3 SV=1
36	81	tr|D6NSQ8|D6NSQ8_RAT	131.95	11	11	3980000	10	10	13		43016	Cytochrome b (Fragment) OS=Rattus norvegicus OX=10116 GN=cytb PE=3 SV=1
36	82	tr|D6NSR8|D6NSR8_RAT	131.95	11	11	3980000	10	10	13		42998	Cytochrome b (Fragment) OS=Rattus norvegicus OX=10116 GN=cytb PE=3 SV=1
36	83	tr|F2Q6S6|F2Q6S6_RAT	131.95	11	11	3980000	10	10	13		42938	Cytochrome b (Fragment) OS=Rattus norvegicus OX=10116 GN=cytb PE=3 SV=1
36	84	tr|A0A0A1FZ42|A0A0A1FZ42_RAT	131.95	11	11	3980000	10	10	13		42989	Cytochrome b OS=Rattus norvegicus OX=10116 GN=CYTB PE=3 SV=1
36	85	tr|D6NSS7|D6NSS7_RAT	131.95	11	11	3980000	10	10	13		42948	Cytochrome b (Fragment) OS=Rattus norvegicus OX=10116 GN=cytb PE=3 SV=1
36	86	tr|Q8SEY9|Q8SEY9_RAT	131.95	11	11	3980000	10	10	13		43015	Cytochrome b OS=Rattus norvegicus OX=10116 GN=cytb PE=3 SV=1
36	87	tr|D6NSR7|D6NSR7_RAT	131.95	11	11	3980000	10	10	13		42982	Cytochrome b (Fragment) OS=Rattus norvegicus OX=10116 GN=cytb PE=3 SV=1
36	88	tr|A0A220DA44|A0A220DA44_RAT	131.95	11	11	3980000	10	10	13		42968	Cytochrome b OS=Rattus norvegicus OX=10116 PE=3 SV=1
36	89	tr|F2Q6S5|F2Q6S5_RAT	131.95	11	11	3980000	10	10	13		42952	Cytochrome b (Fragment) OS=Rattus norvegicus OX=10116 GN=cytb PE=3 SV=1
36	90	tr|D6NSQ6|D6NSQ6_RAT	131.95	11	11	3980000	10	10	13		42952	Cytochrome b (Fragment) OS=Rattus norvegicus OX=10116 GN=cytb PE=3 SV=1
36	91	tr|Q5UAI7|Q5UAI7_RAT	131.95	11	11	3980000	10	10	13		42998	Cytochrome b OS=Rattus norvegicus OX=10116 GN=CYTB PE=3 SV=1
36	92	tr|A0A0S1Z1V9|A0A0S1Z1V9_RAT	131.95	11	11	3980000	10	10	13		43002	Cytochrome b OS=Rattus norvegicus OX=10116 GN=CYTB PE=3 SV=1
36	93	tr|Q8HIC4|Q8HIC4_RAT	131.95	11	11	3980000	10	10	13		43012	Cytochrome b OS=Rattus norvegicus OX=10116 GN=Mt-cyb PE=3 SV=1
36	94	tr|A0A220DA02|A0A220DA02_RAT	131.95	11	11	3980000	10	10	13		42968	Cytochrome b OS=Rattus norvegicus OX=10116 PE=3 SV=1
36	95	tr|A0A0S1Z1V4|A0A0S1Z1V4_RAT	131.95	11	11	3980000	10	10	13		43016	Cytochrome b OS=Rattus norvegicus OX=10116 GN=CYTB PE=3 SV=1
36	96	tr|R9TKN1|R9TKN1_RAT	131.95	11	11	3980000	10	10	13		43012	Cytochrome b OS=Rattus norvegicus OX=10116 GN=CYTB PE=3 SV=1
36	97	P00159|CYB_RAT	131.95	11	11	3980000	10	10	13		43012	Cytochrome b OS=Rattus norvegicus OX=10116 GN=Mt-Cyb PE=3 SV=3
36	98	tr|L0N311|L0N311_RAT	131.95	11	11	3980000	10	10	13		43045	Cytochrome b (Fragment) OS=Rattus norvegicus OX=10116 GN=cytb PE=3 SV=1
36	99	tr|A0A220DA28|A0A220DA28_RAT	131.95	11	11	3980000	10	10	13		42970	Cytochrome b OS=Rattus norvegicus OX=10116 PE=3 SV=1
36	100	tr|H2KXA0|H2KXA0_RAT	131.95	11	11	3980000	10	10	13		42978	Cytochrome b (Fragment) OS=Rattus norvegicus OX=10116 GN=cytb PE=3 SV=1
36	101	tr|A0A096XNM4|A0A096XNM4_RAT	131.95	11	11	3980000	10	10	13		43042	Cytochrome b (Fragment) OS=Rattus norvegicus OX=10116 PE=3 SV=1
36	102	tr|D6NSP5|D6NSP5_RAT	131.95	11	11	3980000	10	10	13		43012	Cytochrome b (Fragment) OS=Rattus norvegicus OX=10116 GN=cytb PE=3 SV=1
36	103	tr|F8QU37|F8QU37_RAT	131.95	11	11	3980000	10	10	13		42992	Cytochrome b (Fragment) OS=Rattus norvegicus OX=10116 GN=cytb PE=3 SV=1
36	116	tr|D6NSQ0|D6NSQ0_RAT	131.95	11	11	3980000	10	10	13		42968	Cytochrome b (Fragment) OS=Rattus norvegicus OX=10116 GN=cytb PE=3 SV=1
36	120	tr|A0A411P2I9|A0A411P2I9_RAT	131.95	11	11	3980000	10	10	13		40144	Cytochrome b (Fragment) OS=Rattus norvegicus OX=10116 GN=Cytb PE=3 SV=1
36	121	tr|A0A0U2M179|A0A0U2M179_RAT	131.95	11	11	3980000	10	10	13		41037	Cytochrome b (Fragment) OS=Rattus norvegicus OX=10116 PE=3 SV=1
36	122	tr|A0A411P2L0|A0A411P2L0_RAT	131.95	11	11	3980000	10	10	13		41017	Cytochrome b (Fragment) OS=Rattus norvegicus OX=10116 GN=Cytb PE=3 SV=1
36	123	tr|F8QU31|F8QU31_RAT	131.95	11	11	3980000	10	10	13		42181	Cytochrome b (Fragment) OS=Rattus norvegicus OX=10116 GN=cytb PE=3 SV=1
36	124	tr|A0A411P2K0|A0A411P2K0_RAT	131.95	11	11	3980000	10	10	13		42238	Cytochrome b (Fragment) OS=Rattus norvegicus OX=10116 GN=Cytb PE=3 SV=1
36	125	tr|A0A385HCC9|A0A385HCC9_RAT	131.95	11	11	3980000	10	10	13		42766	Cytochrome b (Fragment) OS=Rattus norvegicus OX=10116 PE=3 SV=1
36	127	tr|D6NSP4|D6NSP4_RAT	131.95	11	11	3980000	10	10	13		43016	Cytochrome b (Fragment) OS=Rattus norvegicus OX=10116 GN=cytb PE=3 SV=1
36	128	tr|D6NSR2|D6NSR2_RAT	131.95	11	11	3980000	10	10	13		43073	Cytochrome b (Fragment) OS=Rattus norvegicus OX=10116 GN=cytb PE=3 SV=1
36	129	tr|D6NSR1|D6NSR1_RAT	131.95	11	11	3980000	10	10	13		43002	Cytochrome b (Fragment) OS=Rattus norvegicus OX=10116 GN=cytb PE=3 SV=1
36	132	tr|A0A0U2IDR8|A0A0U2IDR8_RAT	131.95	11	11	3980000	10	10	13		40981	Cytochrome b (Fragment) OS=Rattus norvegicus OX=10116 PE=3 SV=1
34	36	tr|B5DEY1|B5DEY1_RAT	131.88	11	11	44283	12	1	14		84183	Afg3l1 protein (Fragment) OS=Rattus norvegicus OX=10116 GN=Afg3l1 PE=2 SV=1
34	37	tr|D3ZZ20|D3ZZ20_RAT	131.88	10	10	44283	12	1	14		87203	AFG3(ATPase family gene 3)-like 1 (S. cerevisiae) OS=Rattus norvegicus OX=10116 GN=Afg3l1 PE=1 SV=2
42	41	tr|D4A3V2|D4A3V2_RAT	127.28	42	42	1384700	8	8	10	Oxidation (M)	15224	NADH dehydrogenase [ubiquinone] 1 alpha subcomplex subunit 6 OS=Rattus norvegicus OX=10116 GN=Ndufa6 PE=1 SV=1
69	277	tr|B2RZ24|B2RZ24_RAT	125.76	6	6	323800	5	5	5		47388	Succinate-CoA ligase subunit beta (Fragment) OS=Rattus norvegicus OX=10116 GN=Sucla2 PE=2 SV=1
69	278	tr|F1LM47|F1LM47_RAT	125.76	6	6	323800	5	5	5		50306	Succinate--CoA ligase [ADP-forming] subunit beta mitochondrial OS=Rattus norvegicus OX=10116 GN=Sucla2 PE=1 SV=1
38	55	tr|B0BNE6|B0BNE6_RAT	125.04	16	16	1864600	10	9	12		23970	NADH dehydrogenase (Ubiquinone) Fe-S protein 8 (Predicted) isoform CRA_a OS=Rattus norvegicus OX=10116 GN=Ndufs8 PE=1 SV=1
65	142	tr|D3ZCZ9|D3ZCZ9_RAT	123.05	21	21	1915300	5	5	6		13040	NADH dehydrogenase [ubiquinone] iron-sulfur protein 6 mitochondrial OS=Rattus norvegicus OX=10116 GN=LOC100912599 PE=1 SV=1
53	52	tr|M0RAM5|M0RAM5_RAT	119.1	24	24	2095100	8	8	8		22155	Glutathione peroxidase OS=Rattus norvegicus OX=10116 GN=Gpx1 PE=1 SV=1
53	53	P04041|GPX1_RAT	119.1	24	24	2095100	8	8	8		22305	Glutathione peroxidase 1 OS=Rattus norvegicus OX=10116 GN=Gpx1 PE=1 SV=4
44	45	P04762|CATA_RAT	117.9	9	9	1300500	9	9	10		59757	Catalase OS=Rattus norvegicus OX=10116 GN=Cat PE=1 SV=3
66	145	tr|F1LPG5|F1LPG5_RAT	116.18	24	24	1719400	5	5	6		15064	NADH:ubiquinone oxidoreductase subunit B4 OS=Rattus norvegicus OX=10116 GN=Ndufb4 PE=1 SV=1
58	61	P29147|BDH_RAT	112.91	13	13	798830	6	5	7		38202	D-beta-hydroxybutyrate dehydrogenase mitochondrial OS=Rattus norvegicus OX=10116 GN=Bdh1 PE=1 SV=2
58	62	tr|A0A0G2JSH2|A0A0G2JSH2_RAT	112.91	12	12	798830	6	5	7		38333	3-hydroxybutyrate dehydrogenase type 1 isoform CRA_a OS=Rattus norvegicus OX=10116 GN=Bdh1 PE=1 SV=1
63	109	tr|A0A140TAG5|A0A140TAG5_RAT	112.35	8	8	1034200	6	6	6		67049	MICOS complex subunit MIC60 OS=Rattus norvegicus OX=10116 GN=Immt PE=1 SV=1
63	110	Q3KR86|MIC60_RAT	112.35	8	8	1034200	6	6	6		67177	MICOS complex subunit Mic60 (Fragment) OS=Rattus norvegicus OX=10116 GN=Immt PE=1 SV=1
63	115	tr|A0A0G2JVH4|A0A0G2JVH4_RAT	112.35	6	6	1034200	6	6	6		86230	MICOS complex subunit MIC60 OS=Rattus norvegicus OX=10116 GN=Immt PE=1 SV=1
56	182	tr|Q06QG6|Q06QG6_RAT	107.66	5	5	1234800	5	5	7		68588	NADH-ubiquinone oxidoreductase chain 5 OS=Rattus norvegicus OX=10116 GN=ND5 PE=3 SV=1
56	183	tr|Q06QK5|Q06QK5_RAT	107.66	5	5	1234800	5	5	7		68606	NADH-ubiquinone oxidoreductase chain 5 OS=Rattus norvegicus OX=10116 GN=ND5 PE=3 SV=1
56	184	P11661|NU5M_RAT	107.66	5	5	1234800	5	5	7		68618	NADH-ubiquinone oxidoreductase chain 5 OS=Rattus norvegicus OX=10116 GN=Mtnd5 PE=3 SV=3
56	185	tr|Q06QA1|Q06QA1_RAT	107.66	5	5	1234800	5	5	7		68574	NADH-ubiquinone oxidoreductase chain 5 OS=Rattus norvegicus OX=10116 GN=ND5 PE=3 SV=1
56	186	tr|Q8SEZ0|Q8SEZ0_RAT	107.66	5	5	1234800	5	5	7		68618	NADH-ubiquinone oxidoreductase chain 5 OS=Rattus norvegicus OX=10116 GN=Mt-nd5 PE=3 SV=1
56	187	tr|A0A096XKT9|A0A096XKT9_RAT	107.66	5	5	1234800	5	5	7		68584	NADH-ubiquinone oxidoreductase chain 5 OS=Rattus norvegicus OX=10116 GN=ND5 PE=3 SV=1
60	133	Q63362|NDUA5_RAT	104.74	26	26	1523300	5	5	7		13412	NADH dehydrogenase [ubiquinone] 1 alpha subcomplex subunit 5 OS=Rattus norvegicus OX=10116 GN=Ndufa5 PE=1 SV=3
57	59	P17178|CP27A_RAT	100.49	13	13	656960	6	6	7	Oxidation (M)	60733	Sterol 26-hydroxylase mitochondrial OS=Rattus norvegicus OX=10116 GN=Cyp27a1 PE=1 SV=1
57	60	tr|A0A0H2UHN7|A0A0H2UHN7_RAT	100.49	12	12	656960	6	6	7	Oxidation (M)	62492	RCG24013 isoform CRA_a OS=Rattus norvegicus OX=10116 GN=Cyp27a1 PE=1 SV=1
67	338	Q5M9I5|QCR6_RAT	100.41	18	18	2771200	4	4	6		10424	Cytochrome b-c1 complex subunit 6 mitochondrial OS=Rattus norvegicus OX=10116 GN=Uqcrh PE=3 SV=1
35	56	tr|Q6P6W6|Q6P6W6_RAT	99.17	19	19	4699200	7	7	13		31701	NADH dehydrogenase [ubiquinone] 1 alpha subcomplex subunit 10 mitochondrial OS=Rattus norvegicus OX=10116 GN=Ndufa10 PE=2 SV=1
35	57	Q561S0|NDUAA_RAT	99.17	14	14	4699200	7	7	13		40493	NADH dehydrogenase [ubiquinone] 1 alpha subcomplex subunit 10 mitochondrial OS=Rattus norvegicus OX=10116 GN=Ndufa10 PE=1 SV=1
72	139	Q6AXV4|SAM50_RAT	98.69	10	10	746840	4	4	5		51960	Sorting and assembly machinery component 50 homolog OS=Rattus norvegicus OX=10116 GN=Samm50 PE=1 SV=1
40	50	Q02253|MMSA_RAT	97.94	13	13	1061600	10	9	11	Carbamidomethylation		Methylmalonate-semialdehyde dehydrogenase [acylating], mitochondrial
40	51	tr|G3V7J0|G3V7J0_RAT	97.94	13	13	1061600	10	9	11	Carbamidomethylation		Methylmalonate-semialdehyde dehydrogenase [acylating], mitochondrial
88	257	tr|A9UMW2|A9UMW2_RAT	95.87	28	28	765120	3	2	4	Oxidation (M)	9255	Ndufa3 protein (Fragment) OS=Rattus norvegicus OX=10116 GN=Ndufa3 PE=2 SV=1
88	258	tr|M0RB63|M0RB63_RAT	95.87	27	27	765120	3	2	4	Oxidation (M)	9372	RCG63041 OS=Rattus norvegicus OX=10116 GN=LOC684509 PE=4 SV=1
88	259	tr|A0A0G2KAA3|A0A0G2KAA3_RAT	95.87	25	25	765120	3	2	4	Oxidation (M)	10170	NADH:ubiquinone oxidoreductase subunit A3 OS=Rattus norvegicus OX=10116 GN=Ndufa3 PE=1 SV=1
49	104	tr|Q5UAJ6|Q5UAJ6_RAT	95	18	18	2455800	8	8	9	Oxidation (M)	25942	Cytochrome c oxidase subunit 2 OS=Rattus norvegicus OX=10116 GN=COX2 PE=3 SV=1
49	111	tr|S5RZM8|S5RZM8_RAT	95	18	18	2455800	8	8	9	Oxidation (M)	25958	Cytochrome c oxidase subunit 2 OS=Rattus norvegicus OX=10116 GN=COX2 PE=3 SV=1
49	112	P00406|COX2_RAT	95	18	18	2455800	8	8	9	Oxidation (M)	25928	Cytochrome c oxidase subunit 2 OS=Rattus norvegicus OX=10116 GN=Mtco2 PE=1 SV=3
49	113	tr|Q8SEZ5|Q8SEZ5_RAT	95	18	18	2455800	8	8	9	Oxidation (M)	25928	Cytochrome c oxidase subunit 2 OS=Rattus norvegicus OX=10116 GN=Mt-co2 PE=1 SV=1
49	114	tr|A0A097PE04|A0A097PE04_RAT	95	18	18	2455800	8	8	9	Oxidation (M)	25894	Cytochrome c oxidase subunit 2 OS=Rattus norvegicus OX=10116 GN=COX2 PE=3 SV=1
90	200	Q5XI78|ODO1_RAT	89.24	3	3	352990	3	2	3		116296	2-oxoglutarate dehydrogenase mitochondrial OS=Rattus norvegicus OX=10116 GN=Ogdh PE=1 SV=1
59	65	tr|D3ZE15|D3ZE15_RAT	88.79	26	26	578190	6	6	7	Oxidation (M)	16777	NADH:ubiquinone oxidoreductase subunit A13 OS=Rattus norvegicus OX=10116 GN=Ndufa13 PE=1 SV=1
52	54	P18163|ACSL1_RAT	86.21	7	7	1687200	6	6	8		78179	Long-chain-fatty-acid--CoA ligase 1 OS=Rattus norvegicus OX=10116 GN=Acsl1 PE=1 SV=1
47	134	tr|B2RYS2|B2RYS2_RAT	83.94	39	39	2617500	6	6	10	Oxidation (M)	13559	Cytochrome b-c1 complex subunit 7 OS=Rattus norvegicus OX=10116 GN=Uqcrb PE=1 SV=1
62	135	tr|D3ZZ21|D3ZZ21_RAT	80.06	34	34	1703500	4	4	6		15638	NADH dehydrogenase (Ubiquinone) 1 beta subcomplex 6 (Predicted) OS=Rattus norvegicus OX=10116 GN=Ndufb6 PE=1 SV=1
95	210	tr|Q5M949|Q5M949_RAT	79.1	6	6	656780	3	3	3		28340	Nipsnap homolog 3A (C. elegans) OS=Rattus norvegicus OX=10116 GN=Nipsnap3b PE=1 SV=1
111	201	P45953|ACADV_RAT	78.74	4	4	21590	2	2	2		70749	Very long-chain specific acyl-CoA dehydrogenase mitochondrial OS=Rattus norvegicus OX=10116 GN=Acadvl PE=1 SV=1
111	202	tr|Q5M9H2|Q5M9H2_RAT	78.74	4	4	21590	2	2	2		70821	Acyl-Coenzyme A dehydrogenase very long chain OS=Rattus norvegicus OX=10116 GN=Acadvl PE=1 SV=1
68	193	P08461|ODP2_RAT	75.51	8	8	871410	4	4	5		67166	Dihydrolipoyllysine-residue acetyltransferase component of pyruvate dehydrogenase complex mitochondrial OS=Rattus norvegicus OX=10116 GN=Dlat PE=1 SV=3
79	140	tr|F1LN88|F1LN88_RAT	74.94	8	8	369850	4	3	4		56517	Aldehyde dehydrogenase mitochondrial OS=Rattus norvegicus OX=10116 GN=Aldh2 PE=1 SV=2
79	141	P11884|ALDH2_RAT	74.94	8	8	369850	4	3	4		56488	Aldehyde dehydrogenase mitochondrial OS=Rattus norvegicus OX=10116 GN=Aldh2 PE=1 SV=1
54	147	P05508|NU4M_RAT	74.05	12	12	588340	6	5	8	Oxidation (M)		NADH-ubiquinone oxidoreductase chain 4
54	148	tr|D2E6K0|D2E6K0_RAT	74.05	12	12	588340	6	5	8	Oxidation (M)
54	149	tr|A7XYB9|A7XYB9_RAT	74.05	12	12	588340	6	5	8	Oxidation (M)
54	150	tr|Q06QE1|Q06QE1_RAT	74.05	12	12	588340	6	5	8	Oxidation (M)
54	151	tr|Q06QA2|Q06QA2_RAT	74.05	12	12	588340	6	5	8	Oxidation (M)
54	152	tr|Q7HKW3|Q7HKW3_RAT	74.05	12	12	588340	6	5	8	Oxidation (M)
54	153	tr|Q06QG7|Q06QG7_RAT	74.05	12	12	588340	6	5	8	Oxidation (M)
54	154	tr|Q06Q89|Q06Q89_RAT	74.05	12	12	588340	6	5	8	Oxidation (M)
54	155	tr|Q35737|Q35737_RAT	74.05	12	12	588340	6	5	8	Oxidation (M)
54	156	tr|Q8HIC6|Q8HIC6_RAT	74.05	12	12	588340	6	5	8	Oxidation (M)
83	190	P07824|ARGI1_RAT	73.82	12	12	4100700	3	3	4		34973	Arginase-1 OS=Rattus norvegicus OX=10116 GN=Arg1 PE=1 SV=2
85	247	P10888|COX41_RAT	73.24	15	15	1046100	4	4	4		19515	Cytochrome c oxidase subunit 4 isoform 1 mitochondrial OS=Rattus norvegicus OX=10116 GN=Cox4i1 PE=1 SV=1
64	191	P02770|ALBU_RAT	72.68	4	4	1596500	5	5	6	Formylation	68731	Serum albumin OS=Rattus norvegicus OX=10116 GN=Alb PE=1 SV=2
64	192	tr|A0A0G2JSH5|A0A0G2JSH5_RAT	72.68	4	4	1596500	5	5	6	Formylation	68759	Serum albumin OS=Rattus norvegicus OX=10116 GN=Alb PE=1 SV=1
73	245	tr|A9UMV9|A9UMV9_RAT	69.21	19	19	3126000	2	2	5		12500	NADH:ubiquinone oxidoreductase subunit A7 OS=Rattus norvegicus OX=10116 GN=Ndufa7 PE=1 SV=1
101	224	tr|D3ZXF9|D3ZXF9_RAT	68.89	8	8	462770	3	3	3		29441	Mitochondrial ribosomal protein L12 OS=Rattus norvegicus OX=10116 GN=Mrpl12 PE=1 SV=1
86	249	tr|F1LXA0|F1LXA0_RAT	68.47	14	14	1297400	2	2	4		17178	NADH dehydrogenase [ubiquinone] 1 alpha subcomplex subunit 12 OS=Rattus norvegicus OX=10116 GN=Ndufa12 PE=1 SV=2
51	246	P19511|AT5F1_RAT	68	9	9	2375500	3	3	8		28869	ATP synthase F(0) complex subunit B1 mitochondrial OS=Rattus norvegicus OX=10116 GN=Atp5pb PE=1 SV=1
70	143	tr|Q5EBA4|Q5EBA4_RAT	65.79	13	13	754430	4	4	5		33215	Nipsnap1 protein (Fragment) OS=Rattus norvegicus OX=10116 GN=Nipsnap1 PE=2 SV=1
70	144	tr|G3V728|G3V728_RAT	65.79	13	13	754430	4	4	5		33346	4-nitrophenylphosphatase domain and non-neuronal SNAP25-like protein homolog 1 (C. elegans) isoform CRA_b OS=Rattus norvegicus OX=10116 GN=Nipsnap1 PE=1 SV=1
141	340	tr|B2RZ57|B2RZ57_RAT	63.58	8	8	218460	2	2	2		20651	Mitochondrial ribosomal protein L18 OS=Rattus norvegicus OX=10116 GN=Mrpl18 PE=1 SV=1
117	265	Q63750|RM23_RAT	61.94	22	22	423380	2	2	2		17050	39S ribosomal protein L23 mitochondrial OS=Rattus norvegicus OX=10116 GN=Mrpl23 PE=2 SV=1
106	346	tr|D3ZS58|D3ZS58_RAT	61.42	11	11	659500	3	3	3		10845	NADH dehydrogenase [ubiquinone] 1 alpha subcomplex subunit 2 OS=Rattus norvegicus OX=10116 GN=Ndufa2 PE=1 SV=1
100	223	P0C2C4|RM10_RAT	60.76	8	8	358420	2	2	3		29940	39S ribosomal protein L10 mitochondrial OS=Rattus norvegicus OX=10116 GN=Mrpl10 PE=1 SV=1
100	287	tr|D3ZX69|D3ZX69_RAT	60.76	8	8	358420	2	2	3		29466	39S ribosomal protein L10 mitochondrial OS=Rattus norvegicus OX=10116 GN=Mrpl10 PE=1 SV=1
71	168	Q7TT47|SPG7_RAT	59.97	6	6	258270	4	4	5		86103	Paraplegin OS=Rattus norvegicus OX=10116 GN=Spg7 PE=2 SV=2
82	188	O70351|HCD2_RAT	59.9	10	10	403610	3	3	4		27246	3-hydroxyacyl-CoA dehydrogenase type-2 OS=Rattus norvegicus OX=10116 GN=Hsd17b10 PE=1 SV=3
82	189	tr|B0BMW2|B0BMW2_RAT	59.9	10	10	403610	3	3	4		27250	3-hydroxyacyl-CoA dehydrogenase type-2 OS=Rattus norvegicus OX=10116 GN=Hsd17b10 PE=1 SV=1
84	195	P49432|ODPB_RAT	59.81	8	8	353700	3	3	4		38982	Pyruvate dehydrogenase E1 component subunit beta mitochondrial OS=Rattus norvegicus OX=10116 GN=Pdhb PE=1 SV=2
84	196	tr|A0A0G2KAM3|A0A0G2KAM3_RAT	59.81	7	7	353700	3	3	4		46193	Pyruvate dehydrogenase E1 component subunit beta OS=Rattus norvegicus OX=10116 GN=Pdhb PE=1 SV=1
75	289	tr|Q5XFW4|Q5XFW4_RAT	59.8	14	14	367460	3	3	5		20541	Mitochondrial ribosomal protein L13 OS=Rattus norvegicus OX=10116 GN=Mrpl13 PE=1 SV=1
98	198	tr|B5DEL8|B5DEL8_RAT	59.13	21	21	664600	3	3	3		12700	NADH dehydrogenase (Ubiquinone) Fe-S protein 5 OS=Rattus norvegicus OX=10116 GN=Ndufs5 PE=1 SV=1
98	199	tr|A0A0G2JZJ9|A0A0G2JZJ9_RAT	59.13	21	21	664600	3	3	3		12730	Uncharacterized protein OS=Rattus norvegicus OX=10116 PE=4 SV=1
104	197	tr|M0R6J0|M0R6J0_RAT	59.1	9	9	237680	3	3	3		38374	Mitochondrial ribosomal protein L39 OS=Rattus norvegicus OX=10116 GN=Mrpl39 PE=1 SV=2
114	208	P13803|ETFA_RAT	58.36	7	7	380600	2	2	2		34951	Electron transfer flavoprotein subunit alpha mitochondrial OS=Rattus norvegicus OX=10116 GN=Etfa PE=1 SV=4
89	286	Q7TQ16|QCR8_RAT	58.35	22	22	615360	4	4	4		9849	Cytochrome b-c1 complex subunit 8 OS=Rattus norvegicus OX=10116 GN=Uqcrq PE=3 SV=1
87	250	P08011|MGST1_RAT	58.31	15	15	468430	4	4	4		17472	Microsomal glutathione S-transferase 1 OS=Rattus norvegicus OX=10116 GN=Mgst1 PE=1 SV=3
87	251	tr|B6DYQ4|B6DYQ4_RAT	58.31	15	15	468430	4	4	4		17472	Microsomal glutathione S-transferase OS=Rattus norvegicus OX=10116 GN=Mgst1 PE=2 SV=1
99	222	tr|Q4G067|Q4G067_RAT	57.98	8	8	325160	3	3	3		37440	Mitochondrial ribosomal protein L44 OS=Rattus norvegicus OX=10116 GN=Mrpl44 PE=1 SV=1
80	146	tr|B0BMT9|B0BMT9_RAT	57.6	6	6	784920	3	3	4		50202	Sqrdl protein OS=Rattus norvegicus OX=10116 GN=Sqor PE=1 SV=1
61	171	tr|D3ZFJ6|D3ZFJ6_RAT	57.43	12	12	761760	5	5	7		60420	Lactamase beta OS=Rattus norvegicus OX=10116 GN=Lactb PE=1 SV=1
259	337	P80432|COX7C_RAT	57.02	21	21	225570	1	1	1		7375	Cytochrome c oxidase subunit 7C mitochondrial OS=Rattus norvegicus OX=10116 GN=Cox7c PE=1 SV=2
138	264	tr|D3ZTW8|D3ZTW8_RAT	56.73	14	14	769040	2	2	2		15823	Mitochondrial ribosomal protein L27 OS=Rattus norvegicus OX=10116 GN=Mrpl27 PE=1 SV=2
97	194	tr|Q5RJN0|Q5RJN0_RAT	56.57	11	11	670480	3	3	3	Oxidation (M)	23945	NADH dehydrogenase (Ubiquinone) Fe-S protein 7 OS=Rattus norvegicus OX=10116 GN=Ndufs7 PE=1 SV=1
187	248	tr|D3ZUX5|D3ZUX5_RAT	55.22	5	5	241350	1	1	1		26435	MICOS complex subunit OS=Rattus norvegicus OX=10116 GN=Chchd3 PE=1 SV=1
126	211	P70584|ACDSB_RAT	54.8	5	5	571350	2	2	2		47824	Short/branched chain specific acyl-CoA dehydrogenase mitochondrial OS=Rattus norvegicus OX=10116 GN=Acadsb PE=1 SV=1
126	212	tr|A0A0A0MY00|A0A0A0MY00_RAT	54.8	4	4	571350	2	2	2		52043	Short/branched chain-specific acyl-CoA dehydrogenase mitochondrial OS=Rattus norvegicus OX=10116 GN=Acadsb PE=1 SV=2
77	216	Q9R063|PRDX5_RAT	53.78	10	10	1060300	3	3	4		22179	Peroxiredoxin-5 mitochondrial OS=Rattus norvegicus OX=10116 GN=Prdx5 PE=1 SV=1
77	217	tr|A0A0G2JSS8|A0A0G2JSS8_RAT	53.78	10	10	1060300	3	3	4		22207	Peroxiredoxin OS=Rattus norvegicus OX=10116 GN=Prdx5 PE=1 SV=1
78	238	tr|B2RYT5|B2RYT5_RAT	52.19	11	11	1621400	3	3	4		12651	Cox7a2l protein OS=Rattus norvegicus OX=10116 GN=Cox7a2l PE=2 SV=1
78	239	tr|D3ZYX8|D3ZYX8_RAT	52.19	10	10	1621400	3	3	4		13274	Cytochrome c oxidase subunit 7A2-like OS=Rattus norvegicus OX=10116 GN=Cox7a2l PE=1 SV=1
93	220	P11960|ODBA_RAT	50.57	6	6	144890	3	2	3		50165	2-oxoisovalerate dehydrogenase subunit alpha mitochondrial (Fragment) OS=Rattus norvegicus OX=10116 GN=Bckdha PE=1 SV=1
127	218	P63039|CH60_RAT	49.87	3	3	634750	2	2	2		60956	60 kDa heat shock protein mitochondrial OS=Rattus norvegicus OX=10116 GN=Hspd1 PE=1 SV=1
127	219	tr|A0A482IDN3|A0A482IDN3_RAT	49.87	3	3	634750	2	2	2		60956	Hsp60 OS=Rattus norvegicus OX=10116 GN=Hspd1 PE=2 SV=1
74	283	Q9WVK3|PECR_RAT	48.47	9	9	852140	4	4	5	Oxidation (M)	32433	Peroxisomal trans-2-enoyl-CoA reductase OS=Rattus norvegicus OX=10116 GN=Pecr PE=2 SV=1
74	284	tr|A0A0G2JVG4|A0A0G2JVG4_RAT	48.47	9	9	852140	4	4	5	Oxidation (M)	32737	Peroxisomal trans-2-enoyl-CoA reductase OS=Rattus norvegicus OX=10116 GN=Pecr PE=1 SV=1
171	240	A0A0G2K047|ACSS3_RAT	45.64	1	1	158900	1	1	1		74675	Acyl-CoA synthetase short-chain family member 3 mitochondrial OS=Rattus norvegicus OX=10116 GN=Acss3 PE=1 SV=1
176	254	P0CG51|UBB_RAT	45.49	4	4	0	1	1	1		34369	Polyubiquitin-B OS=Rattus norvegicus OX=10116 GN=Ubb PE=1 SV=1
160	229	tr|Q06QK0|Q06QK0_RAT	45.31	2	2	224300	1	1	1		56880	Cytochrome c oxidase subunit 1 OS=Rattus norvegicus OX=10116 GN=CO1 PE=3 SV=1
160	230	tr|Q8SEZ6|Q8SEZ6_RAT	45.31	2	2	224300	1	1	1		56879	Cytochrome c oxidase subunit 1 OS=Rattus norvegicus OX=10116 GN=COI PE=3 SV=1
160	231	tr|A0A0A1FZ34|A0A0A1FZ34_RAT	45.31	2	2	224300	1	1	1		56937	Cytochrome c oxidase subunit 1 OS=Rattus norvegicus OX=10116 GN=COX1 PE=3 SV=1
160	232	tr|Q8HIC9|Q8HIC9_RAT	45.31	2	2	224300	1	1	1		56845	Cytochrome c oxidase subunit 1 OS=Rattus norvegicus OX=10116 GN=Mt-co1 PE=3 SV=1
160	233	P05503|COX1_RAT	45.31	2	2	224300	1	1	1		56845	Cytochrome c oxidase subunit 1 OS=Rattus norvegicus OX=10116 GN=Mtco1 PE=2 SV=3
160	234	tr|Q95938|Q95938_RAT	45.31	2	2	224300	1	1	1		56977	Cytochrome c oxidase subunit 1 OS=Rattus norvegicus OX=10116 GN=Co I PE=3 SV=1
160	241	tr|Q06QA9|Q06QA9_RAT	45.31	2	2	224300	1	1	1		56893	Cytochrome c oxidase subunit 1 OS=Rattus norvegicus OX=10116 GN=CO1 PE=3 SV=1
125	207	tr|G3V6I4|G3V6I4_RAT	44.65	5	5	400330	2	2	2		37791	Mitochondrial amidoxime reducing component 1 OS=Rattus norvegicus OX=10116 GN=Marc1 PE=1 SV=1
260	341	tr|G3V6I5|G3V6I5_RAT	43.54	4	4	203750	1	1	1		46777	DnaJ heat shock protein family (Hsp40) member A3 OS=Rattus norvegicus OX=10116 GN=Dnaja3 PE=1 SV=2
260	342	tr|Q2TVU3|Q2TVU3_RAT	43.54	4	4	203750	1	1	1		49412	TID1 OS=Rattus norvegicus OX=10116 GN=Dnaja3 PE=2 SV=1
260	343	tr|A0A0G2K4Y1|A0A0G2K4Y1_RAT	43.54	4	4	203750	1	1	1		49416	DnaJ heat shock protein family (Hsp40) member A3 OS=Rattus norvegicus OX=10116 GN=Dnaja3 PE=1 SV=1
260	344	tr|Q2UZS7|Q2UZS7_RAT	43.54	3	3	203750	1	1	1		52399	Tid-1 long isoform OS=Rattus norvegicus OX=10116 GN=Dnaja3 PE=2 SV=1
260	345	tr|A0A0G2K5E4|A0A0G2K5E4_RAT	43.54	3	3	203750	1	1	1		52403	DnaJ heat shock protein family (Hsp40) member A3 OS=Rattus norvegicus OX=10116 GN=Dnaja3 PE=1 SV=1
220	300	Q5PQT3|GLYAT_RAT	42.89	4	4	104690	1	1	1		33899	Glycine N-acyltransferase OS=Rattus norvegicus OX=10116 GN=Glyat PE=2 SV=1
220	301	tr|A4PB92|A4PB92_RAT	42.89	4	4	104690	1	1	1		33899	Glycine N-acyltransferase OS=Rattus norvegicus OX=10116 GN=Glyat PE=2 SV=1
220	302	tr|A0A0G2JWI5|A0A0G2JWI5_RAT	42.89	3	3	104690	1	1	1		39453	Glycine N-acyltransferase OS=Rattus norvegicus OX=10116 GN=Glyat PE=1 SV=1
220	303	tr|B1H250|B1H250_RAT	42.89	4	4	104690	1	1	1		33986	Glycine-N-acyltransferase-like 1 OS=Rattus norvegicus OX=10116 GN=Glyatl1 PE=1 SV=1
136	255	tr|I6V4L9|I6V4L9_RAT	42.82	6	6	93451	2	2	2		29844	Cytochrome c oxidase subunit 3 OS=Rattus norvegicus OX=10116 GN=COX3 PE=3 SV=1
137	260	P35738|ODBB_RAT	42.82	5	5	90622	2	2	2		42823	2-oxoisovalerate dehydrogenase subunit beta mitochondrial OS=Rattus norvegicus OX=10116 GN=Bckdhb PE=1 SV=3
137	261	tr|A0A0A0MXW1|A0A0A0MXW1_RAT	42.82	5	5	90622	2	2	2		42960	2-oxoisovalerate dehydrogenase subunit beta mitochondrial OS=Rattus norvegicus OX=10116 GN=Bckdhb PE=1 SV=1
140	297	Q924S5|LONM_RAT	41.96	2	2	138430	2	2	2		105792	Lon protease homolog mitochondrial OS=Rattus norvegicus OX=10116 GN=Lonp1 PE=2 SV=1
129	298	P11951|CX6C2_RAT	41.25	17	17	259150	2	2	2		8455	Cytochrome c oxidase subunit 6C-2 OS=Rattus norvegicus OX=10116 GN=Cox6c2 PE=1 SV=3
261	347	tr|D4A3E8|D4A3E8_RAT	40.96	3	3	235350	1	1	1		47648	Mitochondrial ribosomal protein S27 OS=Rattus norvegicus OX=10116 GN=Mrps27 PE=1 SV=1
222	309	P22071|3BHS1_RAT	40.96	3	3	54875	1	1	1		42037	3 beta-hydroxysteroid dehydrogenase/Delta 5-->4-isomerase type 1 OS=Rattus norvegicus OX=10116 GN=Hsd3b1 PE=1 SV=3
222	310	P22072|3BHS2_RAT	40.96	3	3	54875	1	1	1		42277	3 beta-hydroxysteroid dehydrogenase/Delta 5-->4-isomerase type 2 OS=Rattus norvegicus OX=10116 GN=Hsd3b PE=2 SV=3
222	311	P27364|3BHS5_RAT	40.96	3	3	54875	1	1	1		42206	NADPH-dependent 3-keto-steroid reductase Hsd3b5 OS=Rattus norvegicus OX=10116 GN=Hsd3b5 PE=1 SV=3
105	267	tr|Q06Q97|Q06Q97_RAT	39.36	6	6	155590	2	2	3		38485	NADH-ubiquinone oxidoreductase chain 2 OS=Rattus norvegicus OX=10116 GN=ND2 PE=3 SV=1
105	268	tr|A0A0A1G491|A0A0A1G491_RAT	39.36	6	6	155590	2	2	3		38542	NADH-ubiquinone oxidoreductase chain 2 OS=Rattus norvegicus OX=10116 GN=ND2 PE=3 SV=1
105	269	tr|Q5UAJ8|Q5UAJ8_RAT	39.36	6	6	155590	2	2	3		38455	NADH-ubiquinone oxidoreductase chain 2 OS=Rattus norvegicus OX=10116 GN=ND2 PE=3 SV=1
105	270	tr|Q8HID0|Q8HID0_RAT	39.36	6	6	155590	2	2	3		38653	NADH-ubiquinone oxidoreductase chain 2 OS=Rattus norvegicus OX=10116 GN=Mt-nd2 PE=3 SV=1
105	271	P11662|NU2M_RAT	39.36	6	6	155590	2	2	3		38653	NADH-ubiquinone oxidoreductase chain 2 OS=Rattus norvegicus OX=10116 GN=Mtnd2 PE=3 SV=3
105	272	tr|Q06QH5|Q06QH5_RAT	39.36	6	6	155590	2	2	3		38626	NADH-ubiquinone oxidoreductase chain 2 OS=Rattus norvegicus OX=10116 GN=ND2 PE=3 SV=1
105	273	tr|Q8SEZ7|Q8SEZ7_RAT	39.36	6	6	155590	2	2	3		38580	NADH-ubiquinone oxidoreductase chain 2 (Fragment) OS=Rattus norvegicus OX=10116 GN=NADH2 PE=3 SV=1
105	274	tr|Q06QB0|Q06QB0_RAT	39.36	6	6	155590	2	2	3		38534	NADH-ubiquinone oxidoreductase chain 2 OS=Rattus norvegicus OX=10116 GN=ND2 PE=3 SV=1
105	275	tr|D2E6P4|D2E6P4_RAT	39.36	6	6	155590	2	2	3		38623	NADH-ubiquinone oxidoreductase chain 2 OS=Rattus norvegicus OX=10116 GN=ND2 PE=3 SV=1
105	276	tr|Q06QE9|Q06QE9_RAT	39.36	6	6	155590	2	2	3		38598	NADH-ubiquinone oxidoreductase chain 2 OS=Rattus norvegicus OX=10116 GN=ND2 PE=3 SV=1
92	225	tr|Q8SEZ8|Q8SEZ8_RAT	38.73	7	7	565760	3	3	3	Oxidation (M)	36133	NADH-ubiquinone oxidoreductase chain 1 (Fragment) OS=Rattus norvegicus OX=10116 GN=NADH1 PE=3 SV=1
92	226	P03889|NU1M_RAT	38.73	7	7	565760	3	3	3	Oxidation (M)	36145	NADH-ubiquinone oxidoreductase chain 1 OS=Rattus norvegicus OX=10116 GN=Mtnd1 PE=1 SV=3
92	227	tr|Q8HID1|Q8HID1_RAT	38.73	7	7	565760	3	3	3	Oxidation (M)	36145	NADH-ubiquinone oxidoreductase chain 1 OS=Rattus norvegicus OX=10116 GN=Mt-nd1 PE=3 SV=1
92	228	tr|D2E6L7|D2E6L7_RAT	38.73	7	7	565760	3	3	3	Oxidation (M)	36062	NADH-ubiquinone oxidoreductase chain 1 OS=Rattus norvegicus OX=10116 GN=ND1 PE=3 SV=1
94	322	P12075|COX5B_RAT	37.07	22	22	2183400	3	3	3		13915	Cytochrome c oxidase subunit 5B mitochondrial OS=Rattus norvegicus OX=10116 GN=Cox5b PE=1 SV=2
110	236	tr|Q5U2T0|Q5U2T0_RAT	36.95	3	3	18121	1	1	2		44494	Death associated protein 3 OS=Rattus norvegicus OX=10116 GN=Dap3 PE=2 SV=1
110	237	tr|F7EZZ0|F7EZZ0_RAT	36.95	3	3	18121	1	1	2		45112	Death-associated protein 3 OS=Rattus norvegicus OX=10116 GN=Dap3 PE=1 SV=1
110	242	tr|A0A0G2K264|A0A0G2K264_RAT	36.95	2	2	18121	1	1	2		46666	Death-associated protein 3 OS=Rattus norvegicus OX=10116 GN=Dap3 PE=1 SV=1
139	290	tr|A0A0G2JYU2|A0A0G2JYU2_RAT	36.62	7	7	1293900	2	2	2		20750	Mitochondrial ribosomal protein L11 OS=Rattus norvegicus OX=10116 GN=mrpl11 PE=1 SV=1
139	291	Q5XIE3|RM11_RAT	36.62	7	7	1293900	2	2	2		22420	39S ribosomal protein L11 mitochondrial OS=Rattus norvegicus OX=10116 GN=Mrpl11 PE=2 SV=1
224	314	tr|B1WBP7|B1WBP7_RAT	35.98	8	8	354140	1	1	1		12884	ATP synthase subunit delta mitochondrial OS=Rattus norvegicus OX=10116 GN=Atp5f1d PE=1 SV=1
224	350	tr|G3V7Y3|G3V7Y3_RAT	35.98	6	6	354140	1	1	1		17563	ATP synthase subunit delta mitochondrial OS=Rattus norvegicus OX=10116 GN=Atp5f1d PE=1 SV=1
262	351	Q8VID1|DHRS4_RAT	35.13	3	3	97108	1	1	1		29822	Dehydrogenase/reductase SDR family member 4 OS=Rattus norvegicus OX=10116 GN=Dhrs4 PE=2 SV=2
107	418	Q5XIA8|GHITM_RAT	34.52	3	3	0	2	1	3		37178	Growth hormone-inducible transmembrane protein OS=Rattus norvegicus OX=10116 GN=Ghitm PE=2 SV=1
128	244	P09139|SPYA_RAT	33.48	6	6	32045	2	2	2		45834	Serine--pyruvate aminotransferase mitochondrial OS=Rattus norvegicus OX=10116 GN=Agxt PE=1 SV=1
223	312	tr|D3ZGM1|D3ZGM1_RAT	33.07	1	1	139270	1	1	1		77891	Pentatricopeptide repeat domain 3 OS=Rattus norvegicus OX=10116 GN=Ptcd3 PE=1 SV=1
223	313	tr|A0A0G2JU15|A0A0G2JU15_RAT	33.07	1	1	139270	1	1	1		84557	Pentatricopeptide repeat domain 3 OS=Rattus norvegicus OX=10116 GN=Ptcd3 PE=1 SV=1
221	306	Q2V057|HYPDH_RAT	32.72	2	2	0	1	1	1		51002	Hydroxyproline dehydrogenase OS=Rattus norvegicus OX=10116 GN=Prodh2 PE=2 SV=1
263	353	Q9WUS0|KAD4_RAT	32.43	4	4	0	1	1	1		25203	Adenylate kinase 4 mitochondrial OS=Rattus norvegicus OX=10116 GN=Ak4 PE=2 SV=1
96	383	P42346|MTOR_RAT	32.43	1	1	256540	3	2	3	Formylation	288792	Serine/threonine-protein kinase mTOR OS=Rattus norvegicus OX=10116 GN=Mtor PE=1 SV=1
103	656	tr|D3ZD23|D3ZD23_RAT	32.2	1	1	581970	3	3	3		67300	ATP-binding cassette subfamily E member 1 OS=Rattus norvegicus OX=10116 GN=Abce1 PE=1 SV=1
81	482	tr|D3ZHF8|D3ZHF8_RAT	32.11	1	1	705050	2	1	4	Formylation	73207	Translation factor GUF1 mitochondrial OS=Rattus norvegicus OX=10116 GN=Guf1 PE=1 SV=1
188	253	Q9ER34|ACON_RAT	31.98	3	3	224790	1	1	1		85433	Aconitate hydratase mitochondrial OS=Rattus norvegicus OX=10116 GN=Aco2 PE=1 SV=2
170	235	tr|B2RYW3|B2RYW3_RAT	31.26	7	7	308590	1	1	1	Oxidation (M)	21892	NADH dehydrogenase (Ubiquinone) 1 beta subcomplex 9 OS=Rattus norvegicus OX=10116 GN=Ndufb9 PE=1 SV=1
264	358	P06761|BIP_RAT	31.19	1	1	87757	1	1	1		72347	Endoplasmic reticulum chaperone BiP OS=Rattus norvegicus OX=10116 GN=Hspa5 PE=1 SV=1
230	356	O70600|RSAD2_RAT	30.96	3	3	407170	1	1	1	Formylation	41255	Radical S-adenosyl methionine domain-containing protein 2 OS=Rattus norvegicus OX=10116 GN=Rsad2 PE=1 SV=1
230	357	tr|A0A0H2UHF4|A0A0H2UHF4_RAT	30.96	3	3	407170	1	1	1	Formylation	41444	RCG62278 OS=Rattus norvegicus OX=10116 GN=Rsad2 PE=4 SV=1
142	361	P80433|COX8A_RAT	30.83	14	14	293820	1	1	2		7672	Cytochrome c oxidase subunit 8A mitochondrial OS=Rattus norvegicus OX=10116 GN=Cox8a PE=1 SV=3
144	396	P97521|MCAT_RAT	30.38	4	4		2	0	2		33154	Mitochondrial carnitine/acylcarnitine carrier protein OS=Rattus norvegicus OX=10116 GN=Slc25a20 PE=1 SV=1
144	397	tr|Q66HP8|Q66HP8_RAT	30.38	4	4		2	0	2		33071	Mitochondrial carnitine/acylcarnitine carrier protein OS=Rattus norvegicus OX=10116 GN=Slc25a20 PE=1 SV=1
146	432	tr|F1LSP2|F1LSP2_RAT	30.17	1	1	74977	2	1	2		119190	Acyl-CoA dehydrogenase family member 10 OS=Rattus norvegicus OX=10116 GN=Acad10 PE=1 SV=2
227	321	tr|Q5BJZ3|Q5BJZ3_RAT	29.9	1	1	378270	1	1	1		113869	Nicotinamide nucleotide transhydrogenase OS=Rattus norvegicus OX=10116 GN=Nnt PE=1 SV=1
265	367	tr|D3ZXF8|D3ZXF8_RAT	29.34	5	5	209230	1	1	1		17575	Mitochondrial ribosomal protein L43 OS=Rattus norvegicus OX=10116 GN=Mrpl43 PE=1 SV=3
190	281	tr|F1LPV8|F1LPV8_RAT	28.4	2	2	126180	1	1	1		46639	Succinate--CoA ligase [GDP-forming] subunit beta mitochondrial OS=Rattus norvegicus OX=10116 GN=Suclg2 PE=1 SV=2
190	282	tr|B1H270|B1H270_RAT	28.4	2	2	126180	1	1	1		46988	Succinate--CoA ligase [GDP-forming] subunit beta mitochondrial OS=Rattus norvegicus OX=10116 GN=Suclg2 PE=2 SV=1
266	368	tr|A0A0G2K9B4|A0A0G2K9B4_RAT	28.27	4	4	353540	1	1	1		33652	Mitochondrial ribosomal protein L15 OS=Rattus norvegicus OX=10116 GN=Mrpl15 PE=1 SV=1
131	333	tr|F1LZW6|F1LZW6_RAT	28.18	3	3	97175	2	1	2		54099	Solute carrier family 25 member 13 OS=Rattus norvegicus OX=10116 GN=Slc25a13 PE=1 SV=2
131	448	tr|A0A0G2K2J7|A0A0G2K2J7_RAT	28.18	3	3	97175	2	1	2		41504	Solute carrier family 25 member 12 OS=Rattus norvegicus OX=10116 GN=Slc25a12 PE=1 SV=1
131	456	tr|F1LX07|F1LX07_RAT	28.18	2	2	97175	2	1	2		71917	Solute carrier family 25 member 12 OS=Rattus norvegicus OX=10116 GN=Slc25a12 PE=1 SV=3
172	324	P11497|ACACA_RAT	27.62	0	0	146640	1	1	1		265191	Acetyl-CoA carboxylase 1 OS=Rattus norvegicus OX=10116 GN=Acaca PE=1 SV=1
172	327	tr|A0A0G2K1F2|A0A0G2K1F2_RAT	27.62	0	0	146640	1	1	1		276393	Acetyl-CoA carboxylase beta OS=Rattus norvegicus OX=10116 GN=Acacb PE=1 SV=1
172	328	tr|D3ZBE2|D3ZBE2_RAT	27.62	0	0	146640	1	1	1		275967	Acetyl-CoA carboxylase beta OS=Rattus norvegicus OX=10116 GN=Acacb PE=1 SV=3
172	329	tr|E9PSQ0|E9PSQ0_RAT	27.62	0	0	146640	1	1	1		276255	Acetyl-CoA carboxylase beta OS=Rattus norvegicus OX=10116 GN=Acacb PE=1 SV=2
172	401	tr|A0A0G2K5L6|A0A0G2K5L6_RAT	27.62	0	0	146640	1	1	1		275755	Acetyl-CoA carboxylase beta OS=Rattus norvegicus OX=10116 GN=Acacb PE=1 SV=1
172	402	tr|O70151|O70151_RAT	27.62	0	0	146640	1	1	1		276097	Acetyl-CoA carboxylase OS=Rattus norvegicus OX=10116 GN=Acacb PE=2 SV=1
225	315	P04797|G3P_RAT	27.6	3	3	166120	1	1	1		35828	Glyceraldehyde-3-phosphate dehydrogenase OS=Rattus norvegicus OX=10116 GN=Gapdh PE=1 SV=3
130	307	P16970|ABCD3_RAT	27.15	3	3	344850	2	2	2		75316	ATP-binding cassette sub-family D member 3 OS=Rattus norvegicus OX=10116 GN=Abcd3 PE=1 SV=3
267	369	tr|G3V734|G3V734_RAT	27.11	3	3	223880	1	1	1		36133	2 4-dienoyl CoA reductase 1 mitochondrial isoform CRA_a OS=Rattus norvegicus OX=10116 GN=Decr1 PE=1 SV=1
267	370	Q64591|DECR_RAT	27.11	3	3	223880	1	1	1		36133	2 4-dienoyl-CoA reductase mitochondrial OS=Rattus norvegicus OX=10116 GN=Decr1 PE=1 SV=2
268	371	tr|B5DFA3|B5DFA3_RAT	26.86	2	2	95527	1	1	1		65357	Bucs1 protein OS=Rattus norvegicus OX=10116 GN=Acsm1 PE=2 SV=1
268	372	tr|F1M1W1|F1M1W1_RAT	26.86	2	2	95527	1	1	1		65347	Acyl-coenzyme A synthetase ACSM2 mitochondrial OS=Rattus norvegicus OX=10116 GN=Acsm1 PE=1 SV=3
268	373	tr|A0A0G2K125|A0A0G2K125_RAT	26.86	2	2	95527	1	1	1		65319	Acyl-coenzyme A synthetase ACSM2 mitochondrial OS=Rattus norvegicus OX=10116 GN=Acsm1 PE=1 SV=1
268	374	tr|A0A0G2K8G2|A0A0G2K8G2_RAT	26.86	2	2	95527	1	1	1		70943	Acyl-coenzyme A synthetase ACSM2 mitochondrial OS=Rattus norvegicus OX=10116 GN=Acsm1 PE=1 SV=1
231	375	tr|A0A0G2K2Q2|A0A0G2K2Q2_RAT	26.76	4	4	0	1	1	1		45197	Glycine C-acetyltransferase OS=Rattus norvegicus OX=10116 GN=Gcat PE=1 SV=1
147	480	Q4V8B0|OXR1_RAT	26.65	2	2	72240	2	2	2	Formylation	92810	Oxidation resistance protein 1 OS=Rattus norvegicus OX=10116 GN=Oxr1 PE=1 SV=3
143	377	P80431|COX7B_RAT	26.23	14	14	718110	1	1	2		8995	Cytochrome c oxidase subunit 7B mitochondrial OS=Rattus norvegicus OX=10116 GN=Cox7b PE=1 SV=3
143	378	tr|A0A0G2K6P0|A0A0G2K6P0_RAT	26.23	14	14	718110	1	1	2		9070	Cytochrome c oxidase subunit 7B2 OS=Rattus norvegicus OX=10116 GN=Cox7b2 PE=4 SV=1
269	379	tr|D3ZDP2|D3ZDP2_RAT	26.2	4	4	193190	1	1	1		23470	Mitochondrial ribosomal protein L58 OS=Rattus norvegicus OX=10116 GN=Mrpl58 PE=1 SV=1
108	380	P11530|DMD_RAT	25.47	0	0	1266500	2	2	2		425830	Dystrophin OS=Rattus norvegicus OX=10116 GN=Dmd PE=1 SV=2
270	394	P83565|RM40_RAT	25.39	8	8	131790	1	1	1		24397	39S ribosomal protein L40 mitochondrial OS=Rattus norvegicus OX=10116 GN=Mrpl40 PE=1 SV=2
148	517	tr|F1M4Y5|F1M4Y5_RAT	25.19	1	1	268520	2	2	2	Formylation	108218	Storkhead box 1 OS=Rattus norvegicus OX=10116 GN=Stox1 PE=4 SV=2
145	398	P48037|ANXA6_RAT	25.13	1	1	662730	1	1	2		75754	Annexin A6 OS=Rattus norvegicus OX=10116 GN=Anxa6 PE=1 SV=2
145	399	tr|Q6IMZ3|Q6IMZ3_RAT	25.13	1	1	662730	1	1	2		75756	Annexin OS=Rattus norvegicus OX=10116 GN=Anxa6 PE=1 SV=1
132	349	Q5I0C5|FMT_RAT	25.01	2	2	508290	1	1	2	Formylation	42997	Methionyl-tRNA formyltransferase mitochondrial OS=Rattus norvegicus OX=10116 GN=Mtfmt PE=2 SV=1
274	413	tr|M0RA24|M0RA24_RAT	23.92	7	7	275840	1	1	1		10982	Uncharacterized protein OS=Rattus norvegicus OX=10116 PE=4 SV=2
274	414	tr|D4A4P3|D4A4P3_RAT	23.92	7	7	275840	1	1	1		11267	NADH:ubiquinone oxidoreductase subunit B3 OS=Rattus norvegicus OX=10116 GN=Ndufb3 PE=1 SV=1
229	355	tr|D4AE90|D4AE90_RAT	23.78	2	2	0	1	1	1	Formylation	50113	RCC1-like OS=Rattus norvegicus OX=10116 GN=Rcc1l PE=1 SV=1
273	412	tr|B2GV62|B2GV62_RAT	23.74	7	7	182660	1	1	1		17526	Mitochondrial ribosomal protein L20 OS=Rattus norvegicus OX=10116 GN=Mrpl20 PE=1 SV=1
115	294	Q01728|NAC1_RAT	23.58	1	1	5426300	1	1	2	Formylation	108184	Sodium/calcium exchanger 1 OS=Rattus norvegicus OX=10116 GN=Slc8a1 PE=1 SV=3
115	359	P70549|NAC3_RAT	23.58	1	1	5426300	1	1	2	Formylation	103163	Sodium/calcium exchanger 3 OS=Rattus norvegicus OX=10116 GN=Slc8a3 PE=1 SV=1
133	419	Q01062|PDE2A_RAT	23.4	2	2	511820	1	1	2		104664	cGMP-dependent 3' 5'-cyclic phosphodiesterase OS=Rattus norvegicus OX=10116 GN=Pde2a PE=1 SV=2
133	420	tr|F8WFW5|F8WFW5_RAT	23.4	1	1	511820	1	1	2		105234	Phosphodiesterase OS=Rattus norvegicus OX=10116 GN=Pde2a PE=1 SV=1
275	428	P24473|GSTK1_RAT	23.11	4	4	69690	1	1	1		25493	Glutathione S-transferase kappa 1 OS=Rattus norvegicus OX=10116 GN=Gstk1 PE=1 SV=3
275	429	tr|B6DYQ0|B6DYQ0_RAT	23.11	4	4	69690	1	1	1		25493	Glutathione S-transferase kappa OS=Rattus norvegicus OX=10116 GN=Gstk1 PE=2 SV=1
276	431	D3ZHR2|ABCD1_RAT	22.69	1	1	213020	1	1	1		81938	ATP-binding cassette sub-family D member 1 OS=Rattus norvegicus OX=10116 GN=Abcd1 PE=1 SV=1
278	443	tr|D4A5X7|D4A5X7_RAT	22.3	3	3	85401	1	1	1		41217	Ganglioside-induced differentiation-associated-protein 1 OS=Rattus norvegicus OX=10116 GN=Gdap1 PE=3 SV=1
279	447	tr|D3ZMR9|D3ZMR9_RAT	22	4	4	235380	1	1	1		23390	Mitochondrial ribosomal protein L21 OS=Rattus norvegicus OX=10116 GN=Mrpl21 PE=1 SV=1
232	406	P28494|MA2A1_RAT	21.8	1	1	30652	1	1	1		131242	Alpha-mannosidase 2 OS=Rattus norvegicus OX=10116 GN=Man2a1 PE=1 SV=2
180	407	tr|G3V996|G3V996_RAT	21.06	2	2	89235	1	1	1		41967	LETM1 domain-containing 1 OS=Rattus norvegicus OX=10116 GN=Letmd1 PE=1 SV=1
180	408	tr|B0K026|B0K026_RAT	21.06	2	2	89235	1	1	1		43121	LETM1 domain-containing 1 OS=Rattus norvegicus OX=10116 GN=Letmd1 PE=1 SV=1
282	520	tr|A0A0G2K1N9|A0A0G2K1N9_RAT	20.67	1	1	120820	1	1	1		74235	Selenoprotein O OS=Rattus norvegicus OX=10116 GN=Selenoo PE=1 SV=1
282	521	tr|B2GVA1|B2GVA1_RAT	20.67	1	1	120820	1	1	1		74385	Selenoprotein O OS=Rattus norvegicus OX=10116 GN=Selenoo PE=2 SV=1

## Sheet: RLM SM-BM PTP I-III(2)-IV(L)
Protein Group	Protein ID	Accession	-10lgP	Coverage (%)	Coverage (%) Sample 2	IBAQ	#Peptides	#Unique	#Spec Sample 2	PTM	Avg. Mass	Description
1	1	P10860|DHE3_RAT	360.33	52	52	365140000	151	150	327	Carbamidomethylation		Glutamate dehydrogenase 1, mitochondrial
11	38	tr|D3ZFQ8|D3ZFQ8_RAT	260.23	22	22	30541000	27	27	49	Oxidation (M)	35435	Cytochrome c-1 OS=Rattus norvegicus OX=10116 GN=Cyc1 PE=1 SV=3
17	49	tr|B2RYS8|B2RYS8_RAT	255.9	39	39	25684000	27	27	44	Oxidation (M)	21959	NADH dehydrogenase [ubiquinone] 1 beta subcomplex subunit 8 mitochondrial OS=Rattus norvegicus OX=10116 GN=Ndufb8 PE=1 SV=1
5	16	Q68FY0|QCR1_RAT	250.22	28	28	64675000	46	45	83	Carbamidomethylation	52849	Cytochrome b-c1 complex subunit 1 mitochondrial OS=Rattus norvegicus OX=10116 GN=Uqcrc1 PE=1 SV=1
10	8	P10719|ATPB_RAT	248.87	19	19	28670000	30	29	50	Oxidation (M)	56354	ATP synthase subunit beta mitochondrial OS=Rattus norvegicus OX=10116 GN=Atp5f1b PE=1 SV=2
10	9	tr|G3V6D3|G3V6D3_RAT	248.87	19	19	28670000	30	29	50	Oxidation (M)	56345	ATP synthase subunit beta OS=Rattus norvegicus OX=10116 GN=Atp5f1b PE=1 SV=1
18	42	P20788|UCRI_RAT	247.71	29	29	29501000	25	25	43		29446	Cytochrome b-c1 complex subunit Rieske mitochondrial OS=Rattus norvegicus OX=10116 GN=Uqcrfs1 PE=1 SV=2
2	20	P19234|NDUV2_RAT	247.46	37	37	66614000	36	36	95		27378	NADH dehydrogenase [ubiquinone] flavoprotein 2 mitochondrial OS=Rattus norvegicus OX=10116 GN=Ndufv2 PE=1 SV=2
4	13	Q66HF1|NDUS1_RAT	240.07	26	26	48532000	55	55	85	Oxidation (M)	79412	NADH-ubiquinone oxidoreductase 75 kDa subunit mitochondrial OS=Rattus norvegicus OX=10116 GN=Ndufs1 PE=1 SV=1
7	19	Q641Y2|NDUS2_RAT	231.78	31	31	37625000	42	41	72	Oxidation (M)	52562	NADH dehydrogenase [ubiquinone] iron-sulfur protein 2 mitochondrial OS=Rattus norvegicus OX=10116 GN=Ndufs2 PE=1 SV=1
14	3	P85834|EFTU_RAT	216.92	19	19	17505000	23	21	46		49522	Elongation factor Tu mitochondrial OS=Rattus norvegicus OX=10116 GN=Tufm PE=1 SV=1
22	58	tr|D4A565|D4A565_RAT	216.37	38	38	19079000	20	20	33		21664	NADH dehydrogenase (Ubiquinone) 1 beta subcomplex 5 (Predicted) isoform CRA_b OS=Rattus norvegicus OX=10116 GN=Ndufb5 PE=1 SV=1
9	67	tr|L0L4L8|L0L4L8_RAT	215.68	23	23	3589700	27	1	51		42470	Cytochrome b (Fragment) OS=Rattus norvegicus OX=10116 GN=cytb PE=3 SV=1
9	68	tr|A0A140GE10|A0A140GE10_RAT	215.68	23	23	3589700	27	1	51		42574	Cytochrome b (Fragment) OS=Rattus norvegicus OX=10116 PE=3 SV=1
9	69	tr|A0A140GE11|A0A140GE11_RAT	215.68	23	23	3589700	27	1	51		42588	Cytochrome b (Fragment) OS=Rattus norvegicus OX=10116 PE=3 SV=1
9	125	tr|A0A385HCC9|A0A385HCC9_RAT	215.68	23	23	3589700	27	1	51		42766	Cytochrome b (Fragment) OS=Rattus norvegicus OX=10116 PE=3 SV=1
9	71	tr|A0A3Q8AGE8|A0A3Q8AGE8_RAT	215.68	23	23	3589700	27	1	51		42712	Cytochrome b (Fragment) OS=Rattus norvegicus OX=10116 GN=Cytb PE=3 SV=1
9	72	tr|A0A3Q8AC68|A0A3Q8AC68_RAT	215.68	23	23	3589700	27	1	51		42622	Cytochrome b (Fragment) OS=Rattus norvegicus OX=10116 GN=Cytb PE=3 SV=1
9	74	tr|A0A3S6FM15|A0A3S6FM15_RAT	215.68	23	23	3589700	27	1	51		42698	Cytochrome b (Fragment) OS=Rattus norvegicus OX=10116 GN=Cytb PE=3 SV=1
9	76	tr|A0A220D9Z6|A0A220D9Z6_RAT	215.68	23	23	3589700	27	1	51		43018	Cytochrome b OS=Rattus norvegicus OX=10116 PE=3 SV=1
9	77	tr|D6NSP2|D6NSP2_RAT	215.68	23	23	3589700	27	1	51		42945	Cytochrome b (Fragment) OS=Rattus norvegicus OX=10116 GN=cytb PE=3 SV=1
9	78	tr|D6NSS6|D6NSS6_RAT	215.68	23	23	3589700	27	1	51		42993	Cytochrome b (Fragment) OS=Rattus norvegicus OX=10116 GN=cytb PE=3 SV=1
9	79	tr|D6NSQ3|D6NSQ3_RAT	215.68	23	23	3589700	27	1	51		43012	Cytochrome b (Fragment) OS=Rattus norvegicus OX=10116 GN=cytb PE=3 SV=1
9	80	tr|D6NSR3|D6NSR3_RAT	215.68	23	23	3589700	27	1	51		42986	Cytochrome b (Fragment) OS=Rattus norvegicus OX=10116 GN=cytb PE=3 SV=1
9	82	tr|D6NSR8|D6NSR8_RAT	215.68	23	23	3589700	27	1	51		42998	Cytochrome b (Fragment) OS=Rattus norvegicus OX=10116 GN=cytb PE=3 SV=1
9	84	tr|A0A0A1FZ42|A0A0A1FZ42_RAT	215.68	23	23	3589700	27	1	51		42989	Cytochrome b OS=Rattus norvegicus OX=10116 GN=CYTB PE=3 SV=1
9	85	tr|D6NSS7|D6NSS7_RAT	215.68	23	23	3589700	27	1	51		42948	Cytochrome b (Fragment) OS=Rattus norvegicus OX=10116 GN=cytb PE=3 SV=1
9	86	tr|Q8SEY9|Q8SEY9_RAT	215.68	23	23	3589700	27	1	51		43015	Cytochrome b OS=Rattus norvegicus OX=10116 GN=cytb PE=3 SV=1
9	87	tr|D6NSR7|D6NSR7_RAT	215.68	23	23	3589700	27	1	51		42982	Cytochrome b (Fragment) OS=Rattus norvegicus OX=10116 GN=cytb PE=3 SV=1
9	88	tr|A0A220DA44|A0A220DA44_RAT	215.68	23	23	3589700	27	1	51		42968	Cytochrome b OS=Rattus norvegicus OX=10116 PE=3 SV=1
9	116	tr|D6NSQ0|D6NSQ0_RAT	215.68	23	23	3589700	27	1	51		42968	Cytochrome b (Fragment) OS=Rattus norvegicus OX=10116 GN=cytb PE=3 SV=1
9	91	tr|Q5UAI7|Q5UAI7_RAT	215.68	23	23	3589700	27	1	51		42998	Cytochrome b OS=Rattus norvegicus OX=10116 GN=CYTB PE=3 SV=1
9	128	tr|D6NSR2|D6NSR2_RAT	215.68	23	23	3589700	27	1	51		43073	Cytochrome b (Fragment) OS=Rattus norvegicus OX=10116 GN=cytb PE=3 SV=1
9	92	tr|A0A0S1Z1V9|A0A0S1Z1V9_RAT	215.68	23	23	3589700	27	1	51		43002	Cytochrome b OS=Rattus norvegicus OX=10116 GN=CYTB PE=3 SV=1
9	93	tr|Q8HIC4|Q8HIC4_RAT	215.68	23	23	3589700	27	1	51		43012	Cytochrome b OS=Rattus norvegicus OX=10116 GN=Mt-cyb PE=3 SV=1
9	94	tr|A0A220DA02|A0A220DA02_RAT	215.68	23	23	3589700	27	1	51		42968	Cytochrome b OS=Rattus norvegicus OX=10116 PE=3 SV=1
9	95	tr|A0A0S1Z1V4|A0A0S1Z1V4_RAT	215.68	23	23	3589700	27	1	51		43016	Cytochrome b OS=Rattus norvegicus OX=10116 GN=CYTB PE=3 SV=1
9	96	tr|R9TKN1|R9TKN1_RAT	215.68	23	23	3589700	27	1	51		43012	Cytochrome b OS=Rattus norvegicus OX=10116 GN=CYTB PE=3 SV=1
9	97	P00159|CYB_RAT	215.68	23	23	3589700	27	1	51		43012	Cytochrome b OS=Rattus norvegicus OX=10116 GN=Mt-Cyb PE=3 SV=3
9	98	tr|L0N311|L0N311_RAT	215.68	23	23	3589700	27	1	51		43045	Cytochrome b (Fragment) OS=Rattus norvegicus OX=10116 GN=cytb PE=3 SV=1
9	99	tr|A0A220DA28|A0A220DA28_RAT	215.68	23	23	3589700	27	1	51		42970	Cytochrome b OS=Rattus norvegicus OX=10116 PE=3 SV=1
9	100	tr|H2KXA0|H2KXA0_RAT	215.68	23	23	3589700	27	1	51		42978	Cytochrome b (Fragment) OS=Rattus norvegicus OX=10116 GN=cytb PE=3 SV=1
9	101	tr|A0A096XNM4|A0A096XNM4_RAT	215.68	23	23	3589700	27	1	51		43042	Cytochrome b (Fragment) OS=Rattus norvegicus OX=10116 PE=3 SV=1
9	102	tr|D6NSP5|D6NSP5_RAT	215.68	23	23	3589700	27	1	51		43012	Cytochrome b (Fragment) OS=Rattus norvegicus OX=10116 GN=cytb PE=3 SV=1
9	124	tr|A0A411P2K0|A0A411P2K0_RAT	215.68	23	23	3589700	27	1	51		42238	Cytochrome b (Fragment) OS=Rattus norvegicus OX=10116 GN=Cytb PE=3 SV=1
9	127	tr|D6NSP4|D6NSP4_RAT	215.68	23	23	3589700	27	1	51		43016	Cytochrome b (Fragment) OS=Rattus norvegicus OX=10116 GN=cytb PE=3 SV=1
9	129	tr|D6NSR1|D6NSR1_RAT	215.68	23	23	3589700	27	1	51		43002	Cytochrome b (Fragment) OS=Rattus norvegicus OX=10116 GN=cytb PE=3 SV=1
12	126	tr|A0A385HC93|A0A385HC93_RAT	206.71	23	23	326760	27	1	48		42751	Cytochrome b (Fragment) OS=Rattus norvegicus OX=10116 PE=3 SV=1
6	4	P07756|CPSM_RAT	205.76	17	17	21749000	48	48	75	Carbamidomethylation		Carbamoyl-phosphate synthase [ammonia], mitochondrial
8	7	Q5BK63|NDUA9_RAT	201.23	32	32	17304000	32	31	57		42559	NADH dehydrogenase [ubiquinone] 1 alpha subcomplex subunit 9 mitochondrial OS=Rattus norvegicus OX=10116 GN=Ndufa9 PE=1 SV=2
20	204	tr|Q5PQZ9|Q5PQZ9_RAT	196.91	45	45	23599000	18	18	38		14359	NADH dehydrogenase [ubiquinone] 1 subunit C2 OS=Rattus norvegicus OX=10116 GN=Ndufc2 PE=1 SV=1
21	30	P52873|PYC_RAT	194.27	15	15	5766700	28	27	36		129777	Pyruvate carboxylase mitochondrial OS=Rattus norvegicus OX=10116 GN=Pc PE=1 SV=2
21	31	tr|A0A0G2JTL5|A0A0G2JTL5_RAT	194.27	13	13	5766700	28	27	36		140005	Pyruvate carboxylase mitochondrial OS=Rattus norvegicus OX=10116 GN=Pc PE=1 SV=1
19	34	tr|A0A0G2JVL6|A0A0G2JVL6_RAT	191.93	28	28	20038000	17	17	40		19965	NADH dehydrogenase [ubiquinone] 1 alpha subcomplex subunit 8 OS=Rattus norvegicus OX=10116 GN=Ndufa8 PE=1 SV=1
26	26	P00507|AATM_RAT	191.31	21	21	12199000	19	19	29	Oxidation (M)	47314	Aspartate aminotransferase mitochondrial OS=Rattus norvegicus OX=10116 GN=Got2 PE=1 SV=2
16	57	Q561S0|NDUAA_RAT	190.22	30	30	15631000	26	25	44	Oxidation (M)	40493	NADH dehydrogenase [ubiquinone] 1 alpha subcomplex subunit 10 mitochondrial OS=Rattus norvegicus OX=10116 GN=Ndufa10 PE=1 SV=1
13	10	P15999|ATPA_RAT	185.56	24	24	21199000	32	30	47	Oxidation (M)	59754	ATP synthase subunit alpha mitochondrial OS=Rattus norvegicus OX=10116 GN=Atp5f1a PE=1 SV=2
13	11	tr|F1LP05|F1LP05_RAT	185.56	24	24	21199000	32	30	47	Oxidation (M)	59813	ATP synthase subunit alpha OS=Rattus norvegicus OX=10116 GN=Atp5f1a PE=1 SV=1
38	136	P24329|THTR_RAT	182.97	20	20	2352500	9	9	14		33407	Thiosulfate sulfurtransferase OS=Rattus norvegicus OX=10116 GN=Tst PE=1 SV=3
3	21	P32551|QCR2_RAT	178.29	24	24	45793000	32	31	92	Carbamidomethylation		Cytochrome b-c1 complex subunit 2, mitochondrial
15	28	tr|D3ZG43|D3ZG43_RAT	176.38	34	34	29823000	25	25	45		30226	NADH dehydrogenase (Ubiquinone) Fe-S protein 3 (Predicted) isoform CRA_c OS=Rattus norvegicus OX=10116 GN=Ndufs3 PE=1 SV=1
24	48	tr|D3ZF13|D3ZF13_RAT	174.41	28	28	19750000	17	17	30		17514	Acyl carrier protein OS=Rattus norvegicus OX=10116 GN=Ndufab1 PE=1 SV=1
28	182	tr|Q06QG6|Q06QG6_RAT	173.92	12	12	11323000	17	17	24	Oxidation (M)	68588	NADH-ubiquinone oxidoreductase chain 5 OS=Rattus norvegicus OX=10116 GN=ND5 PE=3 SV=1
28	183	tr|Q06QK5|Q06QK5_RAT	173.92	12	12	11323000	17	17	24	Oxidation (M)	68606	NADH-ubiquinone oxidoreductase chain 5 OS=Rattus norvegicus OX=10116 GN=ND5 PE=3 SV=1
28	184	P11661|NU5M_RAT	173.92	12	12	11323000	17	17	24	Oxidation (M)	68618	NADH-ubiquinone oxidoreductase chain 5 OS=Rattus norvegicus OX=10116 GN=Mtnd5 PE=3 SV=3
28	185	tr|Q06QA1|Q06QA1_RAT	173.92	12	12	11323000	17	17	24	Oxidation (M)	68574	NADH-ubiquinone oxidoreductase chain 5 OS=Rattus norvegicus OX=10116 GN=ND5 PE=3 SV=1
28	186	tr|Q8SEZ0|Q8SEZ0_RAT	173.92	12	12	11323000	17	17	24	Oxidation (M)	68618	NADH-ubiquinone oxidoreductase chain 5 OS=Rattus norvegicus OX=10116 GN=Mt-nd5 PE=3 SV=1
28	187	tr|A0A096XKT9|A0A096XKT9_RAT	173.92	12	12	11323000	17	17	24	Oxidation (M)	68584	NADH-ubiquinone oxidoreductase chain 5 OS=Rattus norvegicus OX=10116 GN=ND5 PE=3 SV=1
46	249	tr|F1LXA0|F1LXA0_RAT	173.16	28	28	7575400	8	8	12	Oxidation (M)	17178	NADH dehydrogenase [ubiquinone] 1 alpha subcomplex subunit 12 OS=Rattus norvegicus OX=10116 GN=Ndufa12 PE=1 SV=2
23	15	P67779|PHB_RAT	171.76	26	26	9574400	20	19	31		29820	Prohibitin OS=Rattus norvegicus OX=10116 GN=Phb PE=1 SV=1
29	41	tr|D4A3V2|D4A3V2_RAT	169.52	34	34	8569100	16	16	24		15224	NADH dehydrogenase [ubiquinone] 1 alpha subcomplex subunit 6 OS=Rattus norvegicus OX=10116 GN=Ndufa6 PE=1 SV=1
35	137	tr|D4A7L4|D4A7L4_RAT	164.06	23	23	13760000	9	9	15		17634	NADH dehydrogenase (Ubiquinone) 1 beta subcomplex 11 (Predicted) OS=Rattus norvegicus OX=10116 GN=Ndufb11 PE=1 SV=1
32	181	Q80W89|NDUAB_RAT	163.87	18	18	9784800	9	9	17		14854	NADH dehydrogenase [ubiquinone] 1 alpha subcomplex subunit 11 OS=Rattus norvegicus OX=10116 GN=Ndufa11 PE=2 SV=1
30	66	tr|D4A0T0|D4A0T0_RAT	159.46	38	38	23577000	13	13	23		20859	NADH:ubiquinone oxidoreductase subunit B10 OS=Rattus norvegicus OX=10116 GN=Ndufb10 PE=1 SV=1
27	55	tr|B0BNE6|B0BNE6_RAT	151.31	26	26	7918100	19	18	26		23970	NADH dehydrogenase (Ubiquinone) Fe-S protein 8 (Predicted) isoform CRA_a OS=Rattus norvegicus OX=10116 GN=Ndufs8 PE=1 SV=1
25	43	tr|Q5XIH3|Q5XIH3_RAT	144.68	19	19	24028000	15	15	30	Oxidation (M)	50731	NADH dehydrogenase [ubiquinone] flavoprotein 1 mitochondrial OS=Rattus norvegicus OX=10116 GN=Ndufv1 PE=1 SV=1
34	245	tr|A9UMV9|A9UMV9_RAT	144.28	30	30	15070000	8	8	16	Oxidation (M)	12500	NADH:ubiquinone oxidoreductase subunit A7 OS=Rattus norvegicus OX=10116 GN=Ndufa7 PE=1 SV=1
49	142	tr|D3ZCZ9|D3ZCZ9_RAT	140.5	31	31	5005100	6	6	11		13040	NADH dehydrogenase [ubiquinone] iron-sulfur protein 6 mitochondrial OS=Rattus norvegicus OX=10116 GN=LOC100912599 PE=1 SV=1
48	138	Q5XIF3|NDUS4_RAT	138.6	15	15	5650500	7	7	11		19741	NADH dehydrogenase [ubiquinone] iron-sulfur protein 4 mitochondrial OS=Rattus norvegicus OX=10116 GN=Ndufs4 PE=1 SV=1
44	35	P17764|THIL_RAT	136.01	10	10	3917400	9	9	12		44695	Acetyl-CoA acetyltransferase mitochondrial OS=Rattus norvegicus OX=10116 GN=Acat1 PE=1 SV=1
40	65	tr|D3ZE15|D3ZE15_RAT	134.46	35	35	3462000	9	8	13	Oxidation (M)	16777	NADH:ubiquinone oxidoreductase subunit A13 OS=Rattus norvegicus OX=10116 GN=Ndufa13 PE=1 SV=1
56	63	tr|Q6QI09|Q6QI09_RAT	130.8	7	7	2863100	8	8	9		67721	ATP synthase subunit gamma mitochondrial OS=Rattus norvegicus OX=10116 GN=Taf3 PE=1 SV=1
51	145	tr|F1LPG5|F1LPG5_RAT	129.82	21	21	5738500	7	7	11		15064	NADH:ubiquinone oxidoreductase subunit B4 OS=Rattus norvegicus OX=10116 GN=Ndufb4 PE=1 SV=1
51	157	tr|F1M7T1|F1M7T1_RAT	129.82	21	21	5738500	7	7	11		15160	NADH dehydrogenase (ubiquinone) 1 beta subcomplex 4 OS=Rattus norvegicus OX=10116 GN=LOC100361934 PE=4 SV=2
47	338	Q5M9I5|QCR6_RAT	129.8	21	21	12381000	5	5	12		10424	Cytochrome b-c1 complex subunit 6 mitochondrial OS=Rattus norvegicus OX=10116 GN=Uqcrh PE=3 SV=1
37	27	Q60587|ECHB_RAT	128.86	12	12	2512900	11	11	14		51414	Trifunctional enzyme subunit beta mitochondrial OS=Rattus norvegicus OX=10116 GN=Hadhb PE=1 SV=1
37	29	tr|A0A0G2K330|A0A0G2K330_RAT	128.86	12	12	2512900	11	11	14		52568	Trifunctional enzyme subunit beta mitochondrial OS=Rattus norvegicus OX=10116 GN=Hadhb PE=1 SV=1
60	258	tr|M0RB63|M0RB63_RAT	127.66	48	48	4364300	5	5	8	Oxidation (M)	9372	RCG63041 OS=Rattus norvegicus OX=10116 GN=LOC684509 PE=4 SV=1
60	257	tr|A9UMW2|A9UMW2_RAT	127.66	48	48	4364300	5	5	8	Oxidation (M)	9255	Ndufa3 protein (Fragment) OS=Rattus norvegicus OX=10116 GN=Ndufa3 PE=2 SV=1
60	259	tr|A0A0G2KAA3|A0A0G2KAA3_RAT	127.66	44	44	4364300	5	5	8	Oxidation (M)	10170	NADH:ubiquinone oxidoreductase subunit A3 OS=Rattus norvegicus OX=10116 GN=Ndufa3 PE=1 SV=1
36	24	Q64428|ECHA_RAT	126.44	9	9	4426400	9	9	14	Carbamidomethylation	82665	Trifunctional enzyme subunit alpha mitochondrial OS=Rattus norvegicus OX=10116 GN=Hadha PE=1 SV=2
33	135	tr|D3ZZ21|D3ZZ21_RAT	125.1	37	37	5808400	10	9	16	Oxidation (M)	15638	NADH dehydrogenase (Ubiquinone) 1 beta subcomplex 6 (Predicted) OS=Rattus norvegicus OX=10116 GN=Ndufb6 PE=1 SV=1
39	17	tr|A0A0G2KB63|A0A0G2KB63_RAT	119.52	15	15	7553700	10	9	14		33168	Prohibitin OS=Rattus norvegicus OX=10116 GN=Phb2 PE=1 SV=1
39	12	Q5XIH7|PHB2_RAT	119.52	15	15	7553700	10	9	14		33312	Prohibitin-2 OS=Rattus norvegicus OX=10116 GN=Phb2 PE=1 SV=1
58	194	tr|Q5RJN0|Q5RJN0_RAT	116.63	19	19	1387700	8	8	8	Oxidation (M)	23945	NADH dehydrogenase (Ubiquinone) Fe-S protein 7 OS=Rattus norvegicus OX=10116 GN=Ndufs7 PE=1 SV=1
45	45	P04762|CATA_RAT	112.9	10	10	1944100	9	9	12		59757	Catalase OS=Rattus norvegicus OX=10116 GN=Cat PE=1 SV=3
65	32	P07895|SODM_RAT	112.56	12	12	2030200	4	4	7		24674	Superoxide dismutase [Mn] mitochondrial OS=Rattus norvegicus OX=10116 GN=Sod2 PE=1 SV=2
62	198	tr|B5DEL8|B5DEL8_RAT	112.53	21	21	2937900	5	5	8	Carbamidomethylation	12700	NADH dehydrogenase (Ubiquinone) Fe-S protein 5 OS=Rattus norvegicus OX=10116 GN=Ndufs5 PE=1 SV=1
55	346	tr|D3ZS58|D3ZS58_RAT	112.17	11	11	5294200	4	4	10		10845	NADH dehydrogenase [ubiquinone] 1 alpha subcomplex subunit 2 OS=Rattus norvegicus OX=10116 GN=Ndufa2 PE=1 SV=1
42	23	P22791|HMCS2_RAT	111.6	12	12	1668500	11	11	13	Carbamidomethylation		Hydroxymethylglutaryl-CoA synthase, mitochondrial
42	22	tr|Q68G44|Q68G44_RAT	111.6	12	12	1668500	11	11	13	Carbamidomethylation		Hydroxymethylglutaryl-CoA synthase, mitochondrial
61	119	P31399|ATP5H_RAT	110.27	21	21	2178500	5	5	8		18763	ATP synthase subunit d mitochondrial OS=Rattus norvegicus OX=10116 GN=Atp5pd PE=1 SV=3
41	171	tr|D3ZFJ6|D3ZFJ6_RAT	109.77	16	16	2589400	9	9	13		60420	Lactamase beta OS=Rattus norvegicus OX=10116 GN=Lactb PE=1 SV=1
64	5783	tr|Q35733|Q35733_RAT	104.7	14	14	1046000	7	7	8		8389	NADH-ubiquinone oxidoreductase chain 6 (Fragment) OS=Rattus norvegicus OX=10116 PE=3 SV=1
64	5784	tr|Q06QD9|Q06QD9_RAT	104.7	6	6	1046000	7	7	8		18943	NADH-ubiquinone oxidoreductase chain 6 OS=Rattus norvegicus OX=10116 GN=ND6 PE=3 SV=1
64	5785	tr|Q7HKW2|Q7HKW2_RAT	104.7	6	6	1046000	7	7	8		18957	NADH-ubiquinone oxidoreductase chain 6 OS=Rattus norvegicus OX=10116 GN=NADH6 PE=3 SV=1
52	2	tr|B2GV15|B2GV15_RAT	104.24	11	11	2426200	6	6	10		53274	Dihydrolipoamide acetyltransferase component of pyruvate dehydrogenase complex OS=Rattus norvegicus OX=10116 GN=Dbt PE=1 SV=1
31	225	tr|Q8SEZ8|Q8SEZ8_RAT	102.51	17	17	4349600	12	12	17	Oxidation (M)	36133	NADH-ubiquinone oxidoreductase chain 1 (Fragment) OS=Rattus norvegicus OX=10116 GN=NADH1 PE=3 SV=1
31	226	P03889|NU1M_RAT	102.51	17	17	4349600	12	12	17	Oxidation (M)	36145	NADH-ubiquinone oxidoreductase chain 1 OS=Rattus norvegicus OX=10116 GN=Mtnd1 PE=1 SV=3
31	227	tr|Q8HID1|Q8HID1_RAT	102.51	17	17	4349600	12	12	17	Oxidation (M)	36145	NADH-ubiquinone oxidoreductase chain 1 OS=Rattus norvegicus OX=10116 GN=Mt-nd1 PE=3 SV=1
31	228	tr|D2E6L7|D2E6L7_RAT	102.51	17	17	4349600	12	12	17	Oxidation (M)	36062	NADH-ubiquinone oxidoreductase chain 1 OS=Rattus norvegicus OX=10116 GN=ND1 PE=3 SV=1
59	46	P13086|SUCA_RAT	99.25	8	8	591800	5	5	8		36148	Succinate--CoA ligase [ADP/GDP-forming] subunit alpha mitochondrial OS=Rattus norvegicus OX=10116 GN=Suclg1 PE=2 SV=2
59	47	tr|A0A0H2UHE1|A0A0H2UHE1_RAT	99.25	7	7	591800	5	5	8		37560	Succinate--CoA ligase [ADP/GDP-forming] subunit alpha mitochondrial OS=Rattus norvegicus OX=10116 GN=Suclg1 PE=1 SV=1
84	6	Q01205|ODO2_RAT	95.82	8	8	558130	3	3	3		48925	Dihydrolipoyllysine-residue succinyltransferase component of 2-oxoglutarate dehydrogenase complex mitochondrial OS=Rattus norvegicus OX=10116 GN=Dlst PE=1 SV=2
84	5	tr|G3V6P2|G3V6P2_RAT	95.82	8	8	558130	3	3	3		48899	Dihydrolipoamide S-succinyltransferase (E2 component of 2-oxo-glutarate complex) isoform CRA_a OS=Rattus norvegicus OX=10116 GN=Dlst PE=1 SV=1
74	115	tr|A0A0G2JVH4|A0A0G2JVH4_RAT	90.57	3	3	684790	4	4	4		86230	MICOS complex subunit MIC60 OS=Rattus norvegicus OX=10116 GN=Immt PE=1 SV=1
74	109	tr|A0A140TAG5|A0A140TAG5_RAT	90.57	4	4	684790	4	4	4		67049	MICOS complex subunit MIC60 OS=Rattus norvegicus OX=10116 GN=Immt PE=1 SV=1
74	110	Q3KR86|MIC60_RAT	90.57	4	4	684790	4	4	4		67177	MICOS complex subunit Mic60 (Fragment) OS=Rattus norvegicus OX=10116 GN=Immt PE=1 SV=1
50	133	Q63362|NDUA5_RAT	88.02	30	30	1229100	8	8	11	Carbamidomethylation	13412	NADH dehydrogenase [ubiquinone] 1 alpha subcomplex subunit 5 OS=Rattus norvegicus OX=10116 GN=Ndufa5 PE=1 SV=3
75	5779	tr|D3ZYT2|D3ZYT2_RAT	85.53	3	3	529150	2	2	4		48136	Mitochondrial ribosomal protein S5 OS=Rattus norvegicus OX=10116 GN=Mrps5 PE=1 SV=1
111	277	tr|B2RZ24|B2RZ24_RAT	84.12	4	4	339630	2	2	2		47388	Succinate-CoA ligase subunit beta (Fragment) OS=Rattus norvegicus OX=10116 GN=Sucla2 PE=2 SV=1
111	278	tr|F1LM47|F1LM47_RAT	84.12	3	3	339630	2	2	2		50306	Succinate--CoA ligase [ADP-forming] subunit beta mitochondrial OS=Rattus norvegicus OX=10116 GN=Sucla2 PE=1 SV=1
72	385	Q5U2U0|CLPX_RAT	81.44	5	5	244040	3	3	4		69208	ATP-dependent Clp protease ATP-binding subunit clpX-like mitochondrial OS=Rattus norvegicus OX=10116 GN=Clpx PE=2 SV=1
63	50	Q02253|MMSA_RAT	81.16	9	9	688710	7	7	8	Oxidation (M)	57808	Methylmalonate-semialdehyde dehydrogenase [acylating] mitochondrial OS=Rattus norvegicus OX=10116 GN=Aldh6a1 PE=1 SV=1
63	51	tr|G3V7J0|G3V7J0_RAT	81.16	9	9	688710	7	7	8	Oxidation (M)	57748	Aldehyde dehydrogenase family 6 subfamily A1 isoform CRA_b OS=Rattus norvegicus OX=10116 GN=Aldh6a1 PE=1 SV=1
43	147	P05508|NU4M_RAT	78.18	8	8	2125300	7	7	12	Oxidation (M)		NADH-ubiquinone oxidoreductase chain 4
43	148	tr|D2E6K0|D2E6K0_RAT	78.18	8	8	2125300	7	7	12	Oxidation (M)
43	149	tr|A7XYB9|A7XYB9_RAT	78.18	8	8	2125300	7	7	12	Oxidation (M)
43	150	tr|Q06QE1|Q06QE1_RAT	78.18	8	8	2125300	7	7	12	Oxidation (M)
43	151	tr|Q06QA2|Q06QA2_RAT	78.18	8	8	2125300	7	7	12	Oxidation (M)
43	152	tr|Q7HKW3|Q7HKW3_RAT	78.18	8	8	2125300	7	7	12	Oxidation (M)
43	153	tr|Q06QG7|Q06QG7_RAT	78.18	8	8	2125300	7	7	12	Oxidation (M)
43	154	tr|Q06Q89|Q06Q89_RAT	78.18	8	8	2125300	7	7	12	Oxidation (M)
43	155	tr|Q35737|Q35737_RAT	78.18	8	8	2125300	7	7	12	Oxidation (M)
43	156	tr|Q8HIC6|Q8HIC6_RAT	78.18	8	8	2125300	7	7	12	Oxidation (M)
78	52	tr|M0RAM5|M0RAM5_RAT	77.53	18	18	581950	4	4	4		22155	Glutathione peroxidase OS=Rattus norvegicus OX=10116 GN=Gpx1 PE=1 SV=1
78	53	P04041|GPX1_RAT	77.53	18	18	581950	4	4	4		22305	Glutathione peroxidase 1 OS=Rattus norvegicus OX=10116 GN=Gpx1 PE=1 SV=4
69	54	P18163|ACSL1_RAT	77.48	4	4	919270	3	2	6		78179	Long-chain-fatty-acid--CoA ligase 1 OS=Rattus norvegicus OX=10116 GN=Acsl1 PE=1 SV=1
67	207	tr|G3V6I4|G3V6I4_RAT	75.45	10	10	272060	4	4	6		37791	Mitochondrial amidoxime reducing component 1 OS=Rattus norvegicus OX=10116 GN=Marc1 PE=1 SV=1
66	267	tr|Q06Q97|Q06Q97_RAT	73.13	8	8	614970	5	5	7		38485	NADH-ubiquinone oxidoreductase chain 2 OS=Rattus norvegicus OX=10116 GN=ND2 PE=3 SV=1
66	268	tr|A0A0A1G491|A0A0A1G491_RAT	73.13	8	8	614970	5	5	7		38542	NADH-ubiquinone oxidoreductase chain 2 OS=Rattus norvegicus OX=10116 GN=ND2 PE=3 SV=1
66	269	tr|Q5UAJ8|Q5UAJ8_RAT	73.13	8	8	614970	5	5	7		38455	NADH-ubiquinone oxidoreductase chain 2 OS=Rattus norvegicus OX=10116 GN=ND2 PE=3 SV=1
66	270	tr|Q8HID0|Q8HID0_RAT	73.13	8	8	614970	5	5	7		38653	NADH-ubiquinone oxidoreductase chain 2 OS=Rattus norvegicus OX=10116 GN=Mt-nd2 PE=3 SV=1
66	271	P11662|NU2M_RAT	73.13	8	8	614970	5	5	7		38653	NADH-ubiquinone oxidoreductase chain 2 OS=Rattus norvegicus OX=10116 GN=Mtnd2 PE=3 SV=3
66	272	tr|Q06QH5|Q06QH5_RAT	73.13	8	8	614970	5	5	7		38626	NADH-ubiquinone oxidoreductase chain 2 OS=Rattus norvegicus OX=10116 GN=ND2 PE=3 SV=1
66	274	tr|Q06QB0|Q06QB0_RAT	73.13	8	8	614970	5	5	7		38534	NADH-ubiquinone oxidoreductase chain 2 OS=Rattus norvegicus OX=10116 GN=ND2 PE=3 SV=1
66	275	tr|D2E6P4|D2E6P4_RAT	73.13	8	8	614970	5	5	7		38623	NADH-ubiquinone oxidoreductase chain 2 OS=Rattus norvegicus OX=10116 GN=ND2 PE=3 SV=1
66	276	tr|Q06QE9|Q06QE9_RAT	73.13	8	8	614970	5	5	7		38598	NADH-ubiquinone oxidoreductase chain 2 OS=Rattus norvegicus OX=10116 GN=ND2 PE=3 SV=1
66	273	tr|Q8SEZ7|Q8SEZ7_RAT	73.13	8	8	614970	5	5	7		38580	NADH-ubiquinone oxidoreductase chain 2 (Fragment) OS=Rattus norvegicus OX=10116 GN=NADH2 PE=3 SV=1
71	246	P19511|AT5F1_RAT	72.84	9	9	4662500	3	3	5		28869	ATP synthase F(0) complex subunit B1 mitochondrial OS=Rattus norvegicus OX=10116 GN=Atp5pb PE=1 SV=1
73	190	P07824|ARGI1_RAT	72.36	11	11	1589000	3	3	4		34973	Arginase-1 OS=Rattus norvegicus OX=10116 GN=Arg1 PE=1 SV=2
53	235	tr|B2RYW3|B2RYW3_RAT	70.71	19	19	3435700	4	4	10		21892	NADH dehydrogenase (Ubiquinone) 1 beta subcomplex 9 OS=Rattus norvegicus OX=10116 GN=Ndufb9 PE=1 SV=1
54	134	tr|B2RYS2|B2RYS2_RAT	70.53	24	24	5922600	6	5	10		13559	Cytochrome b-c1 complex subunit 7 OS=Rattus norvegicus OX=10116 GN=Uqcrb PE=1 SV=1
81	222	tr|Q4G067|Q4G067_RAT	69.99	4	4	915010	2	2	4		37440	Mitochondrial ribosomal protein L44 OS=Rattus norvegicus OX=10116 GN=Mrpl44 PE=1 SV=1
57	286	Q7TQ16|QCR8_RAT	65.36	18	18	2535900	5	5	9		9849	Cytochrome b-c1 complex subunit 8 OS=Rattus norvegicus OX=10116 GN=Uqcrq PE=3 SV=1
98	218	P63039|CH60_RAT	64.67	6	6	1374700	3	3	3	Oxidation (M)	60956	60 kDa heat shock protein mitochondrial OS=Rattus norvegicus OX=10116 GN=Hspd1 PE=1 SV=1
98	219	tr|A0A482IDN3|A0A482IDN3_RAT	64.67	6	6	1374700	3	3	3	Oxidation (M)	60956	Hsp60 OS=Rattus norvegicus OX=10116 GN=Hspd1 PE=2 SV=1
80	5780	tr|D4A4B1|D4A4B1_RAT	63.07	8	8	184000	4	4	4		23223	Mitochondrial ribosomal protein L15 OS=Rattus norvegicus OX=10116 GN=Mrpl15 PE=1 SV=2
80	368	tr|A0A0G2K9B4|A0A0G2K9B4_RAT	63.07	5	5	184000	4	4	4		33652	Mitochondrial ribosomal protein L15 OS=Rattus norvegicus OX=10116 GN=Mrpl15 PE=1 SV=1
76	111	tr|S5RZM8|S5RZM8_RAT	59.89	7	7	706080	3	3	4		25958	Cytochrome c oxidase subunit 2 OS=Rattus norvegicus OX=10116 GN=COX2 PE=3 SV=1
76	112	P00406|COX2_RAT	59.89	7	7	706080	3	3	4		25928	Cytochrome c oxidase subunit 2 OS=Rattus norvegicus OX=10116 GN=Mtco2 PE=1 SV=3
76	104	tr|Q5UAJ6|Q5UAJ6_RAT	59.89	7	7	706080	3	3	4		25942	Cytochrome c oxidase subunit 2 OS=Rattus norvegicus OX=10116 GN=COX2 PE=3 SV=1
76	113	tr|Q8SEZ5|Q8SEZ5_RAT	59.89	7	7	706080	3	3	4		25928	Cytochrome c oxidase subunit 2 OS=Rattus norvegicus OX=10116 GN=Mt-co2 PE=1 SV=1
76	114	tr|A0A097PE04|A0A097PE04_RAT	59.89	7	7	706080	3	3	4		25894	Cytochrome c oxidase subunit 2 OS=Rattus norvegicus OX=10116 GN=COX2 PE=3 SV=1
68	14	tr|F1LN92|F1LN92_RAT	59.26	5	5	4867100	6	6	6	Oxidation (M)	89352	AFG3-like matrix AAA peptidase subunit 2 OS=Rattus norvegicus OX=10116 GN=Afg3l2 PE=1 SV=1
70	414	tr|D4A4P3|D4A4P3_RAT	53.7	22	22	1966000	3	3	6	Oxidation (M)	11267	NADH:ubiquinone oxidoreductase subunit B3 OS=Rattus norvegicus OX=10116 GN=Ndufb3 PE=1 SV=1
122	253	Q9ER34|ACON_RAT	53.06	2	2	297880	2	2	2		85433	Aconitate hydratase mitochondrial OS=Rattus norvegicus OX=10116 GN=Aco2 PE=1 SV=2
261	287	tr|D3ZX69|D3ZX69_RAT	47.58	5	5	338310	1	1	1		29466	39S ribosomal protein L10 mitochondrial OS=Rattus norvegicus OX=10116 GN=Mrpl10 PE=1 SV=1
261	223	P0C2C4|RM10_RAT	47.58	5	5	338310	1	1	1		29940	39S ribosomal protein L10 mitochondrial OS=Rattus norvegicus OX=10116 GN=Mrpl10 PE=1 SV=1
133	146	tr|B0BMT9|B0BMT9_RAT	44.76	4	4	246070	2	2	2		50202	Sqrdl protein OS=Rattus norvegicus OX=10116 GN=Sqor PE=1 SV=1
93	265	Q63750|RM23_RAT	44.68	19	19	364040	3	3	3		17050	39S ribosomal protein L23 mitochondrial OS=Rattus norvegicus OX=10116 GN=Mrpl23 PE=2 SV=1
99	424	Q9Z0W7|CLIC4_RAT	44.57	5	5	81479	3	1	3		28633	Chloride intracellular channel protein 4 OS=Rattus norvegicus OX=10116 GN=Clic4 PE=1 SV=3
99	425	tr|G3V8C4|G3V8C4_RAT	44.57	5	5	81479	3	1	3		28669	Chloride intracellular channel protein OS=Rattus norvegicus OX=10116 GN=Clic4 PE=1 SV=1
79	59	P17178|CP27A_RAT	43.75	5	5	595830	3	2	4		60733	Sterol 26-hydroxylase mitochondrial OS=Rattus norvegicus OX=10116 GN=Cyp27a1 PE=1 SV=1
79	60	tr|A0A0H2UHN7|A0A0H2UHN7_RAT	43.75	5	5	595830	3	2	4		62492	RCG24013 isoform CRA_a OS=Rattus norvegicus OX=10116 GN=Cyp27a1 PE=1 SV=1
131	210	tr|Q5M949|Q5M949_RAT	41.6	6	6	562570	2	2	2		28340	Nipsnap homolog 3A (C. elegans) OS=Rattus norvegicus OX=10116 GN=Nipsnap3b PE=1 SV=1
112	341	tr|G3V6I5|G3V6I5_RAT	40.45	3	3	138270	1	1	2		46777	DnaJ heat shock protein family (Hsp40) member A3 OS=Rattus norvegicus OX=10116 GN=Dnaja3 PE=1 SV=2
112	342	tr|Q2TVU3|Q2TVU3_RAT	40.45	3	3	138270	1	1	2		49412	TID1 OS=Rattus norvegicus OX=10116 GN=Dnaja3 PE=2 SV=1
112	343	tr|A0A0G2K4Y1|A0A0G2K4Y1_RAT	40.45	3	3	138270	1	1	2		49416	DnaJ heat shock protein family (Hsp40) member A3 OS=Rattus norvegicus OX=10116 GN=Dnaja3 PE=1 SV=1
112	344	tr|Q2UZS7|Q2UZS7_RAT	40.45	2	2	138270	1	1	2		52399	Tid-1 long isoform OS=Rattus norvegicus OX=10116 GN=Dnaja3 PE=2 SV=1
112	345	tr|A0A0G2K5E4|A0A0G2K5E4_RAT	40.45	2	2	138270	1	1	2		52403	DnaJ heat shock protein family (Hsp40) member A3 OS=Rattus norvegicus OX=10116 GN=Dnaja3 PE=1 SV=1
132	216	Q9R063|PRDX5_RAT	40.42	9	9	217360	2	2	2		22179	Peroxiredoxin-5 mitochondrial OS=Rattus norvegicus OX=10116 GN=Prdx5 PE=1 SV=1
132	217	tr|A0A0G2JSS8|A0A0G2JSS8_RAT	40.42	9	9	217360	2	2	2		22207	Peroxiredoxin OS=Rattus norvegicus OX=10116 GN=Prdx5 PE=1 SV=1
134	379	tr|D3ZDP2|D3ZDP2_RAT	40.31	4	4	428040	2	2	2		23470	Mitochondrial ribosomal protein L58 OS=Rattus norvegicus OX=10116 GN=Mrpl58 PE=1 SV=1
136	322	P12075|COX5B_RAT	39.16	9	9	596380	2	2	2		13915	Cytochrome c oxidase subunit 5B mitochondrial OS=Rattus norvegicus OX=10116 GN=Cox5b PE=1 SV=2
262	224	tr|D3ZXF9|D3ZXF9_RAT	38.96	4	4	87936	1	1	1		29441	Mitochondrial ribosomal protein L12 OS=Rattus norvegicus OX=10116 GN=Mrpl12 PE=1 SV=1
120	143	tr|Q5EBA4|Q5EBA4_RAT	38.62	5	5	536170	2	2	2		33215	Nipsnap1 protein (Fragment) OS=Rattus norvegicus OX=10116 GN=Nipsnap1 PE=2 SV=1
120	144	tr|G3V728|G3V728_RAT	38.62	5	5	536170	2	2	2		33346	4-nitrophenylphosphatase domain and non-neuronal SNAP25-like protein homolog 1 (C. elegans) isoform CRA_b OS=Rattus norvegicus OX=10116 GN=Nipsnap1 PE=1 SV=1
108	324	P11497|ACACA_RAT	38.48	1	1	107980	2	1	2		265191	Acetyl-CoA carboxylase 1 OS=Rattus norvegicus OX=10116 GN=Acaca PE=1 SV=1
89	725	tr|F1LP30|F1LP30_RAT	38.27	3	3	21383	2	1	3		79296	Methylcrotonoyl-CoA carboxylase subunit alpha mitochondrial OS=Rattus norvegicus OX=10116 GN=Mccc1 PE=1 SV=1
89	726	Q5I0C3|MCCA_RAT	38.27	3	3	21383	2	1	3		79330	Methylcrotonoyl-CoA carboxylase subunit alpha mitochondrial OS=Rattus norvegicus OX=10116 GN=Mccc1 PE=1 SV=1
119	195	P49432|ODPB_RAT	37.65	5	5	92751	2	2	2		38982	Pyruvate dehydrogenase E1 component subunit beta mitochondrial OS=Rattus norvegicus OX=10116 GN=Pdhb PE=1 SV=2
119	196	tr|A0A0G2KAM3|A0A0G2KAM3_RAT	37.65	4	4	92751	2	2	2		46193	Pyruvate dehydrogenase E1 component subunit beta OS=Rattus norvegicus OX=10116 GN=Pdhb PE=1 SV=1
171	306	Q2V057|HYPDH_RAT	36.8	2	2	71910	1	1	1		51002	Hydroxyproline dehydrogenase OS=Rattus norvegicus OX=10116 GN=Prodh2 PE=2 SV=1
100	366	P33124|ACSL6_RAT	36.34	3	3	170280	2	1	3	Formylation	78180	Long-chain-fatty-acid--CoA ligase 6 OS=Rattus norvegicus OX=10116 GN=Acsl6 PE=1 SV=1
92	375	tr|A0A0G2K2Q2|A0A0G2K2Q2_RAT	36.28	4	4	864110	2	2	3		45197	Glycine C-acetyltransferase OS=Rattus norvegicus OX=10116 GN=Gcat PE=1 SV=1
123	289	tr|Q5XFW4|Q5XFW4_RAT	35.43	7	7	275320	1	1	2		20541	Mitochondrial ribosomal protein L13 OS=Rattus norvegicus OX=10116 GN=Mrpl13 PE=1 SV=1
225	5798	tr|Q8SEZ1|Q8SEZ1_RAT	35.15	6	6	0	1	1	1		13087	NADH-ubiquinone oxidoreductase chain 3 OS=Rattus norvegicus OX=10116 GN=Mt-nd3 PE=2 SV=1
225	5799	P05506|NU3M_RAT	35.15	6	6	0	1	1	1		13087	NADH-ubiquinone oxidoreductase chain 3 OS=Rattus norvegicus OX=10116 GN=Mtnd3 PE=3 SV=3
225	5800	tr|A0A0A1FZ38|A0A0A1FZ38_RAT	35.15	6	6	0	1	1	1		13071	NADH-ubiquinone oxidoreductase chain 3 OS=Rattus norvegicus OX=10116 GN=ND3 PE=3 SV=1
225	5801	tr|Q06QG9|Q06QG9_RAT	35.15	6	6	0	1	1	1		13075	NADH-ubiquinone oxidoreductase chain 3 OS=Rattus norvegicus OX=10116 GN=ND3 PE=3 SV=1
95	656	tr|D3ZD23|D3ZD23_RAT	34.78	1	1	481490	2	2	3		67300	ATP-binding cassette subfamily E member 1 OS=Rattus norvegicus OX=10116 GN=Abce1 PE=1 SV=1
263	5797	tr|D4A830|D4A830_RAT	34.64	3	3	131120	1	1	1		35047	Inorganic pyrophosphatase 2 OS=Rattus norvegicus OX=10116 GN=Ppa2 PE=1 SV=2
101	446	Q91XJ1|BECN1_RAT	34.45	2	2		2	0	3		51557	Beclin-1 OS=Rattus norvegicus OX=10116 GN=Becn1 PE=1 SV=1
219	5790	Q66H47|RM24_RAT	34.33	6	6	94023	1	1	1		25001	39S ribosomal protein L24 mitochondrial OS=Rattus norvegicus OX=10116 GN=Mrpl24 PE=2 SV=1
265	367	tr|D3ZXF8|D3ZXF8_RAT	34.13	5	5	165540	1	1	1		17575	Mitochondrial ribosomal protein L43 OS=Rattus norvegicus OX=10116 GN=Mrpl43 PE=1 SV=3
266	211	P70584|ACDSB_RAT	33.43	2	2	147650	1	1	1		47824	Short/branched chain specific acyl-CoA dehydrogenase mitochondrial OS=Rattus norvegicus OX=10116 GN=Acadsb PE=1 SV=1
266	212	tr|A0A0A0MY00|A0A0A0MY00_RAT	33.43	2	2	147650	1	1	1		52043	Short/branched chain-specific acyl-CoA dehydrogenase mitochondrial OS=Rattus norvegicus OX=10116 GN=Acadsb PE=1 SV=2
217	5788	tr|Q3B8N9|Q3B8N9_RAT	33.32	3	3	225970	1	1	1		32823	Biphenyl hydrolase-like OS=Rattus norvegicus OX=10116 GN=Bphl PE=1 SV=1
264	264	tr|D3ZTW8|D3ZTW8_RAT	33.17	8	8	0	1	1	1		15823	Mitochondrial ribosomal protein L27 OS=Rattus norvegicus OX=10116 GN=Mrpl27 PE=1 SV=2
124	349	Q5I0C5|FMT_RAT	32.97	2	2	766540	1	1	2	Formylation	42997	Methionyl-tRNA formyltransferase mitochondrial OS=Rattus norvegicus OX=10116 GN=Mtfmt PE=2 SV=1
267	5802	Q06647|ATPO_RAT	32.88	4	4	77592	1	1	1		23398	ATP synthase subunit O mitochondrial OS=Rattus norvegicus OX=10116 GN=Atp5po PE=1 SV=1
190	208	P13803|ETFA_RAT	32.42	3	3	416750	1	1	1		34951	Electron transfer flavoprotein subunit alpha mitochondrial OS=Rattus norvegicus OX=10116 GN=Etfa PE=1 SV=4
269	312	tr|D3ZGM1|D3ZGM1_RAT	31.96	1	1	100270	1	1	1		77891	Pentatricopeptide repeat domain 3 OS=Rattus norvegicus OX=10116 GN=Ptcd3 PE=1 SV=1
269	313	tr|A0A0G2JU15|A0A0G2JU15_RAT	31.96	1	1	100270	1	1	1		84557	Pentatricopeptide repeat domain 3 OS=Rattus norvegicus OX=10116 GN=Ptcd3 PE=1 SV=1
270	448	tr|A0A0G2K2J7|A0A0G2K2J7_RAT	31.81	2	2	96094	1	1	1		41504	Solute carrier family 25 member 12 OS=Rattus norvegicus OX=10116 GN=Slc25a12 PE=1 SV=1
270	333	tr|F1LZW6|F1LZW6_RAT	31.81	2	2	96094	1	1	1		54099	Solute carrier family 25 member 13 OS=Rattus norvegicus OX=10116 GN=Slc25a13 PE=1 SV=2
270	456	tr|F1LX07|F1LX07_RAT	31.81	1	1	96094	1	1	1		71917	Solute carrier family 25 member 12 OS=Rattus norvegicus OX=10116 GN=Slc25a12 PE=1 SV=3
191	5781	Q5XIC0|ECI2_RAT	30.23	2	2	0	1	1	1		43021	Enoyl-CoA delta isomerase 2 mitochondrial OS=Rattus norvegicus OX=10116 GN=Eci2 PE=1 SV=1
191	5793	tr|Q5M884|Q5M884_RAT	30.23	3	3	0	1	1	1		33686	Enoyl-CoA delta isomerase 2 mitochondrial OS=Rattus norvegicus OX=10116 GN=Eci3 PE=1 SV=1
191	5794	tr|A0A0G2K277|A0A0G2K277_RAT	30.23	2	2	0	1	1	1		42325	Enoyl-CoA delta isomerase 2 mitochondrial OS=Rattus norvegicus OX=10116 GN=Eci3 PE=1 SV=1
125	1095	tr|Q5UAJ5|Q5UAJ5_RAT	29.81	13	13	713310	1	1	2		7642	ATP synthase protein 8 OS=Rattus norvegicus OX=10116 GN=ATP8 PE=3 SV=1
125	1096	P11608|ATP8_RAT	29.81	13	13	713310	1	1	2		7630	ATP synthase protein 8 OS=Rattus norvegicus OX=10116 GN=Mt-atp8 PE=1 SV=2
125	1097	tr|Q8SEZ4|Q8SEZ4_RAT	29.81	13	13	713310	1	1	2		7632	ATP synthase protein 8 OS=Rattus norvegicus OX=10116 GN=ATPase8 PE=3 SV=1
125	1098	tr|Q8HIC8|Q8HIC8_RAT	29.81	13	13	713310	1	1	2		7630	ATP synthase protein 8 OS=Rattus norvegicus OX=10116 GN=Mt-atp8 PE=3 SV=1
109	61	P29147|BDH_RAT	29.73	3	3	74022	2	2	2		38202	D-beta-hydroxybutyrate dehydrogenase mitochondrial OS=Rattus norvegicus OX=10116 GN=Bdh1 PE=1 SV=2
109	62	tr|A0A0G2JSH2|A0A0G2JSH2_RAT	29.73	3	3	74022	2	2	2		38333	3-hydroxybutyrate dehydrogenase type 1 isoform CRA_a OS=Rattus norvegicus OX=10116 GN=Bdh1 PE=1 SV=1
271	5804	tr|A0A0G2K401|A0A0G2K401_RAT	29.69	1	1	0	1	1	1		79812	Propionyl-CoA carboxylase alpha chain mitochondrial OS=Rattus norvegicus OX=10116 GN=Pcca PE=1 SV=1
271	5805	tr|A0A0G2K5P9|A0A0G2K5P9_RAT	29.69	1	1	0	1	1	1		81413	Propionyl-CoA carboxylase alpha chain mitochondrial OS=Rattus norvegicus OX=10116 GN=Pcca PE=1 SV=1
271	5806	P14882|PCCA_RAT	29.69	1	1	0	1	1	1		81623	Propionyl-CoA carboxylase alpha chain mitochondrial OS=Rattus norvegicus OX=10116 GN=Pcca PE=1 SV=3
104	595	Q9Z286|ADCYA_RAT	29.49	1	1	0	2	1	2		185852	Adenylate cyclase type 10 OS=Rattus norvegicus OX=10116 GN=Adcy10 PE=1 SV=1
90	5782	Q09073|ADT2_RAT	29.26	11	11	1048900	3	3	3	Formylation	32901	ADP/ATP translocase 2 OS=Rattus norvegicus OX=10116 GN=Slc25a5 PE=1 SV=3
220	5791	tr|F1LSY7|F1LSY7_RAT	29.22	1	1	161950	1	1	1		109031	Endoplasmic reticulum to nucleus-signaling 1 OS=Rattus norvegicus OX=10116 GN=Ern1 PE=4 SV=2
220	5792	tr|A0A0G2K2H4|A0A0G2K2H4_RAT	29.22	1	1	161950	1	1	1		110150	Endoplasmic reticulum to nucleus-signaling 1 OS=Rattus norvegicus OX=10116 GN=Ern1 PE=2 SV=1
223	369	tr|G3V734|G3V734_RAT	28.95	3	3	160460	1	1	1		36133	2 4-dienoyl CoA reductase 1 mitochondrial isoform CRA_a OS=Rattus norvegicus OX=10116 GN=Decr1 PE=1 SV=1
223	370	Q64591|DECR_RAT	28.95	3	3	160460	1	1	1		36133	2 4-dienoyl-CoA reductase mitochondrial OS=Rattus norvegicus OX=10116 GN=Decr1 PE=1 SV=2
218	140	tr|F1LN88|F1LN88_RAT	28.91	2	2	316230	1	1	1		56517	Aldehyde dehydrogenase mitochondrial OS=Rattus norvegicus OX=10116 GN=Aldh2 PE=1 SV=2
218	141	P11884|ALDH2_RAT	28.91	2	2	316230	1	1	1		56488	Aldehyde dehydrogenase mitochondrial OS=Rattus norvegicus OX=10116 GN=Aldh2 PE=1 SV=1
222	5796	B1WC61|ACAD9_RAT	28.73	2	2	80996	1	1	1		68843	Complex I assembly factor ACAD9 mitochondrial OS=Rattus norvegicus OX=10116 GN=Acad9 PE=1 SV=1
196	907	P70705|ATP7A_RAT	28.38	1	1	0	1	1	1		162092	Copper-transporting ATPase 1 OS=Rattus norvegicus OX=10116 GN=Atp7a PE=1 SV=1
172	1044	tr|D4ACE9|D4ACE9_RAT	28.05	2	2	74506	1	1	1		103115	Alpha-aminoadipic semialdehyde synthase mitochondrial OS=Rattus norvegicus OX=10116 GN=Aass PE=1 SV=3
172	742	A2VCW9|AASS_RAT	28.05	2	2	74506	1	1	1		102908	Alpha-aminoadipic semialdehyde synthase mitochondrial OS=Rattus norvegicus OX=10116 GN=Aass PE=2 SV=1
115	283	Q9WVK3|PECR_RAT	27.03	4	4	297200	1	1	2		32433	Peroxisomal trans-2-enoyl-CoA reductase OS=Rattus norvegicus OX=10116 GN=Pecr PE=2 SV=1
115	284	tr|A0A0G2JVG4|A0A0G2JVG4_RAT	27.03	4	4	297200	1	1	2		32737	Peroxisomal trans-2-enoyl-CoA reductase OS=Rattus norvegicus OX=10116 GN=Pecr PE=1 SV=1
221	5795	tr|A9UMV7|A9UMV7_RAT	26.45	11	11	96846	1	1	1		6539	RCG29512 OS=Rattus norvegicus OX=10116 GN=Uqcr11 PE=1 SV=1
106	1081	tr|Q5XHZ7|Q5XHZ7_RAT	26.31	2	2	131220	2	1	2		66660	MMR_HSR1 domain containing protein RGD1359460 OS=Rattus norvegicus OX=10116 GN=Noa1 PE=2 SV=1
106	1082	tr|A0A0G2JUI4|A0A0G2JUI4_RAT	26.31	2	2	131220	2	1	2		66708	Nitric oxide-associated 1 OS=Rattus norvegicus OX=10116 GN=Noa1 PE=4 SV=1
106	1089	tr|A0A0G2K602|A0A0G2K602_RAT	26.31	2	2	131220	2	1	2		77504	MMR_HSR1 domain containing protein RGD1359460 isoform CRA_a OS=Rattus norvegicus OX=10116 GN=Noa1 PE=4 SV=1
142	5823	Q68FU4|SUCHY_RAT	26.28	2	2		2	0	2		47549	Succinate--hydroxymethylglutarate CoA-transferase OS=Rattus norvegicus OX=10116 GN=Sugct PE=2 SV=1
137	1384	P97615|THIOM_RAT	26.16	7	7	97359	2	1	2		18232	Thioredoxin mitochondrial OS=Rattus norvegicus OX=10116 GN=Txn2 PE=2 SV=1
114	5786	tr|D4A5P3|D4A5P3_RAT	25.95	3	3	0	2	1	2		59813	Mitoguardin 1 OS=Rattus norvegicus OX=10116 GN=Miga1 PE=4 SV=1
114	5787	tr|A0A0G2K2T2|A0A0G2K2T2_RAT	25.95	2	2	0	2	1	2		67482	Mitoguardin 1 OS=Rattus norvegicus OX=10116 GN=Miga1 PE=4 SV=1
83	555	tr|D4A1D3|D4A1D3_RAT	25.04	0	0	410840	2	1	3		521487	Sacsin molecular chaperone OS=Rattus norvegicus OX=10116 GN=Sacs PE=1 SV=2
144	1485	tr|D3ZA68|D3ZA68_RAT	24.92	2	2	0	2	1	2		76890	Progressive external ophthalmoplegia 1 homolog (Human) (Predicted) OS=Rattus norvegicus OX=10116 GN=Twnk PE=4 SV=1
116	5810	tr|A0A0H2UHT3|A0A0H2UHT3_RAT	24.61	4	4	0	2	1	2		25865	39S ribosomal protein L22 mitochondrial OS=Rattus norvegicus OX=10116 GN=Mrpl22 PE=1 SV=1
116	5841	P0C2C0|RM22_RAT	24.61	5	5	0	2	1	2		24039	39S ribosomal protein L22 mitochondrial OS=Rattus norvegicus OX=10116 GN=Mrpl22 PE=1 SV=1
91	236	tr|Q5U2T0|Q5U2T0_RAT	23.94	3	3	7661	2	2	3		44494	Death associated protein 3 OS=Rattus norvegicus OX=10116 GN=Dap3 PE=2 SV=1
91	237	tr|F7EZZ0|F7EZZ0_RAT	23.94	3	3	7661	2	2	3		45112	Death-associated protein 3 OS=Rattus norvegicus OX=10116 GN=Dap3 PE=1 SV=1
91	242	tr|A0A0G2K264|A0A0G2K264_RAT	23.94	2	2	7661	2	2	3		46666	Death-associated protein 3 OS=Rattus norvegicus OX=10116 GN=Dap3 PE=1 SV=1
224	139	Q6AXV4|SAM50_RAT	23.79	2	2	141250	1	1	1		51960	Sorting and assembly machinery component 50 homolog OS=Rattus norvegicus OX=10116 GN=Samm50 PE=1 SV=1
128	1105	tr|B5DFI9|B5DFI9_RAT	23.69	3	3	317920	2	1	2		47944	Protein-serine/threonine kinase OS=Rattus norvegicus OX=10116 GN=Pdk3 PE=2 SV=1
273	5817	P21571|ATP5J_RAT	23.6	9	9	72025	1	1	1		12494	ATP synthase-coupling factor 6 mitochondrial OS=Rattus norvegicus OX=10116 GN=Atp5pf PE=1 SV=1
96	5819	tr|B2RYU0|B2RYU0_RAT	23.08	12	12	1404300	1	1	3		11842	NADH dehydrogenase (Ubiquinone) 1 beta subcomplex 2 (Predicted) isoform CRA_b OS=Rattus norvegicus OX=10116 GN=Ndufb2 PE=1 SV=1
226	1690	tr|B1WBY5|B1WBY5_RAT	22.53	1	1	0	1	1	1		63205	DnaJ (Hsp40) homolog subfamily C member 11 OS=Rattus norvegicus OX=10116 GN=Dnajc11 PE=1 SV=1
82	599	Q00918|LTBP1_RAT	22.51	1	1	2254700	1	1	4	Carbamidomethylation	186598	Latent-transforming growth factor beta-binding protein 1 OS=Rattus norvegicus OX=10116 GN=Ltbp1 PE=1 SV=1
274	398	P48037|ANXA6_RAT	22.4	1	1	313530	1	1	1		75754	Annexin A6 OS=Rattus norvegicus OX=10116 GN=Anxa6 PE=1 SV=2
274	399	tr|Q6IMZ3|Q6IMZ3_RAT	22.4	1	1	313530	1	1	1		75756	Annexin OS=Rattus norvegicus OX=10116 GN=Anxa6 PE=1 SV=1
194	188	O70351|HCD2_RAT	22.09	3	3	161270	1	1	1		27246	3-hydroxyacyl-CoA dehydrogenase type-2 OS=Rattus norvegicus OX=10116 GN=Hsd17b10 PE=1 SV=3
194	189	tr|B0BMW2|B0BMW2_RAT	22.09	3	3	161270	1	1	1		27250	3-hydroxyacyl-CoA dehydrogenase type-2 OS=Rattus norvegicus OX=10116 GN=Hsd17b10 PE=1 SV=1
174	393	Q63563|ABCC9_RAT	21.99	1	1	1306900	1	1	1		174117	ATP-binding cassette sub-family C member 9 OS=Rattus norvegicus OX=10116 GN=Abcc9 PE=1 SV=1
129	890	tr|D3ZAE6|D3ZAE6_RAT	21.73	1	1	406270	1	1	2		72321	RCG49849 OS=Rattus norvegicus OX=10116 GN=Vasn PE=1 SV=1
129	6092	Q2Q0I9|FNDC1_RAT	21.73	0	0	406270	1	1	2		194048	Fibronectin type III domain-containing protein 1 OS=Rattus norvegicus OX=10116 GN=Fndc1 PE=1 SV=2
97	497	tr|Q9JID3|Q9JID3_RAT	21.51	2	2	311010	1	1	3	Oxidation (M)	43884	Protein-serine/threonine kinase OS=Rattus norvegicus OX=10116 PE=2 SV=1
97	729	tr|F1LMM8|F1LMM8_RAT	21.51	2	2	311010	1	1	3	Oxidation (M)	46240	Protein-serine/threonine kinase OS=Rattus norvegicus OX=10116 GN=Pdk2 PE=1 SV=3
97	498	Q64536|PDK2_RAT	21.51	2	2	311010	1	1	3	Oxidation (M)	46106	[Pyruvate dehydrogenase (acetyl-transferring)] kinase isozyme 2 mitochondrial OS=Rattus norvegicus OX=10116 GN=Pdk2 PE=1 SV=1
127	5826	tr|A0A0G2KAB9|A0A0G2KAB9_RAT	21.46	2	2	47365	1	1	2		28715	Autophagy protein 5 OS=Rattus norvegicus OX=10116 GN=Atg5 PE=1 SV=1
127	5827	Q3MQ06|ATG5_RAT	21.46	2	2	47365	1	1	2		32398	Autophagy protein 5 OS=Rattus norvegicus OX=10116 GN=Atg5 PE=2 SV=1
143	584	tr|D3ZYM7|D3ZYM7_RAT	21.24	10	10	1643600	1	1	2		10816	LYR motif-containing 4 OS=Rattus norvegicus OX=10116 GN=Lyrm4 PE=1 SV=1
156	489	tr|D3ZL86|D3ZL86_RAT	21.19	0	0		1	0	1		241219	HEAT repeat-containing protein 1 OS=Rattus norvegicus OX=10116 GN=Heatr1 PE=1 SV=2
192	612	tr|A0A0G2JYY2|A0A0G2JYY2_RAT	21.09	1	1	375600	1	1	1		62571	5-aminolevulinate synthase OS=Rattus norvegicus OX=10116 GN=Alas1 PE=1 SV=1
192	613	tr|A0A0G2K962|A0A0G2K962_RAT	21.09	1	1	375600	1	1	1		71039	5-aminolevulinate synthase OS=Rattus norvegicus OX=10116 GN=Alas1 PE=1 SV=1
192	614	P13195|HEM1_RAT	21.09	1	1	375600	1	1	1		71021	5-aminolevulinate synthase nonspecific mitochondrial OS=Rattus norvegicus OX=10116 GN=Alas1 PE=2 SV=2
276	361	P80433|COX8A_RAT	20.66	14	14	101440	1	1	1		7672	Cytochrome c oxidase subunit 8A mitochondrial OS=Rattus norvegicus OX=10116 GN=Cox8a PE=1 SV=3
230	5820	tr|D4A8P8|D4A8P8_RAT	20.55	1	1	322240	1	1	1		92336	Hypoxia-inducible factor 1-alpha OS=Rattus norvegicus OX=10116 GN=Hif1a PE=4 SV=2
230	5821	O35800|HIF1A_RAT	20.55	1	1	322240	1	1	1		92319	Hypoxia-inducible factor 1-alpha OS=Rattus norvegicus OX=10116 GN=Hif1a PE=2 SV=1
182	1280	tr|Q5U2M4|Q5U2M4_RAT	20.55	1	1	0	1	1	1		105443	DNA ligase OS=Rattus norvegicus OX=10116 GN=Lig3 PE=1 SV=1
182	1281	tr|A0A096MKE9|A0A096MKE9_RAT	20.55	1	1	0	1	1	1		112017	DNA ligase OS=Rattus norvegicus OX=10116 GN=Lig3 PE=1 SV=1
162	1672	tr|F1LSE5|F1LSE5_RAT	20.41	1	1	0	1	1	1		109803	Neighbor of Brca1 gene 1 isoform CRA_a OS=Rattus norvegicus OX=10116 GN=Nbr1 PE=1 SV=2
278	197	tr|M0R6J0|M0R6J0_RAT	20.31	3	3	81899	1	1	1		38374	Mitochondrial ribosomal protein L39 OS=Rattus norvegicus OX=10116 GN=Mrpl39 PE=1 SV=2
280	5834	tr|D4A131|D4A131_RAT	20.03	2	2	79613	1	1	1		33082	Mitochondrial ribosomal protein L4 OS=Rattus norvegicus OX=10116 GN=Mrpl4 PE=1 SV=1

## Sheet: RLM SM-BM PTP III(2)-IVx
Protein Group	Protein ID	Accession	-10lgP	Coverage (%)	Coverage (%) Sample 6	IBAQ	#Peptides	#Unique	#Spec Sample 6	PTM	Avg. Mass	Description
2	1	P10860|DHE3_RAT	381.48	57	57	381290000	160	158	291	Carbamidomethylation		Glutamate dehydrogenase 1, mitochondrial
1	30	P52873|PYC_RAT	358.29	46	46	342180000	177	172	328	Oxidation (M)	129777	Pyruvate carboxylase mitochondrial OS=Rattus norvegicus OX=10116 GN=Pc PE=1 SV=2
1	31	tr|A0A0G2JTL5|A0A0G2JTL5_RAT	358.29	42	42	342180000	177	172	328	Oxidation (M)	140005	Pyruvate carboxylase mitochondrial OS=Rattus norvegicus OX=10116 GN=Pc PE=1 SV=1
4	8	P10719|ATPB_RAT	356.81	45	45	427970000	118	115	223	Oxidation (M)	56354	ATP synthase subunit beta mitochondrial OS=Rattus norvegicus OX=10116 GN=Atp5f1b PE=1 SV=2
4	9	tr|G3V6D3|G3V6D3_RAT	356.81	45	45	427970000	118	115	223	Oxidation (M)	56345	ATP synthase subunit beta OS=Rattus norvegicus OX=10116 GN=Atp5f1b PE=1 SV=1
3	10	P15999|ATPA_RAT	323.73	49	49	363670000	120	118	259	Carbamidomethylation		ATP synthase subunit alpha, mitochondrial
3	11	tr|F1LP05|F1LP05_RAT	323.73	49	49	363670000	120	118	259	Carbamidomethylation
12	171	tr|D3ZFJ6|D3ZFJ6_RAT	307.73	29	29	50214000	40	40	64	Carbamidomethylation	60420	Lactamase beta OS=Rattus norvegicus OX=10116 GN=Lactb PE=1 SV=1
9	742	A2VCW9|AASS_RAT	303.36	33	33	31563000	57	57	80	Carbamidomethylation		Alpha-aminoadipic semialdehyde synthase, mitochondrial
5	4	P07756|CPSM_RAT	295.28	34	34	101200000	106	105	153	Carbamidomethylation		Carbamoyl-phosphate synthase [ammonia], mitochondrial
7	26	P00507|AATM_RAT	266.63	42	42	105000000	59	55	101	Oxidation (M)	47314	Aspartate aminotransferase mitochondrial OS=Rattus norvegicus OX=10116 GN=Got2 PE=1 SV=2
19	119	P31399|ATP5H_RAT	257.35	51	51	39356000	25	24	46	Carbamidomethylation		ATP synthase subunit d, mitochondrial
10	63	tr|Q6QI09|Q6QI09_RAT	253.72	16	16	51008000	31	31	72	Oxidation (M)	67721	ATP synthase subunit gamma mitochondrial OS=Rattus norvegicus OX=10116 GN=Taf3 PE=1 SV=1
11	24	Q64428|ECHA_RAT	243.93	27	27	36205000	42	41	66	Carbamidomethylation		Trifunctional enzyme subunit alpha, mitochondrial
22	38	tr|D3ZFQ8|D3ZFQ8_RAT	240.17	33	33	41897000	28	28	41	Oxidation (M)	35435	Cytochrome c-1 OS=Rattus norvegicus OX=10116 GN=Cyc1 PE=1 SV=3
13	5806	P14882|PCCA_RAT	239.1	29	29	2206900	45	4	63	Carbamidomethylation		Propionyl-CoA carboxylase alpha chain, mitochondrial
16	27	Q60587|ECHB_RAT	238.56	29	29	27068000	36	35	55	Oxidation (M)	51414	Trifunctional enzyme subunit beta mitochondrial OS=Rattus norvegicus OX=10116 GN=Hadhb PE=1 SV=1
15	45	P04762|CATA_RAT	234.4	33	33	30538000	36	36	58	Oxidation (M)	59757	Catalase OS=Rattus norvegicus OX=10116 GN=Cat PE=1 SV=3
26	42	P20788|UCRI_RAT	233.43	36	36	29456000	21	21	34	Oxidation (M)	29446	Cytochrome b-c1 complex subunit Rieske mitochondrial OS=Rattus norvegicus OX=10116 GN=Uqcrfs1 PE=1 SV=2
8	16	Q68FY0|QCR1_RAT	230.64	34	34	76421000	44	43	87	Carbamidomethylation	52849	Cytochrome b-c1 complex subunit 1 mitochondrial OS=Rattus norvegicus OX=10116 GN=Uqcrc1 PE=1 SV=1
14	5804	tr|A0A0G2K401|A0A0G2K401_RAT	229.44	28	28	195680	42	1	60	Carbamidomethylation		Propionyl-CoA carboxylase alpha chain, mitochondrial
14	5805	tr|A0A0G2K5P9|A0A0G2K5P9_RAT	229.44	28	28	195680	42	1	60	Carbamidomethylation
6	21	P32551|QCR2_RAT	225.37	26	26	68036000	35	35	111		48396	Cytochrome b-c1 complex subunit 2 mitochondrial OS=Rattus norvegicus OX=10116 GN=Uqcrc2 PE=1 SV=2
24	218	P63039|CH60_RAT	222.92	27	27	20130000	26	26	36	Oxidation (M)	60956	60 kDa heat shock protein mitochondrial OS=Rattus norvegicus OX=10116 GN=Hspd1 PE=1 SV=1
24	219	tr|A0A482IDN3|A0A482IDN3_RAT	222.92	27	27	20130000	26	26	36	Oxidation (M)	60956	Hsp60 OS=Rattus norvegicus OX=10116 GN=Hspd1 PE=2 SV=1
18	50	Q02253|MMSA_RAT	221.29	27	27	15378000	30	29	47	Carbamidomethylation		Methylmalonate-semialdehyde dehydrogenase [acylating], mitochondrial
18	51	tr|G3V7J0|G3V7J0_RAT	221.29	27	27	15378000	30	29	47	Carbamidomethylation
23	124	tr|A0A411P2K0|A0A411P2K0_RAT	220.22	30	30	6186400	27	4	39	Oxidation (M)	42238	Cytochrome b (Fragment) OS=Rattus norvegicus OX=10116 GN=Cytb PE=3 SV=1
23	67	tr|L0L4L8|L0L4L8_RAT	220.22	30	30	6186400	27	4	39	Oxidation (M)	42470	Cytochrome b (Fragment) OS=Rattus norvegicus OX=10116 GN=cytb PE=3 SV=1
23	68	tr|A0A140GE10|A0A140GE10_RAT	220.22	30	30	6186400	27	4	39	Oxidation (M)	42574	Cytochrome b (Fragment) OS=Rattus norvegicus OX=10116 PE=3 SV=1
23	69	tr|A0A140GE11|A0A140GE11_RAT	220.22	30	30	6186400	27	4	39	Oxidation (M)	42588	Cytochrome b (Fragment) OS=Rattus norvegicus OX=10116 PE=3 SV=1
23	125	tr|A0A385HCC9|A0A385HCC9_RAT	220.22	30	30	6186400	27	4	39	Oxidation (M)	42766	Cytochrome b (Fragment) OS=Rattus norvegicus OX=10116 PE=3 SV=1
23	71	tr|A0A3Q8AGE8|A0A3Q8AGE8_RAT	220.22	30	30	6186400	27	4	39	Oxidation (M)	42712	Cytochrome b (Fragment) OS=Rattus norvegicus OX=10116 GN=Cytb PE=3 SV=1
23	72	tr|A0A3Q8AC68|A0A3Q8AC68_RAT	220.22	30	30	6186400	27	4	39	Oxidation (M)	42622	Cytochrome b (Fragment) OS=Rattus norvegicus OX=10116 GN=Cytb PE=3 SV=1
23	74	tr|A0A3S6FM15|A0A3S6FM15_RAT	220.22	30	30	6186400	27	4	39	Oxidation (M)	42698	Cytochrome b (Fragment) OS=Rattus norvegicus OX=10116 GN=Cytb PE=3 SV=1
23	76	tr|A0A220D9Z6|A0A220D9Z6_RAT	220.22	30	30	6186400	27	4	39	Oxidation (M)	43018	Cytochrome b OS=Rattus norvegicus OX=10116 PE=3 SV=1
23	78	tr|D6NSS6|D6NSS6_RAT	220.22	30	30	6186400	27	4	39	Oxidation (M)	42993	Cytochrome b (Fragment) OS=Rattus norvegicus OX=10116 GN=cytb PE=3 SV=1
23	80	tr|D6NSR3|D6NSR3_RAT	220.22	30	30	6186400	27	4	39	Oxidation (M)	42986	Cytochrome b (Fragment) OS=Rattus norvegicus OX=10116 GN=cytb PE=3 SV=1
23	127	tr|D6NSP4|D6NSP4_RAT	220.22	30	30	6186400	27	4	39	Oxidation (M)	43016	Cytochrome b (Fragment) OS=Rattus norvegicus OX=10116 GN=cytb PE=3 SV=1
23	82	tr|D6NSR8|D6NSR8_RAT	220.22	30	30	6186400	27	4	39	Oxidation (M)	42998	Cytochrome b (Fragment) OS=Rattus norvegicus OX=10116 GN=cytb PE=3 SV=1
23	84	tr|A0A0A1FZ42|A0A0A1FZ42_RAT	220.22	30	30	6186400	27	4	39	Oxidation (M)	42989	Cytochrome b OS=Rattus norvegicus OX=10116 GN=CYTB PE=3 SV=1
23	85	tr|D6NSS7|D6NSS7_RAT	220.22	30	30	6186400	27	4	39	Oxidation (M)	42948	Cytochrome b (Fragment) OS=Rattus norvegicus OX=10116 GN=cytb PE=3 SV=1
23	86	tr|Q8SEY9|Q8SEY9_RAT	220.22	30	30	6186400	27	4	39	Oxidation (M)	43015	Cytochrome b OS=Rattus norvegicus OX=10116 GN=cytb PE=3 SV=1
23	87	tr|D6NSR7|D6NSR7_RAT	220.22	30	30	6186400	27	4	39	Oxidation (M)	42982	Cytochrome b (Fragment) OS=Rattus norvegicus OX=10116 GN=cytb PE=3 SV=1
23	88	tr|A0A220DA44|A0A220DA44_RAT	220.22	30	30	6186400	27	4	39	Oxidation (M)	42968	Cytochrome b OS=Rattus norvegicus OX=10116 PE=3 SV=1
23	116	tr|D6NSQ0|D6NSQ0_RAT	220.22	30	30	6186400	27	4	39	Oxidation (M)	42968	Cytochrome b (Fragment) OS=Rattus norvegicus OX=10116 GN=cytb PE=3 SV=1
23	91	tr|Q5UAI7|Q5UAI7_RAT	220.22	30	30	6186400	27	4	39	Oxidation (M)	42998	Cytochrome b OS=Rattus norvegicus OX=10116 GN=CYTB PE=3 SV=1
23	128	tr|D6NSR2|D6NSR2_RAT	220.22	30	30	6186400	27	4	39	Oxidation (M)	43073	Cytochrome b (Fragment) OS=Rattus norvegicus OX=10116 GN=cytb PE=3 SV=1
23	129	tr|D6NSR1|D6NSR1_RAT	220.22	30	30	6186400	27	4	39	Oxidation (M)	43002	Cytochrome b (Fragment) OS=Rattus norvegicus OX=10116 GN=cytb PE=3 SV=1
23	93	tr|Q8HIC4|Q8HIC4_RAT	220.22	30	30	6186400	27	4	39	Oxidation (M)	43012	Cytochrome b OS=Rattus norvegicus OX=10116 GN=Mt-cyb PE=3 SV=1
23	94	tr|A0A220DA02|A0A220DA02_RAT	220.22	30	30	6186400	27	4	39	Oxidation (M)	42968	Cytochrome b OS=Rattus norvegicus OX=10116 PE=3 SV=1
23	95	tr|A0A0S1Z1V4|A0A0S1Z1V4_RAT	220.22	30	30	6186400	27	4	39	Oxidation (M)	43016	Cytochrome b OS=Rattus norvegicus OX=10116 GN=CYTB PE=3 SV=1
23	97	P00159|CYB_RAT	220.22	30	30	6186400	27	4	39	Oxidation (M)	43012	Cytochrome b OS=Rattus norvegicus OX=10116 GN=Mt-Cyb PE=3 SV=3
23	98	tr|L0N311|L0N311_RAT	220.22	30	30	6186400	27	4	39	Oxidation (M)	43045	Cytochrome b (Fragment) OS=Rattus norvegicus OX=10116 GN=cytb PE=3 SV=1
23	99	tr|A0A220DA28|A0A220DA28_RAT	220.22	30	30	6186400	27	4	39	Oxidation (M)	42970	Cytochrome b OS=Rattus norvegicus OX=10116 PE=3 SV=1
23	100	tr|H2KXA0|H2KXA0_RAT	220.22	30	30	6186400	27	4	39	Oxidation (M)	42978	Cytochrome b (Fragment) OS=Rattus norvegicus OX=10116 GN=cytb PE=3 SV=1
27	126	tr|A0A385HC93|A0A385HC93_RAT	214.87	26	26	347190	24	1	34		42751	Cytochrome b (Fragment) OS=Rattus norvegicus OX=10116 PE=3 SV=1
34	44	P11240|COX5A_RAT	214.03	39	39	12743000	13	13	20		16130	Cytochrome c oxidase subunit 5A mitochondrial OS=Rattus norvegicus OX=10116 GN=Cox5a PE=1 SV=1
20	22	tr|Q68G44|Q68G44_RAT	202.94	28	28	18945000	33	33	45		56886	3-hydroxy-3-methylglutaryl coenzyme A synthase OS=Rattus norvegicus OX=10116 GN=Hmgcs2 PE=1 SV=1
40	136	P24329|THTR_RAT	202.33	16	16	7060500	11	11	15		33407	Thiosulfate sulfurtransferase OS=Rattus norvegicus OX=10116 GN=Tst PE=1 SV=3
17	246	P19511|AT5F1_RAT	200.27	23	23	49933000	24	24	51		28869	ATP synthase F(0) complex subunit B1 mitochondrial OS=Rattus norvegicus OX=10116 GN=Atp5pb PE=1 SV=1
38	201	P45953|ACADV_RAT	181.03	12	12	3354300	12	11	15		70749	Very long-chain specific acyl-CoA dehydrogenase mitochondrial OS=Rattus norvegicus OX=10116 GN=Acadvl PE=1 SV=1
38	202	tr|Q5M9H2|Q5M9H2_RAT	181.03	12	12	3354300	12	11	15		70821	Acyl-Coenzyme A dehydrogenase very long chain OS=Rattus norvegicus OX=10116 GN=Acadvl PE=1 SV=1
33	3	P85834|EFTU_RAT	178.71	18	18	7831900	15	15	23		49522	Elongation factor Tu mitochondrial OS=Rattus norvegicus OX=10116 GN=Tufm PE=1 SV=1
25	54	P18163|ACSL1_RAT	168.05	17	17	17266000	22	22	35	Oxidation (M)	78179	Long-chain-fatty-acid--CoA ligase 1 OS=Rattus norvegicus OX=10116 GN=Acsl1 PE=1 SV=1
35	35	P17764|THIL_RAT	165.28	18	18	9879500	12	12	19		44695	Acetyl-CoA acetyltransferase mitochondrial OS=Rattus norvegicus OX=10116 GN=Acat1 PE=1 SV=1
21	6258	tr|Q68FZ8|Q68FZ8_RAT	162.08	24	24	18128000	28	28	42	Carbamidomethylation		Propionyl coenzyme A carboxylase, beta polypeptide
32	1646	Q6PDU7|ATP5L_RAT	157.92	38	38	16106000	12	11	23	Oxidation (M)	11433	ATP synthase subunit g mitochondrial OS=Rattus norvegicus OX=10116 GN=Atp5mg PE=1 SV=2
61	277	tr|B2RZ24|B2RZ24_RAT	157.69	5	5	839440	4	4	5		47388	Succinate-CoA ligase subunit beta (Fragment) OS=Rattus norvegicus OX=10116 GN=Sucla2 PE=2 SV=1
61	278	tr|F1LM47|F1LM47_RAT	157.69	5	5	839440	4	4	5		50306	Succinate--CoA ligase [ADP-forming] subunit beta mitochondrial OS=Rattus norvegicus OX=10116 GN=Sucla2 PE=1 SV=1
31	46	P13086|SUCA_RAT	152.5	22	22	7816700	15	15	23		36148	Succinate--CoA ligase [ADP/GDP-forming] subunit alpha mitochondrial OS=Rattus norvegicus OX=10116 GN=Suclg1 PE=2 SV=2
31	47	tr|A0A0H2UHE1|A0A0H2UHE1_RAT	152.5	21	21	7816700	15	15	23		37560	Succinate--CoA ligase [ADP/GDP-forming] subunit alpha mitochondrial OS=Rattus norvegicus OX=10116 GN=Suclg1 PE=1 SV=1
43	52	tr|M0RAM5|M0RAM5_RAT	150.63	25	25	3408700	10	10	14		22155	Glutathione peroxidase OS=Rattus norvegicus OX=10116 GN=Gpx1 PE=1 SV=1
43	53	P04041|GPX1_RAT	150.63	25	25	3408700	10	10	14		22305	Glutathione peroxidase 1 OS=Rattus norvegicus OX=10116 GN=Gpx1 PE=1 SV=4
41	115	tr|A0A0G2JVH4|A0A0G2JVH4_RAT	150.14	11	11	3153600	11	11	14		86230	MICOS complex subunit MIC60 OS=Rattus norvegicus OX=10116 GN=Immt PE=1 SV=1
39	11785	B3DMA2|ACD11_RAT	149.24	10	10	4580000	13	11	15	Oxidation (M)	87371	Acyl-CoA dehydrogenase family member 11 OS=Rattus norvegicus OX=10116 GN=Acad11 PE=1 SV=1
28	5802	Q06647|ATPO_RAT	147.56	31	31	12022000	18	17	29	Carbamidomethylation		ATP synthase subunit O, mitochondrial
30	352	P0C2X9|AL4A1_RAT	144.1	19	19	8628800	16	15	26		61869	Delta-1-pyrroline-5-carboxylate dehydrogenase mitochondrial OS=Rattus norvegicus OX=10116 GN=Aldh4a1 PE=1 SV=1
29	111	tr|S5RZM8|S5RZM8_RAT	142.74	40	40	14490000	18	18	28	Oxidation (M)	25958	Cytochrome c oxidase subunit 2 OS=Rattus norvegicus OX=10116 GN=COX2 PE=3 SV=1
29	112	P00406|COX2_RAT	142.74	40	40	14490000	18	18	28	Oxidation (M)	25928	Cytochrome c oxidase subunit 2 OS=Rattus norvegicus OX=10116 GN=Mtco2 PE=1 SV=3
29	104	tr|Q5UAJ6|Q5UAJ6_RAT	142.74	40	40	14490000	18	18	28	Oxidation (M)	25942	Cytochrome c oxidase subunit 2 OS=Rattus norvegicus OX=10116 GN=COX2 PE=3 SV=1
29	113	tr|Q8SEZ5|Q8SEZ5_RAT	142.74	40	40	14490000	18	18	28	Oxidation (M)	25928	Cytochrome c oxidase subunit 2 OS=Rattus norvegicus OX=10116 GN=Mt-co2 PE=1 SV=1
29	114	tr|A0A097PE04|A0A097PE04_RAT	142.74	40	40	14490000	18	18	28	Oxidation (M)	25894	Cytochrome c oxidase subunit 2 OS=Rattus norvegicus OX=10116 GN=COX2 PE=3 SV=1
37	350	tr|G3V7Y3|G3V7Y3_RAT	135.6	23	23	11525000	12	12	17	Oxidation (M)	17563	ATP synthase subunit delta mitochondrial OS=Rattus norvegicus OX=10116 GN=Atp5f1d PE=1 SV=1
37	314	tr|B1WBP7|B1WBP7_RAT	135.6	31	31	11525000	12	12	17	Oxidation (M)	12884	ATP synthase subunit delta mitochondrial OS=Rattus norvegicus OX=10116 GN=Atp5f1d PE=1 SV=1
49	377	P80431|COX7B_RAT	130.02	30	30	3737000	5	5	8		8995	Cytochrome c oxidase subunit 7B mitochondrial OS=Rattus norvegicus OX=10116 GN=Cox7b PE=1 SV=3
36	307	P16970|ABCD3_RAT	125.83	17	17	9130700	16	16	17		75316	ATP-binding cassette sub-family D member 3 OS=Rattus norvegicus OX=10116 GN=Abcd3 PE=1 SV=3
42	238	tr|B2RYT5|B2RYT5_RAT	124.03	34	34	7201300	10	9	14		12651	Cox7a2l protein OS=Rattus norvegicus OX=10116 GN=Cox7a2l PE=2 SV=1
54	1891	P04636|MDHM_RAT	115.81	12	12	1223300	6	6	6		35684	Malate dehydrogenase mitochondrial OS=Rattus norvegicus OX=10116 GN=Mdh2 PE=1 SV=2
47	61	P29147|BDH_RAT	113.62	8	8	2156100	6	5	9		38202	D-beta-hydroxybutyrate dehydrogenase mitochondrial OS=Rattus norvegicus OX=10116 GN=Bdh1 PE=1 SV=2
47	62	tr|A0A0G2JSH2|A0A0G2JSH2_RAT	113.62	8	8	2156100	6	5	9		38333	3-hydroxybutyrate dehydrogenase type 1 isoform CRA_a OS=Rattus norvegicus OX=10116 GN=Bdh1 PE=1 SV=1
57	338	Q5M9I5|QCR6_RAT	109.84	18	18	4662600	4	4	6		10424	Cytochrome b-c1 complex subunit 6 mitochondrial OS=Rattus norvegicus OX=10116 GN=Uqcrh PE=3 SV=1
74	5862	tr|G3V7I0|G3V7I0_RAT	109.69	12	12	2078500	4	4	4		28299	Peroxiredoxin 3 OS=Rattus norvegicus OX=10116 GN=Prdx3 PE=1 SV=1
74	5863	Q9Z0V6|PRDX3_RAT	109.69	12	12	2078500	4	4	4		28295	Thioredoxin-dependent peroxide reductase mitochondrial OS=Rattus norvegicus OX=10116 GN=Prdx3 PE=1 SV=2
48	241	tr|Q06QA9|Q06QA9_RAT	109.06	11	11	1395900	8	8	8		56893	Cytochrome c oxidase subunit 1 OS=Rattus norvegicus OX=10116 GN=CO1 PE=3 SV=1
48	229	tr|Q06QK0|Q06QK0_RAT	109.06	11	11	1395900	8	8	8		56880	Cytochrome c oxidase subunit 1 OS=Rattus norvegicus OX=10116 GN=CO1 PE=3 SV=1
48	230	tr|Q8SEZ6|Q8SEZ6_RAT	109.06	11	11	1395900	8	8	8		56879	Cytochrome c oxidase subunit 1 OS=Rattus norvegicus OX=10116 GN=COI PE=3 SV=1
48	231	tr|A0A0A1FZ34|A0A0A1FZ34_RAT	109.06	11	11	1395900	8	8	8		56937	Cytochrome c oxidase subunit 1 OS=Rattus norvegicus OX=10116 GN=COX1 PE=3 SV=1
48	232	tr|Q8HIC9|Q8HIC9_RAT	109.06	11	11	1395900	8	8	8		56845	Cytochrome c oxidase subunit 1 OS=Rattus norvegicus OX=10116 GN=Mt-co1 PE=3 SV=1
48	233	P05503|COX1_RAT	109.06	11	11	1395900	8	8	8		56845	Cytochrome c oxidase subunit 1 OS=Rattus norvegicus OX=10116 GN=Mtco1 PE=2 SV=3
48	234	tr|Q95938|Q95938_RAT	109.06	11	11	1395900	8	8	8		56977	Cytochrome c oxidase subunit 1 OS=Rattus norvegicus OX=10116 GN=Co I PE=3 SV=1
77	137	tr|D4A7L4|D4A7L4_RAT	107.65	9	9	631960	3	3	4		17634	NADH dehydrogenase (Ubiquinone) 1 beta subcomplex 11 (Predicted) OS=Rattus norvegicus OX=10116 GN=Ndufb11 PE=1 SV=1
66	1617	Q5RJR8|LRC59_RAT	105.06	7	7	528520	4	4	4		34869	Leucine-rich repeat-containing protein 59 OS=Rattus norvegicus OX=10116 GN=Lrrc59 PE=1 SV=1
53	1095	tr|Q5UAJ5|Q5UAJ5_RAT	100.41	30	30	7490100	4	4	7	Oxidation (M)	7642	ATP synthase protein 8 OS=Rattus norvegicus OX=10116 GN=ATP8 PE=3 SV=1
53	1097	tr|Q8SEZ4|Q8SEZ4_RAT	100.41	30	30	7490100	4	4	7	Oxidation (M)	7632	ATP synthase protein 8 OS=Rattus norvegicus OX=10116 GN=ATPase8 PE=3 SV=1
64	240	A0A0G2K047|ACSS3_RAT	98.95	5	5	554130	4	4	4		74675	Acyl-CoA synthetase short-chain family member 3 mitochondrial OS=Rattus norvegicus OX=10116 GN=Acss3 PE=1 SV=1
59	19	Q641Y2|NDUS2_RAT	97.98	10	10	9227400	5	5	5		52562	NADH dehydrogenase [ubiquinone] iron-sulfur protein 2 mitochondrial OS=Rattus norvegicus OX=10116 GN=Ndufs2 PE=1 SV=1
51	1322	P32198|CPT1A_RAT	97.71	6	6	1611700	5	5	7		88126	Carnitine O-palmitoyltransferase 1 liver isoform OS=Rattus norvegicus OX=10116 GN=Cpt1a PE=1 SV=2
52	247	P10888|COX41_RAT	95.59	17	17	3911100	6	6	7		19515	Cytochrome c oxidase subunit 4 isoform 1 mitochondrial OS=Rattus norvegicus OX=10116 GN=Cox4i1 PE=1 SV=1
67	59	P17178|CP27A_RAT	95.03	10	10	88246	4	4	4		60733	Sterol 26-hydroxylase mitochondrial OS=Rattus norvegicus OX=10116 GN=Cyp27a1 PE=1 SV=1
67	60	tr|A0A0H2UHN7|A0A0H2UHN7_RAT	95.03	10	10	88246	4	4	4		62492	RCG24013 isoform CRA_a OS=Rattus norvegicus OX=10116 GN=Cyp27a1 PE=1 SV=1
69	725	tr|F1LP30|F1LP30_RAT	89.44	3	3	106100	3	1	4		79296	Methylcrotonoyl-CoA carboxylase subunit alpha mitochondrial OS=Rattus norvegicus OX=10116 GN=Mccc1 PE=1 SV=1
69	726	Q5I0C3|MCCA_RAT	89.44	3	3	106100	3	1	4		79330	Methylcrotonoyl-CoA carboxylase subunit alpha mitochondrial OS=Rattus norvegicus OX=10116 GN=Mccc1 PE=1 SV=1
44	322	P12075|COX5B_RAT	89.05	22	22	12571000	7	7	11		13915	Cytochrome c oxidase subunit 5B mitochondrial OS=Rattus norvegicus OX=10116 GN=Cox5b PE=1 SV=2
55	207	tr|G3V6I4|G3V6I4_RAT	87.31	5	5	867530	3	3	6		37791	Mitochondrial amidoxime reducing component 1 OS=Rattus norvegicus OX=10116 GN=Marc1 PE=1 SV=1
58	14	tr|F1LN92|F1LN92_RAT	84.72	5	5	5081200	4	4	5		89352	AFG3-like matrix AAA peptidase subunit 2 OS=Rattus norvegicus OX=10116 GN=Afg3l2 PE=1 SV=1
60	190	P07824|ARGI1_RAT	84.56	13	13	1236100	4	3	5		34973	Arginase-1 OS=Rattus norvegicus OX=10116 GN=Arg1 PE=1 SV=2
46	134	tr|B2RYS2|B2RYS2_RAT	84.22	37	37	5038500	7	6	9	Oxidation (M)	13559	Cytochrome b-c1 complex subunit 7 OS=Rattus norvegicus OX=10116 GN=Uqcrb PE=1 SV=1
45	250	P08011|MGST1_RAT	84.15	23	23	2064600	8	8	9		17472	Microsomal glutathione S-transferase 1 OS=Rattus norvegicus OX=10116 GN=Mgst1 PE=1 SV=3
45	251	tr|B6DYQ4|B6DYQ4_RAT	84.15	23	23	2064600	8	8	9		17472	Microsomal glutathione S-transferase OS=Rattus norvegicus OX=10116 GN=Mgst1 PE=2 SV=1
62	244	P09139|SPYA_RAT	83.27	7	7	829570	4	4	5		45834	Serine--pyruvate aminotransferase mitochondrial OS=Rattus norvegicus OX=10116 GN=Agxt PE=1 SV=1
88	15	P67779|PHB_RAT	79.81	10	10	527270	3	3	3		29820	Prohibitin OS=Rattus norvegicus OX=10116 GN=Phb PE=1 SV=1
70	139	Q6AXV4|SAM50_RAT	78.98	10	10	1474700	4	4	4		51960	Sorting and assembly machinery component 50 homolog OS=Rattus norvegicus OX=10116 GN=Samm50 PE=1 SV=1
91	298	P11951|CX6C2_RAT	77.94	24	24	828770	3	3	3		8455	Cytochrome c oxidase subunit 6C-2 OS=Rattus norvegicus OX=10116 GN=Cox6c2 PE=1 SV=3
128	1959	tr|A0A0G2K059|A0A0G2K059_RAT	73.21	6	6	489190	2	2	2		36057	Mitochondrial calcium uniporter OS=Rattus norvegicus OX=10116 GN=Mcu PE=1 SV=1
128	1960	tr|M0RDI5|M0RDI5_RAT	73.21	6	6	489190	2	2	2		39758	Mitochondrial calcium uniporter OS=Rattus norvegicus OX=10116 GN=Mcu PE=1 SV=1
71	255	tr|I6V4L9|I6V4L9_RAT	71.43	7	7	253730	3	3	4		29844	Cytochrome c oxidase subunit 3 OS=Rattus norvegicus OX=10116 GN=COX3 PE=3 SV=1
71	388	tr|Q7H115|Q7H115_RAT	71.43	7	7	253730	3	3	4		29871	Cytochrome c oxidase subunit 3 OS=Rattus norvegicus OX=10116 GN=Mt-co3 PE=3 SV=1
71	389	tr|Q8M7G4|Q8M7G4_RAT	71.43	7	7	253730	3	3	4		29861	Cytochrome c oxidase subunit 3 OS=Rattus norvegicus OX=10116 PE=2 SV=1
71	390	tr|A0A096XKT2|A0A096XKT2_RAT	71.43	7	7	253730	3	3	4		29901	Cytochrome c oxidase subunit 3 OS=Rattus norvegicus OX=10116 GN=COX3 PE=3 SV=1
71	391	P05505|COX3_RAT	71.43	7	7	253730	3	3	4		29871	Cytochrome c oxidase subunit 3 OS=Rattus norvegicus OX=10116 GN=Mtco3 PE=1 SV=5
71	392	tr|Q8SEZ2|Q8SEZ2_RAT	71.43	7	7	253730	3	3	4		29870	Cytochrome c oxidase subunit 3 (Fragment) OS=Rattus norvegicus OX=10116 GN=COIII PE=3 SV=1
75	140	tr|F1LN88|F1LN88_RAT	71.07	6	6	418360	3	2	4		56517	Aldehyde dehydrogenase mitochondrial OS=Rattus norvegicus OX=10116 GN=Aldh2 PE=1 SV=2
75	141	P11884|ALDH2_RAT	71.07	6	6	418360	3	2	4		56488	Aldehyde dehydrogenase mitochondrial OS=Rattus norvegicus OX=10116 GN=Aldh2 PE=1 SV=1
68	358	P06761|BIP_RAT	70.39	5	5	937050	4	4	4	Formylation	72347	Endoplasmic reticulum chaperone BiP OS=Rattus norvegicus OX=10116 GN=Hspa5 PE=1 SV=1
50	188	O70351|HCD2_RAT	69.72	17	17	1339300	5	5	7		27246	3-hydroxyacyl-CoA dehydrogenase type-2 OS=Rattus norvegicus OX=10116 GN=Hsd17b10 PE=1 SV=3
50	189	tr|B0BMW2|B0BMW2_RAT	69.72	17	17	1339300	5	5	7		27250	3-hydroxyacyl-CoA dehydrogenase type-2 OS=Rattus norvegicus OX=10116 GN=Hsd17b10 PE=1 SV=1
95	5817	P21571|ATP5J_RAT	68.32	19	19	1038900	2	2	3		12494	ATP synthase-coupling factor 6 mitochondrial OS=Rattus norvegicus OX=10116 GN=Atp5pf PE=1 SV=1
85	28	tr|D3ZG43|D3ZG43_RAT	67.43	9	9	1083300	3	3	3		30226	NADH dehydrogenase (Ubiquinone) Fe-S protein 3 (Predicted) isoform CRA_c OS=Rattus norvegicus OX=10116 GN=Ndufs3 PE=1 SV=1
56	286	Q7TQ16|QCR8_RAT	65.99	35	35	1273100	4	4	6		9849	Cytochrome b-c1 complex subunit 8 OS=Rattus norvegicus OX=10116 GN=Uqcrq PE=3 SV=1
106	342	tr|Q2TVU3|Q2TVU3_RAT	65.97	3	3	276120	2	2	2		49412	TID1 OS=Rattus norvegicus OX=10116 GN=Dnaja3 PE=2 SV=1
106	343	tr|A0A0G2K4Y1|A0A0G2K4Y1_RAT	65.97	3	3	276120	2	2	2		49416	DnaJ heat shock protein family (Hsp40) member A3 OS=Rattus norvegicus OX=10116 GN=Dnaja3 PE=1 SV=1
106	344	tr|Q2UZS7|Q2UZS7_RAT	65.97	3	3	276120	2	2	2		52399	Tid-1 long isoform OS=Rattus norvegicus OX=10116 GN=Dnaja3 PE=2 SV=1
106	345	tr|A0A0G2K5E4|A0A0G2K5E4_RAT	65.97	3	3	276120	2	2	2		52403	DnaJ heat shock protein family (Hsp40) member A3 OS=Rattus norvegicus OX=10116 GN=Dnaja3 PE=1 SV=1
106	341	tr|G3V6I5|G3V6I5_RAT	65.97	3	3	276120	2	2	2		46777	DnaJ heat shock protein family (Hsp40) member A3 OS=Rattus norvegicus OX=10116 GN=Dnaja3 PE=1 SV=2
72	283	Q9WVK3|PECR_RAT	65.08	9	9	1917600	4	4	4	Oxidation (M)	32433	Peroxisomal trans-2-enoyl-CoA reductase OS=Rattus norvegicus OX=10116 GN=Pecr PE=2 SV=1
72	284	tr|A0A0G2JVG4|A0A0G2JVG4_RAT	65.08	9	9	1917600	4	4	4	Oxidation (M)	32737	Peroxisomal trans-2-enoyl-CoA reductase OS=Rattus norvegicus OX=10116 GN=Pecr PE=1 SV=1
81	48	tr|D3ZF13|D3ZF13_RAT	65.04	16	16	215220	3	3	3		17514	Acyl carrier protein OS=Rattus norvegicus OX=10116 GN=Ndufab1 PE=1 SV=1
126	5788	tr|Q3B8N9|Q3B8N9_RAT	64.97	6	6	533490	2	2	2		32823	Biphenyl hydrolase-like OS=Rattus norvegicus OX=10116 GN=Bphl PE=1 SV=1
127	58	tr|D4A565|D4A565_RAT	61.95	13	13	654160	2	2	2		21664	NADH dehydrogenase (Ubiquinone) 1 beta subcomplex 5 (Predicted) isoform CRA_b OS=Rattus norvegicus OX=10116 GN=Ndufb5 PE=1 SV=1
87	143	tr|Q5EBA4|Q5EBA4_RAT	59.59	7	7	1086400	3	3	3		33215	Nipsnap1 protein (Fragment) OS=Rattus norvegicus OX=10116 GN=Nipsnap1 PE=2 SV=1
87	144	tr|G3V728|G3V728_RAT	59.59	7	7	1086400	3	3	3		33346	4-nitrophenylphosphatase domain and non-neuronal SNAP25-like protein homolog 1 (C. elegans) isoform CRA_b OS=Rattus norvegicus OX=10116 GN=Nipsnap1 PE=1 SV=1
129	11921	Q9Z2L0|VDAC1_RAT	59.29	6	6	495100	2	2	2		30756	Voltage-dependent anion-selective channel protein 1 OS=Rattus norvegicus OX=10116 GN=Vdac1 PE=1 SV=4
96	300	Q5PQT3|GLYAT_RAT	58.51	8	8	110200	3	3	3		33899	Glycine N-acyltransferase OS=Rattus norvegicus OX=10116 GN=Glyat PE=2 SV=1
96	301	tr|A4PB92|A4PB92_RAT	58.51	8	8	110200	3	3	3		33899	Glycine N-acyltransferase OS=Rattus norvegicus OX=10116 GN=Glyat PE=2 SV=1
96	302	tr|A0A0G2JWI5|A0A0G2JWI5_RAT	58.51	7	7	110200	3	3	3		39453	Glycine N-acyltransferase OS=Rattus norvegicus OX=10116 GN=Glyat PE=1 SV=1
90	446	Q91XJ1|BECN1_RAT	58.34	3	3		3	0	3		51557	Beclin-1 OS=Rattus norvegicus OX=10116 GN=Becn1 PE=1 SV=1
108	66	tr|D4A0T0|D4A0T0_RAT	58.03	16	16	1065600	2	2	2		20859	NADH:ubiquinone oxidoreductase subunit B10 OS=Rattus norvegicus OX=10116 GN=Ndufb10 PE=1 SV=1
224	6486	tr|D3ZBM3|D3ZBM3_RAT	57.69	3	3	282620	1	1	1		47552	Ferrochelatase OS=Rattus norvegicus OX=10116 GN=Fech PE=1 SV=1
115	426	tr|A0A0G2K1Q1|A0A0G2K1Q1_RAT	56.31	2	2	198350	2	1	2		107334	NLR family member X1 OS=Rattus norvegicus OX=10116 GN=Nlrx1 PE=1 SV=1
115	427	Q5FVQ8|NLRX1_RAT	56.31	2	2	198350	2	1	2		107590	NLR family member X1 OS=Rattus norvegicus OX=10116 GN=Nlrx1 PE=2 SV=1
63	11740	P29419|ATP5I_RAT	54.82	27	27	2017400	2	2	5		8255	ATP synthase subunit e mitochondrial OS=Rattus norvegicus OX=10116 GN=Atp5me PE=1 SV=3
116	5782	Q09073|ADT2_RAT	53.71	5	5	2204300	2	2	2		32901	ADP/ATP translocase 2 OS=Rattus norvegicus OX=10116 GN=Slc25a5 PE=1 SV=3
132	253	Q9ER34|ACON_RAT	53.25	4	4	507360	2	2	2		85433	Aconitate hydratase mitochondrial OS=Rattus norvegicus OX=10116 GN=Aco2 PE=1 SV=2
269	309	P22071|3BHS1_RAT	52.58	3	3	438990	1	1	1		42037	3 beta-hydroxysteroid dehydrogenase/Delta 5-->4-isomerase type 1 OS=Rattus norvegicus OX=10116 GN=Hsd3b1 PE=1 SV=3
269	310	P22072|3BHS2_RAT	52.58	3	3	438990	1	1	1		42277	3 beta-hydroxysteroid dehydrogenase/Delta 5-->4-isomerase type 2 OS=Rattus norvegicus OX=10116 GN=Hsd3b PE=2 SV=3
269	311	P27364|3BHS5_RAT	52.58	3	3	438990	1	1	1		42206	NADPH-dependent 3-keto-steroid reductase Hsd3b5 OS=Rattus norvegicus OX=10116 GN=Hsd3b5 PE=1 SV=3
135	321	tr|Q5BJZ3|Q5BJZ3_RAT	52.15	2	2	235710	2	2	2		113869	Nicotinamide nucleotide transhydrogenase OS=Rattus norvegicus OX=10116 GN=Nnt PE=1 SV=1
133	49	tr|B2RYS8|B2RYS8_RAT	51.68	13	13	636320	2	2	2		21959	NADH dehydrogenase [ubiquinone] 1 beta subcomplex subunit 8 mitochondrial OS=Rattus norvegicus OX=10116 GN=Ndufb8 PE=1 SV=1
134	191	P02770|ALBU_RAT	51.19	3	3	476080	2	2	2	Formylation	68731	Serum albumin OS=Rattus norvegicus OX=10116 GN=Alb PE=1 SV=2
134	192	tr|A0A0G2JSH5|A0A0G2JSH5_RAT	51.19	3	3	476080	2	2	2	Formylation	68759	Serum albumin OS=Rattus norvegicus OX=10116 GN=Alb PE=1 SV=1
219	34	tr|A0A0G2JVL6|A0A0G2JVL6_RAT	50.91	7	7	295400	1	1	1		19965	NADH dehydrogenase [ubiquinone] 1 alpha subcomplex subunit 8 OS=Rattus norvegicus OX=10116 GN=Ndufa8 PE=1 SV=1
131	210	tr|Q5M949|Q5M949_RAT	50.51	6	6	395380	2	2	2		28340	Nipsnap homolog 3A (C. elegans) OS=Rattus norvegicus OX=10116 GN=Nipsnap3b PE=1 SV=1
65	1178	tr|G3V9J8|G3V9J8_RAT	49.34	5	5	2405700	3	3	4	Formylation	87521	Glycerol-3-phosphate acyltransferase 1 mitochondrial OS=Rattus norvegicus OX=10116 GN=Gpam PE=1 SV=2
65	1179	tr|A0A0G2K2U7|A0A0G2K2U7_RAT	49.34	4	4	2405700	3	3	4	Formylation	93728	Glycerol-3-phosphate acyltransferase 1 mitochondrial OS=Rattus norvegicus OX=10116 GN=Gpam PE=1 SV=1
65	1180	P97564|GPAT1_RAT	49.34	4	4	2405700	3	3	4	Formylation	93715	Glycerol-3-phosphate acyltransferase 1 mitochondrial OS=Rattus norvegicus OX=10116 GN=Gpam PE=1 SV=3
98	353	Q9WUS0|KAD4_RAT	47.58	9	9	0	2	2	3	Formylation	25203	Adenylate kinase 4 mitochondrial OS=Rattus norvegicus OX=10116 GN=Ak4 PE=2 SV=1
139	208	P13803|ETFA_RAT	46.94	3	3	493350	1	1	2		34951	Electron transfer flavoprotein subunit alpha mitochondrial OS=Rattus norvegicus OX=10116 GN=Etfa PE=1 SV=4
73	297	Q924S5|LONM_RAT	46.64	2	2	839900	2	2	4		105792	Lon protease homolog mitochondrial OS=Rattus norvegicus OX=10116 GN=Lonp1 PE=2 SV=1
80	7	Q5BK63|NDUA9_RAT	46.48	5	5	130080	3	3	3		42559	NADH dehydrogenase [ubiquinone] 1 alpha subcomplex subunit 9 mitochondrial OS=Rattus norvegicus OX=10116 GN=Ndufa9 PE=1 SV=2
130	281	tr|F1LPV8|F1LPV8_RAT	45.62	5	5	520420	2	2	2		46639	Succinate--CoA ligase [GDP-forming] subunit beta mitochondrial OS=Rattus norvegicus OX=10116 GN=Suclg2 PE=1 SV=2
130	282	tr|B1H270|B1H270_RAT	45.62	5	5	520420	2	2	2		46988	Succinate--CoA ligase [GDP-forming] subunit beta mitochondrial OS=Rattus norvegicus OX=10116 GN=Suclg2 PE=2 SV=1
140	11743	P35171|CX7A2_RAT	45.36	11	11	109230	1	1	2		9353	Cytochrome c oxidase subunit 7A2 mitochondrial OS=Rattus norvegicus OX=10116 GN=Cox7a2 PE=1 SV=1
140	11744	tr|B2RYS0|B2RYS0_RAT	45.36	11	11	109230	1	1	2		9353	Cox7a2 protein OS=Rattus norvegicus OX=10116 GN=Cox7a2 PE=2 SV=1
76	361	P80433|COX8A_RAT	45.32	19	19	1022300	2	2	4		7672	Cytochrome c oxidase subunit 8A mitochondrial OS=Rattus norvegicus OX=10116 GN=Cox8a PE=1 SV=3
270	371	tr|B5DFA3|B5DFA3_RAT	44.08	2	2	282190	1	1	1		65357	Bucs1 protein OS=Rattus norvegicus OX=10116 GN=Acsm1 PE=2 SV=1
270	372	tr|F1M1W1|F1M1W1_RAT	44.08	2	2	282190	1	1	1		65347	Acyl-coenzyme A synthetase ACSM2 mitochondrial OS=Rattus norvegicus OX=10116 GN=Acsm1 PE=1 SV=3
270	373	tr|A0A0G2K125|A0A0G2K125_RAT	44.08	2	2	282190	1	1	1		65319	Acyl-coenzyme A synthetase ACSM2 mitochondrial OS=Rattus norvegicus OX=10116 GN=Acsm1 PE=1 SV=1
270	374	tr|A0A0G2K8G2|A0A0G2K8G2_RAT	44.08	2	2	282190	1	1	1		70943	Acyl-coenzyme A synthetase ACSM2 mitochondrial OS=Rattus norvegicus OX=10116 GN=Acsm1 PE=1 SV=1
86	1701	Q6UPE0|CHDH_RAT	42.06	5	5	329910	3	3	3		66389	Choline dehydrogenase mitochondrial OS=Rattus norvegicus OX=10116 GN=Chdh PE=1 SV=1
271	5916	Q58FK9|KAT3_RAT	41.57	3	3	39673	1	1	1		51044	Kynurenine--oxoglutarate transaminase 3 OS=Rattus norvegicus OX=10116 GN=Kyat3 PE=2 SV=1
168	306	Q2V057|HYPDH_RAT	41.1	2	2	231400	1	1	1		51002	Hydroxyproline dehydrogenase OS=Rattus norvegicus OX=10116 GN=Prodh2 PE=2 SV=1
272	17	tr|A0A0G2KB63|A0A0G2KB63_RAT	40.91	3	3	219460	1	1	1		33168	Prohibitin OS=Rattus norvegicus OX=10116 GN=Phb2 PE=1 SV=1
272	12	Q5XIH7|PHB2_RAT	40.91	3	3	219460	1	1	1		33312	Prohibitin-2 OS=Rattus norvegicus OX=10116 GN=Phb2 PE=1 SV=1
89	369	tr|G3V734|G3V734_RAT	40.26	4	4	981900	2	2	3		36133	2 4-dienoyl CoA reductase 1 mitochondrial isoform CRA_a OS=Rattus norvegicus OX=10116 GN=Decr1 PE=1 SV=1
89	370	Q64591|DECR_RAT	40.26	4	4	981900	2	2	3		36133	2 4-dienoyl-CoA reductase mitochondrial OS=Rattus norvegicus OX=10116 GN=Decr1 PE=1 SV=2
220	1716	P56522|ADRO_RAT	39.88	3	3	113690	1	1	1		54363	NADPH:adrenodoxin oxidoreductase mitochondrial OS=Rattus norvegicus OX=10116 GN=Fdxr PE=1 SV=1
273	337	P80432|COX7C_RAT	38.79	16	16	583660	1	1	1		7375	Cytochrome c oxidase subunit 7C mitochondrial OS=Rattus norvegicus OX=10116 GN=Cox7c PE=1 SV=2
97	6375	tr|D3ZTP0|D3ZTP0_RAT	38.72	3	3	395240	2	2	3		101806	10-formyltetrahydrofolate dehydrogenase OS=Rattus norvegicus OX=10116 GN=Aldh1l2 PE=1 SV=3
136	333	tr|F1LZW6|F1LZW6_RAT	38.71	3	3	0	2	2	2		54099	Solute carrier family 25 member 13 OS=Rattus norvegicus OX=10116 GN=Slc25a13 PE=1 SV=2
199	1268	Q2TA68|OPA1_RAT	38.16	1	1	0	1	1	1		111307	Dynamin-like 120 kDa protein mitochondrial OS=Rattus norvegicus OX=10116 GN=Opa1 PE=1 SV=1
152	1896	tr|D3ZMG0|D3ZMG0_RAT	37.74	1	1		2	0	2		112437	Serine/threonine-protein kinase OS=Rattus norvegicus OX=10116 GN=Ulk1 PE=1 SV=2
82	356	O70600|RSAD2_RAT	36.21	3	3	1314800	1	1	3	Formylation	41255	Radical S-adenosyl methionine domain-containing protein 2 OS=Rattus norvegicus OX=10116 GN=Rsad2 PE=1 SV=1
82	357	tr|A0A0H2UHF4|A0A0H2UHF4_RAT	36.21	3	3	1314800	1	1	3	Formylation	41444	RCG62278 OS=Rattus norvegicus OX=10116 GN=Rsad2 PE=4 SV=1
275	349	Q5I0C5|FMT_RAT	35.73	2	2	0	1	1	1	Formylation	42997	Methionyl-tRNA formyltransferase mitochondrial OS=Rattus norvegicus OX=10116 GN=Mtfmt PE=2 SV=1
110	6517	P56574|IDHP_RAT	34.89	4	4	350630	2	2	2		50967	Isocitrate dehydrogenase [NADP] mitochondrial OS=Rattus norvegicus OX=10116 GN=Idh2 PE=1 SV=2
274	193	P08461|ODP2_RAT	34.74	2	2	202760	1	1	1		67166	Dihydrolipoyllysine-residue acetyltransferase component of pyruvate dehydrogenase complex mitochondrial OS=Rattus norvegicus OX=10116 GN=Dlat PE=1 SV=3
283	590	tr|F1MAR6|F1MAR6_RAT	34.69	1	1	0	1	1	1		68095	Proline dehydrogenase OS=Rattus norvegicus OX=10116 GN=Prodh1 PE=1 SV=2
114	6174	tr|D3Z900|D3Z900_RAT	34.14	7	7	82200	2	1	2	Oxidation (M)	38239	Mitochondrial amidoxime reducing component 2 OS=Rattus norvegicus OX=10116 GN=Marc2 PE=1 SV=2
114	6175	O88994|MARC2_RAT	34.14	7	7	82200	2	1	2	Oxidation (M)	38249	Mitochondrial amidoxime reducing component 2 OS=Rattus norvegicus OX=10116 GN=Marc2 PE=2 SV=1
119	6119	A0A0G2JZ79|SIR1_RAT	34.04	3	3	1437700	2	2	2		62059	NAD-dependent protein deacetylase sirtuin-1 OS=Rattus norvegicus OX=10116 GN=Sirt1 PE=3 SV=2
119	6120	tr|A0A182DWI7|A0A182DWI7_RAT	34.04	2	2	1437700	2	2	2		81778	NAD-dependent protein deacetylase sirtuin-1 OS=Rattus norvegicus OX=10116 GN=Sirt1 PE=4 SV=1
100	531	tr|D3ZHK4|D3ZHK4_RAT	33.55	1	1		2	0	3		182226	RB1-inducible coiled-coil 1 OS=Rattus norvegicus OX=10116 GN=Rb1cc1 PE=1 SV=1
120	656	tr|D3ZD23|D3ZD23_RAT	32.62	1	1	546370	2	2	2		67300	ATP-binding cassette subfamily E member 1 OS=Rattus norvegicus OX=10116 GN=Abce1 PE=1 SV=1
276	28531	Q5I0I4|DMAC2_RAT	31.92	6	6	173270	1	1	1		28508	Distal membrane-arm assembly complex protein 2 OS=Rattus norvegicus OX=10116 GN=Dmac2 PE=2 SV=1
118	745	F8WLE0|KIF28_RAT	31.81	2	2	841390	2	1	2		115542	Kinesin-like protein KIF28P OS=Rattus norvegicus OX=10116 GN=Kif28p PE=2 SV=1
99	514	tr|Q5RKL4|Q5RKL4_RAT	31.23	1	1	0	1	1	3		95977	Dimethylglycine dehydrogenase OS=Rattus norvegicus OX=10116 GN=Dmgdh PE=1 SV=1
99	515	Q63342|M2GD_RAT	31.23	1	1	0	1	1	3		96047	Dimethylglycine dehydrogenase mitochondrial OS=Rattus norvegicus OX=10116 GN=Dmgdh PE=1 SV=1
99	516	tr|A0A0G2K9Y2|A0A0G2K9Y2_RAT	31.23	1	1	0	1	1	3		98864	Dimethylglycine dehydrogenase mitochondrial OS=Rattus norvegicus OX=10116 GN=Dmgdh PE=1 SV=1
141	11767	tr|Q64592|Q64592_RAT	31.04	3	3		2	0	2		32894	Delta3 delta2-enoyl-CoA isomerase OS=Rattus norvegicus OX=10116 PE=2 SV=1
124	1677	Q6QI44|NAA25_RAT	30.89	1	1		2	0	2		111258	N-alpha-acetyltransferase 25 NatB auxiliary subunit OS=Rattus norvegicus OX=10116 GN=Naa25 PE=2 SV=1
79	688	tr|Q8M7G5|Q8M7G5_RAT	30.76	5	5	441240	1	1	3	Oxidation (M)	24240	ATP synthase subunit a (Fragment) OS=Rattus norvegicus OX=10116 PE=2 SV=1
79	689	tr|Q549I0|Q549I0_RAT	30.76	5	5	441240	1	1	3	Oxidation (M)	25050	ATP synthase subunit a OS=Rattus norvegicus OX=10116 GN=atp6 PE=4 SV=1
79	690	P05504|ATP6_RAT	30.76	5	5	441240	1	1	3	Oxidation (M)	25076	ATP synthase subunit a OS=Rattus norvegicus OX=10116 GN=Mt-atp6 PE=1 SV=3
79	691	tr|Q8HIC7|Q8HIC7_RAT	30.76	5	5	441240	1	1	3	Oxidation (M)	25076	ATP synthase subunit a OS=Rattus norvegicus OX=10116 GN=Mt-atp6 PE=4 SV=1
79	692	tr|S5S1E9|S5S1E9_RAT	30.76	5	5	441240	1	1	3	Oxidation (M)	25049	ATP synthase subunit a OS=Rattus norvegicus OX=10116 GN=ATP6 PE=4 SV=1
79	693	tr|Q06QE5|Q06QE5_RAT	30.76	5	5	441240	1	1	3	Oxidation (M)	25075	ATP synthase subunit a OS=Rattus norvegicus OX=10116 GN=ATP6 PE=4 SV=1
79	459	tr|Q8SEZ3|Q8SEZ3_RAT	30.76	5	5	441240	1	1	3	Oxidation (M)	25030	ATP synthase subunit a OS=Rattus norvegicus OX=10116 GN=ATPase6 PE=4 SV=1
221	11891	Q64565|AGT2_RAT	30.03	2	2	102690	1	1	1		57201	Alanine--glyoxylate aminotransferase 2 mitochondrial OS=Rattus norvegicus OX=10116 GN=Agxt2 PE=1 SV=2
277	1552	O88813|ACSL5_RAT	29.94	2	2	0	1	1	1		76405	Long-chain-fatty-acid--CoA ligase 5 OS=Rattus norvegicus OX=10116 GN=Acsl5 PE=1 SV=1
103	555	tr|D4A1D3|D4A1D3_RAT	29.88	0	0	2005700	2	1	2		521487	Sacsin molecular chaperone OS=Rattus norvegicus OX=10116 GN=Sacs PE=1 SV=2
146	482	tr|D3ZHF8|D3ZHF8_RAT	29.69	2	2		2	0	2		73207	Translation factor GUF1 mitochondrial OS=Rattus norvegicus OX=10116 GN=Guf1 PE=1 SV=1
142	23226	Q6QBQ4|PLS3_RAT	29.34	3	3		2	0	2		31646	Phospholipid scramblase 3 OS=Rattus norvegicus OX=10116 GN=Plscr3 PE=2 SV=1
83	432	tr|F1LSP2|F1LSP2_RAT	28.77	1	1	88981	2	1	3		119190	Acyl-CoA dehydrogenase family member 10 OS=Rattus norvegicus OX=10116 GN=Acad10 PE=1 SV=2
278	12149	tr|A0A0G2JZF6|A0A0G2JZF6_RAT	28.14	7	7	520060	1	1	1		19554	NADH:ubiquinone oxidoreductase complex assembly factor 2 OS=Rattus norvegicus OX=10116 GN=Ndufaf2 PE=1 SV=1
279	204	tr|Q5PQZ9|Q5PQZ9_RAT	28	9	9	730870	1	1	1		14359	NADH dehydrogenase [ubiquinone] 1 subunit C2 OS=Rattus norvegicus OX=10116 GN=Ndufc2 PE=1 SV=1
92	1348	tr|D4AB75|D4AB75_RAT	27.92	2	2	585780	2	2	3	Formylation	113160	Zinc finger protein 217 OS=Rattus norvegicus OX=10116 GN=Zfp217 PE=1 SV=1
222	5796	B1WC61|ACAD9_RAT	27.74	2	2	152470	1	1	1		68843	Complex I assembly factor ACAD9 mitochondrial OS=Rattus norvegicus OX=10116 GN=Acad9 PE=1 SV=1
226	355	tr|D4AE90|D4AE90_RAT	26.79	2	2	458520	1	1	1	Formylation	50113	RCC1-like OS=Rattus norvegicus OX=10116 GN=Rcc1l PE=1 SV=1
280	28532	tr|A0A0G2JTG1|A0A0G2JTG1_RAT	26.34	16	16	86988	1	1	1		9388	10 kDa heat shock protein mitochondrial OS=Rattus norvegicus OX=10116 GN=Hspe1 PE=1 SV=1
280	28533	P26772|CH10_RAT	26.34	14	14	86988	1	1	1		10902	10 kDa heat shock protein mitochondrial OS=Rattus norvegicus OX=10116 GN=Hspe1 PE=1 SV=3
94	393	Q63563|ABCC9_RAT	26.24	1	1	1900200	2	2	3		174117	ATP-binding cassette sub-family C member 9 OS=Rattus norvegicus OX=10116 GN=Abcc9 PE=1 SV=1
84	1248	Q80ZG6|BBC3_RAT	25.76	6	6	15419000	2	2	3		20718	Bcl-2-binding component 3 OS=Rattus norvegicus OX=10116 GN=Bbc3 PE=1 SV=1
282	513	Q8K1M7|BRNP3_RAT	25.45	1	1	0	1	1	1		88497	BMP/retinoic acid-inducible neural-specific protein 3 OS=Rattus norvegicus OX=10116 GN=Brinp3 PE=2 SV=1
281	290	tr|A0A0G2JYU2|A0A0G2JYU2_RAT	25.44	4	4	772590	1	1	1		20750	Mitochondrial ribosomal protein L11 OS=Rattus norvegicus OX=10116 GN=mrpl11 PE=1 SV=1
281	291	Q5XIE3|RM11_RAT	25.44	4	4	772590	1	1	1		22420	39S ribosomal protein L11 mitochondrial OS=Rattus norvegicus OX=10116 GN=Mrpl11 PE=2 SV=1
145	1243	D4A693|AZIN2_RAT	24.4	3	3	253410	2	2	2	Formylation	49420	Antizyme inhibitor 2 OS=Rattus norvegicus OX=10116 GN=Azin2 PE=1 SV=2
227	1945	P26284|ODPA_RAT	22.73	3	3	0	1	1	1		43227	Pyruvate dehydrogenase E1 component subunit alpha somatic form mitochondrial OS=Rattus norvegicus OX=10116 GN=Pdha1 PE=1 SV=2
143	1374	tr|A0A0G2K3W1|A0A0G2K3W1_RAT	22.06	3	3	127160	1	1	2		53760	von Willebrand factor A domain-containing 8 OS=Rattus norvegicus OX=10116 GN=Vwa8 PE=1 SV=1
235	11768	Q68FU7|COQ6_RAT	21.82	2	2	21860	1	1	1		51496	Ubiquinone biosynthesis monooxygenase COQ6 mitochondrial OS=Rattus norvegicus OX=10116 GN=Coq6 PE=2 SV=1
232	1013	tr|D3ZJH9|D3ZJH9_RAT	21.59	1	1	1619200	1	1	1	Formylation	65352	Malic enzyme OS=Rattus norvegicus OX=10116 GN=Me2 PE=1 SV=1
232	1014	tr|A0A0G2K502|A0A0G2K502_RAT	21.59	1	1	1619200	1	1	1	Formylation	66310	Malic enzyme OS=Rattus norvegicus OX=10116 GN=Me2 PE=1 SV=1
229	1100	Q05961|OAS1A_RAT	21.5	3	3	0	1	1	1		41666	2'-5'-oligoadenylate synthase 1A OS=Rattus norvegicus OX=10116 GN=Oas1a PE=2 SV=1
285	398	P48037|ANXA6_RAT	21.31	1	1	757150	1	1	1		75754	Annexin A6 OS=Rattus norvegicus OX=10116 GN=Anxa6 PE=1 SV=2
285	399	tr|Q6IMZ3|Q6IMZ3_RAT	21.31	1	1	757150	1	1	1		75756	Annexin OS=Rattus norvegicus OX=10116 GN=Anxa6 PE=1 SV=1
198	5848	tr|Q5FVL8|Q5FVL8_RAT	21.22	1	1	229690	1	1	1	Formylation	77394	ATP-binding cassette subfamily B member 10 OS=Rattus norvegicus OX=10116 GN=Abcb10 PE=1 SV=1
225	351	Q8VID1|DHRS4_RAT	21.21	3	3	51708	1	1	1		29822	Dehydrogenase/reductase SDR family member 4 OS=Rattus norvegicus OX=10116 GN=Dhrs4 PE=2 SV=2
144	428	P24473|GSTK1_RAT	21.05	4	4	177260	1	1	2		25493	Glutathione S-transferase kappa 1 OS=Rattus norvegicus OX=10116 GN=Gstk1 PE=1 SV=3
144	429	tr|B6DYQ0|B6DYQ0_RAT	21.05	4	4	177260	1	1	2		25493	Glutathione S-transferase kappa OS=Rattus norvegicus OX=10116 GN=Gstk1 PE=2 SV=1
122	1214	Q5RKH7|S35F6_RAT	21.04	3	3	636580	1	1	2	Carbamidomethylation	41092	Solute carrier family 35 member F6 OS=Rattus norvegicus OX=10116 GN=Slc35f6 PE=2 SV=1
228	324	P11497|ACACA_RAT	20.95	0	0	0	1	1	1		265191	Acetyl-CoA carboxylase 1 OS=Rattus norvegicus OX=10116 GN=Acaca PE=1 SV=1
231	197	tr|M0R6J0|M0R6J0_RAT	20.87	3	3	0	1	1	1		38374	Mitochondrial ribosomal protein L39 OS=Rattus norvegicus OX=10116 GN=Mrpl39 PE=1 SV=2
286	55	tr|B0BNE6|B0BNE6_RAT	20.81	6	6	182810	1	1	1		23970	NADH dehydrogenase (Ubiquinone) Fe-S protein 8 (Predicted) isoform CRA_a OS=Rattus norvegicus OX=10116 GN=Ndufs8 PE=1 SV=1
233	6062	P15304|LIPS_RAT	20.8	1	1	261660	1	1	1		116812	Hormone-sensitive lipase OS=Rattus norvegicus OX=10116 GN=Lipe PE=1 SV=3
181	491	P46462|TERA_RAT	20.65	1	1	19615	1	1	1	Oxidation (M)		Transitional endoplasmic reticulum ATPase
