# Supplementary material for: Mitochondrial F-ATP Synthase Co-Migrating Proteins and Ca2+-Dependent Formation of Large Channels
Source: Cells. 2023 Oct 7;12(19):2414. doi: 10.3390/cells12192414 (PMC10572550; doi:10.3390/cells12192414)
Supplement: Supplementary file 1 [file cells-12-02414-s001.zip › Dataset S10.xlsx]

## Sheet: RLM KCl-BM Cont I-III(2)-IV(H)
Protein Accession Contains:
Protein Description Contains:
Protein Sample Area >=
Protein Group	Protein ID	Accession	-10lgP	Coverage (%)	Coverage (%) Sample 1	IBAQ	#Peptides	#Unique	#Spec Sample 1	PTM	Avg. Mass	Description
Protein Group	Protein ID	Accession	-10lgP	Coverage (%)	Coverage (%) Sample 1	Area Sample 1	#Peptides	#Unique	#Spec Sample 1	PTM	Avg. Mass	Description
1	2	x	300.15	61	61	53189000	35	35	68	Y	57808	Methylmalonate-semialdehyde dehydrogenase [acylating], mitochondrial OS=Rattus norvegicus OX=10116 GN=Aldh6a1 PE=1 SV=1
1	3	tr|G3V7J0|G3V7J0_RAT	300.15	61	61	53189000	35	35	68	Y	57748	Aldehyde dehydrogenase family 6, subfamily A1, isoform CRA_b OS=Rattus norvegicus OX=10116 GN=Aldh6a1 PE=1 SV=1
5	1	P32551|QCR2_RAT	280.47	53	53	14655000	20	20	32	Y	48396	Cytochrome b-c1 complex subunit 2, mitochondrial OS=Rattus norvegicus OX=10116 GN=Uqcrc2 PE=1 SV=2
2	5	tr|B2GV15|B2GV15_RAT	248.12	55	55	19824000	26	26	46	Y	53274	Dihydrolipoamide acetyltransferase component of pyruvate dehydrogenase complex OS=Rattus norvegicus OX=10116 GN=Dbt PE=1 SV=1
4	4	P67779|PHB_RAT	247.01	86	86	25218000	22	22	33	N	29820	Prohibitin OS=Rattus norvegicus OX=10116 GN=Phb PE=1 SV=1
10	14	P15999|ATPA_RAT	246	29	29	4011600	12	12	21	Y	59754	ATP synthase subunit alpha, mitochondrial OS=Rattus norvegicus OX=10116 GN=Atp5f1a PE=1 SV=2
3	9	P00507|AATM_RAT	244.24	56	56	21538000	23	23	36	Y	47314	Aspartate aminotransferase, mitochondrial OS=Rattus norvegicus OX=10116 GN=Got2 PE=1 SV=2
8	12	Q68FY0|QCR1_RAT	230.44	44	44	7338000	17	17	27	Y	52849	Cytochrome b-c1 complex subunit 1, mitochondrial OS=Rattus norvegicus OX=10116 GN=Uqcrc1 PE=1 SV=1
9	6	Q66HF1|NDUS1_RAT	230.37	35	35	8916300	17	17	27	Y	79412	NADH-ubiquinone oxidoreductase 75 kDa subunit, mitochondrial OS=Rattus norvegicus OX=10116 GN=Ndufs1 PE=1 SV=1
7	7	P10719|ATPB_RAT	224.82	59	59	6808300	16	16	29	Y	56354	ATP synthase subunit beta, mitochondrial OS=Rattus norvegicus OX=10116 GN=Atp5f1b PE=1 SV=2
7	8	tr|G3V6D3|G3V6D3_RAT	224.82	59	59	6808300	16	16	29	Y	56345	ATP synthase subunit beta OS=Rattus norvegicus OX=10116 GN=Atp5f1b PE=1 SV=1
6	10	tr|A0A0G2KB63|A0A0G2KB63_RAT	220.05	63	63	15965000	20	20	31	Y	33168	Prohibitin OS=Rattus norvegicus OX=10116 GN=Phb2 PE=1 SV=1
6	11	Q5XIH7|PHB2_RAT	220.05	63	63	15965000	20	20	31	Y	33312	Prohibitin-2 OS=Rattus norvegicus OX=10116 GN=Phb2 PE=1 SV=1
16	18	Q4FZT0|STML2_RAT	213.81	39	39	5135600	10	10	14	Y	38414	Stomatin-like protein 2, mitochondrial OS=Rattus norvegicus OX=10116 GN=Stoml2 PE=1 SV=1
14	21	Q64428|ECHA_RAT	213	18	18	1148100	9	9	14	N	82665	Trifunctional enzyme subunit alpha, mitochondrial OS=Rattus norvegicus OX=10116 GN=Hadha PE=1 SV=2
12	15	Q5BK63|NDUA9_RAT	206.52	34	34	3039700	11	11	17	Y	42559	NADH dehydrogenase [ubiquinone] 1 alpha subcomplex subunit 9, mitochondrial OS=Rattus norvegicus OX=10116 GN=Ndufa9 PE=1 SV=2
19	25	tr|D3ZG43|D3ZG43_RAT	190.92	33	33	5884400	8	8	11	N	30226	NADH dehydrogenase (Ubiquinone) Fe-S protein 3 (Predicted), isoform CRA_c OS=Rattus norvegicus OX=10116 GN=Ndufs3 PE=1 SV=1
11	13	P07756|CPSM_RAT	187.66	14	14	2159100	12	12	19	Y	164579	Carbamoyl-phosphate synthase [ammonia], mitochondrial OS=Rattus norvegicus OX=10116 GN=Cps1 PE=1 SV=1
20	29	tr|D4A0T0|D4A0T0_RAT	173.64	36	36	1052200	5	5	9	N	20859	NADH:ubiquinone oxidoreductase subunit B10 OS=Rattus norvegicus OX=10116 GN=Ndufb10 PE=1 SV=1
18	27	Q641Y2|NDUS2_RAT	166.55	19	19	4118600	7	7	12	N	52562	NADH dehydrogenase [ubiquinone] iron-sulfur protein 2, mitochondrial OS=Rattus norvegicus OX=10116 GN=Ndufs2 PE=1 SV=1
22	26	tr|F1LN92|F1LN92_RAT	158.98	12	12	1078300	6	6	8	N	89352	AFG3-like matrix AAA peptidase subunit 2 OS=Rattus norvegicus OX=10116 GN=Afg3l2 PE=1 SV=1
13	22	P19234|NDUV2_RAT	158.31	33	33	5004800	8	8	15	N	27378	NADH dehydrogenase [ubiquinone] flavoprotein 2, mitochondrial OS=Rattus norvegicus OX=10116 GN=Ndufv2 PE=1 SV=2
15	23	tr|Q5XIH3|Q5XIH3_RAT	151.87	19	19	2008100	7	7	14	N	50731	NADH dehydrogenase [ubiquinone] flavoprotein 1, mitochondrial OS=Rattus norvegicus OX=10116 GN=Ndufv1 PE=1 SV=1
24	42	tr|D4A565|D4A565_RAT	151.66	24	24	969090	5	5	8	N	21664	NADH dehydrogenase (Ubiquinone) 1 beta subcomplex, 5 (Predicted), isoform CRA_b OS=Rattus norvegicus OX=10116 GN=Ndufb5 PE=1 SV=1
23	31	tr|B2RYS8|B2RYS8_RAT	147.4	24	24	1923800	3	3	8	N	21959	NADH dehydrogenase [ubiquinone] 1 beta subcomplex subunit 8, mitochondrial OS=Rattus norvegicus OX=10116 GN=Ndufb8 PE=1 SV=1
21	28	tr|D3ZFQ8|D3ZFQ8_RAT	146.08	22	22	5324200	6	6	8	Y	35435	Cytochrome c-1 OS=Rattus norvegicus OX=10116 GN=Cyc1 PE=1 SV=3
17	19	P22791|HMCS2_RAT	140.46	22	22	3592200	9	9	13	Y	56912	Hydroxymethylglutaryl-CoA synthase, mitochondrial OS=Rattus norvegicus OX=10116 GN=Hmgcs2 PE=1 SV=1
17	20	tr|Q68G44|Q68G44_RAT	140.46	22	22	3592200	9	9	13	Y	56886	3-hydroxy-3-methylglutaryl coenzyme A synthase OS=Rattus norvegicus OX=10116 GN=Hmgcs2 PE=1 SV=1
30	32	tr|Q6P6W6|Q6P6W6_RAT	126.85	26	26	755760	3	3	5	N	31701	NADH dehydrogenase [ubiquinone] 1 alpha subcomplex subunit 10, mitochondrial OS=Rattus norvegicus OX=10116 GN=Ndufa10 PE=2 SV=1
30	33	Q561S0|NDUAA_RAT	126.85	20	20	755760	3	3	5	N	40493	NADH dehydrogenase [ubiquinone] 1 alpha subcomplex subunit 10, mitochondrial OS=Rattus norvegicus OX=10116 GN=Ndufa10 PE=1 SV=1
32	35	P13086|SUCA_RAT	124.18	11	11	766110	3	3	4	N	36148	Succinate--CoA ligase [ADP/GDP-forming] subunit alpha, mitochondrial OS=Rattus norvegicus OX=10116 GN=Suclg1 PE=2 SV=2
32	36	tr|A0A0H2UHE1|A0A0H2UHE1_RAT	124.18	10	10	766110	3	3	4	N	37560	Succinate--CoA ligase [ADP/GDP-forming] subunit alpha, mitochondrial OS=Rattus norvegicus OX=10116 GN=Suclg1 PE=1 SV=1
25	30	Q7TQ16|QCR8_RAT	117.67	49	49	861460	5	5	7	N	9849	Cytochrome b-c1 complex subunit 8 OS=Rattus norvegicus OX=10116 GN=Uqcrq PE=3 SV=1
31	39	P17764|THIL_RAT	110.34	12	12	652570	3	3	5	N	44695	Acetyl-CoA acetyltransferase, mitochondrial OS=Rattus norvegicus OX=10116 GN=Acat1 PE=1 SV=1
28	40	Q60587|ECHB_RAT	99.26	8	8	323320	3	3	5	N	51414	Trifunctional enzyme subunit beta, mitochondrial OS=Rattus norvegicus OX=10116 GN=Hadhb PE=1 SV=1
42	47	Q9WVK3|PECR_RAT	88.59	10	10	498870	2	2	3	N	32433	Peroxisomal trans-2-enoyl-CoA reductase OS=Rattus norvegicus OX=10116 GN=Pecr PE=2 SV=1
42	48	tr|A0A0G2JVG4|A0A0G2JVG4_RAT	88.59	10	10	498870	2	2	3	N	32737	Peroxisomal trans-2-enoyl-CoA reductase OS=Rattus norvegicus OX=10116 GN=Pecr PE=1 SV=1
41	46	tr|F1LXA0|F1LXA0_RAT	84.32	17	17	638530	2	2	3	N	17178	NADH dehydrogenase [ubiquinone] 1 alpha subcomplex subunit 12 OS=Rattus norvegicus OX=10116 GN=Ndufa12 PE=1 SV=2
27	37	P20788|UCRI_RAT	83.1	16	16	1041900	3	3	6	N	29446	Cytochrome b-c1 complex subunit Rieske, mitochondrial OS=Rattus norvegicus OX=10116 GN=Uqcrfs1 PE=1 SV=2
97	92	tr|Q4G067|Q4G067_RAT	80.06	6	6	206200	1	1	1	N	37440	Mitochondrial ribosomal protein L44 OS=Rattus norvegicus OX=10116 GN=Mrpl44 PE=1 SV=1
26	34	tr|Q5RJN0|Q5RJN0_RAT	79.79	27	27	731870	4	4	6	Y	23945	NADH dehydrogenase (Ubiquinone) Fe-S protein 7 OS=Rattus norvegicus OX=10116 GN=Ndufs7 PE=1 SV=1
98	93	tr|A0A0G2K8Q8|A0A0G2K8Q8_RAT	74.65	27	27	359800	1	1	1	N	7099	Ubiquinol-cytochrome c reductase, complex III subunit X OS=Rattus norvegicus OX=10116 GN=Uqcr10 PE=1 SV=1
98	94	tr|B2RYX1|B2RYX1_RAT	74.65	27	27	359800	1	1	1	N	7462	LOC685322 protein OS=Rattus norvegicus OX=10116 GN=Uqcr10 PE=2 SV=1
99	95	Q63362|NDUA5_RAT	72.33	22	22	0	1	1	1	N	13412	NADH dehydrogenase [ubiquinone] 1 alpha subcomplex subunit 5 OS=Rattus norvegicus OX=10116 GN=Ndufa5 PE=1 SV=3
38	43	tr|A0A0G2JSH5|A0A0G2JSH5_RAT	70.23	6	6	386050	3	1	3	Y	68759	Serum albumin OS=Rattus norvegicus OX=10116 GN=Alb PE=1 SV=1
47	86	tr|F1LPG5|F1LPG5_RAT	69.49	19	19	1195600	1	1	2	N	15064	NADH:ubiquinone oxidoreductase subunit B4 OS=Rattus norvegicus OX=10116 GN=Ndufb4 PE=1 SV=1
33	41	P19511|AT5F1_RAT	69.1	26	26	957100	3	3	4	N	28869	ATP synthase F(0) complex subunit B1, mitochondrial OS=Rattus norvegicus OX=10116 GN=Atp5pb PE=1 SV=1
43	51	P10888|COX41_RAT	69	14	14	904460	2	2	3	N	19515	Cytochrome c oxidase subunit 4 isoform 1, mitochondrial OS=Rattus norvegicus OX=10116 GN=Cox4i1 PE=1 SV=1
100	96	P08461|ODP2_RAT	68.17	2	2	185680	1	1	1	N	67166	Dihydrolipoyllysine-residue acetyltransferase component of pyruvate dehydrogenase complex, mitochondrial OS=Rattus norvegicus OX=10116 GN=Dlat PE=1 SV=3
101	97	tr|Q5PQZ9|Q5PQZ9_RAT	67.4	11	11	567510	1	1	1	N	14359	NADH dehydrogenase [ubiquinone] 1 subunit C2 OS=Rattus norvegicus OX=10116 GN=Ndufc2 PE=1 SV=1
57	98	P29147|BDH_RAT	64.79	6	6	671700	1	1	2	N	38202	D-beta-hydroxybutyrate dehydrogenase, mitochondrial OS=Rattus norvegicus OX=10116 GN=Bdh1 PE=1 SV=2
57	99	tr|A0A0G2JSH2|A0A0G2JSH2_RAT	64.79	6	6	671700	1	1	2	N	38333	3-hydroxybutyrate dehydrogenase, type 1, isoform CRA_a OS=Rattus norvegicus OX=10116 GN=Bdh1 PE=1 SV=1
29	49	tr|B2RYW3|B2RYW3_RAT	64.36	16	16	490610	2	2	5	N	21892	NADH dehydrogenase (Ubiquinone) 1 beta subcomplex, 9 OS=Rattus norvegicus OX=10116 GN=Ndufb9 PE=1 SV=1
58	100	tr|D3ZS58|D3ZS58_RAT	63.23	14	14	65872	1	1	2	N	10845	NADH dehydrogenase [ubiquinone] 1 alpha subcomplex subunit 2 OS=Rattus norvegicus OX=10116 GN=Ndufa2 PE=1 SV=1
34	38	tr|D4A3V2|D4A3V2_RAT	62.49	21	21	410840	3	3	4	N	15224	NADH dehydrogenase [ubiquinone] 1 alpha subcomplex subunit 6 OS=Rattus norvegicus OX=10116 GN=Ndufa6 PE=1 SV=1
39	44	P02770|ALBU_RAT	56.42	5	5	533210	3	1	3	Y	68731	Serum albumin OS=Rattus norvegicus OX=10116 GN=Alb PE=1 SV=2
46	76	tr|A7XYD5|A7XYD5_RAT	55.8	2	2	293410	1	1	2	N	68856	NADH-ubiquinone oxidoreductase chain 5 OS=Rattus norvegicus OX=10116 GN=Nd5 PE=3 SV=1
46	77	tr|Q06QK5|Q06QK5_RAT	55.8	2	2	293410	1	1	2	N	68606	NADH-ubiquinone oxidoreductase chain 5 OS=Rattus norvegicus OX=10116 GN=ND5 PE=3 SV=1
46	78	tr|Q8SEZ0|Q8SEZ0_RAT	55.8	2	2	293410	1	1	2	N	68618	NADH-ubiquinone oxidoreductase chain 5 OS=Rattus norvegicus OX=10116 GN=Mt-nd5 PE=3 SV=1
46	79	tr|A0A096XKT9|A0A096XKT9_RAT	55.8	2	2	293410	1	1	2	N	68584	NADH-ubiquinone oxidoreductase chain 5 OS=Rattus norvegicus OX=10116 GN=ND5 PE=3 SV=1
46	80	tr|A7XYC1|A7XYC1_RAT	55.8	2	2	293410	1	1	2	N	68841	NADH-ubiquinone oxidoreductase chain 5 OS=Rattus norvegicus OX=10116 GN=Nd5 PE=3 SV=1
46	81	P11661|NU5M_RAT	55.8	2	2	293410	1	1	2	N	68618	NADH-ubiquinone oxidoreductase chain 5 OS=Rattus norvegicus OX=10116 GN=Mtnd5 PE=3 SV=3
46	82	tr|Q06QG6|Q06QG6_RAT	55.8	2	2	293410	1	1	2	N	68588	NADH-ubiquinone oxidoreductase chain 5 OS=Rattus norvegicus OX=10116 GN=ND5 PE=3 SV=1
46	83	tr|Q06QA1|Q06QA1_RAT	55.8	2	2	293410	1	1	2	N	68574	NADH-ubiquinone oxidoreductase chain 5 OS=Rattus norvegicus OX=10116 GN=ND5 PE=3 SV=1
46	84	tr|A0A0A1FZN8|A0A0A1FZN8_RAT	55.8	2	2	293410	1	1	2	N	68970	NADH-ubiquinone oxidoreductase chain 5 OS=Rattus norvegicus OX=10116 GN=ND5 PE=3 SV=1
102	101	tr|B2RYT5|B2RYT5_RAT	55.47	11	11	648880	1	1	1	N	12651	Cox7a2l protein OS=Rattus norvegicus OX=10116 GN=Cox7a2l PE=2 SV=1
102	102	tr|D3ZYX8|D3ZYX8_RAT	55.47	10	10	648880	1	1	1	N	13274	Cytochrome c oxidase subunit 7A2-like OS=Rattus norvegicus OX=10116 GN=Cox7a2l PE=1 SV=1
40	52	tr|B0BNE6|B0BNE6_RAT	51.74	9	9	369880	2	2	3	N	23970	NADH dehydrogenase (Ubiquinone) Fe-S protein 8 (Predicted), isoform CRA_a OS=Rattus norvegicus OX=10116 GN=Ndufs8 PE=1 SV=1
59	103	Q80W89|NDUAB_RAT	47.9	11	11	134820	1	1	2	N	14854	NADH dehydrogenase [ubiquinone] 1 alpha subcomplex subunit 11 OS=Rattus norvegicus OX=10116 GN=Ndufa11 PE=2 SV=1
50	55	tr|D3ZZ21|D3ZZ21_RAT	45.71	26	26	777740	2	2	2	Y	15638	NADH dehydrogenase (Ubiquinone) 1 beta subcomplex, 6 (Predicted) OS=Rattus norvegicus OX=10116 GN=Ndufb6 PE=1 SV=1
75	89	tr|Q5UAJ8|Q5UAJ8_RAT	45.55	3	3	0	1	1	1	Y	38455	NADH-ubiquinone oxidoreductase chain 2 OS=Rattus norvegicus OX=10116 GN=ND2 PE=3 SV=1
75	90	tr|Q06Q97|Q06Q97_RAT	45.55	3	3	0	1	1	1	Y	38485	NADH-ubiquinone oxidoreductase chain 2 OS=Rattus norvegicus OX=10116 GN=ND2 PE=3 SV=1
75	91	tr|A0A0A1G491|A0A0A1G491_RAT	45.55	3	3	0	1	1	1	Y	38542	NADH-ubiquinone oxidoreductase chain 2 OS=Rattus norvegicus OX=10116 GN=ND2 PE=3 SV=1
49	53	P52873|PYC_RAT	45.14	3	3	0	2	2	2	N	129777	Pyruvate carboxylase, mitochondrial OS=Rattus norvegicus OX=10116 GN=Pc PE=1 SV=2
49	54	tr|A0A0G2JTL5|A0A0G2JTL5_RAT	45.14	3	3	0	2	2	2	N	140005	Pyruvate carboxylase, mitochondrial OS=Rattus norvegicus OX=10116 GN=Pc PE=1 SV=1
55	63	tr|D4A7L4|D4A7L4_RAT	41.16	21	21	490190	2	2	2	Y	17634	NADH dehydrogenase (Ubiquinone) 1 beta subcomplex, 11 (Predicted) OS=Rattus norvegicus OX=10116 GN=Ndufb11 PE=1 SV=1
73	85	tr|A0A0G2JVH4|A0A0G2JVH4_RAT	39.7	1	1	32045	1	1	1	N	86230	MICOS complex subunit MIC60 OS=Rattus norvegicus OX=10116 GN=Immt PE=1 SV=1
73	104	tr|A0A140TAG5|A0A140TAG5_RAT	39.7	2	2	32045	1	1	1	N	67049	MICOS complex subunit MIC60 OS=Rattus norvegicus OX=10116 GN=Immt PE=1 SV=1
73	105	Q3KR86|MIC60_RAT	39.7	2	2	32045	1	1	1	N	67177	MICOS complex subunit Mic60 (Fragment) OS=Rattus norvegicus OX=10116 GN=Immt PE=1 SV=1
103	106	tr|G3V6I4|G3V6I4_RAT	39.2	9	9	81929	1	1	1	N	37791	Mitochondrial amidoxime reducing component 1 OS=Rattus norvegicus OX=10116 GN=Marc1 PE=1 SV=1
44	56	tr|S5RZM8|S5RZM8_RAT	38	7	7	515070	2	2	3	Y	25958	Cytochrome c oxidase subunit 2 OS=Rattus norvegicus OX=10116 GN=COX2 PE=3 SV=1
44	57	P00406|COX2_RAT	38	7	7	515070	2	2	3	Y	25928	Cytochrome c oxidase subunit 2 OS=Rattus norvegicus OX=10116 GN=Mtco2 PE=1 SV=3
44	58	tr|Q37652|Q37652_RAT	38	7	7	515070	2	2	3	Y	26007	Cytochrome c oxidase subunit 2 OS=Rattus norvegicus OX=10116 GN=COXII PE=3 SV=1
44	59	tr|Q5UAJ6|Q5UAJ6_RAT	38	7	7	515070	2	2	3	Y	25942	Cytochrome c oxidase subunit 2 OS=Rattus norvegicus OX=10116 GN=COX2 PE=3 SV=1
44	60	tr|Q8SEZ5|Q8SEZ5_RAT	38	7	7	515070	2	2	3	Y	25928	Cytochrome c oxidase subunit 2 OS=Rattus norvegicus OX=10116 GN=Mt-co2 PE=1 SV=1
44	61	tr|A0A097PE04|A0A097PE04_RAT	38	7	7	515070	2	2	3	Y	25894	Cytochrome c oxidase subunit 2 OS=Rattus norvegicus OX=10116 GN=COX2 PE=3 SV=1
104	107	tr|G3V6P2|G3V6P2_RAT	37.62	3	3	77137	1	1	1	N	48899	Dihydrolipoamide S-succinyltransferase (E2 component of 2-oxo-glutarate complex), isoform CRA_a OS=Rattus norvegicus OX=10116 GN=Dlst PE=1 SV=1
72	65	Q06437|ODPAT_RAT	35.87	3	3	988510	1	1	1	N	43393	Pyruvate dehydrogenase E1 component subunit alpha, testis-specific form, mitochondrial OS=Rattus norvegicus OX=10116 GN=Pdha2 PE=1 SV=1
56	66	P05508|NU4M_RAT	35.57	6	6	139630	2	2	2	N	51783	NADH-ubiquinone oxidoreductase chain 4 OS=Rattus norvegicus OX=10116 GN=Mtnd4 PE=3 SV=3
56	67	tr|Q06QA2|Q06QA2_RAT	35.57	6	6	139630	2	2	2	N	51787	NADH-ubiquinone oxidoreductase chain 4 OS=Rattus norvegicus OX=10116 GN=ND4 PE=3 SV=1
56	68	tr|Q7HKW3|Q7HKW3_RAT	35.57	6	6	139630	2	2	2	N	51801	NADH-ubiquinone oxidoreductase chain 4 (Fragment) OS=Rattus norvegicus OX=10116 GN=NADH4 PE=3 SV=1
56	69	tr|Q06QG7|Q06QG7_RAT	35.57	6	6	139630	2	2	2	N	51791	NADH-ubiquinone oxidoreductase chain 4 OS=Rattus norvegicus OX=10116 GN=ND4 PE=3 SV=1
56	70	tr|D2E6K0|D2E6K0_RAT	35.57	6	6	139630	2	2	2	N	51833	NADH-ubiquinone oxidoreductase chain 4 OS=Rattus norvegicus OX=10116 GN=ND4 PE=3 SV=1
56	71	tr|Q06Q89|Q06Q89_RAT	35.57	6	6	139630	2	2	2	N	51819	NADH-ubiquinone oxidoreductase chain 4 OS=Rattus norvegicus OX=10116 GN=ND4 PE=3 SV=1
56	72	tr|Q35737|Q35737_RAT	35.57	6	6	139630	2	2	2	N	51765	NADH-ubiquinone oxidoreductase chain 4 OS=Rattus norvegicus OX=10116 PE=3 SV=1
56	73	tr|A7XYB9|A7XYB9_RAT	35.57	6	6	139630	2	2	2	N	51773	NADH-ubiquinone oxidoreductase chain 4 OS=Rattus norvegicus OX=10116 GN=Nd4 PE=3 SV=1
56	74	tr|Q8HIC6|Q8HIC6_RAT	35.57	6	6	139630	2	2	2	N	51783	NADH-ubiquinone oxidoreductase chain 4 OS=Rattus norvegicus OX=10116 GN=Mt-nd4 PE=3 SV=1
56	75	tr|Q06QE1|Q06QE1_RAT	35.57	6	6	139630	2	2	2	N	51851	NADH-ubiquinone oxidoreductase chain 4 OS=Rattus norvegicus OX=10116 GN=ND4 PE=3 SV=1
60	109	P11240|COX5A_RAT	35.01	21	21	0	1	1	2	N	16130	Cytochrome c oxidase subunit 5A, mitochondrial OS=Rattus norvegicus OX=10116 GN=Cox5a PE=1 SV=1
61	110	Q9WVK7|HCDH_RAT	34.57	4	4	44969	1	1	2	N	34448	Hydroxyacyl-coenzyme A dehydrogenase, mitochondrial OS=Rattus norvegicus OX=10116 GN=Hadh PE=2 SV=1
105	111	Q5XJW2|G45IP_RAT	34.39	4	4	89396	1	1	1	N	26467	Growth arrest and DNA damage-inducible proteins-interacting protein 1 OS=Rattus norvegicus OX=10116 GN=Gadd45gip1 PE=2 SV=2
76	108	O70595|ABCB6_RAT	33.13	1	1	300700	1	1	1	Y	93305	ATP-binding cassette sub-family B member 6, mitochondrial OS=Rattus norvegicus OX=10116 GN=Abcb6 PE=2 SV=1
106	113	tr|D3ZCZ9|D3ZCZ9_RAT	32.42	21	21	0	1	1	1	N	13040	NADH dehydrogenase [ubiquinone] iron-sulfur protein 6, mitochondrial OS=Rattus norvegicus OX=10116 GN=LOC100912599 PE=1 SV=1
67	64	tr|D3ZJY1|D3ZJY1_RAT	31.55	9	9	10862	1	1	1	N	30237	Mitochondrial ribosomal protein L28 OS=Rattus norvegicus OX=10116 GN=Mrpl28 PE=1 SV=1
45	116	P35435|ATPG_RAT	29.96	12	12	276970	1	1	3	N	30191	ATP synthase subunit gamma, mitochondrial OS=Rattus norvegicus OX=10116 GN=Atp5f1c PE=1 SV=2
45	117	tr|Q6QI09|Q6QI09_RAT	29.96	5	5	276970	1	1	3	N	67721	ATP synthase subunit gamma, mitochondrial OS=Rattus norvegicus OX=10116 GN=Taf3 PE=1 SV=1
108	121	tr|F1M9H4|F1M9H4_RAT	27.16	0	0	309460	1	1	1	N	225602	HIVEP zinc finger 1 OS=Rattus norvegicus OX=10116 GN=Hivep1 PE=1 SV=2
74	88	Q64578|AT2A1_RAT	25.35	1	1	174900	1	1	1	Y	109409	Sarcoplasmic/endoplasmic reticulum calcium ATPase 1 OS=Rattus norvegicus OX=10116 GN=Atp2a1 PE=1 SV=1
116	140	tr|F1LPI6|F1LPI6_RAT	25.24	0	0	0	1	1	1	N	200075	Peripheral-type benzodiazepine receptor-associated protein 1 OS=Rattus norvegicus OX=10116 GN=Tspoap1 PE=4 SV=1
116	141	Q9JIR0|RIMB1_RAT	25.24	0	0	0	1	1	1	N	200202	Peripheral-type benzodiazepine receptor-associated protein 1 OS=Rattus norvegicus OX=10116 GN=Tspoap1 PE=1 SV=2
110	128	Q6AXW1|GLRX2_RAT	24.59	8	8	261060	1	1	1	Y	17275	Glutaredoxin-2, mitochondrial OS=Rattus norvegicus OX=10116 GN=Glrx2 PE=2 SV=2
86	169	tr|Q68FQ5|Q68FQ5_RAT	22.95	1	1	0	1	1	1	N	81255	Mitochondrial translational initiation factor 2 OS=Rattus norvegicus OX=10116 GN=Mtif2 PE=2 SV=1
86	170	tr|F7FDM3|F7FDM3_RAT	22.95	1	1	0	1	1	1	N	81470	Mitochondrial translational initiation factor 2 OS=Rattus norvegicus OX=10116 GN=Mtif2 PE=1 SV=2
66	167	tr|D4A054|D4A054_RAT	21.33	0	0	150670	1	1	1	N	341403	RAN-binding protein 2 OS=Rattus norvegicus OX=10116 GN=Ranbp2 PE=1 SV=2
66	168	tr|M0R3M4|M0R3M4_RAT	21.33	0	0	150670	1	1	1	N	344396	RAN-binding protein 2 OS=Rattus norvegicus OX=10116 GN=Ranbp2 PE=1 SV=1
80	136	tr|Q5U2X8|Q5U2X8_RAT	20.96	2	2	788320	1	1	1	N	50444	Acyl-CoA thioesterase 9 OS=Rattus norvegicus OX=10116 GN=Acot9 PE=1 SV=1
total 116 proteins

## Sheet: RLM KCl-BM Cont I-III(2)-IV(L)
Protein Group	Protein ID	Accession	-10lgP	Coverage (%)	Coverage (%) Sample 2	IBAQ	#Peptides	#Unique	#Spec Sample 2	PTM	Avg. Mass	Description
2	12	Q68FY0|QCR1_RAT	348.07	64	64	52406000	33	33	66	Y	52849	Cytochrome b-c1 complex subunit 1, mitochondrial OS=Rattus norvegicus OX=10116 GN=Uqcrc1 PE=1 SV=1
3	1	P32551|QCR2_RAT	341.51	80	80	110240000	35	35	64	Y	48396	Cytochrome b-c1 complex subunit 2, mitochondrial OS=Rattus norvegicus OX=10116 GN=Uqcrc2 PE=1 SV=2
5	6	Q66HF1|NDUS1_RAT	327.69	61	61	55992000	37	37	58	Y	79412	NADH-ubiquinone oxidoreductase 75 kDa subunit, mitochondrial OS=Rattus norvegicus OX=10116 GN=Ndufs1 PE=1 SV=1
6	14	P15999|ATPA_RAT	320.78	46	46	27436000	28	28	51	Y	59754	ATP synthase subunit alpha, mitochondrial OS=Rattus norvegicus OX=10116 GN=Atp5f1a PE=1 SV=2
10	9	P00507|AATM_RAT	304.68	49	49	43236000	22	22	37	Y	47314	Aspartate aminotransferase, mitochondrial OS=Rattus norvegicus OX=10116 GN=Got2 PE=1 SV=2
1	7	P10719|ATPB_RAT	303.01	79	79	36456000	28	28	68	Y	56354	ATP synthase subunit beta, mitochondrial OS=Rattus norvegicus OX=10116 GN=Atp5f1b PE=1 SV=2
1	8	tr|G3V6D3|G3V6D3_RAT	303.01	79	79	36456000	28	28	68	Y	56345	ATP synthase subunit beta OS=Rattus norvegicus OX=10116 GN=Atp5f1b PE=1 SV=1
4	2	Q02253|MMSA_RAT	300.11	59	59	68020000	30	30	59	Y	57808	Methylmalonate-semialdehyde dehydrogenase [acylating], mitochondrial OS=Rattus norvegicus OX=10116 GN=Aldh6a1 PE=1 SV=1
4	3	tr|G3V7J0|G3V7J0_RAT	300.11	59	59	68020000	30	30	59	Y	57748	Aldehyde dehydrogenase family 6, subfamily A1, isoform CRA_b OS=Rattus norvegicus OX=10116 GN=Aldh6a1 PE=1 SV=1
11	33	Q561S0|NDUAA_RAT	285.35	60	60	11323000	20	20	35	Y	40493	NADH dehydrogenase [ubiquinone] 1 alpha subcomplex subunit 10, mitochondrial OS=Rattus norvegicus OX=10116 GN=Ndufa10 PE=1 SV=1
13	27	Q641Y2|NDUS2_RAT	283.74	39	39	22143000	16	16	29	Y	52562	NADH dehydrogenase [ubiquinone] iron-sulfur protein 2, mitochondrial OS=Rattus norvegicus OX=10116 GN=Ndufs2 PE=1 SV=1
7	15	Q5BK63|NDUA9_RAT	279.21	71	71	28429000	29	29	47	Y	42559	NADH dehydrogenase [ubiquinone] 1 alpha subcomplex subunit 9, mitochondrial OS=Rattus norvegicus OX=10116 GN=Ndufa9 PE=1 SV=2
9	4	P67779|PHB_RAT	275.87	86	86	30873000	23	23	37	N	29820	Prohibitin OS=Rattus norvegicus OX=10116 GN=Phb PE=1 SV=1
8	23	tr|Q5XIH3|Q5XIH3_RAT	261.44	44	44	21231000	20	20	38	Y	50731	NADH dehydrogenase [ubiquinone] flavoprotein 1, mitochondrial OS=Rattus norvegicus OX=10116 GN=Ndufv1 PE=1 SV=1
12	25	tr|D3ZG43|D3ZG43_RAT	257.54	56	56	40764000	20	20	31	N	30226	NADH dehydrogenase (Ubiquinone) Fe-S protein 3 (Predicted), isoform CRA_c OS=Rattus norvegicus OX=10116 GN=Ndufs3 PE=1 SV=1
18	29	tr|D4A0T0|D4A0T0_RAT	238.03	55	55	8099900	9	9	20	Y	20859	NADH:ubiquinone oxidoreductase subunit B10 OS=Rattus norvegicus OX=10116 GN=Ndufb10 PE=1 SV=1
14	11	Q5XIH7|PHB2_RAT	236.25	61	61	26326000	20	20	27	Y	33312	Prohibitin-2 OS=Rattus norvegicus OX=10116 GN=Phb2 PE=1 SV=1
23	42	tr|D4A565|D4A565_RAT	231.84	33	33	9080800	8	8	14	N	21664	NADH dehydrogenase (Ubiquinone) 1 beta subcomplex, 5 (Predicted), isoform CRA_b OS=Rattus norvegicus OX=10116 GN=Ndufb5 PE=1 SV=1
15	13	P07756|CPSM_RAT	229.44	11	11	4242100	11	11	27	N	164579	Carbamoyl-phosphate synthase [ammonia], mitochondrial OS=Rattus norvegicus OX=10116 GN=Cps1 PE=1 SV=1
22	21	Q64428|ECHA_RAT	225.73	18	18	3929700	10	10	14	N	82665	Trifunctional enzyme subunit alpha, mitochondrial OS=Rattus norvegicus OX=10116 GN=Hadha PE=1 SV=2
19	28	tr|D3ZFQ8|D3ZFQ8_RAT	223.25	52	52	27068000	13	13	19	Y	35435	Cytochrome c-1 OS=Rattus norvegicus OX=10116 GN=Cyc1 PE=1 SV=3
33	95	Q63362|NDUA5_RAT	207.47	46	46	467140	6	6	8	N	13412	NADH dehydrogenase [ubiquinone] 1 alpha subcomplex subunit 5 OS=Rattus norvegicus OX=10116 GN=Ndufa5 PE=1 SV=3
17	49	tr|B2RYW3|B2RYW3_RAT	203	53	53	11627000	12	12	22	Y	21892	NADH dehydrogenase (Ubiquinone) 1 beta subcomplex, 9 OS=Rattus norvegicus OX=10116 GN=Ndufb9 PE=1 SV=1
20	34	tr|Q5RJN0|Q5RJN0_RAT	193.53	31	31	9952800	11	11	16	Y	23945	NADH dehydrogenase (Ubiquinone) Fe-S protein 7 OS=Rattus norvegicus OX=10116 GN=Ndufs7 PE=1 SV=1
26	31	tr|B2RYS8|B2RYS8_RAT	187.58	40	40	13460000	6	6	12	Y	21959	NADH dehydrogenase [ubiquinone] 1 beta subcomplex subunit 8, mitochondrial OS=Rattus norvegicus OX=10116 GN=Ndufb8 PE=1 SV=1
24	37	P20788|UCRI_RAT	186.52	36	36	12306000	11	11	13	N	29446	Cytochrome b-c1 complex subunit Rieske, mitochondrial OS=Rattus norvegicus OX=10116 GN=Uqcrfs1 PE=1 SV=2
16	22	P19234|NDUV2_RAT	181.43	43	43	25341000	13	13	23	Y	27378	NADH dehydrogenase [ubiquinone] flavoprotein 2, mitochondrial OS=Rattus norvegicus OX=10116 GN=Ndufv2 PE=1 SV=2
21	19	P22791|HMCS2_RAT	181.15	21	21	6116700	9	9	15	Y	56912	Hydroxymethylglutaryl-CoA synthase, mitochondrial OS=Rattus norvegicus OX=10116 GN=Hmgcs2 PE=1 SV=1
21	20	tr|Q68G44|Q68G44_RAT	181.15	21	21	6116700	9	9	15	Y	56886	3-hydroxy-3-methylglutaryl coenzyme A synthase OS=Rattus norvegicus OX=10116 GN=Hmgcs2 PE=1 SV=1
25	52	tr|B0BNE6|B0BNE6_RAT	167.4	40	40	6960400	10	10	12	Y	23970	NADH dehydrogenase (Ubiquinone) Fe-S protein 8 (Predicted), isoform CRA_a OS=Rattus norvegicus OX=10116 GN=Ndufs8 PE=1 SV=1
31	113	tr|D3ZCZ9|D3ZCZ9_RAT	161.8	46	46	2062400	4	4	9	Y	13040	NADH dehydrogenase [ubiquinone] iron-sulfur protein 6, mitochondrial OS=Rattus norvegicus OX=10116 GN=LOC100912599 PE=1 SV=1
27	39	P17764|THIL_RAT	151.22	16	16	1063400	4	4	11	N	44695	Acetyl-CoA acetyltransferase, mitochondrial OS=Rattus norvegicus OX=10116 GN=Acat1 PE=1 SV=1
32	30	Q7TQ16|QCR8_RAT	147.19	50	50	4341900	6	6	9	N	9849	Cytochrome b-c1 complex subunit 8 OS=Rattus norvegicus OX=10116 GN=Uqcrq PE=3 SV=1
29	46	tr|F1LXA0|F1LXA0_RAT	145.12	42	42	10398000	7	7	10	N	17178	NADH dehydrogenase [ubiquinone] 1 alpha subcomplex subunit 12 OS=Rattus norvegicus OX=10116 GN=Ndufa12 PE=1 SV=2
39	35	P13086|SUCA_RAT	143.48	12	12	1500300	4	4	6	N	36148	Succinate--CoA ligase [ADP/GDP-forming] subunit alpha, mitochondrial OS=Rattus norvegicus OX=10116 GN=Suclg1 PE=2 SV=2
39	36	tr|A0A0H2UHE1|A0A0H2UHE1_RAT	143.48	12	12	1500300	4	4	6	N	37560	Succinate--CoA ligase [ADP/GDP-forming] subunit alpha, mitochondrial OS=Rattus norvegicus OX=10116 GN=Suclg1 PE=1 SV=1
38	116	P35435|ATPG_RAT	138.08	28	28	1479200	5	5	6	N	30191	ATP synthase subunit gamma, mitochondrial OS=Rattus norvegicus OX=10116 GN=Atp5f1c PE=1 SV=2
47	77	tr|Q06QK5|Q06QK5_RAT	127.78	8	8	4045400	4	4	4	Y	68606	NADH-ubiquinone oxidoreductase chain 5 OS=Rattus norvegicus OX=10116 GN=ND5 PE=3 SV=1
47	78	tr|Q8SEZ0|Q8SEZ0_RAT	127.78	8	8	4045400	4	4	4	Y	68618	NADH-ubiquinone oxidoreductase chain 5 OS=Rattus norvegicus OX=10116 GN=Mt-nd5 PE=3 SV=1
47	79	tr|A0A096XKT9|A0A096XKT9_RAT	127.78	8	8	4045400	4	4	4	Y	68584	NADH-ubiquinone oxidoreductase chain 5 OS=Rattus norvegicus OX=10116 GN=ND5 PE=3 SV=1
47	81	P11661|NU5M_RAT	127.78	8	8	4045400	4	4	4	Y	68618	NADH-ubiquinone oxidoreductase chain 5 OS=Rattus norvegicus OX=10116 GN=Mtnd5 PE=3 SV=3
47	82	tr|Q06QG6|Q06QG6_RAT	127.78	8	8	4045400	4	4	4	Y	68588	NADH-ubiquinone oxidoreductase chain 5 OS=Rattus norvegicus OX=10116 GN=ND5 PE=3 SV=1
47	83	tr|Q06QA1|Q06QA1_RAT	127.78	8	8	4045400	4	4	4	Y	68574	NADH-ubiquinone oxidoreductase chain 5 OS=Rattus norvegicus OX=10116 GN=ND5 PE=3 SV=1
42	86	tr|F1LPG5|F1LPG5_RAT	127.78	34	34	2771400	3	3	5	N	15064	NADH:ubiquinone oxidoreductase subunit B4 OS=Rattus norvegicus OX=10116 GN=Ndufb4 PE=1 SV=1
28	2162	tr|A9UMV9|A9UMV9_RAT	127.36	54	54	2745200	5	5	10	Y	12500	NADH:ubiquinone oxidoreductase subunit A7 OS=Rattus norvegicus OX=10116 GN=Ndufa7 PE=1 SV=1
36	97	tr|Q5PQZ9|Q5PQZ9_RAT	124.87	27	27	4741200	5	5	7	N	14359	NADH dehydrogenase [ubiquinone] 1 subunit C2 OS=Rattus norvegicus OX=10116 GN=Ndufc2 PE=1 SV=1
57	47	Q9WVK3|PECR_RAT	119.59	15	15	73229	3	3	3	N	32433	Peroxisomal trans-2-enoyl-CoA reductase OS=Rattus norvegicus OX=10116 GN=Pecr PE=2 SV=1
57	48	tr|A0A0G2JVG4|A0A0G2JVG4_RAT	119.59	15	15	73229	3	3	3	N	32737	Peroxisomal trans-2-enoyl-CoA reductase OS=Rattus norvegicus OX=10116 GN=Pecr PE=1 SV=1
53	93	tr|A0A0G2K8Q8|A0A0G2K8Q8_RAT	119.32	52	52	2061800	3	3	3	N	7099	Ubiquinol-cytochrome c reductase, complex III subunit X OS=Rattus norvegicus OX=10116 GN=Uqcr10 PE=1 SV=1
53	94	tr|B2RYX1|B2RYX1_RAT	119.32	50	50	2061800	3	3	3	N	7462	LOC685322 protein OS=Rattus norvegicus OX=10116 GN=Uqcr10 PE=2 SV=1
41	693	tr|A0A0G2JVL6|A0A0G2JVL6_RAT	118.01	33	33	2506900	4	4	5	N	19965	NADH dehydrogenase [ubiquinone] 1 alpha subcomplex subunit 8 OS=Rattus norvegicus OX=10116 GN=Ndufa8 PE=1 SV=1
35	150	tr|A0A0G2JZJ9|A0A0G2JZJ9_RAT	115.61	33	33	3999000	3	3	7	N	12730	Uncharacterized protein OS=Rattus norvegicus OX=10116 PE=4 SV=1
35	149	tr|B5DEL8|B5DEL8_RAT	115.61	33	33	3999000	3	3	7	N	12700	NADH dehydrogenase (Ubiquinone) Fe-S protein 5 OS=Rattus norvegicus OX=10116 GN=Ndufs5 PE=1 SV=1
34	2161	tr|D3ZE15|D3ZE15_RAT	114.42	41	41	2302400	6	6	8	Y	16777	NADH:ubiquinone oxidoreductase subunit A13 OS=Rattus norvegicus OX=10116 GN=Ndufa13 PE=1 SV=1
69	98	P29147|BDH_RAT	112.67	9	9	482530	2	2	2	N	38202	D-beta-hydroxybutyrate dehydrogenase, mitochondrial OS=Rattus norvegicus OX=10116 GN=Bdh1 PE=1 SV=2
69	99	tr|A0A0G2JSH2|A0A0G2JSH2_RAT	112.67	9	9	482530	2	2	2	N	38333	3-hydroxybutyrate dehydrogenase, type 1, isoform CRA_a OS=Rattus norvegicus OX=10116 GN=Bdh1 PE=1 SV=1
68	2166	Q5XIF3|NDUS4_RAT	110.72	21	21	185470	2	2	2	N	19741	NADH dehydrogenase [ubiquinone] iron-sulfur protein 4, mitochondrial OS=Rattus norvegicus OX=10116 GN=Ndufs4 PE=1 SV=1
46	38	tr|D4A3V2|D4A3V2_RAT	104.02	33	33	3079800	4	4	4	N	15224	NADH dehydrogenase [ubiquinone] 1 alpha subcomplex subunit 6 OS=Rattus norvegicus OX=10116 GN=Ndufa6 PE=1 SV=1
30	55	tr|D3ZZ21|D3ZZ21_RAT	95.6	32	32	5977100	6	6	9	Y	15638	NADH dehydrogenase (Ubiquinone) 1 beta subcomplex, 6 (Predicted) OS=Rattus norvegicus OX=10116 GN=Ndufb6 PE=1 SV=1
54	53	P52873|PYC_RAT	93.57	5	5	1052800	3	3	3	N	129777	Pyruvate carboxylase, mitochondrial OS=Rattus norvegicus OX=10116 GN=Pc PE=1 SV=2
54	54	tr|A0A0G2JTL5|A0A0G2JTL5_RAT	93.57	4	4	1052800	3	3	3	N	140005	Pyruvate carboxylase, mitochondrial OS=Rattus norvegicus OX=10116 GN=Pc PE=1 SV=1
56	2163	Q06647|ATPO_RAT	92.71	16	16	1485400	3	3	3	N	23398	ATP synthase subunit O, mitochondrial OS=Rattus norvegicus OX=10116 GN=Atp5po PE=1 SV=1
50	5	tr|B2GV15|B2GV15_RAT	90.35	6	6	813930	2	2	4	N	53274	Dihydrolipoamide acetyltransferase component of pyruvate dehydrogenase complex OS=Rattus norvegicus OX=10116 GN=Dbt PE=1 SV=1
52	85	tr|A0A0G2JVH4|A0A0G2JVH4_RAT	88.79	4	4	537270	3	3	3	N	86230	MICOS complex subunit MIC60 OS=Rattus norvegicus OX=10116 GN=Immt PE=1 SV=1
40	63	tr|D4A7L4|D4A7L4_RAT	88.05	32	32	5648800	4	4	6	Y	17634	NADH dehydrogenase (Ubiquinone) 1 beta subcomplex, 11 (Predicted) OS=Rattus norvegicus OX=10116 GN=Ndufb11 PE=1 SV=1
58	100	tr|D3ZS58|D3ZS58_RAT	83.41	29	29	1991500	3	3	3	N	10845	NADH dehydrogenase [ubiquinone] 1 alpha subcomplex subunit 2 OS=Rattus norvegicus OX=10116 GN=Ndufa2 PE=1 SV=1
49	41	P19511|AT5F1_RAT	82.59	10	10	1872200	2	2	4	N	28869	ATP synthase F(0) complex subunit B1, mitochondrial OS=Rattus norvegicus OX=10116 GN=Atp5pb PE=1 SV=1
59	2167	Q5M9I5|QCR6_RAT	81.53	29	29	0	2	2	3	Y	10424	Cytochrome b-c1 complex subunit 6, mitochondrial OS=Rattus norvegicus OX=10116 GN=Uqcrh PE=3 SV=1
48	40	Q60587|ECHB_RAT	78.47	5	5	322560	2	2	4	N	51414	Trifunctional enzyme subunit beta, mitochondrial OS=Rattus norvegicus OX=10116 GN=Hadhb PE=1 SV=1
48	50	tr|A0A0G2K330|A0A0G2K330_RAT	78.47	5	5	322560	2	2	4	N	52568	Trifunctional enzyme subunit beta, mitochondrial OS=Rattus norvegicus OX=10116 GN=Hadhb PE=1 SV=1
43	2164	tr|D3ZF13|D3ZF13_RAT	74.64	15	15	2424900	2	2	5	N	17514	Acyl carrier protein OS=Rattus norvegicus OX=10116 GN=Ndufab1 PE=1 SV=1
51	103	Q80W89|NDUAB_RAT	70.34	11	11	2360700	1	1	4	N	14854	NADH dehydrogenase [ubiquinone] 1 alpha subcomplex subunit 11 OS=Rattus norvegicus OX=10116 GN=Ndufa11 PE=2 SV=1
55	2165	tr|D3ZLT1|D3ZLT1_RAT	69.67	31	31	605430	2	2	3	Y	16568	NADH dehydrogenase (Ubiquinone) 1 beta subcomplex, 7 (Predicted) OS=Rattus norvegicus OX=10116 GN=Ndufb7 PE=1 SV=1
37	43	tr|A0A0G2JSH5|A0A0G2JSH5_RAT	66.1	6	6	460430	3	1	6	Y	68759	Serum albumin OS=Rattus norvegicus OX=10116 GN=Alb PE=1 SV=1
70	2170	tr|Q8SEZ1|Q8SEZ1_RAT	61.52	13	13	213650	1	1	2	Y	13087	NADH-ubiquinone oxidoreductase chain 3 OS=Rattus norvegicus OX=10116 GN=Mt-nd3 PE=2 SV=1
70	2171	P05506|NU3M_RAT	61.52	13	13	213650	1	1	2	Y	13087	NADH-ubiquinone oxidoreductase chain 3 OS=Rattus norvegicus OX=10116 GN=Mtnd3 PE=3 SV=3
70	2172	tr|A0A0A1FZ38|A0A0A1FZ38_RAT	61.52	13	13	213650	1	1	2	Y	13071	NADH-ubiquinone oxidoreductase chain 3 OS=Rattus norvegicus OX=10116 GN=ND3 PE=3 SV=1
70	2173	tr|Q06QG9|Q06QG9_RAT	61.52	13	13	213650	1	1	2	Y	13075	NADH-ubiquinone oxidoreductase chain 3 OS=Rattus norvegicus OX=10116 GN=ND3 PE=3 SV=1
64	66	P05508|NU4M_RAT	55.32	6	6	348350	2	2	2	N	51783	NADH-ubiquinone oxidoreductase chain 4 OS=Rattus norvegicus OX=10116 GN=Mtnd4 PE=3 SV=3
64	67	tr|Q06QA2|Q06QA2_RAT	55.32	6	6	348350	2	2	2	N	51787	NADH-ubiquinone oxidoreductase chain 4 OS=Rattus norvegicus OX=10116 GN=ND4 PE=3 SV=1
64	68	tr|Q7HKW3|Q7HKW3_RAT	55.32	6	6	348350	2	2	2	N	51801	NADH-ubiquinone oxidoreductase chain 4 (Fragment) OS=Rattus norvegicus OX=10116 GN=NADH4 PE=3 SV=1
64	70	tr|D2E6K0|D2E6K0_RAT	55.32	6	6	348350	2	2	2	N	51833	NADH-ubiquinone oxidoreductase chain 4 OS=Rattus norvegicus OX=10116 GN=ND4 PE=3 SV=1
64	71	tr|Q06Q89|Q06Q89_RAT	55.32	6	6	348350	2	2	2	N	51819	NADH-ubiquinone oxidoreductase chain 4 OS=Rattus norvegicus OX=10116 GN=ND4 PE=3 SV=1
64	72	tr|Q35737|Q35737_RAT	55.32	6	6	348350	2	2	2	N	51765	NADH-ubiquinone oxidoreductase chain 4 OS=Rattus norvegicus OX=10116 PE=3 SV=1
64	74	tr|Q8HIC6|Q8HIC6_RAT	55.32	6	6	348350	2	2	2	N	51783	NADH-ubiquinone oxidoreductase chain 4 OS=Rattus norvegicus OX=10116 GN=Mt-nd4 PE=3 SV=1
64	75	tr|Q06QE1|Q06QE1_RAT	55.32	6	6	348350	2	2	2	N	51851	NADH-ubiquinone oxidoreductase chain 4 OS=Rattus norvegicus OX=10116 GN=ND4 PE=3 SV=1
64	69	tr|Q06QG7|Q06QG7_RAT	55.32	6	6	348350	2	2	2	N	51791	NADH-ubiquinone oxidoreductase chain 4 OS=Rattus norvegicus OX=10116 GN=ND4 PE=3 SV=1
64	73	tr|A7XYB9|A7XYB9_RAT	55.32	6	6	348350	2	2	2	N	51773	NADH-ubiquinone oxidoreductase chain 4 OS=Rattus norvegicus OX=10116 GN=Nd4 PE=3 SV=1
45	44	P02770|ALBU_RAT	54.91	5	5	1197800	3	1	4	Y	68731	Serum albumin OS=Rattus norvegicus OX=10116 GN=Alb PE=1 SV=2
79	89	tr|Q5UAJ8|Q5UAJ8_RAT	51.36	3	3	821350	1	1	1	Y	38455	NADH-ubiquinone oxidoreductase chain 2 OS=Rattus norvegicus OX=10116 GN=ND2 PE=3 SV=1
79	90	tr|Q06Q97|Q06Q97_RAT	51.36	3	3	821350	1	1	1	Y	38485	NADH-ubiquinone oxidoreductase chain 2 OS=Rattus norvegicus OX=10116 GN=ND2 PE=3 SV=1
79	91	tr|A0A0A1G491|A0A0A1G491_RAT	51.36	3	3	821350	1	1	1	Y	38542	NADH-ubiquinone oxidoreductase chain 2 OS=Rattus norvegicus OX=10116 GN=ND2 PE=3 SV=1
60	106	tr|G3V6I4|G3V6I4_RAT	49.43	9	9	604220	1	1	3	N	37791	Mitochondrial amidoxime reducing component 1 OS=Rattus norvegicus OX=10116 GN=Marc1 PE=1 SV=1
94	26	tr|F1LN92|F1LN92_RAT	48.83	3	3	0	1	1	1	N	89352	AFG3-like matrix AAA peptidase subunit 2 OS=Rattus norvegicus OX=10116 GN=Afg3l2 PE=1 SV=1
95	2174	O70351|HCD2_RAT	43.64	8	8	66864	1	1	1	N	27246	3-hydroxyacyl-CoA dehydrogenase type-2 OS=Rattus norvegicus OX=10116 GN=Hsd17b10 PE=1 SV=3
95	2175	tr|B0BMW2|B0BMW2_RAT	43.64	8	8	66864	1	1	1	N	27250	3-hydroxyacyl-CoA dehydrogenase type-2 OS=Rattus norvegicus OX=10116 GN=Hsd17b10 PE=1 SV=1
80	64	tr|D3ZJY1|D3ZJY1_RAT	34.9	12	12	23666	1	1	1	N	30237	Mitochondrial ribosomal protein L28 OS=Rattus norvegicus OX=10116 GN=Mrpl28 PE=1 SV=1
96	2176	tr|B0BN02|B0BN02_RAT	33.6	4	4	0	1	1	1	N	48444	Metaxin OS=Rattus norvegicus OX=10116 GN=Mtx1 PE=1 SV=1
97	2177	tr|D4A4P3|D4A4P3_RAT	33.25	8	8	599210	1	1	1	N	11267	NADH:ubiquinone oxidoreductase subunit B3 OS=Rattus norvegicus OX=10116 GN=Ndufb3 PE=1 SV=1
63	167	tr|D4A054|D4A054_RAT	43921	1	1	225610	2	2	2	N	341403	RAN-binding protein 2 OS=Rattus norvegicus OX=10116 GN=Ranbp2 PE=1 SV=2
63	168	tr|M0R3M4|M0R3M4_RAT	43921	1	1	225610	2	2	2	N	344396	RAN-binding protein 2 OS=Rattus norvegicus OX=10116 GN=Ranbp2 PE=1 SV=1
98	2179	tr|G3V8T9|G3V8T9_RAT	28.84	9	9	0	1	1	1	Y	21445	Apoptosis regulator BAX OS=Rattus norvegicus OX=10116 GN=Bax PE=1 SV=1
81	2180	tr|Q5BJZ3|Q5BJZ3_RAT	28.22	1	1	352640	1	1	1	Y	113869	Nicotinamide nucleotide transhydrogenase OS=Rattus norvegicus OX=10116 GN=Nnt PE=1 SV=1
72	2181	tr|B2RYS2|B2RYS2_RAT	26.7	9	9	759290	1	1	2	N	13559	Cytochrome b-c1 complex subunit 7 OS=Rattus norvegicus OX=10116 GN=Uqcrb PE=1 SV=1
99	65	Q06437|ODPAT_RAT	26.68	3	3	712170	1	1	1	N	43393	Pyruvate dehydrogenase E1 component subunit alpha, testis-specific form, mitochondrial OS=Rattus norvegicus OX=10116 GN=Pdha2 PE=1 SV=1
113	140	tr|F1LPI6|F1LPI6_RAT	44161	0	0	327450	1	1	1	N	200075	Peripheral-type benzodiazepine receptor-associated protein 1 OS=Rattus norvegicus OX=10116 GN=Tspoap1 PE=4 SV=1
113	141	Q9JIR0|RIMB1_RAT	44161	0	0	327450	1	1	1	N	200202	Peripheral-type benzodiazepine receptor-associated protein 1 OS=Rattus norvegicus OX=10116 GN=Tspoap1 PE=1 SV=2
101	2184	tr|B2RZ31|B2RZ31_RAT	24.54	4	4	111200	1	1	1	Y	28497	NAD-dependent protein deacetylase OS=Rattus norvegicus OX=10116 GN=Sirt3 PE=2 SV=1
101	2185	tr|C6ZII9|C6ZII9_RAT	24.54	3	3	111200	1	1	1	Y	35000	NAD-dependent protein deacetylase OS=Rattus norvegicus OX=10116 GN=Sirt3 PE=1 SV=1
73	246	Q63704|CPT1B_RAT	24.5	1	1	0	1	1	2	N	88217	Carnitine O-palmitoyltransferase 1, muscle isoform OS=Rattus norvegicus OX=10116 GN=Cpt1b PE=1 SV=1
73	288	F1LN46|CPT1C_RAT	24.5	1	1	0	1	1	2	N	90170	Carnitine O-palmitoyltransferase 1, brain isoform OS=Rattus norvegicus OX=10116 GN=Cpt1c PE=1 SV=1
73	330	tr|M0RAQ6|M0RAQ6_RAT	24.5	1	1	0	1	1	2	N	99557	Hexokinase-1 OS=Rattus norvegicus OX=10116 GN=Hk1 PE=1 SV=2
73	333	P05708|HXK1_RAT	24.5	1	1	0	1	1	2	N	102408	Hexokinase-1 OS=Rattus norvegicus OX=10116 GN=Hk1 PE=1 SV=4
102	111	Q5XJW2|G45IP_RAT	24.25	4	4	0	1	1	1	N	26467	Growth arrest and DNA damage-inducible proteins-interacting protein 1 OS=Rattus norvegicus OX=10116 GN=Gadd45gip1 PE=2 SV=2
103	157	tr|F1LTG5|F1LTG5_RAT	24.17	14	14	152290	1	1	1	N	13829	Uncharacterized protein OS=Rattus norvegicus OX=10116 PE=4 SV=2
103	158	P12075|COX5B_RAT	24.17	14	14	152290	1	1	1	N	13915	Cytochrome c oxidase subunit 5B, mitochondrial OS=Rattus norvegicus OX=10116 GN=Cox5b PE=1 SV=2
104	2186	P07895|SODM_RAT	44098	6	6	0	1	1	1	N	24674	Superoxide dismutase [Mn], mitochondrial OS=Rattus norvegicus OX=10116 GN=Sod2 PE=1 SV=2
106	2187	Q06645|AT5G1_RAT	43975	5	5	0	1	1	1	N	14244	ATP synthase F(0) complex subunit C1, mitochondrial OS=Rattus norvegicus OX=10116 GN=Atp5mc1 PE=1 SV=1
106	2188	Q06646|AT5G2_RAT	43975	5	5	0	1	1	1	N	14918	ATP synthase F(0) complex subunit C2, mitochondrial OS=Rattus norvegicus OX=10116 GN=Atp5mc2 PE=1 SV=1
106	2189	tr|Q499S2|Q499S2_RAT	43975	5	5	0	1	1	1	N	14745	ATP synthase F(0) complex subunit C3, mitochondrial OS=Rattus norvegicus OX=10116 GN=Atp5mc3 PE=2 SV=1
106	2190	Q71S46|AT5G3_RAT	43975	5	5	0	1	1	1	N	14693	ATP synthase F(0) complex subunit C3, mitochondrial OS=Rattus norvegicus OX=10116 GN=Atp5mc3 PE=1 SV=1
106	2191	tr|A0A0G2JTN8|A0A0G2JTN8_RAT	43975	5	5	0	1	1	1	N	15465	ATP synthase F(0) complex subunit C2, mitochondrial OS=Rattus norvegicus OX=10116 GN=Atp5mc2 PE=3 SV=1
105	108	O70595|ABCB6_RAT	23.93	1	1	302320	1	1	1	Y	93305	ATP-binding cassette sub-family B member 6, mitochondrial OS=Rattus norvegicus OX=10116 GN=Abcb6 PE=2 SV=1
109	2194	tr|Q5U2T0|Q5U2T0_RAT	22.28	5	5	36644	1	1	1	N	44494	Death associated protein 3 OS=Rattus norvegicus OX=10116 GN=Dap3 PE=2 SV=1
109	2195	tr|F7EZZ0|F7EZZ0_RAT	22.28	5	5	36644	1	1	1	N	45112	Death-associated protein 3 OS=Rattus norvegicus OX=10116 GN=Dap3 PE=1 SV=1
109	256	tr|A0A0G2K264|A0A0G2K264_RAT	22.28	5	5	36644	1	1	1	N	46666	Death-associated protein 3 OS=Rattus norvegicus OX=10116 GN=Dap3 PE=1 SV=1
87	2193	Q5U310|ARMX1_RAT	21.96	2	2	171140	1	1	1	N	51049	Armadillo repeat-containing X-linked protein 1 OS=Rattus norvegicus OX=10116 GN=Armcx1 PE=2 SV=1
110	2196	tr|A0A0U1RRQ1|A0A0U1RRQ1_RAT	21.41	9	9	368300	1	1	1	N	7692	NADH dehydrogenase [ubiquinone] 1 alpha subcomplex subunit 1 OS=Rattus norvegicus OX=10116 GN=Ndufa1 PE=1 SV=1
110	2197	tr|G3V9S6|G3V9S6_RAT	21.41	9	9	368300	1	1	1	N	8148	NADH dehydrogenase [ubiquinone] 1 alpha subcomplex subunit 1 OS=Rattus norvegicus OX=10116 GN=Ndufa1 PE=1 SV=2
110	2198	tr|B4F7B9|B4F7B9_RAT	21.41	7	7	368300	1	1	1	N	9778	Uncharacterized protein (Fragment) OS=Rattus norvegicus OX=10116 GN=Ndufa1 PE=2 SV=1
88	191	Q8R5G2|MUTYH_RAT	21.22	2	2	845700	1	1	1	N	57919	Adenine DNA glycosylase OS=Rattus norvegicus OX=10116 GN=Mutyh PE=2 SV=1
112	2199	Q32Q86|CRY1_RAT	20.96	1	1	2160700	1	1	1	N	66231	Cryptochrome-1 OS=Rattus norvegicus OX=10116 GN=Cry1 PE=1 SV=1
115	2201	Q9Z2L9|NDRG4_RAT	20.46	3	3	0	1	1	1	N	38487	Protein NDRG4 OS=Rattus norvegicus OX=10116 GN=Ndrg4 PE=1 SV=1
116	382	tr|A0A0G2JYY2|A0A0G2JYY2_RAT	20.27	2	2	1501900	1	1	1	N	62571	5-aminolevulinate synthase OS=Rattus norvegicus OX=10116 GN=Alas1 PE=1 SV=1
116	383	tr|A0A0G2K962|A0A0G2K962_RAT	20.27	2	2	1501900	1	1	1	N	71039	5-aminolevulinate synthase OS=Rattus norvegicus OX=10116 GN=Alas1 PE=1 SV=1
116	384	P13195|HEM1_RAT	20.27	2	2	1501900	1	1	1	N	71021	5-aminolevulinate synthase, nonspecific, mitochondrial OS=Rattus norvegicus OX=10116 GN=Alas1 PE=2 SV=2
total 136 proteins

## Sheet: RLM KCl-BM Cont III(2)-IVx
Protein Group	Protein ID	Accession	-10lgP	Coverage (%)	Coverage (%) Sample 6	IBAQ	#Peptides	#Unique	#Spec Sample 6	PTM	Avg. Mass	Description
5	14	P15999|ATPA_RAT	374.67	55	55	96658000	37	37	61	Y	59754	ATP synthase subunit alpha, mitochondrial OS=Rattus norvegicus OX=10116 GN=Atp5f1a PE=1 SV=2
3	13	P07756|CPSM_RAT	352.11	32	32	35426000	38	38	71	Y	164579	Carbamoyl-phosphate synthase [ammonia], mitochondrial OS=Rattus norvegicus OX=10116 GN=Cps1 PE=1 SV=1
2	7	P10719|ATPB_RAT	336.91	75	75	98213000	33	33	82	Y	56354	ATP synthase subunit beta, mitochondrial OS=Rattus norvegicus OX=10116 GN=Atp5f1b PE=1 SV=2
2	8	tr|G3V6D3|G3V6D3_RAT	336.91	75	75	98213000	33	33	82	Y	56345	ATP synthase subunit beta OS=Rattus norvegicus OX=10116 GN=Atp5f1b PE=1 SV=1
1	53	P52873|PYC_RAT	334.87	56	56	102670000	61	61	105	Y	129777	Pyruvate carboxylase, mitochondrial OS=Rattus norvegicus OX=10116 GN=Pc PE=1 SV=2
1	54	tr|A0A0G2JTL5|A0A0G2JTL5_RAT	334.87	51	51	102670000	61	61	105	Y	140005	Pyruvate carboxylase, mitochondrial OS=Rattus norvegicus OX=10116 GN=Pc PE=1 SV=1
6	12	Q68FY0|QCR1_RAT	312.6	59	59	34117000	23	23	52	Y	52849	Cytochrome b-c1 complex subunit 1, mitochondrial OS=Rattus norvegicus OX=10116 GN=Uqcrc1 PE=1 SV=1
4	21	Q64428|ECHA_RAT	312.36	44	44	37818000	34	34	64	Y	82665	Trifunctional enzyme subunit alpha, mitochondrial OS=Rattus norvegicus OX=10116 GN=Hadha PE=1 SV=2
7	9	P00507|AATM_RAT	299.08	65	65	81734000	28	28	44	Y	47314	Aspartate aminotransferase, mitochondrial OS=Rattus norvegicus OX=10116 GN=Got2 PE=1 SV=2
9	1	P32551|QCR2_RAT	286.87	69	69	49716000	25	25	35	Y	48396	Cytochrome b-c1 complex subunit 2, mitochondrial OS=Rattus norvegicus OX=10116 GN=Uqcrc2 PE=1 SV=2
10	6796	P04762|CATA_RAT	273.78	45	45	31692000	21	21	34	Y	59757	Catalase OS=Rattus norvegicus OX=10116 GN=Cat PE=1 SV=3
8	2	Q02253|MMSA_RAT	267.47	50	50	33668000	23	23	38	Y	57808	Methylmalonate-semialdehyde dehydrogenase [acylating], mitochondrial OS=Rattus norvegicus OX=10116 GN=Aldh6a1 PE=1 SV=1
8	3	tr|G3V7J0|G3V7J0_RAT	267.47	50	50	33668000	23	23	38	Y	57748	Aldehyde dehydrogenase family 6, subfamily A1, isoform CRA_b OS=Rattus norvegicus OX=10116 GN=Aldh6a1 PE=1 SV=1
11	229	A2VCW9|AASS_RAT	236.85	22	22	13489000	19	19	28	Y	102908	Alpha-aminoadipic semialdehyde synthase, mitochondrial OS=Rattus norvegicus OX=10116 GN=Aass PE=2 SV=1
24	4338	P63039|CH60_RAT	227.54	18	18	2694500	8	8	11	N	60956	60 kDa heat shock protein, mitochondrial OS=Rattus norvegicus OX=10116 GN=Hspd1 PE=1 SV=1
24	4339	tr|A0A482IDN3|A0A482IDN3_RAT	227.54	18	18	2694500	8	8	11	N	60956	Hsp60 OS=Rattus norvegicus OX=10116 GN=Hspd1 PE=2 SV=1
15	4373	P0C2X9|AL4A1_RAT	216.75	28	28	7200300	10	10	18	Y	61869	Delta-1-pyrroline-5-carboxylate dehydrogenase, mitochondrial OS=Rattus norvegicus OX=10116 GN=Aldh4a1 PE=1 SV=1
22	85	tr|A0A0G2JVH4|A0A0G2JVH4_RAT	209.76	12	12	3129900	9	9	11	N	86230	MICOS complex subunit MIC60 OS=Rattus norvegicus OX=10116 GN=Immt PE=1 SV=1
17	6795	tr|Q68FZ8|Q68FZ8_RAT	207.14	28	28	9730100	12	12	18	N	58678	Propionyl coenzyme A carboxylase, beta polypeptide OS=Rattus norvegicus OX=10116 GN=Pccb PE=1 SV=1
21	35	P13086|SUCA_RAT	205.52	31	31	4547800	8	8	11	Y	36148	Succinate--CoA ligase [ADP/GDP-forming] subunit alpha, mitochondrial OS=Rattus norvegicus OX=10116 GN=Suclg1 PE=2 SV=2
21	36	tr|A0A0H2UHE1|A0A0H2UHE1_RAT	205.52	30	30	4547800	8	8	11	Y	37560	Succinate--CoA ligase [ADP/GDP-forming] subunit alpha, mitochondrial OS=Rattus norvegicus OX=10116 GN=Suclg1 PE=1 SV=1
13	19	P22791|HMCS2_RAT	203.92	36	36	12073000	16	16	23	Y	56912	Hydroxymethylglutaryl-CoA synthase, mitochondrial OS=Rattus norvegicus OX=10116 GN=Hmgcs2 PE=1 SV=1
13	20	tr|Q68G44|Q68G44_RAT	203.92	36	36	12073000	16	16	23	Y	56886	3-hydroxy-3-methylglutaryl coenzyme A synthase OS=Rattus norvegicus OX=10116 GN=Hmgcs2 PE=1 SV=1
20	39	P17764|THIL_RAT	203.46	26	26	4574300	8	8	12	N	44695	Acetyl-CoA acetyltransferase, mitochondrial OS=Rattus norvegicus OX=10116 GN=Acat1 PE=1 SV=1
19	2302	P16970|ABCD3_RAT	201.57	19	19	2930900	9	9	13	Y	75316	ATP-binding cassette sub-family D member 3 OS=Rattus norvegicus OX=10116 GN=Abcd3 PE=1 SV=3
12	40	Q60587|ECHB_RAT	200.5	38	38	17524000	16	16	27	Y	51414	Trifunctional enzyme subunit beta, mitochondrial OS=Rattus norvegicus OX=10116 GN=Hadhb PE=1 SV=1
16	116	P35435|ATPG_RAT	199.46	48	48	12988000	12	12	18	Y	30191	ATP synthase subunit gamma, mitochondrial OS=Rattus norvegicus OX=10116 GN=Atp5f1c PE=1 SV=2
18	28	tr|D3ZFQ8|D3ZFQ8_RAT	191.16	38	38	13900000	10	10	14	Y	35435	Cytochrome c-1 OS=Rattus norvegicus OX=10116 GN=Cyc1 PE=1 SV=3
23	41	P19511|AT5F1_RAT	168.44	30	30	20815000	9	9	11	N	28869	ATP synthase F(0) complex subunit B1, mitochondrial OS=Rattus norvegicus OX=10116 GN=Atp5pb PE=1 SV=1
29	47	Q9WVK3|PECR_RAT	166.94	22	22	1395600	4	4	7	N	32433	Peroxisomal trans-2-enoyl-CoA reductase OS=Rattus norvegicus OX=10116 GN=Pecr PE=2 SV=1
29	48	tr|A0A0G2JVG4|A0A0G2JVG4_RAT	166.94	22	22	1395600	4	4	7	N	32737	Peroxisomal trans-2-enoyl-CoA reductase OS=Rattus norvegicus OX=10116 GN=Pecr PE=1 SV=1
14	9289	P24329|THTR_RAT	165.11	33	33	9651800	8	8	21	Y	33407	Thiosulfate sulfurtransferase OS=Rattus norvegicus OX=10116 GN=Tst PE=1 SV=3
26	4602	B3DMA2|ACD11_RAT	162.27	9	9	3166500	7	7	9	N	87371	Acyl-CoA dehydrogenase family member 11 OS=Rattus norvegicus OX=10116 GN=Acad11 PE=1 SV=1
28	2163	Q06647|ATPO_RAT	142.69	29	29	5665400	6	6	8	N	23398	ATP synthase subunit O, mitochondrial OS=Rattus norvegicus OX=10116 GN=Atp5po PE=1 SV=1
30	37	P20788|UCRI_RAT	138.25	28	28	3454900	6	6	7	N	29446	Cytochrome b-c1 complex subunit Rieske, mitochondrial OS=Rattus norvegicus OX=10116 GN=Uqcrfs1 PE=1 SV=2
41	109	P11240|COX5A_RAT	137.4	30	30	999100	3	3	4	N	16130	Cytochrome c oxidase subunit 5A, mitochondrial OS=Rattus norvegicus OX=10116 GN=Cox5a PE=1 SV=1
32	93	tr|A0A0G2K8Q8|A0A0G2K8Q8_RAT	128.24	52	52	2463400	3	3	7	N	7099	Ubiquinol-cytochrome c reductase, complex III subunit X OS=Rattus norvegicus OX=10116 GN=Uqcr10 PE=1 SV=1
32	94	tr|B2RYX1|B2RYX1_RAT	128.24	50	50	2463400	3	3	7	N	7462	LOC685322 protein OS=Rattus norvegicus OX=10116 GN=Uqcr10 PE=2 SV=1
40	289	P07872|ACOX1_RAT	123.16	8	8	242590	4	4	4	Y	74679	Peroxisomal acyl-coenzyme A oxidase 1 OS=Rattus norvegicus OX=10116 GN=Acox1 PE=1 SV=1
31	51	P10888|COX41_RAT	120.98	29	29	3057200	5	5	7	N	19515	Cytochrome c oxidase subunit 4 isoform 1, mitochondrial OS=Rattus norvegicus OX=10116 GN=Cox4i1 PE=1 SV=1
38	4261	tr|G3V7Y3|G3V7Y3_RAT	117.25	27	27	3782200	4	4	4	N	17563	ATP synthase subunit delta, mitochondrial OS=Rattus norvegicus OX=10116 GN=Atp5f1d PE=1 SV=1
38	4262	P35434|ATPD_RAT	117.25	27	27	3782200	4	4	4	N	17595	ATP synthase subunit delta, mitochondrial OS=Rattus norvegicus OX=10116 GN=Atp5f1d PE=1 SV=2
47	775	tr|A0A0G2K401|A0A0G2K401_RAT	108.57	4	4	1445200	2	2	2	N	79812	Propionyl-CoA carboxylase alpha chain, mitochondrial OS=Rattus norvegicus OX=10116 GN=Pcca PE=1 SV=1
47	777	tr|A0A0G2K5P9|A0A0G2K5P9_RAT	108.57	4	4	1445200	2	2	2	N	81413	Propionyl-CoA carboxylase alpha chain, mitochondrial OS=Rattus norvegicus OX=10116 GN=Pcca PE=1 SV=1
47	776	P14882|PCCA_RAT	108.57	4	4	1445200	2	2	2	N	81623	Propionyl-CoA carboxylase alpha chain, mitochondrial OS=Rattus norvegicus OX=10116 GN=Pcca PE=1 SV=3
27	30	Q7TQ16|QCR8_RAT	107.64	34	34	2211200	4	4	9	N	9849	Cytochrome b-c1 complex subunit 8 OS=Rattus norvegicus OX=10116 GN=Uqcrq PE=3 SV=1
34	9290	P04636|MDHM_RAT	107.58	14	14	1372600	4	4	5	N	35684	Malate dehydrogenase, mitochondrial OS=Rattus norvegicus OX=10116 GN=Mdh2 PE=1 SV=2
33	4260	P31399|ATP5H_RAT	106.2	30	30	1583500	4	4	5	Y	18763	ATP synthase subunit d, mitochondrial OS=Rattus norvegicus OX=10116 GN=Atp5pd PE=1 SV=3
35	101	tr|B2RYT5|B2RYT5_RAT	105.26	35	35	5930900	4	4	5	N	12651	Cox7a2l protein OS=Rattus norvegicus OX=10116 GN=Cox7a2l PE=2 SV=1
43	603	A0A0G2K047|ACSS3_RAT	102.24	4	4	362900	3	3	3	N	74675	Acyl-CoA synthetase short-chain family member 3, mitochondrial OS=Rattus norvegicus OX=10116 GN=Acss3 PE=1 SV=1
37	98	P29147|BDH_RAT	100.97	12	12	1706300	3	3	5	Y	38202	D-beta-hydroxybutyrate dehydrogenase, mitochondrial OS=Rattus norvegicus OX=10116 GN=Bdh1 PE=1 SV=2
37	99	tr|A0A0G2JSH2|A0A0G2JSH2_RAT	100.97	12	12	1706300	3	3	5	Y	38333	3-hydroxybutyrate dehydrogenase, type 1, isoform CRA_a OS=Rattus norvegicus OX=10116 GN=Bdh1 PE=1 SV=1
42	106	tr|G3V6I4|G3V6I4_RAT	100.4	9	9	1088300	1	1	4	N	37791	Mitochondrial amidoxime reducing component 1 OS=Rattus norvegicus OX=10116 GN=Marc1 PE=1 SV=1
25	278	tr|D3ZFJ6|D3ZFJ6_RAT	97.52	17	17	978600	5	5	9	Y	60420	Lactamase, beta OS=Rattus norvegicus OX=10116 GN=Lactb PE=1 SV=1
54	11610	tr|Q7H115|Q7H115_RAT	84.76	5	5	497400	1	1	2	N	29871	Cytochrome c oxidase subunit 3 OS=Rattus norvegicus OX=10116 GN=Mt-co3 PE=3 SV=1
54	11611	tr|I6V4L9|I6V4L9_RAT	84.76	5	5	497400	1	1	2	N	29844	Cytochrome c oxidase subunit 3 OS=Rattus norvegicus OX=10116 GN=COX3 PE=3 SV=1
54	11612	tr|Q8M7G4|Q8M7G4_RAT	84.76	5	5	497400	1	1	2	N	29861	Cytochrome c oxidase subunit 3 OS=Rattus norvegicus OX=10116 PE=2 SV=1
54	11613	tr|A0A096XKT2|A0A096XKT2_RAT	84.76	5	5	497400	1	1	2	N	29901	Cytochrome c oxidase subunit 3 OS=Rattus norvegicus OX=10116 GN=COX3 PE=3 SV=1
54	11614	P05505|COX3_RAT	84.76	5	5	497400	1	1	2	N	29871	Cytochrome c oxidase subunit 3 OS=Rattus norvegicus OX=10116 GN=Mtco3 PE=1 SV=5
54	11615	tr|Q8SEZ2|Q8SEZ2_RAT	84.76	5	5	497400	1	1	2	N	29870	Cytochrome c oxidase subunit 3 (Fragment) OS=Rattus norvegicus OX=10116 GN=COIII PE=3 SV=1
39	2210	Q8VID1|DHRS4_RAT	78.03	8	8	254190	2	2	4	N	29822	Dehydrogenase/reductase SDR family member 4 OS=Rattus norvegicus OX=10116 GN=Dhrs4 PE=2 SV=2
36	2174	O70351|HCD2_RAT	74.56	23	23	997660	3	3	5	Y	27246	3-hydroxyacyl-CoA dehydrogenase type-2 OS=Rattus norvegicus OX=10116 GN=Hsd17b10 PE=1 SV=3
36	2175	tr|B0BMW2|B0BMW2_RAT	74.56	23	23	997660	3	3	5	Y	27250	3-hydroxyacyl-CoA dehydrogenase type-2 OS=Rattus norvegicus OX=10116 GN=Hsd17b10 PE=1 SV=1
91	96	P08461|ODP2_RAT	73.22	2	2	112270	1	1	1	N	67166	Dihydrolipoyllysine-residue acetyltransferase component of pyruvate dehydrogenase complex, mitochondrial OS=Rattus norvegicus OX=10116 GN=Dlat PE=1 SV=3
92	4472	P45953|ACADV_RAT	70.38	3	3	43860	1	1	1	N	70749	Very long-chain specific acyl-CoA dehydrogenase, mitochondrial OS=Rattus norvegicus OX=10116 GN=Acadvl PE=1 SV=1
92	4473	tr|Q5M9H2|Q5M9H2_RAT	70.38	3	3	43860	1	1	1	N	70821	Acyl-Coenzyme A dehydrogenase, very long chain OS=Rattus norvegicus OX=10116 GN=Acadvl PE=1 SV=1
93	25	tr|D3ZG43|D3ZG43_RAT	65.27	4	4	193260	1	1	1	N	30226	NADH dehydrogenase (Ubiquinone) Fe-S protein 3 (Predicted), isoform CRA_c OS=Rattus norvegicus OX=10116 GN=Ndufs3 PE=1 SV=1
45	4264	tr|Q5UAJ5|Q5UAJ5_RAT	61.25	27	27	414950	2	2	3	N	7642	ATP synthase protein 8 OS=Rattus norvegicus OX=10116 GN=ATP8 PE=3 SV=1
46	542	P10860|DHE3_RAT	57.08	3	3	450270	1	1	2	N	61416	Glutamate dehydrogenase 1, mitochondrial OS=Rattus norvegicus OX=10116 GN=Glud1 PE=1 SV=2
52	9291	tr|D3ZUX5|D3ZUX5_RAT	54.76	7	7	160850	2	2	2	N	26435	MICOS complex subunit OS=Rattus norvegicus OX=10116 GN=Chchd3 PE=1 SV=1
94	11616	P10818|CX6A1_RAT	52.78	11	11	115170	1	1	1	N	12301	Cytochrome c oxidase subunit 6A1, mitochondrial OS=Rattus norvegicus OX=10116 GN=Cox6a1 PE=1 SV=2
72	760	tr|F1M953|F1M953_RAT	50.51	3	3	29534	1	1	1	N	73745	Stress-70 protein, mitochondrial OS=Rattus norvegicus OX=10116 GN=Hspa9 PE=1 SV=1
72	761	P48721|GRP75_RAT	50.51	3	3	29534	1	1	1	N	73858	Stress-70 protein, mitochondrial OS=Rattus norvegicus OX=10116 GN=Hspa9 PE=1 SV=3
95	11617	P80432|COX7C_RAT	49.48	14	14	106690	1	1	1	N	7375	Cytochrome c oxidase subunit 7C, mitochondrial OS=Rattus norvegicus OX=10116 GN=Cox7c PE=1 SV=2
53	34	tr|Q5RJN0|Q5RJN0_RAT	46	12	12	62023	2	2	2	N	23945	NADH dehydrogenase (Ubiquinone) Fe-S protein 7 OS=Rattus norvegicus OX=10116 GN=Ndufs7 PE=1 SV=1
44	56	tr|S5RZM8|S5RZM8_RAT	43.34	7	7	2752800	2	2	3	Y	25958	Cytochrome c oxidase subunit 2 OS=Rattus norvegicus OX=10116 GN=COX2 PE=3 SV=1
44	57	P00406|COX2_RAT	43.34	7	7	2752800	2	2	3	Y	25928	Cytochrome c oxidase subunit 2 OS=Rattus norvegicus OX=10116 GN=Mtco2 PE=1 SV=3
44	58	tr|Q37652|Q37652_RAT	43.34	7	7	2752800	2	2	3	Y	26007	Cytochrome c oxidase subunit 2 OS=Rattus norvegicus OX=10116 GN=COXII PE=3 SV=1
44	59	tr|Q5UAJ6|Q5UAJ6_RAT	43.34	7	7	2752800	2	2	3	Y	25942	Cytochrome c oxidase subunit 2 OS=Rattus norvegicus OX=10116 GN=COX2 PE=3 SV=1
44	60	tr|Q8SEZ5|Q8SEZ5_RAT	43.34	7	7	2752800	2	2	3	Y	25928	Cytochrome c oxidase subunit 2 OS=Rattus norvegicus OX=10116 GN=Mt-co2 PE=1 SV=1
44	61	tr|A0A097PE04|A0A097PE04_RAT	43.34	7	7	2752800	2	2	3	Y	25894	Cytochrome c oxidase subunit 2 OS=Rattus norvegicus OX=10116 GN=COX2 PE=3 SV=1
96	11618	P11951|CX6C2_RAT	38.97	12	12	0	1	1	1	N	8455	Cytochrome c oxidase subunit 6C-2 OS=Rattus norvegicus OX=10116 GN=Cox6c2 PE=1 SV=3
99	26	tr|F1LN92|F1LN92_RAT	37.16	1	1	0	1	1	1	N	89352	AFG3-like matrix AAA peptidase subunit 2 OS=Rattus norvegicus OX=10116 GN=Afg3l2 PE=1 SV=1
97	4263	Q6PDU7|ATP5L_RAT	36.33	12	12	0	1	1	1	N	11433	ATP synthase subunit g, mitochondrial OS=Rattus norvegicus OX=10116 GN=Atp5mg PE=1 SV=2
98	4266	D3ZAF6|ATPK_RAT	36.01	14	14	648680	1	1	1	N	10452	ATP synthase subunit f, mitochondrial OS=Rattus norvegicus OX=10116 GN=Atp5mf PE=1 SV=1
73	7185	Q924S5|LONM_RAT	34.44	4	4	429260	1	1	1	N	105792	Lon protease homolog, mitochondrial OS=Rattus norvegicus OX=10116 GN=Lonp1 PE=2 SV=1
74	4857	P32198|CPT1A_RAT	32.15	1	1	536720	1	1	1	N	88126	Carnitine O-palmitoyltransferase 1, liver isoform OS=Rattus norvegicus OX=10116 GN=Cpt1a PE=1 SV=2
48	401	tr|B1WBY5|B1WBY5_RAT	31.43	2	2	1557500	2	2	2	N	63205	DnaJ (Hsp40) homolog, subfamily C, member 11 OS=Rattus norvegicus OX=10116 GN=Dnajc11 PE=1 SV=1
100	11619	P80431|COX7B_RAT	30.72	9	9	328570	1	1	1	N	8995	Cytochrome c oxidase subunit 7B, mitochondrial OS=Rattus norvegicus OX=10116 GN=Cox7b PE=1 SV=3
55	157	tr|F1LTG5|F1LTG5_RAT	28.25	14	14	2537700	1	1	2	N	13829	Uncharacterized protein OS=Rattus norvegicus OX=10116 PE=4 SV=2
55	158	P12075|COX5B_RAT	28.25	14	14	2537700	1	1	2	N	13915	Cytochrome c oxidase subunit 5B, mitochondrial OS=Rattus norvegicus OX=10116 GN=Cox5b PE=1 SV=2
126	140	tr|F1LPI6|F1LPI6_RAT	25.48	0	0	390360	1	1	1	N	200075	Peripheral-type benzodiazepine receptor-associated protein 1 OS=Rattus norvegicus OX=10116 GN=Tspoap1 PE=4 SV=1
126	141	Q9JIR0|RIMB1_RAT	25.48	0	0	390360	1	1	1	N	200202	Peripheral-type benzodiazepine receptor-associated protein 1 OS=Rattus norvegicus OX=10116 GN=Tspoap1 PE=1 SV=2
75	11621	tr|Q6AY49|Q6AY49_RAT	25.23	2	2	0	1	1	1	N	39538	Tumor suppressor candidate 3 OS=Rattus norvegicus OX=10116 GN=Tusc3 PE=1 SV=1
104	181	P61980|HNRPK_RAT	43855	2	2	463410	1	1	1	N	50976	Heterogeneous nuclear ribonucleoprotein K OS=Rattus norvegicus OX=10116 GN=Hnrnpk PE=1 SV=1
108	2187	Q06645|AT5G1_RAT	23.15	5	5	782860	1	1	1	N	14244	ATP synthase F(0) complex subunit C1, mitochondrial OS=Rattus norvegicus OX=10116 GN=Atp5mc1 PE=1 SV=1
108	2188	Q06646|AT5G2_RAT	23.15	5	5	782860	1	1	1	N	14918	ATP synthase F(0) complex subunit C2, mitochondrial OS=Rattus norvegicus OX=10116 GN=Atp5mc2 PE=1 SV=1
108	2189	tr|Q499S2|Q499S2_RAT	23.15	5	5	782860	1	1	1	N	14745	ATP synthase F(0) complex subunit C3, mitochondrial OS=Rattus norvegicus OX=10116 GN=Atp5mc3 PE=2 SV=1
108	2190	Q71S46|AT5G3_RAT	23.15	5	5	782860	1	1	1	N	14693	ATP synthase F(0) complex subunit C3, mitochondrial OS=Rattus norvegicus OX=10116 GN=Atp5mc3 PE=1 SV=1
108	2191	tr|A0A0G2JTN8|A0A0G2JTN8_RAT	23.15	5	5	782860	1	1	1	N	15465	ATP synthase F(0) complex subunit C2, mitochondrial OS=Rattus norvegicus OX=10116 GN=Atp5mc2 PE=3 SV=1
109	622	P18163|ACSL1_RAT	22.19	2	2	1324400	1	1	1	N	78179	Long-chain-fatty-acid--CoA ligase 1 OS=Rattus norvegicus OX=10116 GN=Acsl1 PE=1 SV=1
60	369	P11530|DMD_RAT	44034	0	0	459950	1	1	1	N	425830	Dystrophin OS=Rattus norvegicus OX=10116 GN=Dmd PE=1 SV=2
111	7191	Q6UPE0|CHDH_RAT	21.75	1	1	24171	1	1	1	N	66389	Choline dehydrogenase, mitochondrial OS=Rattus norvegicus OX=10116 GN=Chdh PE=1 SV=1
112	9303	Q63538|MK12_RAT	20.78	4	4	4843900	1	1	1	Y	41985	Mitogen-activated protein kinase 12 OS=Rattus norvegicus OX=10116 GN=Mapk12 PE=1 SV=1
114	654	tr|A0A0G2K1W1|A0A0G2K1W1_RAT	20.45	1	1	1356800	1	1	1	Y	123811	RAB11 family-interacting protein 5 OS=Rattus norvegicus OX=10116 GN=Rab11fip5 PE=1 SV=1
49	712	D3ZLY0|ACKMT_RAT	20.21	6	6	68486	1	1	2	N	24053	ATP synthase subunit C lysine N-methyltransferase OS=Rattus norvegicus OX=10116 GN=Atpsckmt PE=3 SV=1
77	2241	tr|Q99PW9|Q99PW9_RAT	44124	1	1	643740	1	1	1	Y	120572	Huntingtin interacting protein 1 related (Fragment) OS=Rattus norvegicus OX=10116 GN=Hip1r PE=2 SV=1
77	2238	tr|B5DFK5|B5DFK5_RAT	44124	1	1	643740	1	1	1	Y	119424	Hip1r protein OS=Rattus norvegicus OX=10116 GN=Hip1r PE=2 SV=1
77	2240	tr|F1LML7|F1LML7_RAT	44124	1	1	643740	1	1	1	Y	119553	Huntingtin-interacting protein 1-related OS=Rattus norvegicus OX=10116 GN=Hip1r PE=1 SV=1
90	284	Q62812|MYH9_RAT	44002	0	0	0	1	1	1	N	226336	Myosin-9 OS=Rattus norvegicus OX=10116 GN=Myh9 PE=1 SV=3
total 110 proteins

## Sheet: RLM KCl-BM PTP I-III(2)-IV(H)
Protein Group	Protein ID	Accession	-10lgP	Coverage (%)	Coverage (%) Sample 1	IBAQ	#Peptides	#Unique	#Spec Sample 1	PTM	Avg. Mass	Description
1	3	P07756|CPSM_RAT	429.18	40	40	85768000	54	54	66	Y	164579	Carbamoyl-phosphate synthase [ammonia], mitochondrial OS=Rattus norvegicus OX=10116 GN=Cps1 PE=1 SV=1
8	5	Q64428|ECHA_RAT	407.29	46	46	64588000	31	30	41	Y	82665	Trifunctional enzyme subunit alpha, mitochondrial OS=Rattus norvegicus OX=10116 GN=Hadha PE=1 SV=2
5	1	P32551|QCR2_RAT	386.85	79	79	147150000	39	39	52	Y	48396	Cytochrome b-c1 complex subunit 2, mitochondrial OS=Rattus norvegicus OX=10116 GN=Uqcrc2 PE=1 SV=2
3	2	P10860|DHE3_RAT	382.62	66	66	199000000	47	47	59	Y	61416	Glutamate dehydrogenase 1, mitochondrial OS=Rattus norvegicus OX=10116 GN=Glud1 PE=1 SV=2
6	15	Q68FY0|QCR1_RAT	345.05	58	58	72040000	33	33	51	Y	52849	Cytochrome b-c1 complex subunit 1, mitochondrial OS=Rattus norvegicus OX=10116 GN=Uqcrc1 PE=1 SV=1
7	4	P00507|AATM_RAT	343.62	71	71	144720000	31	31	45	Y	47314	Aspartate aminotransferase, mitochondrial OS=Rattus norvegicus OX=10116 GN=Got2 PE=1 SV=2
9	10	P22791|HMCS2_RAT	322.6	50	50	101990000	35	34	41	Y	56912	Hydroxymethylglutaryl-CoA synthase, mitochondrial OS=Rattus norvegicus OX=10116 GN=Hmgcs2 PE=1 SV=1
9	11	tr|Q68G44|Q68G44_RAT	322.6	50	50	101990000	35	34	41	Y	56886	3-hydroxy-3-methylglutaryl coenzyme A synthase OS=Rattus norvegicus OX=10116 GN=Hmgcs2 PE=1 SV=1
13	8	P10719|ATPB_RAT	321.39	69	69	43450000	25	25	30	Y	56354	ATP synthase subunit beta, mitochondrial OS=Rattus norvegicus OX=10116 GN=Atp5f1b PE=1 SV=2
13	9	tr|G3V6D3|G3V6D3_RAT	321.39	69	69	43450000	25	25	30	Y	56345	ATP synthase subunit beta OS=Rattus norvegicus OX=10116 GN=Atp5f1b PE=1 SV=1
11	13	P15999|ATPA_RAT	320.03	45	45	36563000	26	26	33	Y	59754	ATP synthase subunit alpha, mitochondrial OS=Rattus norvegicus OX=10116 GN=Atp5f1a PE=1 SV=2
2	16	P67779|PHB_RAT	310.02	89	89	147040000	32	31	62	Y	29820	Prohibitin OS=Rattus norvegicus OX=10116 GN=Phb PE=1 SV=1
12	6	P52873|PYC_RAT	302.63	30	30	28604000	26	26	32	Y	129777	Pyruvate carboxylase, mitochondrial OS=Rattus norvegicus OX=10116 GN=Pc PE=1 SV=2
12	7	tr|A0A0G2JTL5|A0A0G2JTL5_RAT	302.63	28	28	28604000	26	26	32	Y	140005	Pyruvate carboxylase, mitochondrial OS=Rattus norvegicus OX=10116 GN=Pc PE=1 SV=1
20	24	Q641Y2|NDUS2_RAT	297.4	37	37	28281000	16	16	20	Y	52562	NADH dehydrogenase [ubiquinone] iron-sulfur protein 2, mitochondrial OS=Rattus norvegicus OX=10116 GN=Ndufs2 PE=1 SV=1
25	23	Q561S0|NDUAA_RAT	293.13	46	46	15831000	17	17	18	Y	40493	NADH dehydrogenase [ubiquinone] 1 alpha subcomplex subunit 10, mitochondrial OS=Rattus norvegicus OX=10116 GN=Ndufa10 PE=1 SV=1
14	21	tr|Q5XIH3|Q5XIH3_RAT	274.37	40	40	22204000	20	20	26	Y	50731	NADH dehydrogenase [ubiquinone] flavoprotein 1, mitochondrial OS=Rattus norvegicus OX=10116 GN=Ndufv1 PE=1 SV=1
10	12	Q66HF1|NDUS1_RAT	272.99	49	49	78123000	33	33	40	Y	79412	NADH-ubiquinone oxidoreductase 75 kDa subunit, mitochondrial OS=Rattus norvegicus OX=10116 GN=Ndufs1 PE=1 SV=1
17	14	Q5BK63|NDUA9_RAT	268.38	55	55	29079000	21	21	21	Y	42559	NADH dehydrogenase [ubiquinone] 1 alpha subcomplex subunit 9, mitochondrial OS=Rattus norvegicus OX=10116 GN=Ndufa9 PE=1 SV=2
18	20	tr|F1LN92|F1LN92_RAT	265.95	32	32	16500000	21	20	21	Y	89352	AFG3-like matrix AAA peptidase subunit 2 OS=Rattus norvegicus OX=10116 GN=Afg3l2 PE=1 SV=1
4	18	Q5XIH7|PHB2_RAT	265.54	82	82	126220000	30	30	53	Y	33312	Prohibitin-2 OS=Rattus norvegicus OX=10116 GN=Phb2 PE=1 SV=1
19	22	tr|A0A0G2JVH4|A0A0G2JVH4_RAT	264	25	25	17778000	18	18	20	Y	86230	MICOS complex subunit MIC60 OS=Rattus norvegicus OX=10116 GN=Immt PE=1 SV=1
29	28	P18163|ACSL1_RAT	263.52	20	20	17423000	14	14	14	Y	78179	Long-chain-fatty-acid--CoA ligase 1 OS=Rattus norvegicus OX=10116 GN=Acsl1 PE=1 SV=1
24	36	tr|D3ZG43|D3ZG43_RAT	261.82	51	51	45523000	13	13	18	N	30226	NADH dehydrogenase (Ubiquinone) Fe-S protein 3 (Predicted), isoform CRA_c OS=Rattus norvegicus OX=10116 GN=Ndufs3 PE=1 SV=1
16	45	P20788|UCRI_RAT	252.67	41	41	31501000	15	15	22	N	29446	Cytochrome b-c1 complex subunit Rieske, mitochondrial OS=Rattus norvegicus OX=10116 GN=Uqcrfs1 PE=1 SV=2
15	31	Q60587|ECHB_RAT	251.23	35	35	22242000	17	17	25	Y	51414	Trifunctional enzyme subunit beta, mitochondrial OS=Rattus norvegicus OX=10116 GN=Hadhb PE=1 SV=1
26	27	P85834|EFTU_RAT	250.81	33	33	12366000	14	14	15	Y	49522	Elongation factor Tu, mitochondrial OS=Rattus norvegicus OX=10116 GN=Tufm PE=1 SV=1
28	32	P13086|SUCA_RAT	247.11	41	41	17347000	13	13	14	Y	36148	Succinate--CoA ligase [ADP/GDP-forming] subunit alpha, mitochondrial OS=Rattus norvegicus OX=10116 GN=Suclg1 PE=2 SV=2
28	33	tr|A0A0H2UHE1|A0A0H2UHE1_RAT	247.11	39	39	17347000	13	13	14	Y	37560	Succinate--CoA ligase [ADP/GDP-forming] subunit alpha, mitochondrial OS=Rattus norvegicus OX=10116 GN=Suclg1 PE=1 SV=1
23	37	Q4FZT0|STML2_RAT	237.69	39	39	29327000	16	16	18	Y	38414	Stomatin-like protein 2, mitochondrial OS=Rattus norvegicus OX=10116 GN=Stoml2 PE=1 SV=1
38	93	tr|D4A565|D4A565_RAT	229.37	31	31	10615000	8	8	10	N	21664	NADH dehydrogenase (Ubiquinone) 1 beta subcomplex, 5 (Predicted), isoform CRA_b OS=Rattus norvegicus OX=10116 GN=Ndufb5 PE=1 SV=1
21	25	tr|B2GV15|B2GV15_RAT	225.55	49	49	20838000	17	17	20	N	53274	Dihydrolipoamide acetyltransferase component of pyruvate dehydrogenase complex OS=Rattus norvegicus OX=10116 GN=Dbt PE=1 SV=1
27	42	tr|D3ZFQ8|D3ZFQ8_RAT	224.57	38	38	32944000	11	11	15	Y	35435	Cytochrome c-1 OS=Rattus norvegicus OX=10116 GN=Cyc1 PE=1 SV=3
30	48	Q9WVK3|PECR_RAT	222.16	32	32	18283000	7	7	11	Y	32433	Peroxisomal trans-2-enoyl-CoA reductase OS=Rattus norvegicus OX=10116 GN=Pecr PE=2 SV=1
30	49	tr|A0A0G2JVG4|A0A0G2JVG4_RAT	222.16	31	31	18283000	7	7	11	Y	32737	Peroxisomal trans-2-enoyl-CoA reductase OS=Rattus norvegicus OX=10116 GN=Pecr PE=1 SV=1
31	47	P0C2X9|AL4A1_RAT	217.83	17	17	6482400	9	9	11	Y	61869	Delta-1-pyrroline-5-carboxylate dehydrogenase, mitochondrial OS=Rattus norvegicus OX=10116 GN=Aldh4a1 PE=1 SV=1
32	46	P17764|THIL_RAT	215.94	25	25	7123200	8	8	10	Y	44695	Acetyl-CoA acetyltransferase, mitochondrial OS=Rattus norvegicus OX=10116 GN=Acat1 PE=1 SV=1
33	44	P16970|ABCD3_RAT	212.7	16	16	5556100	10	10	10	Y	75316	ATP-binding cassette sub-family D member 3 OS=Rattus norvegicus OX=10116 GN=Abcd3 PE=1 SV=3
41	54	tr|D4A0T0|D4A0T0_RAT	208.11	43	43	10083000	7	7	8	Y	20859	NADH:ubiquinone oxidoreductase subunit B10 OS=Rattus norvegicus OX=10116 GN=Ndufb10 PE=1 SV=1
84	170	Q63362|NDUA5_RAT	203.96	41	41	2868600	3	3	4	N	13412	NADH dehydrogenase [ubiquinone] 1 alpha subcomplex subunit 5 OS=Rattus norvegicus OX=10116 GN=Ndufa5 PE=1 SV=3
36	51	tr|Q5EBA4|Q5EBA4_RAT	202.91	27	27	10255000	8	8	10	Y	33215	Nipsnap1 protein (Fragment) OS=Rattus norvegicus OX=10116 GN=Nipsnap1 PE=2 SV=1
36	52	tr|G3V728|G3V728_RAT	202.91	27	27	10255000	8	8	10	Y	33346	4-nitrophenylphosphatase domain and non-neuronal SNAP25-like protein homolog 1 (C. elegans), isoform CRA_b OS=Rattus norvegicus OX=10116 GN=Nipsnap1 PE=1 SV=1
64	64	Q02253|MMSA_RAT	195.86	13	13	4306200	5	5	5	Y	57808	Methylmalonate-semialdehyde dehydrogenase [acylating], mitochondrial OS=Rattus norvegicus OX=10116 GN=Aldh6a1 PE=1 SV=1
64	65	tr|G3V7J0|G3V7J0_RAT	195.86	13	13	4306200	5	5	5	Y	57748	Aldehyde dehydrogenase family 6, subfamily A1, isoform CRA_b OS=Rattus norvegicus OX=10116 GN=Aldh6a1 PE=1 SV=1
22	39	P29147|BDH_RAT	195.15	29	29	18391000	16	15	19	Y	38202	D-beta-hydroxybutyrate dehydrogenase, mitochondrial OS=Rattus norvegicus OX=10116 GN=Bdh1 PE=1 SV=2
22	40	tr|A0A0G2JSH2|A0A0G2JSH2_RAT	195.15	29	29	18391000	16	15	19	Y	38333	3-hydroxybutyrate dehydrogenase, type 1, isoform CRA_a OS=Rattus norvegicus OX=10116 GN=Bdh1 PE=1 SV=1
35	38	tr|B0BMT9|B0BMT9_RAT	194.51	24	24	7208900	9	9	10	N	50202	Sqrdl protein OS=Rattus norvegicus OX=10116 GN=Sqor PE=1 SV=1
37	60	tr|B0BNE6|B0BNE6_RAT	194.08	29	29	9149700	8	8	10	Y	23970	NADH dehydrogenase (Ubiquinone) Fe-S protein 8 (Predicted), isoform CRA_a OS=Rattus norvegicus OX=10116 GN=Ndufs8 PE=1 SV=1
40	55	P24329|THTR_RAT	191.86	29	29	8038400	8	8	9	N	33407	Thiosulfate sulfurtransferase OS=Rattus norvegicus OX=10116 GN=Tst PE=1 SV=3
60	61	P63039|CH60_RAT	187.49	13	13	2185500	5	5	5	N	60956	60 kDa heat shock protein, mitochondrial OS=Rattus norvegicus OX=10116 GN=Hspd1 PE=1 SV=1
60	62	tr|A0A482IDN3|A0A482IDN3_RAT	187.49	13	13	2185500	5	5	5	N	60956	Hsp60 OS=Rattus norvegicus OX=10116 GN=Hspd1 PE=2 SV=1
73	91	P45953|ACADV_RAT	182.91	10	10	1476700	3	3	4	N	70749	Very long-chain specific acyl-CoA dehydrogenase, mitochondrial OS=Rattus norvegicus OX=10116 GN=Acadvl PE=1 SV=1
73	92	tr|Q5M9H2|Q5M9H2_RAT	182.91	10	10	1476700	3	3	4	N	70821	Acyl-Coenzyme A dehydrogenase, very long chain OS=Rattus norvegicus OX=10116 GN=Acadvl PE=1 SV=1
54	69	Q5XIF3|NDUS4_RAT	182.02	34	34	2413200	6	6	6	N	19741	NADH dehydrogenase [ubiquinone] iron-sulfur protein 4, mitochondrial OS=Rattus norvegicus OX=10116 GN=Ndufs4 PE=1 SV=1
52	73	tr|B2RYS8|B2RYS8_RAT	180.1	28	28	8363800	4	4	6	Y	21959	NADH dehydrogenase [ubiquinone] 1 beta subcomplex subunit 8, mitochondrial OS=Rattus norvegicus OX=10116 GN=Ndufb8 PE=1 SV=1
48	59	tr|D3ZJY1|D3ZJY1_RAT	178.84	35	35	3394800	6	6	7	N	30237	Mitochondrial ribosomal protein L28 OS=Rattus norvegicus OX=10116 GN=Mrpl28 PE=1 SV=1
53	53	B3DMA2|ACD11_RAT	178.16	12	12	2023800	6	6	6	N	87371	Acyl-CoA dehydrogenase family member 11 OS=Rattus norvegicus OX=10116 GN=Acad11 PE=1 SV=1
39	67	tr|Q5RJN0|Q5RJN0_RAT	170.89	26	26	13246000	8	8	9	N	23945	NADH dehydrogenase (Ubiquinone) Fe-S protein 7 OS=Rattus norvegicus OX=10116 GN=Ndufs7 PE=1 SV=1
57	76	O70351|HCD2_RAT	168.95	32	32	9910400	5	5	6	Y	27246	3-hydroxyacyl-CoA dehydrogenase type-2 OS=Rattus norvegicus OX=10116 GN=Hsd17b10 PE=1 SV=3
57	77	tr|B0BMW2|B0BMW2_RAT	168.95	32	32	9910400	5	5	6	Y	27250	3-hydroxyacyl-CoA dehydrogenase type-2 OS=Rattus norvegicus OX=10116 GN=Hsd17b10 PE=1 SV=1
67	106	tr|D3ZXF9|D3ZXF9_RAT	168.55	18	18	2117100	4	4	5	N	29441	Mitochondrial ribosomal protein L12 OS=Rattus norvegicus OX=10116 GN=Mrpl12 PE=1 SV=1
90	145	P62909|RS3_RAT	166	17	17	4154300	3	3	3	Y	26674	40S ribosomal protein S3 OS=Rattus norvegicus OX=10116 GN=Rps3 PE=1 SV=1
55	57	tr|D4A131|D4A131_RAT	154.79	35	35	3910000	6	6	6	N	33082	Mitochondrial ribosomal protein L4 OS=Rattus norvegicus OX=10116 GN=Mrpl4 PE=1 SV=1
81	84	tr|Q2TVU3|Q2TVU3_RAT	153.85	19	19	997960	4	4	4	Y	49412	TID1 OS=Rattus norvegicus OX=10116 GN=Dnaja3 PE=2 SV=1
81	85	tr|A0A0G2K4Y1|A0A0G2K4Y1_RAT	153.85	19	19	997960	4	4	4	Y	49416	DnaJ heat shock protein family (Hsp40) member A3 OS=Rattus norvegicus OX=10116 GN=Dnaja3 PE=1 SV=1
81	86	tr|Q2UZS7|Q2UZS7_RAT	153.85	18	18	997960	4	4	4	Y	52399	Tid-1 long isoform OS=Rattus norvegicus OX=10116 GN=Dnaja3 PE=2 SV=1
81	87	tr|A0A0G2K5E4|A0A0G2K5E4_RAT	153.85	18	18	997960	4	4	4	Y	52403	DnaJ heat shock protein family (Hsp40) member A3 OS=Rattus norvegicus OX=10116 GN=Dnaja3 PE=1 SV=1
42	72	tr|F1LXA0|F1LXA0_RAT	153.63	38	38	7140800	6	6	8	N	17178	NADH dehydrogenase [ubiquinone] 1 alpha subcomplex subunit 12 OS=Rattus norvegicus OX=10116 GN=Ndufa12 PE=1 SV=2
59	113	tr|B2RYW3|B2RYW3_RAT	148.13	25	25	6365300	6	6	6	N	21892	NADH dehydrogenase (Ubiquinone) 1 beta subcomplex, 9 OS=Rattus norvegicus OX=10116 GN=Ndufb9 PE=1 SV=1
47	63	Q09073|ADT2_RAT	147.82	24	24	4899900	7	7	7	Y	32901	ADP/ATP translocase 2 OS=Rattus norvegicus OX=10116 GN=Slc25a5 PE=1 SV=3
91	144	tr|A0A0G2JVL6|A0A0G2JVL6_RAT	147.66	33	33	2387400	3	3	3	N	19965	NADH dehydrogenase [ubiquinone] 1 alpha subcomplex subunit 8 OS=Rattus norvegicus OX=10116 GN=Ndufa8 PE=1 SV=1
51	68	tr|Q5UAJ6|Q5UAJ6_RAT	147.14	25	25	9661900	5	5	6	Y	25942	Cytochrome c oxidase subunit 2 OS=Rattus norvegicus OX=10116 GN=COX2 PE=3 SV=1
34	58	P19234|NDUV2_RAT	143.9	31	31	30551000	9	9	10	N	27378	NADH dehydrogenase [ubiquinone] flavoprotein 2, mitochondrial OS=Rattus norvegicus OX=10116 GN=Ndufv2 PE=1 SV=2
43	50	P10888|COX41_RAT	135.95	38	38	8531200	7	7	8	N	19515	Cytochrome c oxidase subunit 4 isoform 1, mitochondrial OS=Rattus norvegicus OX=10116 GN=Cox4i1 PE=1 SV=1
58	110	tr|D3ZCZ9|D3ZCZ9_RAT	135.49	34	34	3687500	4	4	6	Y	13040	NADH dehydrogenase [ubiquinone] iron-sulfur protein 6, mitochondrial OS=Rattus norvegicus OX=10116 GN=LOC100912599 PE=1 SV=1
70	88	tr|D4A3V2|D4A3V2_RAT	134.14	33	33	4426400	4	4	5	N	15224	NADH dehydrogenase [ubiquinone] 1 alpha subcomplex subunit 6 OS=Rattus norvegicus OX=10116 GN=Ndufa6 PE=1 SV=1
65	66	Q8VID1|DHRS4_RAT	133.76	18	18	2671700	5	5	5	Y	29822	Dehydrogenase/reductase SDR family member 4 OS=Rattus norvegicus OX=10116 GN=Dhrs4 PE=2 SV=2
49	56	P04636|MDHM_RAT	133.59	18	18	2311900	6	6	6	Y	35684	Malate dehydrogenase, mitochondrial OS=Rattus norvegicus OX=10116 GN=Mdh2 PE=1 SV=2
82	90	tr|D3ZMR9|D3ZMR9_RAT	125.22	24	24	1815400	4	4	4	N	23390	Mitochondrial ribosomal protein L21 OS=Rattus norvegicus OX=10116 GN=Mrpl21 PE=1 SV=1
94	156	P70584|ACDSB_RAT	124.78	7	7	2063800	3	3	3	Y	47824	Short/branched chain specific acyl-CoA dehydrogenase, mitochondrial OS=Rattus norvegicus OX=10116 GN=Acadsb PE=1 SV=1
94	157	tr|A0A0A0MY00|A0A0A0MY00_RAT	124.78	7	7	2063800	3	3	3	Y	52043	Short/branched chain-specific acyl-CoA dehydrogenase, mitochondrial OS=Rattus norvegicus OX=10116 GN=Acadsb PE=1 SV=2
78	96	tr|D3ZFJ6|D3ZFJ6_RAT	122.91	12	12	2279000	3	3	4	N	60420	Lactamase, beta OS=Rattus norvegicus OX=10116 GN=Lactb PE=1 SV=1
93	152	tr|D3ZX69|D3ZX69_RAT	122.75	15	15	856680	2	2	3	Y	29466	39S ribosomal protein L10, mitochondrial OS=Rattus norvegicus OX=10116 GN=Mrpl10 PE=1 SV=1
93	153	P0C2C4|RM10_RAT	122.75	15	15	856680	2	2	3	Y	29940	39S ribosomal protein L10, mitochondrial OS=Rattus norvegicus OX=10116 GN=Mrpl10 PE=1 SV=1
170	181	Q6AXV4|SAM50_RAT	121.41	4	4	788140	1	1	1	N	51960	Sorting and assembly machinery component 50 homolog OS=Rattus norvegicus OX=10116 GN=Samm50 PE=1 SV=1
83	105	tr|D3ZF13|D3ZF13_RAT	121.33	21	21	5391600	4	4	4	Y	17514	Acyl carrier protein OS=Rattus norvegicus OX=10116 GN=Ndufab1 PE=1 SV=1
66	100	tr|D3ZE15|D3ZE15_RAT	120.53	25	25	6146700	5	5	5	Y	16777	NADH:ubiquinone oxidoreductase subunit A13 OS=Rattus norvegicus OX=10116 GN=Ndufa13 PE=1 SV=1
46	95	tr|Q6QI09|Q6QI09_RAT	119.69	9	9	1089200	3	3	7	Y	67721	ATP synthase subunit gamma, mitochondrial OS=Rattus norvegicus OX=10116 GN=Taf3 PE=1 SV=1
46	97	P35435|ATPG_RAT	119.69	20	20	1089200	3	3	7	Y	30191	ATP synthase subunit gamma, mitochondrial OS=Rattus norvegicus OX=10116 GN=Atp5f1c PE=1 SV=2
45	75	tr|B1WBY5|B1WBY5_RAT	118.4	12	12	9331300	6	6	7	N	63205	DnaJ (Hsp40) homolog, subfamily C, member 11 OS=Rattus norvegicus OX=10116 GN=Dnajc11 PE=1 SV=1
56	70	tr|B2RYT5|B2RYT5_RAT	118.39	44	44	5012600	5	5	6	N	12651	Cox7a2l protein OS=Rattus norvegicus OX=10116 GN=Cox7a2l PE=2 SV=1
114	154	tr|A0A0G2K8Q8|A0A0G2K8Q8_RAT	116.94	39	39	2333600	2	2	2	N	7099	Ubiquinol-cytochrome c reductase, complex III subunit X OS=Rattus norvegicus OX=10116 GN=Uqcr10 PE=1 SV=1
114	172	tr|B2RYX1|B2RYX1_RAT	116.94	38	38	2333600	2	2	2	N	7462	LOC685322 protein OS=Rattus norvegicus OX=10116 GN=Uqcr10 PE=2 SV=1
50	112	tr|Q5PQZ9|Q5PQZ9_RAT	115.26	27	27	3205900	5	5	6	N	14359	NADH dehydrogenase [ubiquinone] 1 subunit C2 OS=Rattus norvegicus OX=10116 GN=Ndufc2 PE=1 SV=1
80	71	tr|F1LPG5|F1LPG5_RAT	114.95	47	47	4271700	4	4	4	N	15064	NADH:ubiquinone oxidoreductase subunit B4 OS=Rattus norvegicus OX=10116 GN=Ndufb4 PE=1 SV=1
62	78	P17178|CP27A_RAT	113.64	14	14	2531000	5	5	5	N	60733	Sterol 26-hydroxylase, mitochondrial OS=Rattus norvegicus OX=10116 GN=Cyp27a1 PE=1 SV=1
62	79	tr|A0A0H2UHN7|A0A0H2UHN7_RAT	113.64	13	13	2531000	5	5	5	N	62492	RCG24013, isoform CRA_a OS=Rattus norvegicus OX=10116 GN=Cyp27a1 PE=1 SV=1
44	104	tr|A9UMV9|A9UMV9_RAT	113.41	33	33	4859600	4	4	8	N	12500	NADH:ubiquinone oxidoreductase subunit A7 OS=Rattus norvegicus OX=10116 GN=Ndufa7 PE=1 SV=1
74	74	tr|D3ZS58|D3ZS58_RAT	112.49	40	40	2699900	4	4	4	N	10845	NADH dehydrogenase [ubiquinone] 1 alpha subcomplex subunit 2 OS=Rattus norvegicus OX=10116 GN=Ndufa2 PE=1 SV=1
119	205	Q5M9I5|QCR6_RAT	111.86	21	21	2307300	1	1	2	N	10424	Cytochrome b-c1 complex subunit 6, mitochondrial OS=Rattus norvegicus OX=10116 GN=Uqcrh PE=3 SV=1
69	133	P12075|COX5B_RAT	111.85	35	35	7311700	4	4	5	Y	13915	Cytochrome c oxidase subunit 5B, mitochondrial OS=Rattus norvegicus OX=10116 GN=Cox5b PE=1 SV=2
76	121	P08461|ODP2_RAT	111.55	7	7	494620	4	3	4	N	67166	Dihydrolipoyllysine-residue acetyltransferase component of pyruvate dehydrogenase complex, mitochondrial OS=Rattus norvegicus OX=10116 GN=Dlat PE=1 SV=3
92	148	F1LU71|AUHM_RAT	111.09	12	12	639520	3	3	3	Y	33341	Methylglutaconyl-CoA hydratase, mitochondrial OS=Rattus norvegicus OX=10116 GN=Auh PE=1 SV=2
63	122	P05508|NU4M_RAT	109.96	10	10	1275800	4	4	5	Y	51783	NADH-ubiquinone oxidoreductase chain 4 OS=Rattus norvegicus OX=10116 GN=Mtnd4 PE=3 SV=3
63	123	tr|A7XYB9|A7XYB9_RAT	109.96	10	10	1275800	4	4	5	Y	51773	NADH-ubiquinone oxidoreductase chain 4 OS=Rattus norvegicus OX=10116 GN=Nd4 PE=3 SV=1
63	124	tr|Q06QA2|Q06QA2_RAT	109.96	10	10	1275800	4	4	5	Y	51787	NADH-ubiquinone oxidoreductase chain 4 OS=Rattus norvegicus OX=10116 GN=ND4 PE=3 SV=1
63	125	tr|Q7HKW3|Q7HKW3_RAT	109.96	10	10	1275800	4	4	5	Y	51801	NADH-ubiquinone oxidoreductase chain 4 (Fragment) OS=Rattus norvegicus OX=10116 GN=NADH4 PE=3 SV=1
63	126	tr|Q06QG7|Q06QG7_RAT	109.96	10	10	1275800	4	4	5	Y	51791	NADH-ubiquinone oxidoreductase chain 4 OS=Rattus norvegicus OX=10116 GN=ND4 PE=3 SV=1
63	127	tr|Q06Q89|Q06Q89_RAT	109.96	10	10	1275800	4	4	5	Y	51819	NADH-ubiquinone oxidoreductase chain 4 OS=Rattus norvegicus OX=10116 GN=ND4 PE=3 SV=1
63	128	tr|Q35737|Q35737_RAT	109.96	10	10	1275800	4	4	5	Y	51765	NADH-ubiquinone oxidoreductase chain 4 OS=Rattus norvegicus OX=10116 PE=3 SV=1
63	129	tr|Q8HIC6|Q8HIC6_RAT	109.96	10	10	1275800	4	4	5	Y	51783	NADH-ubiquinone oxidoreductase chain 4 OS=Rattus norvegicus OX=10116 GN=Mt-nd4 PE=3 SV=1
63	130	tr|D2E6K0|D2E6K0_RAT	109.96	10	10	1275800	4	4	5	Y	51833	NADH-ubiquinone oxidoreductase chain 4 OS=Rattus norvegicus OX=10116 GN=ND4 PE=3 SV=1
63	131	tr|Q06QE1|Q06QE1_RAT	109.96	10	10	1275800	4	4	5	Y	51851	NADH-ubiquinone oxidoreductase chain 4 OS=Rattus norvegicus OX=10116 GN=ND4 PE=3 SV=1
71	94	Q7TQ16|QCR8_RAT	108.19	46	46	4040100	5	5	5	N	9849	Cytochrome b-c1 complex subunit 8 OS=Rattus norvegicus OX=10116 GN=Uqcrq PE=3 SV=1
75	119	P32198|CPT1A_RAT	103.08	5	5	1299400	3	3	4	N	88126	Carnitine O-palmitoyltransferase 1, liver isoform OS=Rattus norvegicus OX=10116 GN=Cpt1a PE=1 SV=2
99	120	tr|A0A0G2K264|A0A0G2K264_RAT	102.04	8	8	728990	3	1	3	N	46666	Death-associated protein 3 OS=Rattus norvegicus OX=10116 GN=Dap3 PE=1 SV=1
68	115	tr|D3ZIL6|D3ZIL6_RAT	101.55	18	18	2891300	4	3	5	N	31779	Enoyl CoA hydratase domain-containing 2 OS=Rattus norvegicus OX=10116 GN=Echdc2 PE=1 SV=1
101	138	tr|Q5U2T0|Q5U2T0_RAT	100.69	7	7	7114400	3	1	3	N	44494	Death associated protein 3 OS=Rattus norvegicus OX=10116 GN=Dap3 PE=2 SV=1
101	139	tr|F7EZZ0|F7EZZ0_RAT	100.69	7	7	7114400	3	1	3	N	45112	Death-associated protein 3 OS=Rattus norvegicus OX=10116 GN=Dap3 PE=1 SV=1
102	140	tr|M0R6J0|M0R6J0_RAT	100.52	9	9	2367400	3	3	3	N	38374	Mitochondrial ribosomal protein L39 OS=Rattus norvegicus OX=10116 GN=Mrpl39 PE=1 SV=2
197	206	P13803|ETFA_RAT	98.35	8	8	641310	1	1	1	N	34951	Electron transfer flavoprotein subunit alpha, mitochondrial OS=Rattus norvegicus OX=10116 GN=Etfa PE=1 SV=4
134	247	tr|B2GV62|B2GV62_RAT	96.32	14	14	123010	1	1	2	N	17526	Mitochondrial ribosomal protein L20 OS=Rattus norvegicus OX=10116 GN=Mrpl20 PE=1 SV=1
171	196	tr|B0BN52|B0BN52_RAT	94.67	5	5	384060	1	1	1	N	33528	Mitochondrial carrier 2 OS=Rattus norvegicus OX=10116 GN=Mtch2 PE=2 SV=1
171	197	tr|A0A0G2K459|A0A0G2K459_RAT	94.67	5	5	384060	1	1	1	N	33758	Mitochondrial carrier 2 OS=Rattus norvegicus OX=10116 GN=Mtch2 PE=1 SV=1
171	212	tr|A0A0G2K7P7|A0A0G2K7P7_RAT	94.67	7	7	384060	1	1	1	N	26999	Mitochondrial carrier 2 OS=Rattus norvegicus OX=10116 GN=Mtch2 PE=1 SV=1
86	111	Q5RJR8|LRC59_RAT	93.61	10	10	1102700	3	3	3	N	34869	Leucine-rich repeat-containing protein 59 OS=Rattus norvegicus OX=10116 GN=Lrrc59 PE=1 SV=1
123	171	tr|Q5M949|Q5M949_RAT	93.59	13	13	714950	2	2	2	Y	28340	Nipsnap homolog 3A (C. elegans) OS=Rattus norvegicus OX=10116 GN=Nipsnap3b PE=1 SV=1
250	249	tr|D3ZY44|D3ZY44_RAT	91.57	5	5	149740	1	1	1	N	32176	Mitochondrial ribosomal protein S2 OS=Rattus norvegicus OX=10116 GN=Mrps2 PE=1 SV=1
249	248	tr|G3V6I4|G3V6I4_RAT	91.37	9	9	2932800	1	1	1	N	37791	Mitochondrial amidoxime reducing component 1 OS=Rattus norvegicus OX=10116 GN=Marc1 PE=1 SV=1
111	159	tr|Q4G067|Q4G067_RAT	90.92	8	8	1687500	2	2	2	N	37440	Mitochondrial ribosomal protein L44 OS=Rattus norvegicus OX=10116 GN=Mrpl44 PE=1 SV=1
135	250	Q80W89|NDUAB_RAT	90.19	11	11	1599300	1	1	2	N	14854	NADH dehydrogenase [ubiquinone] 1 alpha subcomplex subunit 11 OS=Rattus norvegicus OX=10116 GN=Ndufa11 PE=2 SV=1
172	219	tr|Q8HN20|Q8HN20_RAT	88.81	26	26	498640	1	1	1	Y	8534	NADH-ubiquinone oxidoreductase chain 1 (Fragment) OS=Rattus norvegicus OX=10116 PE=2 SV=1
172	220	tr|Q8SEZ8|Q8SEZ8_RAT	88.81	6	6	498640	1	1	1	Y	36133	NADH-ubiquinone oxidoreductase chain 1 (Fragment) OS=Rattus norvegicus OX=10116 GN=NADH1 PE=3 SV=1
172	221	P03889|NU1M_RAT	88.81	6	6	498640	1	1	1	Y	36145	NADH-ubiquinone oxidoreductase chain 1 OS=Rattus norvegicus OX=10116 GN=Mtnd1 PE=1 SV=3
172	222	tr|Q8HID1|Q8HID1_RAT	88.81	6	6	498640	1	1	1	Y	36145	NADH-ubiquinone oxidoreductase chain 1 OS=Rattus norvegicus OX=10116 GN=Mt-nd1 PE=3 SV=1
172	223	tr|D2E6L7|D2E6L7_RAT	88.81	6	6	498640	1	1	1	Y	36062	NADH-ubiquinone oxidoreductase chain 1 OS=Rattus norvegicus OX=10116 GN=ND1 PE=3 SV=1
87	99	tr|G3V6P2|G3V6P2_RAT	85.05	8	8	1347300	3	3	3	N	48899	Dihydrolipoamide S-succinyltransferase (E2 component of 2-oxo-glutarate complex), isoform CRA_a OS=Rattus norvegicus OX=10116 GN=Dlst PE=1 SV=1
104	182	tr|Q06Q97|Q06Q97_RAT	84	10	10	1461900	2	2	3	Y	38485	NADH-ubiquinone oxidoreductase chain 2 OS=Rattus norvegicus OX=10116 GN=ND2 PE=3 SV=1
104	183	tr|A0A0A1G491|A0A0A1G491_RAT	84	10	10	1461900	2	2	3	Y	38542	NADH-ubiquinone oxidoreductase chain 2 OS=Rattus norvegicus OX=10116 GN=ND2 PE=3 SV=1
104	184	tr|Q5UAJ8|Q5UAJ8_RAT	84	10	10	1461900	2	2	3	Y	38455	NADH-ubiquinone oxidoreductase chain 2 OS=Rattus norvegicus OX=10116 GN=ND2 PE=3 SV=1
77	134	tr|A0A0G2JSH5|A0A0G2JSH5_RAT	83.59	6	6	3129800	4	4	4	Y	68759	Serum albumin OS=Rattus norvegicus OX=10116 GN=Alb PE=1 SV=1
155	193	Q5XI78|ODO1_RAT	82.53	3	3	205310	1	1	1	N	116296	2-oxoglutarate dehydrogenase, mitochondrial OS=Rattus norvegicus OX=10116 GN=Ogdh PE=1 SV=1
89	137	Q9WVK7|HCDH_RAT	82.41	13	13	2132000	3	3	3	N	34448	Hydroxyacyl-coenzyme A dehydrogenase, mitochondrial OS=Rattus norvegicus OX=10116 GN=Hadh PE=2 SV=1
109	141	Q924S5|LONM_RAT	79.52	5	5	1406100	2	2	2	N	105792	Lon protease homolog, mitochondrial OS=Rattus norvegicus OX=10116 GN=Lonp1 PE=2 SV=1
251	251	tr|A0A0G2K9B4|A0A0G2K9B4_RAT	79.02	5	5	601910	1	1	1	N	33652	Mitochondrial ribosomal protein L15 OS=Rattus norvegicus OX=10116 GN=Mrpl15 PE=1 SV=1
96	169	tr|A0A0G2JZJ9|A0A0G2JZJ9_RAT	78.9	22	22	2363100	2	2	3	N	12730	Uncharacterized protein OS=Rattus norvegicus OX=10116 PE=4 SV=1
96	175	tr|B5DEL8|B5DEL8_RAT	78.9	22	22	2363100	2	2	3	N	12700	NADH dehydrogenase (Ubiquinone) Fe-S protein 5 OS=Rattus norvegicus OX=10116 GN=Ndufs5 PE=1 SV=1
95	166	tr|D4A4A9|D4A4A9_RAT	78.66	11	11	446310	2	2	3	N	33633	Mitochondrial ribosomal protein L19 OS=Rattus norvegicus OX=10116 GN=Mrpl19 PE=1 SV=1
97	107	P0C2C0|RM22_RAT	77.28	18	18	1458500	3	3	3	N	24039	39S ribosomal protein L22, mitochondrial OS=Rattus norvegicus OX=10116 GN=Mrpl22 PE=1 SV=1
97	108	tr|A0A0H2UHT3|A0A0H2UHT3_RAT	77.28	17	17	1458500	3	3	3	N	25865	39S ribosomal protein L22, mitochondrial OS=Rattus norvegicus OX=10116 GN=Mrpl22 PE=1 SV=1
204	227	tr|F1LZW6|F1LZW6_RAT	76.89	5	5	132240	1	1	1	N	54099	Solute carrier family 25 member 13 OS=Rattus norvegicus OX=10116 GN=Slc25a13 PE=1 SV=2
88	114	P19511|AT5F1_RAT	74.76	13	13	2820800	3	3	3	N	28869	ATP synthase F(0) complex subunit B1, mitochondrial OS=Rattus norvegicus OX=10116 GN=Atp5pb PE=1 SV=1
117	192	tr|D4A7L4|D4A7L4_RAT	74.47	21	21	6584700	2	2	2	Y	17634	NADH dehydrogenase (Ubiquinone) 1 beta subcomplex, 11 (Predicted) OS=Rattus norvegicus OX=10116 GN=Ndufb11 PE=1 SV=1
98	117	tr|G3V734|G3V734_RAT	74.19	10	10	2722200	3	3	3	N	36133	2,4-dienoyl CoA reductase 1, mitochondrial, isoform CRA_a OS=Rattus norvegicus OX=10116 GN=Decr1 PE=1 SV=1
98	118	Q64591|DECR_RAT	74.19	10	10	2722200	3	3	3	N	36133	2,4-dienoyl-CoA reductase, mitochondrial OS=Rattus norvegicus OX=10116 GN=Decr1 PE=1 SV=2
255	260	tr|D3ZUX5|D3ZUX5_RAT	73.61	5	5	921530	1	1	1	N	26435	MICOS complex subunit OS=Rattus norvegicus OX=10116 GN=Chchd3 PE=1 SV=1
200	214	Q5I0K8|RT07_RAT	73.36	7	7	436930	1	1	1	N	28197	28S ribosomal protein S7, mitochondrial OS=Rattus norvegicus OX=10116 GN=Mrps7 PE=2 SV=2
130	188	Q06647|ATPO_RAT	72.56	12	12	1102900	2	2	2	N	23398	ATP synthase subunit O, mitochondrial OS=Rattus norvegicus OX=10116 GN=Atp5po PE=1 SV=1
79	103	P04762|CATA_RAT	71.62	9	9	676110	4	4	4	N	59757	Catalase OS=Rattus norvegicus OX=10116 GN=Cat PE=1 SV=3
196	204	P31399|ATP5H_RAT	71.56	8	8	351130	1	1	1	N	18763	ATP synthase subunit d, mitochondrial OS=Rattus norvegicus OX=10116 GN=Atp5pd PE=1 SV=3
131	189	tr|B2RYS2|B2RYS2_RAT	71.48	14	14	2586100	2	2	2	N	13559	Cytochrome b-c1 complex subunit 7 OS=Rattus norvegicus OX=10116 GN=Uqcrb PE=1 SV=1
205	229	tr|A0A0G2KA48|A0A0G2KA48_RAT	70.95	3	3	265100	1	1	1	N	46686	39S ribosomal protein L37, mitochondrial OS=Rattus norvegicus OX=10116 GN=Mrpl37 PE=1 SV=1
205	230	Q6AXT0|RM37_RAT	70.95	3	3	265100	1	1	1	N	48366	39S ribosomal protein L37, mitochondrial OS=Rattus norvegicus OX=10116 GN=Mrpl37 PE=2 SV=1
124	173	Q63750|RM23_RAT	69.92	36	36	0	2	2	2	N	17050	39S ribosomal protein L23, mitochondrial OS=Rattus norvegicus OX=10116 GN=Mrpl23 PE=2 SV=1
100	132	tr|D4A3E8|D4A3E8_RAT	68.54	7	7	167400	3	3	3	N	47648	Mitochondrial ribosomal protein S27 OS=Rattus norvegicus OX=10116 GN=Mrps27 PE=1 SV=1
129	187	tr|D3ZDP2|D3ZDP2_RAT	68.21	11	11	441290	2	2	2	N	23470	Mitochondrial ribosomal protein L58 OS=Rattus norvegicus OX=10116 GN=Mrpl58 PE=1 SV=1
125	174	tr|D4A104|D4A104_RAT	67.61	8	8	1016800	2	2	2	N	35440	Mitochondrial ribosomal protein L45 OS=Rattus norvegicus OX=10116 GN=Mrpl45 PE=1 SV=1
253	253	tr|D3ZTW8|D3ZTW8_RAT	67.38	10	10	391700	1	1	1	N	15823	Mitochondrial ribosomal protein L27 OS=Rattus norvegicus OX=10116 GN=Mrpl27 PE=1 SV=2
252	252	tr|D3ZLT1|D3ZLT1_RAT	67.37	12	12	967070	1	1	1	Y	16568	NADH dehydrogenase (Ubiquinone) 1 beta subcomplex, 7 (Predicted) OS=Rattus norvegicus OX=10116 GN=Ndufb7 PE=1 SV=1
254	254	tr|Q7H115|Q7H115_RAT	66.73	5	5	650340	1	1	1	N	29871	Cytochrome c oxidase subunit 3 OS=Rattus norvegicus OX=10116 GN=Mt-co3 PE=3 SV=1
254	255	tr|I6V4L9|I6V4L9_RAT	66.73	5	5	650340	1	1	1	N	29844	Cytochrome c oxidase subunit 3 OS=Rattus norvegicus OX=10116 GN=COX3 PE=3 SV=1
254	256	tr|Q8M7G4|Q8M7G4_RAT	66.73	5	5	650340	1	1	1	N	29861	Cytochrome c oxidase subunit 3 OS=Rattus norvegicus OX=10116 PE=2 SV=1
254	257	tr|A0A096XKT2|A0A096XKT2_RAT	66.73	5	5	650340	1	1	1	N	29901	Cytochrome c oxidase subunit 3 OS=Rattus norvegicus OX=10116 GN=COX3 PE=3 SV=1
254	258	P05505|COX3_RAT	66.73	5	5	650340	1	1	1	N	29871	Cytochrome c oxidase subunit 3 OS=Rattus norvegicus OX=10116 GN=Mtco3 PE=1 SV=5
254	259	tr|Q8SEZ2|Q8SEZ2_RAT	66.73	5	5	650340	1	1	1	N	29870	Cytochrome c oxidase subunit 3 (Fragment) OS=Rattus norvegicus OX=10116 GN=COIII PE=3 SV=1
207	244	Q66H15|RMD3_RAT	66.57	5	5	155180	1	1	1	N	52312	Regulator of microtubule dynamics protein 3 OS=Rattus norvegicus OX=10116 GN=Rmdn3 PE=1 SV=1
126	176	P08011|MGST1_RAT	63.47	17	17	1226700	2	2	2	N	17472	Microsomal glutathione S-transferase 1 OS=Rattus norvegicus OX=10116 GN=Mgst1 PE=1 SV=3
126	177	tr|B6DYQ4|B6DYQ4_RAT	63.47	17	17	1226700	2	2	2	N	17472	Microsomal glutathione S-transferase OS=Rattus norvegicus OX=10116 GN=Mgst1 PE=2 SV=1
116	160	Q8VHF5|CISY_RAT	63.15	5	5	1411300	2	2	2	N	51867	Citrate synthase, mitochondrial OS=Rattus norvegicus OX=10116 GN=Cs PE=1 SV=1
116	161	tr|G3V936|G3V936_RAT	63.15	5	5	1411300	2	2	2	N	51831	Citrate synthase OS=Rattus norvegicus OX=10116 GN=Cs PE=1 SV=1
256	261	P18665|RM03_RAT	62.84	6	6	872600	1	1	1	N	38253	39S ribosomal protein L3, mitochondrial OS=Rattus norvegicus OX=10116 GN=Mrpl3 PE=2 SV=1
256	262	tr|G3V7P3|G3V7P3_RAT	62.84	6	6	872600	1	1	1	N	38492	39S ribosomal protein L3, mitochondrial OS=Rattus norvegicus OX=10116 GN=Mrpl3 PE=1 SV=1
118	198	tr|A0A0G2K1F9|A0A0G2K1F9_RAT	62.41	3	3	750110	2	2	2	N	67320	Glycerol-3-phosphate dehydrogenase, mitochondrial OS=Rattus norvegicus OX=10116 GN=Gpd2 PE=1 SV=1
118	199	tr|A0A0G2K0Z7|A0A0G2K0Z7_RAT	62.41	3	3	750110	2	2	2	N	69062	Glycerol-3-phosphate dehydrogenase, mitochondrial OS=Rattus norvegicus OX=10116 GN=Gpd2 PE=1 SV=1
118	200	P35571|GPDM_RAT	62.41	3	3	750110	2	2	2	N	80973	Glycerol-3-phosphate dehydrogenase, mitochondrial OS=Rattus norvegicus OX=10116 GN=Gpd2 PE=1 SV=1
257	263	tr|B0BN02|B0BN02_RAT	61.12	4	4	1602800	1	1	1	N	48444	Metaxin OS=Rattus norvegicus OX=10116 GN=Mtx1 PE=1 SV=1
127	180	Q5PQN9|RM38_RAT	59.74	4	4	433170	2	2	2	N	44838	39S ribosomal protein L38, mitochondrial OS=Rattus norvegicus OX=10116 GN=Mrpl38 PE=2 SV=2
115	158	P11240|COX5A_RAT	59.57	10	10	1140500	2	2	2	N	16130	Cytochrome c oxidase subunit 5A, mitochondrial OS=Rattus norvegicus OX=10116 GN=Cox5a PE=1 SV=1
258	264	B1WC61|ACAD9_RAT	57.09	4	4	247330	1	1	1	N	68843	Complex I assembly factor ACAD9, mitochondrial OS=Rattus norvegicus OX=10116 GN=Acad9 PE=1 SV=1
259	265	tr|Q8SEZ1|Q8SEZ1_RAT	56.6	13	13	487810	1	1	1	Y	13087	NADH-ubiquinone oxidoreductase chain 3 OS=Rattus norvegicus OX=10116 GN=Mt-nd3 PE=2 SV=1
259	266	P05506|NU3M_RAT	56.6	13	13	487810	1	1	1	Y	13087	NADH-ubiquinone oxidoreductase chain 3 OS=Rattus norvegicus OX=10116 GN=Mtnd3 PE=3 SV=3
259	267	tr|A0A0A1FZ38|A0A0A1FZ38_RAT	56.6	13	13	487810	1	1	1	Y	13071	NADH-ubiquinone oxidoreductase chain 3 OS=Rattus norvegicus OX=10116 GN=ND3 PE=3 SV=1
259	268	tr|Q06QG9|Q06QG9_RAT	56.6	13	13	487810	1	1	1	Y	13075	NADH-ubiquinone oxidoreductase chain 3 OS=Rattus norvegicus OX=10116 GN=ND3 PE=3 SV=1
260	269	tr|A0A0G2K642|A0A0G2K642_RAT	55.93	4	4	401380	1	1	1	N	41754	3-ketoacyl-CoA thiolase, mitochondrial OS=Rattus norvegicus OX=10116 GN=Acaa2 PE=1 SV=1
260	270	P13437|THIM_RAT	55.93	4	4	401380	1	1	1	N	41871	3-ketoacyl-CoA thiolase, mitochondrial OS=Rattus norvegicus OX=10116 GN=Acaa2 PE=1 SV=1
260	271	tr|G3V9U2|G3V9U2_RAT	55.93	4	4	401380	1	1	1	N	41885	3-ketoacyl-CoA thiolase, mitochondrial OS=Rattus norvegicus OX=10116 GN=Acaa2 PE=1 SV=3
128	185	tr|D3ZZ21|D3ZZ21_RAT	55.56	12	12	1374600	2	2	2	N	15638	NADH dehydrogenase (Ubiquinone) 1 beta subcomplex, 6 (Predicted) OS=Rattus norvegicus OX=10116 GN=Ndufb6 PE=1 SV=1
206	243	tr|G3V644|G3V644_RAT	53.41	6	6	685530	1	1	1	N	49300	NADH dehydrogenase (Ubiquinone) flavoprotein 3-like, isoform CRA_a OS=Rattus norvegicus OX=10116 GN=Ndufv3 PE=1 SV=1
206	272	tr|O54755|O54755_RAT	53.41	6	6	685530	1	1	1	N	49312	MIPP65 OS=Rattus norvegicus OX=10116 GN=Ndufv3 PE=2 SV=1
261	273	Q7TT47|SPG7_RAT	52.61	1	1	0	1	1	1	N	86103	Paraplegin OS=Rattus norvegicus OX=10116 GN=Spg7 PE=2 SV=2
136	274	P11951|CX6C2_RAT	51.17	12	12	299720	1	1	2	N	8455	Cytochrome c oxidase subunit 6C-2 OS=Rattus norvegicus OX=10116 GN=Cox6c2 PE=1 SV=3
169	179	tr|Q5XFW4|Q5XFW4_RAT	51	6	6	457390	1	1	1	N	20541	Mitochondrial ribosomal protein L13 OS=Rattus norvegicus OX=10116 GN=Mrpl13 PE=1 SV=1
110	142	tr|B5DEY1|B5DEY1_RAT	50.73	3	3	396480	2	1	2	N	84183	Afg3l1 protein (Fragment) OS=Rattus norvegicus OX=10116 GN=Afg3l1 PE=2 SV=1
110	143	tr|D3ZZ20|D3ZZ20_RAT	50.73	3	3	396480	2	1	2	N	87203	AFG3(ATPase family gene 3)-like 1 (S. cerevisiae) OS=Rattus norvegicus OX=10116 GN=Afg3l1 PE=1 SV=2
132	191	tr|B2RZD6|B2RZD6_RAT	46.83	22	22	265170	2	2	2	N	9327	NDUFA4, mitochondrial complex-associated OS=Rattus norvegicus OX=10116 GN=Ndufa4 PE=1 SV=1
262	275	B0BN56|RT31_RAT	44.82	7	7	531390	1	1	1	N	43962	28S ribosomal protein S31, mitochondrial OS=Rattus norvegicus OX=10116 GN=Mrps31 PE=2 SV=1
198	209	P10818|CX6A1_RAT	44.23	11	11	322910	1	1	1	N	12301	Cytochrome c oxidase subunit 6A1, mitochondrial OS=Rattus norvegicus OX=10116 GN=Cox6a1 PE=1 SV=2
263	277	P0CG51|UBB_RAT	42.64	3	3	413390	1	1	1	N	34369	Polyubiquitin-B OS=Rattus norvegicus OX=10116 GN=Ubb PE=1 SV=1
199	213	tr|A0A0G2K5L2|A0A0G2K5L2_RAT	41.64	8	8	0	1	1	1	N	34662	RCG47744, isoform CRA_c OS=Rattus norvegicus OX=10116 GN=LOC100911440 PE=1 SV=1
168	167	P35434|ATPD_RAT	41.33	5	5	379080	1	1	1	N	17595	ATP synthase subunit delta, mitochondrial OS=Rattus norvegicus OX=10116 GN=Atp5f1d PE=1 SV=2
168	168	tr|G3V7Y3|G3V7Y3_RAT	41.33	5	5	379080	1	1	1	N	17563	ATP synthase subunit delta, mitochondrial OS=Rattus norvegicus OX=10116 GN=Atp5f1d PE=1 SV=1
264	278	tr|B5DFA3|B5DFA3_RAT	41.15	2	2	195130	1	1	1	N	65357	Bucs1 protein OS=Rattus norvegicus OX=10116 GN=Acsm1 PE=2 SV=1
264	279	tr|F1M1W1|F1M1W1_RAT	41.15	2	2	195130	1	1	1	N	65347	Acyl-coenzyme A synthetase ACSM2, mitochondrial OS=Rattus norvegicus OX=10116 GN=Acsm1 PE=1 SV=3
264	280	tr|A0A0G2K125|A0A0G2K125_RAT	41.15	2	2	195130	1	1	1	N	65319	Acyl-coenzyme A synthetase ACSM2, mitochondrial OS=Rattus norvegicus OX=10116 GN=Acsm1 PE=1 SV=1
264	281	tr|A0A0G2K8G2|A0A0G2K8G2_RAT	41.15	2	2	195130	1	1	1	N	70943	Acyl-coenzyme A synthetase ACSM2, mitochondrial OS=Rattus norvegicus OX=10116 GN=Acsm1 PE=1 SV=1
160	234	tr|Q06QK5|Q06QK5_RAT	40.91	2	2	5054400	1	1	1	N	68606	NADH-ubiquinone oxidoreductase chain 5 OS=Rattus norvegicus OX=10116 GN=ND5 PE=3 SV=1
160	235	P11661|NU5M_RAT	40.91	2	2	5054400	1	1	1	N	68618	NADH-ubiquinone oxidoreductase chain 5 OS=Rattus norvegicus OX=10116 GN=Mtnd5 PE=3 SV=3
160	236	tr|Q06QA1|Q06QA1_RAT	40.91	2	2	5054400	1	1	1	N	68574	NADH-ubiquinone oxidoreductase chain 5 OS=Rattus norvegicus OX=10116 GN=ND5 PE=3 SV=1
160	237	tr|Q8SEZ0|Q8SEZ0_RAT	40.91	2	2	5054400	1	1	1	N	68618	NADH-ubiquinone oxidoreductase chain 5 OS=Rattus norvegicus OX=10116 GN=Mt-nd5 PE=3 SV=1
160	238	tr|A0A096XKT9|A0A096XKT9_RAT	40.91	2	2	5054400	1	1	1	N	68584	NADH-ubiquinone oxidoreductase chain 5 OS=Rattus norvegicus OX=10116 GN=ND5 PE=3 SV=1
160	239	tr|Q06QG6|Q06QG6_RAT	40.91	2	2	5054400	1	1	1	N	68588	NADH-ubiquinone oxidoreductase chain 5 OS=Rattus norvegicus OX=10116 GN=ND5 PE=3 SV=1
160	240	tr|A7XYD5|A7XYD5_RAT	40.91	2	2	5054400	1	1	1	N	68856	NADH-ubiquinone oxidoreductase chain 5 OS=Rattus norvegicus OX=10116 GN=Nd5 PE=3 SV=1
160	241	tr|A7XYC1|A7XYC1_RAT	40.91	2	2	5054400	1	1	1	N	68841	NADH-ubiquinone oxidoreductase chain 5 OS=Rattus norvegicus OX=10116 GN=Nd5 PE=3 SV=1
160	242	tr|A0A0A1FZN8|A0A0A1FZN8_RAT	40.91	2	2	5054400	1	1	1	N	68970	NADH-ubiquinone oxidoreductase chain 5 OS=Rattus norvegicus OX=10116 GN=ND5 PE=3 SV=1
265	282	P19804|NDKB_RAT	40.82	8	8	265680	1	1	1	N	17283	Nucleoside diphosphate kinase B OS=Rattus norvegicus OX=10116 GN=Nme2 PE=1 SV=1
265	283	Q05982|NDKA_RAT	40.82	8	8	265680	1	1	1	N	17193	Nucleoside diphosphate kinase A OS=Rattus norvegicus OX=10116 GN=Nme1 PE=1 SV=1
203	226	tr|D3ZYT2|D3ZYT2_RAT	39.85	3	3	602050	1	1	1	N	48136	Mitochondrial ribosomal protein S5 OS=Rattus norvegicus OX=10116 GN=Mrps5 PE=1 SV=1
105	246	O54902|NRAM2_RAT	39.68	3	3	1023400	2	1	3	N	62277	Natural resistance-associated macrophage protein 2 OS=Rattus norvegicus OX=10116 GN=Slc11a2 PE=1 SV=1
201	215	tr|D3ZXF8|D3ZXF8_RAT	39.63	7	7	369480	1	1	1	N	17575	Mitochondrial ribosomal protein L43 OS=Rattus norvegicus OX=10116 GN=Mrpl43 PE=1 SV=3
112	210	tr|D3ZGM1|D3ZGM1_RAT	39.28	3	3	535970	2	2	2	N	77891	Pentatricopeptide repeat domain 3 OS=Rattus norvegicus OX=10116 GN=Ptcd3 PE=1 SV=1
112	211	tr|A0A0G2JU15|A0A0G2JU15_RAT	39.28	3	3	535970	2	2	2	N	84557	Pentatricopeptide repeat domain 3 OS=Rattus norvegicus OX=10116 GN=Ptcd3 PE=1 SV=1
106	162	tr|D3Z900|D3Z900_RAT	39.12	5	5	981390	2	2	2	N	38239	Mitochondrial amidoxime reducing component 2 OS=Rattus norvegicus OX=10116 GN=Marc2 PE=1 SV=2
106	163	O88994|MARC2_RAT	39.12	5	5	981390	2	2	2	N	38249	Mitochondrial amidoxime reducing component 2 OS=Rattus norvegicus OX=10116 GN=Marc2 PE=2 SV=1
106	164	tr|M0R6N2|M0R6N2_RAT	39.12	5	5	981390	2	2	2	N	38175	MOSC domain-containing protein 2, mitochondrial-like OS=Rattus norvegicus OX=10116 GN=LOC100910481 PE=1 SV=1
266	284	tr|A0A0G2JUQ9|A0A0G2JUQ9_RAT	38.87	34	34	0	1	1	1	N	10511	Mitochondrial ribosomal protein S18B (Fragment) OS=Rattus norvegicus OX=10116 GN=Mrps18b PE=1 SV=1
266	285	tr|A0A0G2JXL3|A0A0G2JXL3_RAT	38.87	21	21	0	1	1	1	N	17268	Mitochondrial ribosomal protein S18B (Fragment) OS=Rattus norvegicus OX=10116 GN=Mrps18b PE=1 SV=4
266	286	tr|Q6MG10|Q6MG10_RAT	38.87	12	12	0	1	1	1	N	28682	Mitochondrial ribosomal protein S18B OS=Rattus norvegicus OX=10116 GN=Mrps18b PE=2 SV=1
266	287	tr|F6Q5K7|F6Q5K7_RAT	38.87	12	12	0	1	1	1	N	29159	Mitochondrial ribosomal protein S18B OS=Rattus norvegicus OX=10116 GN=Mrps18b PE=1 SV=1
268	289	P80433|COX8A_RAT	38.82	10	10	263390	1	1	1	N	7672	Cytochrome c oxidase subunit 8A, mitochondrial OS=Rattus norvegicus OX=10116 GN=Cox8a PE=1 SV=3
267	288	tr|B2RZ57|B2RZ57_RAT	38.01	5	5	353210	1	1	1	N	20651	Mitochondrial ribosomal protein L18 OS=Rattus norvegicus OX=10116 GN=Mrpl18 PE=1 SV=1
271	293	Q641X9|RM09_RAT	37.8	3	3	279950	1	1	1	N	30076	39S ribosomal protein L9, mitochondrial OS=Rattus norvegicus OX=10116 GN=Mrpl9 PE=2 SV=1
269	290	tr|M0RAM5|M0RAM5_RAT	37.11	6	6	457190	1	1	1	N	22155	Glutathione peroxidase OS=Rattus norvegicus OX=10116 GN=Gpx1 PE=1 SV=1
269	291	P04041|GPX1_RAT	37.11	6	6	457190	1	1	1	N	22305	Glutathione peroxidase 1 OS=Rattus norvegicus OX=10116 GN=Gpx1 PE=1 SV=4
270	292	Q66H47|RM24_RAT	36.78	4	4	366240	1	1	1	N	25001	39S ribosomal protein L24, mitochondrial OS=Rattus norvegicus OX=10116 GN=Mrpl24 PE=2 SV=1
108	231	P70705|ATP7A_RAT	35.7	2	2	1513600	2	2	2	Y	162092	Copper-transporting ATPase 1 OS=Rattus norvegicus OX=10116 GN=Atp7a PE=1 SV=1
202	224	Q6AYC2|IRGM_RAT	35.1	2	2	526220	1	1	1	N	46338	Immunity-related GTPase family M protein OS=Rattus norvegicus OX=10116 GN=Irgm PE=2 SV=1
121	365	tr|G3V8G1|G3V8G1_RAT	34.64	1	1	2557800	2	1	2	Y	137113	ATP/GTP binding protein 1 (Predicted), isoform CRA_a OS=Rattus norvegicus OX=10116 GN=Agtpbp1 PE=4 SV=1
272	296	P19527|NFL_RAT	34.55	3	3	311400	1	1	1	Y	61335	Neurofilament light polypeptide OS=Rattus norvegicus OX=10116 GN=Nefl PE=1 SV=3
273	297	tr|A9UMW2|A9UMW2_RAT	33.76	13	13	552160	1	1	1	N	9255	Ndufa3 protein (Fragment) OS=Rattus norvegicus OX=10116 GN=Ndufa3 PE=2 SV=1
273	298	tr|M0RB63|M0RB63_RAT	33.76	13	13	552160	1	1	1	N	9372	RCG63041 OS=Rattus norvegicus OX=10116 GN=LOC684509 PE=4 SV=1
273	299	tr|A0A0G2KAA3|A0A0G2KAA3_RAT	33.76	12	12	552160	1	1	1	N	10170	NADH:ubiquinone oxidoreductase subunit A3 OS=Rattus norvegicus OX=10116 GN=Ndufa3 PE=1 SV=1
275	302	tr|D4A4P3|D4A4P3_RAT	32.64	8	8	641070	1	1	1	N	11267	NADH:ubiquinone oxidoreductase subunit B3 OS=Rattus norvegicus OX=10116 GN=Ndufb3 PE=1 SV=1
274	301	tr|B2RZ24|B2RZ24_RAT	32.64	2	2	763930	1	1	1	N	47388	Succinate-CoA ligase subunit beta (Fragment) OS=Rattus norvegicus OX=10116 GN=Sucla2 PE=2 SV=1
274	303	tr|F1LM47|F1LM47_RAT	32.64	2	2	763930	1	1	1	N	50306	Succinate--CoA ligase [ADP-forming] subunit beta, mitochondrial OS=Rattus norvegicus OX=10116 GN=Sucla2 PE=1 SV=1
142	468	Q63704|CPT1B_RAT	30.76	1	1	0	1	1	2	N	88217	Carnitine O-palmitoyltransferase 1, muscle isoform OS=Rattus norvegicus OX=10116 GN=Cpt1b PE=1 SV=1
142	489	F1LN46|CPT1C_RAT	30.76	1	1	0	1	1	2	N	90170	Carnitine O-palmitoyltransferase 1, brain isoform OS=Rattus norvegicus OX=10116 GN=Cpt1c PE=1 SV=1
142	533	tr|M0RAQ6|M0RAQ6_RAT	30.76	1	1	0	1	1	2	N	99557	Hexokinase-1 OS=Rattus norvegicus OX=10116 GN=Hk1 PE=1 SV=2
142	549	P05708|HXK1_RAT	30.76	1	1	0	1	1	2	N	102408	Hexokinase-1 OS=Rattus norvegicus OX=10116 GN=Hk1 PE=1 SV=4
159	233	Q5U2U0|CLPX_RAT	30.15	2	2	0	1	1	1	N	69208	ATP-dependent Clp protease ATP-binding subunit clpX-like, mitochondrial OS=Rattus norvegicus OX=10116 GN=Clpx PE=2 SV=1
211	310	tr|Q5BJZ3|Q5BJZ3_RAT	29.97	1	1	715240	1	1	1	Y	113869	Nicotinamide nucleotide transhydrogenase OS=Rattus norvegicus OX=10116 GN=Nnt PE=1 SV=1
140	366	P32089|TXTP_RAT	29.18	4	4	307380	2	1	2	N	33835	Tricarboxylate transport protein, mitochondrial OS=Rattus norvegicus OX=10116 GN=Slc25a1 PE=1 SV=1
277	320	tr|D3ZYL4|D3ZYL4_RAT	26.81	7	7	0	1	1	1	N	18319	Mitochondrial ribosomal protein L50 OS=Rattus norvegicus OX=10116 GN=Mrpl50 PE=1 SV=1
212	311	tr|D3ZK81|D3ZK81_RAT	26.75	4	4	0	1	1	1	Y	34694	Mitochondrial rRNA methyltransferase 1 OS=Rattus norvegicus OX=10116 GN=Mrm1 PE=4 SV=1
278	328	Q5M9G9|FAKD4_RAT	25.59	2	2	287680	1	1	1	Y	71181	FAST kinase domain-containing protein 4 OS=Rattus norvegicus OX=10116 GN=Tbrg4 PE=2 SV=1
279	330	tr|D3ZXQ6|D3ZXQ6_RAT	25.26	3	3	0	1	1	1	N	46897	LETM1 domain-containing protein LETM2, mitochondrial OS=Rattus norvegicus OX=10116 GN=Letm2 PE=4 SV=3
279	331	Q5PQQ5|LETM2_RAT	25.26	3	3	0	1	1	1	N	52524	LETM1 domain-containing protein LETM2, mitochondrial OS=Rattus norvegicus OX=10116 GN=Letm2 PE=2 SV=1
279	332	tr|F1LP77|F1LP77_RAT	25.26	3	3	0	1	1	1	N	52501	LETM1 domain-containing protein LETM2, mitochondrial OS=Rattus norvegicus OX=10116 GN=Letm2 PE=4 SV=3
143	416	tr|F1M953|F1M953_RAT	24.52	4	4	2410700	2	2	2	Y	73745	Stress-70 protein, mitochondrial OS=Rattus norvegicus OX=10116 GN=Hspa9 PE=1 SV=1
143	417	P48721|GRP75_RAT	24.52	4	4	2410700	2	2	2	Y	73858	Stress-70 protein, mitochondrial OS=Rattus norvegicus OX=10116 GN=Hspa9 PE=1 SV=3
162	321	tr|F1LNF0|F1LNF0_RAT	24.48	0	0	851370	1	1	1	Y	228912	Myosin heavy chain 14 OS=Rattus norvegicus OX=10116 GN=Myh14 PE=1 SV=1
284	339	tr|G3V783|G3V783_RAT	2020-05-24	1	1	505150	1	1	1	N	60778	Receptor-interacting serine/threonine-protein kinase 2 OS=Rattus norvegicus OX=10116 GN=Ripk2 PE=1 SV=1
286	346	tr|A0A0G2JU55|A0A0G2JU55_RAT	2020-02-24	4	4	442780	1	1	1	N	18468	Uncharacterized protein OS=Rattus norvegicus OX=10116 PE=3 SV=1
280	334	P0DMW0|HS71A_RAT	23.91	2	2	301130	1	1	1	Y	70185	Heat shock 70 kDa protein 1A OS=Rattus norvegicus OX=10116 GN=Hspa1a PE=2 SV=1
280	335	P0DMW1|HS71B_RAT	23.91	2	2	301130	1	1	1	Y	70185	Heat shock 70 kDa protein 1B OS=Rattus norvegicus OX=10116 GN=Hspa1b PE=2 SV=1
281	336	Q5FVP8|DGAT2_RAT	23.89	3	3	486090	1	1	1	Y	43795	Diacylglycerol O-acyltransferase 2 OS=Rattus norvegicus OX=10116 GN=Dgat2 PE=2 SV=1
210	308	P03957|MMP3_RAT	23.83	3	3	0	1	1	1	Y	53428	Stromelysin-1 OS=Rattus norvegicus OX=10116 GN=Mmp3 PE=1 SV=1
120	349	tr|A0A0G2K261|A0A0G2K261_RAT	23.53	1	1	443580	1	1	2	N	112677	Isoleucyl-tRNA synthetase 2, mitochondrial OS=Rattus norvegicus OX=10116 GN=Iars2 PE=1 SV=1
287	363	tr|D4A5E7|D4A5E7_RAT	22.94	2	2	1124800	1	1	1	Y	80721	Inhibitor of kappaB kinase epsilon (Predicted) OS=Rattus norvegicus OX=10116 GN=Ikbke PE=1 SV=1
179	358	P51111|HD_RAT	22.35	0	0	386830	1	1	1	Y	343761	Huntingtin OS=Rattus norvegicus OX=10116 GN=Htt PE=1 SV=1
179	359	tr|G3V9P7|G3V9P7_RAT	22.35	0	0	386830	1	1	1	Y	344745	Huntingtin OS=Rattus norvegicus OX=10116 GN=Htt PE=1 SV=1
180	373	Q641Y8|DDX1_RAT	22.18	1	1	316030	1	1	1	N	82497	ATP-dependent RNA helicase DDX1 OS=Rattus norvegicus OX=10116 GN=Ddx1 PE=1 SV=1
290	372	tr|F1LNJ1|F1LNJ1_RAT	2020-02-22	1	1	526780	1	1	1	Y	284829	Leucine-rich repeat kinase 2 OS=Rattus norvegicus OX=10116 GN=Lrrk2 PE=1 SV=3
306	412	P48037|ANXA6_RAT	21.77	1	1	193960	1	1	1	N	75754	Annexin A6 OS=Rattus norvegicus OX=10116 GN=Anxa6 PE=1 SV=2
306	413	tr|Q6IMZ3|Q6IMZ3_RAT	21.77	1	1	193960	1	1	1	N	75756	Annexin OS=Rattus norvegicus OX=10116 GN=Anxa6 PE=1 SV=1
122	377	tr|G3V827|G3V827_RAT	21.66	2	2	1387700	1	1	2	N	51581	Cysteine conjugate-beta lyase 1, isoform CRA_a OS=Rattus norvegicus OX=10116 GN=Kyat1 PE=1 SV=1
122	378	Q08415|KAT1_RAT	21.66	2	2	1387700	1	1	2	N	51653	Kynurenine--oxoglutarate transaminase 1, mitochondrial OS=Rattus norvegicus OX=10116 GN=Kyat1 PE=1 SV=1
304	405	P29476|NOS1_RAT	21.59	0	0	406760	1	1	1	Y	160559	Nitric oxide synthase, brain OS=Rattus norvegicus OX=10116 GN=Nos1 PE=1 SV=1
304	406	tr|D3ZEW7|D3ZEW7_RAT	21.59	0	0	406760	1	1	1	Y	164329	Nitric oxide synthase, brain OS=Rattus norvegicus OX=10116 GN=Nos1 PE=1 SV=2
292	380	P63088|PP1G_RAT	21.34	5	5	463420	1	1	1	Y	36984	Serine/threonine-protein phosphatase PP1-gamma catalytic subunit OS=Rattus norvegicus OX=10116 GN=Ppp1cc PE=1 SV=1
292	381	tr|Q6AYZ4|Q6AYZ4_RAT	21.34	4	4	463420	1	1	1	Y	38504	Serine/threonine-protein phosphatase OS=Rattus norvegicus OX=10116 GN=Ppp1cc PE=2 SV=1
295	384	tr|D4A7Q3|D4A7Q3_RAT	21.23	8	8	6737900	1	1	1	N	11813	RCG43539, isoform CRA_a OS=Rattus norvegicus OX=10116 GN=Sdhaf4 PE=1 SV=2
215	348	tr|B2GUZ6|B2GUZ6_RAT	21.21	2	2	810750	1	1	1	Y	43606	Reticulon 4-interacting protein 1 OS=Rattus norvegicus OX=10116 GN=Rtn4ip1 PE=1 SV=1
297	389	tr|F1LVW9|F1LVW9_RAT	20.97	2	2	1946800	1	1	1	Y	64260	5-aminolevulinate synthase OS=Rattus norvegicus OX=10116 GN=Alas2 PE=3 SV=3
297	390	Q63147|HEM0_RAT	20.97	2	2	1946800	1	1	1	Y	64842	5-aminolevulinate synthase, erythroid-specific, mitochondrial OS=Rattus norvegicus OX=10116 GN=Alas2 PE=1 SV=1
297	391	tr|Q642C1|Q642C1_RAT	20.97	2	2	1946800	1	1	1	Y	64870	5-aminolevulinate synthase OS=Rattus norvegicus OX=10116 GN=Alas2 PE=2 SV=1
178	354	tr|B5DFK5|B5DFK5_RAT	20.52	1	1	4349500	1	1	1	Y	119424	Hip1r protein OS=Rattus norvegicus OX=10116 GN=Hip1r PE=2 SV=1
178	355	tr|F1LML7|F1LML7_RAT	20.52	1	1	4349500	1	1	1	Y	119553	Huntingtin-interacting protein 1-related OS=Rattus norvegicus OX=10116 GN=Hip1r PE=1 SV=1
178	356	tr|Q99PW9|Q99PW9_RAT	20.52	1	1	4349500	1	1	1	Y	120572	Huntingtin interacting protein 1 related (Fragment) OS=Rattus norvegicus OX=10116 GN=Hip1r PE=2 SV=1
303	403	tr|D4A676|D4A676_RAT	20.39	4	4	462420	1	1	1	N	24898	GrpE protein homolog OS=Rattus norvegicus OX=10116 GN=Grpel2 PE=3 SV=1
305	409	P56574|IDHP_RAT	20.29	2	2	989050	1	1	1	Y	50967	Isocitrate dehydrogenase [NADP], mitochondrial OS=Rattus norvegicus OX=10116 GN=Idh2 PE=1 SV=2
total 300 proteins

## Sheet: RLM KCl-BM PTP I-III(2)-IV(L)
Protein Group	Protein ID	Accession	-10lgP	Coverage (%)	Coverage (%) Sample 2	IBAQ	#Peptides	#Unique	#Spec Sample 2	PTM	Avg. Mass	Description
2	13	P15999|ATPA_RAT	460.42	70	70	1415100000	75	75	245	Y	59754	ATP synthase subunit alpha, mitochondrial OS=Rattus norvegicus OX=10116 GN=Atp5f1a PE=1 SV=2
1	8	P10719|ATPB_RAT	449.64	81	81	1687800000	64	64	308	Y	56354	ATP synthase subunit beta, mitochondrial OS=Rattus norvegicus OX=10116 GN=Atp5f1b PE=1 SV=2
1	9	tr|G3V6D3|G3V6D3_RAT	449.64	81	81	1687800000	64	64	308	Y	56345	ATP synthase subunit beta OS=Rattus norvegicus OX=10116 GN=Atp5f1b PE=1 SV=1
6	3	P07756|CPSM_RAT	355.54	32	32	106500000	37	37	47	Y	164579	Carbamoyl-phosphate synthase [ammonia], mitochondrial OS=Rattus norvegicus OX=10116 GN=Cps1 PE=1 SV=1
8	10	P22791|HMCS2_RAT	330.14	44	44	87135000	27	27	32	Y	56912	Hydroxymethylglutaryl-CoA synthase, mitochondrial OS=Rattus norvegicus OX=10116 GN=Hmgcs2 PE=1 SV=1
8	11	tr|Q68G44|Q68G44_RAT	330.14	44	44	87135000	27	27	32	Y	56886	3-hydroxy-3-methylglutaryl coenzyme A synthase OS=Rattus norvegicus OX=10116 GN=Hmgcs2 PE=1 SV=1
16	2	P10860|DHE3_RAT	319.64	36	36	61338000	19	19	24	Y	61416	Glutamate dehydrogenase 1, mitochondrial OS=Rattus norvegicus OX=10116 GN=Glud1 PE=1 SV=2
10	5	Q64428|ECHA_RAT	315.18	36	36	36389000	26	25	30	Y	82665	Trifunctional enzyme subunit alpha, mitochondrial OS=Rattus norvegicus OX=10116 GN=Hadha PE=1 SV=2
5	16	P67779|PHB_RAT	293.28	85	85	298710000	30	29	57	Y	29820	Prohibitin OS=Rattus norvegicus OX=10116 GN=Phb PE=1 SV=1
7	97	P35435|ATPG_RAT	283.88	65	65	16360000	19	1	37	Y	30191	ATP synthase subunit gamma, mitochondrial OS=Rattus norvegicus OX=10116 GN=Atp5f1c PE=1 SV=2
11	95	tr|Q6QI09|Q6QI09_RAT	277.73	30	30	14501000	20	2	29	Y	67721	ATP synthase subunit gamma, mitochondrial OS=Rattus norvegicus OX=10116 GN=Taf3 PE=1 SV=1
3	18	Q5XIH7|PHB2_RAT	275.42	75	75	4403900	30	1	62	Y	33312	Prohibitin-2 OS=Rattus norvegicus OX=10116 GN=Phb2 PE=1 SV=1
9	114	P19511|AT5F1_RAT	275.26	55	55	250850000	19	19	31	Y	28869	ATP synthase F(0) complex subunit B1, mitochondrial OS=Rattus norvegicus OX=10116 GN=Atp5pb PE=1 SV=1
4	19	tr|A0A0G2KB63|A0A0G2KB63_RAT	274.47	76	76	2528600	30	1	61	Y	33168	Prohibitin OS=Rattus norvegicus OX=10116 GN=Phb2 PE=1 SV=1
13	204	P31399|ATP5H_RAT	266.61	80	80	116440000	16	16	26	Y	18763	ATP synthase subunit d, mitochondrial OS=Rattus norvegicus OX=10116 GN=Atp5pd PE=1 SV=3
17	168	tr|G3V7Y3|G3V7Y3_RAT	258.55	61	61	76560000	11	11	15	Y	17563	ATP synthase subunit delta, mitochondrial OS=Rattus norvegicus OX=10116 GN=Atp5f1d PE=1 SV=1
14	6	P52873|PYC_RAT	258	20	20	34013000	20	20	25	Y	129777	Pyruvate carboxylase, mitochondrial OS=Rattus norvegicus OX=10116 GN=Pc PE=1 SV=2
14	7	tr|A0A0G2JTL5|A0A0G2JTL5_RAT	258	19	19	34013000	20	20	25	Y	140005	Pyruvate carboxylase, mitochondrial OS=Rattus norvegicus OX=10116 GN=Pc PE=1 SV=1
12	188	Q06647|ATPO_RAT	245.52	65	65	217880000	22	22	28	Y	23398	ATP synthase subunit O, mitochondrial OS=Rattus norvegicus OX=10116 GN=Atp5po PE=1 SV=1
19	12	Q66HF1|NDUS1_RAT	242.11	22	22	32472000	13	13	14	N	79412	NADH-ubiquinone oxidoreductase 75 kDa subunit, mitochondrial OS=Rattus norvegicus OX=10116 GN=Ndufs1 PE=1 SV=1
15	4	P00507|AATM_RAT	238.5	39	39	83207000	18	18	25	Y	47314	Aspartate aminotransferase, mitochondrial OS=Rattus norvegicus OX=10116 GN=Got2 PE=1 SV=2
20	28	P18163|ACSL1_RAT	213.5	15	15	10176000	11	8	12	N	78179	Long-chain-fatty-acid--CoA ligase 1 OS=Rattus norvegicus OX=10116 GN=Acsl1 PE=1 SV=1
23	48	Q9WVK3|PECR_RAT	204.95	37	37	11917000	8	8	10	Y	32433	Peroxisomal trans-2-enoyl-CoA reductase OS=Rattus norvegicus OX=10116 GN=Pecr PE=2 SV=1
23	49	tr|A0A0G2JVG4|A0A0G2JVG4_RAT	204.95	36	36	11917000	8	8	10	Y	32737	Peroxisomal trans-2-enoyl-CoA reductase OS=Rattus norvegicus OX=10116 GN=Pecr PE=1 SV=1
34	54	tr|D4A0T0|D4A0T0_RAT	200.87	28	28	6537200	5	5	5	Y	20859	NADH:ubiquinone oxidoreductase subunit B10 OS=Rattus norvegicus OX=10116 GN=Ndufb10 PE=1 SV=1
22	14	Q5BK63|NDUA9_RAT	196.06	27	27	8445600	9	9	10	Y	42559	NADH dehydrogenase [ubiquinone] 1 alpha subcomplex subunit 9, mitochondrial OS=Rattus norvegicus OX=10116 GN=Ndufa9 PE=1 SV=2
24	32	P13086|SUCA_RAT	193.77	17	17	8044300	5	5	8	Y	36148	Succinate--CoA ligase [ADP/GDP-forming] subunit alpha, mitochondrial OS=Rattus norvegicus OX=10116 GN=Suclg1 PE=2 SV=2
24	33	tr|A0A0H2UHE1|A0A0H2UHE1_RAT	193.77	16	16	8044300	5	5	8	Y	37560	Succinate--CoA ligase [ADP/GDP-forming] subunit alpha, mitochondrial OS=Rattus norvegicus OX=10116 GN=Suclg1 PE=1 SV=1
40	36	tr|D3ZG43|D3ZG43_RAT	185.13	21	21	14115000	4	4	4	N	30226	NADH dehydrogenase (Ubiquinone) Fe-S protein 3 (Predicted), isoform CRA_c OS=Rattus norvegicus OX=10116 GN=Ndufs3 PE=1 SV=1
21	31	Q60587|ECHB_RAT	176.17	22	22	13498000	9	9	11	Y	51414	Trifunctional enzyme subunit beta, mitochondrial OS=Rattus norvegicus OX=10116 GN=Hadhb PE=1 SV=1
37	47	P0C2X9|AL4A1_RAT	171.46	9	9	3731900	4	4	4	N	61869	Delta-1-pyrroline-5-carboxylate dehydrogenase, mitochondrial OS=Rattus norvegicus OX=10116 GN=Aldh4a1 PE=1 SV=1
27	55	P24329|THTR_RAT	169.31	23	23	7435600	5	5	6	N	33407	Thiosulfate sulfurtransferase OS=Rattus norvegicus OX=10116 GN=Tst PE=1 SV=3
44	93	tr|D4A565|D4A565_RAT	167.21	28	28	4243200	4	4	4	N	21664	NADH dehydrogenase (Ubiquinone) 1 beta subcomplex, 5 (Predicted), isoform CRA_b OS=Rattus norvegicus OX=10116 GN=Ndufb5 PE=1 SV=1
41	46	P17764|THIL_RAT	162.52	12	12	2189300	4	4	4	N	44695	Acetyl-CoA acetyltransferase, mitochondrial OS=Rattus norvegicus OX=10116 GN=Acat1 PE=1 SV=1
32	39	P29147|BDH_RAT	155.31	15	15	6003700	5	5	5	N	38202	D-beta-hydroxybutyrate dehydrogenase, mitochondrial OS=Rattus norvegicus OX=10116 GN=Bdh1 PE=1 SV=2
32	40	tr|A0A0G2JSH2|A0A0G2JSH2_RAT	155.31	15	15	6003700	5	5	5	N	38333	3-hydroxybutyrate dehydrogenase, type 1, isoform CRA_a OS=Rattus norvegicus OX=10116 GN=Bdh1 PE=1 SV=1
55	64	Q02253|MMSA_RAT	153.04	10	10	3458800	3	3	3	N	57808	Methylmalonate-semialdehyde dehydrogenase [acylating], mitochondrial OS=Rattus norvegicus OX=10116 GN=Aldh6a1 PE=1 SV=1
55	65	tr|G3V7J0|G3V7J0_RAT	153.04	10	10	3458800	3	3	3	N	57748	Aldehyde dehydrogenase family 6, subfamily A1, isoform CRA_b OS=Rattus norvegicus OX=10116 GN=Aldh6a1 PE=1 SV=1
26	21	tr|Q5XIH3|Q5XIH3_RAT	151.14	18	18	4726100	7	7	7	N	50731	NADH dehydrogenase [ubiquinone] flavoprotein 1, mitochondrial OS=Rattus norvegicus OX=10116 GN=Ndufv1 PE=1 SV=1
30	27	P85834|EFTU_RAT	145	13	13	4037800	5	5	5	N	49522	Elongation factor Tu, mitochondrial OS=Rattus norvegicus OX=10116 GN=Tufm PE=1 SV=1
29	61	P63039|CH60_RAT	139.8	7	7	18976000	4	4	5	N	60956	60 kDa heat shock protein, mitochondrial OS=Rattus norvegicus OX=10116 GN=Hspd1 PE=1 SV=1
29	62	tr|A0A482IDN3|A0A482IDN3_RAT	139.8	7	7	18976000	4	4	5	N	60956	Hsp60 OS=Rattus norvegicus OX=10116 GN=Hspd1 PE=2 SV=1
90	4499	Q9JJW3|ATPMD_RAT	139.63	28	28	10314000	2	2	2	N	6408	ATP synthase membrane subunit DAPIT, mitochondrial OS=Rattus norvegicus OX=10116 GN=Atp5md PE=1 SV=1
35	4490	Q6PDU7|ATP5L_RAT	133.19	34	34	11005000	2	2	5	Y	11433	ATP synthase subunit g, mitochondrial OS=Rattus norvegicus OX=10116 GN=Atp5mg PE=1 SV=2
58	35	tr|Q6P6W6|Q6P6W6_RAT	128.01	20	20	1170700	3	3	3	N	31701	NADH dehydrogenase [ubiquinone] 1 alpha subcomplex subunit 10, mitochondrial OS=Rattus norvegicus OX=10116 GN=Ndufa10 PE=2 SV=1
58	23	Q561S0|NDUAA_RAT	128.01	15	15	1170700	3	3	3	N	40493	NADH dehydrogenase [ubiquinone] 1 alpha subcomplex subunit 10, mitochondrial OS=Rattus norvegicus OX=10116 GN=Ndufa10 PE=1 SV=1
58	26	tr|A0A1W2Q6F8|A0A1W2Q6F8_RAT	128.01	15	15	1170700	3	3	3	N	40544	NADH dehydrogenase [ubiquinone] 1 alpha subcomplex subunit 10, mitochondrial OS=Rattus norvegicus OX=10116 GN=Ndufa10l1 PE=3 SV=1
33	58	P19234|NDUV2_RAT	126.7	24	24	14809000	4	4	5	N	27378	NADH dehydrogenase [ubiquinone] flavoprotein 2, mitochondrial OS=Rattus norvegicus OX=10116 GN=Ndufv2 PE=1 SV=2
42	50	P10888|COX41_RAT	126.18	24	24	4134200	4	4	4	N	19515	Cytochrome c oxidase subunit 4 isoform 1, mitochondrial OS=Rattus norvegicus OX=10116 GN=Cox4i1 PE=1 SV=1
61	4494	D3Z9R8|ATP68_RAT	123.36	32	32	4396500	3	3	3	Y	6914	ATP synthase subunit ATP5MPL, mitochondrial OS=Rattus norvegicus OX=10116 GN=Atp5mpl PE=1 SV=1
49	44	P16970|ABCD3_RAT	122.68	5	5	1969000	2	2	3	N	75316	ATP-binding cassette sub-family D member 3 OS=Rattus norvegicus OX=10116 GN=Abcd3 PE=1 SV=3
48	76	O70351|HCD2_RAT	121.91	16	16	2753200	3	3	3	N	27246	3-hydroxyacyl-CoA dehydrogenase type-2 OS=Rattus norvegicus OX=10116 GN=Hsd17b10 PE=1 SV=3
48	77	tr|B0BMW2|B0BMW2_RAT	121.91	16	16	2753200	3	3	3	N	27250	3-hydroxyacyl-CoA dehydrogenase type-2 OS=Rattus norvegicus OX=10116 GN=Hsd17b10 PE=1 SV=1
56	105	tr|D3ZF13|D3ZF13_RAT	118.09	15	15	3263000	3	3	3	N	17514	Acyl carrier protein OS=Rattus norvegicus OX=10116 GN=Ndufab1 PE=1 SV=1
71	24	Q641Y2|NDUS2_RAT	108.84	5	5	4160900	2	2	2	N	52562	NADH dehydrogenase [ubiquinone] iron-sulfur protein 2, mitochondrial OS=Rattus norvegicus OX=10116 GN=Ndufs2 PE=1 SV=1
85	73	tr|B2RYS8|B2RYS8_RAT	106.22	15	15	1986100	2	2	2	N	21959	NADH dehydrogenase [ubiquinone] 1 beta subcomplex subunit 8, mitochondrial OS=Rattus norvegicus OX=10116 GN=Ndufb8 PE=1 SV=1
45	4487	tr|Q5UAJ5|Q5UAJ5_RAT	105.48	46	46	26910000	3	3	4	N	7642	ATP synthase protein 8 OS=Rattus norvegicus OX=10116 GN=ATP8 PE=3 SV=1
83	1	P32551|QCR2_RAT	104.52	6	6	0	2	2	2	N	48396	Cytochrome b-c1 complex subunit 2, mitochondrial OS=Rattus norvegicus OX=10116 GN=Uqcrc2 PE=1 SV=2
43	4486	P29419|ATP5I_RAT	101.05	52	52	15392000	4	4	4	N	8255	ATP synthase subunit e, mitochondrial OS=Rattus norvegicus OX=10116 GN=Atp5me PE=1 SV=3
63	4496	P21571|ATP5J_RAT	98.83	28	28	830950	2	2	3	N	12494	ATP synthase-coupling factor 6, mitochondrial OS=Rattus norvegicus OX=10116 GN=Atp5pf PE=1 SV=1
106	248	tr|G3V6I4|G3V6I4_RAT	98.24	9	9	1562300	1	1	1	N	37791	Mitochondrial amidoxime reducing component 1 OS=Rattus norvegicus OX=10116 GN=Marc1 PE=1 SV=1
196	170	Q63362|NDUA5_RAT	97.71	22	22	0	1	1	1	N	13412	NADH dehydrogenase [ubiquinone] 1 alpha subcomplex subunit 5 OS=Rattus norvegicus OX=10116 GN=Ndufa5 PE=1 SV=3
64	112	tr|Q5PQZ9|Q5PQZ9_RAT	97.41	21	21	638550	3	3	3	N	14359	NADH dehydrogenase [ubiquinone] 1 subunit C2 OS=Rattus norvegicus OX=10116 GN=Ndufc2 PE=1 SV=1
25	4488	D3ZAF6|ATPK_RAT	95.42	40	40	25060000	7	7	8	Y	10452	ATP synthase subunit f, mitochondrial OS=Rattus norvegicus OX=10116 GN=Atp5mf PE=1 SV=1
38	102	tr|F1LPB3|F1LPB3_RAT	94.17	4	4	288720	3	1	4	N	76559	Long-chain-fatty-acid--CoA ligase 5 OS=Rattus norvegicus OX=10116 GN=Acsl5 PE=1 SV=3
38	101	O88813|ACSL5_RAT	94.17	4	4	288720	3	1	4	N	76405	Long-chain-fatty-acid--CoA ligase 5 OS=Rattus norvegicus OX=10116 GN=Acsl5 PE=1 SV=1
39	53	B3DMA2|ACD11_RAT	89.68	4	4	3247200	4	4	4	N	87371	Acyl-CoA dehydrogenase family member 11 OS=Rattus norvegicus OX=10116 GN=Acad11 PE=1 SV=1
77	51	tr|Q5EBA4|Q5EBA4_RAT	88.7	8	8	2658700	2	2	2	N	33215	Nipsnap1 protein (Fragment) OS=Rattus norvegicus OX=10116 GN=Nipsnap1 PE=2 SV=1
77	52	tr|G3V728|G3V728_RAT	88.7	8	8	2658700	2	2	2	N	33346	4-nitrophenylphosphatase domain and non-neuronal SNAP25-like protein homolog 1 (C. elegans), isoform CRA_b OS=Rattus norvegicus OX=10116 GN=Nipsnap1 PE=1 SV=1
84	71	tr|F1LPG5|F1LPG5_RAT	82.67	29	29	1846400	2	2	2	N	15064	NADH:ubiquinone oxidoreductase subunit B4 OS=Rattus norvegicus OX=10116 GN=Ndufb4 PE=1 SV=1
36	29	tr|A0A140TAG5|A0A140TAG5_RAT	81.55	6	6	5965000	3	3	4	N	67049	MICOS complex subunit MIC60 OS=Rattus norvegicus OX=10116 GN=Immt PE=1 SV=1
36	22	tr|A0A0G2JVH4|A0A0G2JVH4_RAT	81.55	5	5	5965000	3	3	4	N	86230	MICOS complex subunit MIC60 OS=Rattus norvegicus OX=10116 GN=Immt PE=1 SV=1
36	30	Q3KR86|MIC60_RAT	81.55	6	6	5965000	3	3	4	N	67177	MICOS complex subunit Mic60 (Fragment) OS=Rattus norvegicus OX=10116 GN=Immt PE=1 SV=1
88	106	tr|D3ZXF9|D3ZXF9_RAT	80.57	9	9	952090	2	2	2	Y	29441	Mitochondrial ribosomal protein L12 OS=Rattus norvegicus OX=10116 GN=Mrpl12 PE=1 SV=1
59	4489	P29418|ATP5E_RAT	79.32	41	41	5361400	3	3	3	N	5767	ATP synthase subunit epsilon, mitochondrial OS=Rattus norvegicus OX=10116 GN=Atp5f1e PE=1 SV=2
62	67	tr|Q5RJN0|Q5RJN0_RAT	78.15	11	11	2352400	2	2	3	N	23945	NADH dehydrogenase (Ubiquinone) Fe-S protein 7 OS=Rattus norvegicus OX=10116 GN=Ndufs7 PE=1 SV=1
60	103	P04762|CATA_RAT	75.08	8	8	1307100	3	3	3	N	59757	Catalase OS=Rattus norvegicus OX=10116 GN=Cat PE=1 SV=3
51	63	Q09073|ADT2_RAT	69.12	10	10	2645600	3	3	3	N	32901	ADP/ATP translocase 2 OS=Rattus norvegicus OX=10116 GN=Slc25a5 PE=1 SV=3
153	66	Q8VID1|DHRS4_RAT	67.48	5	5	319920	1	1	1	N	29822	Dehydrogenase/reductase SDR family member 4 OS=Rattus norvegicus OX=10116 GN=Dhrs4 PE=2 SV=2
197	158	P11240|COX5A_RAT	62.99	17	17	0	1	1	1	N	16130	Cytochrome c oxidase subunit 5A, mitochondrial OS=Rattus norvegicus OX=10116 GN=Cox5a PE=1 SV=1
152	104	tr|A9UMV9|A9UMV9_RAT	61.39	11	11	407550	1	1	1	N	12500	NADH:ubiquinone oxidoreductase subunit A7 OS=Rattus norvegicus OX=10116 GN=Ndufa7 PE=1 SV=1
151	110	tr|D3ZCZ9|D3ZCZ9_RAT	58.66	9	9	865090	1	1	1	N	13040	NADH dehydrogenase [ubiquinone] iron-sulfur protein 6, mitochondrial OS=Rattus norvegicus OX=10116 GN=LOC100912599 PE=1 SV=1
151	178	P52504|NDUS6_RAT	58.66	9	9	865090	1	1	1	N	12783	NADH dehydrogenase [ubiquinone] iron-sulfur protein 6, mitochondrial OS=Rattus norvegicus OX=10116 GN=Ndufs6 PE=3 SV=1
91	100	tr|D3ZE15|D3ZE15_RAT	54.88	7	7	1861700	2	2	2	N	16777	NADH:ubiquinone oxidoreductase subunit A13 OS=Rattus norvegicus OX=10116 GN=Ndufa13 PE=1 SV=1
124	111	Q5RJR8|LRC59_RAT	54.45	4	4	723070	1	1	1	N	34869	Leucine-rich repeat-containing protein 59 OS=Rattus norvegicus OX=10116 GN=Lrrc59 PE=1 SV=1
150	160	Q8VHF5|CISY_RAT	50.03	2	2	0	1	1	1	N	51867	Citrate synthase, mitochondrial OS=Rattus norvegicus OX=10116 GN=Cs PE=1 SV=1
150	161	tr|G3V936|G3V936_RAT	50.03	2	2	0	1	1	1	N	51831	Citrate synthase OS=Rattus norvegicus OX=10116 GN=Cs PE=1 SV=1
198	234	tr|Q06QK5|Q06QK5_RAT	46.65	2	2	2808500	1	1	1	N	68606	NADH-ubiquinone oxidoreductase chain 5 OS=Rattus norvegicus OX=10116 GN=ND5 PE=3 SV=1
198	235	P11661|NU5M_RAT	46.65	2	2	2808500	1	1	1	N	68618	NADH-ubiquinone oxidoreductase chain 5 OS=Rattus norvegicus OX=10116 GN=Mtnd5 PE=3 SV=3
198	239	tr|Q06QG6|Q06QG6_RAT	46.65	2	2	2808500	1	1	1	N	68588	NADH-ubiquinone oxidoreductase chain 5 OS=Rattus norvegicus OX=10116 GN=ND5 PE=3 SV=1
198	236	tr|Q06QA1|Q06QA1_RAT	46.65	2	2	2808500	1	1	1	N	68574	NADH-ubiquinone oxidoreductase chain 5 OS=Rattus norvegicus OX=10116 GN=ND5 PE=3 SV=1
198	240	tr|A7XYD5|A7XYD5_RAT	46.65	2	2	2808500	1	1	1	N	68856	NADH-ubiquinone oxidoreductase chain 5 OS=Rattus norvegicus OX=10116 GN=Nd5 PE=3 SV=1
198	237	tr|Q8SEZ0|Q8SEZ0_RAT	46.65	2	2	2808500	1	1	1	N	68618	NADH-ubiquinone oxidoreductase chain 5 OS=Rattus norvegicus OX=10116 GN=Mt-nd5 PE=3 SV=1
198	238	tr|A0A096XKT9|A0A096XKT9_RAT	46.65	2	2	2808500	1	1	1	N	68584	NADH-ubiquinone oxidoreductase chain 5 OS=Rattus norvegicus OX=10116 GN=ND5 PE=3 SV=1
198	241	tr|A7XYC1|A7XYC1_RAT	46.65	2	2	2808500	1	1	1	N	68841	NADH-ubiquinone oxidoreductase chain 5 OS=Rattus norvegicus OX=10116 GN=Nd5 PE=3 SV=1
198	242	tr|A0A0A1FZN8|A0A0A1FZN8_RAT	46.65	2	2	2808500	1	1	1	N	68970	NADH-ubiquinone oxidoreductase chain 5 OS=Rattus norvegicus OX=10116 GN=ND5 PE=3 SV=1
89	113	tr|B2RYW3|B2RYW3_RAT	44.46	11	11	1696700	2	2	2	N	21892	NADH dehydrogenase (Ubiquinone) 1 beta subcomplex, 9 OS=Rattus norvegicus OX=10116 GN=Ndufb9 PE=1 SV=1
86	80	tr|S5RZM8|S5RZM8_RAT	44.27	7	7	2403600	2	2	2	Y	25958	Cytochrome c oxidase subunit 2 OS=Rattus norvegicus OX=10116 GN=COX2 PE=3 SV=1
86	81	P00406|COX2_RAT	44.27	7	7	2403600	2	2	2	Y	25928	Cytochrome c oxidase subunit 2 OS=Rattus norvegicus OX=10116 GN=Mtco2 PE=1 SV=3
86	68	tr|Q5UAJ6|Q5UAJ6_RAT	44.27	7	7	2403600	2	2	2	Y	25942	Cytochrome c oxidase subunit 2 OS=Rattus norvegicus OX=10116 GN=COX2 PE=3 SV=1
86	109	tr|Q37652|Q37652_RAT	44.27	7	7	2403600	2	2	2	Y	26007	Cytochrome c oxidase subunit 2 OS=Rattus norvegicus OX=10116 GN=COXII PE=3 SV=1
86	82	tr|Q8SEZ5|Q8SEZ5_RAT	44.27	7	7	2403600	2	2	2	Y	25928	Cytochrome c oxidase subunit 2 OS=Rattus norvegicus OX=10116 GN=Mt-co2 PE=1 SV=1
86	83	tr|A0A097PE04|A0A097PE04_RAT	44.27	7	7	2403600	2	2	2	Y	25894	Cytochrome c oxidase subunit 2 OS=Rattus norvegicus OX=10116 GN=COX2 PE=3 SV=1
87	60	tr|B0BNE6|B0BNE6_RAT	43.56	8	8	129890	2	2	2	Y	23970	NADH dehydrogenase (Ubiquinone) Fe-S protein 8 (Predicted), isoform CRA_a OS=Rattus norvegicus OX=10116 GN=Ndufs8 PE=1 SV=1
154	15	Q68FY0|QCR1_RAT	43.38	5	5	0	1	1	1	N	52849	Cytochrome b-c1 complex subunit 1, mitochondrial OS=Rattus norvegicus OX=10116 GN=Uqcrc1 PE=1 SV=1
50	1061	tr|D3ZKG9|D3ZKG9_RAT	41.98	2	2	6711400	3	2	3	Y	145348	Clustered mitochondria protein homolog OS=Rattus norvegicus OX=10116 GN=Cluh PE=1 SV=3
50	1062	tr|A0A0U1RRV5|A0A0U1RRV5_RAT	41.98	2	2	6711400	3	2	3	Y	151165	Clustered mitochondria protein homolog OS=Rattus norvegicus OX=10116 GN=Cluh PE=1 SV=1
199	88	tr|D4A3V2|D4A3V2_RAT	41.62	8	8	621300	1	1	1	N	15224	NADH dehydrogenase [ubiquinone] 1 alpha subcomplex subunit 6 OS=Rattus norvegicus OX=10116 GN=Ndufa6 PE=1 SV=1
149	1110	Q06437|ODPAT_RAT	39.87	3	3	1103200	1	1	1	N	43393	Pyruvate dehydrogenase E1 component subunit alpha, testis-specific form, mitochondrial OS=Rattus norvegicus OX=10116 GN=Pdha2 PE=1 SV=1
200	228	tr|Q7TP12|Q7TP12_RAT	39.81	10	10	1252600	1	1	1	N	14969	Cc2-17 OS=Rattus norvegicus OX=10116 GN=Sqor PE=1 SV=1
200	38	tr|B0BMT9|B0BMT9_RAT	39.81	3	3	1252600	1	1	1	N	50202	Sqrdl protein OS=Rattus norvegicus OX=10116 GN=Sqor PE=1 SV=1
125	96	tr|D3ZFJ6|D3ZFJ6_RAT	37.93	7	7	889180	1	1	1	N	60420	Lactamase, beta OS=Rattus norvegicus OX=10116 GN=Lactb PE=1 SV=1
201	276	tr|F1LTG5|F1LTG5_RAT	37.15	14	14	1812200	1	1	1	N	13829	Uncharacterized protein OS=Rattus norvegicus OX=10116 PE=4 SV=2
201	133	P12075|COX5B_RAT	37.15	14	14	1812200	1	1	1	N	13915	Cytochrome c oxidase subunit 5B, mitochondrial OS=Rattus norvegicus OX=10116 GN=Cox5b PE=1 SV=2
31	539	F1M775|DIAP1_RAT	36.97	2	2	21662000	3	3	5	Y	140418	Protein diaphanous homolog 1 OS=Rattus norvegicus OX=10116 GN=Diaph1 PE=1 SV=3
95	365	tr|G3V8G1|G3V8G1_RAT	33.48	1	1	12791000	2	1	2	Y	137113	ATP/GTP binding protein 1 (Predicted), isoform CRA_a OS=Rattus norvegicus OX=10116 GN=Agtpbp1 PE=4 SV=1
93	484	Q80W57|ABCG2_RAT	33.48	3	3	3650700	2	1	2	N	72961	Broad substrate specificity ATP-binding cassette transporter ABCG2 OS=Rattus norvegicus OX=10116 GN=Abcg2 PE=1 SV=1
202	373	Q641Y8|DDX1_RAT	31.84	2	2	1115600	1	1	1	Y	82497	ATP-dependent RNA helicase DDX1 OS=Rattus norvegicus OX=10116 GN=Ddx1 PE=1 SV=1
74	482	tr|D3ZXA6|D3ZXA6_RAT	29.61	3	3	2048500	2	2	2	N	98819	Pyruvate dehydrogenase phosphatase regulatory subunit OS=Rattus norvegicus OX=10116 GN=Pdpr PE=1 SV=1
69	321	tr|F1LNF0|F1LNF0_RAT	29.17	1	1	4369000	2	2	2	N	228912	Myosin heavy chain 14 OS=Rattus norvegicus OX=10116 GN=Myh14 PE=1 SV=1
47	421	P11497|ACACA_RAT	28.67	1	1	1605200	3	2	3	Y	265191	Acetyl-CoA carboxylase 1 OS=Rattus norvegicus OX=10116 GN=Acaca PE=1 SV=1
203	941	tr|D4A6J4|D4A6J4_RAT	2020-09-28	1	1	1023600	1	1	1	N	111741	DNA topoisomerase OS=Rattus norvegicus OX=10116 GN=Top3a PE=3 SV=3
75	515	tr|A0A0G2K5L6|A0A0G2K5L6_RAT	27.72	1	1	0	2	1	2	Y	275755	Acetyl-CoA carboxylase beta OS=Rattus norvegicus OX=10116 GN=Acacb PE=1 SV=1
75	516	tr|A0A0G2K1F2|A0A0G2K1F2_RAT	27.72	1	1	0	2	1	2	Y	276393	Acetyl-CoA carboxylase beta OS=Rattus norvegicus OX=10116 GN=Acacb PE=1 SV=1
75	518	tr|D3ZBE2|D3ZBE2_RAT	27.72	1	1	0	2	1	2	Y	275967	Acetyl-CoA carboxylase beta OS=Rattus norvegicus OX=10116 GN=Acacb PE=1 SV=3
75	519	tr|E9PSQ0|E9PSQ0_RAT	27.72	1	1	0	2	1	2	Y	276255	Acetyl-CoA carboxylase beta OS=Rattus norvegicus OX=10116 GN=Acacb PE=1 SV=2
75	517	tr|O70151|O70151_RAT	27.72	1	1	0	2	1	2	Y	276097	Acetyl-CoA carboxylase OS=Rattus norvegicus OX=10116 GN=Acacb PE=2 SV=1
112	1624	tr|D3ZUJ5|D3ZUJ5_RAT	25.99	8	8	2021600	1	1	1	Y	23973	Deoxythymidylate kinase OS=Rattus norvegicus OX=10116 GN=Dtymk PE=1 SV=1
204	119	P32198|CPT1A_RAT	25.76	2	2	292360	1	1	1	N	88126	Carnitine O-palmitoyltransferase 1, liver isoform OS=Rattus norvegicus OX=10116 GN=Cpt1a PE=1 SV=2
163	4506	Q5BJQ0|COQ8A_RAT	25.69	1	1	0	1	1	1	N	72226	Atypical kinase COQ8A, mitochondrial OS=Rattus norvegicus OX=10116 GN=Coq8a PE=2 SV=1
159	784	tr|A0A0G2JX15|A0A0G2JX15_RAT	2020-10-25	1	1	715910	1	1	1	N	121101	Cation-transporting ATPase OS=Rattus norvegicus OX=10116 GN=Atp13a2 PE=3 SV=1
92	4509	Q06645|AT5G1_RAT	24.35	5	5	11261000	1	1	2	N	14244	ATP synthase F(0) complex subunit C1, mitochondrial OS=Rattus norvegicus OX=10116 GN=Atp5mc1 PE=1 SV=1
92	4510	tr|Q499S2|Q499S2_RAT	24.35	5	5	11261000	1	1	2	N	14745	ATP synthase F(0) complex subunit C3, mitochondrial OS=Rattus norvegicus OX=10116 GN=Atp5mc3 PE=2 SV=1
92	4511	Q06646|AT5G2_RAT	24.35	5	5	11261000	1	1	2	N	14918	ATP synthase F(0) complex subunit C2, mitochondrial OS=Rattus norvegicus OX=10116 GN=Atp5mc2 PE=1 SV=1
92	4512	Q71S46|AT5G3_RAT	24.35	5	5	11261000	1	1	2	N	14693	ATP synthase F(0) complex subunit C3, mitochondrial OS=Rattus norvegicus OX=10116 GN=Atp5mc3 PE=1 SV=1
92	4513	tr|A0A0G2JTN8|A0A0G2JTN8_RAT	24.35	5	5	11261000	1	1	2	N	15465	ATP synthase F(0) complex subunit C2, mitochondrial OS=Rattus norvegicus OX=10116 GN=Atp5mc2 PE=3 SV=1
81	701	tr|F1LMJ8|F1LMJ8_RAT	24.29	5	5	6004200	2	2	2	N	49215	Calcium uptake protein 2, mitochondrial OS=Rattus norvegicus OX=10116 GN=Micu2 PE=1 SV=1
160	1534	tr|D3ZSM9|D3ZSM9_RAT	24.2	1	1	934160	1	1	1	Y	88476	BRCA1-associated ATM activator 1 OS=Rattus norvegicus OX=10116 GN=Brat1 PE=1 SV=3
120	549	P05708|HXK1_RAT	24.14	1	1	540180	1	1	1	N	102408	Hexokinase-1 OS=Rattus norvegicus OX=10116 GN=Hk1 PE=1 SV=4
120	533	tr|M0RAQ6|M0RAQ6_RAT	24.14	1	1	540180	1	1	1	N	99557	Hexokinase-1 OS=Rattus norvegicus OX=10116 GN=Hk1 PE=1 SV=2
120	468	Q63704|CPT1B_RAT	24.14	1	1	540180	1	1	1	N	88217	Carnitine O-palmitoyltransferase 1, muscle isoform OS=Rattus norvegicus OX=10116 GN=Cpt1b PE=1 SV=1
120	489	F1LN46|CPT1C_RAT	24.14	1	1	540180	1	1	1	N	90170	Carnitine O-palmitoyltransferase 1, brain isoform OS=Rattus norvegicus OX=10116 GN=Cpt1c PE=1 SV=1
208	137	Q9WVK7|HCDH_RAT	23.96	3	3	0	1	1	1	N	34448	Hydroxyacyl-coenzyme A dehydrogenase, mitochondrial OS=Rattus norvegicus OX=10116 GN=Hadh PE=2 SV=1
94	4538	tr|B1WBM1|B1WBM1_RAT	23.77	3	3	949520	2	1	2	Y	58354	FAST kinase domain-containing protein 3, mitochondrial OS=Rattus norvegicus OX=10116 GN=Fastkd3 PE=2 SV=1
94	4541	Q68FN9|FAKD3_RAT	23.77	2	2	949520	2	1	2	Y	75248	FAST kinase domain-containing protein 3, mitochondrial OS=Rattus norvegicus OX=10116 GN=Fastkd3 PE=2 SV=2
209	4519	tr|D3ZA45|D3ZA45_RAT	23.63	2	2	8430000	1	1	1	N	52491	Autophagy-related protein 13 OS=Rattus norvegicus OX=10116 GN=Atg13 PE=1 SV=2
107	162	tr|D3Z900|D3Z900_RAT	23.39	3	3	0	1	1	1	N	38239	Mitochondrial amidoxime reducing component 2 OS=Rattus norvegicus OX=10116 GN=Marc2 PE=1 SV=2
107	163	O88994|MARC2_RAT	23.39	3	3	0	1	1	1	N	38249	Mitochondrial amidoxime reducing component 2 OS=Rattus norvegicus OX=10116 GN=Marc2 PE=2 SV=1
107	164	tr|M0R6N2|M0R6N2_RAT	23.39	3	3	0	1	1	1	N	38175	MOSC domain-containing protein 2, mitochondrial-like OS=Rattus norvegicus OX=10116 GN=LOC100910481 PE=1 SV=1
127	4501	tr|F1LUC0|F1LUC0_RAT	2020-03-23	1	1	0	1	1	1	Y	72937	Similar to RIKEN cDNA 5730410E15 gene (Predicted), isoform CRA_a OS=Rattus norvegicus OX=10116 GN=Sybu PE=1 SV=2
28	4514	tr|F1LSY7|F1LSY7_RAT	22.67	1	1	76808000	1	1	5	Y	109031	Endoplasmic reticulum to nucleus-signaling 1 OS=Rattus norvegicus OX=10116 GN=Ern1 PE=4 SV=2
28	4515	tr|A0A0G2K2H4|A0A0G2K2H4_RAT	22.67	1	1	76808000	1	1	5	Y	110150	Endoplasmic reticulum to nucleus-signaling 1 OS=Rattus norvegicus OX=10116 GN=Ern1 PE=2 SV=1
168	1019	Q2M2R8|PEX5_RAT	22.32	1	1	1913400	1	1	1	N	71022	Peroxisomal targeting signal 1 receptor OS=Rattus norvegicus OX=10116 GN=Pex5 PE=1 SV=2
170	1370	Q6IMY1|MTUS1_RAT	21.96	2	2	0	1	1	1	N	50745	Microtubule-associated tumor suppressor 1 homolog OS=Rattus norvegicus OX=10116 GN=Mtus1 PE=1 SV=1
170	1371	tr|B2GVA4|B2GVA4_RAT	21.96	2	2	0	1	1	1	N	50728	Mitochondrial tumor suppressor 1 OS=Rattus norvegicus OX=10116 GN=Mtus1 PE=2 SV=1
169	4525	tr|R9PXR4|R9PXR4_RAT	21.95	1	1	9344600	1	1	1	N	61939	Mitochondrial import receptor subunit TOM70 OS=Rattus norvegicus OX=10116 GN=Tomm70 PE=1 SV=1
169	4526	Q75Q39|TOM70_RAT	21.95	1	1	9344600	1	1	1	N	67445	Mitochondrial import receptor subunit TOM70 OS=Rattus norvegicus OX=10116 GN=Tomm70 PE=1 SV=1
100	396	P11530|DMD_RAT	21.17	0	0	1781200	1	1	1	N	425830	Dystrophin OS=Rattus norvegicus OX=10116 GN=Dmd PE=1 SV=2
98	834	tr|A0A0G2JYD4|A0A0G2JYD4_RAT	20.72	0	0	4631000	1	1	1	N	487857	Vacuolar protein sorting 13 homolog D OS=Rattus norvegicus OX=10116 GN=Vps13d PE=1 SV=1
98	835	tr|D3ZKC6|D3ZKC6_RAT	20.72	0	0	4631000	1	1	1	N	488962	Vacuolar protein sorting 13 homolog D OS=Rattus norvegicus OX=10116 GN=Vps13d PE=1 SV=1
213	4555	Q5EBA0|ERAL1_RAT	20.48	2	2	0	1	1	1	N	48379	GTPase Era, mitochondrial OS=Rattus norvegicus OX=10116 GN=Eral1 PE=2 SV=2
214	4556	Q8VIJ5|OGA_RAT	20.14	1	1	1932800	1	1	1	N	102918	Protein O-GlcNAcase OS=Rattus norvegicus OX=10116 GN=Oga PE=1 SV=1

## Sheet: RLM KCl-BM PTP III(2)-IVx
Protein Group	Protein ID	Accession	-10lgP	Coverage (%)	Coverage (%) Sample 6	IBAQ	#Peptides	#Unique	#Spec Sample 6	PTM	Avg. Mass	Description
2	13	P15999|ATPA_RAT	360.38	52	52	99869000	38	38	73	Y	59754	ATP synthase subunit alpha, mitochondrial OS=Rattus norvegicus OX=10116 GN=Atp5f1a PE=1 SV=2
1	6	P52873|PYC_RAT	341.35	48	48	79987000	60	59	74	Y	129777	Pyruvate carboxylase, mitochondrial OS=Rattus norvegicus OX=10116 GN=Pc PE=1 SV=2
1	7	tr|A0A0G2JTL5|A0A0G2JTL5_RAT	341.35	44	44	79987000	60	59	74	Y	140005	Pyruvate carboxylase, mitochondrial OS=Rattus norvegicus OX=10116 GN=Pc PE=1 SV=1
3	3	P07756|CPSM_RAT	338.51	35	35	54889000	45	45	54	Y	164579	Carbamoyl-phosphate synthase [ammonia], mitochondrial OS=Rattus norvegicus OX=10116 GN=Cps1 PE=1 SV=1
4	15	Q68FY0|QCR1_RAT	312.74	51	51	64196000	27	27	53	Y	52849	Cytochrome b-c1 complex subunit 1, mitochondrial OS=Rattus norvegicus OX=10116 GN=Uqcrc1 PE=1 SV=1
7	5	Q64428|ECHA_RAT	311.16	36	36	26912000	28	28	35	Y	82665	Trifunctional enzyme subunit alpha, mitochondrial OS=Rattus norvegicus OX=10116 GN=Hadha PE=1 SV=2
5	9	tr|G3V6D3|G3V6D3_RAT	292.82	64	64	95063000	30	30	47	Y	56345	ATP synthase subunit beta OS=Rattus norvegicus OX=10116 GN=Atp5f1b PE=1 SV=1
5	8	P10719|ATPB_RAT	292.82	64	64	95063000	30	30	47	Y	56354	ATP synthase subunit beta, mitochondrial OS=Rattus norvegicus OX=10116 GN=Atp5f1b PE=1 SV=2
6	1	P32551|QCR2_RAT	291.19	63	63	72356000	30	30	36	Y	48396	Cytochrome b-c1 complex subunit 2, mitochondrial OS=Rattus norvegicus OX=10116 GN=Uqcrc2 PE=1 SV=2
9	103	P04762|CATA_RAT	271.11	43	43	24425000	22	21	27	Y	59757	Catalase OS=Rattus norvegicus OX=10116 GN=Cat PE=1 SV=3
8	10	P22791|HMCS2_RAT	263.3	47	47	34999000	26	26	29	Y	56912	Hydroxymethylglutaryl-CoA synthase, mitochondrial OS=Rattus norvegicus OX=10116 GN=Hmgcs2 PE=1 SV=1
8	11	tr|Q68G44|Q68G44_RAT	263.3	47	47	34999000	26	26	29	Y	56886	3-hydroxy-3-methylglutaryl coenzyme A synthase OS=Rattus norvegicus OX=10116 GN=Hmgcs2 PE=1 SV=1
10	31	Q60587|ECHB_RAT	229.74	32	32	12872000	14	13	14	Y	51414	Trifunctional enzyme subunit beta, mitochondrial OS=Rattus norvegicus OX=10116 GN=Hadhb PE=1 SV=1
18	2	P10860|DHE3_RAT	224.24	19	19	8337700	8	8	10	N	61416	Glutamate dehydrogenase 1, mitochondrial OS=Rattus norvegicus OX=10116 GN=Glud1 PE=1 SV=2
12	45	P20788|UCRI_RAT	215.16	41	41	15370000	12	12	14	N	29446	Cytochrome b-c1 complex subunit Rieske, mitochondrial OS=Rattus norvegicus OX=10116 GN=Uqcrfs1 PE=1 SV=2
15	61	P63039|CH60_RAT	193.4	21	21	5668300	12	11	12	N	60956	60 kDa heat shock protein, mitochondrial OS=Rattus norvegicus OX=10116 GN=Hspd1 PE=1 SV=1
15	62	tr|A0A482IDN3|A0A482IDN3_RAT	193.4	21	21	5668300	12	11	12	N	60956	Hsp60 OS=Rattus norvegicus OX=10116 GN=Hspd1 PE=2 SV=1
13	28	P18163|ACSL1_RAT	187.16	13	13	7044600	11	7	13	Y	78179	Long-chain-fatty-acid--CoA ligase 1 OS=Rattus norvegicus OX=10116 GN=Acsl1 PE=1 SV=1
11	42	tr|D3ZFQ8|D3ZFQ8_RAT	183.71	39	39	16026000	10	10	14	Y	35435	Cytochrome c-1 OS=Rattus norvegicus OX=10116 GN=Cyc1 PE=1 SV=3
14	55	P24329|THTR_RAT	183.23	32	32	8548700	9	8	13	N	33407	Thiosulfate sulfurtransferase OS=Rattus norvegicus OX=10116 GN=Tst PE=1 SV=3
35	64	Q02253|MMSA_RAT	180.77	13	13	3605700	5	5	5	N	57808	Methylmalonate-semialdehyde dehydrogenase [acylating], mitochondrial OS=Rattus norvegicus OX=10116 GN=Aldh6a1 PE=1 SV=1
35	65	tr|G3V7J0|G3V7J0_RAT	180.77	13	13	3605700	5	5	5	N	57748	Aldehyde dehydrogenase family 6, subfamily A1, isoform CRA_b OS=Rattus norvegicus OX=10116 GN=Aldh6a1 PE=1 SV=1
20	1579	tr|D4ACE9|D4ACE9_RAT	173.93	10	10	4838200	9	8	9	Y	103115	Alpha-aminoadipic semialdehyde synthase, mitochondrial OS=Rattus norvegicus OX=10116 GN=Aass PE=1 SV=3
20	1580	A2VCW9|AASS_RAT	173.93	10	10	4838200	9	8	9	Y	102908	Alpha-aminoadipic semialdehyde synthase, mitochondrial OS=Rattus norvegicus OX=10116 GN=Aass PE=2 SV=1
16	114	P19511|AT5F1_RAT	170.49	30	30	11113000	8	8	11	N	28869	ATP synthase F(0) complex subunit B1, mitochondrial OS=Rattus norvegicus OX=10116 GN=Atp5pb PE=1 SV=1
45	46	P17764|THIL_RAT	170.37	13	13	1632300	4	4	4	N	44695	Acetyl-CoA acetyltransferase, mitochondrial OS=Rattus norvegicus OX=10116 GN=Acat1 PE=1 SV=1
21	97	P35435|ATPG_RAT	169.68	29	29	6072900	9	9	9	Y	30191	ATP synthase subunit gamma, mitochondrial OS=Rattus norvegicus OX=10116 GN=Atp5f1c PE=1 SV=2
21	95	tr|Q6QI09|Q6QI09_RAT	169.68	13	13	6072900	9	9	9	Y	67721	ATP synthase subunit gamma, mitochondrial OS=Rattus norvegicus OX=10116 GN=Taf3 PE=1 SV=1
30	44	P16970|ABCD3_RAT	168.52	14	14	3178700	6	6	6	N	75316	ATP-binding cassette sub-family D member 3 OS=Rattus norvegicus OX=10116 GN=Abcd3 PE=1 SV=3
29	204	P31399|ATP5H_RAT	168.3	41	41	3042300	6	6	6	N	18763	ATP synthase subunit d, mitochondrial OS=Rattus norvegicus OX=10116 GN=Atp5pd PE=1 SV=3
17	4	P00507|AATM_RAT	167.1	20	20	8105600	9	9	11	Y	47314	Aspartate aminotransferase, mitochondrial OS=Rattus norvegicus OX=10116 GN=Got2 PE=1 SV=2
22	188	Q06647|ATPO_RAT	166.12	34	34	7368900	8	8	9	Y	23398	ATP synthase subunit O, mitochondrial OS=Rattus norvegicus OX=10116 GN=Atp5po PE=1 SV=1
25	47	P0C2X9|AL4A1_RAT	162.06	13	13	3877700	6	6	6	N	61869	Delta-1-pyrroline-5-carboxylate dehydrogenase, mitochondrial OS=Rattus norvegicus OX=10116 GN=Aldh4a1 PE=1 SV=1
23	32	P13086|SUCA_RAT	150.81	16	16	4132500	6	6	7	N	36148	Succinate--CoA ligase [ADP/GDP-forming] subunit alpha, mitochondrial OS=Rattus norvegicus OX=10116 GN=Suclg1 PE=2 SV=2
23	33	tr|A0A0H2UHE1|A0A0H2UHE1_RAT	150.81	16	16	4132500	6	6	7	N	37560	Succinate--CoA ligase [ADP/GDP-forming] subunit alpha, mitochondrial OS=Rattus norvegicus OX=10116 GN=Suclg1 PE=1 SV=1
27	91	P45953|ACADV_RAT	147.05	10	10	4548300	5	5	6	N	70749	Very long-chain specific acyl-CoA dehydrogenase, mitochondrial OS=Rattus norvegicus OX=10116 GN=Acadvl PE=1 SV=1
27	92	tr|Q5M9H2|Q5M9H2_RAT	147.05	10	10	4548300	5	5	6	N	70821	Acyl-Coenzyme A dehydrogenase, very long chain OS=Rattus norvegicus OX=10116 GN=Acadvl PE=1 SV=1
19	50	P10888|COX41_RAT	143.7	35	35	7154100	8	8	10	N	19515	Cytochrome c oxidase subunit 4 isoform 1, mitochondrial OS=Rattus norvegicus OX=10116 GN=Cox4i1 PE=1 SV=1
33	133	P12075|COX5B_RAT	133.5	37	37	4379500	5	5	6	Y	13915	Cytochrome c oxidase subunit 5B, mitochondrial OS=Rattus norvegicus OX=10116 GN=Cox5b PE=1 SV=2
43	76	O70351|HCD2_RAT	131.08	22	22	1861400	3	3	4	N	27246	3-hydroxyacyl-CoA dehydrogenase type-2 OS=Rattus norvegicus OX=10116 GN=Hsd17b10 PE=1 SV=3
43	77	tr|B0BMW2|B0BMW2_RAT	131.08	22	22	1861400	3	3	4	N	27250	3-hydroxyacyl-CoA dehydrogenase type-2 OS=Rattus norvegicus OX=10116 GN=Hsd17b10 PE=1 SV=1
26	12418	tr|A0A0G2K401|A0A0G2K401_RAT	126.42	8	8	426670	6	1	6	N	79812	Propionyl-CoA carboxylase alpha chain, mitochondrial OS=Rattus norvegicus OX=10116 GN=Pcca PE=1 SV=1
26	12419	tr|A0A0G2K5P9|A0A0G2K5P9_RAT	126.42	7	7	426670	6	1	6	N	81413	Propionyl-CoA carboxylase alpha chain, mitochondrial OS=Rattus norvegicus OX=10116 GN=Pcca PE=1 SV=1
28	908	P14882|PCCA_RAT	124.78	8	8	1582100	6	1	6	Y	81623	Propionyl-CoA carboxylase alpha chain, mitochondrial OS=Rattus norvegicus OX=10116 GN=Pcca PE=1 SV=3
46	12420	P07633|PCCB_RAT	121.69	7	7	2410500	3	3	3	N	58626	Propionyl-CoA carboxylase beta chain, mitochondrial OS=Rattus norvegicus OX=10116 GN=Pccb PE=2 SV=1
46	12417	tr|Q68FZ8|Q68FZ8_RAT	121.69	7	7	2410500	3	3	3	N	58678	Propionyl coenzyme A carboxylase, beta polypeptide OS=Rattus norvegicus OX=10116 GN=Pccb PE=1 SV=1
37	70	tr|B2RYT5|B2RYT5_RAT	117.43	45	45	8005400	5	5	5	N	12651	Cox7a2l protein OS=Rattus norvegicus OX=10116 GN=Cox7a2l PE=2 SV=1
42	158	P11240|COX5A_RAT	100.74	25	25	1510100	4	4	4	N	16130	Cytochrome c oxidase subunit 5A, mitochondrial OS=Rattus norvegicus OX=10116 GN=Cox5a PE=1 SV=1
32	101	O88813|ACSL5_RAT	100.56	10	10	1463700	6	3	6	Y	76405	Long-chain-fatty-acid--CoA ligase 5 OS=Rattus norvegicus OX=10116 GN=Acsl5 PE=1 SV=1
32	102	tr|F1LPB3|F1LPB3_RAT	100.56	10	10	1463700	6	3	6	Y	76559	Long-chain-fatty-acid--CoA ligase 5 OS=Rattus norvegicus OX=10116 GN=Acsl5 PE=1 SV=3
40	63	Q09073|ADT2_RAT	96.09	13	13	2830300	4	4	4	N	32901	ADP/ATP translocase 2 OS=Rattus norvegicus OX=10116 GN=Slc25a5 PE=1 SV=3
36	109	tr|Q37652|Q37652_RAT	93.98	15	15	5559100	4	4	5	Y	26007	Cytochrome c oxidase subunit 2 OS=Rattus norvegicus OX=10116 GN=COXII PE=3 SV=1
36	80	tr|S5RZM8|S5RZM8_RAT	93.98	15	15	5559100	4	4	5	Y	25958	Cytochrome c oxidase subunit 2 OS=Rattus norvegicus OX=10116 GN=COX2 PE=3 SV=1
36	81	P00406|COX2_RAT	93.98	15	15	5559100	4	4	5	Y	25928	Cytochrome c oxidase subunit 2 OS=Rattus norvegicus OX=10116 GN=Mtco2 PE=1 SV=3
36	68	tr|Q5UAJ6|Q5UAJ6_RAT	93.98	15	15	5559100	4	4	5	Y	25942	Cytochrome c oxidase subunit 2 OS=Rattus norvegicus OX=10116 GN=COX2 PE=3 SV=1
36	82	tr|Q8SEZ5|Q8SEZ5_RAT	93.98	15	15	5559100	4	4	5	Y	25928	Cytochrome c oxidase subunit 2 OS=Rattus norvegicus OX=10116 GN=Mt-co2 PE=1 SV=1
36	83	tr|A0A097PE04|A0A097PE04_RAT	93.98	15	15	5559100	4	4	5	Y	25894	Cytochrome c oxidase subunit 2 OS=Rattus norvegicus OX=10116 GN=COX2 PE=3 SV=1
76	205	Q5M9I5|QCR6_RAT	90.61	21	21	2255800	1	1	2	N	10424	Cytochrome b-c1 complex subunit 6, mitochondrial OS=Rattus norvegicus OX=10116 GN=Uqcrh PE=3 SV=1
64	51	tr|Q5EBA4|Q5EBA4_RAT	90.35	8	8	835520	2	2	2	N	33215	Nipsnap1 protein (Fragment) OS=Rattus norvegicus OX=10116 GN=Nipsnap1 PE=2 SV=1
64	52	tr|G3V728|G3V728_RAT	90.35	8	8	835520	2	2	2	N	33346	4-nitrophenylphosphatase domain and non-neuronal SNAP25-like protein homolog 1 (C. elegans), isoform CRA_b OS=Rattus norvegicus OX=10116 GN=Nipsnap1 PE=1 SV=1
75	248	tr|G3V6I4|G3V6I4_RAT	86.14	9	9	511570	1	1	2	N	37791	Mitochondrial amidoxime reducing component 1 OS=Rattus norvegicus OX=10116 GN=Marc1 PE=1 SV=1
153	12439	Q5XIT9|MCCB_RAT	81.51	4	4	139210	1	1	1	N	61517	Methylcrotonoyl-CoA carboxylase beta chain, mitochondrial OS=Rattus norvegicus OX=10116 GN=Mccc2 PE=2 SV=1
44	39	P29147|BDH_RAT	80.43	8	8	2888000	4	4	4	N	38202	D-beta-hydroxybutyrate dehydrogenase, mitochondrial OS=Rattus norvegicus OX=10116 GN=Bdh1 PE=1 SV=2
44	40	tr|A0A0G2JSH2|A0A0G2JSH2_RAT	80.43	8	8	2888000	4	4	4	N	38333	3-hydroxybutyrate dehydrogenase, type 1, isoform CRA_a OS=Rattus norvegicus OX=10116 GN=Bdh1 PE=1 SV=1
47	167	P35434|ATPD_RAT	78.79	17	17	4553400	3	3	3	N	17595	ATP synthase subunit delta, mitochondrial OS=Rattus norvegicus OX=10116 GN=Atp5f1d PE=1 SV=2
47	168	tr|G3V7Y3|G3V7Y3_RAT	78.79	17	17	4553400	3	3	3	N	17563	ATP synthase subunit delta, mitochondrial OS=Rattus norvegicus OX=10116 GN=Atp5f1d PE=1 SV=1
73	48	Q9WVK3|PECR_RAT	75.64	6	6	515410	2	2	2	N	32433	Peroxisomal trans-2-enoyl-CoA reductase OS=Rattus norvegicus OX=10116 GN=Pecr PE=2 SV=1
73	49	tr|A0A0G2JVG4|A0A0G2JVG4_RAT	75.64	6	6	515410	2	2	2	N	32737	Peroxisomal trans-2-enoyl-CoA reductase OS=Rattus norvegicus OX=10116 GN=Pecr PE=1 SV=1
58	53	B3DMA2|ACD11_RAT	74.9	2	2	644530	2	2	2	N	87371	Acyl-CoA dehydrogenase family member 11 OS=Rattus norvegicus OX=10116 GN=Acad11 PE=1 SV=1
48	96	tr|D3ZFJ6|D3ZFJ6_RAT	71.18	10	10	649370	3	3	3	N	60420	Lactamase, beta OS=Rattus norvegicus OX=10116 GN=Lactb PE=1 SV=1
52	29	tr|A0A140TAG5|A0A140TAG5_RAT	70.98	6	6	500310	3	3	3	N	67049	MICOS complex subunit MIC60 OS=Rattus norvegicus OX=10116 GN=Immt PE=1 SV=1
52	30	Q3KR86|MIC60_RAT	70.98	6	6	500310	3	3	3	N	67177	MICOS complex subunit Mic60 (Fragment) OS=Rattus norvegicus OX=10116 GN=Immt PE=1 SV=1
52	22	tr|A0A0G2JVH4|A0A0G2JVH4_RAT	70.98	5	5	500310	3	3	3	N	86230	MICOS complex subunit MIC60 OS=Rattus norvegicus OX=10116 GN=Immt PE=1 SV=1
103	1310	P07872|ACOX1_RAT	69.84	3	3	285760	1	1	1	N	74679	Peroxisomal acyl-coenzyme A oxidase 1 OS=Rattus norvegicus OX=10116 GN=Acox1 PE=1 SV=1
213	8227	Q6UPE0|CHDH_RAT	69.29	4	4	213210	1	1	1	N	66389	Choline dehydrogenase, mitochondrial OS=Rattus norvegicus OX=10116 GN=Chdh PE=1 SV=1
74	36	tr|D3ZG43|D3ZG43_RAT	64.2	6	6	692750	2	2	2	N	30226	NADH dehydrogenase (Ubiquinone) Fe-S protein 3 (Predicted), isoform CRA_c OS=Rattus norvegicus OX=10116 GN=Ndufs3 PE=1 SV=1
123	456	A0A0G2K047|ACSS3_RAT	63.46	2	2	234970	1	1	1	N	74675	Acyl-CoA synthetase short-chain family member 3, mitochondrial OS=Rattus norvegicus OX=10116 GN=Acss3 PE=1 SV=1
53	94	Q7TQ16|QCR8_RAT	60.59	30	30	1922000	3	3	3	N	9849	Cytochrome b-c1 complex subunit 8 OS=Rattus norvegicus OX=10116 GN=Uqcrq PE=3 SV=1
80	189	tr|B2RYS2|B2RYS2_RAT	60.08	14	14	1110900	2	2	2	N	13559	Cytochrome b-c1 complex subunit 7 OS=Rattus norvegicus OX=10116 GN=Uqcrb PE=1 SV=1
63	56	P04636|MDHM_RAT	58.33	5	5	869950	2	2	2	N	35684	Malate dehydrogenase, mitochondrial OS=Rattus norvegicus OX=10116 GN=Mdh2 PE=1 SV=2
79	154	tr|A0A0G2K8Q8|A0A0G2K8Q8_RAT	58	24	24	3819700	2	2	2	N	7099	Ubiquinol-cytochrome c reductase, complex III subunit X OS=Rattus norvegicus OX=10116 GN=Uqcr10 PE=1 SV=1
79	172	tr|B2RYX1|B2RYX1_RAT	58	23	23	3819700	2	2	2	N	7462	LOC685322 protein OS=Rattus norvegicus OX=10116 GN=Uqcr10 PE=2 SV=1
214	254	tr|Q7H115|Q7H115_RAT	53.03	5	5	179840	1	1	1	N	29871	Cytochrome c oxidase subunit 3 OS=Rattus norvegicus OX=10116 GN=Mt-co3 PE=3 SV=1
214	255	tr|I6V4L9|I6V4L9_RAT	53.03	5	5	179840	1	1	1	N	29844	Cytochrome c oxidase subunit 3 OS=Rattus norvegicus OX=10116 GN=COX3 PE=3 SV=1
214	256	tr|Q8M7G4|Q8M7G4_RAT	53.03	5	5	179840	1	1	1	N	29861	Cytochrome c oxidase subunit 3 OS=Rattus norvegicus OX=10116 PE=2 SV=1
214	257	tr|A0A096XKT2|A0A096XKT2_RAT	53.03	5	5	179840	1	1	1	N	29901	Cytochrome c oxidase subunit 3 OS=Rattus norvegicus OX=10116 GN=COX3 PE=3 SV=1
214	258	P05505|COX3_RAT	53.03	5	5	179840	1	1	1	N	29871	Cytochrome c oxidase subunit 3 OS=Rattus norvegicus OX=10116 GN=Mtco3 PE=1 SV=5
214	259	tr|Q8SEZ2|Q8SEZ2_RAT	53.03	5	5	179840	1	1	1	N	29870	Cytochrome c oxidase subunit 3 (Fragment) OS=Rattus norvegicus OX=10116 GN=COIII PE=3 SV=1
215	274	P11951|CX6C2_RAT	52.32	12	12	266410	1	1	1	N	8455	Cytochrome c oxidase subunit 6C-2 OS=Rattus norvegicus OX=10116 GN=Cox6c2 PE=1 SV=3
216	4486	P29419|ATP5I_RAT	48.86	15	15	0	1	1	1	N	8255	ATP synthase subunit e, mitochondrial OS=Rattus norvegicus OX=10116 GN=Atp5me PE=1 SV=3
31	1344	D3ZG52|DNA2_RAT	47.18	3	3	3065600	5	4	6	Y	119588	DNA replication ATP-dependent helicase/nuclease DNA2 OS=Rattus norvegicus OX=10116 GN=Dna2 PE=3 SV=1
31	1345	tr|A0A0H2UH92|A0A0H2UH92_RAT	47.18	2	2	3065600	5	4	6	Y	136526	Graves disease carrier protein OS=Rattus norvegicus OX=10116 GN=Slc25a16 PE=1 SV=1
41	408	P33124|ACSL6_RAT	45.99	4	4	4272700	3	2	4	N	78180	Long-chain-fatty-acid--CoA ligase 6 OS=Rattus norvegicus OX=10116 GN=Acsl6 PE=1 SV=1
122	1035	Q9Z2L0|VDAC1_RAT	45.7	4	4	0	1	1	1	N	30756	Voltage-dependent anion-selective channel protein 1 OS=Rattus norvegicus OX=10116 GN=Vdac1 PE=1 SV=4
121	134	tr|A0A0G2JSH5|A0A0G2JSH5_RAT	45.68	1	1	237960	1	1	1	N	68759	Serum albumin OS=Rattus norvegicus OX=10116 GN=Alb PE=1 SV=1
38	459	tr|F1LPI6|F1LPI6_RAT	45.17	2	2	1302900	4	3	4	N	200075	Peripheral-type benzodiazepine receptor-associated protein 1 OS=Rattus norvegicus OX=10116 GN=Tspoap1 PE=4 SV=1
217	296	P19527|NFL_RAT	40.5	3	3	289740	1	1	1	Y	61335	Neurofilament light polypeptide OS=Rattus norvegicus OX=10116 GN=Nefl PE=1 SV=3
218	4487	tr|Q5UAJ5|Q5UAJ5_RAT	36.98	12	12	802170	1	1	1	N	7642	ATP synthase protein 8 OS=Rattus norvegicus OX=10116 GN=ATP8 PE=3 SV=1
218	4491	P11608|ATP8_RAT	36.98	12	12	802170	1	1	1	N	7630	ATP synthase protein 8 OS=Rattus norvegicus OX=10116 GN=Mt-atp8 PE=1 SV=2
218	4492	tr|Q8SEZ4|Q8SEZ4_RAT	36.98	12	12	802170	1	1	1	N	7632	ATP synthase protein 8 OS=Rattus norvegicus OX=10116 GN=ATPase8 PE=3 SV=1
218	4493	tr|Q8HIC8|Q8HIC8_RAT	36.98	12	12	802170	1	1	1	N	7630	ATP synthase protein 8 OS=Rattus norvegicus OX=10116 GN=Mt-atp8 PE=3 SV=1
222	586	tr|C7EMI4|C7EMI4_RAT	34.09	3	3	0	1	1	1	N	20146	Cytochrome b (Fragment) OS=Rattus norvegicus OX=10116 PE=4 SV=1
222	587	tr|U3M4V1|U3M4V1_RAT	34.09	3	3	0	1	1	1	N	20795	Cytochrome b (Fragment) OS=Rattus norvegicus OX=10116 GN=cyt b PE=4 SV=1
222	588	tr|A4UHZ3|A4UHZ3_RAT	34.09	3	3	0	1	1	1	N	25311	Cytochrome b (Fragment) OS=Rattus norvegicus OX=10116 GN=cytb PE=4 SV=1
222	589	tr|A4UHZ2|A4UHZ2_RAT	34.09	3	3	0	1	1	1	N	25312	Cytochrome b (Fragment) OS=Rattus norvegicus OX=10116 GN=cytb PE=4 SV=1
222	590	tr|B3Y999|B3Y999_RAT	34.09	2	2	0	1	1	1	N	28378	Cytochrome b (Fragment) OS=Rattus norvegicus OX=10116 GN=cytb PE=4 SV=1
222	594	tr|M9TEK6|M9TEK6_RAT	34.09	2	2	0	1	1	1	N	35982	Cytochrome b (Fragment) OS=Rattus norvegicus OX=10116 GN=cytb PE=3 SV=1
222	596	tr|E0A0C7|E0A0C7_RAT	34.09	2	2	0	1	1	1	N	41009	Cytochrome b (Fragment) OS=Rattus norvegicus OX=10116 GN=cytb PE=3 SV=1
222	600	tr|A0A411P2L0|A0A411P2L0_RAT	34.09	2	2	0	1	1	1	N	41017	Cytochrome b (Fragment) OS=Rattus norvegicus OX=10116 GN=Cytb PE=3 SV=1
222	601	tr|E0A016|E0A016_RAT	34.09	2	2	0	1	1	1	N	41634	Cytochrome b (Fragment) OS=Rattus norvegicus OX=10116 GN=cytb PE=3 SV=1
222	603	tr|A0A411P2K0|A0A411P2K0_RAT	34.09	2	2	0	1	1	1	N	42238	Cytochrome b (Fragment) OS=Rattus norvegicus OX=10116 GN=Cytb PE=3 SV=1
222	604	tr|E0A075|E0A075_RAT	34.09	2	2	0	1	1	1	N	42410	Cytochrome b (Fragment) OS=Rattus norvegicus OX=10116 GN=cytb PE=3 SV=1
222	605	tr|L0L4L8|L0L4L8_RAT	34.09	2	2	0	1	1	1	N	42470	Cytochrome b (Fragment) OS=Rattus norvegicus OX=10116 GN=cytb PE=3 SV=1
222	606	tr|A0A140GE09|A0A140GE09_RAT	34.09	2	2	0	1	1	1	N	42569	Cytochrome b (Fragment) OS=Rattus norvegicus OX=10116 PE=3 SV=1
222	607	tr|A0A140GE10|A0A140GE10_RAT	34.09	2	2	0	1	1	1	N	42574	Cytochrome b (Fragment) OS=Rattus norvegicus OX=10116 PE=3 SV=1
222	608	tr|A0A140GE11|A0A140GE11_RAT	34.09	2	2	0	1	1	1	N	42588	Cytochrome b (Fragment) OS=Rattus norvegicus OX=10116 PE=3 SV=1
222	610	tr|A0A385HC91|A0A385HC91_RAT	34.09	2	2	0	1	1	1	N	42780	Cytochrome b (Fragment) OS=Rattus norvegicus OX=10116 PE=3 SV=1
222	611	tr|A0A385HCC9|A0A385HCC9_RAT	34.09	2	2	0	1	1	1	N	42766	Cytochrome b (Fragment) OS=Rattus norvegicus OX=10116 PE=3 SV=1
222	612	tr|A0A3Q8AGE8|A0A3Q8AGE8_RAT	34.09	2	2	0	1	1	1	N	42712	Cytochrome b (Fragment) OS=Rattus norvegicus OX=10116 GN=Cytb PE=3 SV=1
222	613	tr|A0A3Q8AC68|A0A3Q8AC68_RAT	34.09	2	2	0	1	1	1	N	42622	Cytochrome b (Fragment) OS=Rattus norvegicus OX=10116 GN=Cytb PE=3 SV=1
222	614	tr|A0A3S6FK13|A0A3S6FK13_RAT	34.09	2	2	0	1	1	1	N	42702	Cytochrome b (Fragment) OS=Rattus norvegicus OX=10116 GN=Cytb PE=3 SV=1
222	615	tr|A0A385HCK1|A0A385HCK1_RAT	34.09	2	2	0	1	1	1	N	42824	Cytochrome b (Fragment) OS=Rattus norvegicus OX=10116 PE=3 SV=1
222	616	tr|A0A3Q8AZT4|A0A3Q8AZT4_RAT	34.09	2	2	0	1	1	1	N	42723	Cytochrome b (Fragment) OS=Rattus norvegicus OX=10116 GN=Cytb PE=3 SV=1
222	617	tr|A0A3S6FK10|A0A3S6FK10_RAT	34.09	2	2	0	1	1	1	N	42726	Cytochrome b (Fragment) OS=Rattus norvegicus OX=10116 GN=Cytb PE=3 SV=1
222	618	tr|A0A385HC93|A0A385HC93_RAT	34.09	2	2	0	1	1	1	N	42751	Cytochrome b (Fragment) OS=Rattus norvegicus OX=10116 PE=3 SV=1
222	619	tr|A0A3S6FM15|A0A3S6FM15_RAT	34.09	2	2	0	1	1	1	N	42698	Cytochrome b (Fragment) OS=Rattus norvegicus OX=10116 GN=Cytb PE=3 SV=1
222	621	tr|A0A097PE40|A0A097PE40_RAT	34.09	2	2	0	1	1	1	N	42865	Cytochrome b OS=Rattus norvegicus OX=10116 GN=CYTB PE=3 SV=1
222	622	tr|A0A220D9Z6|A0A220D9Z6_RAT	34.09	2	2	0	1	1	1	N	43018	Cytochrome b OS=Rattus norvegicus OX=10116 PE=3 SV=1
222	623	tr|D6NSP2|D6NSP2_RAT	34.09	2	2	0	1	1	1	N	42945	Cytochrome b (Fragment) OS=Rattus norvegicus OX=10116 GN=cytb PE=3 SV=1
222	624	tr|D6NSS6|D6NSS6_RAT	34.09	2	2	0	1	1	1	N	42993	Cytochrome b (Fragment) OS=Rattus norvegicus OX=10116 GN=cytb PE=3 SV=1
222	625	tr|Q06Q99|Q06Q99_RAT	34.09	2	2	0	1	1	1	N	42997	Cytochrome b OS=Rattus norvegicus OX=10116 GN=CYB PE=3 SV=1
222	626	tr|L0N490|L0N490_RAT	34.09	2	2	0	1	1	1	N	43056	Cytochrome b (Fragment) OS=Rattus norvegicus OX=10116 GN=cytb PE=3 SV=1
222	627	tr|D6NSQ3|D6NSQ3_RAT	34.09	2	2	0	1	1	1	N	43012	Cytochrome b (Fragment) OS=Rattus norvegicus OX=10116 GN=cytb PE=3 SV=1
222	628	tr|D6NSR3|D6NSR3_RAT	34.09	2	2	0	1	1	1	N	42986	Cytochrome b (Fragment) OS=Rattus norvegicus OX=10116 GN=cytb PE=3 SV=1
222	629	tr|D6NSP4|D6NSP4_RAT	34.09	2	2	0	1	1	1	N	43016	Cytochrome b (Fragment) OS=Rattus norvegicus OX=10116 GN=cytb PE=3 SV=1
222	630	tr|D6NSQ8|D6NSQ8_RAT	34.09	2	2	0	1	1	1	N	43016	Cytochrome b (Fragment) OS=Rattus norvegicus OX=10116 GN=cytb PE=3 SV=1
222	631	tr|D6NSR8|D6NSR8_RAT	34.09	2	2	0	1	1	1	N	42998	Cytochrome b (Fragment) OS=Rattus norvegicus OX=10116 GN=cytb PE=3 SV=1
222	632	tr|F8QU37|F8QU37_RAT	34.09	2	2	0	1	1	1	N	42992	Cytochrome b (Fragment) OS=Rattus norvegicus OX=10116 GN=cytb PE=3 SV=1
222	633	tr|F2Q6S6|F2Q6S6_RAT	34.09	2	2	0	1	1	1	N	42938	Cytochrome b (Fragment) OS=Rattus norvegicus OX=10116 GN=cytb PE=3 SV=1
222	634	tr|A0A0A1FZ42|A0A0A1FZ42_RAT	34.09	2	2	0	1	1	1	N	42989	Cytochrome b OS=Rattus norvegicus OX=10116 GN=CYTB PE=3 SV=1
222	635	tr|D6NSS7|D6NSS7_RAT	34.09	2	2	0	1	1	1	N	42948	Cytochrome b (Fragment) OS=Rattus norvegicus OX=10116 GN=cytb PE=3 SV=1
222	636	tr|Q8SEY9|Q8SEY9_RAT	34.09	2	2	0	1	1	1	N	43015	Cytochrome b OS=Rattus norvegicus OX=10116 GN=cytb PE=3 SV=1
222	637	tr|D6NSR7|D6NSR7_RAT	34.09	2	2	0	1	1	1	N	42982	Cytochrome b (Fragment) OS=Rattus norvegicus OX=10116 GN=cytb PE=3 SV=1
222	638	tr|A0A220DA44|A0A220DA44_RAT	34.09	2	2	0	1	1	1	N	42968	Cytochrome b OS=Rattus norvegicus OX=10116 PE=3 SV=1
222	640	tr|D6NSP0|D6NSP0_RAT	34.09	2	2	0	1	1	1	N	43023	Cytochrome b (Fragment) OS=Rattus norvegicus OX=10116 GN=cytb PE=3 SV=1
222	641	tr|D6NSQ6|D6NSQ6_RAT	34.09	2	2	0	1	1	1	N	42952	Cytochrome b (Fragment) OS=Rattus norvegicus OX=10116 GN=cytb PE=3 SV=1
222	642	tr|L0N495|L0N495_RAT	34.09	2	2	0	1	1	1	N	42992	Cytochrome b (Fragment) OS=Rattus norvegicus OX=10116 GN=cytb PE=3 SV=1
222	643	tr|D6NSQ0|D6NSQ0_RAT	34.09	2	2	0	1	1	1	N	42968	Cytochrome b (Fragment) OS=Rattus norvegicus OX=10116 GN=cytb PE=3 SV=1
222	644	tr|Q5UAI7|Q5UAI7_RAT	34.09	2	2	0	1	1	1	N	42998	Cytochrome b OS=Rattus norvegicus OX=10116 GN=CYTB PE=3 SV=1
222	645	tr|D6NSR2|D6NSR2_RAT	34.09	2	2	0	1	1	1	N	43073	Cytochrome b (Fragment) OS=Rattus norvegicus OX=10116 GN=cytb PE=3 SV=1
222	646	tr|A0A0S1Z1V9|A0A0S1Z1V9_RAT	34.09	2	2	0	1	1	1	N	43002	Cytochrome b OS=Rattus norvegicus OX=10116 GN=CYTB PE=3 SV=1
222	647	tr|B0M1Q8|B0M1Q8_RAT	34.09	2	2	0	1	1	1	N	43026	Cytochrome b (Fragment) OS=Rattus norvegicus OX=10116 GN=cytb PE=3 SV=1
222	648	tr|D6NSR9|D6NSR9_RAT	34.09	2	2	0	1	1	1	N	42970	Cytochrome b (Fragment) OS=Rattus norvegicus OX=10116 GN=cytb PE=3 SV=1
222	649	tr|D6NSR1|D6NSR1_RAT	34.09	2	2	0	1	1	1	N	43002	Cytochrome b (Fragment) OS=Rattus norvegicus OX=10116 GN=cytb PE=3 SV=1
222	650	tr|Q8HIC4|Q8HIC4_RAT	34.09	2	2	0	1	1	1	N	43012	Cytochrome b OS=Rattus norvegicus OX=10116 GN=Mt-cyb PE=3 SV=1
222	651	tr|A0A220DA02|A0A220DA02_RAT	34.09	2	2	0	1	1	1	N	42968	Cytochrome b OS=Rattus norvegicus OX=10116 PE=3 SV=1
222	652	tr|S5RKC8|S5RKC8_RAT	34.09	2	2	0	1	1	1	N	42997	Cytochrome b OS=Rattus norvegicus OX=10116 GN=CYTB PE=3 SV=1
222	653	tr|A0A0S1Z1V4|A0A0S1Z1V4_RAT	34.09	2	2	0	1	1	1	N	43016	Cytochrome b OS=Rattus norvegicus OX=10116 GN=CYTB PE=3 SV=1
222	654	tr|R9TKN1|R9TKN1_RAT	34.09	2	2	0	1	1	1	N	43012	Cytochrome b OS=Rattus norvegicus OX=10116 GN=CYTB PE=3 SV=1
222	655	P00159|CYB_RAT	34.09	2	2	0	1	1	1	N	43012	Cytochrome b OS=Rattus norvegicus OX=10116 GN=Mt-Cyb PE=3 SV=3
222	656	tr|D6NSP8|D6NSP8_RAT	34.09	2	2	0	1	1	1	N	43100	Cytochrome b (Fragment) OS=Rattus norvegicus OX=10116 GN=cytb PE=3 SV=1
222	657	tr|L0N311|L0N311_RAT	34.09	2	2	0	1	1	1	N	43045	Cytochrome b (Fragment) OS=Rattus norvegicus OX=10116 GN=cytb PE=3 SV=1
222	658	tr|A0A220DA20|A0A220DA20_RAT	34.09	2	2	0	1	1	1	N	43010	Cytochrome b OS=Rattus norvegicus OX=10116 PE=3 SV=1
222	659	tr|A0A220D9W5|A0A220D9W5_RAT	34.09	2	2	0	1	1	1	N	43028	Cytochrome b OS=Rattus norvegicus OX=10116 GN=cyt-b PE=3 SV=1
222	660	tr|A0A220DA28|A0A220DA28_RAT	34.09	2	2	0	1	1	1	N	42970	Cytochrome b OS=Rattus norvegicus OX=10116 PE=3 SV=1
222	661	tr|H6RXT5|H6RXT5_RAT	34.09	2	2	0	1	1	1	N	43044	Cytochrome b OS=Rattus norvegicus OX=10116 GN=cytb PE=3 SV=1
222	662	tr|H2KXA0|H2KXA0_RAT	34.09	2	2	0	1	1	1	N	42978	Cytochrome b (Fragment) OS=Rattus norvegicus OX=10116 GN=cytb PE=3 SV=1
222	663	tr|L0N1V8|L0N1V8_RAT	34.09	2	2	0	1	1	1	N	43058	Cytochrome b (Fragment) OS=Rattus norvegicus OX=10116 GN=cytb PE=3 SV=1
222	664	tr|A0A096XNM4|A0A096XNM4_RAT	34.09	2	2	0	1	1	1	N	43042	Cytochrome b (Fragment) OS=Rattus norvegicus OX=10116 PE=3 SV=1
222	665	tr|D6NSP7|D6NSP7_RAT	34.09	2	2	0	1	1	1	N	43046	Cytochrome b (Fragment) OS=Rattus norvegicus OX=10116 GN=cytb PE=3 SV=1
222	666	tr|A0A220D9Z3|A0A220D9Z3_RAT	34.09	2	2	0	1	1	1	N	43024	Cytochrome b OS=Rattus norvegicus OX=10116 PE=3 SV=1
222	667	tr|D6NSP5|D6NSP5_RAT	34.09	2	2	0	1	1	1	N	43012	Cytochrome b (Fragment) OS=Rattus norvegicus OX=10116 GN=cytb PE=3 SV=1
222	558	tr|D6NSP6|D6NSP6_RAT	34.09	2	2	0	1	1	1	N	43050	Cytochrome b (Fragment) OS=Rattus norvegicus OX=10116 GN=cytb PE=3 SV=1
222	552	tr|Q9G898|Q9G898_RAT	34.09	2	2	0	1	1	1	N	42830	Cytochrome b OS=Rattus norvegicus OX=10116 PE=2 SV=1
152	1110	Q06437|ODPAT_RAT	33.4	3	3	330540	1	1	1	N	43393	Pyruvate dehydrogenase E1 component subunit alpha, testis-specific form, mitochondrial OS=Rattus norvegicus OX=10116 GN=Pdha2 PE=1 SV=1
221	12926	tr|D4A9V7|D4A9V7_RAT	33.37	1	1	213730	1	1	1	N	65753	Methionine--tRNA ligase, mitochondrial-like OS=Rattus norvegicus OX=10116 GN=LOC100911305 PE=1 SV=1
219	282	P19804|NDKB_RAT	33.26	8	8	234580	1	1	1	N	17283	Nucleoside diphosphate kinase B OS=Rattus norvegicus OX=10116 GN=Nme2 PE=1 SV=1
219	283	Q05982|NDKA_RAT	33.26	8	8	234580	1	1	1	N	17193	Nucleoside diphosphate kinase A OS=Rattus norvegicus OX=10116 GN=Nme1 PE=1 SV=1
78	4527	Q6RI88|S4A5_RAT	33.15	1	1	21633000	2	1	2	N	123944	Electrogenic sodium bicarbonate cotransporter 4 OS=Rattus norvegicus OX=10116 GN=Slc4a5 PE=1 SV=1
81	478	Q64578|AT2A1_RAT	32.86	1	1	3992200	1	1	2	Y	109409	Sarcoplasmic/endoplasmic reticulum calcium ATPase 1 OS=Rattus norvegicus OX=10116 GN=Atp2a1 PE=1 SV=1
83	410	tr|F1LRY0|F1LRY0_RAT	32.41	7	7	587880	2	1	2	Y	26077	Max dimerization protein 1 OS=Rattus norvegicus OX=10116 GN=Mxd1 PE=4 SV=1
67	121	P08461|ODP2_RAT	32.13	3	3	333050	2	1	2	Y	67166	Dihydrolipoyllysine-residue acetyltransferase component of pyruvate dehydrogenase complex, mitochondrial OS=Rattus norvegicus OX=10116 GN=Dlat PE=1 SV=3
55	834	tr|A0A0G2JYD4|A0A0G2JYD4_RAT	31.22	0	0	3130200	2	2	2	N	487857	Vacuolar protein sorting 13 homolog D OS=Rattus norvegicus OX=10116 GN=Vps13d PE=1 SV=1
55	835	tr|D3ZKC6|D3ZKC6_RAT	31.22	0	0	3130200	2	2	2	N	488962	Vacuolar protein sorting 13 homolog D OS=Rattus norvegicus OX=10116 GN=Vps13d PE=1 SV=1
71	450	tr|D4A4K4|D4A4K4_RAT	31.11	0	0	1163800	2	2	2	N	418626	Vacuolar protein sorting 13 homolog C OS=Rattus norvegicus OX=10116 GN=Vps13c PE=1 SV=2
220	5083	Q6AY30|SCPDL_RAT	30.98	7	7	7817.8	1	1	1	N	47088	Saccharopine dehydrogenase-like oxidoreductase OS=Rattus norvegicus OX=10116 GN=Sccpdh PE=1 SV=1
157	8233	tr|F1LN88|F1LN88_RAT	30.96	2	2	504540	1	1	1	N	56517	Aldehyde dehydrogenase, mitochondrial OS=Rattus norvegicus OX=10116 GN=Aldh2 PE=1 SV=2
157	8234	P11884|ALDH2_RAT	30.96	2	2	504540	1	1	1	N	56488	Aldehyde dehydrogenase, mitochondrial OS=Rattus norvegicus OX=10116 GN=Aldh2 PE=1 SV=1
84	12529	Q3B8Q1|DDX21_RAT	30.81	2	2	0	2	2	2	N	85966	Nucleolar RNA helicase 2 OS=Rattus norvegicus OX=10116 GN=Ddx21 PE=2 SV=1
223	23454	P18886|CPT2_RAT	30.22	1	1	0	1	1	1	N	74110	Carnitine O-palmitoyltransferase 2, mitochondrial OS=Rattus norvegicus OX=10116 GN=Cpt2 PE=1 SV=1
223	23455	tr|G3V7N5|G3V7N5_RAT	30.22	1	1	0	1	1	1	N	74078	Carnitine O-palmitoyltransferase 2, mitochondrial OS=Rattus norvegicus OX=10116 GN=Cpt2 PE=1 SV=1
54	1365	tr|D3ZXY2|D3ZXY2_RAT	29.91	3	3	2458000	3	3	3	Y	128251	PDZ domain containing 8 (Predicted) OS=Rattus norvegicus OX=10116 GN=Pdzd8 PE=1 SV=1
224	23457	Q5XIA8|GHITM_RAT	28.77	4	4	0	1	1	1	N	37178	Growth hormone-inducible transmembrane protein OS=Rattus norvegicus OX=10116 GN=Ghitm PE=2 SV=1
111	555	P15205|MAP1B_RAT	2020-10-28	0	0	115790	1	1	1	N	269640	Microtubule-associated protein 1B OS=Rattus norvegicus OX=10116 GN=Map1b PE=1 SV=3
86	1281	tr|F1M9H4|F1M9H4_RAT	2020-09-28	1	1	972630	2	2	2	N	225602	HIVEP zinc finger 1 OS=Rattus norvegicus OX=10116 GN=Hivep1 PE=1 SV=2
159	4619	P35559|IDE_RAT	27.7	1	1	0	1	1	1	N	117710	Insulin-degrading enzyme OS=Rattus norvegicus OX=10116 GN=Ide PE=1 SV=1
66	741	tr|A0A0G2K3N1|A0A0G2K3N1_RAT	26.19	2	2	1006500	2	2	2	Y	205333	Golgi brefeldin A-resistant guanine nucleotide exchange factor 1 OS=Rattus norvegicus OX=10116 GN=Gbf1 PE=1 SV=1
66	742	tr|F1M8X9|F1M8X9_RAT	26.19	2	2	1006500	2	2	2	Y	206522	Golgi brefeldin A-resistant guanine nucleotide exchange factor 1 OS=Rattus norvegicus OX=10116 GN=Gbf1 PE=1 SV=2
77	5209	tr|Q5U2M4|Q5U2M4_RAT	26.17	1	1	0	2	1	2	N	105443	DNA ligase OS=Rattus norvegicus OX=10116 GN=Lig3 PE=1 SV=1
77	1338	tr|A0A096MKE9|A0A096MKE9_RAT	26.17	1	1	0	2	1	2	N	112017	DNA ligase OS=Rattus norvegicus OX=10116 GN=Lig3 PE=1 SV=1
61	1506	tr|D4A1D3|D4A1D3_RAT	25.15	0	0	672090	2	2	2	Y	521487	Sacsin molecular chaperone OS=Rattus norvegicus OX=10116 GN=Sacs PE=1 SV=2
163	141	Q924S5|LONM_RAT	24.69	1	1	41430	1	1	1	N	105792	Lon protease homolog, mitochondrial OS=Rattus norvegicus OX=10116 GN=Lonp1 PE=2 SV=1
69	769	Q64680|CP2D4_RAT	24.5	3	3	3700700	2	2	2	N	56684	Cytochrome P450 2D4 OS=Rattus norvegicus OX=10116 GN=Cyp2d4 PE=2 SV=1
231	23460	tr|Q3B8P7|Q3B8P7_RAT	24.29	3	3	2003500	1	1	1	Y	27522	RCG58555, isoform CRA_a OS=Rattus norvegicus OX=10116 GN=LOC683897 PE=2 SV=1
231	23461	tr|M0R7R2|M0R7R2_RAT	24.29	3	3	2003500	1	1	1	Y	29265	Similar to Protein C6orf203 OS=Rattus norvegicus OX=10116 GN=LOC683897 PE=1 SV=1
100	372	tr|F1LNJ1|F1LNJ1_RAT	24.26	1	1	262740	1	1	1	Y	284829	Leucine-rich repeat kinase 2 OS=Rattus norvegicus OX=10116 GN=Lrrk2 PE=1 SV=3
229	12586	tr|A0A0G2JTG1|A0A0G2JTG1_RAT	23.91	10	10	0	1	1	1	Y	9388	10 kDa heat shock protein, mitochondrial OS=Rattus norvegicus OX=10116 GN=Hspe1 PE=1 SV=1
229	12587	tr|P97601|P97601_RAT	23.91	9	9	0	1	1	1	Y	10876	Chaperonin 10 OS=Rattus norvegicus OX=10116 GN=Hspe1 PE=3 SV=1
229	12588	P26772|CH10_RAT	23.91	9	9	0	1	1	1	Y	10902	10 kDa heat shock protein, mitochondrial OS=Rattus norvegicus OX=10116 GN=Hspe1 PE=1 SV=3
124	162	tr|D3Z900|D3Z900_RAT	23.47	3	3	0	1	1	1	N	38239	Mitochondrial amidoxime reducing component 2 OS=Rattus norvegicus OX=10116 GN=Marc2 PE=1 SV=2
124	163	O88994|MARC2_RAT	23.47	3	3	0	1	1	1	N	38249	Mitochondrial amidoxime reducing component 2 OS=Rattus norvegicus OX=10116 GN=Marc2 PE=2 SV=1
124	164	tr|M0R6N2|M0R6N2_RAT	23.47	3	3	0	1	1	1	N	38175	MOSC domain-containing protein 2, mitochondrial-like OS=Rattus norvegicus OX=10116 GN=LOC100910481 PE=1 SV=1
234	4650	Q5I0L3|SYYM_RAT	23.46	1	1	304950	1	1	1	N	52628	Tyrosine--tRNA ligase, mitochondrial OS=Rattus norvegicus OX=10116 GN=Yars2 PE=2 SV=1
232	23462	Q5XIG0|NUDT9_RAT	23.35	3	3	554110	1	1	1	Y	38562	ADP-ribose pyrophosphatase, mitochondrial OS=Rattus norvegicus OX=10116 GN=Nudt9 PE=2 SV=1
134	1188	P04694|ATTY_RAT	23.19	2	2	614700	1	1	1	Y	50635	Tyrosine aminotransferase OS=Rattus norvegicus OX=10116 GN=Tat PE=1 SV=1
164	233	Q5U2U0|CLPX_RAT	23.16	1	1	384440	1	1	1	N	69208	ATP-dependent Clp protease ATP-binding subunit clpX-like, mitochondrial OS=Rattus norvegicus OX=10116 GN=Clpx PE=2 SV=1
237	348	tr|B2GUZ6|B2GUZ6_RAT	2020-06-23	2	2	231090	1	1	1	Y	43606	Reticulon 4-interacting protein 1 OS=Rattus norvegicus OX=10116 GN=Rtn4ip1 PE=1 SV=1
141	264	B1WC61|ACAD9_RAT	22.86	2	2	29812	1	1	1	Y	68843	Complex I assembly factor ACAD9, mitochondrial OS=Rattus norvegicus OX=10116 GN=Acad9 PE=1 SV=1
236	23466	Q5M7W1|TXNIP_RAT	22.46	2	2	0	1	1	1	N	44018	Thioredoxin-interacting protein OS=Rattus norvegicus OX=10116 GN=Txnip PE=2 SV=1
105	394	tr|Q6TXF6|Q6TXF6_RAT	22.25	1	1	176760	1	1	1	N	95435	LRRGT00043 OS=Rattus norvegicus OX=10116 GN=Decr2 PE=1 SV=1
165	421	P11497|ACACA_RAT	21.67	1	1	0	1	1	1	Y	265191	Acetyl-CoA carboxylase 1 OS=Rattus norvegicus OX=10116 GN=Acaca PE=1 SV=1
241	749	tr|D3ZJX5|D3ZJX5_RAT	21.39	2	2	0	1	1	1	N	39855	Mitochondrial import inner membrane translocase subunit TIM50 OS=Rattus norvegicus OX=10116 GN=Timm50 PE=1 SV=2
243	4992	P80431|COX7B_RAT	20.94	9	9	247390	1	1	1	N	8995	Cytochrome c oxidase subunit 7B, mitochondrial OS=Rattus norvegicus OX=10116 GN=Cox7b PE=1 SV=3
242	4519	tr|D3ZA45|D3ZA45_RAT	20.91	2	2	559110	1	1	1	N	52491	Autophagy-related protein 13 OS=Rattus norvegicus OX=10116 GN=Atg13 PE=1 SV=2
244	1077	Q9QYV8|DPOG1_RAT	20.72	1	1	145750	1	1	1	N	136855	DNA polymerase subunit gamma-1 OS=Rattus norvegicus OX=10116 GN=Polg PE=2 SV=1
128	1019	Q2M2R8|PEX5_RAT	20.55	1	1	187350	1	1	1	N	71022	Peroxisomal targeting signal 1 receptor OS=Rattus norvegicus OX=10116 GN=Pex5 PE=1 SV=2
245	498	tr|Q5U2X8|Q5U2X8_RAT	20.45	2	2	1233700	1	1	1	N	50444	Acyl-CoA thioesterase 9 OS=Rattus norvegicus OX=10116 GN=Acot9 PE=1 SV=1
172	12880	P16310|GHR_RAT	20.14	2	2	679350	1	1	1	N	71237	Growth hormone receptor OS=Rattus norvegicus OX=10116 GN=Ghr PE=1 SV=1
101	12752	tr|D3ZAE6|D3ZAE6_RAT	2020-11-20	1	1	671140	1	1	1	Y	72321	RCG49849 OS=Rattus norvegicus OX=10116 GN=Vasn PE=1 SV=1
