# Supplementary figures and images for: Mitochondrial F-ATP Synthase Co-Migrating Proteins and Ca2+-Dependent Formation of Large Channels
Source: MDPI journal article supplement (doi:10.3390/cells12192414), 2023-10-07

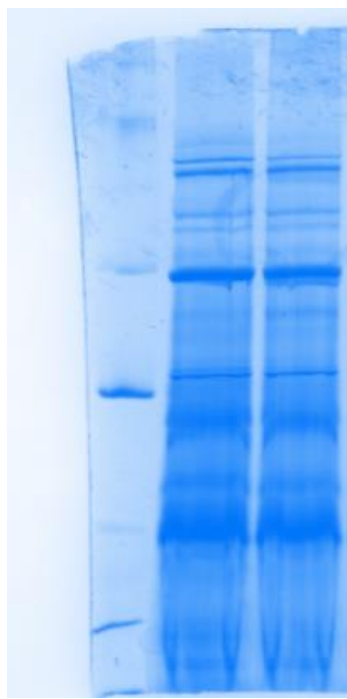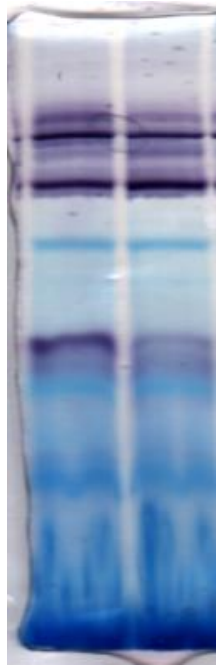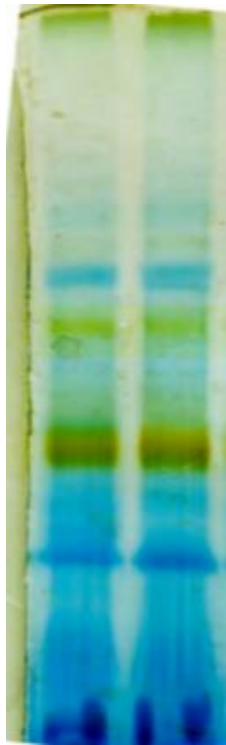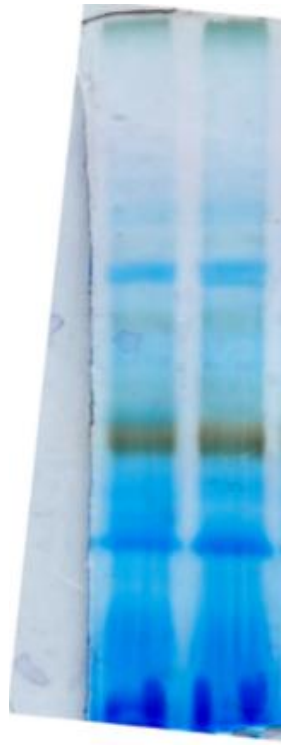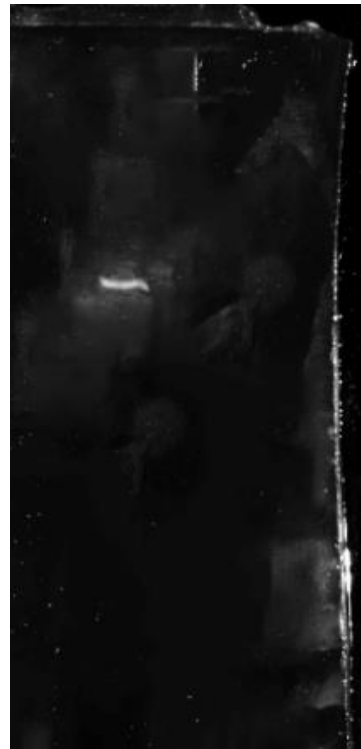

To Fig 1

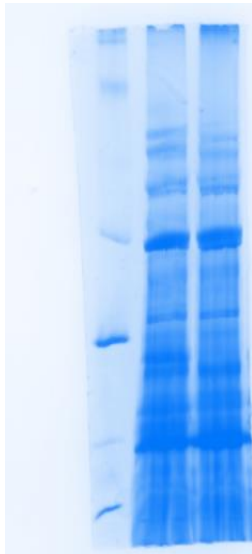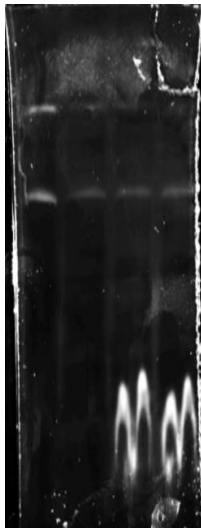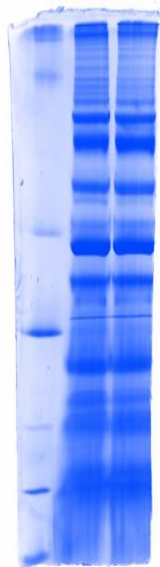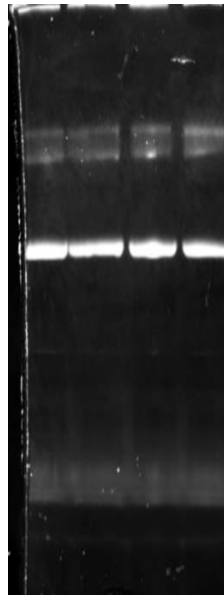

To Supl

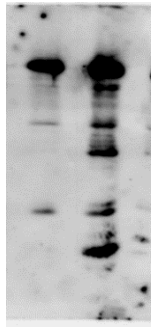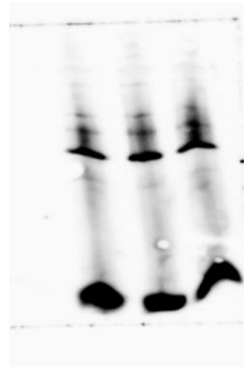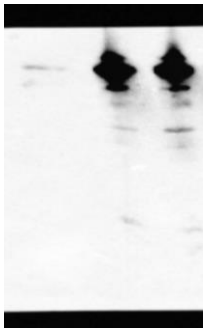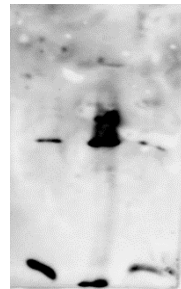

Supplement: s1 [file s1]
